# Supplementary material for: Multi-dimensional social relationships shape social attention in monkeys
Source: eLife. 2025 Mar 7;14:RP104460. doi: 10.7554/eLife.104460 (PMC11888598; doi:10.7554/eLife.104460)
Supplement: Figure 1—figure supplement 1—source data 1. [file elife-104460-fig1-figsupp1-data1.xlsx]

## Sheet: Fig.S1b
ML									MK									time (ms)	ML-posture	MK -posture	ML-proximity	MK -proximity
body			butt			head			body			butt			head			0	1	2	1	1
time (ms)	state		time (ms)	state		time (ms)	state		time (ms)	state		time (ms)	state		time (ms)	state		1	2	2	1	1
0	0		0	0		0	0		0	1		0	1		0	1		2	2	2	1	1
1	0		1	0		1	1		1	0		1	0		1	1		3	2	2	1	1
2	0		2	0		2	1		2	0		2	0		2	1		4	2	2	1	1
3	0		3	0		3	1		3	0		3	0		3	1		5	2	2	1	1
4	0		4	0		4	1		4	0		4	0		4	1		6	2	2	1	1
5	0		5	0		5	1		5	0		5	0		5	1		7	2	2	1	1
6	0		6	0		6	1		6	0		6	0		6	1		8	2	2	1	1
7	0		7	0		7	1		7	0		7	0		7	1		9	2	2	1	1
8	0		8	0		8	1		8	0		8	0		8	1		10	2	2	1	1
9	0		9	0		9	1		9	0		9	0		9	1		11	2	2	1	1
10	0		10	0		10	1		10	0		10	0		10	1		12	2	2	1	1
11	0		11	0		11	1		11	0		11	0		11	1		13	2	2	1	1
12	0		12	0		12	1		12	0		12	0		12	1		14	2	2	1	1
13	0		13	0		13	1		13	0		13	0		13	1		15	0	2	0	1
14	1		14	0		14	1		14	0		14	0		14	1		16	0	2	0	1
15	0		15	0		15	0		15	0		15	0		15	1		17	0	2	0	1
16	0		16	0		16	0		16	0		16	0		16	1		18	0	2	0	1
17	0		17	0		17	0		17	0		17	0		17	1		19	2	2	1	1
18	0		18	0		18	0		18	0		18	0		18	1		20	2	2	1	1
19	0		19	0		19	1		19	0		19	0		19	1		21	2	2	1	1
20	0		20	0		20	1		20	0		20	0		20	1		22	2	2	1	1
21	0		21	0		21	1		21	0		21	0		21	1		23	2	2	1	1
22	0		22	0		22	1		22	0		22	0		22	1		24	2	2	1	1
23	0		23	0		23	1		23	0		23	0		23	1		25	2	2	1	1
24	0		24	0		24	1		24	0		24	0		24	1		26	2	2	1	1
25	0		25	0		25	1		25	0		25	0		25	1		27	2	2	1	1
26	0		26	0		26	1		26	0		26	0		26	1		28	2	2	1	1
27	0		27	0		27	1		27	0		27	0		27	1		29	2	2	1	1
28	1		28	0		28	1		28	0		28	0		28	1		30	2	2	1	1
29	0		29	0		29	1		29	0		29	0		29	1		31	2	2	1	1
30	1		30	0		30	1		30	0		30	0		30	1		32	2	2	1	1
31	0		31	0		31	1		31	0		31	0		31	1		33	2	2	1	1
32	1		32	0		32	1		32	0		32	0		32	1		34	2	2	1	1
33	1		33	0		33	1		33	0		33	0		33	1		35	2	2	1	1
34	0		34	0		34	1		34	0		34	0		34	1		36	2	2	1	1
35	0		35	0		35	1		35	0		35	0		35	1		37	2	2	1	1
36	0		36	0		36	1		36	0		36	0		36	1		38	2	2	1	1
37	0		37	0		37	1		37	0		37	0		37	1		39	2	2	1	1
38	0		38	0		38	1		38	0		38	0		38	1		40	2	2	1	1
39	1		39	0		39	1		39	0		39	0		39	1		41	2	2	1	1
40	1		40	0		40	1		40	0		40	0		40	1		42	2	2	1	1
41	1		41	0		41	1		41	0		41	0		41	1		43	2	2	1	1
42	1		42	0		42	1		42	0		42	0		42	1		44	2	2	1	1
43	1		43	0		43	1		43	0		43	0		43	1		45	2	2	1	1
44	1		44	0		44	1		44	0		44	0		44	1		46	2	2	1	1
45	1		45	0		45	1		45	0		45	0		45	1		47	2	2	1	1
46	1		46	0		46	1		46	0		46	0		46	1		48	2	2	1	1
47	0		47	0		47	1		47	0		47	0		47	1		49	2	2	1	1
48	0		48	0		48	1		48	0		48	0		48	1		50	2	2	1	1
49	0		49	0		49	1		49	0		49	0		49	1		51	2	2	1	1
50	0		50	0		50	1		50	0		50	0		50	1		52	2	2	1	1
51	0		51	0		51	1		51	0		51	0		51	1		53	2	2	1	1
52	0		52	0		52	1		52	0		52	0		52	1		54	2	2	1	1
53	0		53	0		53	1		53	0		53	0		53	1		55	2	2	1	1
54	0		54	0		54	1		54	0		54	0		54	1		56	2	1	1	1
55	0		55	0		55	1		55	0		55	0		55	1		57	2	1	1	1
56	0		56	0		56	1		56	0		56	0		56	0		58	2	1	1	1
57	0		57	0		57	1		57	0		57	0		57	0		59	2	1	1	1
58	0		58	0		58	1		58	0		58	0		58	0		60	2	1	1	1
59	0		59	0		59	1		59	0		59	0		59	0		61	2	1	1	1
60	0		60	0		60	1		60	3		60	3		60	0		62	2	1	1	1
61	0		61	0		61	1		61	0		61	0		61	0		63	2	1	1	1
62	0		62	0		62	1		62	0		62	0		62	0		64	2	1	1	1
63	0		63	0		63	1		63	0		63	0		63	0		65	2	1	1	1
64	0		64	0		64	1		64	0		64	0		64	0		66	2	1	1	1
65	0		65	0		65	1		65	0		65	0		65	0		67	2	0	1	0
66	0		66	0		66	1		66	0		66	0		66	0		68	2	1	1	1
67	0		67	0		67	1		67	0		67	0		67	0		69	2	1	1	1
68	0		68	0		68	1		68	0		68	0		68	0		70	2	1	1	1
69	0		69	0		69	1		69	0		69	0		69	0		71	2	1	1	1
70	0		70	0		70	1		70	0		70	0		70	0		72	2	1	1	1
71	0		71	0		71	1		71	0		71	0		71	0		73	2	1	1	1
72	0		72	0		72	1		72	0		72	0		72	0		74	2	1	1	1
73	0		73	0		73	1		73	0		73	0		73	0		75	2	1	1	1
74	0		74	0		74	1		74	0		74	0		74	0		76	2	1	1	1
75	0		75	0		75	1		75	0		75	0		75	0		77	2	1	1	1
76	0		76	0		76	1		76	0		76	0		76	0		78	2	1	1	1
77	0		77	0		77	1		77	0		77	0		77	0		79	2	2	1	1
78	0		78	0		78	1		78	0		78	0		78	0		80	2	1	1	1
79	0		79	0		79	1		79	0		79	0		79	1		81	2	1	1	1
80	0		80	0		80	1		80	0		80	0		80	0		82	2	2	1	1
81	0		81	0		81	1		81	0		81	0		81	0		83	2	2	1	1
82	0		82	0		82	1		82	0		82	0		82	1		84	2	2	1	1
83	0		83	0		83	1		83	0		83	0		83	1		85	2	2	1	1
84	0		84	0		84	1		84	0		84	0		84	1		86	2	1	1	1
85	0		85	0		85	1		85	0		85	0		85	1		87	2	1	1	1
86	0		86	0		86	1		86	0		86	0		86	0		88	2	1	1	1
87	0		87	0		87	1		87	0		87	0		87	0		89	2	1	1	1
88	0		88	0		88	1		88	0		88	0		88	0		90	2	1	1	1
89	0		89	0		89	1		89	0		89	0		89	0		91	2	1	1	1
90	0		90	0		90	1		90	0		90	0		90	0		92	2	2	1	1
91	0		91	0		91	1		91	0		91	0		91	0		93	2	2	1	1
92	0		92	0		92	1		92	0		92	0		92	1		94	2	1	1	1
93	0		93	0		93	1		93	0		93	0		93	1		95	2	1	1	1
94	0		94	0		94	1		94	0		94	0		94	0		96	2	1	1	1
95	0		95	0		95	1		95	0		95	0		95	0		97	2	1	1	1
96	0		96	0		96	1		96	0		96	0		96	0		98	2	1	1	1
97	0		97	0		97	1		97	0		97	0		97	0		99	2	1	1	1
98	0		98	0		98	1		98	0		98	0		98	0		100	2	1	1	1
99	0		99	0		99	1		99	0		99	0		99	0		101	2	1	1	1
100	0		100	0		100	1		100	0		100	0		100	0		102	2	1	1	1
101	0		101	0		101	1		101	0		101	0		101	0		103	2	1	1	1
102	0		102	0		102	1		102	0		102	0		102	0		104	2	1	1	1
103	0		103	0		103	1		103	0		103	0		103	0		105	2	1	1	1
104	0		104	0		104	1		104	0		104	0		104	0		106	2	1	1	1
105	0		105	0		105	1		105	0		105	0		105	0		107	2	1	1	1
106	0		106	0		106	1		106	0		106	0		106	0		108	2	1	1	1
107	0		107	0		107	1		107	0		107	0		107	0		109	2	1	1	1
108	0		108	0		108	1		108	0		108	0		108	0		110	2	1	1	1
109	0		109	0		109	1		109	0		109	0		109	0		111	2	1	1	1
110	0		110	0		110	1		110	0		110	0		110	0		112	2	1	1	1
111	0		111	0		111	1		111	0		111	0		111	0		113	2	1	1	1
112	0		112	0		112	1		112	0		112	0		112	0		114	2	1	1	1
113	0		113	0		113	1		113	0		113	0		113	0		115	2	1	1	1
114	0		114	0		114	1		114	0		114	0		114	0		116	2	1	1	1
115	0		115	0		115	1		115	0		115	0		115	0		117	2	1	1	1
116	0		116	0		116	1		116	0		116	0		116	0		118	2	1	1	1
117	0		117	0		117	1		117	0		117	0		117	0		119	2	1	1	1
118	0		118	0		118	1		118	0		118	0		118	0		120	2	1	1	1
119	0		119	0		119	1		119	0		119	0		119	0		121	2	1	1	1
120	0		120	0		120	1		120	3		120	3		120	0		122	2	1	1	1
121	0		121	0		121	1		121	0		121	0		121	0		123	2	1	1	1
122	0		122	0		122	1		122	0		122	0		122	0		124	2	1	1	1
123	0		123	0		123	1		123	0		123	0		123	0		125	2	1	1	1
124	0		124	0		124	1		124	0		124	0		124	0		126	2	1	1	1
125	0		125	0		125	1		125	0		125	0		125	0		127	2	1	1	1
126	0		126	0		126	1		126	0		126	0		126	0		128	2	1	1	1
127	1		127	0		127	1		127	0		127	0		127	0		129	2	1	1	1
128	1		128	0		128	1		128	0		128	0		128	0		130	2	1	1	1
129	1		129	0		129	1		129	0		129	0		129	0		131	2	1	1	1
130	0		130	0		130	1		130	0		130	0		130	0		132	2	1	1	1
131	0		131	0		131	1		131	0		131	0		131	0		133	2	1	1	1
132	0		132	0		132	1		132	0		132	0		132	0		134	2	1	1	1
133	0		133	0		133	1		133	0		133	0		133	0		135	2	1	1	1
134	0		134	0		134	1		134	0		134	0		134	0		136	2	1	1	1
135	0		135	0		135	1		135	0		135	0		135	0		137	2	1	1	1
136	1		136	0		136	1		136	0		136	0		136	0		138	2	1	1	1
137	1		137	0		137	1		137	0		137	0		137	0		139	2	1	1	1
138	1		138	0		138	1		138	0		138	0		138	0		140	2	1	1	1
139	1		139	0		139	1		139	0		139	0		139	0		141	2	1	1	1
140	1		140	0		140	1		140	0		140	0		140	0		142	2	1	1	1
141	1		141	0		141	1		141	0		141	0		141	0		143	2	1	1	1
142	1		142	0		142	1		142	0		142	0		142	0		144	2	1	1	1
143	1		143	0		143	1		143	0		143	0		143	0		145	2	1	1	1
144	1		144	0		144	1		144	0		144	0		144	0		146	2	1	1	1
145	1		145	0		145	1		145	0		145	0		145	0		147	2	1	1	1
146	1		146	0		146	1		146	0		146	0		146	0		148	2	1	1	1
147	1		147	0		147	1		147	0		147	0		147	0		149	2	1	1	1
148	1		148	0		148	1		148	0		148	0		148	0		150	2	1	1	1
149	1		149	0		149	1		149	0		149	0		149	0		151	2	1	1	1
150	1		150	0		150	1		150	0		150	0		150	0		152	2	1	1	1
151	0		151	0		151	1		151	0		151	0		151	0		153	2	1	1	1
152	1		152	0		152	1		152	0		152	0		152	0		154	2	1	1	1
153	1		153	0		153	1		153	0		153	0		153	0		155	2	1	1	1
154	0		154	0		154	1		154	0		154	0		154	0		156	2	1	1	1
155	0		155	0		155	1		155	0		155	0		155	0		157	2	1	1	1
156	0		156	0		156	1		156	0		156	0		156	0		158	2	1	1	1
157	0		157	0		157	1		157	0		157	0		157	0		159	2	1	1	1
158	0		158	0		158	1		158	0		158	0		158	0		160	2	1	1	1
159	0		159	0		159	1		159	0		159	0		159	0		161	2	1	1	1
160	0		160	0		160	1		160	0		160	0		160	0		162	2	1	1	1
161	0		161	0		161	1		161	0		161	0		161	0		163	2	1	1	1
162	0		162	0		162	1		162	0		162	0		162	0		164	2	1	1	1
163	0		163	0		163	1		163	0		163	0		163	0		165	2	1	1	1
164	1		164	0		164	1		164	0		164	0		164	0		166	2	1	1	1
165	1		165	0		165	1		165	0		165	0		165	0		167	2	1	1	1
166	1		166	0		166	1		166	0		166	0		166	0		168	2	1	1	1
167	0		167	0		167	1		167	0		167	0		167	0		169	2	1	1	1
168	0		168	0		168	1		168	0		168	0		168	0		170	2	1	1	1
169	1		169	0		169	1		169	0		169	0		169	0		171	2	1	1	1
170	1		170	0		170	1		170	0		170	0		170	0		172	2	1	1	1
171	1		171	0		171	1		171	0		171	0		171	0		173	2	1	1	1
172	0		172	0		172	1		172	0		172	0		172	0		174	2	1	1	1
173	1		173	0		173	1		173	0		173	0		173	0		175	2	1	1	1
174	1		174	0		174	1		174	0		174	0		174	0		176	2	1	1	1
175	1		175	0		175	1		175	0		175	0		175	0		177	2	1	1	1
176	1		176	0		176	1		176	0		176	0		176	0		178	2	2	1	1
177	1		177	0		177	1		177	0		177	0		177	0		179	2	1	1	1
178	1		178	0		178	1		178	0		178	0		178	1		180	2	1	1	1
179	1		179	0		179	1		179	0		179	0		179	0		181	2	1	1	1
180	1		180	0		180	1		180	0		180	0		180	0		182	2	1	1	1
181	1		181	0		181	1		181	0		181	0		181	0		183	2	1	1	1
182	1		182	0		182	1		182	0		182	0		182	0		184	2	1	1	1
183	1		183	0		183	1		183	0		183	0		183	0		185	2	2	1	1
184	1		184	0		184	1		184	0		184	0		184	0		186	2	1	1	1
185	1		185	0		185	1		185	0		185	0		185	1		187	2	2	1	1
186	1		186	0		186	1		186	0		186	0		186	0		188	2	2	1	1
187	1		187	0		187	1		187	0		187	0		187	1		189	2	2	1	1
188	1		188	0		188	1		188	0		188	0		188	1		190	2	2	1	1
189	1		189	0		189	1		189	0		189	0		189	1		191	2	2	1	1
190	1		190	0		190	1		190	0		190	0		190	1		192	2	2	1	1
191	1		191	0		191	1		191	0		191	0		191	1		193	2	2	1	1
192	1		192	0		192	1		192	0		192	0		192	1		194	2	2	1	1
193	1		193	0		193	1		193	0		193	0		193	1		195	2	2	1	1
194	1		194	0		194	1		194	0		194	0		194	1		196	2	2	1	1
195	1		195	0		195	1		195	0		195	0		195	1		197	2	2	1	1
196	1		196	0		196	1		196	0		196	0		196	1		198	2	2	1	1
197	1		197	0		197	1		197	0		197	0		197	1		199	2	2	1	1
198	1		198	0		198	1		198	0		198	0		198	1		200	2	2	1	1
199	1		199	0		199	1		199	0		199	0		199	1		201	2	2	1	1
200	1		200	0		200	1		200	0		200	0		200	1		202	2	2	1	1
201	1		201	0		201	1		201	0		201	0		201	1		203	2	2	1	1
202	1		202	0		202	1		202	0		202	0		202	1		204	2	2	1	1
203	1		203	0		203	1		203	0		203	0		203	1		205	2	2	1	1
204	1		204	0		204	1		204	0		204	0		204	1		206	2	2	1	1
205	1		205	0		205	1		205	0		205	0		205	1		207	2	2	1	1
206	1		206	0		206	1		206	0		206	0		206	1		208	2	2	1	1
207	1		207	0		207	1		207	0		207	0		207	1		209	2	2	1	1
208	1		208	0		208	1		208	0		208	0		208	1		210	2	2	1	1
209	1		209	0		209	1		209	0		209	0		209	1		211	2	2	1	1
210	1		210	0		210	1		210	0		210	0		210	1		212	2	0	1	0
211	1		211	0		211	1		211	0		211	0		211	1		213	2	2	1	1
212	1		212	0		212	1		212	0		212	0		212	0		214	2	0	1	0
213	1		213	0		213	1		213	0		213	0		213	1		215	2	2	1	1
214	1		214	0		214	1		214	0		214	0		214	0		216	2	0	1	0
215	1		215	0		215	1		215	0		215	0		215	1		217	2	0	1	0
216	1		216	0		216	1		216	0		216	0		216	0		218	2	0	1	0
217	1		217	0		217	1		217	0		217	0		217	0		219	2	0	1	0
218	1		218	0		218	1		218	0		218	0		218	0		220	2	0	1	0
219	1		219	0		219	1		219	0		219	0		219	0		221	2	0	1	0
220	1		220	0		220	1		220	0		220	0		220	0		222	2	1	1	1
221	1		221	0		221	1		221	0		221	0		221	0		223	2	1	1	1
222	1		222	0		222	1		222	0		222	0		222	0		224	2	1	1	1
223	1		223	0		223	1		223	0		223	0		223	0		225	2	1	1	1
224	1		224	0		224	1		224	0		224	0		224	0		226	2	1	1	1
225	1		225	0		225	1		225	0		225	0		225	0		227	2	0	1	0
226	1		226	0		226	1		226	0		226	0		226	0		228	2	0	1	0
227	1		227	0		227	1		227	0		227	0		227	0		229	2	1	1	1
228	1		228	0		228	1		228	0		228	0		228	0		230	2	1	1	1
229	1		229	0		229	1		229	0		229	0		229	0		231	2	1	1	1
230	1		230	0		230	1		230	0		230	0		230	0		232	2	1	1	1
231	1		231	0		231	1		231	0		231	0		231	0		233	2	1	1	1
232	1		232	0		232	1		232	0		232	0		232	0		234	2	1	1	1
233	1		233	0		233	1		233	0		233	0		233	0		235	2	1	1	1
234	1		234	0		234	1		234	0		234	0		234	0		236	2	1	1	1
235	1		235	0		235	1		235	0		235	0		235	0		237	2	1	1	1
236	1		236	0		236	1		236	0		236	0		236	0		238	2	2	1	1
237	1		237	0		237	1		237	0		237	0		237	0		239	2	2	1	1
238	1		238	0		238	1		238	0		238	0		238	1		240	2	2	1	1
239	1		239	0		239	1		239	0		239	0		239	1		241	2	2	1	1
240	1		240	0		240	1		240	0		240	0		240	1		242	2	1	1	1
241	1		241	0		241	1		241	0		241	0		241	1		243	2	1	1	1
242	1		242	0		242	1		242	0		242	0		242	0		244	2	1	1	1
243	1		243	0		243	1		243	0		243	0		243	0		245	2	1	1	1
244	1		244	0		244	1		244	0		244	0		244	0		246	2	1	1	1
245	1		245	0		245	1		245	0		245	0		245	0		247	2	1	1	1
246	1		246	0		246	1		246	0		246	0		246	0		248	2	1	1	1
247	1		247	0		247	1		247	0		247	0		247	0		249	2	1	1	1
248	1		248	0		248	1		248	0		248	0		248	0		250	2	1	1	1
249	1		249	0		249	1		249	0		249	0		249	0		251	2	1	1	1
250	1		250	0		250	1		250	0		250	0		250	0		252	2	1	1	1
251	1		251	0		251	1		251	0		251	0		251	0		253	2	1	1	1
252	1		252	0		252	1		252	0		252	0		252	0		254	2	1	1	1
253	1		253	0		253	1		253	0		253	0		253	0		255	2	1	1	1
254	1		254	0		254	1		254	0		254	0		254	0		256	2	1	1	1
255	1		255	0		255	1		255	0		255	0		255	0		257	2	1	1	1
256	1		256	0		256	1		256	0		256	0		256	0		258	2	1	1	1
257	1		257	0		257	1		257	0		257	0		257	0		259	2	1	1	1
258	1		258	0		258	1		258	0		258	0		258	0		260	2	1	1	1
259	1		259	0		259	1		259	0		259	0		259	0		261	2	1	1	1
260	1		260	0		260	1		260	0		260	0		260	0		262	2	1	1	1
261	1		261	0		261	1		261	0		261	0		261	0		263	2	1	1	1
262	1		262	0		262	1		262	0		262	0		262	0		264	2	1	1	1
263	1		263	0		263	1		263	0		263	0		263	0		265	2	1	1	1
264	1		264	0		264	1		264	0		264	0		264	0		266	2	1	1	1
265	1		265	0		265	1		265	0		265	0		265	0		267	2	1	1	1
266	1		266	0		266	1		266	0		266	0		266	0		268	2	1	1	1
267	1		267	0		267	1		267	0		267	0		267	0		269	2	1	1	1
268	1		268	0		268	1		268	0		268	0		268	0		270	2	1	1	1
269	1		269	0		269	1		269	0		269	0		269	0		271	2	1	1	1
270	1		270	0		270	1		270	0		270	0		270	0		272	2	1	1	1
271	1		271	0		271	1		271	0		271	0		271	0		273	2	1	1	1
272	1		272	0		272	1		272	0		272	0		272	0		274	2	1	1	1
273	1		273	0		273	1		273	0		273	0		273	0		275	2	1	1	1
274	1		274	0		274	1		274	0		274	0		274	0		276	2	1	1	1
275	1		275	0		275	1		275	0		275	0		275	0		277	2	1	1	1
276	1		276	0		276	1		276	0		276	0		276	0		278	2	1	1	1
277	1		277	0		277	1		277	0		277	0		277	0		279	2	1	1	1
278	1		278	0		278	1		278	0		278	0		278	0		280	2	1	1	1
279	1		279	0		279	1		279	0		279	0		279	0		281	2	1	1	1
280	1		280	0		280	1		280	0		280	0		280	0		282	2	1	1	1
281	1		281	0		281	1		281	0		281	0		281	0		283	2	1	1	1
282	1		282	0		282	1		282	0		282	0		282	0		284	2	1	1	1
283	1		283	0		283	1		283	0		283	0		283	0		285	2	1	1	1
284	1		284	0		284	1		284	0		284	0		284	0		286	2	1	1	1
285	1		285	0		285	1		285	0		285	0		285	0		287	2	1	1	1
286	1		286	0		286	1		286	0		286	0		286	0		288	2	1	1	1
287	1		287	0		287	1		287	0		287	0		287	0		289	2	1	1	1
288	1		288	0		288	1		288	0		288	0		288	0		290	2	1	1	1
289	1		289	0		289	1		289	0		289	0		289	0		291	2	1	1	1
290	1		290	0		290	1		290	0		290	0		290	0		292	2	0	1	0
291	1		291	0		291	1		291	0		291	0		291	0		293	2	1	1	1
292	1		292	0		292	1		292	0		292	0		292	0		294	2	2	1	1
293	1		293	0		293	1		293	0		293	0		293	0		295	2	2	1	1
294	1		294	0		294	1		294	0		294	0		294	1		296	2	1	1	1
295	1		295	0		295	1		295	0		295	0		295	1		297	2	2	1	1
296	1		296	0		296	1		296	0		296	0		296	0		298	2	0	1	0
297	1		297	0		297	1		297	0		297	0		297	1		299	2	1	1	1
298	1		298	0		298	1		298	0		298	0		298	1		300	1	0	1	0
299	1		299	0		299	1		299	0		299	0		299	0		301	2	0	1	0
300	1		300	0		300	0		300	0		300	0		300	0		302	2	0	1	0
301	1		301	0		301	1		301	0		301	0		301	0		303	2	1	1	1
302	1		302	0		302	1		302	0		302	0		302	0		304	2	1	1	1
303	1		303	0		303	1		303	0		303	0		303	0		305	2	1	1	1
304	1		304	0		304	1		304	0		304	0		304	0		306	2	1	1	1
305	1		305	0		305	1		305	0		305	0		305	0		307	2	1	1	1
306	1		306	0		306	1		306	0		306	0		306	0		308	2	0	1	0
307	1		307	0		307	1		307	0		307	0		307	0		309	2	0	1	0
308	1		308	0		308	1		308	0		308	0		308	0		310	2	0	1	0
309	1		309	0		309	1		309	0		309	0		309	0		311	2	0	1	0
310	1		310	0		310	1		310	0		310	0		310	0		312	2	0	1	0
311	1		311	0		311	1		311	0		311	0		311	0		313	2	0	1	0
312	1		312	0		312	1		312	0		312	0		312	0		314	2	0	1	0
313	1		313	0		313	1		313	0		313	0		313	0		315	2	0	1	0
314	1		314	0		314	1		314	0		314	0		314	0		316	2	0	1	0
315	1		315	0		315	1		315	0		315	0		315	0		317	2	0	1	0
316	1		316	0		316	1		316	0		316	0		316	0		318	2	0	1	0
317	1		317	0		317	1		317	0		317	0		317	0		319	2	0	1	0
318	1		318	0		318	1		318	0		318	0		318	0		320	2	0	1	0
319	1		319	0		319	1		319	0		319	0		319	0		321	2	0	1	0
320	1		320	0		320	1		320	0		320	0		320	0		322	2	0	1	0
321	1		321	0		321	1		321	0		321	0		321	0		323	2	0	1	0
322	1		322	0		322	1		322	0		322	0		322	0		324	2	0	1	0
323	1		323	0		323	1		323	0		323	0		323	0		325	2	0	1	0
324	1		324	0		324	1		324	0		324	0		324	0		326	2	0	1	0
325	1		325	0		325	1		325	0		325	0		325	0		327	2	0	1	0
326	1		326	0		326	1		326	0		326	0		326	0		328	2	0	1	0
327	1		327	0		327	1		327	0		327	0		327	0		329	2	0	1	0
328	1		328	0		328	1		328	0		328	0		328	0		330	2	0	1	0
329	1		329	0		329	1		329	0		329	0		329	0		331	2	1	1	1
330	1		330	0		330	1		330	0		330	0		330	0		332	2	1	1	1
331	1		331	0		331	1		331	0		331	0		331	0		333	2	1	1	1
332	1		332	0		332	1		332	0		332	0		332	0		334	2	1	1	1
333	1		333	0		333	1		333	0		333	0		333	0		335	2	1	1	1
334	1		334	0		334	1		334	0		334	0		334	0		336	2	1	1	1
335	1		335	0		335	1		335	0		335	0		335	0		337	2	1	1	1
336	1		336	0		336	1		336	0		336	0		336	0		338	2	1	1	1
337	1		337	0		337	1		337	0		337	0		337	0		339	2	1	1	1
338	1		338	0		338	1		338	0		338	0		338	0		340	2	1	1	1
339	1		339	0		339	1		339	0		339	0		339	0		341	2	1	1	1
340	1		340	0		340	1		340	0		340	0		340	0		342	2	1	1	1
341	1		341	0		341	1		341	0		341	0		341	0		343	2	1	1	1
342	1		342	0		342	1		342	0		342	0		342	0		344	2	1	1	1
343	1		343	0		343	1		343	0		343	0		343	0		345	2	1	1	1
344	1		344	0		344	1		344	0		344	0		344	0		346	2	1	1	1
345	1		345	0		345	1		345	0		345	0		345	0		347	2	1	1	1
346	1		346	0		346	1		346	0		346	0		346	0		348	2	1	1	1
347	1		347	0		347	1		347	0		347	0		347	0		349	2	1	1	1
348	1		348	0		348	1		348	0		348	0		348	0		350	2	1	1	1
349	1		349	0		349	1		349	0		349	0		349	0		351	2	1	1	1
350	1		350	0		350	1		350	0		350	0		350	0		352	2	1	1	1
351	1		351	0		351	1		351	0		351	0		351	0		353	2	1	1	1
352	1		352	0		352	1		352	0		352	0		352	0		354	2	1	1	1
353	1		353	0		353	1		353	0		353	0		353	0		355	2	1	1	1
354	1		354	0		354	1		354	0		354	0		354	0		356	2	1	1	1
355	1		355	0		355	1		355	0		355	0		355	0		357	2	0	1	0
356	1		356	0		356	1		356	0		356	0		356	0		358	2	0	1	0
357	1		357	0		357	1		357	0		357	0		357	0		359	2	0	1	0
358	1		358	0		358	1		358	0		358	0		358	0		360	2	0	1	0
359	1		359	0		359	1		359	0		359	0		359	0		361	2	0	1	0
360	1		360	0		360	1		360	0		360	0		360	0		362	2	0	1	0
361	1		361	0		361	1		361	0		361	0		361	0		363	2	0	1	0
362	1		362	0		362	1		362	0		362	0		362	0		364	2	0	1	0
363	1		363	0		363	1		363	0		363	0		363	0		365	0	0	0	0
364	1		364	0		364	1		364	0		364	0		364	0		366	2	0	1	0
365	1		365	0		365	0		365	0		365	0		365	0		367	2	0	1	0
366	1		366	0		366	1		366	0		366	0		366	0		368	2	0	1	0
367	1		367	0		367	1		367	0		367	0		367	0		369	2	0	1	0
368	0		368	0		368	1		368	0		368	0		368	0		370	3	0	1	0
369	0		369	0		369	1		369	0		369	0		369	0		371	2	0	1	0
370	2		370	0		370	1		370	0		370	0		370	0		372	2	0	1	0
371	0		371	0		371	1		371	0		371	0		371	0		373	3	0	1	0
372	0		372	0		372	1		372	0		372	0		372	0		374	3	0	0	0
373	2		373	0		373	1		373	0		373	0		373	0		375	3	0	0	0
374	2		374	0		374	0		374	0		374	0		374	0		376	3	0	0	0
375	2		375	0		375	0		375	0		375	0		375	0		377	3	0	0	0
376	2		376	0		376	0		376	0		376	0		376	0		378	3	0	0	0
377	2		377	0		377	0		377	0		377	0		377	0		379	3	0	1	0
378	2		378	0		378	0		378	0		378	0		378	0		380	3	0	1	0
379	2		379	0		379	1		379	0		379	0		379	0		381	3	0	1	0
380	2		380	0		380	1		380	0		380	0		380	0		382	3	0	1	0
381	2		381	0		381	1		381	0		381	0		381	0		383	3	0	1	0
382	2		382	0		382	1		382	0		382	0		382	0		384	3	0	1	0
383	2		383	0		383	1		383	0		383	0		383	0		385	3	0	1	0
384	2		384	0		384	1		384	0		384	0		384	0		386	3	0	1	0
385	2		385	0		385	1		385	0		385	0		385	0		387	3	0	1	0
386	2		386	0		386	1		386	0		386	0		386	0		388	3	0	1	0
387	2		387	0		387	1		387	0		387	0		387	0		389	3	0	1	0
388	2		388	0		388	1		388	0		388	0		388	0		390	3	0	1	0
389	2		389	0		389	1		389	0		389	0		389	0		391	3	0	0	0
390	2		390	0		390	1		390	0		390	0		390	0		392	3	0	1	0
391	2		391	0		391	0		391	0		391	0		391	0		393	3	0	1	0
392	2		392	0		392	0		392	0		392	0		392	0		394	3	0	0	0
393	2		393	0		393	0		393	0		393	0		393	0		395	0	0	0	0
394	2		394	0		394	0		394	0		394	0		394	0		396	0	0	0	0
395	0		395	0		395	0		395	0		395	0		395	0		397	0	0	0	0
396	0		396	0		396	0		396	0		396	0		396	0		398	3	0	0	0
397	0		397	0		397	0		397	0		397	0		397	0		399	0	0	0	0
398	2		398	0		398	0		398	0		398	0		398	0		400	0	0	0	0
399	0		399	0		399	0		399	0		399	0		399	0		401	3	0	0	0
400	0		400	0		400	0		400	0		400	0		400	0		402	3	0	1	0
401	2		401	0		401	0		401	0		401	0		401	0		403	3	0	1	0
402	2		402	0		402	1		402	0		402	0		402	0		404	3	0	1	0
403	2		403	0		403	0		403	0		403	0		403	0		405	3	0	1	0
404	2		404	0		404	0		404	0		404	0		404	0		406	3	0	1	0
405	2		405	0		405	0		405	0		405	0		405	0		407	1	0	1	0
406	2		406	0		406	0		406	0		406	0		406	0		408	3	0	1	0
407	0		407	0		407	0		407	0		407	0		407	0		409	3	0	1	0
408	2		408	0		408	0		408	0		408	0		408	0		410	3	0	0	0
409	2		409	0		409	1		409	0		409	0		409	0		411	3	0	0	0
410	2		410	0		410	0		410	0		410	0		410	0		412	0	0	0	0
411	2		411	0		411	0		411	0		411	0		411	0		413	3	0	1	0
412	0		412	0		412	0		412	0		412	0		412	0		414	3	0	1	0
413	2		413	0		413	0		413	0		413	0		413	0		415	3	0	1	0
414	2		414	0		414	0		414	0		414	0		414	0		416	3	0	1	0
415	2		415	0		415	0		415	0		415	0		415	0		417	3	0	1	0
416	2		416	0		416	0		416	0		416	0		416	0		418	3	0	1	0
417	2		417	0		417	0		417	0		417	0		417	0		419	3	0	1	0
418	2		418	0		418	0		418	0		418	0		418	0		420	0	0	0	0
419	2		419	0		419	0		419	0		419	0		419	0		421	3	0	0	0
420	0		420	0		420	0		420	0		420	0		420	0		422	3	0	0	0
421	2		421	0		421	0		421	0		421	0		421	0		423	3	0	0	0
422	2		422	0		422	0		422	0		422	0		422	0		424	3	0	0	0
423	2		423	0		423	0		423	0		423	0		423	0		425	0	0	0	0
424	2		424	0		424	0		424	0		424	0		424	0		426	0	0	0	0
425	0		425	0		425	0		425	0		425	0		425	0		427	0	0	0	0
426	0		426	0		426	0		426	0		426	0		426	0		428	0	0	0	0
427	0		427	0		427	0		427	0		427	0		427	0		429	0	0	0	0
428	0		428	0		428	0		428	0		428	0		428	0		430	0	0	0	0
429	0		429	0		429	0		429	0		429	0		429	0		431	0	0	0	0
430	0		430	0		430	0		430	0		430	0		430	0		432	0	0	0	0
431	0		431	0		431	0		431	0		431	0		431	0		433	0	0	0	0
432	0		432	0		432	0		432	0		432	0		432	0		434	0	0	0	0
433	0		433	0		433	0		433	0		433	0		433	0		435	0	0	0	0
434	0		434	0		434	0		434	0		434	0		434	0		436	0	0	0	0
435	0		435	0		435	0		435	0		435	0		435	0		437	0	0	0	0
436	0		436	0		436	0		436	0		436	0		436	0		438	0	0	0	0
437	0		437	0		437	0		437	0		437	0		437	0		439	3	0	1	0
438	0		438	0		438	1		438	0		438	0		438	0		440	3	0	1	0
439	2		439	0		439	0		439	0		439	0		439	0		441	3	1	1	1
440	2		440	0		440	0		440	0		440	0		440	0		442	3	1	1	1
441	2		441	0		441	0		441	0		441	0		441	0		443	3	1	1	1
442	2		442	0		442	0		442	0		442	0		442	0		444	3	1	1	1
443	2		443	0		443	0		443	0		443	0		443	0		445	0	1	0	1
444	2		444	0		444	0		444	0		444	0		444	0		446	3	1	1	1
445	0		445	0		445	0		445	0		445	0		445	0		447	3	1	1	1
446	2		446	0		446	0		446	0		446	0		446	0		448	3	1	1	1
447	2		447	0		447	0		447	0		447	0		447	0		449	3	1	0	1
448	2		448	0		448	0		448	0		448	0		448	0		450	0	1	0	1
449	2		449	0		449	0		449	0		449	0		449	0		451	0	1	0	1
450	0		450	0		450	0		450	0		450	0		450	0		452	0	1	0	1
451	0		451	0		451	0		451	0		451	0		451	0		453	0	1	0	1
452	0		452	0		452	0		452	0		452	0		452	0		454	0	0	0	0
453	0		453	0		453	0		453	0		453	0		453	0		455	0	0	0	0
454	0		454	0		454	0		454	0		454	0		454	0		456	0	0	0	0
455	0		455	0		455	0		455	0		455	0		455	0		457	0	0	0	0
456	0		456	0		456	0		456	0		456	0		456	0		458	0	1	0	1
457	0		457	0		457	0		457	0		457	0		457	0		459	0	1	0	1
458	0		458	0		458	0		458	0		458	0		458	0		460	0	1	0	1
459	0		459	0		459	0		459	0		459	0		459	0		461	0	1	0	1
460	0		460	0		460	0		460	0		460	0		460	0		462	0	1	0	1
461	0		461	0		461	0		461	0		461	0		461	0		463	0	1	0	1
462	0		462	0		462	0		462	0		462	0		462	0		464	0	0	0	0
463	0		463	0		463	0		463	0		463	0		463	0		465	0	0	0	0
464	0		464	0		464	0		464	0		464	0		464	0		466	0	0	0	0
465	0		465	0		465	0		465	0		465	0		465	0		467	0	0	0	0
466	0		466	0		466	0		466	0		466	0		466	0		468	0	0	0	0
467	0		467	0		467	0		467	0		467	0		467	0		469	0	0	0	0
468	0		468	0		468	0		468	0		468	0		468	0		470	0	0	0	0
469	0		469	0		469	0		469	0		469	0		469	0		471	0	0	0	0
470	0		470	0		470	0		470	0		470	0		470	0		472	0	0	0	0
471	0		471	0		471	0		471	0		471	0		471	0		473	0	0	0	0
472	0		472	0		472	0		472	0		472	0		472	0		474	0	0	0	0
473	0		473	0		473	0		473	0		473	0		473	0		475	0	0	0	0
474	0		474	0		474	0		474	0		474	0		474	0		476	0	0	0	0
475	0		475	0		475	0		475	0		475	0		475	0		477	0	0	0	0
476	0		476	0		476	0		476	0		476	0		476	0		478	0	0	0	0
477	0		477	0		477	0		477	0		477	0		477	0		479	0	0	0	0
478	0		478	0		478	0		478	0		478	0		478	0		480	0	0	0	0
479	0		479	0		479	0		479	0		479	0		479	0		481	0	0	0	0
480	0		480	0		480	0		480	0		480	0		480	0		482	0	0	0	0
481	0		481	0		481	0		481	0		481	0		481	0		483	0	0	0	0
482	0		482	0		482	0		482	0		482	0		482	0		484	0	0	0	0
483	0		483	0		483	0		483	0		483	0		483	0		485	0	0	0	0
484	0		484	0		484	0		484	0		484	0		484	0		486	0	0	0	0
485	0		485	0		485	0		485	0		485	0		485	0		487	0	0	0	0
486	0		486	0		486	0		486	0		486	0		486	0		488	0	0	0	0
487	0		487	0		487	0		487	0		487	0		487	0		489	0	0	0	0
488	0		488	0		488	0		488	0		488	0		488	0		490	0	0	0	0
489	0		489	0		489	0		489	0		489	0		489	0		491	0	0	0	0
490	0		490	0		490	0		490	0		490	0		490	0		492	0	0	0	0
491	0		491	0		491	0		491	0		491	0		491	0		493	0	0	0	0
492	0		492	0		492	0		492	0		492	0		492	0		494	0	0	0	0
493	0		493	0		493	0		493	0		493	0		493	0		495	0	0	0	0
494	0		494	0		494	0		494	0		494	0		494	0		496	0	0	0	0
495	0		495	0		495	0		495	0		495	0		495	0		497	0	0	0	0
496	0		496	0		496	0		496	0		496	0		496	0		498	0	0	0	0
497	0		497	0		497	0		497	0		497	0		497	0		499	0	0	0	0
498	0		498	0		498	0		498	0		498	0		498	0		500	0	0	0	0
499	0		499	0		499	0		499	0		499	0		499	0		501	0	0	0	0
500	0		500	0		500	0		500	0		500	0		500	0		502	0	0	0	0
501	0		501	0		501	0		501	0		501	0		501	0		503	0	0	0	0
502	0		502	0		502	0		502	0		502	0		502	0		504	0	0	0	0
503	0		503	0		503	0		503	0		503	0		503	0		505	0	0	0	0
504	0		504	0		504	0		504	0		504	0		504	0		506	0	0	0	0
505	0		505	0		505	0		505	0		505	0		505	0		507	0	0	0	0
506	0		506	0		506	0		506	0		506	0		506	0		508	0	0	0	0
507	0		507	0		507	0		507	0		507	0		507	0		509	0	0	0	0
508	0		508	0		508	0		508	0		508	0		508	0		510	0	0	0	0
509	0		509	0		509	0		509	0		509	0		509	0		511	0	0	0	0
510	0		510	0		510	0		510	0		510	0		510	0		512	0	1	0	1
511	0		511	0		511	0		511	0		511	0		511	0		513	0	1	0	1
512	0		512	0		512	0		512	0		512	0		512	0		514	0	1	0	1
513	0		513	0		513	0		513	0		513	0		513	0		515	0	1	0	1
514	0		514	0		514	0		514	0		514	0		514	0		516	0	0	0	0
515	0		515	0		515	0		515	0		515	0		515	0		517	0	0	0	0
516	0		516	0		516	0		516	0		516	0		516	0		518	0	0	0	0
517	0		517	0		517	0		517	0		517	0		517	0		519	0	0	0	0
518	0		518	0		518	0		518	0		518	0		518	0		520	0	0	0	0
519	0		519	0		519	0		519	0		519	0		519	0		521	0	0	0	0
520	0		520	0		520	0		520	0		520	0		520	0		522	0	0	0	0
521	0		521	0		521	0		521	0		521	0		521	0		523	0	0	0	0
522	0		522	0		522	0		522	0		522	0		522	0		524	0	0	0	0
523	0		523	0		523	0		523	0		523	0		523	0		525	0	0	0	0
524	0		524	0		524	0		524	0		524	0		524	0		526	0	0	0	0
525	0		525	0		525	0		525	0		525	0		525	0		527	0	0	0	0
526	0		526	0		526	0		526	0		526	0		526	0		528	0	0	0	0
527	0		527	0		527	0		527	0		527	0		527	0		529	0	0	0	0
528	0		528	0		528	0		528	0		528	0		528	0		530	0	0	0	0
529	0		529	0		529	0		529	0		529	0		529	0		531	0	0	0	0
530	0		530	0		530	0		530	0		530	0		530	0		532	0	0	0	0
531	0		531	0		531	0		531	0		531	0		531	0		533	0	0	0	0
532	0		532	0		532	0		532	0		532	0		532	0		534	0	0	0	0
533	0		533	0		533	0		533	0		533	0		533	0		535	0	0	0	0
534	0		534	0		534	0		534	0		534	0		534	0		536	0	0	0	0
535	0		535	0		535	0		535	0		535	0		535	0		537	0	0	0	0
536	0		536	0		536	0		536	0		536	0		536	0		538	0	0	0	0
537	0		537	0		537	0		537	0		537	0		537	0		539	0	0	0	0
538	0		538	0		538	0		538	0		538	0		538	0		540	0	0	0	0
539	0		539	0		539	0		539	0		539	0		539	0		541	0	0	0	0
540	0		540	0		540	0		540	0		540	0		540	0		542	0	0	0	0
541	0		541	0		541	0		541	0		541	0		541	0		543	0	0	0	0
542	0		542	0		542	0		542	0		542	0		542	0		544	0	0	0	0
543	0		543	0		543	0		543	0		543	0		543	0		545	0	0	0	0
544	0		544	0		544	0		544	0		544	0		544	0		546	0	0	0	0
545	0		545	0		545	0		545	0		545	0		545	0		547	0	0	0	0
546	0		546	0		546	0		546	0		546	0		546	0		548	0	0	0	0
547	0		547	0		547	0		547	0		547	0		547	0		549	0	0	0	0
548	0		548	0		548	0		548	0		548	0		548	0		550	0	0	0	0
549	0		549	0		549	0		549	0		549	0		549	0		551	0	0	0	0
550	0		550	0		550	0		550	0		550	0		550	0		552	0	0	0	0
551	0		551	0		551	0		551	0		551	0		551	0		553	0	0	0	0
552	0		552	0		552	0		552	0		552	0		552	0		554	0	0	0	0
553	0		553	0		553	0		553	0		553	0		553	0		555	0	0	0	0
554	0		554	0		554	0		554	0		554	0		554	0		556	0	0	0	0
555	0		555	0		555	0		555	0		555	0		555	0		557	0	0	0	0
556	0		556	0		556	0		556	0		556	0		556	0		558	0	0	0	0
557	0		557	0		557	0		557	0		557	0		557	0		559	0	0	0	0
558	0		558	0		558	0		558	0		558	0		558	0		560	0	0	0	0
559	0		559	0		559	0		559	0		559	0		559	0		561	0	0	0	0
560	0		560	0		560	0		560	0		560	0		560	0		562	0	0	0	0
561	0		561	0		561	0		561	0		561	0		561	0		563	0	0	0	0
562	0		562	0		562	0		562	0		562	0		562	0		564	0	0	0	0
563	0		563	0		563	0		563	0		563	0		563	0		565	0	0	0	0
564	0		564	0		564	0		564	0		564	0		564	0		566	0	0	0	0
565	0		565	0		565	0		565	0		565	0		565	0		567	0	0	0	0
566	0		566	0		566	0		566	0		566	0		566	0		568	0	0	0	0
567	0		567	0		567	0		567	0		567	0		567	0		569	0	0	0	0
568	0		568	0		568	0		568	0		568	0		568	0		570	0	0	0	0
569	0		569	0		569	0		569	0		569	0		569	0		571	0	0	0	0
570	0		570	0		570	0		570	0		570	0		570	0		572	0	0	0	0
571	0		571	0		571	0		571	0		571	0		571	0		573	0	0	0	0
572	0		572	0		572	0		572	0		572	0		572	0		574	0	1	0	1
573	0		573	0		573	0		573	0		573	0		573	0		575	0	1	0	1
574	0		574	0		574	0		574	0		574	0		574	0		576	0	1	0	1
575	0		575	0		575	0		575	0		575	0		575	0		577	0	1	0	1
576	0		576	0		576	0		576	0		576	0		576	0		578	0	1	0	1
577	0		577	0		577	0		577	0		577	0		577	0		579	0	1	0	1
578	0		578	0		578	0		578	0		578	0		578	0		580	0	1	0	1
579	0		579	0		579	0		579	0		579	0		579	0		581	0	1	0	1
580	0		580	0		580	0		580	0		580	0		580	0		582	0	1	0	1
581	0		581	0		581	0		581	0		581	0		581	0		583	0	1	0	1
582	0		582	0		582	0		582	0		582	0		582	0		584	0	1	0	1
583	0		583	0		583	0		583	0		583	0		583	0		585	0	1	0	1
584	0		584	0		584	0		584	0		584	0		584	0		586	0	0	0	0
585	0		585	0		585	0		585	0		585	0		585	0		587	0	0	0	0
586	0		586	0		586	0		586	0		586	0		586	0		588	0	0	0	0
587	0		587	0		587	0		587	0		587	0		587	0		589	0	0	0	0
588	0		588	0		588	0		588	0		588	0		588	0		590	0	0	0	0
589	0		589	0		589	0		589	0		589	0		589	0		591	0	0	0	0
590	0		590	0		590	0		590	0		590	0		590	0		592	0	0	0	0
591	0		591	0		591	0		591	0		591	0		591	0		593	0	0	0	0
592	0		592	0		592	0		592	0		592	0		592	0		594	0	0	0	0
593	0		593	0		593	0		593	0		593	0		593	0		595	0	0	0	0
594	0		594	0		594	0		594	0		594	0		594	0		596	0	0	0	0
595	0		595	0		595	0		595	0		595	0		595	1		597	0	0	0	0
596	0		596	0		596	0		596	0		596	0		596	1		598	0	0	0	0
597	0		597	0		597	0		597	0		597	0		597	0		599	0	0	0	0
598	0		598	0		598	0		598	0		598	0		598	0		600	0	0	0	0
599	0		599	0		599	0		599	0		599	0		599	0		601	0	0	0	0
600	0		600	0		600	0		600	0		600	0		600	0		602	0	2	0	1
601	0		601	0		601	0		601	0		601	0		601	1		603	0	2	0	1
602	0		602	0		602	0		602	0		602	0		602	1		604	0	2	0	1
603	0		603	0		603	0		603	0		603	0		603	1		605	0	2	0	1
604	0		604	0		604	0		604	0		604	0		604	1		606	0	2	0	1
605	0		605	0		605	0		605	0		605	0		605	1		607	0	2	0	1
606	0		606	0		606	0		606	0		606	0		606	1		608	0	2	0	1
607	0		607	0		607	0		607	0		607	0		607	1		609	0	2	0	1
608	0		608	0		608	0		608	0		608	0		608	1		610	0	2	0	1
609	0		609	0		609	0		609	1		609	1		609	1		611	0	2	0	1
610	0		610	0		610	0		610	0		610	0		610	1		612	0	2	0	1
611	0		611	0		611	0		611	0		611	0		611	1		613	0	2	0	1
612	0		612	0		612	0		612	0		612	0		612	1		614	0	2	0	1
613	0		613	0		613	0		613	0		613	0		613	1		615	0	2	0	1
614	0		614	0		614	0		614	0		614	0		614	1		616	0	2	0	1
615	0		615	0		615	0		615	0		615	0		615	1		617	0	2	0	1
616	0		616	0		616	0		616	0		616	0		616	1		618	0	2	0	1
617	0		617	0		617	0		617	0		617	0		617	1		619	0	2	0	1
618	0		618	0		618	0		618	0		618	0		618	1		620	0	2	0	1
619	0		619	0		619	0		619	0		619	0		619	1		621	0	0	0	0
620	0		620	0		620	0		620	0		620	0		620	1		622	0	2	0	1
621	0		621	0		621	0		621	0		621	0		621	0		623	0	2	0	1
622	0		622	0		622	0		622	0		622	0		622	1		624	0	2	0	1
623	0		623	0		623	0		623	0		623	0		623	1		625	0	2	0	1
624	0		624	0		624	0		624	0		624	0		624	1		626	0	2	0	1
625	0		625	0		625	0		625	0		625	0		625	1		627	0	2	0	1
626	0		626	0		626	0		626	0		626	0		626	1		628	0	2	0	1
627	0		627	0		627	0		627	0		627	0		627	1		629	0	2	0	1
628	0		628	0		628	0		628	0		628	0		628	1		630	0	2	0	1
629	0		629	0		629	0		629	0		629	0		629	1		631	0	2	0	1
630	0		630	0		630	0		630	0		630	0		630	1		632	0	0	0	0
631	0		631	0		631	0		631	0		631	0		631	1		633	0	2	0	1
632	0		632	0		632	0		632	0		632	0		632	0		634	0	2	0	1
633	0		633	0		633	0		633	0		633	0		633	1		635	0	2	0	1
634	0		634	0		634	0		634	0		634	0		634	1		636	0	2	0	1
635	0		635	0		635	0		635	0		635	0		635	1		637	0	2	0	1
636	0		636	0		636	0		636	0		636	0		636	1		638	0	2	0	1
637	0		637	0		637	0		637	0		637	0		637	1		639	0	2	0	1
638	0		638	0		638	0		638	0		638	0		638	1		640	0	2	0	1
639	0		639	0		639	0		639	0		639	0		639	1		641	0	2	0	1
640	0		640	0		640	0		640	0		640	0		640	1		642	0	2	0	1
641	0		641	0		641	0		641	0		641	0		641	1		643	0	2	0	1
642	0		642	0		642	0		642	0		642	0		642	1		644	0	2	0	1
643	0		643	0		643	0		643	0		643	0		643	1		645	0	2	0	1
644	0		644	0		644	0		644	0		644	0		644	1		646	0	2	0	1
645	0		645	0		645	0		645	0		645	0		645	1		647	0	2	0	1
646	0		646	0		646	0		646	0		646	0		646	1		648	0	2	0	1
647	0		647	0		647	0		647	0		647	0		647	1		649	0	2	0	1
648	0		648	0		648	0		648	0		648	0		648	1		650	0	2	0	1
649	0		649	0		649	0		649	0		649	0		649	1		651	0	2	0	1
650	0		650	0		650	0		650	0		650	0		650	1		652	0	2	0	1
651	0		651	0		651	0		651	0		651	0		651	1		653	0	2	0	1
652	0		652	0		652	0		652	0		652	0		652	1		654	0	2	0	1
653	0		653	0		653	0		653	0		653	0		653	1		655	0	2	0	1
654	0		654	0		654	0		654	0		654	0		654	1		656	0	2	0	1
655	0		655	0		655	0		655	0		655	0		655	1		657	0	2	0	1
656	0		656	0		656	0		656	0		656	0		656	1		658	0	2	0	1
657	0		657	0		657	0		657	0		657	0		657	1		659	0	2	0	1
658	0		658	0		658	0		658	0		658	0		658	1		660	0	2	0	1
659	0		659	0		659	0		659	0		659	0		659	1		661	0	2	0	1
660	0		660	0		660	0		660	1		660	1		660	1		662	0	2	0	1
661	0		661	0		661	0		661	0		661	0		661	1		663	0	2	0	1
662	0		662	0		662	0		662	0		662	0		662	1		664	0	2	0	1
663	0		663	0		663	0		663	0		663	0		663	1		665	0	2	0	1
664	0		664	0		664	0		664	0		664	0		664	1		666	0	2	0	1
665	0		665	0		665	0		665	0		665	0		665	1		667	0	2	0	1
666	0		666	0		666	0		666	0		666	0		666	1		668	0	2	0	1
667	0		667	0		667	0		667	0		667	0		667	1		669	0	2	0	1
668	0		668	0		668	0		668	0		668	0		668	1		670	0	2	0	1
669	0		669	0		669	0		669	0		669	0		669	1		671	0	2	0	1
670	0		670	0		670	0		670	0		670	0		670	1		672	0	2	0	1
671	0		671	0		671	0		671	0		671	0		671	1		673	0	2	0	1
672	0		672	0		672	0		672	0		672	0		672	1		674	0	2	0	1
673	0		673	0		673	0		673	0		673	0		673	1		675	0	2	0	1
674	0		674	0		674	0		674	0		674	0		674	1		676	0	2	0	1
675	0		675	0		675	0		675	0		675	0		675	1		677	0	2	0	1
676	0		676	0		676	0		676	0		676	0		676	1		678	0	2	0	1
677	0		677	0		677	0		677	0		677	0		677	1		679	0	2	0	1
678	0		678	0		678	0		678	0		678	0		678	1		680	0	0	0	0
679	0		679	0		679	0		679	0		679	0		679	1		681	0	0	0	0
680	0		680	0		680	0		680	0		680	0		680	0		682	0	0	0	0
681	0		681	0		681	0		681	0		681	0		681	0		683	0	0	0	0
682	0		682	0		682	0		682	0		682	0		682	0		684	0	0	0	0
683	0		683	0		683	0		683	0		683	0		683	0		685	0	0	0	0
684	0		684	0		684	0		684	0		684	0		684	0		686	0	2	0	1
685	0		685	0		685	0		685	0		685	0		685	0		687	0	2	0	1
686	0		686	0		686	0		686	0		686	0		686	1		688	0	2	0	1
687	0		687	0		687	0		687	0		687	0		687	1		689	0	2	0	1
688	0		688	0		688	0		688	0		688	0		688	1		690	0	2	0	1
689	0		689	0		689	0		689	1		689	1		689	1		691	0	2	0	1
690	0		690	0		690	0		690	1		690	1		690	1		692	0	2	0	1
691	0		691	0		691	0		691	1		691	1		691	1		693	0	2	0	1
692	0		692	0		692	0		692	1		692	1		692	1		694	0	2	0	1
693	0		693	0		693	0		693	1		693	1		693	1		695	0	2	0	1
694	0		694	0		694	0		694	1		694	1		694	1		696	0	2	0	1
695	0		695	0		695	0		695	1		695	1		695	1		697	0	2	0	1
696	0		696	0		696	0		696	0		696	0		696	1		698	0	2	0	1
697	0		697	0		697	0		697	0		697	0		697	1		699	0	2	0	1
698	0		698	0		698	0		698	0		698	0		698	1		700	0	2	0	1
699	0		699	0		699	0		699	0		699	0		699	1		701	0	2	0	1
700	0		700	0		700	0		700	0		700	0		700	1		702	0	2	0	1
701	0		701	0		701	0		701	0		701	0		701	1		703	0	2	0	1
702	0		702	0		702	0		702	0		702	0		702	1		704	0	2	0	1
703	0		703	0		703	0		703	0		703	0		703	1		705	0	2	0	1
704	0		704	0		704	0		704	0		704	0		704	1		706	0	2	0	1
705	0		705	0		705	0		705	0		705	0		705	1		707	0	2	0	1
706	0		706	0		706	0		706	0		706	0		706	1		708	0	2	0	1
707	0		707	0		707	0		707	0		707	0		707	1		709	0	2	0	1
708	0		708	0		708	0		708	0		708	0		708	1		710	0	2	0	1
709	0		709	0		709	0		709	0		709	0		709	1		711	0	2	0	1
710	0		710	0		710	0		710	0		710	0		710	1		712	0	2	0	1
711	0		711	0		711	0		711	0		711	0		711	1		713	0	2	0	1
712	0		712	0		712	0		712	0		712	0		712	1		714	0	2	0	1
713	0		713	0		713	0		713	0		713	0		713	1		715	0	2	0	1
714	0		714	0		714	0		714	0		714	0		714	1		716	0	2	0	1
715	0		715	0		715	0		715	0		715	0		715	1		717	0	2	0	1
716	0		716	0		716	0		716	0		716	0		716	1		718	0	2	0	1
717	0		717	0		717	0		717	0		717	0		717	1		719	0	2	0	1
718	0		718	0		718	0		718	0		718	0		718	1		720	0	2	0	1
719	0		719	0		719	0		719	0		719	0		719	1		721	0	2	0	1
720	0		720	0		720	0		720	0		720	0		720	1		722	0	2	0	1
721	0		721	0		721	0		721	0		721	0		721	1		723	0	2	0	1
722	0		722	0		722	0		722	0		722	0		722	1		724	0	2	0	1
723	0		723	0		723	0		723	1		723	1		723	1		725	0	2	0	1
724	0		724	0		724	0		724	1		724	1		724	1		726	0	2	0	1
725	0		725	0		725	0		725	1		725	1		725	1		727	0	2	0	1
726	0		726	0		726	0		726	1		726	1		726	1		728	0	2	0	1
727	0		727	0		727	0		727	1		727	1		727	1		729	0	2	0	1
728	0		728	0		728	0		728	1		728	1		728	1		730	0	2	0	1
729	0		729	0		729	0		729	1		729	1		729	1		731	0	2	0	1
730	0		730	0		730	0		730	1		730	1		730	1		732	0	2	0	1
731	0		731	0		731	0		731	1		731	1		731	1		733	0	0	0	0
732	0		732	0		732	0		732	0		732	0		732	1		734	0	0	0	0
733	0		733	0		733	0		733	0		733	0		733	0		735	0	0	0	0
734	0		734	0		734	0		734	0		734	0		734	1		736	0	0	0	0
735	0		735	0		735	0		735	0		735	0		735	1		737	0	0	0	0
736	0		736	0		736	0		736	0		736	0		736	1		738	0	0	0	0
737	0		737	0		737	0		737	0		737	0		737	1		739	0	0	0	0
738	0		738	0		738	0		738	0		738	0		738	1		740	0	2	0	1
739	0		739	0		739	0		739	0		739	0		739	0		741	0	2	0	1
740	0		740	0		740	0		740	0		740	0		740	1		742	0	2	0	1
741	0		741	0		741	0		741	1		741	1		741	1		743	0	2	0	1
742	0		742	0		742	0		742	0		742	0		742	1		744	0	2	0	1
743	0		743	0		743	0		743	0		743	0		743	1		745	0	2	0	1
744	0		744	0		744	0		744	1		744	1		744	1		746	0	2	0	1
745	0		745	0		745	0		745	0		745	0		745	1		747	0	2	0	1
746	0		746	0		746	0		746	0		746	0		746	1		748	0	2	0	1
747	0		747	0		747	0		747	0		747	0		747	1		749	0	3	0	1
748	0		748	0		748	0		748	0		748	0		748	1		750	0	3	0	1
749	0		749	0		749	0		749	2		749	2		749	1		751	0	3	0	1
750	0		750	0		750	0		750	2		750	2		750	1		752	0	3	0	1
751	0		751	0		751	0		751	2		751	2		751	1		753	0	3	0	1
752	0		752	0		752	0		752	2		752	2		752	1		754	0	2	0	1
753	0		753	0		753	0		753	2		753	2		753	1		755	0	2	0	1
754	0		754	0		754	0		754	0		754	0		754	1		756	0	2	0	1
755	0		755	0		755	0		755	1		755	1		755	1		757	0	2	0	1
756	0		756	0		756	0		756	1		756	1		756	1		758	0	3	0	1
757	0		757	0		757	0		757	1		757	1		757	1		759	0	3	0	1
758	0		758	0		758	0		758	2		758	2		758	1		760	0	2	0	1
759	0		759	0		759	0		759	2		759	2		759	1		761	0	2	0	1
760	0		760	0		760	0		760	1		760	1		760	1		762	0	2	0	1
761	0		761	0		761	0		761	1		761	1		761	1		763	0	2	0	1
762	0		762	0		762	0		762	1		762	1		762	1		764	0	2	0	1
763	0		763	0		763	0		763	1		763	1		763	1		765	0	2	0	1
764	0		764	0		764	0		764	1		764	1		764	1		766	0	2	0	1
765	0		765	0		765	0		765	1		765	1		765	1		767	0	2	0	1
766	0		766	0		766	0		766	1		766	1		766	1		768	0	2	0	1
767	0		767	0		767	0		767	1		767	1		767	1		769	0	2	0	1
768	0		768	0		768	0		768	1		768	1		768	1		770	0	2	0	1
769	0		769	0		769	0		769	1		769	1		769	1		771	0	2	0	1
770	0		770	0		770	0		770	1		770	1		770	1		772	0	2	0	1
771	0		771	0		771	0		771	1		771	1		771	1		773	0	2	0	1
772	0		772	0		772	0		772	1		772	1		772	1		774	0	2	0	1
773	0		773	0		773	0		773	1		773	1		773	1		775	0	2	0	1
774	0		774	0		774	0		774	1		774	1		774	1		776	0	2	0	1
775	0		775	0		775	0		775	1		775	1		775	1		777	0	2	0	1
776	0		776	0		776	0		776	1		776	1		776	1		778	0	2	0	1
777	0		777	0		777	0		777	1		777	1		777	1		779	0	2	0	1
778	0		778	0		778	0		778	1		778	1		778	1		780	0	2	0	1
779	0		779	0		779	0		779	1		779	1		779	1		781	0	2	0	1
780	0		780	0		780	0		780	1		780	1		780	1		782	0	3	0	1
781	0		781	0		781	0		781	1		781	1		781	1		783	0	3	0	1
782	0		782	0		782	0		782	2		782	2		782	1		784	0	3	0	1
783	0		783	0		783	0		783	2		783	2		783	1		785	0	3	0	1
784	0		784	0		784	0		784	2		784	2		784	1		786	0	3	0	1
785	0		785	0		785	0		785	2		785	2		785	1		787	0	3	0	1
786	0		786	0		786	0		786	2		786	2		786	1		788	0	3	0	1
787	0		787	0		787	0		787	2		787	2		787	1		789	0	3	0	1
788	0		788	0		788	0		788	2		788	2		788	1		790	0	3	0	1
789	0		789	0		789	0		789	2		789	2		789	1		791	0	3	0	1
790	0		790	0		790	0		790	2		790	2		790	1		792	0	3	0	1
791	0		791	0		791	0		791	2		791	2		791	1		793	0	3	0	1
792	0		792	0		792	0		792	2		792	2		792	1		794	0	2	0	1
793	0		793	0		793	0		793	2		793	2		793	1		795	0	2	0	1
794	0		794	0		794	0		794	1		794	1		794	1		796	0	2	0	1
795	0		795	0		795	0		795	1		795	1		795	1		797	0	2	0	1
796	0		796	0		796	0		796	1		796	1		796	1		798	0	2	0	1
797	0		797	0		797	0		797	1		797	1		797	1		799	0	2	0	1
798	0		798	0		798	0		798	0		798	0		798	1		800	0	2	0	1
799	0		799	0		799	0		799	0		799	0		799	1		801	0	2	0	1
800	0		800	0		800	0		800	0		800	0		800	1		802	0	2	0	1
801	0		801	0		801	0		801	0		801	0		801	1		803	0	2	0	1
802	0		802	0		802	0		802	0		802	0		802	1		804	0	2	0	1
803	0		803	0		803	0		803	0		803	0		803	1		805	0	2	0	1
804	0		804	0		804	0		804	0		804	0		804	1		806	0	2	0	1
805	0		805	0		805	0		805	0		805	0		805	1		807	0	2	0	1
806	0		806	0		806	0		806	0		806	0		806	1		808	0	2	0	1
807	0		807	0		807	0		807	0		807	0		807	1		809	0	2	0	1
808	0		808	0		808	0		808	0		808	0		808	1		810	0	2	0	1
809	0		809	0		809	0		809	0		809	0		809	1		811	0	2	0	1
810	0		810	0		810	0		810	0		810	0		810	1		812	0	2	0	1
811	0		811	0		811	0		811	0		811	0		811	1		813	0	2	0	1
812	0		812	0		812	0		812	0		812	0		812	1		814	0	2	0	1
813	0		813	0		813	0		813	0		813	0		813	1		815	0	2	0	1
814	0		814	0		814	0		814	0		814	0		814	1		816	0	2	0	1
815	0		815	0		815	0		815	0		815	0		815	1		817	0	2	0	1
816	0		816	0		816	0		816	0		816	0		816	1		818	0	2	0	1
817	0		817	0		817	0		817	0		817	0		817	1		819	0	2	0	1
818	0		818	0		818	0		818	0		818	0		818	1		820	0	2	0	1
819	0		819	0		819	0		819	0		819	0		819	1		821	0	2	0	1
820	0		820	0		820	0		820	0		820	0		820	1		822	0	2	0	1
821	0		821	0		821	0		821	0		821	0		821	1		823	0	2	0	1
822	0		822	0		822	0		822	0		822	0		822	1		824	0	2	0	1
823	0		823	0		823	0		823	0		823	0		823	1		825	0	2	0	1
824	0		824	0		824	0		824	0		824	0		824	1		826	0	2	0	1
825	0		825	0		825	0		825	0		825	0		825	1		827	0	2	0	1
826	0		826	0		826	0		826	0		826	0		826	1		828	0	2	0	1
827	0		827	0		827	0		827	0		827	0		827	1		829	0	2	0	1
828	0		828	0		828	0		828	0		828	0		828	1		830	0	2	0	1
829	0		829	0		829	0		829	0		829	0		829	1		831	0	2	0	1
830	0		830	0		830	0		830	0		830	0		830	1		832	0	2	0	1
831	0		831	0		831	0		831	0		831	0		831	1		833	0	2	0	1
832	0		832	0		832	0		832	0		832	0		832	1		834	0	2	0	1
833	0		833	0		833	0		833	0		833	0		833	1		835	0	2	0	1
834	0		834	0		834	0		834	0		834	0		834	1		836	0	2	0	1
835	0		835	0		835	0		835	0		835	0		835	1		837	0	2	0	1
836	0		836	0		836	0		836	0		836	0		836	1		838	0	2	0	1
837	0		837	0		837	0		837	0		837	0		837	1		839	0	2	0	1
838	0		838	0		838	0		838	0		838	0		838	1		840	0	2	0	1
839	0		839	0		839	0		839	1		839	1		839	1		841	0	2	0	1
840	0		840	0		840	0		840	1		840	1		840	1		842	0	2	0	1
841	0		841	0		841	0		841	1		841	1		841	1		843	0	2	0	1
842	0		842	0		842	0		842	1		842	1		842	1		844	0	2	0	1
843	0		843	0		843	0		843	0		843	0		843	1		845	0	2	0	1
844	0		844	0		844	0		844	0		844	0		844	1		846	0	2	0	1
845	0		845	0		845	0		845	0		845	0		845	1		847	0	2	0	1
846	0		846	0		846	0		846	0		846	0		846	1		848	0	2	0	1
847	0		847	0		847	0		847	0		847	0		847	1		849	0	2	0	1
848	0		848	0		848	0		848	0		848	0		848	1		850	0	2	0	1
849	0		849	0		849	0		849	0		849	0		849	1		851	0	2	0	1
850	0		850	0		850	0		850	0		850	0		850	1		852	0	0	0	0
851	0		851	0		851	0		851	0		851	0		851	1		853	0	0	0	0
852	0		852	0		852	0		852	0		852	0		852	1		854	0	2	0	1
853	0		853	0		853	0		853	0		853	0		853	1		855	0	2	0	1
854	0		854	0		854	0		854	0		854	0		854	1		856	0	0	0	0
855	0		855	0		855	0		855	0		855	0		855	1		857	0	2	0	1
856	0		856	0		856	0		856	0		856	0		856	1		858	0	2	0	1
857	0		857	0		857	0		857	0		857	0		857	1		859	0	0	0	0
858	0		858	0		858	0		858	0		858	0		858	1		860	0	0	0	0
859	0		859	0		859	0		859	0		859	0		859	1		861	0	0	0	0
860	0		860	0		860	0		860	0		860	0		860	1		862	0	2	0	1
861	0		861	0		861	0		861	0		861	0		861	1		863	0	2	0	1
862	0		862	0		862	0		862	0		862	0		862	1		864	0	2	0	1
863	0		863	0		863	0		863	0		863	0		863	1		865	0	2	0	1
864	0		864	0		864	0		864	0		864	0		864	1		866	0	2	0	1
865	0		865	0		865	0		865	0		865	0		865	1		867	0	2	0	1
866	0		866	0		866	0		866	0		866	0		866	1		868	0	2	0	1
867	0		867	0		867	0		867	0		867	0		867	1		869	0	2	0	1
868	0		868	0		868	0		868	0		868	0		868	1		870	0	2	0	1
869	0		869	0		869	0		869	0		869	0		869	1		871	0	2	0	1
870	0		870	0		870	0		870	0		870	0		870	1		872	0	2	0	1
871	0		871	0		871	0		871	0		871	0		871	1		873	0	2	0	1
872	0		872	0		872	0		872	0		872	0		872	1		874	0	2	0	1
873	0		873	0		873	0		873	0		873	0		873	1		875	0	2	0	1
874	0		874	0		874	0		874	0		874	0		874	1		876	0	2	0	1
875	0		875	0		875	0		875	0		875	0		875	1		877	0	2	0	1
876	0		876	0		876	0		876	0		876	0		876	1		878	0	2	0	1
877	0		877	0		877	0		877	0		877	0		877	1		879	0	2	0	1
878	0		878	0		878	0		878	0		878	0		878	1		880	0	2	0	1
879	0		879	0		879	0		879	0		879	0		879	1		881	0	2	0	1
880	0		880	0		880	0		880	0		880	0		880	1		882	0	2	0	1
881	0		881	0		881	0		881	0		881	0		881	1		883	0	2	0	1
882	0		882	0		882	0		882	0		882	0		882	1		884	0	2	0	1
883	0		883	0		883	0		883	0		883	0		883	1		885	0	2	0	1
884	0		884	0		884	0		884	0		884	0		884	1		886	0	2	0	1
885	0		885	0		885	0		885	0		885	0		885	1		887	0	2	0	1
886	0		886	0		886	0		886	0		886	0		886	1		888	0	2	0	1
887	0		887	0		887	0		887	0		887	0		887	1		889	0	2	0	1
888	0		888	0		888	0		888	0		888	0		888	1		890	0	2	0	1
889	0		889	0		889	0		889	0		889	0		889	1		891	0	2	0	1
890	0		890	0		890	0		890	0		890	0		890	1		892	0	2	0	1
891	0		891	0		891	0		891	0		891	0		891	1		893	0	2	0	1
892	0		892	0		892	0		892	0		892	0		892	1		894	0	2	0	1
893	0		893	0		893	0		893	1		893	1		893	1		895	0	2	0	1
894	0		894	0		894	0		894	0		894	0		894	1		896	0	2	0	1
895	0		895	0		895	0		895	1		895	1		895	1		897	0	2	0	1
896	0		896	0		896	0		896	0		896	0		896	1		898	0	2	0	1
897	0		897	0		897	0		897	0		897	0		897	1		899	0	2	0	1
898	0		898	0		898	0		898	0		898	0		898	1		900	0	2	0	1
899	0		899	0		899	0		899	0		899	0		899	1		901	0	2	0	1
900	0		900	0		900	0		900	0		900	0		900	1		902	0	2	0	1
901	0		901	0		901	0		901	0		901	0		901	1		903	0	2	0	1
902	0		902	0		902	0		902	0		902	0		902	1		904	0	2	0	1
903	0		903	0		903	0		903	0		903	0		903	1		905	0	2	0	1
904	0		904	0		904	0		904	0		904	0		904	1		906	0	2	0	1
905	0		905	0		905	0		905	0		905	0		905	1		907	0	2	0	1
906	0		906	0		906	0		906	0		906	0		906	1		908	0	2	0	1
907	0		907	0		907	0		907	0		907	0		907	1		909	0	2	0	1
908	0		908	0		908	0		908	0		908	0		908	1		910	0	2	0	1
909	0		909	0		909	0		909	0		909	0		909	1		911	0	2	0	1
910	0		910	0		910	0		910	0		910	0		910	1		912	0	2	0	1
911	0		911	0		911	0		911	0		911	0		911	1		913	0	2	0	1
912	0		912	0		912	0		912	0		912	0		912	1		914	0	2	0	1
913	0		913	0		913	0		913	0		913	0		913	1		915	0	2	0	1
914	0		914	0		914	0		914	0		914	0		914	1		916	0	2	0	1
915	0		915	0		915	0		915	0		915	0		915	1		917	0	2	0	1
916	0		916	0		916	0		916	0		916	0		916	1		918	0	2	0	1
917	0		917	0		917	0		917	0		917	0		917	1		919	0	2	0	1
918	0		918	0		918	0		918	0		918	0		918	1		920	0	2	0	1
919	0		919	0		919	0		919	1		919	1		919	1		921	0	2	0	1
920	0		920	0		920	0		920	1		920	1		920	1		922	0	2	0	1
921	0		921	0		921	0		921	1		921	1		921	1		923	0	2	0	1
922	0		922	0		922	0		922	1		922	1		922	1		924	0	2	0	1
923	0		923	0		923	0		923	1		923	1		923	1		925	0	2	0	1
924	0		924	0		924	0		924	1		924	1		924	1		926	0	2	0	1
925	0		925	0		925	0		925	1		925	1		925	1		927	0	2	0	1
926	0		926	0		926	0		926	1		926	1		926	1		928	0	2	0	1
927	0		927	0		927	0		927	1		927	1		927	1		929	0	2	0	1
928	0		928	0		928	0		928	1		928	1		928	1		930	0	2	0	1
929	0		929	0		929	0		929	1		929	1		929	1		931	0	2	0	1
930	0		930	0		930	0		930	1		930	1		930	1		932	0	2	0	1
931	0		931	0		931	0		931	1		931	1		931	1		933	0	2	0	1
932	0		932	0		932	0		932	1		932	1		932	1		934	0	2	0	1
933	0		933	0		933	0		933	1		933	1		933	1		935	0	2	0	1
934	0		934	0		934	0		934	1		934	1		934	1		936	0	2	0	1
935	0		935	0		935	0		935	1		935	1		935	1		937	0	2	0	1
936	0		936	0		936	0		936	1		936	1		936	1		938	0	2	0	1
937	0		937	0		937	0		937	1		937	1		937	1		939	0	2	0	1
938	0		938	0		938	0		938	1		938	1		938	1		940	0	2	0	1
939	0		939	0		939	0		939	1		939	1		939	1		941	0	2	0	1
940	0		940	0		940	0		940	1		940	1		940	1		942	0	2	0	1
941	0		941	0		941	0		941	1		941	1		941	1		943	0	2	0	1
942	0		942	0		942	0		942	1		942	1		942	1		944	0	2	0	1
943	0		943	0		943	0		943	1		943	1		943	1		945	0	2	0	1
944	0		944	0		944	0		944	1		944	1		944	1		946	0	2	0	1
945	0		945	0		945	0		945	1		945	1		945	1		947	0	2	0	1
946	0		946	0		946	0		946	1		946	1		946	1		948	0	2	0	1
947	0		947	0		947	0		947	1		947	1		947	1		949	0	2	0	1
948	0		948	0		948	0		948	1		948	1		948	1		950	0	2	0	1
949	0		949	0		949	0		949	1		949	1		949	1		951	0	2	0	1
950	0		950	0		950	0		950	1		950	1		950	1		952	0	2	0	1
951	0		951	0		951	0		951	1		951	1		951	1		953	0	2	0	1
952	0		952	0		952	0		952	1		952	1		952	1		954	0	2	0	1
953	0		953	0		953	0		953	1		953	1		953	1		955	0	2	0	1
954	0		954	0		954	0		954	1		954	1		954	1		956	0	2	0	1
955	0		955	0		955	0		955	1		955	1		955	1		957	0	2	0	1
956	0		956	0		956	0		956	1		956	1		956	1		958	0	2	0	1
957	0		957	0		957	0		957	1		957	1		957	1		959	0	2	0	1
958	0		958	0		958	0		958	1		958	1		958	1		960	0	2	0	1
959	0		959	0		959	0		959	1		959	1		959	1		961	0	2	0	1
960	0		960	0		960	0		960	1		960	1		960	1		962	0	2	0	1
961	0		961	0		961	0		961	1		961	1		961	1		963	0	2	0	1
962	0		962	0		962	0		962	1		962	1		962	1		964	0	2	0	1
963	0		963	0		963	0		963	1		963	1		963	1		965	0	2	0	1
964	0		964	0		964	0		964	1		964	1		964	1		966	0	2	0	1
965	0		965	0		965	0		965	1		965	1		965	1		967	0	2	0	1
966	0		966	0		966	0		966	1		966	1		966	1		968	0	2	0	1
967	0		967	0		967	0		967	1		967	1		967	1		969	0	2	0	1
968	0		968	0		968	0		968	1		968	1		968	1		970	0	2	0	1
969	0		969	0		969	0		969	1		969	1		969	1		971	0	2	0	1
970	0		970	0		970	0		970	1		970	1		970	1		972	0	2	0	1
971	0		971	0		971	0		971	1		971	1		971	1		973	0	2	0	1
972	0		972	0		972	0		972	1		972	1		972	1		974	0	2	0	1
973	0		973	0		973	0		973	1		973	1		973	1		975	0	2	0	1
974	0		974	0		974	0		974	1		974	1		974	1		976	0	2	0	1
975	0		975	0		975	0		975	1		975	1		975	1		977	0	2	0	1
976	0		976	0		976	0		976	1		976	1		976	1		978	0	2	0	1
977	0		977	0		977	0		977	0		977	0		977	1		979	0	2	0	1
978	0		978	0		978	0		978	0		978	0		978	1		980	0	2	0	1
979	0		979	0		979	0		979	0		979	0		979	1		981	0	2	0	1
980	0		980	0		980	0		980	0		980	0		980	1		982	0	2	0	1
981	0		981	0		981	0		981	0		981	0		981	1		983	0	2	0	1
982	0		982	0		982	0		982	0		982	0		982	1		984	0	2	0	1
983	0		983	0		983	0		983	0		983	0		983	1		985	0	2	0	1
984	0		984	0		984	0		984	0		984	0		984	1		986	0	2	0	1
985	0		985	0		985	0		985	0		985	0		985	1		987	0	2	0	1
986	0		986	0		986	0		986	0		986	0		986	1		988	0	1	0	1
987	0		987	0		987	0		987	0		987	0		987	1		989	0	1	0	1
988	0		988	0		988	0		988	0		988	0		988	0		990	0	1	0	1
989	0		989	0		989	0		989	0		989	0		989	0		991	0	1	0	1
990	0		990	0		990	0		990	0		990	0		990	0		992	0	1	0	1
991	0		991	0		991	0		991	0		991	0		991	0		993	0	1	0	1
992	0		992	0		992	0		992	0		992	0		992	0		994	0	1	0	1
993	0		993	0		993	0		993	1		993	1		993	0		995	0	1	0	1
994	0		994	0		994	0		994	0		994	0		994	0		996	0	1	0	1
995	0		995	0		995	0		995	0		995	0		995	0		997	0	1	0	1
996	0		996	0		996	0		996	1		996	1		996	0		998	0	1	0	1
997	0		997	0		997	0		997	1		997	1		997	0		999	0	1	0	1
998	0		998	0		998	0		998	1		998	1		998	0		1000	0	1	0	1
999	0		999	0		999	0		999	1		999	1		999	0		1001	0	1	0	1
1000	0		1000	0		1000	0		1000	0		1000	0		1000	0		1002	0	1	0	1
1001	0		1001	0		1001	0		1001	0		1001	0		1001	0		1003	0	1	0	1
1002	0		1002	0		1002	0		1002	0		1002	0		1002	0		1004	0	1	0	1
1003	0		1003	0		1003	0		1003	0		1003	0		1003	0		1005	0	1	0	1
1004	0		1004	0		1004	0		1004	0		1004	0		1004	0		1006	0	1	0	1
1005	0		1005	0		1005	0		1005	0		1005	0		1005	0		1007	0	1	0	1
1006	0		1006	0		1006	0		1006	0		1006	0		1006	0		1008	0	1	0	1
1007	0		1007	0		1007	0		1007	0		1007	0		1007	0		1009	0	1	0	1
1008	0		1008	0		1008	0		1008	0		1008	0		1008	0		1010	0	1	0	1
1009	0		1009	0		1009	0		1009	0		1009	0		1009	0		1011	0	1	0	1
1010	0		1010	0		1010	0		1010	0		1010	0		1010	0		1012	0	1	0	1
1011	0		1011	0		1011	0		1011	0		1011	0		1011	0		1013	0	1	0	1
1012	0		1012	0		1012	0		1012	0		1012	0		1012	0		1014	0	1	0	1
1013	0		1013	0		1013	0		1013	0		1013	0		1013	0		1015	0	1	0	1
1014	0		1014	0		1014	0		1014	1		1014	1		1014	0		1016	0	2	0	1
1015	0		1015	0		1015	0		1015	1		1015	1		1015	0		1017	0	2	0	1
1016	0		1016	0		1016	0		1016	1		1016	1		1016	1		1018	0	1	0	1
1017	0		1017	0		1017	0		1017	1		1017	1		1017	1		1019	0	2	0	1
1018	0		1018	0		1018	0		1018	1		1018	1		1018	0		1020	0	1	0	1
1019	0		1019	0		1019	0		1019	1		1019	1		1019	1		1021	0	1	0	1
1020	0		1020	0		1020	0		1020	1		1020	1		1020	0		1022	0	2	0	1
1021	0		1021	0		1021	0		1021	1		1021	1		1021	0		1023	0	2	0	1
1022	0		1022	0		1022	0		1022	1		1022	1		1022	1		1024	0	2	0	1
1023	0		1023	0		1023	0		1023	1		1023	1		1023	1		1025	0	2	0	1
1024	0		1024	0		1024	0		1024	1		1024	1		1024	1		1026	0	2	0	1
1025	0		1025	0		1025	0		1025	1		1025	1		1025	1		1027	0	2	0	1
1026	0		1026	0		1026	0		1026	1		1026	1		1026	1		1028	0	2	0	1
1027	0		1027	0		1027	0		1027	1		1027	1		1027	1		1029	0	2	0	1
1028	0		1028	0		1028	0		1028	1		1028	1		1028	1		1030	0	2	0	1
1029	0		1029	0		1029	0		1029	1		1029	1		1029	1		1031	0	2	0	1
1030	0		1030	0		1030	0		1030	1		1030	1		1030	1		1032	0	2	0	1
1031	0		1031	0		1031	0		1031	1		1031	1		1031	1		1033	0	2	0	1
1032	0		1032	0		1032	0		1032	1		1032	1		1032	1		1034	0	2	0	1
1033	0		1033	0		1033	0		1033	0		1033	0		1033	1		1035	0	2	0	1
1034	0		1034	0		1034	0		1034	0		1034	0		1034	1		1036	0	2	0	1
1035	0		1035	0		1035	0		1035	0		1035	0		1035	1		1037	0	2	0	1
1036	0		1036	0		1036	0		1036	0		1036	0		1036	1		1038	0	2	0	1
1037	0		1037	0		1037	0		1037	0		1037	0		1037	1		1039	0	2	0	1
1038	0		1038	0		1038	0		1038	0		1038	0		1038	1		1040	0	2	0	1
1039	0		1039	0		1039	0		1039	1		1039	1		1039	1		1041	0	1	0	1
1040	0		1040	0		1040	0		1040	1		1040	1		1040	1		1042	0	0	0	0
1041	0		1041	0		1041	0		1041	0		1041	0		1041	0		1043	0	3	0	0
1042	0		1042	0		1042	0		1042	0		1042	0		1042	0		1044	0	3	0	0
1043	0		1043	0		1043	0		1043	2		1043	2		1043	0		1045	0	3	0	1
1044	0		1044	0		1044	0		1044	2		1044	2		1044	0		1046	0	3	0	1
1045	0		1045	0		1045	0		1045	2		1045	2		1045	1		1047	0	3	0	1
1046	0		1046	0		1046	0		1046	2		1046	2		1046	1		1048	0	3	0	1
1047	0		1047	0		1047	0		1047	2		1047	2		1047	1		1049	0	2	0	1
1048	0		1048	0		1048	0		1048	2		1048	2		1048	1		1050	0	3	0	1
1049	0		1049	0		1049	0		1049	0		1049	0		1049	1		1051	0	3	0	1
1050	0		1050	0		1050	0		1050	2		1050	2		1050	1		1052	0	3	0	1
1051	0		1051	0		1051	0		1051	2		1051	2		1051	1		1053	0	3	0	1
1052	0		1052	0		1052	0		1052	2		1052	2		1052	1		1054	0	2	0	1
1053	0		1053	0		1053	0		1053	2		1053	2		1053	1		1055	0	2	0	1
1054	0		1054	0		1054	0		1054	0		1054	0		1054	1		1056	0	2	0	1
1055	0		1055	0		1055	0		1055	1		1055	1		1055	1		1057	0	3	0	1
1056	0		1056	0		1056	0		1056	1		1056	1		1056	1		1058	0	3	0	1
1057	0		1057	0		1057	0		1057	2		1057	2		1057	1		1059	0	3	0	1
1058	0		1058	0		1058	0		1058	2		1058	2		1058	1		1060	0	3	0	1
1059	0		1059	0		1059	0		1059	2		1059	2		1059	1		1061	0	3	0	1
1060	0		1060	0		1060	0		1060	2		1060	2		1060	1		1062	0	3	0	0
1061	0		1061	0		1061	0		1061	2		1061	2		1061	1		1063	0	3	0	0
1062	0		1062	0		1062	0		1062	2		1062	2		1062	0		1064	0	3	0	1
1063	0		1063	0		1063	0		1063	2		1063	2		1063	0		1065	0	3	0	1
1064	0		1064	0		1064	0		1064	2		1064	2		1064	1		1066	0	3	0	1
1065	0		1065	0		1065	0		1065	2		1065	2		1065	1		1067	0	3	0	0
1066	0		1066	0		1066	0		1066	2		1066	2		1066	1		1068	0	3	0	1
1067	0		1067	0		1067	0		1067	2		1067	2		1067	0		1069	0	3	0	1
1068	0		1068	0		1068	0		1068	2		1068	2		1068	1		1070	0	3	0	1
1069	0		1069	0		1069	0		1069	2		1069	2		1069	1		1071	0	3	0	0
1070	0		1070	0		1070	0		1070	2		1070	2		1070	1		1072	0	3	0	1
1071	0		1071	0		1071	0		1071	2		1071	2		1071	0		1073	0	3	0	1
1072	0		1072	0		1072	0		1072	2		1072	2		1072	1		1074	0	3	0	1
1073	0		1073	0		1073	0		1073	2		1073	2		1073	0		1075	0	3	0	1
1074	0		1074	0		1074	0		1074	2		1074	2		1074	1		1076	0	3	0	1
1075	0		1075	0		1075	0		1075	2		1075	2		1075	1		1077	0	3	0	1
1076	0		1076	0		1076	0		1076	2		1076	2		1076	1		1078	0	3	0	0
1077	0		1077	0		1077	0		1077	2		1077	2		1077	1		1079	0	3	0	0
1078	0		1078	0		1078	0		1078	2		1078	2		1078	0		1080	0	3	0	0
1079	0		1079	0		1079	0		1079	2		1079	2		1079	0		1081	0	3	0	0
1080	0		1080	0		1080	0		1080	2		1080	2		1080	0		1082	0	3	0	0
1081	0		1081	0		1081	0		1081	2		1081	2		1081	0		1083	0	3	0	0
1082	0		1082	0		1082	0		1082	2		1082	2		1082	0		1084	0	3	0	0
1083	0		1083	0		1083	0		1083	2		1083	2		1083	0		1085	0	3	0	1
1084	0		1084	0		1084	0		1084	2		1084	2		1084	0		1086	0	3	0	1
1085	0		1085	0		1085	0		1085	2		1085	2		1085	1		1087	0	3	0	0
1086	0		1086	0		1086	0		1086	2		1086	2		1086	0		1088	0	3	0	1
1087	0		1087	0		1087	0		1087	2		1087	2		1087	0		1089	0	3	0	0
1088	0		1088	0		1088	0		1088	2		1088	2		1088	0		1090	0	3	0	0
1089	0		1089	0		1089	0		1089	2		1089	2		1089	0		1091	0	3	0	0
1090	0		1090	0		1090	0		1090	2		1090	2		1090	0		1092	0	3	0	0
1091	0		1091	0		1091	0		1091	2		1091	2		1091	0		1093	0	3	0	0
1092	0		1092	0		1092	0		1092	2		1092	2		1092	0		1094	0	3	0	0
1093	0		1093	0		1093	0		1093	2		1093	2		1093	0		1095	0	3	0	1
1094	0		1094	0		1094	0		1094	2		1094	2		1094	0		1096	0	3	0	0
1095	0		1095	0		1095	0		1095	2		1095	2		1095	0		1097	0	3	0	1
1096	0		1096	0		1096	0		1096	2		1096	2		1096	0		1098	0	3	0	0
1097	0		1097	0		1097	0		1097	2		1097	2		1097	1		1099	0	3	0	1
1098	0		1098	0		1098	0		1098	2		1098	2		1098	0		1100	0	3	0	1
1099	0		1099	0		1099	0		1099	2		1099	2		1099	0		1101	0	3	0	1
1100	0		1100	0		1100	0		1100	2		1100	2		1100	0		1102	0	3	0	0
1101	0		1101	0		1101	0		1101	2		1101	2		1101	0		1103	0	3	0	0
1102	0		1102	0		1102	0		1102	2		1102	2		1102	0		1104	0	3	0	0
1103	0		1103	0		1103	0		1103	2		1103	2		1103	0		1105	0	3	0	0
1104	0		1104	0		1104	0		1104	2		1104	2		1104	0		1106	0	3	0	1
1105	0		1105	0		1105	0		1105	2		1105	2		1105	0		1107	0	3	0	1
1106	0		1106	0		1106	0		1106	2		1106	2		1106	1		1108	0	3	0	1
1107	0		1107	0		1107	0		1107	2		1107	2		1107	1		1109	0	3	0	1
1108	0		1108	0		1108	0		1108	2		1108	2		1108	1		1110	0	3	0	0
1109	0		1109	0		1109	0		1109	2		1109	2		1109	1		1111	0	3	0	1
1110	0		1110	0		1110	0		1110	2		1110	2		1110	0		1112	0	3	0	0
1111	0		1111	0		1111	0		1111	2		1111	2		1111	1		1113	0	3	0	0
1112	0		1112	0		1112	0		1112	2		1112	2		1112	0		1114	0	3	0	1
1113	0		1113	0		1113	0		1113	2		1113	2		1113	0		1115	0	3	0	1
1114	0		1114	0		1114	0		1114	2		1114	2		1114	1		1116	0	3	0	0
1115	0		1115	0		1115	0		1115	2		1115	2		1115	1		1117	0	3	0	1
1116	0		1116	0		1116	0		1116	2		1116	2		1116	0		1118	0	3	0	0
1117	0		1117	0		1117	0		1117	2		1117	2		1117	1		1119	0	3	0	0
1118	0		1118	0		1118	0		1118	2		1118	2		1118	0		1120	0	3	0	1
1119	0		1119	0		1119	0		1119	2		1119	2		1119	0		1121	0	3	0	0
1120	0		1120	0		1120	0		1120	2		1120	2		1120	1		1122	0	3	0	0
1121	0		1121	0		1121	0		1121	2		1121	2		1121	0		1123	0	3	0	0
1122	0		1122	0		1122	0		1122	2		1122	2		1122	0		1124	0	3	0	0
1123	0		1123	0		1123	0		1123	2		1123	2		1123	0		1125	0	3	0	0
1124	0		1124	0		1124	0		1124	2		1124	2		1124	0		1126	0	3	0	0
1125	0		1125	0		1125	0		1125	2		1125	2		1125	0		1127	0	3	0	0
1126	0		1126	0		1126	0		1126	2		1126	2		1126	0		1128	0	3	0	0
1127	0		1127	0		1127	0		1127	2		1127	2		1127	0		1129	0	3	0	0
1128	0		1128	0		1128	0		1128	2		1128	2		1128	0		1130	0	3	0	0
1129	0		1129	0		1129	0		1129	2		1129	2		1129	0		1131	0	3	0	0
1130	0		1130	0		1130	0		1130	2		1130	2		1130	0		1132	0	3	0	0
1131	0		1131	0		1131	0		1131	2		1131	2		1131	0		1133	0	3	0	1
1132	0		1132	0		1132	0		1132	2		1132	2		1132	0		1134	0	3	0	0
1133	0		1133	0		1133	0		1133	2		1133	2		1133	0		1135	0	3	0	0
1134	0		1134	0		1134	0		1134	2		1134	2		1134	0		1136	0	3	0	0
1135	0		1135	0		1135	0		1135	2		1135	2		1135	0		1137	0	3	0	0
1136	0		1136	0		1136	0		1136	2		1136	2		1136	0		1138	0	3	0	0
1137	0		1137	0		1137	0		1137	2		1137	2		1137	0		1139	0	3	0	0
1138	0		1138	0		1138	0		1138	2		1138	2		1138	0		1140	0	3	0	0
1139	0		1139	0		1139	0		1139	2		1139	2		1139	0		1141	0	3	0	0
1140	0		1140	0		1140	0		1140	2		1140	2		1140	0		1142	0	3	0	0
1141	0		1141	0		1141	0		1141	2		1141	2		1141	0		1143	0	3	0	0
1142	0		1142	0		1142	0		1142	2		1142	2		1142	0		1144	0	3	0	0
1143	0		1143	0		1143	0		1143	2		1143	2		1143	0		1145	0	3	0	0
1144	0		1144	0		1144	0		1144	2		1144	2		1144	0		1146	0	3	0	0
1145	0		1145	0		1145	0		1145	2		1145	2		1145	0		1147	0	3	0	0
1146	0		1146	0		1146	0		1146	2		1146	2		1146	0		1148	0	3	0	0
1147	0		1147	0		1147	0		1147	2		1147	2		1147	0		1149	0	3	0	0
1148	0		1148	0		1148	0		1148	2		1148	2		1148	0		1150	0	3	0	0
1149	0		1149	0		1149	0		1149	2		1149	2		1149	0		1151	0	3	0	0
1150	0		1150	0		1150	0		1150	2		1150	2		1150	0		1152	0	3	0	0
1151	0		1151	0		1151	0		1151	2		1151	2		1151	0		1153	0	3	0	0
1152	0		1152	0		1152	0		1152	2		1152	2		1152	0		1154	0	3	0	1
1153	0		1153	0		1153	0		1153	2		1153	2		1153	0		1155	0	3	0	0
1154	0		1154	0		1154	0		1154	2		1154	2		1154	0		1156	0	3	0	0
1155	0		1155	0		1155	0		1155	2		1155	2		1155	0		1157	0	3	0	0
1156	0		1156	0		1156	0		1156	2		1156	2		1156	0		1158	0	3	0	0
1157	0		1157	0		1157	0		1157	2		1157	2		1157	0		1159	0	3	0	0
1158	0		1158	0		1158	0		1158	2		1158	2		1158	0		1160	0	3	0	0
1159	0		1159	0		1159	0		1159	2		1159	2		1159	0		1161	0	3	0	0
1160	0		1160	0		1160	0		1160	2		1160	2		1160	0		1162	0	3	0	0
1161	0		1161	0		1161	0		1161	2		1161	2		1161	0		1163	0	3	0	0
1162	0		1162	0		1162	0		1162	2		1162	2		1162	0		1164	0	3	0	0
1163	0		1163	0		1163	0		1163	2		1163	2		1163	0		1165	0	3	0	0
1164	0		1164	0		1164	0		1164	2		1164	2		1164	0		1166	0	3	0	0
1165	0		1165	0		1165	0		1165	2		1165	2		1165	0		1167	0	3	0	0
1166	0		1166	0		1166	0		1166	2		1166	2		1166	0		1168	0	3	0	0
1167	0		1167	0		1167	0		1167	2		1167	2		1167	0		1169	0	3	0	0
1168	0		1168	0		1168	0		1168	2		1168	2		1168	0		1170	0	3	0	1
1169	0		1169	0		1169	0		1169	2		1169	2		1169	0		1171	0	3	0	1
1170	0		1170	0		1170	0		1170	2		1170	2		1170	1		1172	0	3	0	1
1171	0		1171	0		1171	0		1171	2		1171	2		1171	1		1173	0	3	0	1
1172	0		1172	0		1172	0		1172	2		1172	2		1172	1		1174	0	3	0	1
1173	0		1173	0		1173	0		1173	2		1173	2		1173	1		1175	0	3	0	1
1174	0		1174	0		1174	0		1174	2		1174	2		1174	1		1176	0	3	0	1
1175	0		1175	0		1175	0		1175	2		1175	2		1175	1		1177	0	3	0	1
1176	0		1176	0		1176	0		1176	2		1176	2		1176	1		1178	0	3	0	1
1177	0		1177	0		1177	0		1177	2		1177	2		1177	1		1179	0	2	0	1
1178	0		1178	0		1178	0		1178	2		1178	2		1178	1		1180	0	2	0	1
1179	0		1179	0		1179	0		1179	0		1179	0		1179	1		1181	0	2	0	1
1180	0		1180	0		1180	0		1180	0		1180	0		1180	1		1182	0	2	0	1
1181	0		1181	0		1181	0		1181	0		1181	0		1181	1		1183	0	2	0	1
1182	0		1182	0		1182	0		1182	0		1182	0		1182	1		1184	0	1	0	1
1183	0		1183	0		1183	0		1183	0		1183	0		1183	1		1185	0	1	0	1
1184	0		1184	0		1184	0		1184	0		1184	0		1184	0		1186	0	1	0	1
1185	0		1185	0		1185	0		1185	0		1185	0		1185	0		1187	0	1	0	1
1186	0		1186	0		1186	0		1186	0		1186	0		1186	0		1188	0	1	0	1
1187	0		1187	0		1187	0		1187	0		1187	0		1187	0		1189	0	1	0	1
1188	0		1188	0		1188	0		1188	0		1188	0		1188	0		1190	0	0	0	0
1189	0		1189	0		1189	0		1189	0		1189	0		1189	0		1191	0	0	0	0
1190	0		1190	0		1190	0		1190	0		1190	0		1190	0		1192	0	1	0	1
1191	0		1191	0		1191	0		1191	0		1191	0		1191	0		1193	0	0	0	0
1192	0		1192	0		1192	0		1192	0		1192	0		1192	0		1194	0	1	0	1
1193	0		1193	0		1193	0		1193	0		1193	0		1193	0
1194	0		1194	0		1194	0		1194	0		1194	0		1194	0

## Sheet: Fig.S1c
obj_loss	box_loss	cls_loss
0.053331	0.097527	0.060153
0.056808	0.0721	0.045724
0.046386	0.074026	0.036211
0.041377	0.074514	0.030525
0.038693	0.072057	0.028252
0.038919	0.065052	0.025218
0.03862	0.059476	0.024114
0.037995	0.053453	0.022596
0.036484	0.048377	0.021024
0.036923	0.047479	0.020236
0.036693	0.042881	0.017967
0.035614	0.044587	0.017579
0.034144	0.042217	0.017038
0.035848	0.044067	0.016165
0.034765	0.041461	0.015575
0.033325	0.039193	0.015065
0.033063	0.038959	0.014251
0.032831	0.038225	0.013704
0.03126	0.038264	0.013817
0.032497	0.039199	0.013303
0.031376	0.040416	0.012182
0.03252	0.037022	0.011752
0.032129	0.036754	0.011619
0.032056	0.036975	0.010795
0.030725	0.03493	0.010837
0.030737	0.033843	0.010455
0.030235	0.034557	0.010225
0.030781	0.035226	0.010027
0.029581	0.037815	0.0095335
0.03002	0.033742	0.0097754
0.030948	0.03351	0.0094387
0.031044	0.034397	0.0099424
0.031801	0.033754	0.0091007
0.029158	0.032568	0.010016
0.029124	0.033154	0.0083973
0.030162	0.033443	0.008102
0.029658	0.032537	0.0079094
0.028523	0.033047	0.0081735
0.028318	0.031103	0.0081483
0.029156	0.032049	0.0074873
0.029195	0.03257	0.0070751
0.028798	0.034058	0.0077846
0.029081	0.032694	0.0082058
0.027788	0.031748	0.006802
0.029348	0.03201	0.0075239
0.027953	0.031175	0.0072543
0.027521	0.029851	0.006964
0.028485	0.031428	0.0069139
0.026874	0.029616	0.0070788
0.026588	0.029559	0.0065345
0.027136	0.029637	0.0060829
0.027201	0.031488	0.0062011
0.027568	0.030563	0.0064796
0.026387	0.02812	0.0061551
0.027006	0.029274	0.006003
0.026647	0.029264	0.0063721
0.026665	0.029938	0.0061795
0.02735	0.029053	0.0064838
0.026144	0.027886	0.0062708
0.026958	0.027975	0.0062146
0.026956	0.028235	0.0061621
0.026237	0.027678	0.0061216
0.026094	0.028484	0.0057809
0.026474	0.028623	0.0059934
0.02641	0.027812	0.0059856
0.026495	0.026595	0.005395
0.02478	0.027467	0.006145
0.02625	0.029046	0.0057478
0.025515	0.026646	0.0050109
0.025232	0.027343	0.0059149
0.025903	0.0261	0.0051022
0.025435	0.028372	0.0050615
0.025384	0.027572	0.0047977
0.024538	0.026727	0.0048074
0.024922	0.027433	0.0049962
0.025376	0.026569	0.0052271
0.02554	0.027201	0.0051903
0.025187	0.02566	0.0049229
0.024263	0.02476	0.0051755
0.024248	0.026285	0.0048505
0.02579	0.026038	0.0048758
0.023548	0.025234	0.0046305
0.024153	0.025415	0.0048153
0.024914	0.026588	0.0047494
0.023338	0.025844	0.0054732
0.024459	0.026041	0.0045451
0.024674	0.025835	0.0042495
0.024621	0.025072	0.0045153
0.024574	0.025267	0.0045592
0.024027	0.02432	0.004139
0.023692	0.024457	0.0050473
0.023208	0.025159	0.0048353
0.023563	0.024699	0.0045406
0.022614	0.026086	0.0044808
0.023966	0.024174	0.004113
0.023428	0.026129	0.004008
0.022952	0.023567	0.0045622
0.024468	0.02401	0.0038522
0.022896	0.023178	0.0042476
0.024163	0.024179	0.0044418
0.022488	0.024644	0.0041868
0.023041	0.023608	0.0041206
0.02417	0.024547	0.0041297
0.02394	0.02516	0.0043575
0.022881	0.02279	0.0037242
0.02206	0.023326	0.0044595
0.023285	0.023712	0.0041566
0.023342	0.022795	0.0040831
0.023256	0.023667	0.004064
0.022105	0.023518	0.0035802
0.022995	0.025033	0.0038707
0.023184	0.023346	0.0042199
0.023215	0.022923	0.0037846
0.022645	0.022548	0.0038295
0.022516	0.022823	0.0036802
0.021968	0.023496	0.0036
0.021383	0.021761	0.0042983
0.022466	0.02246	0.0042979
0.022032	0.022883	0.0045458
0.022744	0.022954	0.0041004
0.022977	0.022485	0.0035433
0.022668	0.022014	0.0037097
0.022554	0.022674	0.0041018
0.022547	0.022471	0.0034836
0.02242	0.022207	0.0035801
0.021424	0.023198	0.003547
0.02114	0.022336	0.0041728
0.021654	0.022064	0.0038705
0.021092	0.022106	0.0036358
0.021976	0.021889	0.0036611
0.020806	0.020604	0.0029921
0.021023	0.021893	0.0036616
0.021074	0.021133	0.0037587
0.021007	0.0206	0.0033266
0.021274	0.021112	0.0038138
0.020773	0.021888	0.0032496
0.021891	0.02237	0.0035059
0.020429	0.020827	0.003651
0.021084	0.020729	0.003124
0.020576	0.020968	0.0034893
0.020584	0.020712	0.003657
0.021506	0.020059	0.0032901
0.020679	0.021309	0.0036005
0.020139	0.020666	0.0029818
0.020907	0.020471	0.0037497
0.020784	0.020093	0.0031905
0.020194	0.021207	0.0031847
0.020459	0.020856	0.0033755
0.020893	0.019795	0.0034378
0.020032	0.020344	0.0030476
0.020633	0.019903	0.0035268
0.02026	0.020462	0.0035548
0.02079	0.019889	0.0029501
0.020955	0.020117	0.0030471
0.021094	0.020047	0.0031243
0.019776	0.019844	0.0027866
0.02004	0.019515	0.0033352
0.020133	0.019056	0.0030786
0.020057	0.01941	0.0031826
0.018971	0.019938	0.0033845
0.019848	0.019408	0.0026685
0.019458	0.019531	0.003077
0.019343	0.020103	0.0031532
0.020193	0.01998	0.0031627
0.019562	0.019061	0.0029685
0.019367	0.019888	0.0028779
0.019104	0.019001	0.0032043
0.018424	0.018898	0.0028504
0.019575	0.018777	0.0030533
0.019353	0.01901	0.0026713
0.018182	0.018496	0.0027722
0.019733	0.018912	0.003009
0.020162	0.018553	0.003162
0.019181	0.018239	0.0028633
0.019292	0.018848	0.0029774
0.019878	0.018629	0.0027639
0.01939	0.017999	0.0024911
0.018519	0.017703	0.0031207
0.018691	0.018215	0.0026185
0.019176	0.018335	0.0027247
0.019757	0.018711	0.0024754
0.019937	0.019139	0.0029539
0.018299	0.018014	0.0029182
0.018806	0.019058	0.0026483
0.018488	0.017747	0.0023246
0.019272	0.018298	0.0033567
0.018672	0.017721	0.0023707
0.018899	0.01752	0.002645
0.019584	0.01863	0.002796
0.018458	0.017868	0.0022074
0.018812	0.018173	0.0025416
0.019499	0.017903	0.002519
0.018036	0.017228	0.0025309
0.018057	0.017465	0.0025572
0.019053	0.017923	0.0025482
0.019178	0.018378	0.0028056
0.017637	0.016969	0.0026294
0.018196	0.01734	0.0022286
0.018387	0.016318	0.0023847
0.018599	0.016446	0.0023313
0.017341	0.017435	0.0026781
0.01878	0.01626	0.0024305
0.018463	0.016439	0.0023594
0.017517	0.017582	0.002532
0.017877	0.016686	0.0021971
0.018236	0.016446	0.0022056
0.017279	0.017036	0.002701
0.018117	0.016772	0.002946
0.018884	0.016913	0.002258
0.016921	0.016288	0.002434
0.017324	0.015969	0.0020884
0.017752	0.016373	0.0022311
0.016951	0.015845	0.0020293
0.017326	0.015785	0.0024251
0.017899	0.016056	0.0021912
0.017041	0.016212	0.0020881
0.0176	0.016139	0.0022547
0.017978	0.016176	0.0021245
0.017998	0.015526	0.0021912
0.016529	0.015752	0.0024755
0.016269	0.016436	0.0023089
0.017296	0.015848	0.0022086
0.016889	0.015653	0.002681
0.017079	0.015944	0.0021542
0.016712	0.01522	0.0022288
0.017092	0.015897	0.0023205
0.017177	0.015415	0.0020089
0.016855	0.015339	0.0020541
0.016746	0.01489	0.0020948
0.016171	0.015379	0.0022926
0.016911	0.014937	0.0020248
0.01662	0.015538	0.002408
0.017126	0.015201	0.0026829
0.016482	0.014992	0.0023151
0.016874	0.01512	0.002374
0.016773	0.015506	0.0021933
0.016387	0.015315	0.0024289
0.016272	0.014837	0.0021874
0.016005	0.014787	0.0020337
0.016245	0.015043	0.0020679
0.016632	0.01455	0.0019615
0.016125	0.01472	0.0023475
0.015918	0.01456	0.0020546
0.016663	0.014633	0.0020496
0.01617	0.014671	0.0018032
0.015608	0.015083	0.0026306
0.015785	0.014362	0.0021768
0.015985	0.014712	0.0020206
0.015908	0.013872	0.0019236
0.016191	0.01433	0.0019738
0.015342	0.014642	0.0021469
0.016588	0.014536	0.0017386
0.01624	0.013893	0.0020421
0.015629	0.014653	0.0022044
0.015792	0.013893	0.0018942
0.015825	0.013788	0.0017579
0.015982	0.01429	0.0020485
0.016287	0.013744	0.0017822
0.015308	0.014039	0.0019539
0.014893	0.013887	0.001989
0.015468	0.013669	0.0018014
0.015551	0.013841	0.0020667
0.015185	0.013786	0.0021398
0.015333	0.013471	0.0020489
0.015453	0.01358	0.0022194
0.015051	0.013453	0.0021639
0.015123	0.01368	0.0020152
0.014995	0.013399	0.001953
0.015495	0.013854	0.0016074
0.015731	0.013194	0.0018759
0.015317	0.014066	0.0022728
0.015257	0.013494	0.0016987
0.014624	0.013119	0.0017571
0.014656	0.01365	0.0017842
0.014905	0.013223	0.0017791
0.014317	0.013291	0.0016056
0.014775	0.013332	0.0018153
0.014927	0.013319	0.0020013
0.014539	0.013116	0.0015847
0.014773	0.013282	0.0018804
0.014976	0.01301	0.0017725
0.014437	0.012909	0.0017259
0.01475	0.013152	0.0018063
0.015071	0.013222	0.0018974
0.014734	0.012756	0.0016455
0.014916	0.012886	0.0021851
0.014611	0.012342	0.0015187
0.014877	0.012712	0.0017494
0.014755	0.013165	0.0020025
0.014602	0.01289	0.0016386
0.014196	0.012253	0.0015476
0.014071	0.01273	0.0017716
0.014648	0.012825	0.0020981
0.014717	0.01253	0.0016492
0.014413	0.01223	0.0017898
0.014843	0.01268	0.0017449
0.01425	0.012201	0.0014268
0.013972	0.012615	0.0015837
0.014292	0.01257	0.0016872
0.014651	0.012599	0.0016573

## Sheet: Fig.S1d
obj_loss	box_loss	cls_loss
0.045503	0.071441	0.048896
0.050137	0.067777	0.0332
0.036089	0.078529	0.02631
0.031912	0.067867	0.023315
0.029501	0.074438	0.019971
0.026998	0.059099	0.018103
0.027775	0.055346	0.017499
0.026939	0.044315	0.01448
0.026406	0.04677	0.013895
0.024746	0.042119	0.012341
0.024386	0.043694	0.013242
0.026104	0.036533	0.015482
0.022946	0.03578	0.010054
0.023532	0.037142	0.012139
0.022732	0.035976	0.0094089
0.023235	0.031237	0.0090478
0.021944	0.035268	0.0080731
0.022022	0.032453	0.0087523
0.021722	0.03685	0.0082634
0.022051	0.035868	0.0072666
0.022267	0.037515	0.0089991
0.020273	0.031097	0.0068379
0.020844	0.03684	0.0071411
0.02048	0.031468	0.0063787
0.022694	0.031972	0.0089163
0.019924	0.031903	0.0067703
0.020587	0.030596	0.0073572
0.022854	0.032438	0.0086427
0.019184	0.031132	0.0054882
0.019462	0.02987	0.0047494
0.019176	0.029393	0.0053298
0.01861	0.025716	0.0055868
0.019482	0.031113	0.0053449
0.020944	0.030328	0.0052886
0.019564	0.027013	0.004182
0.018502	0.025763	0.0043943
0.018062	0.029668	0.0037696
0.019662	0.030061	0.0052089
0.023675	0.027888	0.0063065
0.018871	0.025887	0.0040374
0.021123	0.029165	0.0083304
0.018561	0.029776	0.0043702
0.018713	0.027989	0.004374
0.019072	0.027193	0.0041554
0.017786	0.027678	0.0047256
0.017831	0.02646	0.004399
0.017746	0.025347	0.0040349
0.018088	0.025589	0.0064154
0.017335	0.025506	0.0036469
0.017716	0.02829	0.0032455
0.017249	0.027054	0.0037712
0.018846	0.023245	0.006
0.017002	0.024249	0.0037672
0.017147	0.025154	0.0056526
0.016731	0.023676	0.0034299
0.017139	0.024225	0.0047683
0.01779	0.027677	0.0036997
0.01638	0.02346	0.0037096
0.016047	0.02272	0.0034682
0.016056	0.02199	0.0047673
0.01689	0.021764	0.0039793
0.015922	0.021928	0.0034393
0.016929	0.023729	0.0049227
0.016761	0.021571	0.0043647
0.016384	0.022965	0.0033534
0.016257	0.023064	0.0036901
0.015983	0.022459	0.003729
0.016104	0.021221	0.0035785
0.01539	0.021275	0.0039033
0.016158	0.021484	0.0038062
0.015596	0.020998	0.0036736
0.015589	0.023413	0.0036422
0.015966	0.020988	0.0039079
0.016059	0.022445	0.0033209
0.015841	0.022247	0.0035158
0.015374	0.020114	0.002977
0.015753	0.021387	0.0037125
0.015591	0.021152	0.0040953
0.015184	0.020319	0.0038611
0.015611	0.020195	0.0041153
0.015757	0.022629	0.0036508
0.014903	0.020587	0.0034957
0.014592	0.020203	0.0034857
0.014652	0.019662	0.0037
0.014427	0.020397	0.003473
0.015743	0.021794	0.003517
0.015116	0.019887	0.0034756
0.014266	0.018588	0.0032937
0.014838	0.020366	0.0033517
0.014068	0.018023	0.0033955
0.015203	0.018929	0.0043393
0.014954	0.017878	0.0038568
0.015218	0.019715	0.0035187
0.014917	0.020495	0.0030328
0.015463	0.02055	0.0041601
0.015617	0.019192	0.0041066
0.015054	0.019889	0.0041107
0.01664	0.019882	0.0039659
0.013829	0.017516	0.002713
0.013649	0.017949	0.0027494
0.013702	0.017848	0.0025942
0.013549	0.017801	0.0030565
0.014201	0.019811	0.0031499
0.013589	0.016873	0.0032761
0.013422	0.016835	0.0030143
0.013856	0.01759	0.0031601
0.01389	0.017075	0.0031106
0.0138	0.016225	0.0031824
0.013901	0.017208	0.0032533
0.013897	0.020169	0.0033419
0.013145	0.016498	0.0033792
0.013126	0.015586	0.0034415
0.013268	0.017121	0.0032538
0.013109	0.017504	0.0032033
0.012777	0.015932	0.0033455
0.013132	0.016078	0.0034412
0.013056	0.015598	0.0032359
0.013964	0.019303	0.0033804
0.013596	0.016501	0.0032605
0.013365	0.015612	0.0031349
0.013111	0.016499	0.0032238
0.01345	0.017358	0.0030444
0.013319	0.016514	0.0031779
0.012984	0.014955	0.0032425
0.013	0.016716	0.0033453
0.012989	0.01741	0.0032766
0.01317	0.017138	0.0034443
0.012798	0.015392	0.003347
0.012565	0.015132	0.0033542
0.012733	0.015228	0.0033141
0.012947	0.01521	0.0031953
0.013011	0.014481	0.0033469
0.013182	0.015432	0.003294
0.013568	0.015345	0.0032304
0.013261	0.015215	0.0032066
0.012609	0.01514	0.0033209
0.012986	0.016214	0.0033604
0.012207	0.014569	0.0033798
0.012715	0.015119	0.0031935
0.011856	0.014412	0.0033642
0.012622	0.015696	0.0035448
0.012639	0.01508	0.0032906
0.012712	0.015192	0.0033775
0.012645	0.014625	0.0034059
0.012375	0.014501	0.0033444
0.012629	0.015222	0.0032929
0.012393	0.015158	0.0032279
0.012582	0.014444	0.0032313
0.012708	0.015001	0.0031401
0.01254	0.014565	0.0032672
0.012109	0.014577	0.0032072
0.011917	0.013763	0.0031896
0.01209	0.014588	0.0031609
0.011754	0.014175	0.0030234
0.01238	0.014772	0.0031167
0.012114	0.014194	0.0031847
0.01198	0.013938	0.0032335
0.012327	0.013751	0.0034079
0.011742	0.013616	0.0036455
0.01148	0.013047	0.0032832
0.011577	0.013727	0.003069
0.011518	0.013596	0.0029752
0.011428	0.013751	0.0030552
0.01182	0.013287	0.0030425
0.011679	0.013823	0.003039
0.012289	0.014494	0.0031372
0.012055	0.013471	0.0031645
0.012184	0.013592	0.0031785
0.012077	0.013445	0.0030861
0.011736	0.013598	0.0029883
0.011897	0.013818	0.0030459
0.011513	0.013196	0.0030194
0.011813	0.013562	0.0030338
0.011804	0.01328	0.0030716
0.011503	0.012964	0.0031466
0.011399	0.01257	0.0032776
0.011526	0.013158	0.0031775
0.011037	0.012419	0.0030596
0.011415	0.012695	0.0030217
0.011446	0.012376	0.0031648
0.011249	0.012549	0.0031182
0.011804	0.012748	0.0031124
0.011643	0.0136	0.0031905
0.011513	0.012836	0.0031284
0.011017	0.012429	0.0031737
0.011057	0.012493	0.0032447
0.011085	0.01245	0.0032227
0.010987	0.012255	0.0031617
0.010999	0.01251	0.0032749
0.011315	0.013031	0.0032732
0.010482	0.012316	0.0033564
0.01028	0.012297	0.0032734
0.010463	0.012217	0.0031552
0.010835	0.012887	0.0032003
0.010752	0.012134	0.0032004
0.0107	0.011755	0.0031702
0.01058	0.011687	0.0031979
0.010667	0.011727	0.0032057
0.010564	0.011485	0.0031735
0.010934	0.012171	0.0027949
0.011355	0.012066	0.0030795
0.011073	0.011697	0.0031194
0.011314	0.012037	0.0030578
0.010947	0.011856	0.0031378
0.011173	0.012185	0.0032254
0.010662	0.011604	0.0032157
0.010443	0.011304	0.0032783
0.010831	0.011496	0.0032727
0.010979	0.011547	0.0031789
0.010428	0.010999	0.0030783
0.010561	0.011173	0.0030431
0.010119	0.010465	0.0030715
0.010519	0.010959	0.0030417
0.010576	0.011095	0.0029677
0.010973	0.011127	0.0029466
0.010771	0.010916	0.0029802
0.010726	0.010757	0.0030739
0.010396	0.01077	0.0030662
0.01084	0.011167	0.0030761
0.010355	0.01081	0.0031145
0.010301	0.010872	0.0031145
0.0099626	0.010652	0.0031059
0.0097846	0.010751	0.0029092
0.0096357	0.010191	0.0029026
0.009947	0.010273	0.0028026
0.010189	0.010297	0.0028539
0.010147	0.010506	0.0028943
0.0099596	0.010278	0.002988
0.0099279	0.010138	0.0029914
0.0099348	0.010156	0.0030685
0.010178	0.010381	0.0031221
0.010057	0.010721	0.0030739
0.010044	0.010522	0.0031199
0.01007	0.010027	0.0030891
0.0099169	0.010074	0.0030816
0.0098182	0.010114	0.0030294
0.009951	0.010443	0.0030156
0.01001	0.010119	0.0030406
0.010312	0.010405	0.0030319
0.011096	0.010434	0.0029572
0.010434	0.010018	0.0030406
0.0099108	0.0099278	0.003073
0.0098681	0.0099688	0.0030944
0.010155	0.010037	0.0030975
0.010182	0.010163	0.0031145
0.010027	0.0098975	0.0030923
0.010086	0.01001	0.003087
0.0098727	0.0095306	0.0029923
0.0096916	0.0097551	0.0030546
0.0097335	0.0098364	0.0030266
0.0098873	0.0097709	0.0031127
0.0095201	0.0094737	0.0031141
0.0095433	0.0095956	0.0031126
0.0095426	0.0095743	0.0031632
0.0094579	0.0097516	0.0031332
0.0094313	0.0099052	0.0031149
0.0095728	0.0099796	0.0031296
0.0094091	0.0094184	0.0031031
0.00919	0.009142	0.0032153
0.009247	0.0091172	0.0032475
0.0090065	0.0089397	0.0032713
0.0089344	0.009029	0.0032883
0.008944	0.0089766	0.0033203
0.0088525	0.0089819	0.003313
0.0089884	0.0090028	0.003252
0.0092217	0.0092059	0.0030858
0.0095645	0.0091605	0.0031924
0.0091762	0.0090769	0.0031319
0.0091819	0.0089236	0.0030077
0.0090131	0.0087789	0.0031466
0.0091169	0.0088888	0.0032238
0.0090797	0.0087395	0.0031887
0.0090529	0.0086329	0.0031993
0.0090744	0.008618	0.003203
0.009148	0.0086909	0.0032037
0.0091354	0.0087633	0.0032303
0.0090023	0.0086247	0.0032173
0.0090399	0.0085931	0.0031152
0.0089001	0.0083927	0.0031654
0.0089514	0.0084668	0.0032358
0.0091386	0.0085373	0.0032876
0.009194	0.0086593	0.0032933
0.0089032	0.0086289	0.0033052
0.0087545	0.0086577	0.003168
0.0087683	0.0086152	0.0031633
0.0089414	0.0084601	0.0032374
0.0090022	0.0084695	0.003231
0.008937	0.0084103	0.0032505
0.008804	0.0083052	0.0032439
0.008812	0.0083699	0.0032885
0.0088785	0.0084779	0.0032669
0.0089494	0.0084979	0.0032648
0.0089288	0.008462	0.0032536
0.0089566	0.0084798	0.0032509
0.0090138	0.0083963	0.0032457
0.0090651	0.0083496	0.0032575
0.0089334	0.0082413	0.0032704
0.0089111	0.0082318	0.0032596
0.0088873	0.0081733	0.0032477
0.008841	0.0081769	0.0032817

## Sheet: Fig.S1e
x	y
0.001001	1
0.002002	1
0.003003	1
0.004004	1
0.005005	1
0.00600601	1
0.00700701	1
0.00800801	1
0.00900901	1
0.01001	1
0.011011	1
0.012012	1
0.013013	1
0.014014	1
0.015015	1
0.016016	1
0.017017	1
0.018018	1
0.019019	1
0.02002	1
0.021021	1
0.022022	1
0.023023	1
0.024024	1
0.025025	1
0.026026	1
0.027027	1
0.028028	1
0.029029	1
0.03003	1
0.031031	1
0.032032	1
0.033033	1
0.034034	1
0.035035	1
0.036036	1
0.037037	1
0.038038	1
0.039039	1
0.04004	1
0.041041	1
0.042042	1
0.043043	1
0.044044	1
0.045045	1
0.046046	1
0.047047	1
0.0480481	1
0.049049	1
0.05005	1
0.0510511	1
0.0520521	1
0.053053	1
0.0540541	1
0.0550551	1
0.0560561	1
0.0570571	1
0.0580581	1
0.0590591	1
0.0600601	1
0.0610611	1
0.0620621	1
0.0630631	1
0.0640641	1
0.0650651	1
0.0660661	1
0.0670671	1
0.0680681	1
0.0690691	1
0.0700701	1
0.0710711	1
0.0720721	1
0.0730731	1
0.0740741	1
0.0750751	1
0.0760761	1
0.0770771	1
0.0780781	1
0.0790791	1
0.0800801	1
0.0810811	1
0.0820821	1
0.0830831	1
0.0840841	1
0.0850851	1
0.0860861	1
0.0870871	1
0.0880881	1
0.0890891	1
0.0900901	1
0.0910911	1
0.0920921	1
0.0930931	1
0.0940941	1
0.0950951	1
0.0960961	1
0.0970971	1
0.0980981	1
0.0990991	1
0.1001	1
0.101101	1
0.102102	1
0.103103	1
0.104104	1
0.105105	1
0.106106	1
0.107107	1
0.108108	1
0.109109	1
0.11011	1
0.111111	1
0.112112	1
0.113113	1
0.114114	1
0.115115	1
0.116116	1
0.117117	1
0.118118	1
0.119119	1
0.12012	1
0.121121	1
0.122122	1
0.123123	1
0.124124	1
0.125125	1
0.126126	1
0.127127	1
0.128128	1
0.129129	1
0.13013	1
0.131131	1
0.132132	1
0.133133	1
0.134134	1
0.135135	1
0.136136	1
0.137137	1
0.138138	1
0.139139	1
0.14014	1
0.141141	1
0.142142	1
0.143143	1
0.144144	1
0.145145	1
0.146146	1
0.147147	1
0.148148	1
0.149149	1
0.15015	1
0.151151	1
0.152152	1
0.153153	1
0.154154	1
0.155155	1
0.156156	1
0.157157	1
0.158158	1
0.159159	1
0.16016	1
0.161161	1
0.162162	1
0.163163	1
0.164164	1
0.165165	1
0.166166	1
0.167167	1
0.168168	1
0.169169	1
0.17017	1
0.171171	1
0.172172	1
0.173173	1
0.174174	1
0.175175	1
0.176176	1
0.177177	1
0.178178	1
0.179179	1
0.18018	1
0.181181	1
0.182182	1
0.183183	1
0.184184	1
0.185185	1
0.186186	1
0.187187	1
0.188188	1
0.189189	1
0.19019	1
0.191191	1
0.192192	1
0.193193	1
0.194194	1
0.195195	1
0.196196	1
0.197197	1
0.198198	1
0.199199	1
0.2002	1
0.201201	1
0.202202	1
0.203203	1
0.204204	1
0.205205	1
0.206206	1
0.207207	1
0.208208	1
0.209209	1
0.21021	1
0.211211	1
0.212212	1
0.213213	1
0.214214	1
0.215215	1
0.216216	1
0.217217	1
0.218218	1
0.219219	1
0.22022	1
0.221221	1
0.222222	1
0.223223	1
0.224224	1
0.225225	1
0.226226	1
0.227227	1
0.228228	1
0.229229	1
0.23023	1
0.231231	1
0.232232	1
0.233233	1
0.234234	1
0.235235	1
0.236236	1
0.237237	1
0.238238	1
0.239239	1
0.24024	1
0.241241	1
0.242242	1
0.243243	1
0.244244	1
0.245245	1
0.246246	1
0.247247	1
0.248248	1
0.249249	1
0.25025	1
0.251251	1
0.252252	1
0.253253	1
0.254254	1
0.255255	1
0.256256	1
0.257257	1
0.258258	1
0.259259	1
0.26026	1
0.261261	1
0.262262	1
0.263263	1
0.264264	1
0.265265	1
0.266266	1
0.267267	1
0.268268	1
0.269269	1
0.27027	1
0.271271	1
0.272272	1
0.273273	1
0.274274	1
0.275275	1
0.276276	1
0.277277	1
0.278278	1
0.279279	1
0.28028	1
0.281281	1
0.282282	1
0.283283	1
0.284284	1
0.285285	1
0.286286	1
0.287287	1
0.288288	1
0.289289	1
0.29029	1
0.291291	1
0.292292	1
0.293293	1
0.294294	1
0.295295	1
0.296296	1
0.297297	1
0.298298	1
0.299299	1
0.3003	1
0.301301	1
0.302302	1
0.303303	1
0.304304	1
0.305305	1
0.306306	1
0.307307	1
0.308308	1
0.309309	1
0.31031	1
0.311311	1
0.312312	1
0.313313	1
0.314314	1
0.315315	1
0.316316	1
0.317317	1
0.318318	1
0.319319	1
0.32032	1
0.321321	1
0.322322	1
0.323323	1
0.324324	1
0.325325	1
0.326326	1
0.327327	1
0.328328	1
0.329329	1
0.33033	1
0.331331	1
0.332332	1
0.333333	1
0.334334	0.972222
0.335335	0.972222
0.336336	0.972222
0.337337	0.972222
0.338338	0.972222
0.339339	0.972222
0.34034	0.972222
0.341341	0.972222
0.342342	0.972222
0.343343	0.972222
0.344344	0.972222
0.345345	0.972222
0.346346	0.972222
0.347347	0.972222
0.348348	0.972222
0.349349	0.972222
0.35035	0.972222
0.351351	0.972222
0.352352	0.972222
0.353353	0.972222
0.354354	0.972222
0.355355	0.972222
0.356356	0.972222
0.357357	0.972222
0.358358	0.972222
0.359359	0.972222
0.36036	0.972222
0.361361	0.972222
0.362362	0.972222
0.363363	0.972222
0.364364	0.972222
0.365365	0.972222
0.366366	0.972222
0.367367	0.972222
0.368368	0.972222
0.369369	0.972222
0.37037	0.972222
0.371371	0.972222
0.372372	0.972222
0.373373	0.972222
0.374374	0.972222
0.375375	0.972222
0.376376	0.972222
0.377377	0.972222
0.378378	0.972222
0.379379	0.972222
0.38038	0.972222
0.381381	0.972222
0.382382	0.972222
0.383383	0.972222
0.384384	0.972222
0.385385	0.972222
0.386386	0.972222
0.387387	0.972222
0.388388	0.972222
0.389389	0.972222
0.39039	0.972222
0.391391	0.972222
0.392392	0.972222
0.393393	0.972222
0.394394	0.972222
0.395395	0.972222
0.396396	0.972222
0.397397	0.972222
0.398398	0.972222
0.399399	0.972222
0.4004	0.972222
0.401401	0.972222
0.402402	0.972222
0.403403	0.972222
0.404404	0.972222
0.405405	0.972222
0.406406	0.972222
0.407407	0.972222
0.408408	0.972222
0.409409	0.972222
0.41041	0.972222
0.411411	0.972222
0.412412	0.972222
0.413413	0.972222
0.414414	0.972222
0.415415	0.972222
0.416416	0.972222
0.417417	0.972222
0.418418	0.972222
0.419419	0.972222
0.42042	0.972222
0.421421	0.972222
0.422422	0.972222
0.423423	0.972222
0.424424	0.972222
0.425425	0.972222
0.426426	0.972222
0.427427	0.972222
0.428428	0.972222
0.429429	0.972222
0.43043	0.972222
0.431431	0.972222
0.432432	0.972222
0.433433	0.972222
0.434434	0.972222
0.435435	0.972222
0.436436	0.972222
0.437437	0.972222
0.438438	0.972222
0.439439	0.972222
0.44044	0.972222
0.441441	0.972222
0.442442	0.972222
0.443443	0.972222
0.444444	0.972222
0.445445	0.972222
0.446446	0.972222
0.447447	0.972222
0.448448	0.972222
0.449449	0.972222
0.45045	0.972222
0.451451	0.972222
0.452452	0.972222
0.453453	0.972222
0.454454	0.972222
0.455455	0.972222
0.456456	0.972222
0.457457	0.972222
0.458458	0.972222
0.459459	0.972222
0.46046	0.972222
0.461461	0.972222
0.462462	0.972222
0.463463	0.972222
0.464464	0.972222
0.465465	0.972222
0.466466	0.972222
0.467467	0.972222
0.468468	0.972222
0.469469	0.972222
0.47047	0.972222
0.471471	0.972222
0.472472	0.972222
0.473473	0.972222
0.474474	0.972222
0.475475	0.972222
0.476477	0.972222
0.477477	0.972222
0.478478	0.972222
0.47948	0.972222
0.48048	0.972222
0.481482	0.972222
0.482482	0.972222
0.483484	0.972222
0.484484	0.972222
0.485486	0.972222
0.486486	0.972222
0.487488	0.972222
0.488488	0.972222
0.48949	0.972222
0.49049	0.972222
0.491492	0.972222
0.492492	0.972222
0.493493	0.972222
0.494495	0.972222
0.495495	0.972222
0.496497	0.972222
0.497497	0.972222
0.498499	0.972222
0.499499	0.972222
0.500501	0.972222
0.501502	0.972222
0.502502	0.972222
0.503503	0.972222
0.504505	0.972222
0.505506	0.972222
0.506506	0.972222
0.507508	0.972222
0.508509	0.972222
0.509509	0.972222
0.51051	0.972222
0.511512	0.972222
0.512513	0.972222
0.513513	0.972222
0.514514	0.972222
0.515516	0.972222
0.516517	0.972222
0.517517	0.972222
0.518518	0.972222
0.51952	0.972222
0.520521	0.972222
0.521521	0.972222
0.522523	0.972222
0.523524	0.972222
0.524524	0.972222
0.525525	0.972222
0.526527	0.972222
0.527528	0.972222
0.528528	0.972222
0.529529	0.972222
0.530531	0.972222
0.531532	0.972222
0.532532	0.972222
0.533533	0.972222
0.534535	0.972222
0.535536	0.972222
0.536536	0.972222
0.537538	0.972222
0.538539	0.972222
0.539539	0.972222
0.54054	0.972222
0.541542	0.972222
0.542543	0.972222
0.543543	0.972222
0.544544	0.972222
0.545546	0.972222
0.546547	0.972222
0.547547	0.972222
0.548548	0.972222
0.54955	0.972222
0.550551	0.972222
0.551552	0.972222
0.552553	0.972222
0.553554	0.972222
0.554555	0.972222
0.555556	0.972222
0.556557	0.972222
0.557558	0.972222
0.558559	0.972222
0.55956	0.972222
0.560561	0.972222
0.561562	0.972222
0.562563	0.972222
0.563564	0.972222
0.564565	0.972222
0.565566	0.972222
0.566567	0.972222
0.567568	0.972222
0.568569	0.968391
0.56957	0.968391
0.570571	0.968391
0.571572	0.968391
0.572573	0.968391
0.573574	0.968391
0.574575	0.968391
0.575576	0.968391
0.576577	0.968391
0.577578	0.968391
0.578579	0.968391
0.57958	0.968391
0.580581	0.968391
0.581582	0.968391
0.582583	0.968391
0.583584	0.968391
0.584585	0.968391
0.585586	0.968391
0.586587	0.968391
0.587588	0.968391
0.588589	0.968391
0.58959	0.968391
0.590591	0.968391
0.591592	0.968391
0.592593	0.968391
0.593594	0.968391
0.594595	0.968391
0.595596	0.968391
0.596597	0.968391
0.597598	0.968391
0.598599	0.968391
0.5996	0.968391
0.600601	0.968391
0.601602	0.968391
0.602603	0.968391
0.603604	0.968391
0.604605	0.968391
0.605606	0.968391
0.606607	0.968391
0.607608	0.968391
0.608609	0.968391
0.60961	0.968391
0.610611	0.968391
0.611612	0.968391
0.612613	0.968391
0.613614	0.968391
0.614615	0.968391
0.615616	0.968391
0.616617	0.968391
0.617618	0.968391
0.618619	0.968391
0.61962	0.968391
0.620621	0.968391
0.621622	0.968391
0.622623	0.968391
0.623624	0.968391
0.624625	0.968391
0.625626	0.968391
0.626627	0.968391
0.627628	0.968391
0.628629	0.968391
0.62963	0.968391
0.630631	0.968391
0.631632	0.968391
0.632633	0.968391
0.633634	0.968391
0.634635	0.968391
0.635636	0.968391
0.636637	0.968391
0.637638	0.968391
0.638639	0.968391
0.63964	0.968391
0.640641	0.968391
0.641642	0.968391
0.642643	0.968391
0.643644	0.968391
0.644645	0.968391
0.645646	0.968391
0.646647	0.968391
0.647648	0.968391
0.648649	0.968391
0.64965	0.968391
0.650651	0.968391
0.651652	0.968391
0.652653	0.968391
0.653654	0.968391
0.654655	0.968391
0.655656	0.968391
0.656657	0.968391
0.657658	0.968391
0.658659	0.968391
0.65966	0.968391
0.660661	0.968391
0.661662	0.968391
0.662663	0.968391
0.663664	0.968391
0.664665	0.968391
0.665666	0.968391
0.666667	0.968391
0.667668	0.968391
0.668669	0.968391
0.66967	0.968391
0.670671	0.968391
0.671672	0.968391
0.672673	0.968391
0.673674	0.968391
0.674675	0.968391
0.675676	0.968391
0.676677	0.968391
0.677678	0.968391
0.678679	0.968391
0.67968	0.968391
0.680681	0.968391
0.681682	0.968391
0.682683	0.968391
0.683684	0.968391
0.684685	0.968391
0.685686	0.968391
0.686687	0.968391
0.687688	0.968391
0.688689	0.968391
0.68969	0.968391
0.690691	0.968391
0.691692	0.968391
0.692693	0.968391
0.693694	0.968391
0.694695	0.968391
0.695696	0.968391
0.696697	0.968391
0.697698	0.968391
0.698699	0.968391
0.6997	0.968391
0.700701	0.968391
0.701702	0.968391
0.702703	0.968391
0.703704	0.968391
0.704705	0.968391
0.705706	0.968391
0.706707	0.968391
0.707708	0.968391
0.708709	0.968391
0.70971	0.968391
0.710711	0.968391
0.711712	0.968391
0.712713	0.968391
0.713714	0.968391
0.714715	0.968391
0.715716	0.968391
0.716717	0.968391
0.717718	0.968391
0.718719	0.968391
0.71972	0.968391
0.720721	0.968391
0.721722	0.968391
0.722723	0.968391
0.723724	0.968391
0.724725	0.968391
0.725726	0.968391
0.726727	0.968391
0.727728	0.968391
0.728729	0.968391
0.72973	0.968391
0.730731	0.968391
0.731732	0.968391
0.732733	0.968391
0.733734	0.968391
0.734735	0.968391
0.735736	0.968391
0.736737	0.968391
0.737738	0.968391
0.738739	0.968391
0.73974	0.968391
0.740741	0.968391
0.741742	0.968391
0.742743	0.968391
0.743744	0.968391
0.744745	0.968391
0.745746	0.968391
0.746747	0.968391
0.747748	0.968391
0.748749	0.968391
0.74975	0.968391
0.750751	0.968391
0.751752	0.968391
0.752753	0.968391
0.753754	0.968391
0.754755	0.968391
0.755756	0.968391
0.756757	0.968391
0.757758	0.968391
0.758759	0.968391
0.75976	0.968391
0.760761	0.968391
0.761762	0.968391
0.762763	0.968391
0.763764	0.968391
0.764765	0.968391
0.765766	0.968391
0.766767	0.968391
0.767768	0.968391
0.768769	0.968391
0.76977	0.968391
0.770771	0.968391
0.771772	0.968391
0.772773	0.968391
0.773774	0.968391
0.774775	0.968391
0.775776	0.968391
0.776777	0.968391
0.777778	0.968391
0.778779	0.968391
0.77978	0.968391
0.780781	0.968391
0.781782	0.968391
0.782783	0.968391
0.783784	0.968391
0.784785	0.968391
0.785786	0.968391
0.786787	0.968391
0.787788	0.968391
0.788789	0.968391
0.78979	0.968391
0.790791	0.968391
0.791792	0.968391
0.792793	0.968391
0.793794	0.968391
0.794795	0.968391
0.795796	0.968391
0.796797	0.968391
0.797798	0.968391
0.798799	0.968391
0.7998	0.968391
0.800801	0.968391
0.801802	0.968391
0.802803	0.968391
0.803804	0.968391
0.804805	0.968391
0.805806	0.968391
0.806807	0.968391
0.807808	0.968391
0.808809	0.968391
0.80981	0.968391
0.810811	0.968391
0.811812	0.968391
0.812813	0.968391
0.813814	0.968391
0.814815	0.968391
0.815816	0.968391
0.816817	0.968391
0.817818	0.968391
0.818819	0.968391
0.81982	0.968391
0.820821	0.968391
0.821822	0.968391
0.822823	0.968391
0.823824	0.968391
0.824825	0.968391
0.825826	0.968391
0.826827	0.968391
0.827828	0.968391
0.828829	0.968391
0.82983	0.968391
0.830831	0.968391
0.831832	0.968391
0.832833	0.968391
0.833834	0.968391
0.834835	0.968391
0.835836	0.968391
0.836837	0.968391
0.837838	0.968391
0.838839	0.968391
0.83984	0.968391
0.840841	0.968391
0.841842	0.968391
0.842843	0.968391
0.843844	0.968391
0.844845	0.968391
0.845846	0.968391
0.846847	0.968391
0.847848	0.968391
0.848849	0.968391
0.84985	0.968391
0.850851	0.968391
0.851852	0.968391
0.852853	0.968391
0.853854	0.968391
0.854855	0.968391
0.855856	0.968391
0.856857	0.968391
0.857858	0.968391
0.858859	0.968391
0.85986	0.968391
0.860861	0.968391
0.861862	0.968391
0.862863	0.968391
0.863864	0.968391
0.864865	0.968391
0.865866	0.968391
0.866867	0.968391
0.867868	0.968391
0.868869	0.968391
0.86987	0.968391
0.870871	0.968391
0.871872	0.968391
0.872873	0.968391
0.873874	0.968391
0.874875	0.968391
0.875876	0.968391
0.876877	0.968391
0.877878	0.968391
0.878879	0.968391
0.87988	0.968391
0.880881	0.968391
0.881882	0.968391
0.882883	0.968391
0.883884	0.968391
0.884885	0.968391
0.885886	0.968391
0.886887	0.968391
0.887888	0.968391
0.888889	0.968391
0.88989	0.968391
0.890891	0.968391
0.891892	0.968391
0.892893	0.968391
0.893894	0.968391
0.894895	0.968391
0.895896	0.968391
0.896897	0.968391
0.897898	0.968391
0.898899	0.968391
0.8999	0.968391
0.900901	0.968391
0.901902	0.968391
0.902903	0.968391
0.903904	0.968391
0.904905	0.968391
0.905906	0.968391
0.906907	0.968391
0.907908	0.968391
0.908909	0.968391
0.90991	0.968391
0.910911	0.968391
0.911912	0.968391
0.912913	0.968391
0.913914	0.968391
0.914915	0.968391
0.915916	0.968391
0.916917	0.968391
0.917918	0.968391
0.918919	0.968391
0.91992	0.968391
0.920921	0.968391
0.921922	0.968391
0.922923	0.968391
0.923924	0.968391
0.924925	0.968391
0.925926	0.968391
0.926927	0.968391
0.927928	0.968391
0.928929	0.968391
0.92993	0.968391
0.930931	0.968391
0.931932	0.968391
0.932933	0.968391
0.933934	0.968391
0.934935	0.95915
0.935936	0.95915
0.936937	0.95915
0.937938	0.95915
0.938939	0.95915
0.93994	0.95915
0.940941	0.95915
0.941942	0.95915
0.942943	0.861037
0.943944	0.860812
0.944945	0.860588
0.945946	0.860364
0.946947	0.86014
0.947948	0.859916
0.948949	0.859692
0.94995	0.859468
0.950951	0.859244
0.951952	0.85902
0.952953	0.858796
0.953954	0.858572
0.954955	0.858348
0.955956	0.858123
0.956957	0.857899
0.957958	0.857675
0.958959	0.857451
0.95996	0.857227
0.960961	0.857003
0.961962	0.856779
0.962963	0.856555
0.963964	0.856331
0.964965	0.856106
0.965966	0.855882
0.966967	0.855658
0.967968	0.855434
0.968969	0.85521
0.96997	0.854986
0.970971	0.854762
0.971972	0.854538
0.972973	0.854314
0.973974	0.85409
0.974975	0.853866
0.975976	0.853642
0.976977	0.853417
0.977978	0.853193
0.978979	0.852969
0.97998	0.852745
0.980981	0.804902
0.981982	0.804678
0.982983	0.804454
0.983984	0.80423
0.984985	0.804006
0.985986	0.803782
0.986987	0.803557
0.987988	0.803333
0.988989	0.803109
0.98999	0.802885
0.990991	0.802661
0.991992	0.802437
0.992993	0.802213
0.993994	0.801989
0.994995	0.801765
0.995996	0.801541
0.996997	0.801317
0.997998	0.801092
0.998999	0.800868
1	0.800644
1	0

## Sheet: Fig.S1f
mAP [.5]	0.968
mAP[.5:.95]	0.894
