# Supplementary material for: Multi-dimensional social relationships shape social attention in monkeys
Source: eLife. 2025 Mar 7;14:RP104460. doi: 10.7554/eLife.104460 (PMC11888598; doi:10.7554/eLife.104460)
Supplement: Figure 1—source data 1. [file elife-104460-fig1-data1.xlsx]

## Sheet: Fig.1b
partner	sesssion 1
grooming (s)	3398	3399	3400	3401	3402	3403	3404	3405	3406	3407	3408	3409	3410	3411	3412	3413	3414	3415	3416	3417	3418	3419	3420	3421	3422	3423	3424	3425	3426	3427	3428	3429	3430	3431	3432	3433	3434	3435	3436	3437	3438	3439	3440	3441	3442	3443	3444	3445	3446
fighting (s)
near (s)	9	10	12	13	14	15	16	17	18	19	20	21	22	23	24	25	26	27	28	29	30	31	32	33	48	49	52	53	54	55	56	57	58	59	60	61	62	63	64	65	66	67	68	69	70	71	72	73	74
partner	sesssion 2
grooming (s)
fighting (s)	7408	7409	7410	7411	7412	7413	7414	7415	7416	7417	7418	7419	7420	7421	7422	7423	7424	7425	7426	7427	7428	7429	7430	7431	7432	7433	7434	7435	7436	7437	7438	7439	7440	7441	7442	7443	7444	7518	7519	7520	7521	7522	7523	7524	7525	7526	7527	7528	7900
near (s)	6	7	8	10	11	12	13	14	15	16	17	18	19	20	21	22	130	131	132	133	134	135	136	137	138	177	178	179	180	181	182	183	184	185	186	187	188	189	190	191	192	193	194	195	196	197	198	199	200
actor	sesssion 1
grooming (s)	171	172	173	174	175	176	177	178	179	180	181	182	183	184	185	186	187	188	189	190	191	192	193	194	195	196	197	198	199	200	201	202	203	204	205	206	207	208	209	210	211	212	213	214	215	216	217	218	219
fighting (s)
near (s)	43	44	45	46	47	48	49	50	51	52	53	54	55	56	57	58	59	60	61	62	63	64	65	66	70	71	72	73	74	75	76	77	78	79	80	81	82	83	84	85	86	87	88	90	91	92	93	94	95
actor	sesssion 2
grooming (s)	22	23	24	25	26	27	28	29	30	31	32	33	34	35	36	37	38	39	40	41	42	43	44	45	46	47	48	49	50	51	52	53	54	55	56	57	58	59	60	61	62	63	64	65	66	67	68	69	70
fighting (s)	7458	7459	7460	7461	7462	7463	7464	7465	7466	7467	7468	7469	7470	7471	7472	7473	7474	7475	7476	7477	7478	7479	7480	7481	7482	7483	7484	7485	7486	7487	7488	7489	7490	7491	7492	7493	7494	7495	7804	7805	7806	7807	7808	7809	7810	7811	7812	7813	7814
near (s)	7	8	9	10	11	12	13	14	15	16	17	18	19	20	21	22	136	137	138	139	140	141	142	143	144	145	146	147	148	149	287	288	289	290	291	293	294	299	300	338	339	342	345	346	347	348	350	362	363
[truncated: 5,000 more columns]

## Sheet: Fig.1c
	aggression	grooming	proximity
ML	3.54	1.41	11
MK	0.82	3.91	11.53

## Sheet: Fig.1d
	a-c	c-a	c-l	l-c	l-k	k-l	a-k	k-a
aggression (‰)	0.22	2.72	0.82	0.17	3.54	0.82	0	0

## Sheet: Fig.1e
	a-c	c-a	c-l	l-c	l-k	k-l	a-k	k-a
grooming (%)	0	0	0	0	1.41	3.91	0	0

## Sheet: Fig.1f
	a-c	c-a	c-l	l-c	l-k	k-l	a-k	k-a
proximity (%)	10.62	21.25	8.58	7.28	11	11.53	6.76	1.81

## Sheet: Fig.1h
MA	MK	ML	MC
-4	-2	2	4

## Sheet: Fig.1i
social engagement index	MA	MK	ML	MC
	-4	-2	2	4
individual engagement index		MA	MK	ML			MA	MK	MC			MA	ML	MC			MK	ML	MC
	MC	-2	0	-2		ML	-3	-1	2		MK	1	1	0		MA	-1	3	2
