# Supplementary material for: Multi-dimensional social relationships shape social attention in monkeys
Source: eLife. 2025 Mar 7;14:RP104460. doi: 10.7554/eLife.104460 (PMC11888598; doi:10.7554/eLife.104460)
Supplement: Figure 2—source data 1. [file elife-104460-fig2-data1.xlsx]

## Sheet: Fig.2c
congruent -eye position	intact (deg)			scramble(deg)			congruent -eye velocity	intact (deg/s)		scramble (deg/s)
	0	0		0	0			1.69575		2.96562
	-0.00165591	-0.00112763		-0.00207058	0.00153236			1.74611		2.93976
	-0.00315014	-0.00231613		-0.0041268	0.0029427			1.77187		2.91358
	-0.00447755	-0.00355233		-0.0061548	0.00423736			1.77246		2.88151
	-0.00563638	-0.00482214		-0.0081349	0.00542578			1.74912		2.83714
	-0.00662368	-0.00610884		-0.0100442	0.00651785			1.70487		2.77615
	-0.00743448	-0.00739328		-0.011861	0.00752503			1.64265		2.69822
	-0.00806514	-0.00865783		-0.0135678	0.00846163			1.56432		2.60519
	-0.00851755	-0.00988954		-0.0151507	0.00934224			1.47172		2.49819
	-0.00879883	-0.0110802		-0.0165987	0.0101793			1.36861		2.37675
	-0.00891715	-0.0122257		-0.0179026	0.0109843			1.26073		2.23985
	-0.00888155	-0.0133252		-0.0190551	0.0117705			1.15393		2.08788
	-0.00870578	-0.0143805		-0.0200529	0.012552			1.05234		1.92274
	-0.00840918	-0.0153954		-0.0208988	0.0133405			0.956479		1.74698
	-0.00801494	-0.016375		-0.0216021	0.0141433			0.863369		1.56482
	-0.00754828	-0.0173248		-0.022177	0.0149641			0.769428		1.38233
	-0.0070339	-0.0182508		-0.0226396	0.0158057			0.673427		1.20555
	-0.00649329	-0.0191581		-0.0230044	0.0166707			0.57558		1.0387
	-0.00594416	-0.0200509		-0.0232829	0.0175605			0.474733		0.882426
	-0.00540071	-0.0209319		-0.0234838	0.018475			0.369376		0.734767
	-0.00487398	-0.0218011		-0.0236127	0.0194121			0.259629		0.595159
	-0.00437218	-0.0226564		-0.0236715	0.0203671			0.146347		0.465459
	-0.00390102	-0.023492		-0.0236601	0.0213321			0.0302235		0.348113
	-0.00346401	-0.0242993		-0.0235785	0.0222953			-0.0871749		0.245277
	-0.00306274	-0.0250695		-0.0234292	0.0232409			-0.201424		0.158891
	-0.00269716	-0.0257944		-0.023215	0.0241487			-0.306129		0.0907369
	-0.00236582	-0.0264657		-0.0229366	0.0249979			-0.39765		0.0415368
	-0.0020661	-0.0270738		-0.0225923	0.0257723			-0.476961		0.00907239
	-0.00179439	-0.0276099		-0.0221814	0.0264635			-0.544795		-0.0108228
	-0.00154633	-0.0280675		-0.021706	0.0270702			-0.597758		-0.0204068
	-0.00131691	-0.0284436		-0.0211697	0.0275953			-0.631168		-0.0190567
	-0.00110067	-0.0287387		-0.0205748	0.0280424			-0.641901		-0.00518123
	-0.000891848	-0.0289555		-0.0199216	0.0284148			-0.628369		0.0218594
	-0.000684464	-0.029101		-0.0192089	0.0287157			-0.591477		0.0588678
	-0.0004725	-0.0291876		-0.0184346	0.0289512			-0.534627		0.0978348
	-0.00025001	-0.0292298		-0.0175955	0.029132			-0.460864		0.130714
	-1.12513e-05	-0.0292351		-0.0166885	0.0292712			-0.370034		0.154198
	0.000249175	-0.0291986		-0.0157106	0.0293817			-0.259786		0.168735
	0.000536177	-0.0291045		-0.0146598	0.0294744			-0.129466		0.175644
	0.000854008	-0.0289332		-0.0135354	0.0295589			0.0198133		0.176141
	0.00120609	-0.0286677		-0.0123391	0.0296419			0.188933		0.171337
	0.00159482	-0.028298		-0.0110749	0.0297258			0.380674		0.162234
	0.00202135	-0.0278218		-0.00975089	0.0298081			0.595775		0.149734
	0.00248536	-0.027245		-0.00837899	0.0298835			0.831858		0.134637
	0.00298476	-0.026582		-0.00697552	0.029946			1.08521		0.117655
	0.00351546	-0.0258548		-0.00555787	0.0299902			1.35161		0.0994148
	0.00407006	-0.0250899		-0.00414066	0.0300119			1.62616		0.0804738
	0.00463467	-0.0243129		-0.0027356	0.0300066			1.90313		0.0613275
	0.00518762	-0.0235448		-0.00135337	0.0299719			2.17675		0.0424222
	0.00570389	-0.0228021		-3.47846e-06	0.0299098			2.44393		0.0241667
	0.0061596	-0.0220967		0.00130489	0.0298282			2.70503		0.00694321
	0.00653074	-0.0214368		0.00256106	0.0297397			2.95986		-0.00888086
	0.00679096	-0.0208271		0.00375403	0.0296588			3.20564		-0.022943
	0.00691327	-0.020269		0.00487453	0.0295992			3.43968		-0.0348757
	0.00687185	-0.0197614		0.00591528	0.0295717			3.66115		-0.0442981
	0.00663999	-0.019301		0.00687032	0.0295817			3.87098		-0.0508086
	0.00618732	-0.0188822		0.00773433	0.0296268			4.0707		-0.0539794
	0.00547991	-0.0184977		0.00850208	0.0297002			4.2614		-0.0533525
	0.00448346	-0.0181388		0.0091679	0.0297952			4.44456		-0.0484379
	0.00316567	-0.0177964		0.00972518	0.0299059			4.6219		-0.0387142
	0.00149491	-0.0174643		0.010167	0.0300259			4.7934		-0.0245908
	-0.000561812	-0.0171413		0.0104894	0.0301465			4.95716		-0.00933212
	-0.00303877	-0.0168292		0.0106964	0.030257			5.11215		0.00189426
	-0.00597026	-0.0165304		0.0107991	0.0303448			5.26008		0.00584569
	-0.00938811	-0.0162473		0.0108114	0.030396			5.40336		0.00215795
	-0.013317	-0.015982		0.0107456	0.0303982			5.54211		-0.00857534
	-0.0177694	-0.0157369		0.010612	0.0303437			5.67412		-0.0257597
	-0.0227414	-0.0155144		0.0104192	0.0302301			5.7976		-0.0487936
	-0.0282071	-0.0153178		0.0101777	0.0300595			5.91305		-0.0770575
	-0.0341122	-0.0151497		0.00990125	0.0298358			6.02122		-0.109901
	-0.0403705	-0.0150096		0.0096059	0.0295626			6.12023		-0.146624
	-0.0468599	-0.0148921		0.00930662	0.0292448			6.20544		-0.186458
	-0.0534182	-0.0147888		0.00901679	0.0288872			6.27231		-0.228545
	-0.0598399	-0.0146914		0.00874838	0.0284913			6.31823		-0.271909
	-0.0658719	-0.0145925		0.00851204	0.0280543			6.34155		-0.315437
	-0.0712085	-0.0144859		0.00831735	0.0275714			6.34157		-0.357846
	-0.0754853	-0.0143665		0.00817289	0.0270382			6.31942		-0.397661
	-0.0782737	-0.0142303		0.0080864	0.0264522			6.27621		-0.433187
	-0.0790806	-0.0140749		0.00806485	0.0258141			6.21107		-0.463448
	-0.0773497	-0.0138991		0.00811452	0.0251264			6.12315		-0.490078
	-0.0724621	-0.013703		0.00824095	0.024395			6.01352		-0.516347
	-0.0637375	-0.0134887		0.00844896	0.02363			5.88336		-0.543306
	-0.0504364	-0.0132595		0.00874256	0.0228435			5.73207		-0.568813
	-0.0317621	-0.013021		0.00912481	0.0220489			5.55927		-0.589432
	-0.00686305	-0.0127805		0.00959764	0.0212579			5.36685		-0.60138
	0.0251591	-0.0125475		0.0101616	0.0204795			5.15711		-0.601473
	0.0652357	-0.0123327		0.0108157	0.019722			4.93098		-0.589041
	0.114317	-0.0121455		0.0115568	0.0189959			4.69008		-0.565923
	0.173355	-0.0119921		0.0123794	0.0183119			4.43875		-0.534562
	0.243291	-0.0118773		0.0132753	0.0176788			4.1823		-0.496095
	0.325034	-0.0118079		0.0142327	0.0171029			3.92425		-0.449415
	0.419436	-0.0117924		0.0152371	0.0165885			3.66656		-0.394073
	0.527273	-0.0118384		0.0162731	0.0161377			3.41256		-0.334141
	0.64922	-0.0119505		0.0173272	0.0157516			3.16818		-0.276329
	0.785845	-0.0121324		0.0183877	0.0154299			2.93817		-0.224263
	0.937593	-0.0123895		0.0194441	0.0151713			2.7244		-0.175645
	1.10478	-0.0127299		0.0204868	0.0149737			2.52882		-0.125157
	1.28757	-0.0131641		0.021505	0.0148347			2.3546		-0.0702557
	1.486	-0.0137049		0.0224847	0.014751			2.20431		-0.014074
	1.69993	-0.0143671		0.0234083	0.0147193			2.07907		0.0364608
	1.92908	-0.0151673		0.0242597	0.0147358			1.97862		0.0734727
	2.17299	-0.016123		0.0250258	0.0147962			1.90144		0.0900264
	2.43109	-0.0172528		0.0256946	0.0148962			1.84477		0.0820252
	2.70263	-0.0185753		0.0262526	0.015031			1.80468		0.0482021
	2.98676	-0.0201086		0.0266862	0.0151953			1.77612		-0.0108344
	3.28248	-0.0218694		0.0269847	0.0153833			1.75387		-0.0916203
	3.5887	-0.0238721		0.0271403	0.0155888			1.73449		-0.187801
	3.90426	-0.0261277		0.0271485	0.0158047			1.71636		-0.292001
	4.22789	-0.0286427		0.0270078	0.016023			1.6987		-0.39673
	4.5583	-0.0314184		0.0267197	0.016236			1.68255		-0.495273
	4.89414	-0.0344533		0.0262886	0.0164383			1.67079		-0.583554
	5.23404	-0.0377474		0.0257224	0.0166295			1.66624		-0.659113
	5.57662	-0.0413039		0.0250324	0.0168112			1.67066		-0.718176
	5.92052	-0.045128		0.0242338	0.0169849			1.68482		-0.757532
	6.2644	-0.0492252		0.023346	0.0171503			1.70842		-0.778325
	6.60695	-0.0535985		0.0223923	0.0173064			1.74016		-0.785082
	6.94693	-0.0582461		0.0213974	0.0174543			1.77768		-0.781852
	7.28318	-0.0631597		0.0203853	0.0175988			1.81754		-0.769329
	7.6146	-0.0683252		0.0193786	0.0177468			1.85521		-0.745815
	7.9402	-0.0737259		0.0183996	0.017904			1.88505		-0.711056
	8.25908	-0.0793428		0.0174694	0.0180738			1.90124		-0.667226
	8.57044	-0.0851534		0.016606	0.0182574			1.90064		-0.61702
	8.87359	-0.091132		0.0158219	0.0184538			1.88472		-0.562729
	9.16793	-0.0972519		0.0151238	0.0186594			1.85761		-0.506264
	9.45298	-0.103486		0.0145127	0.0188689			1.82324		-0.449193
	9.72833	-0.109803		0.0139845	0.0190782			1.78441		-0.392772
	9.99367	-0.116171		0.0135308	0.0192861			1.7428		-0.337982
	10.2488	-0.122558		0.0131385	0.0194922			1.69901		-0.285562
	10.4935	-0.128927		0.0127907	0.019695			1.65254		-0.236044
	10.7278	-0.135243		0.0124664	0.0198935			1.60187		-0.189781
	10.9517	-0.141466		0.0121414	0.0200893			1.54448		-0.146984
	11.1652	-0.147555		0.0117877	0.020284			1.47779		-0.107742
	11.3685	-0.153475		0.0113744	0.020477			1.40118		-0.0720575
	11.5617	-0.159197		0.0108676	0.0206636			1.31504		-0.0398617
	11.7451	-0.164699		0.0102307	0.0208364			1.21794		-0.0110425
	11.9189	-0.169964		0.00942467	0.020988			1.1086		0.0145381
	12.0834	-0.174982		0.0084096	0.0211135			0.989804		0.0370257
	12.239	-0.17975		0.00714787	0.0212124			0.867488		0.0565582
	12.3859	-0.18427		0.00560685	0.0212908			0.747938		0.0732515
	12.5246	-0.188546		0.00375768	0.0213599			0.636912		0.0871878
	12.6554	-0.192583		0.00157339	0.0214315			0.538745		0.098405
	12.7786	-0.196387		-0.000970907	0.0215138			0.453539		0.106889
	12.8946	-0.199967		-0.00389671	0.0216108			0.376268		0.112564
	13.0038	-0.203338		-0.00722052	0.0217219			0.301626		0.115293
	13.1066	-0.206514		-0.0109521	0.0218428			0.228867		0.114867
	13.2032	-0.209513		-0.0150922	0.0219688			0.159941		0.11101
	13.294	-0.21235		-0.0196308	0.0220958			0.0937767		0.103376
	13.3794	-0.215042		-0.0245439	0.0222192			0.0244079		0.0915507
	13.4597	-0.217606		-0.0297913	0.0223302			-0.0541871		0.0750588
	13.5352	-0.220061		-0.0353131	0.0224164			-0.143247		0.0533699
	13.6062	-0.222426		-0.0410271	0.0224639			-0.240138		0.0259094
	13.6729	-0.224716		-0.0468247	0.0224599			-0.341177		-0.00792882
	13.7356	-0.226945		-0.0525683	0.022391			-0.44253		-0.0487643
	13.7947	-0.229124		-0.0580868	0.0222449			-0.541117		-0.0962508
	13.8502	-0.231266		-0.063173	0.0220135			-0.636459		-0.147133
	13.9025	-0.233378		-0.0675798	0.0216938			-0.72967		-0.196176
	13.9518	-0.235467		-0.0710171	0.0212824			-0.81955		-0.239976
	13.9981	-0.237536		-0.0731497	0.0207728			-0.901579		-0.277884
	14.0418	-0.239594		-0.0735946	0.0201538			-0.970735		-0.310068
	14.083	-0.241646		-0.0719204	0.0194103			-1.02432		-0.336526
	14.1218	-0.243693		-0.0676467	0.0185239			-1.06194		-0.357066
	14.1583	-0.245733		-0.0602446	0.0174726			-1.08446		-0.371294
	14.1927	-0.247766		-0.0491366	0.0162321			-1.09405		-0.378596
	14.2251	-0.249794		-0.0336983	0.0147761			-1.09221		-0.378133
	14.2556	-0.251821		-0.0132627	0.0130772			-1.07879		-0.369797
	14.2843	-0.253844		0.012877	0.0111076			-1.05493		-0.356126
	14.3114	-0.255858		0.0454633	0.0088404			-1.02396		-0.34135
	14.337	-0.257851		0.0852636	0.00625067			-0.989529		-0.327564
	14.3612	-0.259818		0.133057	0.00331687			-0.954665		-0.313775
	14.3841	-0.261753		0.189623	2.15281e-05			-0.921784		-0.297831
	14.4057	-0.263658		0.255735	-0.00365083			-0.892716		-0.277387
	14.4262	-0.265535		0.332143	-0.00771738			-0.868725		-0.249916
	14.4457	-0.267391		0.419558	-0.0121986			-0.850526		-0.212726
	14.4642	-0.26923		0.518641	-0.0171167			-0.838296		-0.16297
	14.4817	-0.271058		0.629984	-0.022493			-0.831691		-0.0986369
	14.4985	-0.272879		0.7541	-0.0283455			-0.82985		-0.020496
	14.5144	-0.274693		0.891414	-0.0346888			-0.831399		0.0678624
	14.5296	-0.276498		1.04226	-0.0415335			-0.834455		0.160939
	14.5441	-0.27829		1.20686	-0.0488837			-0.836624		0.251274
	14.5579	-0.280066		1.38534	-0.0567371			-0.835958		0.332267
	14.5711	-0.281826		1.5777	-0.0650868			-0.833834		0.401964
	14.5837	-0.283568		1.78382	-0.0739239			-0.83591		0.462044
	14.5958	-0.285296		2.00345	-0.0832361			-0.847334		0.514905
	14.6073	-0.28701		2.23622	-0.0930073			-0.867939		0.562661
	14.6182	-0.288711		2.48164	-0.103215			-0.893202		0.607111
	14.6287	-0.290401		2.73911	-0.113829			-0.917104		0.649712
	14.6386	-0.292086		3.00791	-0.124818			-0.933079		0.691547
	14.6481	-0.293769		3.2872	-0.136144			-0.934961		0.733301
	14.6571	-0.295455		3.57608	-0.147767			-0.91985		0.775236
	14.6657	-0.297148		3.87354	-0.159644			-0.890033		0.81716
	14.6738	-0.298848		4.17853	-0.171727			-0.850114		0.85841
	14.6815	-0.300552		4.48993	-0.183963			-0.802235		0.897818
	14.6887	-0.302254		4.80658	-0.1963			-0.746101		0.93369
	14.6956	-0.303941		5.12729	-0.208681			-0.682845		0.963785
	14.702	-0.305599		5.45085	-0.221047			-0.616022		0.985288
	14.708	-0.307218		5.77607	-0.233341			-0.549728		0.995753
	14.7136	-0.308792		6.10175	-0.245517			-0.486721		0.995013
	14.7189	-0.310322		6.42672	-0.257536			-0.425585		0.98421
	14.7239	-0.311814		6.74986	-0.269371			-0.359808		0.96196
	14.7285	-0.313276		7.07007	-0.280995			-0.282619		0.92436
	14.7329	-0.314721		7.38634	-0.292384			-0.191825		0.868839
	14.7371	-0.316162		7.69772	-0.303516			-0.0889011		0.795144
	14.741	-0.317614		8.00332	-0.314374			0.0238347		0.70345
	14.7448	-0.319093		8.30234	-0.324946			0.144114		0.593451
	14.7484	-0.320612		8.59408	-0.335225			0.269653		0.465374
	14.7519	-0.322186		8.8779	-0.345201			0.398077		0.321965
	14.7552	-0.323823		9.15327	-0.354869			0.526844		0.168566
	14.7584	-0.325531		9.41973	-0.36422			0.653169		0.0112815
	14.7614	-0.327313		9.67694	-0.373248			0.773945		-0.143883
	14.7644	-0.32917		9.92461	-0.381945			0.885663		-0.290932
	14.7673	-0.331104		10.1626	-0.39031			0.984344		-0.424742
	14.77	-0.33311		10.3907	-0.39834			1.06643		-0.542892
	14.7728	-0.335184		10.609	-0.406039			1.13063		-0.644625
	14.7754	-0.33732		10.8174	-0.413411			1.17695		-0.726936
	14.778	-0.339516		11.0161	-0.420462			1.20371		-0.784512
	14.7805	-0.34177		11.2053	-0.427204			1.2095		-0.814481
	14.783	-0.344086		11.385	-0.433653			1.19696		-0.819249
	14.7854	-0.346462		11.5555	-0.439827			1.17089		-0.804568
	14.7878	-0.3489		11.7172	-0.44575			1.13341		-0.776653
	14.7901	-0.351395		11.8702	-0.451439			1.08403		-0.741229
	14.7924	-0.353945		12.0148	-0.456915			1.02348		-0.703544
	14.7946	-0.356552		12.1515	-0.462196			0.954713		-0.668394
	14.7968	-0.359217		12.2805	-0.467303			0.880995		-0.639183
	14.799	-0.361939		12.4022	-0.472257			0.805025		-0.615068
	14.8011	-0.364708		12.5169	-0.477074			0.728955		-0.590013
	14.8031	-0.367505		12.6249	-0.481765			0.654447		-0.557607
	14.805	-0.370307		12.7267	-0.486333			0.582711		-0.515875
	14.8069	-0.373091		12.8224	-0.490782			0.514557		-0.466339
	14.8087	-0.375832		12.9125	-0.495114			0.450434		-0.411164
	14.8103	-0.378505		12.9972	-0.499327			0.390477		-0.352231
	14.8119	-0.381091		13.0768	-0.503421			0.334541		-0.291172
	14.8134	-0.383576		13.1515	-0.507395			0.28224		-0.229402
	14.8148	-0.385955		13.2217	-0.511255			0.232983		-0.168155
	14.8161	-0.388227		13.2876	-0.515007			0.186962		-0.108529
	14.8172	-0.390393		13.3495	-0.518657			0.147104		-0.0515141
	14.8182	-0.392457		13.4076	-0.522209			0.118137		0.00196502
	14.8192	-0.394419		13.4621	-0.525667			0.102777		0.0510169
	14.8199	-0.396278		13.5133	-0.529035			0.100785		0.0947502
	14.8206	-0.398033		13.5614	-0.532315			0.110898		0.132244
	14.8211	-0.399682		13.6065	-0.535511			0.131786		0.16252
	14.8215	-0.401221		13.6488	-0.538626			0.162048		0.184524
	14.8218	-0.402648		13.6886	-0.541666			0.200198		0.1971
	14.8221	-0.403962		13.7259	-0.544633			0.24465		0.198986
	14.8222	-0.405171		13.761	-0.547527			0.293693		0.1888
	14.8223	-0.406286		13.794	-0.550342			0.345463		0.165042
	14.8223	-0.407314		13.8249	-0.55307			0.397915		0.1261
	14.8223	-0.408259		13.8541	-0.555706			0.448793		0.071225
	14.8223	-0.409122		13.8815	-0.558247			0.495597		0.00247235
	14.8223	-0.4099		13.9074	-0.560695			0.535552		-0.0762236
	14.8223	-0.410594		13.9317	-0.563052			0.565582		-0.162845
	14.8222	-0.411206		13.9547	-0.56532			0.582283		-0.257244
	14.8222	-0.411743		13.9763	-0.567501			0.582871		-0.357251
	14.8222	-0.412214		13.9968	-0.569593			0.567082		-0.458619
	14.8222	-0.41263		14.0162	-0.57159			0.536221		-0.5588
	14.8223	-0.413002		14.0346	-0.573483			0.49029		-0.657841
	14.8224	-0.413336		14.052	-0.57526			0.428965		-0.755448
	14.8225	-0.413639		14.0686	-0.576911			0.353545		-0.848044
	14.8228	-0.413915		14.0844	-0.578433			0.266987		-0.929673
	14.8231	-0.414172		14.0995	-0.579828			0.174914		-0.995782
	14.8235	-0.414415		14.1139	-0.581102			0.0847032		-1.04413
	14.8239	-0.414644		14.1276	-0.582266			0.000746873		-1.07281
	14.8245	-0.414856		14.1407	-0.583332			-0.0774119		-1.08028
	14.8251	-0.41505		14.1533	-0.584316			-0.151191		-1.06719
	14.8258	-0.415224		14.1652	-0.585234			-0.220045		-1.03545
	14.8266	-0.415378		14.1765	-0.586105			-0.282378		-0.985387
	14.8275	-0.415514		14.1873	-0.586945			-0.337418		-0.916675
	14.8285	-0.415631		14.1976	-0.587774			-0.386142		-0.829359
	14.8295	-0.415733		14.2073	-0.588608			-0.429322		-0.721965
	14.8307	-0.41582		14.2165	-0.589462			-0.466535		-0.592515
	14.8318	-0.415897		14.2251	-0.590345			-0.498055		-0.440515
	14.8331	-0.415966		14.2333	-0.591259			-0.523873		-0.267031
	14.8345	-0.416031		14.241	-0.592198			-0.541755		-0.0757439
	14.8358	-0.416096		14.2483	-0.593153			-0.548192		0.126949
	14.8373	-0.416164		14.2552	-0.59411			-0.540302		0.334691
	14.8387	-0.416241		14.2617	-0.595052			-0.517752		0.543924
	14.8402	-0.41633		14.2678	-0.595961			-0.482754		0.752803
	14.8417	-0.416436		14.2735	-0.596825			-0.437212		0.958189
	14.8431	-0.416565		14.279	-0.597638			-0.379854		1.15648
	14.8445	-0.416721		14.2841	-0.598406			-0.307228		1.34542
	14.8459	-0.416909		14.289	-0.59914			-0.218531		1.52298
	14.8471	-0.417132		14.2937	-0.599854			-0.11853		1.68536
	14.8484	-0.417396		14.2981	-0.600563			-0.0147392		1.82593
	14.8496	-0.417705		14.3022	-0.601283			0.0873177		1.93797
	14.8507	-0.418061		14.3062	-0.602027			0.185003		2.01845
	14.8517	-0.418466		14.3099	-0.602809			0.276587		2.067
	14.8527	-0.418924		14.3135	-0.603646			0.360227		2.08297
	14.8536	-0.419433		14.3169	-0.604546			0.433914		2.06445
	14.8544	-0.419992		14.3202	-0.605514			0.49542		2.00925
	14.8552	-0.420599		14.3233	-0.606547			0.543215		1.91772
	14.8559	-0.421248		14.3263	-0.607642			0.578344		1.79476
	14.8566	-0.421931		14.3291	-0.608792			0.603442		1.64796
	14.8572	-0.422638		14.3319	-0.609993			0.619835		1.48473
	14.8578	-0.423355		14.3345	-0.611241			0.628477		1.31152
	14.8584	-0.424069		14.337	-0.612532			0.630907		1.13384
	14.859	-0.424776		14.3394	-0.613864			0.627318		0.956403
	14.8596	-0.425478		14.3416	-0.61523			0.617519		0.783235
	14.8602	-0.426184		14.3437	-0.616625			0.601896		0.617768
	14.8608	-0.4269		14.3458	-0.618039			0.579496		0.462949
	14.8614	-0.427631		14.3477	-0.619459			0.54996		0.321345
	14.862	-0.428378		14.3494	-0.620869			0.517371		0.195234
	14.8627	-0.429147		14.3511	-0.622252			0.48835		0.0866918
	14.8634	-0.429945		14.3528	-0.623594			0.466325		-0.00232981
	14.8641	-0.430781		14.3543	-0.624885			0.449625		-0.0699394
	14.8648	-0.431662		14.3557	-0.626117			0.436292		-0.11425
	14.8655	-0.432597		14.3571	-0.627284			0.427927		-0.13334
	14.8662	-0.43359		14.3584	-0.628385			0.425861		-0.126184
	14.867	-0.434638		14.3596	-0.62942			0.427325		-0.0945584
	14.8677	-0.435731		14.3608	-0.630388			0.429287		-0.0430492
	14.8686	-0.436854		14.362	-0.631287			0.43229		0.0218924
	14.8694	-0.437987		14.3632	-0.632119			0.43757		0.0919191
	14.8703	-0.439115		14.3643	-0.632888			0.44514		0.159628
	14.8711	-0.440223		14.3654	-0.633599			0.455702		0.222355
	14.872	-0.4413		14.3665	-0.634261			0.468725		0.280218
	14.873	-0.442334		14.3676	-0.634884			0.47956		0.331281
	14.8739	-0.443313		14.3687	-0.635478			0.482313		0.371521
	14.8747	-0.444225		14.3697	-0.636052			0.472717		0.398631
	14.8756	-0.445064		14.3708	-0.63662			0.448129		0.41296
	14.8764	-0.445829		14.3718	-0.637191			0.4085		0.415572
	14.8772	-0.446529		14.3729	-0.637776			0.356385		0.407285
	14.8779	-0.447174		14.3739	-0.638384			0.295054		0.388661
	14.8785	-0.447771		14.375	-0.639024			0.227559		0.36002
	14.8791	-0.448326		14.3761	-0.639702			0.156774		0.322401
	14.8795	-0.448844		14.3771	-0.640423			0.0854336		0.279505
	14.8798	-0.449332		14.3782	-0.641189			0.0152178		0.236754
	14.8801	-0.449796		14.3792	-0.642			-0.0551237		0.19748
	14.8803	-0.450238		14.3802	-0.642851			-0.128769		0.161991
	14.8803	-0.450656		14.3812	-0.643735			-0.206942		0.129514
	14.8803	-0.451042		14.3821	-0.644639			-0.287911		0.0991772
	14.8803	-0.451382		14.3831	-0.645548			-0.368855		0.0709849
	14.8802	-0.451663		14.384	-0.646444			-0.446778		0.0477587
	14.8801	-0.451875		14.3849	-0.647316			-0.518458		0.0341932
	14.88	-0.452017		14.3858	-0.648159			-0.580399		0.0330322
	14.8799	-0.452097		14.3867	-0.648976			-0.629753		0.0441177
	14.8798	-0.452131		14.3876	-0.649774			-0.666192		0.0663086
	14.8797	-0.452137		14.3884	-0.650554			-0.690927		0.0984331
	14.8797	-0.452135		14.3893	-0.651319			-0.703803		0.139276
	14.8797	-0.452136		14.3901	-0.652069			-0.704245		0.187558
	14.8798	-0.452146		14.3909	-0.652806			-0.693168		0.241913
	14.8799	-0.452164		14.3918	-0.653527			-0.672017		0.300859
	14.8801	-0.452185		14.3927	-0.654224			-0.641816		0.362761
	14.8803	-0.452199		14.3935	-0.65489			-0.603178		0.425802
	14.8805	-0.452202		14.3944	-0.655519			-0.556323		0.487938
	14.8808	-0.452192		14.3953	-0.65611			-0.501108		0.546868
	14.8811	-0.452165		14.3962	-0.656664			-0.437046		0.600949
	14.8814	-0.452113		14.3971	-0.657187			-0.364307		0.651081
	14.8817	-0.452024		14.398	-0.65768			-0.285672		0.699717
	14.8819	-0.451893		14.3989	-0.658143			-0.205619		0.746989
	14.8821	-0.451721		14.3999	-0.658572			-0.126532		0.790685
	14.8823	-0.451518		14.4009	-0.658965			-0.0487503		0.830052
	14.8825	-0.451298		14.4019	-0.659322			0.0255457		0.866731
	14.8826	-0.451074		14.4029	-0.659643			0.0922891		0.902812
	14.8828	-0.450852		14.4039	-0.659928			0.149318		0.938896
	14.883	-0.450635		14.405	-0.66018			0.197294		0.972152
	14.8832	-0.450419		14.4061	-0.660401			0.238707		0.997255
	14.8834	-0.450199		14.4073	-0.660593			0.277848		1.0102
	14.8837	-0.449971		14.4084	-0.660761			0.31886		1.00927
	14.8841	-0.449728		14.4097	-0.660906			0.363798		0.994013
	14.8846	-0.449466		14.4109	-0.661032			0.413561		0.966276
	14.8851	-0.44918		14.4122	-0.661143			0.468823		0.929199
	14.8857	-0.448869		14.4136	-0.66124			0.529043		0.88342
	14.8863	-0.448534		14.415	-0.661326			0.590514		0.827088
	14.887	-0.448175		14.4165	-0.661405			0.646326		0.759731
	14.8877	-0.447793		14.418	-0.661477			0.689209		0.683253
	14.8885	-0.447393		14.4196	-0.661546			0.715335		0.60005
	14.8892	-0.446977		14.4212	-0.661611			0.726216		0.512104
	14.89	-0.446551		14.4228	-0.661673			0.725803		0.421027
	14.8908	-0.446123		14.4245	-0.661734			0.715688		0.32812
	14.8916	-0.4457		14.4262	-0.661793			0.695104		0.234426
	14.8925	-0.44529		14.4279	-0.661854			0.664763		0.140785
	14.8933	-0.444901		14.4296	-0.661927			0.627834		0.0478944
	14.8941	-0.444546		14.4314	-0.662023			0.588035		-0.0436352
	14.895	-0.444237		14.4332	-0.662155			0.548704		-0.133223
	14.8958	-0.443988		14.435	-0.662335			0.512814		-0.220262
	14.8967	-0.443809		14.4367	-0.662574			0.482044		-0.304064
	14.8975	-0.44371		14.4385	-0.662881			0.454878		-0.383808
	14.8984	-0.443698		14.4403	-0.663265			0.427584		-0.458486
	14.8992	-0.443781		14.4421	-0.663733			0.39807		-0.527814
	14.9001	-0.443963		14.4439	-0.664291			0.36686		-0.594109
	14.9009	-0.444248		14.4456	-0.664944			0.335193		-0.661281
	14.9018	-0.444638		14.4474	-0.665692			0.304083		-0.730956
	14.9026	-0.445134		14.4491	-0.666536			0.274336		-0.801478
	14.9035	-0.445733		14.4507	-0.66747			0.246574		-0.869781
	14.9044	-0.446433		14.4523	-0.668489			0.221248		-0.932309
	14.9053	-0.447226		14.4539	-0.66958			0.198658		-0.985934
	14.9063	-0.448102		14.4553	-0.670727			0.178968		-1.02983
	14.9074	-0.44905		14.4567	-0.671909			0.162216		-1.0645
	14.9085	-0.45005		14.4579	-0.673104			0.148332		-1.08789
	14.9096	-0.451083		14.4591	-0.674287			0.137146		-1.09537
	14.9107	-0.452127		14.4602	-0.675437			0.128394		-1.08454
	14.9119	-0.453164		14.4612	-0.676535			0.121728		-1.05711
	14.913	-0.454187		14.4622	-0.677568			0.116722		-1.01416
	14.9142	-0.455194		14.4631	-0.678527			0.112871		-0.952266
	14.9153	-0.456191		14.4639	-0.67941			0.109603		-0.867385
	14.9163	-0.457187		14.4648	-0.680218			0.106272		-0.759703
	14.9173	-0.45819		14.4656	-0.680951			0.102168		-0.632713
	14.9182	-0.459207		14.4664	-0.681608			0.0965139		-0.490407
	14.9191	-0.460242		14.4672	-0.682187			0.0884714		-0.336393
	14.92	-0.461294		14.4679	-0.682687			0.0771434		-0.173981
	14.9208	-0.462363		14.4687	-0.68311			0.0615796		-0.00627888
	14.9216	-0.463446		14.4694	-0.683458			0.0407836		0.163712
	14.9224	-0.464539		14.4702	-0.683738			0.0127637		0.332994
	14.9232	-0.465638		14.471	-0.683956			-0.0273718		0.498467
	14.9239	-0.466735		14.4719	-0.684118			-0.0864371		0.656829
	14.9247	-0.467818		14.4728	-0.684236			-0.169305		0.804476
	14.9254	-0.468873		14.4738	-0.684318			-0.277912		0.937401
	14.9262	-0.469886		14.4749	-0.684375			-0.413123		1.05207
	14.927	-0.470842		14.4761	-0.684418			-0.575622		1.14725
	14.9278	-0.471729		14.4774	-0.684456			-0.765836		1.22299
	14.9286	-0.472536		14.4787	-0.68449			-0.983824		1.2777
	14.9295	-0.473256		14.4801	-0.684522			-1.22917		1.309
	14.9305	-0.473882		14.4815	-0.68455			-1.50085		1.3157
	14.9314	-0.474408		14.4829	-0.684576			-1.79707		1.29771
	14.9324	-0.474834		14.4844	-0.684601			-2.1151		1.25701
	14.9334	-0.47516		14.4858	-0.684625			-2.45209		1.19769
	14.9344	-0.475386		14.4873	-0.684648			-2.80672		1.12401
	14.9354	-0.475512		14.4887	-0.68466			-3.17812		1.0395
	14.9365	-0.475538		14.4901	-0.684654			-3.5627		0.947037
	14.9375	-0.475462		14.4915	-0.684617			-3.95589		0.84882
	14.9385	-0.475278		14.4928	-0.68454			-4.35573		0.746491
	14.9396	-0.474975		14.494	-0.684414			-4.76165		0.641168
	14.9406	-0.474541		14.4952	-0.684231			-5.17138		0.533511
	14.9417	-0.47397		14.4963	-0.683983			-5.58067		0.424747
	14.9427	-0.47326		14.4973	-0.683664			-5.98594		0.318653
	14.9437	-0.472409		14.4982	-0.68327			-6.38595		0.220661
	14.9446	-0.471417		14.4991	-0.6828			-6.77961		0.13409
	14.9455	-0.470286		14.4999	-0.682263			-7.16288		0.0592388
	14.9464	-0.469018		14.5006	-0.681667			-7.52851		-0.00463512
	14.9472	-0.467622		14.5012	-0.681018			-7.8687		-0.0583161
	14.9479	-0.466112		14.5018	-0.680321			-8.17776		-0.102588
	14.9486	-0.464512		14.5024	-0.679577			-8.45283		-0.138203
	14.9492	-0.462851		14.5029	-0.678787			-8.69278		-0.165851
	14.9498	-0.46116		14.5034	-0.67795			-8.89609		-0.18614
	14.9504	-0.459473		14.5039	-0.67707			-9.06069		-0.19958
	14.9509	-0.457825		14.5044	-0.676154			-9.18485		-0.206568
	14.9514	-0.456252		14.5049	-0.675215			-9.26606		-0.20738
	14.9518	-0.454791		14.5055	-0.674265			-9.30196		-0.202167
	14.9522	-0.453479		14.5062	-0.673316			-9.29408		-0.190955
	14.9526	-0.45236		14.5069	-0.672369			-9.24787		-0.173648
	14.9529	-0.451487		14.5076	-0.671425			-9.16883		-0.150034
	14.9532	-0.45092		14.5085	-0.670486			-9.06159		-0.119797
	14.9534	-0.450722		14.5095	-0.669558			-8.93092		-0.082531
	14.9535	-0.450957		14.5105	-0.668646			-8.78083		-0.0377574
	14.9536	-0.451688		14.5116	-0.667755			-8.61464		0.0150495
	14.9535	-0.452979		14.5128	-0.666891			-8.43605		0.0754774
	14.9534	-0.454888		14.514	-0.66606			-8.24826		0.140225
	14.9531	-0.45747		14.5152	-0.665264			-8.05411		0.204026
	14.9526	-0.460771		14.5165	-0.664508			-7.85711		0.263445
	14.952	-0.464833		14.5178	-0.663799			-7.65968		0.317801
	14.9511	-0.469694		14.519	-0.663145			-7.46037		0.367212
	14.9501	-0.475393		14.5202	-0.662554			-7.25399		0.411602
								-7.0346		0.450672
								-6.79855		0.48387
								-6.54553		0.510372
								-6.27776		0.529056
								-5.99828		0.538492
								-5.71105		0.536926
								-5.42211		0.522278
								-5.13784		0.4931
								-4.86224		0.450508
								-4.59711		0.398194
								-4.34511		0.340537
								-4.11182		0.280713
								-3.90399		0.218814
								-3.72679		0.151881
								-3.58299		0.0768242
								-3.47305		-0.00570199
								-3.39525		-0.0893328
								-3.34569		-0.164822
								-3.3184		-0.22575
								-3.30536		-0.271353
								-3.29743		-0.30457
								-3.28732		-0.328179
								-3.27144		-0.341894
								-3.24803		-0.343316
								-3.21525		-0.331754
								-3.1731		-0.30919
								-3.12534		-0.278366
								-3.07767		-0.241833
								-3.0348		-0.201975
								-2.99954		-0.16103
								-2.97285		-0.121111
								-2.95385		-0.0842303
								-2.93982		-0.0523274
								-2.92625		-0.0272874
								-2.90774		-0.0109612
								-2.88098		-0.00518057
								-2.8466		-0.010808
								-2.80732		-0.0258222
								-2.76505		-0.0453149
								-2.72		-0.0634016
								-2.67068		-0.0751296
								-2.61392		-0.0783863
								-2.54492		-0.0738931
								-2.45824		-0.0632846
								-2.35073		-0.0481519
								-2.22346		-0.0300488
								-2.07993		-0.0105003
								-1.92323		0.00898662
								-1.75614		0.0269113
								-1.58312		0.041768
								-1.4095		0.0520357
								-1.23771		0.0561689
								-1.06738		0.0525921
								-0.899331		0.0396977
								-0.735611		0.0158487
								-0.575819		-0.020613
								-0.416217		-0.0713512
								-0.252715		-0.138013
								-0.0848022		-0.222196
								0.083387		-0.325409
								0.246813		-0.448058
								0.401345		-0.587467
								0.541745		-0.738762
								0.663492		-0.898622
								0.765573		-1.06615
								0.847534		-1.24084
								0.907499		-1.42156
								0.944995		-1.60638
								0.961878		-1.79252
								0.960388		-1.97621
								0.94218		-2.15256
								0.908326		-2.31549
								0.859323		-2.45857
								0.795117		-2.57776
								0.715128		-2.67331
								0.618297		-2.74769
								0.503127		-2.80273
								0.368709		-2.83857
								0.216708		-2.85363
								0.0514444		-2.84554
								-0.121931		-2.81406
								-0.299254		-2.76292
								-0.478206		-2.698
								-0.656281		-2.62443
								-0.829721		-2.54569
								-0.996287		-2.46366
								-1.15611		-2.37959
								-1.30966		-2.29709
								-1.45672		-2.22309
								-1.59626		-2.16406
								-1.72635		-2.12318
								-1.84409		-2.10039
								-1.94553		-2.09144
								-2.02559		-2.08886
								-2.07799		-2.0868
								-2.0962		-2.08384
								-2.07623		-2.08114
								-2.0186		-2.07955
								-1.92638		-2.07862
								-1.80334		-2.07662
								-1.65591		-2.07058
								-1.49423		-2.05622
								-1.3274		-2.028
								-1.15884		-1.9801
								-0.987291		-1.90928
								-0.810805		-1.81684
								-0.630656		-1.70677
								-0.452418		-1.58289
								-0.28128		-1.44801
								-0.118312		-1.30392
								0.0355914		-1.15253
								0.175772		-0.997805
								0.296597		-0.845887
								0.39425		-0.703264
								0.466656		-0.574941
								0.514384		-0.462612
								0.540603		-0.364735
								0.549128		-0.27852
								0.543453		-0.20095
								0.526734		-0.128833
								0.5018		-0.0588553
								0.471158		0.0114209
								0.43701		0.0815904
								0.401269		0.149323
								0.365579		0.214158
								0.33134		0.278421
								0.299725		0.344305
								0.271705		0.410956
								0.248064		0.47539
								0.229419		0.536289
								0.216233		0.594921
								0.208826		0.653187
								0.207384		0.71262
								0.211963		0.774354
								0.22249		0.839084
								0.238759		0.907028
								0.260427		0.977889
								0.287002		1.05081
								0.31783		1.12434
								0.352082		1.19637
								0.388731		1.26412
								0.426533		1.32406
								0.464005		1.37189
								0.499403		1.40347
								0.530699		1.41765
								0.5546		1.41721
								0.564612		1.40505
								0.552947		1.38223
								0.51627		1.34989
								0.455714		1.30837
								0.371139		1.25618
								0.260216		1.19297
								0.122316		1.1205
								-0.0414255		1.04075
								-0.231857		0.955036
								-0.452671		0.86401
								-0.707409		0.767754
								-0.996446		0.665818
								-1.31779		0.557285
								-1.67076		0.441787
								-2.05672		0.322454
								-2.47696		0.206942
								-2.93149		0.102706
								-3.41785		0.0122786
								-3.92888		-0.0657151
								-4.45243		-0.133618
								-4.97204		-0.192779
								-5.46561		-0.241587
								-5.90515		-0.276401
								-6.25834		-0.295351
								-6.4893		-0.299283
								-6.55831		-0.289822
								-6.42174		-0.268415
								-6.03199		-0.236336
								-5.33663		-0.194696
								-4.27676		-0.144462
								-2.78837		-0.086489
								-0.806915		-0.0215413
								1.73087		0.0496658
								4.8876		0.126429
								8.72463		0.208011
								13.3011		0.293599
								18.6743		0.382247
								24.899		0.472832
								32.0221		0.563992
								40.0767		0.654077
								49.0808		0.741091
								59.0381		0.822637
								69.9364		0.895864
								81.743		0.95742
								94.4024		1.00436
								107.836		1.03605
								121.947		1.0541
								136.625		1.06046
								151.748		1.05643
								167.184		1.04268
								182.794		1.01824
								198.427		0.979615
								213.931		0.923645
								229.146		0.85136
								243.918		0.76611
								258.096		0.668808
								271.542		0.557982
								284.124		0.433671
								295.721		0.298455
								306.228		0.155608
								315.555		0.00822479
								323.633		-0.140695
								330.408		-0.288156
								335.839		-0.431076
								339.901		-0.566199
								342.584		-0.690006
								343.899		-0.798633
								343.873		-0.887799
								342.55		-0.953697
								339.986		-0.994858
								336.249		-1.01211
								331.422		-1.00666
								325.599		-0.979051
								318.877		-0.930226
								311.359		-0.863382
								303.149		-0.784035
								294.346		-0.698135
								285.047		-0.611151
								275.348		-0.528125
								265.341		-0.453722
								255.112		-0.392279
								244.739		-0.347853
								234.3		-0.324254
								223.868		-0.32507
								213.508		-0.353687
								203.277		-0.413278
								193.225		-0.506793
								183.392		-0.636916
								173.816		-0.806009
								164.529		-1.01507
								155.563		-1.26172
								146.939		-1.54102
								138.671		-1.84917
								130.763		-2.18428
								123.217		-2.5443
								116.033		-2.9258
								109.207		-3.32381
								102.739		-3.73154
								96.6233		-4.14017
								90.8497		-4.53858
								85.4083		-4.91312
								80.2876		-5.24735
								75.4745		-5.52184
								70.9553		-5.71395
								66.7171		-5.79767
								62.7472		-5.74353
								59.0313		-5.51853
								55.5531		-5.0862
								52.2963		-4.40677
								49.2448		-3.43738
								46.3824		-2.13258
								43.6929		-0.444929
								41.1615		1.67424
								38.7743		4.27372
								36.52		7.40208
								34.3921		11.108
								32.3886		15.4383
								30.5092		20.4356
								28.7531		26.1398
								27.1169		32.5863
								25.5949		39.8003
								24.18		47.7933
								22.8648		56.5666
								21.6422		66.112
								20.5067		76.4075
								19.4536		87.4152
								18.4771		99.0827
								17.5692		111.343
								16.7219		124.116
								15.9299		137.314
								15.1891		150.843
								14.4943		164.603
								13.8384		178.482
								13.2144		192.36
								12.6171		206.116
								12.0436		219.627
								11.4923		232.77
								10.9615		245.424
								10.4502		257.471
								9.95758		268.796
								9.4809		279.296
								9.01628		288.878
								8.56067		297.463
								8.11318		304.987
								7.67437		311.397
								7.2446		316.649
								6.82433		320.71
								6.41531		323.566
								6.01991		325.217
								5.64133		325.679
								5.28485		324.973
								4.95609		323.135
								4.6584		320.214
								4.39207		316.271
								4.15547		311.375
								3.94716		305.601
								3.76505		299.027
								3.60365		291.737
								3.45613		283.82
								3.31823		275.365
								3.18836		266.463
								3.06769		257.205
								2.96023		247.678
								2.86808		237.961
								2.78772		228.135
								2.71382		218.274
								2.64418		208.446
								2.57873		198.712
								2.51772		189.125
								2.46267		179.726
								2.4155		170.552
								2.37468		161.631
								2.33526		152.994
								2.29375		144.664
								2.24999		136.662
								2.20339		128.999
								2.151		121.68
								2.09046		114.704
								2.02096		108.063
								1.94233		101.75
								1.85603		95.7539
								1.76522		90.0646
								1.67287		84.6733
								1.57993		79.5726
								1.48437		74.7538
								1.38322		70.2061
								1.27451		65.919
								1.15734		61.8837
								1.0329		58.0923
								0.904568		54.5342
								0.77603		51.1946
								0.650427		48.0572
								0.530419		45.1083
								0.418266		42.3403
								0.3159		39.7488
								0.224994		37.3278
								0.147022		35.0693
								0.0833166		32.9624
								0.0351162		30.9946
								0.00264387		29.1553
								-0.016781		27.437
								-0.0277628		25.8333
								-0.03298		24.3383
								-0.0322186		22.9482
								-0.0242869		21.6618
								-0.00797582		20.476
								0.0179361		19.3842
								0.0546722		18.3784
								0.103442		17.4525
								0.164457		16.6002
								0.234987		15.8134
								0.310278		15.0814
								0.387347		14.3922
								0.465901		13.7362
								0.546364		13.1085
								0.628877		12.5062
								0.713242		11.9239
								0.798876		11.3547
								0.884757		10.7945
								0.969375		10.2449
								1.05067		9.70866
								1.12696		9.18584
								1.19879		8.67739
								1.26792		8.18722
								1.33348		7.71965
								1.39093		7.27783
								1.43492		6.86302
								1.46212		6.47394
								1.47122		6.1089
								1.46192		5.768
								1.43589		5.45143
								1.39682		5.15773
								1.34845		4.88497
								1.29367		4.63093
								1.23456		4.39231
								1.1724		4.16677
								1.1077		3.95506
								1.04027		3.75919
								0.970187		3.57968
								0.899776		3.41477
								0.832679		3.26143
								0.771029		3.11742
								0.716444		2.98138
								0.671028		2.85193
								0.63548		2.72875
								0.610088		2.61169
								0.595703		2.497
								0.590881		2.37836
								0.591892		2.25367
								0.596557		2.12803
								0.605213		2.00897
								0.618788		1.89984
								0.636875		1.79795
								0.656772		1.69946
								0.675383		1.60421
								0.691127		1.51483
								0.703929		1.43393
								0.716167		1.36318
								0.731706		1.30338
								0.752052		1.25446
								0.776341		1.21559
								0.804207		1.18513
								0.834805		1.1607
								0.864878		1.13921
								0.889699		1.11779
								0.904967		1.09577
								0.90872		1.07465
								0.901317		1.05719
								0.883525		1.0474
								0.855558		1.04769
								0.817093		1.05502
								0.767285		1.06283
								0.70479		1.06678
								0.628755		1.0667
								0.540779		1.06268
								0.444954		1.05326
								0.346		1.03818
								0.248368		1.01947
								0.156294		0.999452
								0.0738615		0.979826
								0.00505339		0.961683
								-0.0471551		0.945512
								-0.0826742		0.931208
								-0.104268		0.91809
								-0.114653		0.904899
								-0.11361		0.889817
								-0.0989331		0.871429
								-0.0702689		0.85161
								-0.0300857		0.836497
								0.0182291		0.831704
								0.071304		0.837531
								0.125755		0.849927
								0.178154		0.86337
								0.224995		0.872771
								0.262667		0.876349
								0.287421		0.877547
								0.296312		0.882144
								0.289099		0.893463
								0.268242		0.911407
								0.237947		0.934368
								0.205133		0.960177
								0.178495		0.986092
								0.163719		1.00974
								0.160629		1.03102
								0.166061		1.05209
								0.179632		1.07543
								0.205647		1.10288
								0.2483		1.13562
								0.306855		1.17415
								0.376585		1.21826
								0.451609		1.26703
								0.525817		1.31878
								0.592819		1.37107
								0.646866		1.4216
								0.685682		1.47009
								0.712357		1.51733
								0.733399		1.56223
								0.754878		1.60279
								0.778581		1.63796
								0.801034		1.66761
								0.818284		1.69351
								0.830685		1.71831
								0.840967		1.74172
								0.849434		1.76044
								0.853954		1.77207
								0.853794		1.77693
								0.850576		1.77811
								0.846356		1.77951
								0.842671		1.78205
								0.840536		1.78264
								0.84045		1.77715
								0.842394		1.76318
								0.846793		1.74015
								0.856429		1.70736
								0.875485		1.66303
								0.905692		1.6053
								0.945368		1.53418
								0.991309		1.45157
								1.03973		1.36035
								1.08624		1.26538
								1.12581		1.17261
								1.15273		1.08627
								1.1616		1.00985
								1.1501		0.947129
								1.12102		0.899348
								1.08023		0.864287
								1.0339		0.838209
								0.987554		0.816843
								0.945091		0.796362
								0.906945		0.776274
								0.871043		0.760392
								0.836676		0.753013
								0.805476		0.757002
								0.779519		0.775721
								0.760386		0.81206
								0.749177		0.866511
								0.746523		0.937142
								0.752592		1.01861
								0.767091		1.10307
								0.789264		1.18398
								0.817879		1.25698
								0.851221		1.31892
								0.887069		1.36876
								0.92268		1.40753
								0.954765		1.43636
								0.980431		1.45555
								0.999076		1.46451
								1.01238		1.46175
								1.02236		1.4449
								1.03042		1.41164
								1.03735		1.36263
								1.04328		1.30244
								1.04773		1.23577
								1.0486		1.1646
								1.04124		1.08922
								1.02132		1.01014
								0.988669		0.930084
								0.946323		0.853079
								0.897679		0.780661
								0.845555		0.711922
								0.792216		0.647392
								0.739412		0.590041
								0.688404		0.543396
								0.639999		0.510622
								0.594582		0.494543
								0.552143		0.496707
								0.512305		0.515475
								0.474354		0.546981
								0.437259		0.588955
								0.399699		0.641667
								0.360083		0.705981
								0.316576		0.781403
								0.267125		0.864126
								0.209481		0.947943
								0.141236		1.02804
								0.059856		1.10188
								-0.037275		1.16728
								-0.152806		1.22138
								-0.289356		1.26058
								-0.449447		1.28058
								-0.635411		1.27722
								-0.848342		1.24945
								-1.08606		1.20115
								-1.34392		1.13931

## Sheet: Fig.2d
incongruent -eye position	intact (deg)			scramble(deg)			incongruent -eye velocity	intact (deg/s)		scramble (deg/s)
	0	0		0	0			-0.431061		-0.139277
	3.82371e-05	-4.71508e-05		-8.85677e-05	-0.000135923			-0.331639		-0.160818
	0.000126956	-9.88399e-05		-0.000169752	-0.00032818			-0.241667		-0.19971
	0.000258116	-0.000152192		-0.000243646	-0.000570367			-0.163276		-0.25384
	0.000425259	-0.000203788		-0.000310462	-0.000857042			-0.0965254		-0.320011
	0.000623429	-0.000249633		-0.00037049	-0.00118358			-0.0394539		-0.394862
	0.000849074	-0.000285128		-0.000424055	-0.00154598			0.0080445		-0.474837
	0.00109992	-0.00030504		-0.000471481	-0.00194069			0.0441845		-0.556134
	0.00137484	-0.000303483		-0.000513056	-0.00236439			0.0681385		-0.634659
	0.00167371	-0.00027391		-0.000549005	-0.00281372			0.0790557		-0.706938
	0.00199719	-0.000209111		-0.000579461	-0.00328503			0.0750881		-0.771985
	0.00234662	-0.000101238		-0.00060445	-0.00377414			0.0562621		-0.83126
	0.00272376	5.81537e-05		-0.000623862	-0.004276			0.0244807		-0.886711
	0.00313059	0.00027708		-0.000637447	-0.00478444			-0.0203018		-0.938817
	0.00356909	0.00056015		-0.000644792	-0.00529181			-0.0800604		-0.984637
	0.00404098	0.000906507		-0.000646282	-0.00578968			-0.154835		-1.01778
	0.00454745	0.00131158		-0.000645965	-0.0062714			-0.241734		-1.03124
	0.00508887	0.00176975		-0.000653473	-0.00673368			-0.336808		-1.02126
	0.00566448	0.00227505		-0.000682096	-0.0071744			-0.435957		-0.989184
	0.00627208	0.00282091		-0.000745904	-0.00759043			-0.534874		-0.939579
	0.00690857	0.00339981		-0.000858756	-0.00797923			-0.629941		-0.877374
	0.00757255	0.00400299		-0.00103427	-0.00834057			-0.720093		-0.806923
	0.00826577	0.00462008		-0.00128572	-0.00867527			-0.806755		-0.732042
	0.00899179	0.00523871		-0.00162598	-0.00898505			-0.891871		-0.656056
	0.00975557	0.00584418		-0.0020673	-0.0092732			-0.975931		-0.581839
	0.010564	0.00641905		-0.00262114	-0.00954256			-1.056		-0.511863
	0.0114233	0.00694374		-0.00329788	-0.00979239			-1.12663		-0.44824
	0.0123361	0.00740003		-0.00410647	-0.0100173			-1.1846		-0.392768
	0.0132995	0.00777553		-0.00505403	-0.010207			-1.2308		-0.346966
	0.0143046	0.00806341		-0.00614531	-0.0103464			-1.26636		-0.312108
	0.0153373	0.00825831		-0.00738219	-0.010416			-1.29069		-0.289254
	0.0163807	0.00835622		-0.00876291	-0.0103964			-1.30434		-0.279268
	0.0174202	0.00835814		-0.0102814	-0.0102731			-1.30997		-0.28283
	0.0184431	0.00827005		-0.0119263	-0.0100411			-1.31038		-0.300448
	0.0194373	0.00809907		-0.0136812	-0.00970461			-1.30758		-0.33245
	0.0203926	0.00785349		-0.0155264	-0.00927433			-1.30276		-0.378976
	0.0213021	0.00754674		-0.0174406	-0.00876492			-1.29633		-0.439957
	0.0221594	0.00719753		-0.0194018	-0.00819325			-1.28885		-0.515087
	0.0229564	0.00682519		-0.0213892	-0.00757582			-1.28296		-0.603786
	0.0236846	0.00644613		-0.0233845	-0.00692627			-1.28242		-0.705154
	0.0243374	0.00607301		-0.0253718	-0.00625478			-1.28829		-0.817914
	0.0249108	0.00571506		-0.0273368	-0.00556845			-1.29798		-0.940357
	0.0254029	0.00537917		-0.0292656	-0.00487171			-1.30712		-1.07026
	0.0258135	0.00507308		-0.0311474	-0.00416679			-1.31056		-1.20484
	0.0261439	0.00480741		-0.0329745	-0.00345502			-1.3033		-1.34063
	0.0263965	0.00459402		-0.0347397	-0.00274024			-1.28339		-1.47345
	0.0265748	0.00444321		-0.0364329	-0.00203106			-1.25286		-1.59826
	0.0266832	0.00436294		-0.0380421	-0.00133945			-1.21297		-1.71013
	0.0267266	0.00435889		-0.0395554	-0.000678229			-1.16038		-1.80598
	0.0267108	0.00443453		-0.0409617	-5.96374e-05			-1.09098		-1.88458
	0.0266421	0.00459113		-0.0422517	0.000506231			-1.00479		-1.94554
	0.0265274	0.00482861		-0.0434173	0.00101103			-0.904983		-1.99016
	0.0263745	0.00514841		-0.0444494	0.00144783			-0.795066		-2.02049
	0.0261916	0.00555519		-0.0453396	0.00181463			-0.67801		-2.03543
	0.025988	0.00605476		-0.0460821	0.00211602			-0.556296		-2.03074
	0.025773	0.00665092		-0.0466742	0.00236006			-0.431988		-2.0038
	0.0255529	0.00734421		-0.047116	0.00255718			-0.306813		-1.95749
	0.0253297	0.00813155		-0.0474098	0.00271996			-0.182229		-1.90014
	0.0251028	0.00900578		-0.04756	0.00285922			-0.0595096		-1.8418
	0.0248721	0.00995524		-0.0475728	0.00298198			0.0601873		-1.78844
	0.0246381	0.0109632		-0.0474563	0.00309424			0.17574		-1.73918
	0.0243993	0.0120072		-0.0472201	0.0032019			0.28599		-1.68913
	0.0241504	0.0130596		-0.046876	0.00330871			0.389675		-1.63523
	0.0238841	0.0140906		-0.0464373	0.00341529			0.485358		-1.57913
	0.0235945	0.0150735		-0.0459198	0.00351908			0.571364		-1.52532
	0.0232772	0.0159876		-0.0453417	0.00361516			0.645725		-1.47828
	0.0229262	0.0168182		-0.0447228	0.00369914			0.706125		-1.44154
	0.0225327	0.0175525		-0.0440824	0.00376899			0.749855		-1.41773
	0.0220871	0.0181777		-0.0434374	0.00382307			0.77378		-1.40859
	0.0215819	0.018682		-0.0428038	0.00385816			0.775268		-1.41499
	0.021013	0.0190575		-0.0421969	0.00387138			0.755055		-1.4369
	0.0203803	0.0193008		-0.041631	0.00386206			0.718206		-1.47347
	0.0196877	0.0194125		-0.0411208	0.0038298			0.669324		-1.52292
	0.0189437	0.0193972		-0.0406802	0.00377165			0.608742		-1.58258
	0.0181607	0.0192637		-0.0403194	0.00368207			0.536381		-1.64883
	0.0173519	0.0190236		-0.0400439	0.00355686			0.455634		-1.71709
	0.0165265	0.0186886		-0.0398558	0.00339796			0.370523		-1.78272
	0.0156908	0.0182681		-0.039753	0.00321357			0.282874		-1.84387
	0.0148519	0.0177681		-0.0397291	0.00301341			0.192368		-1.90334
	0.0140187	0.0171925		-0.0397757	0.00280504			0.0965957		-1.96568
	0.0131975	0.0165464		-0.0398842	0.00259297			-0.00600986		-2.03236
	0.0123896	0.0158391		-0.0400476	0.00237883			-0.112277		-2.10172
	0.0115935	0.0150847		-0.0402605	0.00216148			-0.215194		-2.17276
	0.0108077	0.0142997		-0.0405172	0.00193713			-0.306721		-2.24607
	0.01003	0.0135004		-0.0408096	0.00169951			-0.37965		-2.32189
	0.00925796	0.0127022		-0.041125	0.00143997			-0.430424		-2.39905
	0.00849057	0.0119208		-0.0414468	0.00114861			-0.461017		-2.47495
	0.00772652	0.0111711		-0.0417596	0.000817318			-0.476981		-2.54556
	0.00696195	0.0104649		-0.0420514	0.000441867			-0.484547		-2.60528
	0.00619089	0.00980872		-0.0423116	2.11586e-05			-0.4887		-2.64795
	0.00540861	0.00920402		-0.042529	-0.000442546			-0.491246		-2.66963
	0.004614	0.00865056		-0.0426936	-0.000942405			-0.49178		-2.67052
	0.00380817	0.00814865		-0.0427982	-0.0014696			-0.490549		-2.65304
	0.002992	0.00769762		-0.0428365	-0.00201876			-0.487502		-2.61891
	0.00216573	0.00729319		-0.0428013	-0.00259058			-0.481328		-2.5692
	0.00132944	0.00692685		-0.0426858	-0.00318947			-0.471377		-2.50626
	0.000483537	0.00658704		-0.0424863	-0.0038204			-0.456704		-2.43373
	-0.000370688	0.00626321		-0.0422	-0.00448758			-0.435116		-2.35468
	-0.00123058	0.00595084		-0.041823	-0.00519398			-0.406063		-2.27069
	-0.00209158	0.00565163		-0.0413517	-0.00594104			-0.371605		-2.18286
	-0.00294669	0.00536891		-0.0407832	-0.00672813			-0.334514		-2.09376
	-0.00378598	0.00510397		-0.0401141	-0.00755217			-0.297335		-2.00751
	-0.00459602	0.00485528		-0.0393432	-0.00840709			-0.262408		-1.9279
	-0.0053594	0.00461867		-0.0384748	-0.00928434			-0.231889		-1.85748
	-0.00605423	0.00438841		-0.0375197	-0.0101752			-0.207772		-1.79763
	-0.0066537	0.00416026		-0.0364963	-0.0110722			-0.191908		-1.74856
	-0.00712655	0.00393351		-0.0354298	-0.0119665			-0.185055		-1.70941
	-0.00744064	0.00370924		-0.0343492	-0.0128449			-0.184978		-1.6782
	-0.00756742	0.00348753		-0.0332821	-0.0136887			-0.187404		-1.65193
	-0.00748172	0.00326668		-0.0322515	-0.0144774			-0.188908		-1.62657
	-0.00715694	0.0030443		-0.0312756	-0.0151939			-0.185949		-1.59704
	-0.00656219	0.00282028		-0.0303682	-0.0158277			-0.173911		-1.55827
	-0.00566444	0.00259891		-0.0295397	-0.0163757			-0.149987		-1.50802
	-0.00443082	0.00238706		-0.0287973	-0.0168404			-0.114143		-1.4479
	-0.00282722	0.00219143		-0.0281454	-0.0172261			-0.0672151		-1.37954
	-0.000817192	0.00201776		-0.0275865	-0.017534			-0.0099746		-1.30275
	0.00163421	0.00187088		-0.0271214	-0.0177613			0.0568467		-1.21841
	0.00455437	0.0017549		-0.0267494	-0.0179063			0.13252		-1.12946
	0.00796066	0.00167322		-0.0264687	-0.0179721			0.216278		-1.03908
	0.0118596	0.00162866		-0.0262765	-0.0179673			0.307272		-0.949728
	0.0162437	0.00162346		-0.0261696	-0.017905			0.404515		-0.863249
	0.0210894	0.00165934		-0.026144	-0.017799			0.506832		-0.780891
	0.0263548	0.00173751		-0.0261952	-0.0176592			0.612797		-0.703375
	0.0319762	0.00185861		-0.0263182	-0.0174914			0.720671		-0.63094
	0.0378659	0.00202365		-0.0265075	-0.0173022			0.828341		-0.563391
	0.043912	0.0022368		-0.026757	-0.0171033			0.933249		-0.500145
	0.0499754	0.00250817		-0.0270599	-0.0169112			1.03233		-0.441232
	0.0558824	0.00285464		-0.0274083	-0.0167435			1.12195		-0.38925
	0.0614193	0.00329969		-0.0277937	-0.0166136			1.19784		-0.348441
	0.0663317	0.0038741		-0.0282059	-0.0165275			1.25506		-0.320889
	0.0703213	0.00461766		-0.0286334	-0.0164863			1.28887		-0.30558
	0.0730428	0.00557872		-0.029063	-0.0164876			1.29763		-0.300343
	0.074098	0.00681284		-0.0294793	-0.0165249			1.28371		-0.302815
	0.0730317	0.00838404		-0.0298657	-0.0165876			1.24963		-0.310445
	0.0693303	0.0103669		-0.030208	-0.0166628			1.1962		-0.320496
	0.0624225	0.0128467		-0.0304987	-0.0167372			1.12536		-0.33004
	0.0516808	0.0159177		-0.0307368	-0.0168001			1.04121		-0.336911
	0.0364228	0.0196824		-0.0309234	-0.0168459			0.948112		-0.341618
	0.0159168	0.0242487		-0.0310567	-0.0168744			0.849811		-0.346384
	-0.0106086	0.0297282		-0.0311321	-0.0168866			0.749457		-0.351301
	-0.0439527	0.0362332		-0.0311419	-0.0168795			0.649682		-0.353373
	-0.0849356	0.0438733		-0.0310801	-0.0168423			0.552659		-0.34843
	-0.134387	0.052751		-0.0309476	-0.0167604			0.46016		-0.332087
	-0.193133	0.0629588		-0.0307553	-0.0166201			0.373619		-0.300709
	-0.26198	0.0745765		-0.0305209	-0.0164132			0.294182		-0.253336
	-0.341704	0.0876726		-0.0302641	-0.0161371			0.222767		-0.191709
	-0.43304	0.102304		-0.0300021	-0.0157914			0.160106		-0.118375
	-0.536665	0.118517		-0.0297492	-0.0153769			0.106793		-0.0357665
	-0.653189	0.136343		-0.0295177	-0.0148974			0.0633221		0.0527927
	-0.783138	0.1558		-0.0293211	-0.0143626			0.0301164		0.142082
	-0.926943	0.176887		-0.0291762	-0.0137889			0.00755843		0.226849
	-1.08494	0.199588		-0.029102	-0.0131955			-0.00399139		0.303672
	-1.25734	0.223865		-0.02912	-0.0126001			-0.00418063		0.370912
	-1.44426	0.249665		-0.029256	-0.0120183			0.00734212		0.429622
	-1.64569	0.276912		-0.0295413	-0.0114649			0.0299681		0.48351
	-1.86147	0.305512		-0.0300113	-0.0109531			0.0602035		0.536019
	-2.09133	0.335355		-0.0307029	-0.0104954			0.0926153		0.58742
	-2.33486	0.366312		-0.0316506	-0.010104			0.123651		0.635737
	-2.59153	0.398236		-0.0328869	-0.00979014			0.15258		0.680551
	-2.86066	0.430968		-0.034444	-0.00956065			0.179555		0.723935
	-3.14147	0.46434		-0.0363552	-0.00941761			0.204633		0.768499
	-3.43305	0.498173		-0.0386518	-0.00935839			0.227767		0.816411
	-3.7344	0.532286		-0.0413595	-0.00937568			0.248779		0.869366
	-4.04441	0.566496		-0.0444955	-0.00945765			0.267356		0.928556
	-4.36191	0.600621		-0.048068	-0.00958876			0.283031		0.994637
	-4.68564	0.634482		-0.0520781	-0.00975272			0.295174		1.06769
	-5.01432	0.667913		-0.0565227	-0.00993424			0.302985		1.1472
	-5.34665	0.700761		-0.0613914	-0.010118			0.305479		1.23197
	-5.6813	0.73289		-0.0666594	-0.0102896			0.301491		1.3201
	-6.01697	0.764178		-0.0722819	-0.0104391			0.289669		1.40896
	-6.35239	0.794514		-0.0781931	-0.010561			0.269437		1.49508
	-6.68631	0.823801		-0.084308	-0.0106505			0.242922		1.57415
	-7.01756	0.851961		-0.0905197	-0.0107021			0.214005		1.64187
	-7.34501	0.878937		-0.0966936	-0.0107109			0.184501		1.69684
	-7.66762	0.904691		-0.102663	-0.0106702			0.153216		1.74146
	-7.98442	0.9292		-0.108226	-0.0105701			0.118843		1.77802
	-8.29455	0.952455		-0.113145	-0.0104			0.0828603		1.80681
	-8.59723	0.974459		-0.117145	-0.0101545			0.0485912		1.82893
	-8.89178	0.99523		-0.119908	-0.00983672			0.0173895		1.84727
	-9.17763	1.0148		-0.121072	-0.00945592			-0.0122989		1.86455
	-9.45429	1.0332		-0.120227	-0.00902534			-0.0429984		1.88234
	-9.72138	1.0505		-0.116919	-0.00856125			-0.0762666		1.9011
	-9.97861	1.06674		-0.110647	-0.00808322			-0.110756		1.92009
	-10.2257	1.08198		-0.100859	-0.00761443			-0.143156		1.93745
	-10.4627	1.09626		-0.0869523	-0.00718195			-0.172002		1.9501
	-10.6894	1.10962		-0.0682743	-0.00681604			-0.198626		1.9538
	-10.9059	1.12211		-0.0441245	-0.00654756			-0.225209		1.94406
	-11.1123	1.13378		-0.0137585	-0.00640529			-0.253814		1.91809
	-11.3088	1.14465		0.0236047	-0.00641609			-0.286362		1.87477
	-11.4955	1.15477		0.068772	-0.00660783			-0.324619		1.81373
	-11.6727	1.16417		0.122566	-0.00701136			-0.369214		1.73538
	-11.8407	1.1729		0.185815	-0.00765839			-0.417697		1.63901
	-11.9998	1.18099		0.259342	-0.0085784			-0.465472		1.52191
	-12.1504	1.1885		0.343949	-0.00979821			-0.509606		1.38227
	-12.2927	1.19546		0.440401	-0.0113443			-0.549757		1.22025
	-12.4272	1.20192		0.549405	-0.013245			-0.586232		1.0361
	-12.5542	1.2079		0.671598	-0.0155303			-0.619002		0.829344
	-12.6742	1.21345		0.807532	-0.0182298			-0.647677		0.598885
	-12.7875	1.2186		0.95766	-0.0213696			-0.671491		0.34311
	-12.8946	1.22338		1.12233	-0.0249704			-0.68928		0.0590931
	-12.9957	1.22781		1.30177	-0.0290473			-0.69947		-0.259172
	-13.0912	1.23191		1.49608	-0.0336091			-0.700068		-0.619635
	-13.1816	1.2357		1.70522	-0.0386562			-0.688652		-1.02816
	-13.2671	1.23919		1.92899	-0.044183			-0.662375		-1.48732
	-13.348	1.24241		2.16704	-0.050183			-0.617973		-1.99812
	-13.4247	1.24537		2.41889	-0.0566527			-0.552739		-2.56059
	-13.4975	1.2481		2.68388	-0.0635903			-0.46647		-3.17355
	-13.5666	1.25061		2.96124	-0.0709948			-0.361508		-3.83423
	-13.6324	1.25293		3.25005	-0.0788646			-0.241832		-4.53788
	-13.6951	1.25509		3.54929	-0.0871949			-0.113123		-5.2774
	-13.7549	1.25709		3.85784	-0.0959759			0.019084		-6.04385
	-13.8121	1.25896		4.1745	-0.105191			0.150283		-6.82887
	-13.8669	1.26072		4.49798	-0.114817			0.274036		-7.62614
	-13.9195	1.26237		4.82698	-0.124824			0.38094		-8.42995
	-13.9701	1.26394		5.16015	-0.135179			0.461427		-9.23469
	-14.0189	1.26545		5.49612	-0.145852			0.509542		-10.0353
	-14.066	1.26691		5.83355	-0.156815			0.524809		-10.8251
	-14.1115	1.26834		6.17109	-0.168043			0.510286		-11.5927
	-14.1556	1.26974		6.50745	-0.179511			0.469678		-12.3255
	-14.1983	1.27109		6.84137	-0.191187			0.406386		-13.0128
	-14.2396	1.27239		7.17169	-0.203038			0.323526		-13.6472
	-14.2795	1.27363		7.4973	-0.215029			0.223973		-14.2219
	-14.3179	1.27478		7.81719	-0.227121			0.110409		-14.7296
	-14.3547	1.27583		8.13045	-0.239277			-0.0146185		-15.1625
	-14.3898	1.27676		8.43627	-0.251459			-0.148626		-15.5157
	-14.4229	1.27756		8.73393	-0.263637			-0.289117		-15.7882
	-14.4537	1.27819		9.02282	-0.275776			-0.433503		-15.9812
	-14.4819	1.27863		9.30241	-0.287842			-0.579018		-16.0955
	-14.5071	1.27883		9.57229	-0.299804			-0.722627		-16.1341
	-14.5288	1.27877		9.83212	-0.31163			-0.860942		-16.1032
	-14.5464	1.27841		10.0817	-0.323292			-0.990132		-16.0106
	-14.5594	1.27771		10.3207	-0.33476			-1.10584		-15.8632
	-14.5669	1.27662		10.5493	-0.346007			-1.20311		-15.6656
	-14.5682	1.27511		10.7673	-0.357012			-1.2763		-15.421
	-14.5624	1.27313		10.9748	-0.367755			-1.32002		-15.1341
	-14.5486	1.27065		11.172	-0.378222			-1.33191		-14.8103
	-14.5258	1.26761		11.359	-0.388395			-1.31459		-14.4545
	-14.4929	1.26399		11.5361	-0.398259			-1.2737		-14.0702
	-14.4488	1.25976		11.7035	-0.407796			-1.21504		-13.6596
	-14.3923	1.25487		11.8615	-0.416991			-1.14362		-13.224
	-14.3223	1.24931		12.0105	-0.425835			-1.06374		-12.7651
	-14.2377	1.24304		12.1508	-0.434324			-0.978957		-12.2869
	-14.1374	1.23603		12.2827	-0.442462			-0.892216		-11.796
	-14.0202	1.22826		12.4067	-0.450257			-0.805842		-11.3004
	-13.885	1.2197		12.5231	-0.457723			-0.721616		-10.8073
	-13.731	1.21033		12.6323	-0.464876			-0.640823		-10.3218
	-13.5573	1.20015		12.7347	-0.471733			-0.564306		-9.84739
	-13.3629	1.18913		12.8306	-0.478314			-0.492512		-9.3867
	-13.1472	1.17728		12.9205	-0.48464			-0.42554		-8.94125
	-12.9096	1.1646		13.0048	-0.490733			-0.363185		-8.51153
	-12.6497	1.15107		13.0837	-0.496611			-0.30498		-8.0993
	-12.3671	1.1367		13.1576	-0.502281			-0.250235		-7.70775
	-12.0616	1.12147		13.2268	-0.507746			-0.198069		-7.33898
	-11.7332	1.10537		13.2917	-0.513005			-0.147449		-6.99223
	-11.3819	1.08839		13.3526	-0.518055			-0.0972179		-6.66609
	-11.008	1.07052		13.4097	-0.522898			-0.0470892		-6.36155
	-10.612	1.05174		13.4632	-0.527542			0.000407523		-6.08223
	-10.1943	1.03205		13.5135	-0.531994			0.0408537		-5.83165
	-9.75569	1.01144		13.5608	-0.536266			0.0717509		-5.61058
	-9.29689	0.989903		13.6053	-0.540362			0.0934559		-5.41617
	-8.81887	0.967426		13.6472	-0.544288			0.107243		-5.2431
	-8.32271	0.944001		13.6867	-0.548054			0.114333		-5.08654
	-7.80957	0.919617		13.7239	-0.551672			0.11588		-4.9442
	-7.28075	0.894265		13.759	-0.555154			0.112973		-4.8145
	-6.73762	0.867933		13.7922	-0.558517			0.106629		-4.69473
	-6.18164	0.840615		13.8235	-0.561773			0.0977969		-4.58306
	-5.61436	0.812309		13.853	-0.56493			0.0873621		-4.48055
	-5.03736	0.783019		13.881	-0.567992			0.0761495		-4.38925
	-4.45229	0.752758		13.9075	-0.57096			0.0649308		-4.30944
	-3.86082	0.721544		13.9326	-0.573833			0.054431		-4.23965
	-3.26464	0.689401		13.9564	-0.576611			0.0453352		-4.17863
	-2.66546	0.656354		13.979	-0.579289			0.0382943		-4.12447
	-2.06495	0.622436		14.0003	-0.581858			0.0339309		-4.07172
	-1.4648	0.587695		14.0206	-0.584308			0.0328435		-4.01333
	-0.866646	0.552184		14.0398	-0.586627			0.0356085		-3.9446
	-0.272107	0.515971		14.058	-0.588801			0.042781		-3.86217
	0.317274	0.479125		14.0753	-0.590822			0.0548929		-3.76218
	0.900015	0.441723		14.0916	-0.59269			0.0724483		-3.64226
	1.47471	0.403848		14.107	-0.594412			0.0959162		-3.50348
	2.04003	0.365591		14.1215	-0.595998			0.125719		-3.34852
	2.59474	0.327045		14.1352	-0.597466			0.162218		-3.17888
	3.1377	0.288311		14.148	-0.598835			0.205696		-2.99399
	3.66788	0.249497		14.1601	-0.600129			0.256334		-2.7923
	4.18434	0.21072		14.1715	-0.601372			0.314184		-2.57429
	4.68628	0.172097		14.1822	-0.60259			0.379139		-2.34444
	5.17301	0.133743		14.1923	-0.60381			0.450896		-2.10952
	5.64394	0.0957737		14.2018	-0.605056			0.528918		-1.87582
	6.09863	0.0582962		14.2108	-0.606349			0.61239		-1.64833
	6.53674	0.0214118		14.2193	-0.6077			0.700169		-1.43088
	6.95803	-0.0147882		14.2274	-0.609116			0.790736		-1.2263
	7.36238	-0.0502253		14.2352	-0.610598			0.882142		-1.03652
	7.74976	-0.0848376		14.2425	-0.612147			0.971949		-0.862726
	8.12024	-0.118582		14.2496	-0.613766			1.05718		-0.705458
	8.47399	-0.151435		14.2563	-0.615456			1.13427		-0.564723
	8.81123	-0.183391		14.2628	-0.617213			1.19995		-0.440088
	9.13226	-0.214452		14.2691	-0.619034			1.25315		-0.33077
	9.43744	-0.244622		14.2752	-0.620908			1.29399		-0.23571
	9.72718	-0.273901		14.281	-0.622823			1.31988		-0.153644
	10.0019	-0.302289		14.2867	-0.624762			1.32459		-0.0831553
	10.2622	-0.329782		14.2921	-0.626712			1.30108		-0.0227331
	10.5085	-0.356378		14.2974	-0.62866			1.24533		0.0291896
	10.7413	-0.382071		14.3025	-0.630595			1.1583		0.0741957
	10.9613	-0.406855		14.3074	-0.632504			1.04306		0.113852
	11.1689	-0.430732		14.3121	-0.63437			0.900075		0.149683
	11.3648	-0.453711		14.3167	-0.636175			0.727249		0.183143
	11.5494	-0.475809		14.321	-0.637903			0.523862		0.215594
	11.7233	-0.497046		14.3251	-0.639539			0.291637		0.248289
	11.8871	-0.517441		14.329	-0.641073			0.0329406		0.282346
	12.0413	-0.537014		14.3327	-0.642497			-0.250029		0.318732
	12.1863	-0.55579		14.3362	-0.643805			-0.555089		0.358239
	12.3227	-0.573796		14.3395	-0.644999			-0.879893		0.401461
	12.4509	-0.59106		14.3426	-0.646081			-1.22271		0.448774
	12.5713	-0.607606		14.3456	-0.647061			-1.5851		0.500305
	12.6844	-0.623452		14.3483	-0.647952			-1.97265		0.555903
	12.7906	-0.638613		14.3509	-0.648769			-2.39		0.61511
	12.8903	-0.653103		14.3533	-0.649531			-2.83572		0.677125
	12.9839	-0.666939		14.3555	-0.650256			-3.30409		0.74077
	13.0717	-0.680138		14.3576	-0.650966			-3.79046		0.804449
	13.154	-0.69272		14.3595	-0.651684			-4.29395		0.866112
	13.2313	-0.704704		14.3612	-0.652426			-4.81515		0.923216
	13.3038	-0.716109		14.3628	-0.653207			-5.35299		0.973648
	13.3718	-0.726955		14.3642	-0.654033			-5.90342		1.0176
	13.4356	-0.737264		14.3655	-0.654913			-6.45913		1.05661
	13.4954	-0.747059		14.3667	-0.655851			-7.0101		1.08964
	13.5516	-0.756361		14.3677	-0.65685			-7.54623		1.1131
	13.6043	-0.765187		14.3686	-0.657913			-8.05884		1.12468
	13.6538	-0.773553		14.3695	-0.659036			-8.53943		1.12327
	13.7003	-0.781472		14.3703	-0.660214			-8.97939		1.10613
	13.744	-0.788958		14.371	-0.661439			-9.37153		1.06985
	13.785	-0.796027		14.3717	-0.6627			-9.71091		1.01223
	13.8236	-0.802695		14.3723	-0.663986			-9.99447		0.932368
	13.8599	-0.80898		14.373	-0.665284			-10.2209		0.831617
	13.8939	-0.8149		14.3737	-0.666575			-10.3895		0.713638
	13.926	-0.820469		14.3743	-0.667837			-10.4981		0.582549
	13.9562	-0.825705		14.375	-0.66905			-10.5438		0.44203
	13.9846	-0.830632		14.3756	-0.670198			-10.5272		0.295411
	14.0114	-0.835276		14.3763	-0.67127			-10.4526		0.145751
	14.0366	-0.839667		14.3771	-0.672258			-10.3268		-0.0040738
	14.0604	-0.843827		14.3778	-0.673158			-10.1567		-0.151273
	14.0828	-0.847774		14.3786	-0.673972			-9.94688		-0.293058
	14.1039	-0.851526		14.3794	-0.6747			-9.69744		-0.426545
	14.1239	-0.855099		14.3803	-0.675346			-9.40732		-0.548677
	14.1427	-0.85851		14.3812	-0.675914			-9.07906		-0.657094
	14.1604	-0.861771		14.3822	-0.676412			-8.71903		-0.751984
	14.1772	-0.864893		14.3832	-0.676844			-8.3338		-0.835052
	14.1932	-0.867887		14.3843	-0.677219			-7.92938		-0.905627
	14.2082	-0.870762		14.3855	-0.677544			-7.51245		-0.960611
	14.2225	-0.873528		14.3867	-0.677824			-7.08958		-0.999235
	14.236	-0.876194		14.388	-0.678068			-6.66756		-1.02494
	14.2488	-0.878773		14.3894	-0.678279			-6.25457		-1.04054
	14.2609	-0.881274		14.3909	-0.678465			-5.85853		-1.04443
	14.2724	-0.883711		14.3924	-0.678628			-5.48449		-1.03432
	14.2834	-0.886095		14.394	-0.678773			-5.13387		-1.01116
	14.2937	-0.88844		14.3956	-0.678902			-4.80473		-0.976189
	14.3036	-0.890756		14.3972	-0.679017			-4.49295		-0.929107
	14.313	-0.893056		14.3988	-0.679116			-4.19526		-0.870918
	14.322	-0.895356		14.4005	-0.6792			-3.9114		-0.804937
	14.3305	-0.897671		14.4021	-0.679265			-3.64237		-0.73491
	14.3387	-0.900014		14.4037	-0.679308			-3.3877		-0.664088
	14.3464	-0.902394		14.4052	-0.679329			-3.14567		-0.59527
	14.3538	-0.90482		14.4067	-0.679332			-2.9163		-0.53085
	14.3608	-0.907298		14.4082	-0.679322			-2.70247		-0.472853
	14.3675	-0.90983		14.4095	-0.679306			-2.50621		-0.422976
	14.3739	-0.912421		14.4107	-0.679286			-2.32695		-0.382625
	14.38	-0.915071		14.4118	-0.679266			-2.16449		-0.352942
	14.3857	-0.917778		14.4128	-0.679247			-2.02007		-0.334831
	14.3912	-0.920538		14.4136	-0.67923			-1.89454		-0.328977
	14.3963	-0.923343		14.4142	-0.679217			-1.78753		-0.335853
	14.4012	-0.926189		14.4147	-0.679216			-1.69749		-0.35573
	14.4058	-0.92907		14.4151	-0.679237			-1.62176		-0.388665
	14.4101	-0.931982		14.4153	-0.679288			-1.55665		-0.434496
	14.4141	-0.934913		14.4154	-0.679379			-1.49746		-0.491857
	14.4179	-0.937854		14.4153	-0.679515			-1.43949		-0.556235
	14.4215	-0.940788		14.4151	-0.679702			-1.38096		-0.620895
	14.4249	-0.943702		14.4148	-0.679942			-1.32496		-0.68068
	14.4281	-0.946583		14.4143	-0.680238			-1.27758		-0.732929
	14.4312	-0.949417		14.4137	-0.680588			-1.24504		-0.775524
	14.4342	-0.952187		14.4131	-0.680991			-1.23277		-0.80686
	14.437	-0.954879		14.4123	-0.681443			-1.24448		-0.827739
	14.4398	-0.957482		14.4115	-0.681936			-1.27927		-0.840385
	14.4425	-0.95999		14.4106	-0.682466			-1.33068		-0.845559
	14.4452	-0.962394		14.4097	-0.683031			-1.39146		-0.84447
	14.4478	-0.96469		14.4088	-0.683634			-1.45832		-0.841642
	14.4504	-0.966881		14.408	-0.684281			-1.53098		-0.842043
	14.4528	-0.968975		14.4071	-0.684978			-1.6092		-0.848206
	14.4553	-0.970985		14.4063	-0.685725			-1.69181		-0.860224
	14.4577	-0.972928		14.4055	-0.68652			-1.77663		-0.875752
	14.4601	-0.974822		14.4048	-0.687355			-1.86047		-0.891914
	14.4624	-0.976686		14.4042	-0.688221			-1.93904		-0.907218
	14.4647	-0.978538		14.4036	-0.689108			-2.00785		-0.921538
	14.4669	-0.980395		14.4031	-0.690002			-2.06412		-0.936113
	14.4691	-0.982273		14.4028	-0.69089			-2.10672		-0.951615
	14.4713	-0.984182		14.4025	-0.691759			-2.13516		-0.967184
	14.4734	-0.986128		14.4023	-0.692604			-2.15055		-0.982331
	14.4754	-0.988116		14.4022	-0.69342			-2.15557		-0.995978
	14.4774	-0.990149		14.4021	-0.694202			-2.15254		-1.00548
	14.4794	-0.992225		14.4022	-0.694946			-2.14247		-1.00951
	14.4813	-0.994341		14.4024	-0.695648			-2.12502		-1.00899
	14.4832	-0.99649		14.4026	-0.696303			-2.09857		-1.00519
	14.4851	-0.998669		14.4029	-0.696905			-2.06018		-0.998757
	14.4869	-1.00088		14.4033	-0.697451			-2.00564		-0.990691
	14.4886	-1.00311		14.4037	-0.697942			-1.93042		-0.984248
	14.4903	-1.00537		14.4042	-0.698379			-1.83262		-0.983996
	14.492	-1.00765		14.4047	-0.698769			-1.71491		-0.991977
	14.4936	-1.00996		14.4053	-0.699119			-1.58268		-1.00675
	14.4951	-1.0123		14.4059	-0.699439			-1.44122		-1.02531
	14.4965	-1.01467		14.4065	-0.699739			-1.29485		-1.04402
	14.4979	-1.01707		14.4072	-0.700032			-1.14704		-1.05863
	14.4991	-1.0195		14.4079	-0.700332			-1.00043		-1.0652
	14.5003	-1.02197		14.4087	-0.700655			-0.856957		-1.06201
	14.5015	-1.02445		14.4095	-0.701016			-0.717966		-1.04958
	14.5025	-1.02695		14.4102	-0.701427			-0.584258		-1.02874
	14.5035	-1.02943		14.411	-0.701894			-0.456195		-0.999681
	14.5044	-1.0319		14.4117	-0.702421			-0.333778		-0.961953
	14.5053	-1.03435		14.4124	-0.703011			-0.216729		-0.914503
	14.5062	-1.03676		14.4132	-0.703665			-0.104561		-0.856647
	14.5071	-1.03913		14.4139	-0.704386			0.00334756		-0.790022
	14.508	-1.04145		14.4146	-0.705172			0.107682		-0.718619
	14.5089	-1.04373		14.4152	-0.706024			0.209128		-0.646904
	14.5099	-1.04595		14.4158	-0.706937			0.308306		-0.578901
	14.5109	-1.04811		14.4164	-0.707906			0.405709		-0.518238
	14.5119	-1.05022		14.4169	-0.708922			0.501639		-0.468183
	14.5129	-1.05227		14.4174	-0.709974			0.596153		-0.430725
	14.5139	-1.05424		14.4179	-0.711049			0.688997		-0.404685
	14.5149	-1.05614		14.4184	-0.712135			0.779555		-0.386696
	14.5159	-1.05794		14.4188	-0.713221			0.866787		-0.37506
	14.5169	-1.05966		14.4193	-0.714288			0.949174		-0.370717
	14.5178	-1.06126		14.4197	-0.715317			1.02467		-0.375332
	14.5187	-1.06277		14.4202	-0.716291			1.09065		-0.389383
	14.5195	-1.06417		14.4208	-0.717199			1.14385		-0.410234
	14.5203	-1.06546		14.4215	-0.718032			1.18035		-0.433094
	14.521	-1.06663		14.4222	-0.718782			1.1965		-0.454835
	14.5216	-1.06768		14.423	-0.719442			1.1908		-0.47494
	14.5221	-1.06862		14.424	-0.720009			1.1639		-0.493575
	14.5226	-1.06945		14.425	-0.720486			1.11765		-0.510614
	14.523	-1.07019		14.4261	-0.720876			1.05509		-0.525628
	14.5234	-1.07085		14.4274	-0.721186			0.978596		-0.537874
	14.5237	-1.07144		14.4287	-0.72142			0.888948		-0.546291
	14.5241	-1.07195		14.4302	-0.721579			0.787273		-0.550443
	14.5244	-1.0724		14.4318	-0.721669			0.674163		-0.552442
	14.5248	-1.0728		14.4335	-0.7217			0.54877		-0.555979
	14.5251	-1.07314		14.4352	-0.721682			0.411754		-0.563445
	14.5254	-1.07345		14.4371	-0.721626			0.266321		-0.576891
	14.5257	-1.07373		14.439	-0.721539			0.116383		-0.599936
	14.526	-1.07399		14.441	-0.721429			-0.0343084		-0.636804
	14.5263	-1.07422		14.4429	-0.721305			-0.182073		-0.690384
	14.5266	-1.07442		14.4449	-0.72118			-0.323212		-0.760295
	14.5268	-1.0746		14.4469	-0.721064			-0.454872		-0.842848
	14.5271	-1.07474		14.4489	-0.720962			-0.576887		-0.932924
	14.5274	-1.07484		14.4508	-0.720872			-0.690727		-1.02489
								-0.795597		-1.11348
								-0.887402		-1.19571
								-0.96156		-1.27076
								-1.01583		-1.33901
								-1.05027		-1.40199
								-1.06622		-1.46039
								-1.06632		-1.51213
								-1.05255		-1.55328
								-1.02528		-1.57996
								-0.9852		-1.59017
								-0.932377		-1.58388
								-0.865314		-1.56197
								-0.784825		-1.52723
								-0.696949		-1.48441
								-0.610127		-1.43823
								-0.530451		-1.39158
								-0.460759		-1.34358
								-0.402602		-1.28961
								-0.357245		-1.22329
								-0.325702		-1.13837
								-0.308761		-1.03174
								-0.307009		-0.905323
								-0.320837		-0.764256
								-0.350443		-0.614088
								-0.395823		-0.458938
								-0.456754		-0.299678
								-0.532764		-0.134976
								-0.623097		0.0347609
								-0.725706		0.206331
								-0.835281		0.375551
								-0.944145		0.538113
								-1.04603		0.689478
								-1.13696		0.824782
								-1.21329		0.938743
								-1.27164		1.02654
								-1.31075		1.08661
								-1.33052		1.12158
								-1.3291		1.13437
								-1.30477		1.12625
								-1.25981		1.09973
								-1.19954		1.05951
								-1.12849		1.01057
								-1.04761		0.957253
								-0.955236		0.903279
								-0.850967		0.851779
								-0.73671		0.805329
								-0.614807		0.765983
								-0.487153		0.735295
								-0.355263		0.714349
								-0.220359		0.703775
								-0.083443		0.703758
								0.0546171		0.714052
								0.193004		0.733972
								0.330867		0.762394
								0.467236		0.797741
								0.60094		0.837965
								0.730522		0.880527
								0.854155		0.922373
								0.969569		0.960867
								1.07397		0.995688
								1.16397		1.02784
								1.23553		1.0558
								1.28486		1.07455
								1.31126		1.0784
								1.31898		1.06487
								1.31439		1.03655
								1.30014		0.99925
								1.2733		0.959077
								1.23012		0.920581
								1.17091		0.884841
								1.09904		0.850453
								1.01812		0.816429
								0.93111		0.781258
								0.840321		0.741969
								0.74751		0.697031
								0.653918		0.647337
								0.560321		0.594313
								0.4671		0.538988
								0.374288		0.482027
								0.281633		0.423766
								0.188651		0.364242
								0.0956475		0.303236
								0.00568665		0.240304
								-0.0763074		0.175776
								-0.147335		0.112713
								-0.20723		0.0559847
								-0.256699		0.00847148
								-0.296324		-0.02986
								-0.326532		-0.0600107
								-0.347572		-0.0829654
								-0.359496		-0.0996745
								-0.362143		-0.111039
								-0.355136		-0.117902
								-0.337879		-0.121037
								-0.30956		-0.121148
								-0.269163		-0.118866
								-0.216446		-0.114748
								-0.153882		-0.109277
								-0.0866912		-0.102869
								-0.0209602		-0.0958713
								0.0382371		-0.0885677
								0.088719		-0.0811846
								0.13116		-0.0738934
								0.167143		-0.0668158
								0.19817		-0.0600281
								0.225644		-0.0535655
								0.250847		-0.047426
								0.274923		-0.041575
								0.298862		-0.0359484
								0.323485		-0.0304568
								0.349431		-0.0249883
								0.377138		-0.0194128
								0.406831		-0.0135843
								0.4385		-0.00734557
								0.471889		-0.0014898
								0.506469		0.000316954
								0.54142		-0.00750734
								0.575616		-0.0286238
								0.607593		-0.0638075
								0.636497		-0.112853
								0.663979		-0.17551
								0.693217		-0.251456
								0.726022		-0.340258
								0.763778		-0.441322
								0.808383		-0.553842
								0.859343		-0.676739
								0.912791		-0.80859
								0.963371		-0.947553
								1.00517		-1.09129
								1.03264		-1.23688
								1.04346		-1.38072
								1.03948		-1.51847
								1.02287		-1.64493
								0.994203		-1.75492
								0.95535		-1.84517
								0.909492		-1.91417
								0.857307		-1.96123
								0.797		-1.98737
								0.72817		-1.99528
								0.652805		-1.98739
								0.57341		-1.96493
								0.492087		-1.92885
								0.41059		-1.88179
								0.330369		-1.82713
								0.252622		-1.76516
								0.178344		-1.69316
								0.108374		-1.60923
								0.0434382		-1.51332
								-0.0158027		-1.40629
								-0.0687179		-1.29003
								-0.114668		-1.16555
								-0.152975		-1.03211
								-0.182891		-0.89018
								-0.203578		-0.742473
								-0.215047		-0.59212
								-0.220065		-0.441795
								-0.223186		-0.293811
								-0.226912		-0.150205
								-0.23073		-0.0128362
								-0.23399		0.116532
								-0.238774		0.236147
								-0.248942		0.344187
								-0.266283		0.438688
								-0.289559		0.517481
								-0.317363		0.57813
								-0.350987		0.618849
								-0.393445		0.640377
								-0.445615		0.645001
								-0.505253		0.633658
								-0.568878		0.606894
								-0.632702		0.565833
								-0.692584		0.510269
								-0.743996		0.440613
								-0.78295		0.360803
								-0.808838		0.275469
								-0.825372		0.188063
								-0.83577		0.102827
								-0.83891		0.0238867
								-0.833158		-0.0466157
								-0.821165		-0.108473
								-0.807947		-0.163369
								-0.796101		-0.212926
								-0.785808		-0.256747
								-0.777718		-0.292389
								-0.772		-0.315334
								-0.767386		-0.321851
								-0.764049		-0.312812
								-0.76457		-0.291776
								-0.771061		-0.260196
								-0.782283		-0.217428
								-0.794605		-0.164592
								-0.805835		-0.104596
								-0.816169		-0.0383303
								-0.826268		0.035295
								-0.836294		0.115473
								-0.8459		0.199455
								-0.854225		0.286339
								-0.859892		0.377016
								-0.860998		0.471243
								-0.855115		0.568543
								-0.839287		0.66911
								-0.810039		0.770867
								-0.763381		0.868451
								-0.694836		0.955066
								-0.59946		1.02339
								-0.472854		1.06647
								-0.314094		1.08059
								-0.126774		1.06711
								0.0856992		1.0306
								0.324782		0.975934
								0.594748		0.907352
								0.897745		0.828505
								1.23362		0.742488
								1.6036		0.65189
								2.01003		0.558847
								2.4514		0.465094
								2.92016		0.372024
								3.40629		0.280745
								3.89892		0.192133
								4.38414		0.106895
								4.84565		0.0256159
								5.26541		-0.0511844
								5.62147		-0.123004
								5.88962		-0.18931
								6.04609		-0.249498
								6.06349		-0.302847
								5.90694		-0.348486
								5.53695		-0.38536
								4.91235		-0.412203
								3.98966		-0.427516
								2.72147		-0.42955
								1.05517		-0.416297
								-1.06627		-0.386451
								-3.70136		-0.34229
								-6.9078		-0.290655
								-10.7418		-0.238181
								-15.2579		-0.186527
								-20.5061		-0.13337
								-26.5254		-0.0753154
								-33.3441		-0.00984471
								-40.9828		0.0617665
								-49.4516		0.132493
								-58.746		0.192393
								-68.8469		0.234327
								-79.7241		0.256794
								-91.3356		0.261995
								-103.626		0.252934
								-116.524		0.231503
								-129.948		0.196564
								-143.805		0.144921
								-157.994		0.074224
								-172.405		-0.0179607
								-186.923		-0.136024
								-201.423		-0.285298
								-215.779		-0.470062
								-229.861		-0.69153
								-243.534		-0.947742
								-256.667		-1.2363
								-269.132		-1.5571
								-280.809		-1.91117
								-291.583		-2.29667
								-301.349		-2.70769
								-310.013		-3.13596
								-317.494		-3.57248
								-323.731		-4.01016
								-328.683		-4.44454
								-332.325		-4.86867
								-334.652		-5.26809
								-335.673		-5.62248
								-335.417		-5.91118
								-333.925		-6.11489
								-331.248		-6.21168
								-327.451		-6.17396
								-322.608		-5.96943
								-316.803		-5.563
								-310.127		-4.91885
								-302.677		-3.99975
								-294.551		-2.76361
								-285.848		-1.16406
								-276.665		0.844939
								-267.093		3.30808
								-257.223		6.27229
								-247.143		9.78806
								-236.943		13.9067
								-226.705		18.678
								-216.502		24.1498
								-206.399		30.3661
								-196.453		37.3631
								-186.714		45.1673
								-177.222		53.7941
								-168.011		63.2491
								-159.11		73.527
								-150.544		84.6072
								-142.334		96.4515
								-134.5		109.004
								-127.051		122.193
								-119.991		135.933
								-113.318		150.128
								-107.026		164.67
								-101.108		179.441
								-95.5521		194.31
								-90.3448		209.136
								-85.4754		223.77
								-80.934		238.058
								-76.7088		251.848
								-72.7854		264.993
								-69.1482		277.356
								-65.7828		288.811
								-62.6773		299.242
								-59.8208		308.55
								-57.2002		316.653
								-54.8009		323.485
								-52.6089		329
								-50.6081		333.168
								-48.7785		335.975
								-47.0983		337.425
								-45.542		337.54
								-44.0796		336.356
								-42.6758		333.925
								-41.2915		330.316
								-39.8841		325.609
								-38.4091		319.894
								-36.8193		313.265
								-35.0631		305.82
								-33.0838		297.659
								-30.8215		288.884
								-28.2141		279.592
								-25.1961		269.878
								-21.6963		259.831
								-17.638		249.535
								-12.9416		239.076
								-7.52762		228.537
								-1.31734		217.999
								5.76553		207.531
								13.793		197.19
								22.8296		187.026
								32.9289		177.083
								44.1331		167.403
								56.4716		158.023
								69.9589		148.971
								84.5934		140.269
								100.357		131.932
								117.216		123.971
								135.119		116.395
								154		109.203
								173.782		102.396
								194.374		95.9689
								215.675		89.917
								237.568		84.2328
								259.927		78.9041
								282.617		73.9151
								305.501		69.2502
								328.434		64.8965
								351.266		60.8413
								373.848		57.0707
								396.033		53.5686
								417.678		50.3186
								438.646		47.3036
								458.802		44.5045
								478.016		41.9009
								496.165		39.4748
								513.137		37.2121
								528.825		35.1013
								543.132		33.1319
								555.975		31.2949
								567.283		29.583
								576.997		27.9878
								585.07		26.4973
								591.47		25.0983
								596.177		23.7817
								599.188		22.5419
								600.508		21.3743
								600.152		20.2717
								598.149		19.2235
								594.539		18.2181
								589.381		17.2466
								582.741		16.304
								574.694		15.3902
								565.32		14.5096
								554.71		13.6674
								542.96		12.8658
								530.175		12.1045
								516.464		11.3845
								501.942		10.7103
								486.726		10.0868
								470.936		9.51627
								454.691		8.99671
								438.106		8.52403
								421.289		8.09535
								404.347		7.70926
								387.38		7.36317
								370.484		7.05172
								353.745		6.76881
								337.238		6.50977
								321.031		6.27059
								305.182		6.048
								289.744		5.84069
								274.759		5.64742
								260.262		5.46436
								246.283		5.28513
								232.842		5.10386
								219.955		4.91718
								207.627		4.72338
								195.855		4.52255
								184.631		4.31761
								173.947		4.11257
								163.792		3.90972
								154.153		3.70884
								145.017		3.50826
								136.367		3.3079
								128.18		3.11124
								120.436		2.92262
								113.117		2.74256
								106.207		2.56786
								99.6933		2.39556
								93.5593		2.22493
								87.788		2.05764
								82.3619		1.89589
								77.2653		1.73967
								72.4829		1.5878
								67.9983		1.43994
								63.7962		1.29671
								59.8614		1.1607
								56.1786		1.0366
								52.7334		0.929336
								49.5112		0.842222
								46.4968		0.775131
								43.6749		0.725492
								41.0326		0.691211
								38.5597		0.669744
								36.2477		0.657159
								34.0884		0.651031
								32.0731		0.651404
								30.1917		0.65888
								28.4313		0.67366
								26.7799		0.695537
								25.2288		0.723891
								23.7723		0.75767
								22.4053		0.795377
								21.1236		0.835049
								19.9243		0.875194
								18.8063		0.916683
								17.7672		0.962728
								16.8023		1.01693
								15.9031		1.08136
								15.0596		1.15455
								14.2638		1.23246
								13.5113		1.31228
								12.801		1.39234
								12.1327		1.46825
								11.5082		1.53283
								10.9282		1.58093
								10.3897		1.61216
								9.88627		1.62903
								9.41222		1.63404
								8.96326		1.62866
								8.53703		1.61339
								8.13238		1.5877
								7.7477		1.5501
								7.38118		1.49813
								7.03201		1.42836
								6.69867		1.33743
								6.37725		1.22492
								6.06354		1.09538
								5.75519		0.955476
								5.45092		0.809278
								5.15068		0.658365
								4.85688		0.505736
								4.57255		0.355904
								4.29969		0.211153
								4.04132		0.0706689
								3.80259		-0.0674515
								3.58715		-0.204197
								3.39534		-0.337638
								3.22721		-0.462842
								3.08358		-0.574675
								2.96426		-0.670597
								2.86716		-0.750599
								2.78835		-0.815225
								2.72214		-0.863601
								2.6621		-0.892442
								2.60393		-0.898899
								2.54748		-0.884374
								2.49483		-0.853562
								2.44744		-0.811581
								2.40526		-0.762065
								2.36671		-0.705279
								2.32876		-0.639103
								2.28786		-0.562903
								2.24289		-0.478537
								2.1961		-0.388477
								2.14936		-0.294901
								2.10218		-0.199754
								2.05472		-0.104796
								2.0087		-0.0116678
								1.96553		0.0780564
								1.92541		0.16281
								1.88731		0.240981
								1.84905		0.310858
								1.80724		0.371544
								1.75837		0.424833
								1.70162		0.474207
								1.63991		0.520975
								1.57606		0.564235
								1.50999		0.604685
								1.43967		0.644596
								1.36311		0.683949
								1.28032		0.719453
								1.19431		0.746439
								1.11115		0.760758
								1.03807		0.761643
								0.979715		0.75362
								0.937217		0.743626
								0.910128		0.735258
								0.897427		0.725904
								0.897528		0.709621
								0.908291		0.682903
								0.927021		0.647563
								0.950465		0.608835
								0.974797		0.571558
								0.995609		0.537318
								1.00885		0.50543
								1.01275		0.4768
								1.00779		0.454897
								0.994792		0.443855
								0.972999		0.447526
								0.939136		0.469486
								0.89029		0.512069
								0.827772		0.57444
								0.756186		0.652564
								0.680591		0.741091
								0.605583		0.835225
								0.535338		0.932593
								0.473663		1.03318
								0.42403		1.13737
								0.388658		1.2449
								0.366626		1.3548
								0.353891		1.46535
								0.345224		1.574
								0.336138		1.67729
								0.324808		1.7708
								0.312083		1.85005
								0.299573		1.91233
								0.288694		1.95671
								0.280679		1.983
								0.276582		1.99267
								0.277286		1.98887
								0.2835		1.97451
								0.295762		1.95124
								0.314434		1.91954

## Sheet: Fig.2e
response time -intact (ms)	61	95	273	67	61	184	255	89	126	120	NaN	161	100	181	144	84	187	113	129	98	194	119	77	83	69	NaN	164	203	71	79	82	152	107	123	136	36	209	152	215	101	73	186	94	144	62	92	91	163	93
response time -scramble (ms)	187	117	151	89	61	135	87	120	52	NaN	155	135	177	145	157	201	73	155	159	143	243	148	110	64	226	105	203	161	178	146	214	115	147	117	162	182	159	117	233	147	150	172	142	190	152	108	47	143	180
dash line (ms)	191.064
intact arrow (ms)	125.249
scramble arrow (ms)	142.796
[truncated: 357 more columns]

## Sheet: Fig.2f
response time -intact (ms)	264	197	209	180	175	228	252	264	192	263	206	229	258	260	251	244	226	179	175	239	235	240	204	215	232	273	260	238	233	193	299	207	228	199	200	230	218	237	248	230	245	273	220	241	239	192	NaN	219	NaN
response time -scramble (ms)	154	174	245	269	168	269	216	211	191	268	288	230	214	191	243	178	219	183	193	221	205	216	190	266	253	175	211	239	217	239	273	206	160	181	202	NaN	248	206	223	175	NaN	299	217	173	258	200	196	197	NaN
dash line (ms)	191.064
intact arrow (ms)	228.193
scramble arrow (ms)	213.971
[truncated: 357 more columns]

## Sheet: Fig.2g
top- congruent response time (ms)
		mean	row data
MA	intact	111.581	132.194	124.946	120.766	112.198	115.116	118.936	108.721	116.679	110.043	111.183	104.097	110.76	128.311	122.881	121.034	117.125	120.062	114.1	110.402	108.683	118.982	113.882	103.257	108.75	135.07	126.295	120.056	104.047	118.664	114.363	113.167	113.52	113.907	105.262	108.708	117.327	113.085	114.524	115.04	106.057	110.393	111.602	108.924	101.849	105.009	99.7439	107.451
	scramble	132.877	145.804	131.125	139.043	131.009	131.736	138.079	123.37	139.655	130.375	126.118	120.681	135.728	145.854	132.468	139.621	134.868	135.963	139.849	126.469	134.759	134.605	126.287	121.809	122.039	161.84	138.799	139.057	129.439	131.648	135.93	125.417	134.028	137.158	139.371	115.919	138.067	141.951	138.82	136.911	121.342	135.667	132.225	132.466	133.962	129.255	117.805	134.744
		mean	row data
MK	intact	158.269	137.698	154.962	156.879	152.902	174.067	168.645	174.161	174.157	174.754	156.725	154.467	156.458	144.068	158.273	161.111	159.598	178.069	177.319	169.5	186.75	179.365	159.528	154.871	152.76	133.415	156.47	155.516	156.806	174.233	167.339	162.414	180.888	185.693	155.527	151.903	155.149	142.076	146.47	146.623	154	169.187	160.568	166.411	164.15	169.685	145.576	148.638
	scramble	171.871	150.763	178.877	169.573	172.5	179.877	185.145	181.9	197.382	189.384	165.289	160.828	166.042	146.681	171.715	165.098	171.859	178.514	174.024	177.05	190.802	189.363	165.225	155.982	160.104	155.534	171.129	165.434	169.628	192.14	182.733	187.242	189.817	198.583	168.394	165.966	171.777	144.616	162.873	163.429	178.244	183.986	181.753	181.793	186.38	186.757	165.458	163.267
		mean	row data
ML	intact	143.559	131.968	151.158	148.421	159.479	163.694	145.095	162.803	134.133	125.755	132.821	145.912	145.024	132.211	147.932	153.919	160.36	160.667	149.706	160.829	144.37	128.861	133.793	147.713	140.079	126.857	145.593	150.717	156.87	156.769	147.087	155.886	134.582	117.422	136.674	142.471	138.695	119.644	136.983	144.873	150.415	154.382	142.992	151.6	130.01	112.434	130.537	132.17
	scramble	145.36	135.24	141.139	146.683	157.125	161.008	149.289	160.143	142.41	128.61	133.786	141.892	144.458	133.625	139.59	151.048	160.86	156.648	148.075	157.429	135.224	127.864	130.65	148.132	144.94	131.804	141.627	148.533	154.814	160.773	149.341	158.132	136.576	125.019	130.298	139.528	141.988	129.714	152.542	150.071	154.85	166.694	155.151	155.814	136.724	126.732	135.85	151.065
		mean	row data
MC	intact	169.512	174.209	179.858	164.112	153.113	157.95	181.59	169.036	186.079	181.491	171.887	155.261	157.481	169.105	176.254	158.345	156.898	157.215	181.704	167.578	184.053	185.035	184.525	156.758	163.569	177.964	172.826	166.661	160.278	154.971	180.028	164.759	184.83	183.822	170.654	157.947	162.433	165.915	167.891	165.907	146.889	156.459	176.65	167.89	182.429	175.491	170	149.154
	scramble	160.665	147.438	158.386	149.754	148.223	144.608	169.404	159.392	165.518	177.767	170.316	145.571	152.907	154.08	162.688	155.741	147.929	157.408	172.592	159.202	175.741	176.14	168.892	149.394	155.991	151.713	157.905	153.645	145.991	148.87	174.868	165.052	177.121	174.327	167.662	148.642	155.52	152.651	160.102	157.55	139.791	146.74	169.764	160.384	171.347	172.698	166.549	150.265
bottom- incongruent response time (ms)
		mean	row data
MA	intact	220.033	220.36	223.974	222.983	202.683	212.609	216.548	205.795	219.927	217.538	222.643	215.786	218.52	219.915	226.621	220.525	213.611	216.816	216.103	211.455	221.085	226.138	229.953	217.814	224.431	216.184	222.742	227.679	210.764	220.061	219.161	209.489	219.108	222.759	219.256	209.769	217.271	227.39	231.712	233.312	219.539	221.596	226.783	212.307	222.088	224.904	217.646	216.944
	scramble	201.246	210.5	218.071	213.877	196.173	196.188	196.525	186.2	195.92	198.68	200.64	183.721	200.418	211.85	215.391	206.544	194.049	196.345	192.565	188.966	197.108	199.309	201.59	196.111	197.617	215.902	216.153	212.543	195.774	197.657	194.305	192.646	193.455	195.907	195.895	190.389	201.456	216.95	220.397	218.344	202.198	200.284	197.333	190.122	194.936	201.211	199.357	189.603
		mean	row data
MK	intact	216.548	205.559	219.664	228.615	220.7	237.773	230.771	204.411	224.059	224.75	215.951	202.29	212.146	192.742	213.023	222.77	222.436	234.333	224.414	202.183	214.578	225.569	208.857	198.177	205.319	202.661	216.169	229.738	217.31	239.649	236.598	204.69	222.127	230.664	215.979	197.967	211.924	204.569	217.869	222.675	217.878	240.849	231.107	209.35	217.3	228.331	216.937	204.929
	scramble	207.031	195.509	206.779	213.042	211.2	231.36	225.6	195.481	215.623	219.203	206.965	196.054	201.152	185.017	208.172	211.444	204.842	226.318	221.59	199.172	207.49	213.521	202.345	192.383	197.202	189.553	202.712	212.357	208.013	227.293	221.947	196.259	211.472	216.743	201.029	191.867	201.927	189.474	210.792	216.23	208.243	231.845	224.847	193.017	207.221	218.233	206.458	186.981
		mean	row data
ML	intact	166.346	161.156	158.669	160.675	170.851	172.674	166.413	174.097	158.346	168.463	161.977	173.387	164.568	154.01	153.957	158.342	165.815	172.311	164.188	172.176	160.14	156.846	158.098	167.028	158.654	164.948	160.991	166.608	169.098	171.537	170.637	172.375	166.108	161.1	160.326	168.635	167.537	176.76	172.167	163.762	174.804	174.493	173.164	176.814	167.05	176.179	165.175	177.264
	scramble	162.514	163.302	162.861	161.133	173.216	169.617	164.581	170.229	166.46	152.593	164.047	169.206	163.78	146.3	156.627	156.103	163.929	162.705	161.164	170.242	162.602	156.732	152.23	161.346	164.707	160.533	156.061	162.349	163.4	171.924	162.119	170.343	162.4	162.759	159.707	158.582	160.085	161.041	158.733	159.467	169.223	170.1	166.119	171.771	165.029	165.009	157.738	167.085
		mean	row data
MC	intact	195.109	191.545	203.174	191.195	181.698	190.925	207.013	190.983	208.881	209.392	198.275	189.461	188.039	193.645	205.485	191.342	182.26	191.444	207.764	190.153	202.426	206.812	199.571	188.157	187.961	192.609	202.324	191.775	185.339	186.257	204.459	188.595	206.877	203.545	199	184.641	188.51	192.509	204.008	198.552	181.98	189.029	209.879	195.017	207.31	207.975	199.959	191
	scramble	193.205	195.045	209.914	195.723	183.43	185.146	206.111	192.475	205.655	206.483	197.256	183.897	184.296	190.676	205.051	190.851	180.418	183.311	200.601	190.675	204.17	204.653	190.793	183.352	182.519	194.37	202.701	190.698	181.895	184.048	203.37	191.474	202.797	202.492	192.939	183.377	183.99	196.918	206.279	196.175	183.769	187.552	203.127	191.307	202.409	205.816	197.512	183.608
[truncated: 25 more columns]

## Sheet: Fig.2h
congruent	distractor bias (ms)	errorbar
	-42.7409	15.3307
	-26.1303	14.0094
	-3.67681	12.4522
	18.1771	13.3042
incongruent	distractor bias (ms)	errorbar
	36.8533	15.185
	19.1466	7.33338
	7.34077	9.93253
	3.79383	7.32944

## Sheet: Fig.2i
	distractor bias (ms)	errorbar
	80.1432	24.9285
	45.7713	16.8569
	11.2333	19.2786
	-14.8833	18.5127

## Sheet: Fig.2j
scatter point	social engagment index	distractor bias (ms)	errorbar
	-4	80.1432	24.9285
	-2	45.7713	16.8569
	2	11.2333	19.2786
	4	-14.8833	18.5127
fitted curve	social engagment index	distractor bias (ms)
	-4	75.4843
	-3.992	75.3945
	-3.984	75.3046
	-3.976	75.2148
	-3.968	75.125
	-3.96	75.0351
	-3.952	74.9453
	-3.944	74.8555
	-3.936	74.7656
	-3.928	74.6758
	-3.92	74.5859
	-3.912	74.4961
	-3.904	74.4063
	-3.896	74.3164
	-3.888	74.2266
	-3.88	74.1368
	-3.872	74.0469
	-3.864	73.9571
	-3.856	73.8673
	-3.848	73.7774
	-3.84	73.6876
	-3.832	73.5978
	-3.824	73.5079
	-3.816	73.4181
	-3.808	73.3282
	-3.8	73.2384
	-3.792	73.1486
	-3.784	73.0587
	-3.776	72.9689
	-3.768	72.8791
	-3.76	72.7892
	-3.752	72.6994
	-3.744	72.6095
	-3.736	72.5197
	-3.728	72.4299
	-3.72	72.34
	-3.712	72.2502
	-3.704	72.1604
	-3.696	72.0705
	-3.688	71.9807
	-3.68	71.8909
	-3.672	71.801
	-3.664	71.7112
	-3.656	71.6213
	-3.648	71.5315
	-3.64	71.4417
	-3.632	71.3518
	-3.624	71.262
	-3.616	71.1722
	-3.608	71.0823
	-3.6	70.9925
	-3.592	70.9027
	-3.584	70.8128
	-3.576	70.723
	-3.568	70.6332
	-3.56	70.5433
	-3.552	70.4535
	-3.544	70.3636
	-3.536	70.2738
	-3.528	70.184
	-3.52	70.0941
	-3.512	70.0043
	-3.504	69.9145
	-3.496	69.8246
	-3.488	69.7348
	-3.48	69.6449
	-3.472	69.5551
	-3.464	69.4653
	-3.456	69.3754
	-3.448	69.2856
	-3.44	69.1958
	-3.432	69.1059
	-3.424	69.0161
	-3.416	68.9263
	-3.408	68.8364
	-3.4	68.7466
	-3.392	68.6567
	-3.384	68.5669
	-3.376	68.4771
	-3.368	68.3872
	-3.36	68.2974
	-3.352	68.2076
	-3.344	68.1177
	-3.336	68.0279
	-3.328	67.9381
	-3.32	67.8482
	-3.312	67.7584
	-3.304	67.6685
	-3.296	67.5787
	-3.288	67.4889
	-3.28	67.399
	-3.272	67.3092
	-3.264	67.2194
	-3.256	67.1295
	-3.248	67.0397
	-3.24	66.9498
	-3.232	66.86
	-3.224	66.7702
	-3.216	66.6803
	-3.208	66.5905
	-3.2	66.5007
	-3.192	66.4108
	-3.184	66.321
	-3.176	66.2312
	-3.168	66.1413
	-3.16	66.0515
	-3.152	65.9617
	-3.144	65.8718
	-3.136	65.782
	-3.128	65.6921
	-3.12	65.6023
	-3.112	65.5125
	-3.104	65.4226
	-3.096	65.3328
	-3.088	65.243
	-3.08	65.1531
	-3.072	65.0633
	-3.064	64.9734
	-3.056	64.8836
	-3.048	64.7938
	-3.04	64.7039
	-3.032	64.6141
	-3.024	64.5243
	-3.016	64.4344
	-3.008	64.3446
	-3	64.2548
	-2.992	64.1649
	-2.984	64.0751
	-2.976	63.9853
	-2.968	63.8954
	-2.96	63.8056
	-2.952	63.7157
	-2.944	63.6259
	-2.936	63.5361
	-2.928	63.4462
	-2.92	63.3564
	-2.912	63.2666
	-2.904	63.1767
	-2.896	63.0869
	-2.888	62.9971
	-2.88	62.9072
	-2.872	62.8174
	-2.864	62.7275
	-2.856	62.6377
	-2.848	62.5479
	-2.84	62.458
	-2.832	62.3682
	-2.824	62.2784
	-2.816	62.1885
	-2.808	62.0987
	-2.8	62.0089
	-2.792	61.919
	-2.784	61.8292
	-2.776	61.7393
	-2.768	61.6495
	-2.76	61.5597
	-2.752	61.4698
	-2.744	61.38
	-2.736	61.2902
	-2.728	61.2003
	-2.72	61.1105
	-2.712	61.0207
	-2.704	60.9308
	-2.696	60.841
	-2.688	60.7511
	-2.68	60.6613
	-2.672	60.5715
	-2.664	60.4816
	-2.656	60.3918
	-2.648	60.302
	-2.64	60.2121
	-2.632	60.1223
	-2.624	60.0324
	-2.616	59.9426
	-2.608	59.8528
	-2.6	59.7629
	-2.592	59.6731
	-2.584	59.5833
	-2.576	59.4934
	-2.568	59.4036
	-2.56	59.3138
	-2.552	59.2239
	-2.544	59.1341
	-2.536	59.0442
	-2.528	58.9544
	-2.52	58.8646
	-2.512	58.7747
	-2.504	58.6849
	-2.496	58.5951
	-2.488	58.5052
	-2.48	58.4154
	-2.472	58.3256
	-2.464	58.2357
	-2.456	58.1459
	-2.448	58.056
	-2.44	57.9662
	-2.432	57.8764
	-2.424	57.7865
	-2.416	57.6967
	-2.408	57.6069
	-2.4	57.517
	-2.392	57.4272
	-2.384	57.3374
	-2.376	57.2475
	-2.368	57.1577
	-2.36	57.0678
	-2.352	56.978
	-2.344	56.8882
	-2.336	56.7983
	-2.328	56.7085
	-2.32	56.6187
	-2.312	56.5288
	-2.304	56.439
	-2.296	56.3492
	-2.288	56.2593
	-2.28	56.1695
	-2.272	56.0796
	-2.264	55.9898
	-2.256	55.9
	-2.248	55.8101
	-2.24	55.7203
	-2.232	55.6305
	-2.224	55.5406
	-2.216	55.4508
	-2.208	55.361
	-2.2	55.2711
	-2.192	55.1813
	-2.184	55.0914
	-2.176	55.0016
	-2.168	54.9118
	-2.16	54.8219
	-2.152	54.7321
	-2.144	54.6423
	-2.136	54.5524
	-2.128	54.4626
	-2.12	54.3728
	-2.112	54.2829
	-2.104	54.1931
	-2.096	54.1032
	-2.088	54.0134
	-2.08	53.9236
	-2.072	53.8337
	-2.064	53.7439
	-2.056	53.6541
	-2.048	53.5642
	-2.04	53.4744
	-2.032	53.3846
	-2.024	53.2947
	-2.016	53.2049
	-2.008	53.115
	-2	53.0252
	-1.992	52.9354
	-1.984	52.8455
	-1.976	52.7557
	-1.968	52.6659
	-1.96	52.576
	-1.952	52.4862
	-1.944	52.3964
	-1.936	52.3065
	-1.928	52.2167
	-1.92	52.1268
	-1.912	52.037
	-1.904	51.9472
	-1.896	51.8573
	-1.888	51.7675
	-1.88	51.6777
	-1.872	51.5878
	-1.864	51.498
	-1.856	51.4082
	-1.848	51.3183
	-1.84	51.2285
	-1.832	51.1386
	-1.824	51.0488
	-1.816	50.959
	-1.808	50.8691
	-1.8	50.7793
	-1.792	50.6895
	-1.784	50.5996
	-1.776	50.5098
	-1.768	50.42
	-1.76	50.3301
	-1.752	50.2403
	-1.744	50.1504
	-1.736	50.0606
	-1.728	49.9708
	-1.72	49.8809
	-1.712	49.7911
	-1.704	49.7013
	-1.696	49.6114
	-1.688	49.5216
	-1.68	49.4318
	-1.672	49.3419
	-1.664	49.2521
	-1.656	49.1622
	-1.648	49.0724
	-1.64	48.9826
	-1.632	48.8927
	-1.624	48.8029
	-1.616	48.7131
	-1.608	48.6232
	-1.6	48.5334
	-1.592	48.4436
	-1.584	48.3537
	-1.576	48.2639
	-1.568	48.174
	-1.56	48.0842
	-1.552	47.9944
	-1.544	47.9045
	-1.536	47.8147
	-1.528	47.7249
	-1.52	47.635
	-1.512	47.5452
	-1.504	47.4554
	-1.496	47.3655
	-1.488	47.2757
	-1.48	47.1858
	-1.472	47.096
	-1.464	47.0062
	-1.456	46.9163
	-1.448	46.8265
	-1.44	46.7367
	-1.432	46.6468
	-1.424	46.557
	-1.416	46.4671
	-1.408	46.3773
	-1.4	46.2875
	-1.392	46.1976
	-1.384	46.1078
	-1.376	46.018
	-1.368	45.9281
	-1.36	45.8383
	-1.352	45.7485
	-1.344	45.6586
	-1.336	45.5688
	-1.328	45.4789
	-1.32	45.3891
	-1.312	45.2993
	-1.304	45.2094
	-1.296	45.1196
	-1.288	45.0298
	-1.28	44.9399
	-1.272	44.8501
	-1.264	44.7603
	-1.256	44.6704
	-1.248	44.5806
	-1.24	44.4907
	-1.232	44.4009
	-1.224	44.3111
	-1.216	44.2212
	-1.208	44.1314
	-1.2	44.0416
	-1.192	43.9517
	-1.184	43.8619
	-1.176	43.7721
	-1.168	43.6822
	-1.16	43.5924
	-1.152	43.5025
	-1.144	43.4127
	-1.136	43.3229
	-1.128	43.233
	-1.12	43.1432
	-1.112	43.0534
	-1.104	42.9635
	-1.096	42.8737
	-1.088	42.7839
	-1.08	42.694
	-1.072	42.6042
	-1.064	42.5144
	-1.056	42.4245
	-1.048	42.3347
	-1.04	42.2448
	-1.032	42.155
	-1.024	42.0652
	-1.016	41.9753
	-1.008	41.8855
	-1	41.7957
	-0.992	41.7058
	-0.984	41.616
	-0.976	41.5262
	-0.968	41.4363
	-0.96	41.3465
	-0.952	41.2566
	-0.944	41.1668
	-0.936	41.077
	-0.928	40.9871
	-0.92	40.8973
	-0.912	40.8075
	-0.904	40.7176
	-0.896	40.6278
	-0.888	40.538
	-0.88	40.4481
	-0.872	40.3583
	-0.864	40.2684
	-0.856	40.1786
	-0.848	40.0888
	-0.84	39.9989
	-0.832	39.9091
	-0.824	39.8193
	-0.816	39.7294
	-0.808	39.6396
	-0.8	39.5497
	-0.792	39.4599
	-0.784	39.3701
	-0.776	39.2802
	-0.768	39.1904
	-0.76	39.1006
	-0.752	39.0107
	-0.744	38.9209
	-0.736	38.8311
	-0.728	38.7412
	-0.72	38.6514
	-0.712	38.5615
	-0.704	38.4717
	-0.696	38.3819
	-0.688	38.292
	-0.68	38.2022
	-0.672	38.1124
	-0.664	38.0225
	-0.656	37.9327
	-0.648	37.8429
	-0.64	37.753
	-0.632	37.6632
	-0.624	37.5733
	-0.616	37.4835
	-0.608	37.3937
	-0.6	37.3038
	-0.592	37.214
	-0.584	37.1242
	-0.576	37.0343
	-0.568	36.9445
	-0.56	36.8547
	-0.552	36.7648
	-0.544	36.675
	-0.536	36.5851
	-0.528	36.4953
	-0.52	36.4055
	-0.512	36.3156
	-0.504	36.2258
	-0.496	36.136
	-0.488	36.0461
	-0.48	35.9563
	-0.472	35.8665
	-0.464	35.7766
	-0.456	35.6868
	-0.448	35.5969
	-0.44	35.5071
	-0.432	35.4173
	-0.424	35.3274
	-0.416	35.2376
	-0.408	35.1478
	-0.4	35.0579
	-0.392	34.9681
	-0.384	34.8783
	-0.376	34.7884
	-0.368	34.6986
	-0.36	34.6087
	-0.352	34.5189
	-0.344	34.4291
	-0.336	34.3392
	-0.328	34.2494
	-0.32	34.1596
	-0.312	34.0697
	-0.304	33.9799
	-0.296	33.8901
	-0.288	33.8002
	-0.28	33.7104
	-0.272	33.6205
	-0.264	33.5307
	-0.256	33.4409
	-0.248	33.351
	-0.24	33.2612
	-0.232	33.1714
	-0.224	33.0815
	-0.216	32.9917
	-0.208	32.9019
	-0.2	32.812
	-0.192	32.7222
	-0.184	32.6323
	-0.176	32.5425
	-0.168	32.4527
	-0.16	32.3628
	-0.152	32.273
	-0.144	32.1832
	-0.136	32.0933
	-0.128	32.0035
	-0.12	31.9137
	-0.112	31.8238
	-0.104	31.734
	-0.096	31.6441
	-0.088	31.5543
	-0.08	31.4645
	-0.072	31.3746
	-0.064	31.2848
	-0.056	31.195
	-0.048	31.1051
	-0.04	31.0153
	-0.032	30.9255
	-0.024	30.8356
	-0.016	30.7458
	-0.008	30.6559
	0	30.5661
	0.008	30.4763
	0.016	30.3864
	0.024	30.2966
	0.032	30.2068
	0.04	30.1169
	0.048	30.0271
	0.056	29.9373
	0.064	29.8474
	0.072	29.7576
	0.08	29.6677
	0.088	29.5779
	0.096	29.4881
	0.104	29.3982
	0.112	29.3084
	0.12	29.2186
	0.128	29.1287
	0.136	29.0389
	0.144	28.949
	0.152	28.8592
	0.16	28.7694
	0.168	28.6795
	0.176	28.5897
	0.184	28.4999
	0.192	28.41
	0.2	28.3202
	0.208	28.2304
	0.216	28.1405
	0.224	28.0507
	0.232	27.9609
	0.24	27.871
	0.248	27.7812
	0.256	27.6913
	0.264	27.6015
	0.272	27.5117
	0.28	27.4218
	0.288	27.332
	0.296	27.2422
	0.304	27.1523
	0.312	27.0625
	0.32	26.9727
	0.328	26.8828
	0.336	26.793
	0.344	26.7031
	0.352	26.6133
	0.36	26.5235
	0.368	26.4336
	0.376	26.3438
	0.384	26.254
	0.392	26.1641
	0.4	26.0743
	0.408	25.9844
	0.416	25.8946
	0.424	25.8048
	0.432	25.7149
	0.44	25.6251
	0.448	25.5353
	0.456	25.4454
	0.464	25.3556
	0.472	25.2658
	0.48	25.1759
	0.488	25.0861
	0.496	24.9962
	0.504	24.9064
	0.512	24.8166
	0.52	24.7267
	0.528	24.6369
	0.536	24.5471
	0.544	24.4572
	0.552	24.3674
	0.56	24.2776
	0.568	24.1877
	0.576	24.0979
	0.584	24.008
	0.592	23.9182
	0.6	23.8284
	0.608	23.7385
	0.616	23.6487
	0.624	23.5589
	0.632	23.469
	0.64	23.3792
	0.648	23.2894
	0.656	23.1995
	0.664	23.1097
	0.672	23.0198
	0.68	22.93
	0.688	22.8402
	0.696	22.7503
	0.704	22.6605
	0.712	22.5707
	0.72	22.4808
	0.728	22.391
	0.736	22.3012
	0.744	22.2113
	0.752	22.1215
	0.76	22.0316
	0.768	21.9418
	0.776	21.852
	0.784	21.7621
	0.792	21.6723
	0.8	21.5825
	0.808	21.4926
	0.816	21.4028
	0.824	21.313
	0.832	21.2231
	0.84	21.1333
	0.848	21.0434
	0.856	20.9536
	0.864	20.8638
	0.872	20.7739
	0.88	20.6841
	0.888	20.5943
	0.896	20.5044
	0.904	20.4146
	0.912	20.3248
	0.92	20.2349
	0.928	20.1451
	0.936	20.0552
	0.944	19.9654
	0.952	19.8756
	0.96	19.7857
	0.968	19.6959
	0.976	19.6061
	0.984	19.5162
	0.992	19.4264
	1	19.3366
	1.008	19.2467
	1.016	19.1569
	1.024	19.067
	1.032	18.9772
	1.04	18.8874
	1.048	18.7975
	1.056	18.7077
	1.064	18.6179
	1.072	18.528
	1.08	18.4382
	1.088	18.3484
	1.096	18.2585
	1.104	18.1687
	1.112	18.0788
	1.12	17.989
	1.128	17.8992
	1.136	17.8093
	1.144	17.7195
	1.152	17.6297
	1.16	17.5398
	1.168	17.45
	1.176	17.3602
	1.184	17.2703
	1.192	17.1805
	1.2	17.0906
	1.208	17.0008
	1.216	16.911
	1.224	16.8211
	1.232	16.7313
	1.24	16.6415
	1.248	16.5516
	1.256	16.4618
	1.264	16.372
	1.272	16.2821
	1.28	16.1923
	1.288	16.1024
	1.296	16.0126
	1.304	15.9228
	1.312	15.8329
	1.32	15.7431
	1.328	15.6533
	1.336	15.5634
	1.344	15.4736
	1.352	15.3838
	1.36	15.2939
	1.368	15.2041
	1.376	15.1142
	1.384	15.0244
	1.392	14.9346
	1.4	14.8447
	1.408	14.7549
	1.416	14.6651
	1.424	14.5752
	1.432	14.4854
	1.44	14.3956
	1.448	14.3057
	1.456	14.2159
	1.464	14.126
	1.472	14.0362
	1.48	13.9464
	1.488	13.8565
	1.496	13.7667
	1.504	13.6769
	1.512	13.587
	1.52	13.4972
	1.528	13.4074
	1.536	13.3175
	1.544	13.2277
	1.552	13.1378
	1.56	13.048
	1.568	12.9582
	1.576	12.8683
	1.584	12.7785
	1.592	12.6887
	1.6	12.5988
	1.608	12.509
	1.616	12.4192
	1.624	12.3293
	1.632	12.2395
	1.64	12.1496
	1.648	12.0598
	1.656	11.97
	1.664	11.8801
	1.672	11.7903
	1.68	11.7005
	1.688	11.6106
	1.696	11.5208
	1.704	11.431
	1.712	11.3411
	1.72	11.2513
	1.728	11.1614
	1.736	11.0716
	1.744	10.9818
	1.752	10.8919
	1.76	10.8021
	1.768	10.7123
	1.776	10.6224
	1.784	10.5326
	1.792	10.4428
	1.8	10.3529
	1.808	10.2631
	1.816	10.1732
	1.824	10.0834
	1.832	9.99357
	1.84	9.90373
	1.848	9.8139
	1.856	9.72406
	1.864	9.63422
	1.872	9.54439
	1.88	9.45455
	1.888	9.36472
	1.896	9.27488
	1.904	9.18504
	1.912	9.0952
	1.92	9.00537
	1.928	8.91553
	1.936	8.8257
	1.944	8.73586
	1.952	8.64602
	1.96	8.55619
	1.968	8.46635
	1.976	8.37651
	1.984	8.28668
	1.992	8.19684
	2	8.107
	2.008	8.01717
	2.016	7.92733
	2.024	7.8375
	2.032	7.74766
	2.04	7.65782
	2.048	7.56799
	2.056	7.47815
	2.064	7.38831
	2.072	7.29848
	2.08	7.20864
	2.088	7.1188
	2.096	7.02897
	2.104	6.93913
	2.112	6.84929
	2.12	6.75946
	2.128	6.66962
	2.136	6.57979
	2.144	6.48995
	2.152	6.40011
	2.16	6.31028
	2.168	6.22044
	2.176	6.1306
	2.184	6.04077
	2.192	5.95093
	2.2	5.86109
	2.208	5.77126
	2.216	5.68142
	2.224	5.59159
	2.232	5.50175
	2.24	5.41191
	2.248	5.32208
	2.256	5.23224
	2.264	5.1424
	2.272	5.05257
	2.28	4.96273
	2.288	4.87289
	2.296	4.78306
	2.304	4.69322
	2.312	4.60338
	2.32	4.51355
	2.328	4.42371
	2.336	4.33387
	2.344	4.24404
	2.352	4.1542
	2.36	4.06437
	2.368	3.97453
	2.376	3.88469
	2.384	3.79486
	2.392	3.70502
	2.4	3.61518
	2.408	3.52535
	2.416	3.43551
	2.424	3.34567
	2.432	3.25584
	2.44	3.166
	2.448	3.07617
	2.456	2.98633
	2.464	2.89649
	2.472	2.80666
	2.48	2.71682
	2.488	2.62698
	2.496	2.53715
	2.504	2.44731
	2.512	2.35747
	2.52	2.26764
	2.528	2.1778
	2.536	2.08797
	2.544	1.99813
	2.552	1.90829
	2.56	1.81846
	2.568	1.72862
	2.576	1.63878
	2.584	1.54895
	2.592	1.45911
	2.6	1.36927
	2.608	1.27944
	2.616	1.1896
	2.624	1.09976
	2.632	1.00993
	2.64	0.920092
	2.648	0.830255
	2.656	0.740419
	2.664	0.650582
	2.672	0.560746
	2.68	0.47091
	2.688	0.381073
	2.696	0.291237
	2.704	0.2014
	2.712	0.111564
	2.72	0.0217276
	2.728	-0.0681088
	2.736	-0.157945
	2.744	-0.247782
	2.752	-0.337618
	2.76	-0.427454
	2.768	-0.517291
	2.776	-0.607127
	2.784	-0.696964
	2.792	-0.7868
	2.8	-0.876636
	2.808	-0.966473
	2.816	-1.05631
	2.824	-1.14615
	2.832	-1.23598
	2.84	-1.32582
	2.848	-1.41565
	2.856	-1.50549
	2.864	-1.59533
	2.872	-1.68516
	2.88	-1.775
	2.888	-1.86484
	2.896	-1.95467
	2.904	-2.04451
	2.912	-2.13435
	2.92	-2.22418
	2.928	-2.31402
	2.936	-2.40386
	2.944	-2.49369
	2.952	-2.58353
	2.96	-2.67336
	2.968	-2.7632
	2.976	-2.85304
	2.984	-2.94287
	2.992	-3.03271
	3	-3.12255
	3.008	-3.21238
	3.016	-3.30222
	3.024	-3.39206
	3.032	-3.48189
	3.04	-3.57173
	3.048	-3.66156
	3.056	-3.7514
	3.064	-3.84124
	3.072	-3.93107
	3.08	-4.02091
	3.088	-4.11075
	3.096	-4.20058
	3.104	-4.29042
	3.112	-4.38026
	3.12	-4.47009
	3.128	-4.55993
	3.136	-4.64977
	3.144	-4.7396
	3.152	-4.82944
	3.16	-4.91927
	3.168	-5.00911
	3.176	-5.09895
	3.184	-5.18878
	3.192	-5.27862
	3.2	-5.36846
	3.208	-5.45829
	3.216	-5.54813
	3.224	-5.63797
	3.232	-5.7278
	3.24	-5.81764
	3.248	-5.90748
	3.256	-5.99731
	3.264	-6.08715
	3.272	-6.17699
	3.28	-6.26682
	3.288	-6.35666
	3.296	-6.44649
	3.304	-6.53633
	3.312	-6.62617
	3.32	-6.716
	3.328	-6.80584
	3.336	-6.89568
	3.344	-6.98551
	3.352	-7.07535
	3.36	-7.16519
	3.368	-7.25502
	3.376	-7.34486
	3.384	-7.43469
	3.392	-7.52453
	3.4	-7.61437
	3.408	-7.7042
	3.416	-7.79404
	3.424	-7.88388
	3.432	-7.97371
	3.44	-8.06355
	3.448	-8.15339
	3.456	-8.24322
	3.464	-8.33306
	3.472	-8.42289
	3.48	-8.51273
	3.488	-8.60257
	3.496	-8.6924
	3.504	-8.78224
	3.512	-8.87208
	3.52	-8.96191
	3.528	-9.05175
	3.536	-9.14159
	3.544	-9.23142
	3.552	-9.32126
	3.56	-9.4111
	3.568	-9.50093
	3.576	-9.59077
	3.584	-9.6806
	3.592	-9.77044
	3.6	-9.86028
	3.608	-9.95011
	3.616	-10.0399
	3.624	-10.1298
	3.632	-10.2196
	3.64	-10.3095
	3.648	-10.3993
	3.656	-10.4891
	3.664	-10.579
	3.672	-10.6688
	3.68	-10.7586
	3.688	-10.8485
	3.696	-10.9383
	3.704	-11.0282
	3.712	-11.118
	3.72	-11.2078
	3.728	-11.2977
	3.736	-11.3875
	3.744	-11.4773
	3.752	-11.5672
	3.76	-11.657
	3.768	-11.7468
	3.776	-11.8367
	3.784	-11.9265
	3.792	-12.0164
	3.8	-12.1062
	3.808	-12.196
	3.816	-12.2859
	3.824	-12.3757
	3.832	-12.4655
	3.84	-12.5554
	3.848	-12.6452
	3.856	-12.735
	3.864	-12.8249
	3.872	-12.9147
	3.88	-13.0046
	3.888	-13.0944
	3.896	-13.1842
	3.904	-13.2741
	3.912	-13.3639
	3.92	-13.4537
	3.928	-13.5436
	3.936	-13.6334
	3.944	-13.7232
	3.952	-13.8131
	3.96	-13.9029
	3.968	-13.9928
	3.976	-14.0826
	3.984	-14.1724
	3.992	-14.2623
	4	-14.3521
