# Supplementary material for: Multi-dimensional social relationships shape social attention in monkeys
Source: eLife. 2025 Mar 7;14:RP104460. doi: 10.7554/eLife.104460 (PMC11888598; doi:10.7554/eLife.104460)
Supplement: Figure 3—figure supplement 1—source data 1. [file elife-104460-fig3-figsupp1-data1.xlsx]

## Sheet: Fig.S2b
top-eye position	initial saccade	x position	y position		corrective saccade	x position	y position		bottom -eye velocity	gray line: fixation (deg/s)	red line : initial saccade (deg/s)	blue line : corrective saccade (deg/s)
		0	0			-15.2912	0.948449			-7.24931	-1.15602	-0.897712
		-0.00500726	-0.00081173			-15.271	0.945485			-7.02831	-3.83186	3.1586
		-0.00985993	-0.00163515			-15.2434	0.942256			-6.80576	-7.05024	7.97368
		-0.0145553	-0.002475			-15.2072	0.938752			-6.58157	-10.8593	13.6161
		-0.0190894	-0.00333512			-15.1615	0.934968			-6.35726	-15.3028	20.1511
		-0.0234575	-0.00421794			-15.1052	0.930899			-6.13411	-20.4164	27.6392
		-0.0276527	-0.00512492			-15.0371	0.92654			-5.91144	-26.2294	36.1341
		-0.0316675	-0.00605885			-14.9562	0.921883			-5.68865	-32.7657	45.6826
		-0.0354967	-0.00702525			-14.8612	0.916921			-5.46723	-40.0446	56.3234
		-0.0391388	-0.00802985			-14.7511	0.911645			-5.24905	-48.0793	68.0833
		-0.042595	-0.00907513			-14.6247	0.906053			-5.03453	-56.8737	80.9742
		-0.0458664	-0.0101588			-14.4812	0.900145			-4.82469	-66.4191	94.9927
		-0.0489522	-0.0112729			-14.3194	0.893922			-4.62323	-76.6956	110.12
		-0.0518486	-0.0124046			-14.1386	0.887387			-4.43472	-87.6741	126.322
		-0.0545508	-0.0135388			-13.9379	0.880539			-4.26183	-99.3126	143.549
		-0.0570568	-0.0146635			-13.7167	0.873376			-4.10452	-111.553	161.74
		-0.0593697	-0.0157721			-13.4743	0.865893			-3.96014	-124.32	180.818
		-0.0614972	-0.0168604			-13.2102	0.858086			-3.82444	-137.531	200.691
		-0.06345	-0.0179244			-12.9243	0.849956			-3.69461	-151.093	221.258
		-0.0652407	-0.0189603			-12.6161	0.841508			-3.57122	-164.907	242.408
		-0.0668822	-0.019964			-12.2858	0.832754			-3.45642	-178.87	264.023
		-0.0683873	-0.0209296			-11.9333	0.823703			-3.35112	-192.872	285.979
		-0.0697678	-0.0218503			-11.5588	0.814368			-3.2541	-206.804	308.14
		-0.0710371	-0.0227213			-11.1629	0.804754			-3.16209	-220.558	330.365
		-0.072211	-0.0235395			-10.7459	0.794866			-3.07078	-234.022	352.508
		-0.0733051	-0.0243038			-10.3085	0.784704			-2.97679	-247.083	374.425
		-0.0743309	-0.0250136			-9.8515	0.774267			-2.87773	-259.624	395.969
		-0.0752946	-0.0256693			-9.37584	0.763552			-2.77131	-271.528	417.001
		-0.0761972	-0.0262711			-8.88251	0.752557			-2.65636	-282.684	437.381
		-0.0770377	-0.026819			-8.37266	0.741282			-2.53287	-292.986	456.978
		-0.0778175	-0.0273135			-7.84753	0.72973			-2.40114	-302.341	475.665
		-0.0785407	-0.0277578			-7.30844	0.717905			-2.26277	-310.665	493.325
		-0.0792128	-0.0281595			-6.75679	0.705811			-2.11983	-317.887	509.848
		-0.0798409	-0.0285285			-6.19406	0.693454			-1.97204	-323.952	525.134
		-0.0804328	-0.0288739			-5.62178	0.68084			-1.81877	-328.823	539.094
		-0.0809924	-0.0292028			-5.04154	0.667972			-1.66298	-332.48	551.648
		-0.0815195	-0.0295199			-4.45495	0.654853			-1.51035	-334.914	562.729
		-0.0820134	-0.0298276			-3.86368	0.641477			-1.36651	-336.132	572.277
		-0.082473	-0.0301264			-3.26939	0.627838			-1.23518	-336.152	580.243
		-0.0828964	-0.0304179			-2.67377	0.613929			-1.11637	-335.006	586.585
		-0.0832818	-0.0307065			-2.07845	0.599745			-1.00741	-332.74	591.271
		-0.0836304	-0.0309971			-1.48507	0.585284			-0.90687	-329.41	594.286
		-0.0839473	-0.0312922			-0.8952	0.570549			-0.815557	-325.077	595.629
		-0.0842407	-0.0315917			-0.310372	0.555546			-0.734689	-319.81	595.317
		-0.0845226	-0.0318956			0.267952	0.54029			-0.66498	-313.685	593.382
		-0.0848067	-0.0322067			0.838373	0.524802			-0.606687	-306.784	589.867
		-0.0851051	-0.0325312			1.39957	0.509107			-0.559656	-299.197	584.828
		-0.0854231	-0.032878			1.9503	0.493232			-0.523357	-291.021	578.324
		-0.0857578	-0.0332549			2.48943	0.477204			-0.496915	-282.35	570.421
		-0.0861003	-0.0336664			3.01594	0.461049			-0.479127	-273.279	561.194
		-0.086437	-0.0341116			3.52891	0.444796			-0.468486	-263.893	550.731
		-0.0867524	-0.0345856			4.02756	0.428476			-0.463188	-254.279	539.132
		-0.0870319	-0.0350818			4.5112	0.412126			-0.461137	-244.514	526.507
		-0.0872626	-0.0355936			4.97928	0.395784			-0.459955	-234.674	512.973
		-0.0874326	-0.0361131			5.43135	0.37949			-0.45698	-224.824	498.647
		-0.0875318	-0.0366315			5.86708	0.363289			-0.449266	-215.023	483.645
		-0.0875509	-0.0371434			6.28624	0.347226			-0.433591	-205.327	468.08
		-0.0874819	-0.0376465			6.6887	0.331348			-0.406458	-195.782	452.069
		-0.0873178	-0.03814			7.07445	0.315704			-0.364108	-186.424	435.726
		-0.0870527	-0.038623			7.44355	0.300339			-0.302535	-177.286	419.158
		-0.0866821	-0.0390954			7.79613	0.285293			-0.218479	-168.393	402.468
		-0.0862029	-0.0395593			8.13241	0.270601			-0.112333	-159.768	385.75
		-0.0856135	-0.0400179			8.45269	0.25629			0.00988021	-151.431	369.093
		-0.0849144	-0.0404714			8.7573	0.242376			0.139325	-143.396	352.58
		-0.0841084	-0.0409166			9.04665	0.228861			0.269077	-135.675	336.284
		-0.0832008	-0.0413504			9.32117	0.215735			0.394042	-128.277	320.276
		-0.0822004	-0.0417707			9.58133	0.202982			0.508005	-121.205	304.615
		-0.0811196	-0.0421742			9.82761	0.190579			0.605471	-114.459	289.35
		-0.0799753	-0.0425548			10.0605	0.1785			0.685433	-108.034	274.519
		-0.0787894	-0.0429051			10.2807	0.166714			0.749395	-101.923	260.154
		-0.0775885	-0.043218			10.4885	0.155199			0.79653	-96.1213	246.283
		-0.076401	-0.0434904			10.6846	0.143937			0.823634	-90.6245	232.93
		-0.0752529	-0.0437231			10.8696	0.132921			0.828939	-85.425	220.113
		-0.0741674	-0.0439212			11.044	0.122148			0.814018	-80.5113	207.847
		-0.0731668	-0.044093			11.2083	0.111625			0.783773	-75.871	196.135
		-0.0722721	-0.0442454			11.3631	0.101355			0.744533	-71.4922	184.981
		-0.0715038	-0.0443799			11.509	0.0913456			0.700228	-67.3633	174.38
		-0.070883	-0.0444919			11.6463	0.0815984			0.651456	-63.4737	164.33
		-0.0704302	-0.0445754			11.7756	0.0721177			0.597428	-59.8128	154.817
		-0.0701629	-0.0446272			11.8974	0.0629068			0.536957	-56.3673	145.824
		-0.0700947	-0.0446474			12.0121	0.0539669			0.46945	-53.1227	137.333
		-0.0702355	-0.0446397			12.1201	0.0452957			0.396863	-50.0661	129.325
		-0.0705917	-0.0446108			12.2218	0.0368885			0.322783	-47.1867	121.78
		-0.0711659	-0.0445714			12.3177	0.0287383			0.248639	-44.4744	114.68
		-0.0719568	-0.0445341			12.408	0.0208354			0.172782	-41.9198	108.005
		-0.0729588	-0.0445106			12.4931	0.0131688			0.0934103	-39.5142	101.733
		-0.0741616	-0.0445061			12.5733	0.00572858			0.0114965	-37.2506	95.8404
		-0.0755496	-0.0445199			12.6489	-0.00149257			-0.0701263	-35.1258	90.306
		-0.0771008	-0.04455			12.7202	-0.00850107			-0.15055	-33.1365	85.1065
		-0.0787865	-0.0445959			12.7875	-0.0153025			-0.230742	-31.2762	80.2195
		-0.0805711	-0.0446566			12.8509	-0.0219023			-0.30966	-29.5371	75.6256
		-0.0824147	-0.0447289			12.9107	-0.0283071			-0.383242	-27.9133	71.3078
		-0.084278	-0.0448093			12.9672	-0.0345248			-0.446278	-26.3998	67.248
		-0.086125	-0.0448963			13.0204	-0.0405612			-0.494287	-24.9909	63.4271
		-0.0879228	-0.044992			13.0707	-0.0464177			-0.525396	-23.68	59.8288
		-0.0896406	-0.0451007			13.1181	-0.0520919			-0.540308	-22.4603	56.4402
		-0.091249	-0.0452261			13.1629	-0.0575827			-0.540371	-21.326	53.2508
		-0.0927228	-0.0453691			13.2052	-0.0628929			-0.526604	-20.2727	50.2518
		-0.0940409	-0.04553			13.2451	-0.0680255			-0.499698	-19.2983	47.4324
		-0.0951855	-0.0457109			13.2827	-0.0729814			-0.460028	-18.4035	44.7777
		-0.0961402	-0.0459169			13.3183	-0.0777614			-0.408622	-17.5915	42.2736
		-0.0968922	-0.0461549			13.3519	-0.0823676			-0.349108	-16.8659	39.9097
		-0.0974319	-0.0464303			13.3836	-0.0868042			-0.286783	-16.2278	37.6778
		-0.0977529	-0.0467456			13.4135	-0.0910781			-0.224813	-15.6758	35.5689
		-0.0978518	-0.0471015			13.4417	-0.0951966			-0.163311	-15.2072	33.574
		-0.0977273	-0.0474999			13.4683	-0.0991658			-0.101292	-14.8199	31.6853
		-0.0973819	-0.0479445			13.4934	-0.102992			-0.0376705	-14.5133	29.8971
		-0.0968234	-0.0484408			13.5171	-0.106685			0.0286993	-14.2862	28.2066
		-0.0960643	-0.0489956			13.5395	-0.110255			0.0989865	-14.1352	26.6115
		-0.0951176	-0.0496166			13.5606	-0.113709			0.173382	-14.0527	25.1088
		-0.0939927	-0.0503123			13.5805	-0.117054			0.249137	-14.0286	23.6941
		-0.0926958	-0.0510918			13.5993	-0.120295			0.321478	-14.0533	22.3633
		-0.0912303	-0.0519636			13.6171	-0.123432			0.387399	-14.1193	21.1118
		-0.0895965	-0.0529359			13.6338	-0.12647			0.446574	-14.2202	19.9329
		-0.0877897	-0.0540159			13.6496	-0.129409			0.499401	-14.3502	18.8165
		-0.0857995	-0.0552087			13.6644	-0.132252			0.546006	-14.5018	17.7527
		-0.0836124	-0.0565174			13.6784	-0.134996			0.586211	-14.6613	16.7373
		-0.0812154	-0.0579418			13.6916	-0.137644			0.619504	-14.8101	15.7716
		-0.0785942	-0.0594776			13.704	-0.140198			0.645015	-14.9273	14.8559
		-0.0757299	-0.0611161			13.7156	-0.142671			0.661497	-14.9895	13.9878
		-0.0725998	-0.0628426			13.7266	-0.145074			0.667308	-14.969	13.1654
		-0.0691808	-0.0646366			13.7369	-0.14742			0.660408	-14.8339	12.3874
		-0.0654528	-0.0664747			13.7465	-0.149718			0.639304	-14.5488	11.6507
		-0.061399	-0.0683352			13.7555	-0.151982			0.604983	-14.0728	10.9498
		-0.0570064	-0.0702007			13.764	-0.154224			0.559962	-13.3585	10.2821
		-0.0522646	-0.072058			13.772	-0.156453			0.50447	-12.3535	9.64756
		-0.0471676	-0.073897			13.7794	-0.158679			0.43552	-11.0031	9.04565
		-0.0417171	-0.0757085			13.7863	-0.160906			0.349818	-9.24896	8.47473
		-0.0359256	-0.0774804			13.7928	-0.163134			0.246687	-7.02707	7.93334
		-0.0298191	-0.0791944			13.7988	-0.165356			0.128114	-4.26788	7.41959
		-0.0234407	-0.0808271			13.8044	-0.167564			-0.00213779	-0.897712	6.93154
		-0.0168504	-0.0823515			13.8097	-0.169748			-0.138465		6.46936
		-0.0101281	-0.0837373			13.8146	-0.171905			-0.27526		6.03571
		-0.0033786	-0.0849499			13.8192	-0.174033			-0.408748		5.63307
		0.00326172	-0.0859494			13.8236	-0.176135			-0.535947		5.26216
		0.00962301	-0.0866901			13.8277	-0.17821			-0.653623		4.92307
		0.0154998	-0.0871195			13.8315	-0.180261			-0.759179		4.61557
		0.0206461	-0.0871785			13.8352	-0.182293			-0.851535		4.33733
		0.0247721	-0.0868005			13.8386	-0.184312			-0.929151		4.08414
		0.0275418	-0.0859117			13.8419	-0.186325			-0.989009		3.85297
		0.0285688	-0.0844316			13.8451	-0.188333			-1.02945		3.64401
		0.0274127	-0.0822729			13.8481	-0.190337			-1.05107		3.45797
		0.0235809	-0.079343			13.851	-0.192339			-1.05483		3.29236
		0.0165306	-0.0755454			13.8538	-0.194343			-1.04104		3.1435
		0.00567132	-0.070781			13.8565	-0.19635			-1.0103		3.01051
		-0.00963145	-0.0649509			13.8591	-0.198363			-0.96549		2.89438
		-0.0300479	-0.0579583			13.8616	-0.200386			-0.910776		2.79427
		-0.0562772	-0.0497092			13.8641	-0.202421			-0.848777		2.70564
		-0.0890429	-0.0401146			13.8665	-0.204475			-0.782515		2.62317
		-0.129088	-0.0290971			13.8688	-0.206551			-0.718327		2.54469
		-0.177167	-0.0165953			13.8711	-0.208647			-0.662071		2.47025
		-0.234041	-0.00256503			13.8733	-0.210762			-0.615324		2.3993
		-0.30046	0.0130206			13.8754	-0.212887			-0.578295		2.32976
		-0.377155	0.0301702			13.8774	-0.215011			-0.552732		2.2581
		-0.464829	0.0488734			13.8793	-0.217124			-0.54098		2.1803
		-0.564142	0.0691006			13.8811	-0.219213			-0.545045		2.09479
		-0.675695	0.0908032			13.8829	-0.221268			-0.566593		2.00444
		-0.800015	0.113915			13.8846	-0.22328			-0.605991		1.91465
		-0.937546	0.138354			13.8862	-0.225243			-0.660377		1.83056
		-1.08864	0.16403			13.8878	-0.227154			-0.723634		1.75612
		-1.25355	0.190844			13.8894	-0.229007			-0.788279		1.69418
		-1.43242	0.218688			13.891	-0.230804			-0.846383		1.64649
		-1.62529	0.247442			13.8926	-0.232545			-0.890495		1.61374
		-1.83209	0.276975			13.8942	-0.234234			-0.916485		1.59564
		-2.05265	0.307145			13.8958	-0.235871			-0.925436		1.59088
		-2.28667	0.337796			13.8975	-0.237455			-0.920753		1.59717
		-2.53376	0.368762			13.8992	-0.238985			-0.903356		1.61125
		-2.79338	0.399876			13.9008	-0.240459			-0.871687		1.62887
		-3.06491	0.43097			13.9025	-0.241882			-0.825556		1.64576
		-3.34759	0.461877			13.9042	-0.243261			-0.767121		1.65949
		-3.64058	0.49244			13.9059	-0.244609			-0.698994		1.66955
		-3.94292	0.522509			13.9076	-0.245943			-0.623319		1.6763
		-4.25359	0.551944			13.9093	-0.247278			-0.541815		1.68196
		-4.57147	0.580617			13.911	-0.248627			-0.45582		1.68964
		-4.89542	0.608411			13.9127	-0.250002			-0.366339		1.69949
		-5.22425	0.635226			13.9144	-0.251412			-0.2741		1.70872
		-5.55673	0.660973							-0.179607		1.7154
		-5.89164	0.68558							-0.0831943		1.71945
		-6.22777	0.708993							0.0149108		1.72068
		-6.56393	0.731172							0.114533		1.71784
		-6.89893	0.75209							0.215486
		-7.23167	0.771737							0.317516
		-7.56108	0.790112							0.420232
		-7.88616	0.807235							0.523052
		-8.20597	0.823139							0.625134
		-8.51965	0.83787							0.725315
		-8.82644	0.851479							0.822049
		-9.12563	0.864022							0.913347
		-9.41665	0.875558							0.996717
		-9.699	0.886146							1.07007
		-9.97228	0.895848							1.13357
		-10.2362	0.904721							1.18867
		-10.4905	0.912824							1.23516
		-10.735	0.920208							1.27209
		-10.9696	0.926926							1.29874
		-11.1945	0.933026							1.31168
		-11.4095	0.938561							1.30475
		-11.6148	0.943585							1.2739
		-11.8106	0.948149							1.22003
		-11.997	0.952304							1.14709
		-12.1743	0.956094							1.05927
		-12.3427	0.959556							0.960034
		-12.5025	0.962724							0.852214
		-12.6539	0.965627							0.738053
		-12.7973	0.968283							0.619273
		-12.933	0.970706							0.497142
		-13.0612	0.972898							0.372553
		-13.1825	0.974864							0.24609
		-13.2969	0.976606							0.118113
		-13.4049	0.978128							-0.011171
		-13.5069	0.979437							-0.141627
		-13.603	0.980543							-0.273111
		-13.6936	0.981458							-0.404436
		-13.779	0.982193							-0.531366
		-13.8596	0.982756							-0.647503
		-13.9354	0.983159							-0.748043
		-14.0069	0.983419							-0.830668
		-14.0743	0.983553							-0.893563
		-14.1378	0.98358							-0.934411
		-14.1976	0.983522							-0.950353
		-14.2539	0.9834							-0.937964
		-14.3071	0.983234							-0.894203
		-14.3571	0.983044							-0.8193
		-14.4043	0.982851							-0.7187
		-14.4488	0.98267							-0.600229
		-14.4907	0.982511							-0.469362
		-14.5302	0.98238							-0.328328
		-14.5675	0.982277							-0.178117
		-14.6026	0.9822							-0.0204745
		-14.6357	0.982138							0.140081
		-14.667	0.982082							0.297124
		-14.6965	0.982018							0.447025
		-14.7245	0.981935							0.590764
		-14.7509	0.981828							0.730014
		-14.7758	0.981696							0.864163
		-14.7995	0.981546							0.991198
		-14.822	0.981383							1.10857
		-14.8433	0.98121							1.21314
		-14.8636	0.981032							1.30204
		-14.8829	0.980853							1.37453
		-14.9013	0.98068							1.43197
		-14.9189	0.980514							1.47584
		-14.9357	0.980355							1.50673
		-14.952	0.980198							1.52435
		-14.9676	0.980036							1.52746
		-14.9829	0.979858							1.51392
		-14.9977	0.979655							1.48063
		-15.0122	0.97942							1.4236
		-15.0265	0.979148							1.33886
		-15.0406	0.978835							1.22543
		-15.0547	0.978482							1.08727
		-15.0687	0.978091							0.93144
		-15.0827	0.977661							0.765282
		-15.0969	0.97719							0.595578
		-15.1111	0.976675							0.428638
		-15.1254	0.976111							0.270408
		-15.1399	0.975492							0.126569
		-15.1546	0.97481							0.00262731
		-15.1694	0.974059							-0.0959903
		-15.1843	0.973231							-0.163869
		-15.1993	0.97232							-0.196501
		-15.2143	0.971319							-0.193128
		-15.2291	0.970224							-0.157677
		-15.2437	0.969034							-0.0939639
		-15.2577	0.967748							-0.00188286
		-15.2711	0.966371							0.118722
		-15.2835	0.964905							0.263204
		-15.2945	0.963348							0.422999
		-15.3037	0.961689							0.588417
		-15.3107	0.959911							0.749509
		-15.315	0.957991							0.896923
		-15.3159	0.955909							1.02469
		-15.3127	0.953641							1.13204
		-15.3048	0.951162							1.22144
										1.29561
										1.35652
										1.40536
										1.44248
										1.4674
										1.47871
										1.47415
										1.45149
										1.41048
										1.35191
										1.27475
										1.1781
										1.06509
										0.940988
										0.808515
										0.667887
										0.520749
										0.371214
										0.223074
										0.0770191
										-0.0683184
										-0.212435
										-0.351909
										-0.48223
										-0.598674
										-0.696227
										-0.77047
										-0.820402
										-0.849351
										-0.861108
										-0.857988
										-0.84274
										-0.817593
										-0.7833
										-0.741076
										-0.691655
										-0.634363
										-0.570019
										-0.501932
										-0.434023
										-0.369905
										-0.311964
										-0.259477
										-0.209613
										-0.161299
										-0.116209
										-0.076875
										-0.0457583
										-0.0252691
										-0.0177866
										-0.0247113
										-0.0445512
										-0.0729178
										-0.104434
										-0.134634
										-0.161869
										-0.187284
										-0.211924
										-0.233844
										-0.24905
										-0.255326
										-0.253183
										-0.243935
										-0.228746
										-0.20863
										-0.184461
										-0.15699
										-0.126852
										-0.0945885
										-0.0606629
										-0.0254814
										0.0105866
										0.0471872
										0.0839597
										0.120515
										0.156411
										0.191133
										0.224071
										0.254498
										0.28155
										0.304206
										0.321277
										0.331388
										0.332966
										0.32424
										0.303239
										0.267792
										0.215552
										0.144968
										0.0581995
										-0.037882
										-0.135479
										-0.228689
										-0.313444
										-0.388418
										-0.454972
										-0.515189
										-0.570877
										-0.623527
										-0.67428
										-0.723899
										-0.772729
										-0.819713
										-0.860445
										-0.888097
										-0.897236
										-0.884768
										-0.848012
										-0.783751
										-0.689219
										-0.56501
										-0.41706
										-0.254804
										-0.0883815
										0.0731805
										0.223789
										0.360185
										0.480897
										0.587113
										0.682608
										0.771759
										0.857567
										0.939682
										1.01531
										1.08301
										1.14358
										1.19812
										1.24705
										1.29002
										1.32595
										1.35296
										1.36834
										1.36858
										1.35028
										1.31304
										1.26141
										1.20198
										1.13869
										1.0728
										1.00584
										0.938668
										0.870591
										0.80224
										0.736593
										0.677094
										0.625775
										0.58137
										0.540312
										0.500593
										0.462748
										0.427965
										0.397149
										0.370938
										0.349726
										0.333677
										0.322741
										0.316659
										0.314974
										0.317032
										0.321987
										0.328794
										0.337172
										0.349513
										0.369919
										0.400359
										0.439692
										0.485571
										0.535376
										0.586188
										0.634761
										0.677487
										0.710372
										0.729009
										0.729517
										0.710451
										0.672803
										0.619052
										0.554145
										0.484572
										0.414565
										0.346141
										0.282023
										0.223758
										0.168883
										0.114798
										0.0626323
										0.0134476
										-0.0355722
										-0.08821
										-0.146308
										-0.209733
										-0.275385
										-0.338116
										-0.395485
										-0.449644
										-0.50346
										-0.557605
										-0.611487
										-0.665125
										-0.720087
										-0.776568
										-0.829528
										-0.870575
										-0.893685
										-0.898063
										-0.886207
										-0.861026
										-0.824892
										-0.779649
										-0.726639
										-0.666728
										-0.600337
										-0.527481
										-0.447807
										-0.360643
										-0.265041
										-0.160795
										-0.0504161
										0.0617622
										0.173357
										0.283863
										0.390755
										0.489412
										0.575938
										0.646138
										0.694511
										0.717083
										0.713299
										0.686008
										0.639547
										0.575918
										0.493861
										0.390806
										0.26389
										0.110013
										-0.0731162
										-0.284971
										-0.523053
										-0.78564
										-1.07068
										-1.37468
										-1.69539
										-2.03259
										-2.38599
										-2.75403
										-3.13368
										-3.52023
										-3.90704
										-4.28625
										-4.65146
										-4.99941
										-5.32779
										-5.63221
										-5.90598
										-6.14278
										-6.33941
										-6.49657
										-6.6178
										-6.7065
										-6.76297
										-6.78439
										-6.76854
										-6.7187
										-6.64356
										-6.55249
										-6.45176
										-6.34457
										-6.23304
										-6.11829
										-5.99951
										-5.87502
										-5.7433
										-5.60403
										-5.4591
										-5.31081
										-5.16004
										-5.00726
										-4.85267
										-4.69532
										-4.53415
										-4.36809
										-4.19522
										-4.01478
										-3.82916
										-3.64217
										-3.45619
										-3.27139
										-3.0858
										-2.89642
										-2.70217
										-2.50598
										-2.31291
										-2.1275
										-1.95282
										-1.79065
										-1.64157
										-1.50505
										-1.38051
										-1.26932
										-1.17391
										-1.09403
										-1.02579
										-0.96371
										-0.902599
										-0.840533
										-0.779822
										-0.72322
										-0.672041
										-0.628116
										-0.591898
										-0.559617
										-0.52714
										-0.493824
										-0.459666
										-0.423397
										-0.385387
										-0.348622
										-0.316813
										-0.293453
										-0.281838
										-0.284123
										-0.298449
										-0.317981
										-0.334742
										-0.342481
										-0.336658
										-0.315407
										-0.279537
										-0.230627
										-0.170087
										-0.0991922
										-0.019113
										0.0690362
										0.164151
										0.265081
										0.370577
										0.47922
										0.589369
										0.699083
										0.806061
										0.907577
										1.00041
										1.08077
										1.14429
										1.18592
										1.20087
										1.18748
										1.14816
										1.08554
										1.0006
										0.894639
										0.768322
										0.620825
										0.452774
										0.267299
										0.0682163
										-0.140819
										-0.35619
										-0.574191
										-0.790898
										-1.00203
										-1.20283
										-1.38793
										-1.55122
										-1.68574
										-1.78457
										-1.84357
										-1.86331
										-1.84703
										-1.79784
										-1.7177
										-1.60845
										-1.47375
										-1.3182
										-1.14455
										-0.954744
										-0.751943
										-0.539689
										-0.321063
										-0.0988162
										0.124494
										0.345412
										0.55849
										0.759027
										0.946782
										1.12488
										1.29685
										1.46549
										1.63381
										1.80677
										1.99024
										2.18708
										2.39699
										2.62121
										2.86429
										3.13013
										3.41896
										3.72809
										4.05371
										4.39259
										4.74188
										5.097
										5.45044
										5.79157
										6.10643
										6.37845
										6.59022
										6.72235
										6.7495
										6.64032
										6.36129
										5.87677
										5.14632
										4.12599
										2.76969
										1.02699
										-1.15602

## Sheet: Fig.S2c
	MA			MK			ML			MC
	intact (ms)	scramble (ms)		intact (ms)	scramble (ms)		intact (ms)	scramble (ms)		intact (ms)	scramble (ms)
mean	0.534783	0.285703		0.003009	0.00105362		0.0710993	0.0440486		0.00131774	0.00239268
errorbar	0.0868308	0.0486558		0.00809872	0.00320511		0.0623045	0.0369017		0.00402829	0.00498474
rowdata	0.423423	0.234234		0.0163934	0.00813008		0.0693069	0.11		0	0
	0.462069	0.315068		0	0		0.0247934	0.0327869		0	0.00694444
	0.4	0.298507		0	0		0.015625	0.00793651		0	0
	0.338983	0.372881		0	0		0.0188679	0.0285714		0	0
	0.487342	0.318471		0	0		0.00714286	0.00719425		0	0
	0.537313	0.285714		0	0		0.030303	0.0229008		0	0
	0.529412	0.254902		0	0		0.0135135	0.027027		0	0
	0.55	0.280992		0	0		0.0181818	0.101852		0	0
	0.412698	0.28		0	0		0.214286	0.0707965		0	0
	0.58427	0.3		0	0		0.0444444	0.0674157		0	0
	0.576471	0.255814		0	0		0.0535714	0.0267857		0	0
	0.504505	0.267857		0	0		0.0344828	0.0574713		0	0
	0.333333	0.207207		0	0		0.05	0.029703		0	0.00833333
	0.479452	0.310345		0.0220588	0		0.0163934	0.0655738		0	0.00694444
	0.419118	0.242647		0	0		0.0234375	0.00793651		0	0.0151515
	0.487395	0.283333		0	0		0.00952381	0		0	0.0172414
	0.471338	0.261147		0	0		0.057554	0		0	0
	0.402985	0.149254		0	0.00546448		0.037594	0.0522388		0	0
	0.5	0.264706		0	0		0.0266667	0		0	0
	0.516667	0.275		0	0		0.0818182	0.100917		0	0
	0.488	0.256		0	0		0.0973451	0.114035		0	0
	0.6	0.348315		0	0		0.0666667	0.0224719		0	0
	0.523256	0.244186		0	0		0.027027	0.0535714		0	0
	0.526786	0.276786		0	0		0.0454545	0.0813954		0	0
	0.288288	0.236364		0.0330578	0		0.141414	0.1		0.00833333	0
	0.455172	0.305556		0.00735294	0.00729927		0.0487805	0.0245902		0	0
	0.477612	0.281481		0	0		0.023622	0.0238095		0	0
	0.533898	0.235294		0	0		0.0188679	0		0	0
	0.594937	0.299363		0.00636943	0		0.0285714	0.0357143		0	0
	0.537313	0.186567		0.00540541	0		0.030303	0.0150376		0	0.00662252
	0.435644	0.316832		0	0		0.0131579	0.0135135		0	0
	0.545455	0.241667		0	0.00943396		0.100917	0.0560748		0	0
	0.548387	0.232		0	0		0.131579	0.157895		0	0
	0.588889	0.258427		0	0		0.0666667	0.0337079		0	0
	0.482353	0.27907		0	0		0.0625	0		0	0
	0.423423	0.267857		0	0		0.0348837	0.0344828		0	0
	0.504505	0.216216		0.0487805	0.00819672		0.25	0.1		0	0.0252101
	0.568493	0.307692		0.0145985	0.00735294		0.130081	0.0327869		0	0.00694444
	0.597015	0.38806		0	0		0.0387597	0.015873		0.00757576	0
	0.554622	0.325		0	0		0.0471698	0		0	0
	0.594937	0.386076		0	0		0.0714286	0.0285714		0	0
	0.679104	0.283582		0	0		0.0601504	0.030303		0	0.00657895
	0.554455	0.277228		0	0		0.0405405	0		0	0
	0.583333	0.283333		0	0		0.0642202	0.0733945		0.00819672	0
	0.571429	0.241935		0	0		0.289474	0.157895		0	0
	0.550562	0.311111		0	0		0.111111	0.0224719		0	0
	0.604651	0.255814		0	0		0.0714286	0.0267857		0	0.00729927
	0.544643	0.3125		0	0		0.0697674	0		0	0
	0.495495	0.225225		0.0163934	0		0.222222	0.0707071		0.0252101	0
	0.541096	0.393103		0.00729927	0.0145985		0.0983607	0.0491803		0	0
	0.602941	0.286765		0	0		0.0390625	0.00787402		0	0
	0.70339	0.226891		0	0		0.0754717	0.00943396		0	0.00862069
	0.696202	0.318471		0	0		0.0647482	0.05		0.00649351	0
	0.639098	0.253731		0	0		0.11194	0.0300752		0	0
	0.666667	0.346535		0.0153846	0.0153846		0	0.0533333		0.00819672	0
	0.633333	0.247934		0	0		0.127273	0.0555556		0	0
	0.65873	0.272		0	0		0.236842	0.131579		0	0.00813008
	0.633333	0.325843		0	0		0.155556	0.0674157		0	0
	0.623529	0.372093		0	0		0.108108	0.0625		0	0
	0.603604	0.333333		0	0		0.104651	0.045977		0	0
	0.446429	0.263636		0.00826446	0		0.1	0.05		0	0
	0.547945	0.303448		0.00735294	0		0.057377	0.0163934		0.013986	0
	0.404412	0.37037		0.00793651	0		0.00787402	0.015625		0	0.0151515
	0.529412	0.381356		0	0		0.0190476	0.0188679		0.00862069	0.00862069
	0.601266	0.248408		0	0		0.05	0.0143885		0	0.00649351
	0.586466	0.268657		0	0		0.0530303	0.0378788		0	0.00662252
	0.574257	0.352941		0	0		0	0.0266667		0.00826446	0
	0.520661	0.338843		0	0		0.0642202	0.0648148		0	0
	0.528	0.268293		0	0		0.210526	0.0614035		0	0
	0.677778	0.269663		0	0		0.0795455	0.0786517		0	0.0113636
	0.662791	0.290698		0	0		0.0357143	0.0357143		0	0
	0.553571	0.3		0	0		0.0681818	0.045977		0	0

## Sheet: Fig.S2d
scatter point	in-group	out-group		fitted curve	in-group	out-group
	0.122413	0.247117			0	0.016636
	0.155242	0.217763			0.0004004	0.0171193
	0.158031	0.186391			0.000800801	0.0176026
	0.156256	0.284726			0.0012012	0.0180859
	0.224878	0.31315			0.0016016	0.0185692
	0.285359	0.366233			0.002002	0.0190524
	0.209539	0.272892			0.0024024	0.0195357
	0.271488	0.289073			0.0028028	0.020019
	0.227028	0.32531			0.0032032	0.0205023
	0.288806	0.318352			0.0036036	0.0209856
	0.26767	0.324122			0.004004	0.0214688
	0.214071	0.251995			0.0044044	0.0219521
	0.0137737	0.0217472			0.0048048	0.0224354
	0.00737083	0.00243309			0.00520521	0.0229187
	0	0.0026455			0.00560561	0.023402
	0	0			0.00600601	0.0238853
	0.00212314	0			0.00640641	0.0243685
	-1.96918e-05	0			0.00680681	0.0248518
	0	0			0.00720721	0.0253351
	-0.00314465	0			0.00760761	0.0258184
	0	0			0.00800801	0.0263017
	0	0			0.00840841	0.0267849
	0	0			0.00880881	0.0272682
	0	0			0.00920921	0.0277515
	0.00700603	0.117172			0.00960961	0.0282348
	-0.0109945	0.0624861			0.01001	0.0287181
	0.00766734	0.0154414			0.0104104	0.0292014
	0.00622941	0.0377958			0.0108108	0.0296846
	0.0167866	0.0310723			0.0112112	0.0301679
	0.00267429	0.042288			0.0116116	0.0306512
	0.00426584	-0.0131532			0.012012	0.0311345
	-0.0193089	0.0206494			0.0124124	0.0316178
	0.0334945	0.128655			0.0128128	0.032101
	0.0180608	0.0592243			0.0132132	0.0325843
	0.0209138	0.0300837			0.0136136	0.0330676
	-0.0195095	0.0502155			0.014014	0.0335509
	0	0			0.0144144	0.0340342
	-0.00462963	0.00234719			0.0148148	0.0345175
	-0.00505051	-0.00252525			0.0152152	0.0350007
	-0.00574713	-0.00287356			0.0156156	0.035484
	0	0			0.016016	0.0359673
	-0.00220751	-0.00440049			0.0164164	0.0364506
	0	0.00548706			0.0168168	0.0369339
	0	0.00273224			0.0172172	0.0374171
	0	-0.00271003			0.0176176	0.0379004
	0	-0.00378788			0.018018	0.0383837
	0	-0.00243309			0.0184184	0.038867
	0	0			0.0188188	0.0393503
					0.0192192	0.0398336
					0.0196196	0.0403168
					0.02002	0.0408001
					0.0204204	0.0412834
					0.0208208	0.0417667
					0.0212212	0.04225
					0.0216216	0.0427332
					0.022022	0.0432165
					0.0224224	0.0436998
					0.0228228	0.0441831
					0.0232232	0.0446664
					0.0236236	0.0451497
					0.024024	0.0456329
					0.0244244	0.0461162
					0.0248248	0.0465995
					0.0252252	0.0470828
					0.0256256	0.0475661
					0.026026	0.0480493
					0.0264264	0.0485326
					0.0268268	0.0490159
					0.0272272	0.0494992
					0.0276276	0.0499825
					0.028028	0.0504658
					0.0284284	0.050949
					0.0288288	0.0514323
					0.0292292	0.0519156
					0.0296296	0.0523989
					0.03003	0.0528822
					0.0304304	0.0533654
					0.0308308	0.0538487
					0.0312312	0.054332
					0.0316316	0.0548153
					0.032032	0.0552986
					0.0324324	0.0557819
					0.0328328	0.0562651
					0.0332332	0.0567484
					0.0336336	0.0572317
					0.034034	0.057715
					0.0344344	0.0581983
					0.0348348	0.0586815
					0.0352352	0.0591648
					0.0356356	0.0596481
					0.036036	0.0601314
					0.0364364	0.0606147
					0.0368368	0.061098
					0.0372372	0.0615812
					0.0376376	0.0620645
					0.038038	0.0625478
					0.0384384	0.0630311
					0.0388388	0.0635144
					0.0392392	0.0639977
					0.0396396	0.0644809
					0.04004	0.0649642
					0.0404404	0.0654475
					0.0408408	0.0659308
					0.0412412	0.0664141
					0.0416416	0.0668973
					0.042042	0.0673806
					0.0424424	0.0678639
					0.0428428	0.0683472
					0.0432432	0.0688305
					0.0436436	0.0693137
					0.044044	0.069797
					0.0444444	0.0702803
					0.0448448	0.0707636
					0.0452452	0.0712469
					0.0456456	0.0717302
					0.046046	0.0722134
					0.0464464	0.0726967
					0.0468468	0.07318
					0.0472472	0.0736633
					0.0476476	0.0741466
					0.0480481	0.0746298
					0.0484484	0.0751131
					0.0488488	0.0755964
					0.0492493	0.0760797
					0.0496496	0.076563
					0.05005	0.0770463
					0.0504505	0.0775295
					0.0508509	0.0780128
					0.0512512	0.0784961
					0.0516517	0.0789794
					0.0520521	0.0794627
					0.0524525	0.079946
					0.0528529	0.0804292
					0.0532533	0.0809125
					0.0536537	0.0813958
					0.0540541	0.0818791
					0.0544545	0.0823624
					0.0548549	0.0828456
					0.0552553	0.0833289
					0.0556557	0.0838122
					0.0560561	0.0842955
					0.0564565	0.0847788
					0.0568569	0.0852621
					0.0572573	0.0857453
					0.0576577	0.0862286
					0.0580581	0.0867119
					0.0584585	0.0871952
					0.0588589	0.0876785
					0.0592593	0.0881617
					0.0596597	0.088645
					0.0600601	0.0891283
					0.0604605	0.0896116
					0.0608609	0.0900949
					0.0612613	0.0905782
					0.0616617	0.0910614
					0.0620621	0.0915447
					0.0624625	0.092028
					0.0628629	0.0925113
					0.0632633	0.0929946
					0.0636637	0.0934778
					0.0640641	0.0939611
					0.0644645	0.0944444
					0.0648649	0.0949277
					0.0652653	0.095411
					0.0656657	0.0958943
					0.0660661	0.0963775
					0.0664665	0.0968608
					0.0668669	0.0973441
					0.0672673	0.0978274
					0.0676677	0.0983107
					0.0680681	0.0987939
					0.0684685	0.0992772
					0.0688689	0.0997605
					0.0692693	0.100244
					0.0696697	0.100727
					0.0700701	0.10121
					0.0704705	0.101694
					0.0708709	0.102177
					0.0712713	0.10266
					0.0716717	0.103143
					0.0720721	0.103627
					0.0724725	0.10411
					0.0728729	0.104593
					0.0732733	0.105077
					0.0736737	0.10556
					0.0740741	0.106043
					0.0744745	0.106526
					0.0748749	0.10701
					0.0752753	0.107493
					0.0756757	0.107976
					0.0760761	0.10846
					0.0764765	0.108943
					0.0768769	0.109426
					0.0772773	0.109909
					0.0776777	0.110393
					0.0780781	0.110876
					0.0784785	0.111359
					0.0788789	0.111843
					0.0792793	0.112326
					0.0796797	0.112809
					0.0800801	0.113292
					0.0804805	0.113776
					0.0808809	0.114259
					0.0812813	0.114742
					0.0816817	0.115226
					0.0820821	0.115709
					0.0824825	0.116192
					0.0828829	0.116675
					0.0832833	0.117159
					0.0836837	0.117642
					0.0840841	0.118125
					0.0844845	0.118609
					0.0848849	0.119092
					0.0852853	0.119575
					0.0856857	0.120058
					0.0860861	0.120542
					0.0864865	0.121025
					0.0868869	0.121508
					0.0872873	0.121991
					0.0876877	0.122475
					0.0880881	0.122958
					0.0884885	0.123441
					0.0888889	0.123925
					0.0892893	0.124408
					0.0896897	0.124891
					0.0900901	0.125374
					0.0904905	0.125858
					0.0908909	0.126341
					0.0912913	0.126824
					0.0916917	0.127308
					0.0920921	0.127791
					0.0924925	0.128274
					0.0928929	0.128757
					0.0932933	0.129241
					0.0936937	0.129724
					0.0940941	0.130207
					0.0944945	0.130691
					0.0948949	0.131174
					0.0952953	0.131657
					0.0956957	0.13214
					0.0960961	0.132624
					0.0964965	0.133107
					0.0968969	0.13359
					0.0972973	0.134074
					0.0976977	0.134557
					0.0980981	0.13504
					0.0984985	0.135523
					0.0988989	0.136007
					0.0992993	0.13649
					0.0996997	0.136973
					0.1001	0.137456
					0.100501	0.13794
					0.100901	0.138423
					0.101301	0.138906
					0.101702	0.13939
					0.102102	0.139873
					0.102502	0.140356
					0.102903	0.140839
					0.103303	0.141323
					0.103704	0.141806
					0.104104	0.142289
					0.104505	0.142773
					0.104905	0.143256
					0.105305	0.143739
					0.105706	0.144222
					0.106106	0.144706
					0.106507	0.145189
					0.106907	0.145672
					0.107307	0.146156
					0.107708	0.146639
					0.108108	0.147122
					0.108509	0.147605
					0.108909	0.148089
					0.109309	0.148572
					0.10971	0.149055
					0.11011	0.149539
					0.110511	0.150022
					0.110911	0.150505
					0.111311	0.150988
					0.111712	0.151472
					0.112112	0.151955
					0.112513	0.152438
					0.112913	0.152922
					0.113313	0.153405
					0.113714	0.153888
					0.114114	0.154371
					0.114515	0.154855
					0.114915	0.155338
					0.115315	0.155821
					0.115716	0.156304
					0.116116	0.156788
					0.116517	0.157271
					0.116917	0.157754
					0.117317	0.158238
					0.117718	0.158721
					0.118118	0.159204
					0.118519	0.159687
					0.118919	0.160171
					0.119319	0.160654
					0.11972	0.161137
					0.12012	0.161621
					0.120521	0.162104
					0.120921	0.162587
					0.121321	0.16307
					0.121722	0.163554
					0.122122	0.164037
					0.122523	0.16452
					0.122923	0.165004
					0.123323	0.165487
					0.123724	0.16597
					0.124124	0.166453
					0.124525	0.166937
					0.124925	0.16742
					0.125325	0.167903
					0.125726	0.168387
					0.126126	0.16887
					0.126527	0.169353
					0.126927	0.169836
					0.127327	0.17032
					0.127728	0.170803
					0.128128	0.171286
					0.128529	0.171769
					0.128929	0.172253
					0.129329	0.172736
					0.12973	0.173219
					0.13013	0.173703
					0.130531	0.174186
					0.130931	0.174669
					0.131331	0.175152
					0.131732	0.175636
					0.132132	0.176119
					0.132533	0.176602
					0.132933	0.177086
					0.133333	0.177569
					0.133734	0.178052
					0.134134	0.178535
					0.134535	0.179019
					0.134935	0.179502
					0.135335	0.179985
					0.135736	0.180469
					0.136136	0.180952
					0.136537	0.181435
					0.136937	0.181918
					0.137337	0.182402
					0.137738	0.182885
					0.138138	0.183368
					0.138539	0.183852
					0.138939	0.184335
					0.139339	0.184818
					0.13974	0.185301
					0.14014	0.185785
					0.140541	0.186268
					0.140941	0.186751
					0.141341	0.187235
					0.141742	0.187718
					0.142142	0.188201
					0.142543	0.188684
					0.142943	0.189168
					0.143343	0.189651
					0.143744	0.190134
					0.144144	0.190617
					0.144545	0.191101
					0.144945	0.191584
					0.145345	0.192067
					0.145746	0.192551
					0.146146	0.193034
					0.146547	0.193517
					0.146947	0.194
					0.147347	0.194484
					0.147748	0.194967
					0.148148	0.19545
					0.148549	0.195934
					0.148949	0.196417
					0.149349	0.1969
					0.14975	0.197383
					0.15015	0.197867
					0.150551	0.19835
					0.150951	0.198833
					0.151351	0.199317
					0.151752	0.1998
					0.152152	0.200283
					0.152553	0.200766
					0.152953	0.20125
					0.153353	0.201733
					0.153754	0.202216
					0.154154	0.2027
					0.154555	0.203183
					0.154955	0.203666
					0.155355	0.204149
					0.155756	0.204633
					0.156156	0.205116
					0.156557	0.205599
					0.156957	0.206083
					0.157357	0.206566
					0.157758	0.207049
					0.158158	0.207532
					0.158559	0.208016
					0.158959	0.208499
					0.159359	0.208982
					0.15976	0.209465
					0.16016	0.209949
					0.160561	0.210432
					0.160961	0.210915
					0.161361	0.211399
					0.161762	0.211882
					0.162162	0.212365
					0.162563	0.212848
					0.162963	0.213332
					0.163363	0.213815
					0.163764	0.214298
					0.164164	0.214782
					0.164565	0.215265
					0.164965	0.215748
					0.165365	0.216231
					0.165766	0.216715
					0.166166	0.217198
					0.166567	0.217681
					0.166967	0.218165
					0.167367	0.218648
					0.167768	0.219131
					0.168168	0.219614
					0.168569	0.220098
					0.168969	0.220581
					0.169369	0.221064
					0.16977	0.221548
					0.17017	0.222031
					0.170571	0.222514
					0.170971	0.222997
					0.171371	0.223481
					0.171772	0.223964
					0.172172	0.224447
					0.172573	0.224931
					0.172973	0.225414
					0.173373	0.225897
					0.173774	0.22638
					0.174174	0.226864
					0.174575	0.227347
					0.174975	0.22783
					0.175375	0.228313
					0.175776	0.228797
					0.176176	0.22928
					0.176577	0.229763
					0.176977	0.230247
					0.177377	0.23073
					0.177778	0.231213
					0.178178	0.231696
					0.178579	0.23218
					0.178979	0.232663
					0.179379	0.233146
					0.17978	0.23363
					0.18018	0.234113
					0.180581	0.234596
					0.180981	0.235079
					0.181381	0.235563
					0.181782	0.236046
					0.182182	0.236529
					0.182583	0.237013
					0.182983	0.237496
					0.183383	0.237979
					0.183784	0.238462
					0.184184	0.238946
					0.184585	0.239429
					0.184985	0.239912
					0.185385	0.240396
					0.185786	0.240879
					0.186186	0.241362
					0.186587	0.241845
					0.186987	0.242329
					0.187387	0.242812
					0.187788	0.243295
					0.188188	0.243779
					0.188589	0.244262
					0.188989	0.244745
					0.189389	0.245228
					0.18979	0.245712
					0.19019	0.246195
					0.190591	0.246678
					0.190991	0.247161
					0.191391	0.247645
					0.191792	0.248128
					0.192192	0.248611
					0.192593	0.249095
					0.192993	0.249578
					0.193393	0.250061
					0.193794	0.250544
					0.194194	0.251028
					0.194595	0.251511
					0.194995	0.251994
					0.195395	0.252478
					0.195796	0.252961
					0.196196	0.253444
					0.196597	0.253927
					0.196997	0.254411
					0.197397	0.254894
					0.197798	0.255377
					0.198198	0.255861
					0.198599	0.256344
					0.198999	0.256827
					0.199399	0.25731
					0.1998	0.257794
					0.2002	0.258277
					0.200601	0.25876
					0.201001	0.259244
					0.201401	0.259727
					0.201802	0.26021
					0.202202	0.260693
					0.202603	0.261177
					0.203003	0.26166
					0.203403	0.262143
					0.203804	0.262626
					0.204204	0.26311
					0.204605	0.263593
					0.205005	0.264076
					0.205405	0.26456
					0.205806	0.265043
					0.206206	0.265526
					0.206607	0.266009
					0.207007	0.266493
					0.207407	0.266976
					0.207808	0.267459
					0.208208	0.267943
					0.208609	0.268426
					0.209009	0.268909
					0.209409	0.269392
					0.20981	0.269876
					0.21021	0.270359
					0.210611	0.270842
					0.211011	0.271326
					0.211411	0.271809
					0.211812	0.272292
					0.212212	0.272775
					0.212613	0.273259
					0.213013	0.273742
					0.213413	0.274225
					0.213814	0.274709
					0.214214	0.275192
					0.214615	0.275675
					0.215015	0.276158
					0.215415	0.276642
					0.215816	0.277125
					0.216216	0.277608
					0.216617	0.278092
					0.217017	0.278575
					0.217417	0.279058
					0.217818	0.279541
					0.218218	0.280025
					0.218619	0.280508
					0.219019	0.280991
					0.219419	0.281475
					0.21982	0.281958
					0.22022	0.282441
					0.220621	0.282924
					0.221021	0.283408
					0.221421	0.283891
					0.221822	0.284374
					0.222222	0.284857
					0.222623	0.285341
					0.223023	0.285824
					0.223423	0.286307
					0.223824	0.286791
					0.224224	0.287274
					0.224625	0.287757
					0.225025	0.28824
					0.225425	0.288724
					0.225826	0.289207
					0.226226	0.28969
					0.226627	0.290174
					0.227027	0.290657
					0.227427	0.29114
					0.227828	0.291623
					0.228228	0.292107
					0.228629	0.29259
					0.229029	0.293073
					0.229429	0.293557
					0.22983	0.29404
					0.23023	0.294523
					0.230631	0.295006
					0.231031	0.29549
					0.231431	0.295973
					0.231832	0.296456
					0.232232	0.29694
					0.232633	0.297423
					0.233033	0.297906
					0.233433	0.298389
					0.233834	0.298873
					0.234234	0.299356
					0.234635	0.299839
					0.235035	0.300322
					0.235435	0.300806
					0.235836	0.301289
					0.236236	0.301772
					0.236637	0.302256
					0.237037	0.302739
					0.237437	0.303222
					0.237838	0.303705
					0.238238	0.304189
					0.238639	0.304672
					0.239039	0.305155
					0.239439	0.305639
					0.23984	0.306122
					0.24024	0.306605
					0.240641	0.307088
					0.241041	0.307572
					0.241441	0.308055
					0.241842	0.308538
					0.242242	0.309022
					0.242643	0.309505
					0.243043	0.309988
					0.243443	0.310471
					0.243844	0.310955
					0.244244	0.311438
					0.244645	0.311921
					0.245045	0.312405
					0.245445	0.312888
					0.245846	0.313371
					0.246246	0.313854
					0.246647	0.314338
					0.247047	0.314821
					0.247447	0.315304
					0.247848	0.315787
					0.248248	0.316271
					0.248649	0.316754
					0.249049	0.317237
					0.249449	0.317721
					0.24985	0.318204
					0.25025	0.318687
					0.250651	0.31917
					0.251051	0.319654
					0.251451	0.320137
					0.251852	0.32062
					0.252252	0.321104
					0.252653	0.321587
					0.253053	0.32207
					0.253453	0.322553
					0.253854	0.323037
					0.254254	0.32352
					0.254655	0.324003
					0.255055	0.324487
					0.255455	0.32497
					0.255856	0.325453
					0.256256	0.325936
					0.256657	0.32642
					0.257057	0.326903
					0.257457	0.327386
					0.257858	0.32787
					0.258258	0.328353
					0.258659	0.328836
					0.259059	0.329319
					0.259459	0.329803
					0.25986	0.330286
					0.26026	0.330769
					0.260661	0.331253
					0.261061	0.331736
					0.261461	0.332219
					0.261862	0.332702
					0.262262	0.333186
					0.262663	0.333669
					0.263063	0.334152
					0.263463	0.334635
					0.263864	0.335119
					0.264264	0.335602
					0.264665	0.336085
					0.265065	0.336569
					0.265465	0.337052
					0.265866	0.337535
					0.266266	0.338018
					0.266667	0.338502
					0.267067	0.338985
					0.267467	0.339468
					0.267868	0.339952
					0.268268	0.340435
					0.268669	0.340918
					0.269069	0.341401
					0.269469	0.341885
					0.26987	0.342368
					0.27027	0.342851
					0.270671	0.343335
					0.271071	0.343818
					0.271471	0.344301
					0.271872	0.344784
					0.272272	0.345268
					0.272673	0.345751
					0.273073	0.346234
					0.273473	0.346718
					0.273874	0.347201
					0.274274	0.347684
					0.274675	0.348167
					0.275075	0.348651
					0.275475	0.349134
					0.275876	0.349617
					0.276276	0.350101
					0.276677	0.350584
					0.277077	0.351067
					0.277477	0.35155
					0.277878	0.352034
					0.278278	0.352517
					0.278679	0.353
					0.279079	0.353484
					0.279479	0.353967
					0.27988	0.35445
					0.28028	0.354933
					0.280681	0.355417
					0.281081	0.3559
					0.281481	0.356383
					0.281882	0.356866
					0.282282	0.35735
					0.282683	0.357833
					0.283083	0.358316
					0.283483	0.3588
					0.283884	0.359283
					0.284284	0.359766
					0.284685	0.360249
					0.285085	0.360733
					0.285485	0.361216
					0.285886	0.361699
					0.286286	0.362183
					0.286687	0.362666
					0.287087	0.363149
					0.287487	0.363632
					0.287888	0.364116
					0.288288	0.364599
					0.288689	0.365082
					0.289089	0.365566
					0.289489	0.366049
					0.28989	0.366532
					0.29029	0.367015
					0.290691	0.367499
					0.291091	0.367982
					0.291491	0.368465
					0.291892	0.368949
					0.292292	0.369432
					0.292693	0.369915
					0.293093	0.370398
					0.293493	0.370882
					0.293894	0.371365
					0.294294	0.371848
					0.294695	0.372331
					0.295095	0.372815
					0.295496	0.373298
					0.295896	0.373781
					0.296296	0.374265
					0.296697	0.374748
					0.297097	0.375231
					0.297498	0.375714
					0.297898	0.376198
					0.298298	0.376681
					0.298699	0.377164
					0.299099	0.377648
					0.299499	0.378131
					0.2999	0.378614
					0.3003	0.379097
					0.300701	0.379581
					0.301101	0.380064
					0.301501	0.380547
					0.301902	0.381031
					0.302302	0.381514
					0.302703	0.381997
					0.303103	0.38248
					0.303503	0.382964
					0.303904	0.383447
					0.304304	0.38393
					0.304705	0.384414
					0.305105	0.384897
					0.305505	0.38538
					0.305906	0.385863
					0.306306	0.386347
					0.306707	0.38683
					0.307107	0.387313
					0.307508	0.387797
					0.307908	0.38828
					0.308308	0.388763
					0.308709	0.389246
					0.309109	0.38973
					0.30951	0.390213
					0.30991	0.390696
					0.31031	0.391179
					0.310711	0.391663
					0.311111	0.392146
					0.311512	0.392629
					0.311912	0.393113
					0.312312	0.393596
					0.312713	0.394079
					0.313113	0.394562
					0.313514	0.395046
					0.313914	0.395529
					0.314314	0.396012
					0.314715	0.396496
					0.315115	0.396979
					0.315516	0.397462
					0.315916	0.397945
					0.316316	0.398429
					0.316717	0.398912
					0.317117	0.399395
					0.317518	0.399879
					0.317918	0.400362
					0.318318	0.400845
					0.318719	0.401328
					0.319119	0.401812
					0.31952	0.402295
					0.31992	0.402778
					0.32032	0.403261
					0.320721	0.403745
					0.321121	0.404228
					0.321522	0.404711
					0.321922	0.405195
					0.322322	0.405678
					0.322723	0.406161
					0.323123	0.406645
					0.323524	0.407128
					0.323924	0.407611
					0.324324	0.408094
					0.324725	0.408578
					0.325125	0.409061
					0.325526	0.409544
					0.325926	0.410027
					0.326326	0.410511
					0.326727	0.410994
					0.327127	0.411477
					0.327528	0.411961
					0.327928	0.412444
					0.328328	0.412927
					0.328729	0.41341
					0.329129	0.413894
					0.32953	0.414377
					0.32993	0.41486
					0.33033	0.415344
					0.330731	0.415827
					0.331131	0.41631
					0.331532	0.416793
					0.331932	0.417277
					0.332332	0.41776
					0.332733	0.418243
					0.333133	0.418727
					0.333534	0.41921
					0.333934	0.419693
					0.334334	0.420176
					0.334735	0.42066
					0.335135	0.421143
					0.335536	0.421626
					0.335936	0.42211
					0.336336	0.422593
					0.336737	0.423076
					0.337137	0.423559
					0.337538	0.424043
					0.337938	0.424526
					0.338338	0.425009
					0.338739	0.425492
					0.339139	0.425976
					0.33954	0.426459
					0.33994	0.426942
					0.34034	0.427426
					0.340741	0.427909
					0.341141	0.428392
					0.341542	0.428875
					0.341942	0.429359
					0.342342	0.429842
					0.342743	0.430325
					0.343143	0.430809
					0.343544	0.431292
					0.343944	0.431775
					0.344344	0.432258
					0.344745	0.432742
					0.345145	0.433225
					0.345546	0.433708
					0.345946	0.434192
					0.346346	0.434675
					0.346747	0.435158
					0.347147	0.435641
					0.347548	0.436125
					0.347948	0.436608
					0.348348	0.437091
					0.348749	0.437575
					0.349149	0.438058
					0.34955	0.438541
					0.34995	0.439024
					0.35035	0.439508
					0.350751	0.439991
					0.351151	0.440474
					0.351552	0.440958
					0.351952	0.441441
					0.352352	0.441924
					0.352753	0.442407
					0.353153	0.442891
					0.353554	0.443374
					0.353954	0.443857
					0.354354	0.444341
					0.354755	0.444824
					0.355155	0.445307
					0.355556	0.44579
					0.355956	0.446274
					0.356356	0.446757
					0.356757	0.44724
					0.357157	0.447723
					0.357558	0.448207
					0.357958	0.44869
					0.358358	0.449173
					0.358759	0.449657
					0.359159	0.45014
					0.35956	0.450623
					0.35996	0.451106
					0.36036	0.45159
					0.360761	0.452073
					0.361161	0.452556
					0.361562	0.45304
					0.361962	0.453523
					0.362362	0.454006
					0.362763	0.454489
					0.363163	0.454973
					0.363564	0.455456
					0.363964	0.455939
					0.364364	0.456423
					0.364765	0.456906
					0.365165	0.457389
					0.365566	0.457872
					0.365966	0.458356
					0.366366	0.458839
					0.366767	0.459322
					0.367167	0.459806
					0.367568	0.460289
					0.367968	0.460772
					0.368368	0.461255
					0.368769	0.461739
					0.369169	0.462222
					0.36957	0.462705
					0.36997	0.463188
					0.37037	0.463672
					0.370771	0.464155
					0.371171	0.464638
					0.371572	0.465122
					0.371972	0.465605
					0.372372	0.466088
					0.372773	0.466571
					0.373173	0.467055
					0.373574	0.467538
					0.373974	0.468021
					0.374374	0.468505
					0.374775	0.468988
					0.375175	0.469471
					0.375576	0.469954
					0.375976	0.470438
					0.376376	0.470921
					0.376777	0.471404
					0.377177	0.471888
					0.377578	0.472371
					0.377978	0.472854
					0.378378	0.473337
					0.378779	0.473821
					0.379179	0.474304
					0.37958	0.474787
					0.37998	0.475271
					0.38038	0.475754
					0.380781	0.476237
					0.381181	0.47672
					0.381582	0.477204
					0.381982	0.477687
					0.382382	0.47817
					0.382783	0.478654
					0.383183	0.479137
					0.383584	0.47962
					0.383984	0.480103
					0.384384	0.480587
					0.384785	0.48107
					0.385185	0.481553
					0.385586	0.482036
					0.385986	0.48252
					0.386386	0.483003
					0.386787	0.483486
					0.387187	0.48397
					0.387588	0.484453
					0.387988	0.484936
					0.388388	0.485419
					0.388789	0.485903
					0.389189	0.486386
					0.38959	0.486869
					0.38999	0.487353
					0.39039	0.487836
					0.390791	0.488319
					0.391191	0.488802
					0.391592	0.489286
					0.391992	0.489769
					0.392392	0.490252
					0.392793	0.490736
					0.393193	0.491219
					0.393594	0.491702
					0.393994	0.492185
					0.394394	0.492669
					0.394795	0.493152
					0.395195	0.493635
					0.395596	0.494119
					0.395996	0.494602
					0.396396	0.495085
					0.396797	0.495568
					0.397197	0.496052
					0.397598	0.496535
					0.397998	0.497018
					0.398398	0.497501
					0.398799	0.497985
					0.399199	0.498468
					0.3996	0.498951
					0.4	0.499435

## Sheet: Fig.S2e
		mean	errorbar		rowdata
MA	in-group	0.215065	0.0567893		0.122413	0.155242	0.158031	0.156256	0.224878	0.285359	0.209539	0.271488	0.227028	0.288806	0.26767	0.214071
	out-group	0.283094	0.0509435		0.247117	0.217763	0.186391	0.284726	0.31315	0.366233	0.272892	0.289073	0.32531	0.318352	0.324122	0.251995
		mean	errorbar		rowdata
MK	in-group	0.00167528	0.00452029		0.0137737	0.00737083	0	0	0.00212314	-1.96918e-05	0	-0.00314465	0	0	0	0
	out-group	0.00223548	0.00622233		0.0217472	0.00243309	0.0026455	0	0	0	0	0	0	0	0	0
		mean	errorbar		rowdata
ML	in-group	0.00560714	0.0160576		0.00700603	-0.0109945	0.00766734	0.00622941	0.0167866	0.00267429	0.00426584	-0.0193089	0.0334945	0.0180608	0.0209138	-0.0195095
	out-group	0.0484942	0.0403619		0.117172	0.0624861	0.0154414	0.0377958	0.0310723	0.042288	-0.0131532	0.0206494	0.128655	0.0592243	0.0300837	0.0502155
		mean	errorbar		rowdata
MC	in-group	-0.00146956	0.00231454		0	-0.00462963	-0.00505051	-0.00574713	0	-0.00220751	0	0	0	0	0	0
	out-group	-0.000680317	0.00300211		0	0.00234719	-0.00252525	-0.00287356	0	-0.00440049	0.00548706	0.00273224	-0.00271003	-0.00378788	-0.00243309	0

## Sheet: Fig.S2f
in-group					out-group
scatter point	social engagement index	differences of probability	errorbar		scatter point	social engagement index	differences of probability	errorbar
	-1.8	0.215065	0.0831561			-2.5	0.283094	0.0887899
	-0.64	0.00167528	0.00704133			-0.66	0.00223548	0.00761017
	0.84	0.00560714	0.0389033			0.8	0.0484942	0.0494856
	1.6	-0.00146956	0.00456159			2.36	-0.000680317	0.0084214
fitted curve	social engagement index	differences of probability			fitted curve	social engagement index	differences of probability
	-3	0.222603				-3	0.239628
	-2.99399	0.222268				-2.99399	0.239315
	-2.98799	0.221933				-2.98799	0.239002
	-2.98198	0.221598				-2.98198	0.238689
	-2.97598	0.221263				-2.97598	0.238376
	-2.96997	0.220928				-2.96997	0.238063
	-2.96396	0.220593				-2.96396	0.23775
	-2.95796	0.220257				-2.95796	0.237437
	-2.95195	0.219922				-2.95195	0.237124
	-2.94595	0.219587				-2.94595	0.236811
	-2.93994	0.219252				-2.93994	0.236498
	-2.93393	0.218917				-2.93393	0.236185
	-2.92793	0.218582				-2.92793	0.235872
	-2.92192	0.218247				-2.92192	0.235559
	-2.91592	0.217912				-2.91592	0.235246
	-2.90991	0.217577				-2.90991	0.234933
	-2.9039	0.217242				-2.9039	0.23462
	-2.8979	0.216906				-2.8979	0.234307
	-2.89189	0.216571				-2.89189	0.233994
	-2.88589	0.216236				-2.88589	0.233681
	-2.87988	0.215901				-2.87988	0.233368
	-2.87387	0.215566				-2.87387	0.233055
	-2.86787	0.215231				-2.86787	0.232742
	-2.86186	0.214896				-2.86186	0.232429
	-2.85586	0.214561				-2.85586	0.232116
	-2.84985	0.214226				-2.84985	0.231803
	-2.84384	0.213891				-2.84384	0.23149
	-2.83784	0.213555				-2.83784	0.231177
	-2.83183	0.21322				-2.83183	0.230864
	-2.82583	0.212885				-2.82583	0.230551
	-2.81982	0.21255				-2.81982	0.230238
	-2.81381	0.212215				-2.81381	0.229925
	-2.80781	0.21188				-2.80781	0.229612
	-2.8018	0.211545				-2.8018	0.229299
	-2.7958	0.21121				-2.7958	0.228986
	-2.78979	0.210875				-2.78979	0.228673
	-2.78378	0.210539				-2.78378	0.22836
	-2.77778	0.210204				-2.77778	0.228047
	-2.77177	0.209869				-2.77177	0.227734
	-2.76577	0.209534				-2.76577	0.227421
	-2.75976	0.209199				-2.75976	0.227108
	-2.75375	0.208864				-2.75375	0.226795
	-2.74775	0.208529				-2.74775	0.226482
	-2.74174	0.208194				-2.74174	0.226169
	-2.73574	0.207859				-2.73574	0.225856
	-2.72973	0.207524				-2.72973	0.225543
	-2.72372	0.207188				-2.72372	0.22523
	-2.71772	0.206853				-2.71772	0.224917
	-2.71171	0.206518				-2.71171	0.224604
	-2.70571	0.206183				-2.70571	0.224291
	-2.6997	0.205848				-2.6997	0.223978
	-2.69369	0.205513				-2.69369	0.223665
	-2.68769	0.205178				-2.68769	0.223352
	-2.68168	0.204843				-2.68168	0.223039
	-2.67568	0.204508				-2.67568	0.222726
	-2.66967	0.204173				-2.66967	0.222413
	-2.66366	0.203837				-2.66366	0.2221
	-2.65766	0.203502				-2.65766	0.221787
	-2.65165	0.203167				-2.65165	0.221474
	-2.64565	0.202832				-2.64565	0.221161
	-2.63964	0.202497				-2.63964	0.220848
	-2.63363	0.202162				-2.63363	0.220535
	-2.62763	0.201827				-2.62763	0.220222
	-2.62162	0.201492				-2.62162	0.219909
	-2.61562	0.201157				-2.61562	0.219596
	-2.60961	0.200821				-2.60961	0.219283
	-2.6036	0.200486				-2.6036	0.21897
	-2.5976	0.200151				-2.5976	0.218657
	-2.59159	0.199816				-2.59159	0.218344
	-2.58559	0.199481				-2.58559	0.218031
	-2.57958	0.199146				-2.57958	0.217718
	-2.57357	0.198811				-2.57357	0.217405
	-2.56757	0.198476				-2.56757	0.217092
	-2.56156	0.198141				-2.56156	0.216779
	-2.55556	0.197806				-2.55556	0.216466
	-2.54955	0.19747				-2.54955	0.216153
	-2.54354	0.197135				-2.54354	0.21584
	-2.53754	0.1968				-2.53754	0.215527
	-2.53153	0.196465				-2.53153	0.215214
	-2.52553	0.19613				-2.52553	0.214901
	-2.51952	0.195795				-2.51952	0.214588
	-2.51351	0.19546				-2.51351	0.214275
	-2.50751	0.195125				-2.50751	0.213962
	-2.5015	0.19479				-2.5015	0.213649
	-2.4955	0.194455				-2.4955	0.213336
	-2.48949	0.194119				-2.48949	0.213023
	-2.48348	0.193784				-2.48348	0.21271
	-2.47748	0.193449				-2.47748	0.212397
	-2.47147	0.193114				-2.47147	0.212084
	-2.46547	0.192779				-2.46547	0.211771
	-2.45946	0.192444				-2.45946	0.211458
	-2.45345	0.192109				-2.45345	0.211145
	-2.44745	0.191774				-2.44745	0.210832
	-2.44144	0.191439				-2.44144	0.210519
	-2.43544	0.191104				-2.43544	0.210206
	-2.42943	0.190768				-2.42943	0.209893
	-2.42342	0.190433				-2.42342	0.20958
	-2.41742	0.190098				-2.41742	0.209267
	-2.41141	0.189763				-2.41141	0.208954
	-2.40541	0.189428				-2.40541	0.208641
	-2.3994	0.189093				-2.3994	0.208328
	-2.39339	0.188758				-2.39339	0.208015
	-2.38739	0.188423				-2.38739	0.207702
	-2.38138	0.188088				-2.38138	0.207389
	-2.37538	0.187753				-2.37538	0.207076
	-2.36937	0.187417				-2.36937	0.206763
	-2.36336	0.187082				-2.36336	0.20645
	-2.35736	0.186747				-2.35736	0.206137
	-2.35135	0.186412				-2.35135	0.205824
	-2.34535	0.186077				-2.34535	0.205511
	-2.33934	0.185742				-2.33934	0.205198
	-2.33333	0.185407				-2.33333	0.204885
	-2.32733	0.185072				-2.32733	0.204572
	-2.32132	0.184737				-2.32132	0.204259
	-2.31532	0.184401				-2.31532	0.203946
	-2.30931	0.184066				-2.30931	0.203633
	-2.3033	0.183731				-2.3033	0.20332
	-2.2973	0.183396				-2.2973	0.203007
	-2.29129	0.183061				-2.29129	0.202694
	-2.28529	0.182726				-2.28529	0.202381
	-2.27928	0.182391				-2.27928	0.202068
	-2.27327	0.182056				-2.27327	0.201755
	-2.26727	0.181721				-2.26727	0.201442
	-2.26126	0.181386				-2.26126	0.201129
	-2.25526	0.18105				-2.25526	0.200816
	-2.24925	0.180715				-2.24925	0.200503
	-2.24324	0.18038				-2.24324	0.20019
	-2.23724	0.180045				-2.23724	0.199877
	-2.23123	0.17971				-2.23123	0.199564
	-2.22523	0.179375				-2.22523	0.199251
	-2.21922	0.17904				-2.21922	0.198938
	-2.21321	0.178705				-2.21321	0.198625
	-2.20721	0.17837				-2.20721	0.198312
	-2.2012	0.178035				-2.2012	0.197999
	-2.1952	0.177699				-2.1952	0.197686
	-2.18919	0.177364				-2.18919	0.197373
	-2.18318	0.177029				-2.18318	0.19706
	-2.17718	0.176694				-2.17718	0.196747
	-2.17117	0.176359				-2.17117	0.196434
	-2.16517	0.176024				-2.16517	0.196121
	-2.15916	0.175689				-2.15916	0.195808
	-2.15315	0.175354				-2.15315	0.195495
	-2.14715	0.175019				-2.14715	0.195182
	-2.14114	0.174684				-2.14114	0.194869
	-2.13514	0.174348				-2.13514	0.194556
	-2.12913	0.174013				-2.12913	0.194243
	-2.12312	0.173678				-2.12312	0.19393
	-2.11712	0.173343				-2.11712	0.193617
	-2.11111	0.173008				-2.11111	0.193304
	-2.10511	0.172673				-2.10511	0.192991
	-2.0991	0.172338				-2.0991	0.192678
	-2.09309	0.172003				-2.09309	0.192365
	-2.08709	0.171668				-2.08709	0.192052
	-2.08108	0.171332				-2.08108	0.191739
	-2.07508	0.170997				-2.07508	0.191426
	-2.06907	0.170662				-2.06907	0.191113
	-2.06306	0.170327				-2.06306	0.1908
	-2.05706	0.169992				-2.05706	0.190487
	-2.05105	0.169657				-2.05105	0.190174
	-2.04505	0.169322				-2.04505	0.189861
	-2.03904	0.168987				-2.03904	0.189548
	-2.03303	0.168652				-2.03303	0.189235
	-2.02703	0.168317				-2.02703	0.188922
	-2.02102	0.167981				-2.02102	0.188609
	-2.01502	0.167646				-2.01502	0.188296
	-2.00901	0.167311				-2.00901	0.187983
	-2.003	0.166976				-2.003	0.18767
	-1.997	0.166641				-1.997	0.187357
	-1.99099	0.166306				-1.99099	0.187044
	-1.98498	0.165971				-1.98498	0.186731
	-1.97898	0.165636				-1.97898	0.186418
	-1.97297	0.165301				-1.97297	0.186105
	-1.96697	0.164966				-1.96697	0.185792
	-1.96096	0.16463				-1.96096	0.185479
	-1.95495	0.164295				-1.95495	0.185166
	-1.94895	0.16396				-1.94895	0.184853
	-1.94294	0.163625				-1.94294	0.18454
	-1.93694	0.16329				-1.93694	0.184227
	-1.93093	0.162955				-1.93093	0.183914
	-1.92492	0.16262				-1.92492	0.183601
	-1.91892	0.162285				-1.91892	0.183288
	-1.91291	0.16195				-1.91291	0.182975
	-1.90691	0.161615				-1.90691	0.182662
	-1.9009	0.161279				-1.9009	0.182349
	-1.89489	0.160944				-1.89489	0.182036
	-1.88889	0.160609				-1.88889	0.181723
	-1.88288	0.160274				-1.88288	0.18141
	-1.87688	0.159939				-1.87688	0.181097
	-1.87087	0.159604				-1.87087	0.180784
	-1.86486	0.159269				-1.86486	0.180471
	-1.85886	0.158934				-1.85886	0.180158
	-1.85285	0.158599				-1.85285	0.179845
	-1.84685	0.158263				-1.84685	0.179532
	-1.84084	0.157928				-1.84084	0.179219
	-1.83483	0.157593				-1.83483	0.178906
	-1.82883	0.157258				-1.82883	0.178593
	-1.82282	0.156923				-1.82282	0.17828
	-1.81682	0.156588				-1.81682	0.177967
	-1.81081	0.156253				-1.81081	0.177654
	-1.8048	0.155918				-1.8048	0.177341
	-1.7988	0.155583				-1.7988	0.177028
	-1.79279	0.155248				-1.79279	0.176715
	-1.78679	0.154912				-1.78679	0.176402
	-1.78078	0.154577				-1.78078	0.176089
	-1.77477	0.154242				-1.77477	0.175776
	-1.76877	0.153907				-1.76877	0.175463
	-1.76276	0.153572				-1.76276	0.17515
	-1.75676	0.153237				-1.75676	0.174837
	-1.75075	0.152902				-1.75075	0.174524
	-1.74474	0.152567				-1.74474	0.174211
	-1.73874	0.152232				-1.73874	0.173898
	-1.73273	0.151897				-1.73273	0.173585
	-1.72673	0.151561				-1.72673	0.173272
	-1.72072	0.151226				-1.72072	0.172959
	-1.71471	0.150891				-1.71471	0.172646
	-1.70871	0.150556				-1.70871	0.172333
	-1.7027	0.150221				-1.7027	0.17202
	-1.6967	0.149886				-1.6967	0.171707
	-1.69069	0.149551				-1.69069	0.171394
	-1.68468	0.149216				-1.68468	0.171081
	-1.67868	0.148881				-1.67868	0.170768
	-1.67267	0.148546				-1.67267	0.170455
	-1.66667	0.14821				-1.66667	0.170142
	-1.66066	0.147875				-1.66066	0.169829
	-1.65465	0.14754				-1.65465	0.169516
	-1.64865	0.147205				-1.64865	0.169203
	-1.64264	0.14687				-1.64264	0.16889
	-1.63664	0.146535				-1.63664	0.168577
	-1.63063	0.1462				-1.63063	0.168264
	-1.62462	0.145865				-1.62462	0.167951
	-1.61862	0.14553				-1.61862	0.167638
	-1.61261	0.145195				-1.61261	0.167325
	-1.60661	0.144859				-1.60661	0.167012
	-1.6006	0.144524				-1.6006	0.166699
	-1.59459	0.144189				-1.59459	0.166386
	-1.58859	0.143854				-1.58859	0.166073
	-1.58258	0.143519				-1.58258	0.16576
	-1.57658	0.143184				-1.57658	0.165447
	-1.57057	0.142849				-1.57057	0.165134
	-1.56456	0.142514				-1.56456	0.164821
	-1.55856	0.142179				-1.55856	0.164508
	-1.55255	0.141843				-1.55255	0.164195
	-1.54655	0.141508				-1.54655	0.163882
	-1.54054	0.141173				-1.54054	0.163569
	-1.53453	0.140838				-1.53453	0.163256
	-1.52853	0.140503				-1.52853	0.162943
	-1.52252	0.140168				-1.52252	0.16263
	-1.51652	0.139833				-1.51652	0.162317
	-1.51051	0.139498				-1.51051	0.162004
	-1.5045	0.139163				-1.5045	0.161691
	-1.4985	0.138828				-1.4985	0.161378
	-1.49249	0.138492				-1.49249	0.161065
	-1.48649	0.138157				-1.48649	0.160752
	-1.48048	0.137822				-1.48048	0.160439
	-1.47447	0.137487				-1.47447	0.160126
	-1.46847	0.137152				-1.46847	0.159813
	-1.46246	0.136817				-1.46246	0.1595
	-1.45646	0.136482				-1.45646	0.159187
	-1.45045	0.136147				-1.45045	0.158874
	-1.44444	0.135812				-1.44444	0.158561
	-1.43844	0.135477				-1.43844	0.158248
	-1.43243	0.135141				-1.43243	0.157935
	-1.42643	0.134806				-1.42643	0.157622
	-1.42042	0.134471				-1.42042	0.157309
	-1.41441	0.134136				-1.41441	0.156996
	-1.40841	0.133801				-1.40841	0.156683
	-1.4024	0.133466				-1.4024	0.15637
	-1.3964	0.133131				-1.3964	0.156057
	-1.39039	0.132796				-1.39039	0.155744
	-1.38438	0.132461				-1.38438	0.155431
	-1.37838	0.132126				-1.37838	0.155118
	-1.37237	0.13179				-1.37237	0.154805
	-1.36637	0.131455				-1.36637	0.154492
	-1.36036	0.13112				-1.36036	0.154179
	-1.35435	0.130785				-1.35435	0.153866
	-1.34835	0.13045				-1.34835	0.153553
	-1.34234	0.130115				-1.34234	0.15324
	-1.33634	0.12978				-1.33634	0.152927
	-1.33033	0.129445				-1.33033	0.152614
	-1.32432	0.12911				-1.32432	0.152302
	-1.31832	0.128774				-1.31832	0.151988
	-1.31231	0.128439				-1.31231	0.151675
	-1.30631	0.128104				-1.30631	0.151363
	-1.3003	0.127769				-1.3003	0.15105
	-1.29429	0.127434				-1.29429	0.150737
	-1.28829	0.127099				-1.28829	0.150424
	-1.28228	0.126764				-1.28228	0.150111
	-1.27628	0.126429				-1.27628	0.149798
	-1.27027	0.126094				-1.27027	0.149485
	-1.26426	0.125759				-1.26426	0.149172
	-1.25826	0.125423				-1.25826	0.148859
	-1.25225	0.125088				-1.25225	0.148546
	-1.24625	0.124753				-1.24625	0.148233
	-1.24024	0.124418				-1.24024	0.14792
	-1.23423	0.124083				-1.23423	0.147607
	-1.22823	0.123748				-1.22823	0.147294
	-1.22222	0.123413				-1.22222	0.146981
	-1.21622	0.123078				-1.21622	0.146668
	-1.21021	0.122743				-1.21021	0.146355
	-1.2042	0.122408				-1.2042	0.146042
	-1.1982	0.122072				-1.1982	0.145729
	-1.19219	0.121737				-1.19219	0.145416
	-1.18619	0.121402				-1.18619	0.145103
	-1.18018	0.121067				-1.18018	0.14479
	-1.17417	0.120732				-1.17417	0.144477
	-1.16817	0.120397				-1.16817	0.144164
	-1.16216	0.120062				-1.16216	0.143851
	-1.15616	0.119727				-1.15616	0.143538
	-1.15015	0.119392				-1.15015	0.143225
	-1.14414	0.119056				-1.14414	0.142912
	-1.13814	0.118721				-1.13814	0.142599
	-1.13213	0.118386				-1.13213	0.142286
	-1.12613	0.118051				-1.12613	0.141973
	-1.12012	0.117716				-1.12012	0.14166
	-1.11411	0.117381				-1.11411	0.141347
	-1.10811	0.117046				-1.10811	0.141034
	-1.1021	0.116711				-1.1021	0.140721
	-1.0961	0.116376				-1.0961	0.140408
	-1.09009	0.116041				-1.09009	0.140095
	-1.08408	0.115705				-1.08408	0.139782
	-1.07808	0.11537				-1.07808	0.139469
	-1.07207	0.115035				-1.07207	0.139156
	-1.06607	0.1147				-1.06607	0.138843
	-1.06006	0.114365				-1.06006	0.13853
	-1.05405	0.11403				-1.05405	0.138217
	-1.04805	0.113695				-1.04805	0.137904
	-1.04204	0.11336				-1.04204	0.137591
	-1.03604	0.113025				-1.03604	0.137278
	-1.03003	0.11269				-1.03003	0.136965
	-1.02402	0.112354				-1.02402	0.136652
	-1.01802	0.112019				-1.01802	0.136339
	-1.01201	0.111684				-1.01201	0.136026
	-1.00601	0.111349				-1.00601	0.135713
	-1	0.111014				-1	0.1354
	-0.993994	0.110679				-0.993994	0.135087
	-0.987988	0.110344				-0.987988	0.134774
	-0.981982	0.110009				-0.981982	0.134461
	-0.975976	0.109674				-0.975976	0.134148
	-0.96997	0.109339				-0.96997	0.133835
	-0.963964	0.109003				-0.963964	0.133522
	-0.957958	0.108668				-0.957958	0.133209
	-0.951952	0.108333				-0.951952	0.132896
	-0.945946	0.107998				-0.945946	0.132583
	-0.93994	0.107663				-0.93994	0.13227
	-0.933934	0.107328				-0.933934	0.131957
	-0.927928	0.106993				-0.927928	0.131644
	-0.921922	0.106658				-0.921922	0.131331
	-0.915916	0.106323				-0.915916	0.131018
	-0.90991	0.105988				-0.90991	0.130705
	-0.903904	0.105652				-0.903904	0.130392
	-0.897898	0.105317				-0.897898	0.130079
	-0.891892	0.104982				-0.891892	0.129766
	-0.885886	0.104647				-0.885886	0.129453
	-0.87988	0.104312				-0.87988	0.12914
	-0.873874	0.103977				-0.873874	0.128827
	-0.867868	0.103642				-0.867868	0.128514
	-0.861862	0.103307				-0.861862	0.128201
	-0.855856	0.102972				-0.855856	0.127888
	-0.84985	0.102636				-0.84985	0.127575
	-0.843844	0.102301				-0.843844	0.127262
	-0.837838	0.101966				-0.837838	0.126949
	-0.831832	0.101631				-0.831832	0.126636
	-0.825826	0.101296				-0.825826	0.126323
	-0.81982	0.100961				-0.81982	0.12601
	-0.813814	0.100626				-0.813814	0.125697
	-0.807808	0.100291				-0.807808	0.125384
	-0.801802	0.0999557				-0.801802	0.125071
	-0.795796	0.0996206				-0.795796	0.124758
	-0.78979	0.0992854				-0.78979	0.124445
	-0.783784	0.0989504				-0.783784	0.124132
	-0.777778	0.0986153				-0.777778	0.123819
	-0.771772	0.0982801				-0.771772	0.123506
	-0.765766	0.097945				-0.765766	0.123193
	-0.75976	0.0976099				-0.75976	0.12288
	-0.753754	0.0972748				-0.753754	0.122567
	-0.747748	0.0969397				-0.747748	0.122254
	-0.741742	0.0966046				-0.741742	0.121941
	-0.735736	0.0962695				-0.735736	0.121628
	-0.72973	0.0959344				-0.72973	0.121315
	-0.723724	0.0955993				-0.723724	0.121002
	-0.717718	0.0952642				-0.717718	0.120689
	-0.711712	0.0949291				-0.711712	0.120376
	-0.705706	0.094594				-0.705706	0.120063
	-0.6997	0.0942589				-0.6997	0.11975
	-0.693694	0.0939238				-0.693694	0.119437
	-0.687688	0.0935887				-0.687688	0.119124
	-0.681682	0.0932536				-0.681682	0.118811
	-0.675676	0.0929185				-0.675676	0.118498
	-0.66967	0.0925834				-0.66967	0.118185
	-0.663664	0.0922483				-0.663664	0.117872
	-0.657658	0.0919132				-0.657658	0.117559
	-0.651652	0.0915781				-0.651652	0.117246
	-0.645646	0.091243				-0.645646	0.116933
	-0.63964	0.0909079				-0.63964	0.11662
	-0.633634	0.0905728				-0.633634	0.116307
	-0.627628	0.0902377				-0.627628	0.115994
	-0.621622	0.0899026				-0.621622	0.115681
	-0.615616	0.0895675				-0.615616	0.115368
	-0.60961	0.0892324				-0.60961	0.115055
	-0.603604	0.0888973				-0.603604	0.114742
	-0.597598	0.0885622				-0.597598	0.114429
	-0.591592	0.0882271				-0.591592	0.114116
	-0.585586	0.087892				-0.585586	0.113803
	-0.57958	0.0875569				-0.57958	0.11349
	-0.573574	0.0872218				-0.573574	0.113177
	-0.567568	0.0868867				-0.567568	0.112864
	-0.561562	0.0865516				-0.561562	0.112551
	-0.555556	0.0862165				-0.555556	0.112238
	-0.54955	0.0858813				-0.54955	0.111925
	-0.543543	0.0855463				-0.543543	0.111612
	-0.537538	0.0852111				-0.537538	0.111299
	-0.531532	0.084876				-0.531532	0.110986
	-0.525525	0.084541				-0.525525	0.110673
	-0.51952	0.0842058				-0.51952	0.11036
	-0.513513	0.0838707				-0.513513	0.110047
	-0.507508	0.0835356				-0.507508	0.109734
	-0.501502	0.0832005				-0.501502	0.109421
	-0.495495	0.0828654				-0.495495	0.109108
	-0.48949	0.0825303				-0.48949	0.108795
	-0.483484	0.0821952				-0.483484	0.108482
	-0.477477	0.0818601				-0.477477	0.108169
	-0.471471	0.081525				-0.471471	0.107856
	-0.465465	0.0811899				-0.465465	0.107543
	-0.459459	0.0808548				-0.459459	0.10723
	-0.453453	0.0805197				-0.453453	0.106917
	-0.447447	0.0801846				-0.447447	0.106604
	-0.441441	0.0798495				-0.441441	0.106291
	-0.435435	0.0795144				-0.435435	0.105978
	-0.429429	0.0791793				-0.429429	0.105665
	-0.423423	0.0788442				-0.423423	0.105352
	-0.417417	0.0785091				-0.417417	0.105039
	-0.411411	0.078174				-0.411411	0.104726
	-0.405405	0.0778389				-0.405405	0.104413
	-0.399399	0.0775038				-0.399399	0.1041
	-0.393393	0.0771687				-0.393393	0.103787
	-0.387387	0.0768336				-0.387387	0.103474
	-0.381381	0.0764985				-0.381381	0.103161
	-0.375375	0.0761634				-0.375375	0.102848
	-0.369369	0.0758283				-0.369369	0.102535
	-0.363363	0.0754932				-0.363363	0.102222
	-0.357357	0.0751581				-0.357357	0.101909
	-0.351351	0.074823				-0.351351	0.101596
	-0.345345	0.0744879				-0.345345	0.101283
	-0.339339	0.0741528				-0.339339	0.10097
	-0.333333	0.0738177				-0.333333	0.100657
	-0.327327	0.0734826				-0.327327	0.100344
	-0.321321	0.0731475				-0.321321	0.100031
	-0.315315	0.0728124				-0.315315	0.0997181
	-0.309309	0.0724773				-0.309309	0.0994051
	-0.303303	0.0721422				-0.303303	0.0990921
	-0.297297	0.071807				-0.297297	0.0987791
	-0.291291	0.071472				-0.291291	0.0984661
	-0.285285	0.0711369				-0.285285	0.0981531
	-0.279279	0.0708017				-0.279279	0.0978401
	-0.273273	0.0704666				-0.273273	0.0975271
	-0.267267	0.0701315				-0.267267	0.0972141
	-0.261261	0.0697964				-0.261261	0.0969011
	-0.255255	0.0694613				-0.255255	0.0965881
	-0.249249	0.0691262				-0.249249	0.0962751
	-0.243243	0.0687911				-0.243243	0.0959621
	-0.237237	0.068456				-0.237237	0.0956491
	-0.231231	0.0681209				-0.231231	0.0953361
	-0.225225	0.0677858				-0.225225	0.0950231
	-0.219219	0.0674507				-0.219219	0.0947101
	-0.213213	0.0671156				-0.213213	0.0943971
	-0.207207	0.0667805				-0.207207	0.0940841
	-0.201201	0.0664454				-0.201201	0.0937711
	-0.195195	0.0661103				-0.195195	0.0934581
	-0.189189	0.0657752				-0.189189	0.0931451
	-0.183183	0.0654401				-0.183183	0.0928321
	-0.177177	0.065105				-0.177177	0.0925191
	-0.171171	0.0647699				-0.171171	0.0922061
	-0.165165	0.0644348				-0.165165	0.0918931
	-0.159159	0.0640997				-0.159159	0.0915801
	-0.153153	0.0637646				-0.153153	0.0912672
	-0.147147	0.0634295				-0.147147	0.0909542
	-0.141141	0.0630944				-0.141141	0.0906412
	-0.135135	0.0627593				-0.135135	0.0903282
	-0.129129	0.0624242				-0.129129	0.0900152
	-0.123123	0.0620891				-0.123123	0.0897022
	-0.117117	0.061754				-0.117117	0.0893892
	-0.111111	0.0614189				-0.111111	0.0890762
	-0.105105	0.0610838				-0.105105	0.0887632
	-0.0990991	0.0607487				-0.0990991	0.0884502
	-0.0930931	0.0604136				-0.0930931	0.0881372
	-0.0870871	0.0600785				-0.0870871	0.0878242
	-0.0810811	0.0597434				-0.0810811	0.0875112
	-0.0750751	0.0594083				-0.0750751	0.0871982
	-0.0690691	0.0590732				-0.0690691	0.0868852
	-0.0630631	0.0587381				-0.0630631	0.0865722
	-0.0570571	0.058403				-0.0570571	0.0862592
	-0.0510511	0.0580678				-0.0510511	0.0859462
	-0.045045	0.0577327				-0.045045	0.0856332
	-0.039039	0.0573976				-0.039039	0.0853202
	-0.033033	0.0570625				-0.033033	0.0850072
	-0.027027	0.0567274				-0.027027	0.0846942
	-0.021021	0.0563923				-0.021021	0.0843812
	-0.015015	0.0560572				-0.015015	0.0840682
	-0.00900901	0.0557221				-0.00900901	0.0837552
	-0.003003	0.055387				-0.003003	0.0834422
	0.003003	0.0550519				0.003003	0.0831292
	0.00900901	0.0547168				0.00900901	0.0828162
	0.015015	0.0543817				0.015015	0.0825032
	0.021021	0.0540466				0.021021	0.0821903
	0.027027	0.0537115				0.027027	0.0818773
	0.033033	0.0533764				0.033033	0.0815643
	0.039039	0.0530413				0.039039	0.0812513
	0.045045	0.0527062				0.045045	0.0809383
	0.0510511	0.0523711				0.0510511	0.0806253
	0.0570571	0.052036				0.0570571	0.0803123
	0.0630631	0.0517009				0.0630631	0.0799993
	0.0690691	0.0513658				0.0690691	0.0796863
	0.0750751	0.0510307				0.0750751	0.0793733
	0.0810811	0.0506956				0.0810811	0.0790603
	0.0870871	0.0503605				0.0870871	0.0787473
	0.0930931	0.0500254				0.0930931	0.0784343
	0.0990991	0.0496903				0.0990991	0.0781213
	0.105105	0.0493552				0.105105	0.0778083
	0.111111	0.0490201				0.111111	0.0774953
	0.117117	0.048685				0.117117	0.0771823
	0.123123	0.0483499				0.123123	0.0768693
	0.129129	0.0480148				0.129129	0.0765563
	0.135135	0.0476797				0.135135	0.0762433
	0.141141	0.0473446				0.141141	0.0759303
	0.147147	0.0470095				0.147147	0.0756173
	0.153153	0.0466744				0.153153	0.0753043
	0.159159	0.0463393				0.159159	0.0749913
	0.165165	0.0460042				0.165165	0.0746783
	0.171171	0.0456691				0.171171	0.0743653
	0.177177	0.045334				0.177177	0.0740523
	0.183183	0.0449988				0.183183	0.0737393
	0.189189	0.0446638				0.189189	0.0734263
	0.195195	0.0443286				0.195195	0.0731133
	0.201201	0.0439935				0.201201	0.0728003
	0.207207	0.0436584				0.207207	0.0724874
	0.213213	0.0433233				0.213213	0.0721744
	0.219219	0.0429882				0.219219	0.0718614
	0.225225	0.0426531				0.225225	0.0715484
	0.231231	0.042318				0.231231	0.0712354
	0.237237	0.0419829				0.237237	0.0709224
	0.243243	0.0416478				0.243243	0.0706094
	0.249249	0.0413127				0.249249	0.0702964
	0.255255	0.0409776				0.255255	0.0699834
	0.261261	0.0406425				0.261261	0.0696704
	0.267267	0.0403074				0.267267	0.0693574
	0.273273	0.0399723				0.273273	0.0690444
	0.279279	0.0396372				0.279279	0.0687314
	0.285285	0.0393021				0.285285	0.0684184
	0.291291	0.038967				0.291291	0.0681054
	0.297297	0.0386319				0.297297	0.0677924
	0.303303	0.0382968				0.303303	0.0674794
	0.309309	0.0379617				0.309309	0.0671664
	0.315315	0.0376266				0.315315	0.0668534
	0.321321	0.0372915				0.321321	0.0665404
	0.327327	0.0369564				0.327327	0.0662274
	0.333333	0.0366213				0.333333	0.0659144
	0.339339	0.0362862				0.339339	0.0656014
	0.345345	0.0359511				0.345345	0.0652884
	0.351351	0.035616				0.351351	0.0649754
	0.357357	0.0352809				0.357357	0.0646624
	0.363363	0.0349458				0.363363	0.0643494
	0.369369	0.0346107				0.369369	0.0640364
	0.375375	0.0342756				0.375375	0.0637234
	0.381381	0.0339405				0.381381	0.0634104
	0.387387	0.0336054				0.387387	0.0630975
	0.393393	0.0332703				0.393393	0.0627845
	0.399399	0.0329352				0.399399	0.0624715
	0.405405	0.0326001				0.405405	0.0621585
	0.411411	0.032265				0.411411	0.0618455
	0.417417	0.0319299				0.417417	0.0615325
	0.423423	0.0315948				0.423423	0.0612195
	0.429429	0.0312596				0.429429	0.0609065
	0.435435	0.0309245				0.435435	0.0605935
	0.441441	0.0305894				0.441441	0.0602805
	0.447447	0.0302543				0.447447	0.0599675
	0.453453	0.0299192				0.453453	0.0596545
	0.459459	0.0295841				0.459459	0.0593415
	0.465465	0.029249				0.465465	0.0590285
	0.471471	0.0289139				0.471471	0.0587155
	0.477477	0.0285788				0.477477	0.0584025
	0.483484	0.0282437				0.483484	0.0580895
	0.48949	0.0279086				0.48949	0.0577765
	0.495495	0.0275735				0.495495	0.0574635
	0.501502	0.0272384				0.501502	0.0571505
	0.507508	0.0269033				0.507508	0.0568375
	0.513513	0.0265682				0.513513	0.0565245
	0.51952	0.0262331				0.51952	0.0562115
	0.525525	0.025898				0.525525	0.0558985
	0.531532	0.0255629				0.531532	0.0555855
	0.537538	0.0252278				0.537538	0.0552725
	0.543543	0.0248927				0.543543	0.0549595
	0.54955	0.0245576				0.54955	0.0546465
	0.555556	0.0242225				0.555556	0.0543336
	0.561562	0.0238874				0.561562	0.0540206
	0.567568	0.0235523				0.567568	0.0537076
	0.573574	0.0232172				0.573574	0.0533946
	0.57958	0.0228821				0.57958	0.0530816
	0.585586	0.022547				0.585586	0.0527686
	0.591592	0.0222119				0.591592	0.0524556
	0.597598	0.0218768				0.597598	0.0521426
	0.603604	0.0215417				0.603604	0.0518296
	0.60961	0.0212066				0.60961	0.0515166
	0.615616	0.0208715				0.615616	0.0512036
	0.621622	0.0205364				0.621622	0.0508906
	0.627628	0.0202013				0.627628	0.0505776
	0.633634	0.0198662				0.633634	0.0502646
	0.63964	0.0195311				0.63964	0.0499516
	0.645646	0.019196				0.645646	0.0496386
	0.651652	0.0188609				0.651652	0.0493256
	0.657658	0.0185258				0.657658	0.0490126
	0.663664	0.0181907				0.663664	0.0486996
	0.66967	0.0178556				0.66967	0.0483866
	0.675676	0.0175204				0.675676	0.0480736
	0.681682	0.0171853				0.681682	0.0477606
	0.687688	0.0168502				0.687688	0.0474476
	0.693694	0.0165151				0.693694	0.0471346
	0.6997	0.01618				0.6997	0.0468216
	0.705706	0.0158449				0.705706	0.0465086
	0.711712	0.0155098				0.711712	0.0461956
	0.717718	0.0151747				0.717718	0.0458826
	0.723724	0.0148396				0.723724	0.0455696
	0.72973	0.0145045				0.72973	0.0452566
	0.735736	0.0141694				0.735736	0.0449437
	0.741742	0.0138343				0.741742	0.0446307
	0.747748	0.0134992				0.747748	0.0443177
	0.753754	0.0131641				0.753754	0.0440047
	0.75976	0.012829				0.75976	0.0436917
	0.765766	0.0124939				0.765766	0.0433787
	0.771772	0.0121588				0.771772	0.0430657
	0.777778	0.0118237				0.777778	0.0427527
	0.783784	0.0114886				0.783784	0.0424397
	0.78979	0.0111535				0.78979	0.0421267
	0.795796	0.0108184				0.795796	0.0418137
	0.801802	0.0104833				0.801802	0.0415007
	0.807808	0.0101482				0.807808	0.0411877
	0.813814	0.00981309				0.813814	0.0408747
	0.81982	0.00947799				0.81982	0.0405617
	0.825826	0.00914288				0.825826	0.0402487
	0.831832	0.00880778				0.831832	0.0399357
	0.837838	0.00847268				0.837838	0.0396227
	0.843844	0.00813758				0.843844	0.0393097
	0.84985	0.00780247				0.84985	0.0389967
	0.855856	0.00746737				0.855856	0.0386837
	0.861862	0.00713227				0.861862	0.0383707
	0.867868	0.00679717				0.867868	0.0380577
	0.873874	0.00646207				0.873874	0.0377447
	0.87988	0.00612696				0.87988	0.0374317
	0.885886	0.00579186				0.885886	0.0371187
	0.891892	0.00545676				0.891892	0.0368057
	0.897898	0.00512166				0.897898	0.0364927
	0.903904	0.00478655				0.903904	0.0361797
	0.90991	0.00445145				0.90991	0.0358667
	0.915916	0.00411635				0.915916	0.0355538
	0.921922	0.00378124				0.921922	0.0352408
	0.927928	0.00344614				0.927928	0.0349278
	0.933934	0.00311104				0.933934	0.0346148
	0.93994	0.00277594				0.93994	0.0343018
	0.945946	0.00244084				0.945946	0.0339888
	0.951952	0.00210573				0.951952	0.0336758
	0.957958	0.00177063				0.957958	0.0333628
	0.963964	0.00143553				0.963964	0.0330498
	0.96997	0.00110042				0.96997	0.0327368
	0.975976	0.000765322				0.975976	0.0324238
	0.981982	0.00043022				0.981982	0.0321108
	0.987988	9.51174e-05				0.987988	0.0317978
	0.993994	-0.000239985				0.993994	0.0314848
	1	-0.000575088				1	0.0311718
	1.00601	-0.00091019				1.00601	0.0308588
	1.01201	-0.00124529				1.01201	0.0305458
	1.01802	-0.0015804				1.01802	0.0302328
	1.02402	-0.0019155				1.02402	0.0299198
	1.03003	-0.0022506				1.03003	0.0296068
	1.03604	-0.0025857				1.03604	0.0292938
	1.04204	-0.0029208				1.04204	0.0289808
	1.04805	-0.00325591				1.04805	0.0286678
	1.05405	-0.00359101				1.05405	0.0283548
	1.06006	-0.00392611				1.06006	0.0280418
	1.06607	-0.00426121				1.06607	0.0277288
	1.07207	-0.00459632				1.07207	0.0274158
	1.07808	-0.00493142				1.07808	0.0271028
	1.08408	-0.00526652				1.08408	0.0267898
	1.09009	-0.00560162				1.09009	0.0264768
	1.0961	-0.00593673				1.0961	0.0261638
	1.1021	-0.00627183				1.1021	0.0258509
	1.10811	-0.00660693				1.10811	0.0255379
	1.11411	-0.00694203				1.11411	0.0252249
	1.12012	-0.00727714				1.12012	0.0249119
	1.12613	-0.00761224				1.12613	0.0245989
	1.13213	-0.00794734				1.13213	0.0242859
	1.13814	-0.00828244				1.13814	0.0239729
	1.14414	-0.00861755				1.14414	0.0236599
	1.15015	-0.00895265				1.15015	0.0233469
	1.15616	-0.00928775				1.15616	0.0230339
	1.16216	-0.00962285				1.16216	0.0227209
	1.16817	-0.00995796				1.16817	0.0224079
	1.17417	-0.0102931				1.17417	0.0220949
	1.18018	-0.0106282				1.18018	0.0217819
	1.18619	-0.0109633				1.18619	0.0214689
	1.19219	-0.0112984				1.19219	0.0211559
	1.1982	-0.0116335				1.1982	0.0208429
	1.2042	-0.0119686				1.2042	0.0205299
	1.21021	-0.0123037				1.21021	0.0202169
	1.21622	-0.0126388				1.21622	0.0199039
	1.22222	-0.0129739				1.22222	0.0195909
	1.22823	-0.013309				1.22823	0.0192779
	1.23423	-0.0136441				1.23423	0.0189649
	1.24024	-0.0139792				1.24024	0.0186519
	1.24625	-0.0143143				1.24625	0.0183389
	1.25225	-0.0146494				1.25225	0.0180259
	1.25826	-0.0149845				1.25826	0.0177129
	1.26426	-0.0153196				1.26426	0.0173999
	1.27027	-0.0156547				1.27027	0.0170869
	1.27628	-0.0159898				1.27628	0.0167739
	1.28228	-0.0163249				1.28228	0.016461
	1.28829	-0.01666				1.28829	0.016148
	1.29429	-0.0169951				1.29429	0.015835
	1.3003	-0.0173302				1.3003	0.015522
	1.30631	-0.0176653				1.30631	0.015209
	1.31231	-0.0180004				1.31231	0.014896
	1.31832	-0.0183355				1.31832	0.014583
	1.32432	-0.0186706				1.32432	0.01427
	1.33033	-0.0190057				1.33033	0.013957
	1.33634	-0.0193408				1.33634	0.013644
	1.34234	-0.0196759				1.34234	0.013331
	1.34835	-0.020011				1.34835	0.013018
	1.35435	-0.0203461				1.35435	0.012705
	1.36036	-0.0206812				1.36036	0.012392
	1.36637	-0.0210163				1.36637	0.012079
	1.37237	-0.0213514				1.37237	0.011766
	1.37838	-0.0216865				1.37838	0.011453
	1.38438	-0.0220216				1.38438	0.01114
	1.39039	-0.0223568				1.39039	0.010827
	1.3964	-0.0226919				1.3964	0.010514
	1.4024	-0.023027				1.4024	0.010201
	1.40841	-0.0233621				1.40841	0.00988802
	1.41441	-0.0236972				1.41441	0.00957503
	1.42042	-0.0240323				1.42042	0.00926203
	1.42643	-0.0243674				1.42643	0.00894903
	1.43243	-0.0247025				1.43243	0.00863604
	1.43844	-0.0250376				1.43844	0.00832304
	1.44444	-0.0253727				1.44444	0.00801004
	1.45045	-0.0257078				1.45045	0.00769705
	1.45646	-0.0260429				1.45646	0.00738405
	1.46246	-0.026378				1.46246	0.00707105
	1.46847	-0.0267131				1.46847	0.00675806
	1.47447	-0.0270482				1.47447	0.00644506
	1.48048	-0.0273833				1.48048	0.00613206
	1.48649	-0.0277184				1.48649	0.00581907
	1.49249	-0.0280535				1.49249	0.00550607
	1.4985	-0.0283886				1.4985	0.00519307
	1.5045	-0.0287237				1.5045	0.00488008
	1.51051	-0.0290588				1.51051	0.00456708
	1.51652	-0.0293939				1.51652	0.00425408
	1.52252	-0.029729				1.52252	0.00394109
	1.52853	-0.0300641				1.52853	0.00362809
	1.53453	-0.0303992				1.53453	0.00331509
	1.54054	-0.0307343				1.54054	0.0030021
	1.54655	-0.0310694				1.54655	0.0026891
	1.55255	-0.0314045				1.55255	0.0023761
	1.55856	-0.0317396				1.55856	0.00206311
	1.56456	-0.0320747				1.56456	0.00175011
	1.57057	-0.0324098				1.57057	0.00143711
	1.57658	-0.0327449				1.57658	0.00112412
	1.58258	-0.03308				1.58258	0.000811119
	1.58859	-0.0334151				1.58859	0.000498123
	1.59459	-0.0337502				1.59459	0.000185126
	1.6006	-0.0340853				1.6006	-0.000127871
	1.60661	-0.0344204				1.60661	-0.000440867
	1.61261	-0.0347555				1.61261	-0.000753864
	1.61862	-0.0350906				1.61862	-0.00106686
	1.62462	-0.0354257				1.62462	-0.00137986
	1.63063	-0.0357608				1.63063	-0.00169285
	1.63664	-0.036096				1.63664	-0.00200585
	1.64264	-0.0364311				1.64264	-0.00231885
	1.64865	-0.0367662				1.64865	-0.00263184
	1.65465	-0.0371013				1.65465	-0.00294484
	1.66066	-0.0374364				1.66066	-0.00325784
	1.66667	-0.0377715				1.66667	-0.00357083
	1.67267	-0.0381066				1.67267	-0.00388383
	1.67868	-0.0384417				1.67868	-0.00419683
	1.68468	-0.0387768				1.68468	-0.00450982
	1.69069	-0.0391119				1.69069	-0.00482282
	1.6967	-0.039447				1.6967	-0.00513582
	1.7027	-0.0397821				1.7027	-0.00544881
	1.70871	-0.0401172				1.70871	-0.00576181
	1.71471	-0.0404523				1.71471	-0.00607481
	1.72072	-0.0407874				1.72072	-0.0063878
	1.72673	-0.0411225				1.72673	-0.0067008
	1.73273	-0.0414576				1.73273	-0.0070138
	1.73874	-0.0417927				1.73874	-0.00732679
	1.74474	-0.0421278				1.74474	-0.00763979
	1.75075	-0.0424629				1.75075	-0.00795279
	1.75676	-0.042798				1.75676	-0.00826578
	1.76276	-0.0431331				1.76276	-0.00857878
	1.76877	-0.0434682				1.76877	-0.00889178
	1.77477	-0.0438033				1.77477	-0.00920477
	1.78078	-0.0441384				1.78078	-0.00951777
	1.78679	-0.0444735				1.78679	-0.00983077
	1.79279	-0.0448086				1.79279	-0.0101438
	1.7988	-0.0451437				1.7988	-0.0104568
	1.8048	-0.0454788				1.8048	-0.0107698
	1.81081	-0.0458139				1.81081	-0.0110828
	1.81682	-0.046149				1.81682	-0.0113958
	1.82282	-0.0464841				1.82282	-0.0117087
	1.82883	-0.0468192				1.82883	-0.0120217
	1.83483	-0.0471543				1.83483	-0.0123347
	1.84084	-0.0474894				1.84084	-0.0126477
	1.84685	-0.0478245				1.84685	-0.0129607
	1.85285	-0.0481596				1.85285	-0.0132737
	1.85886	-0.0484947				1.85886	-0.0135867
	1.86486	-0.0488298				1.86486	-0.0138997
	1.87087	-0.0491649				1.87087	-0.0142127
	1.87688	-0.0495001				1.87688	-0.0145257
	1.88288	-0.0498352				1.88288	-0.0148387
	1.88889	-0.0501703				1.88889	-0.0151517
	1.89489	-0.0505054				1.89489	-0.0154647
	1.9009	-0.0508405				1.9009	-0.0157777
	1.90691	-0.0511756				1.90691	-0.0160907
	1.91291	-0.0515107				1.91291	-0.0164037
	1.91892	-0.0518458				1.91892	-0.0167167
	1.92492	-0.0521809				1.92492	-0.0170297
	1.93093	-0.052516				1.93093	-0.0173427
	1.93694	-0.0528511				1.93694	-0.0176557
	1.94294	-0.0531862				1.94294	-0.0179687
	1.94895	-0.0535213				1.94895	-0.0182817
	1.95495	-0.0538564				1.95495	-0.0185947
	1.96096	-0.0541915				1.96096	-0.0189077
	1.96697	-0.0545266				1.96697	-0.0192207
	1.97297	-0.0548617				1.97297	-0.0195337
	1.97898	-0.0551968				1.97898	-0.0198467
	1.98498	-0.0555319				1.98498	-0.0201597
	1.99099	-0.055867				1.99099	-0.0204727
	1.997	-0.0562021				1.997	-0.0207856
	2.003	-0.0565372				2.003	-0.0210986
	2.00901	-0.0568723				2.00901	-0.0214116
	2.01502	-0.0572074				2.01502	-0.0217246
	2.02102	-0.0575425				2.02102	-0.0220376
	2.02703	-0.0578776				2.02703	-0.0223506
	2.03303	-0.0582127				2.03303	-0.0226636
	2.03904	-0.0585478				2.03904	-0.0229766
	2.04505	-0.0588829				2.04505	-0.0232896
	2.05105	-0.059218				2.05105	-0.0236026
	2.05706	-0.0595531				2.05706	-0.0239156
	2.06306	-0.0598882				2.06306	-0.0242286
	2.06907	-0.0602233				2.06907	-0.0245416
	2.07508	-0.0605584				2.07508	-0.0248546
	2.08108	-0.0608935				2.08108	-0.0251676
	2.08709	-0.0612286				2.08709	-0.0254806
	2.09309	-0.0615637				2.09309	-0.0257936
	2.0991	-0.0618988				2.0991	-0.0261066
	2.10511	-0.0622339				2.10511	-0.0264196
	2.11111	-0.0625691				2.11111	-0.0267326
	2.11712	-0.0629042				2.11712	-0.0270456
	2.12312	-0.0632393				2.12312	-0.0273586
	2.12913	-0.0635744				2.12913	-0.0276716
	2.13514	-0.0639095				2.13514	-0.0279846
	2.14114	-0.0642446				2.14114	-0.0282976
	2.14715	-0.0645797				2.14715	-0.0286106
	2.15315	-0.0649148				2.15315	-0.0289236
	2.15916	-0.0652499				2.15916	-0.0292366
	2.16517	-0.065585				2.16517	-0.0295496
	2.17117	-0.0659201				2.17117	-0.0298626
	2.17718	-0.0662552				2.17718	-0.0301755
	2.18318	-0.0665903				2.18318	-0.0304885
	2.18919	-0.0669254				2.18919	-0.0308015
	2.1952	-0.0672605				2.1952	-0.0311145
	2.2012	-0.0675956				2.2012	-0.0314275
	2.20721	-0.0679307				2.20721	-0.0317405
	2.21321	-0.0682658				2.21321	-0.0320535
	2.21922	-0.0686009				2.21922	-0.0323665
	2.22523	-0.068936				2.22523	-0.0326795
	2.23123	-0.0692711				2.23123	-0.0329925
	2.23724	-0.0696062				2.23724	-0.0333055
	2.24324	-0.0699413				2.24324	-0.0336185
	2.24925	-0.0702764				2.24925	-0.0339315
	2.25526	-0.0706115				2.25526	-0.0342445
	2.26126	-0.0709466				2.26126	-0.0345575
	2.26727	-0.0712817				2.26727	-0.0348705
	2.27327	-0.0716168				2.27327	-0.0351835
	2.27928	-0.0719519				2.27928	-0.0354965
	2.28529	-0.072287				2.28529	-0.0358095
	2.29129	-0.0726221				2.29129	-0.0361225
	2.2973	-0.0729572				2.2973	-0.0364355
	2.3033	-0.0732923				2.3033	-0.0367485
	2.30931	-0.0736274				2.30931	-0.0370615
	2.31532	-0.0739625				2.31532	-0.0373745
	2.32132	-0.0742976				2.32132	-0.0376875
	2.32733	-0.0746327				2.32733	-0.0380005
	2.33333	-0.0749678				2.33333	-0.0383135
	2.33934	-0.0753029				2.33934	-0.0386265
	2.34535	-0.075638				2.34535	-0.0389395
	2.35135	-0.0759731				2.35135	-0.0392525
	2.35736	-0.0763082				2.35736	-0.0395654
	2.36336	-0.0766434				2.36336	-0.0398784
	2.36937	-0.0769785				2.36937	-0.0401914
	2.37538	-0.0773136				2.37538	-0.0405044
	2.38138	-0.0776487				2.38138	-0.0408174
	2.38739	-0.0779838				2.38739	-0.0411304
	2.39339	-0.0783189				2.39339	-0.0414434
	2.3994	-0.078654				2.3994	-0.0417564
	2.40541	-0.0789891				2.40541	-0.0420694
	2.41141	-0.0793242				2.41141	-0.0423824
	2.41742	-0.0796593				2.41742	-0.0426954
	2.42342	-0.0799944				2.42342	-0.0430084
	2.42943	-0.0803295				2.42943	-0.0433214
	2.43544	-0.0806646				2.43544	-0.0436344
	2.44144	-0.0809997				2.44144	-0.0439474
	2.44745	-0.0813348				2.44745	-0.0442604
	2.45345	-0.0816699				2.45345	-0.0445734
	2.45946	-0.082005				2.45946	-0.0448864
	2.46547	-0.0823401				2.46547	-0.0451994
	2.47147	-0.0826752				2.47147	-0.0455124
	2.47748	-0.0830103				2.47748	-0.0458254
	2.48348	-0.0833454				2.48348	-0.0461384
	2.48949	-0.0836805				2.48949	-0.0464514
	2.4955	-0.0840156				2.4955	-0.0467644
	2.5015	-0.0843507				2.5015	-0.0470774
	2.50751	-0.0846858				2.50751	-0.0473904
	2.51351	-0.0850209				2.51351	-0.0477034
	2.51952	-0.085356				2.51952	-0.0480164
	2.52553	-0.0856911				2.52553	-0.0483294
	2.53153	-0.0860262				2.53153	-0.0486424
	2.53754	-0.0863613				2.53754	-0.0489553
	2.54354	-0.0866964				2.54354	-0.0492683
	2.54955	-0.0870315				2.54955	-0.0495813
	2.55556	-0.0873666				2.55556	-0.0498943
	2.56156	-0.0877017				2.56156	-0.0502073
	2.56757	-0.0880368				2.56757	-0.0505203
	2.57357	-0.0883719				2.57357	-0.0508333
	2.57958	-0.088707				2.57958	-0.0511463
	2.58559	-0.0890421				2.58559	-0.0514593
	2.59159	-0.0893773				2.59159	-0.0517723
	2.5976	-0.0897123				2.5976	-0.0520853
	2.6036	-0.0900475				2.6036	-0.0523983
	2.60961	-0.0903826				2.60961	-0.0527113
	2.61562	-0.0907177				2.61562	-0.0530243
	2.62162	-0.0910528				2.62162	-0.0533373
	2.62763	-0.0913879				2.62763	-0.0536503
	2.63363	-0.091723				2.63363	-0.0539633
	2.63964	-0.0920581				2.63964	-0.0542763
	2.64565	-0.0923932				2.64565	-0.0545893
	2.65165	-0.0927283				2.65165	-0.0549023
	2.65766	-0.0930634				2.65766	-0.0552153
	2.66366	-0.0933985				2.66366	-0.0555283
	2.66967	-0.0937336				2.66967	-0.0558413
	2.67568	-0.0940687				2.67568	-0.0561543
	2.68168	-0.0944038				2.68168	-0.0564673
	2.68769	-0.0947389				2.68769	-0.0567803
	2.69369	-0.095074				2.69369	-0.0570933
	2.6997	-0.0954091				2.6997	-0.0574063
	2.70571	-0.0957442				2.70571	-0.0577193
	2.71171	-0.0960793				2.71171	-0.0580323
	2.71772	-0.0964144				2.71772	-0.0583452
	2.72372	-0.0967495				2.72372	-0.0586582
	2.72973	-0.0970846				2.72973	-0.0589712
	2.73574	-0.0974197				2.73574	-0.0592842
	2.74174	-0.0977548				2.74174	-0.0595972
	2.74775	-0.0980899				2.74775	-0.0599102
	2.75375	-0.098425				2.75375	-0.0602232
	2.75976	-0.0987601				2.75976	-0.0605362
	2.76577	-0.0990952				2.76577	-0.0608492
	2.77177	-0.0994303				2.77177	-0.0611622
	2.77778	-0.0997654				2.77778	-0.0614752
	2.78378	-0.100101				2.78378	-0.0617882
	2.78979	-0.100436				2.78979	-0.0621012
	2.7958	-0.100771				2.7958	-0.0624142
	2.8018	-0.101106				2.8018	-0.0627272
	2.80781	-0.101441				2.80781	-0.0630402
	2.81381	-0.101776				2.81381	-0.0633532
	2.81982	-0.102111				2.81982	-0.0636662
	2.82583	-0.102446				2.82583	-0.0639792
	2.83183	-0.102781				2.83183	-0.0642922
	2.83784	-0.103116				2.83784	-0.0646052
	2.84384	-0.103452				2.84384	-0.0649182
	2.84985	-0.103787				2.84985	-0.0652312
	2.85586	-0.104122				2.85586	-0.0655442
	2.86186	-0.104457				2.86186	-0.0658572
	2.86787	-0.104792				2.86787	-0.0661702
	2.87387	-0.105127				2.87387	-0.0664832
	2.87988	-0.105462				2.87988	-0.0667962
	2.88589	-0.105797				2.88589	-0.0671092
	2.89189	-0.106132				2.89189	-0.0674222
	2.8979	-0.106467				2.8979	-0.0677351
	2.9039	-0.106803				2.9039	-0.0680481
	2.90991	-0.107138				2.90991	-0.0683611
	2.91592	-0.107473				2.91592	-0.0686741
	2.92192	-0.107808				2.92192	-0.0689871
	2.92793	-0.108143				2.92793	-0.0693001
	2.93393	-0.108478				2.93393	-0.0696131
	2.93994	-0.108813				2.93994	-0.0699261
	2.94595	-0.109148				2.94595	-0.0702391
	2.95195	-0.109483				2.95195	-0.0705521
	2.95796	-0.109818				2.95796	-0.0708651
	2.96396	-0.110154				2.96396	-0.0711781
	2.96997	-0.110489				2.96997	-0.0714911
	2.97598	-0.110824				2.97598	-0.0718041
	2.98198	-0.111159				2.98198	-0.0721171
	2.98799	-0.111494				2.98799	-0.0724301
	2.99399	-0.111829				2.99399	-0.0727431
	3	-0.112164				3	-0.0730561

## Sheet: Fig.S2g
	differences of prabability	errorbar
in-group_saline	0.0467294	0.0117428
in-group_OT	0.0463545	0.0120986
out-group_saline	0.0609275	0.0136345
out-group_OT	0.0643823	0.0141384
