# Supplementary material for: Multi-dimensional social relationships shape social attention in monkeys
Source: eLife. 2025 Mar 7;14:RP104460. doi: 10.7554/eLife.104460 (PMC11888598; doi:10.7554/eLife.104460)
Supplement: Figure 3—figure supplement 2—source data 1. [file elife-104460-fig3-figsupp2-data1.xlsx]

## Sheet: Fig.S3b
	in-group
out-group	8.27183	8.24513	8.19187	8.13879	7.90212	7.87605	7.82403	7.7722	7.7722	7.74635	7.72054	7.72054	7.64338	7.61775	7.59217	7.59217	7.59217	7.56663	7.46491	7.41432	7.38909	7.38909	7.33876	7.31367	7.28862	7.26361	7.21373	7.18885	7.18885	7.18885	7.16402	7.13924	7.13924	7.11449	7.06515	7.01597	6.99145	6.96698	6.96698	6.94255	6.91816	6.91816	6.89382	6.89382	6.89382	6.86952	6.82106	6.7487	6.7487
	8.24513	8.21848	8.00686	7.85002	7.82403	7.82403	7.72054	7.66906	7.66906	7.64338	7.59217	7.56663	7.56663	7.49027	7.43959	7.38909	7.33876	7.31367	7.31367	7.28862	7.26361	7.21373	7.21373	7.13924	7.11449	7.11449	7.0898	7.06515	7.04054	6.99145	6.96698	6.94255	6.94255	6.89382	6.89382	6.86952	6.84527	6.79689	6.77277	6.77277	6.77277	6.77277	6.72467	6.62898	6.5814	6.5814	6.55768	6.534	6.534
	8.13879	8.0595	7.82403	7.7722	7.72054	7.69478	7.61775	7.51568	7.51568	7.46491	7.38909	7.3639	7.3639	7.31367	7.31367	7.26361	7.21373	7.13924	7.13924	7.13924	7.0898	7.06515	7.04054	7.01597	7.01597	6.99145	6.91816	6.89382	6.89382	6.82106	6.82106	6.82106	6.7487	6.7487	6.72467	6.72467	6.70068	6.67673	6.67673	6.65283	6.62898	6.62898	6.5814	6.55768	6.51037	6.48678	6.48678	6.43973	6.43973
	8.0595	7.90212	7.72054	7.72054	7.64338	7.59217	7.51568	7.43959	7.41432	7.38909	7.31367	7.28862	7.28862	7.26361	7.18885	7.18885	7.0898	7.06515	7.01597	7.01597	7.01597	6.94255	6.91816	6.91816	6.89382	6.89382	6.86952	6.77277	6.72467	6.70068	6.67673	6.65283	6.65283	6.65283	6.65283	6.62898	6.60517	6.60517	6.60517	6.51037	6.48678	6.48678	6.41628	6.39287	6.39287	6.3695	6.34617	6.34617	6.29966
	8.03316	7.85002	7.69478	7.66906	7.61775	7.56663	7.46491	7.38909	7.33876	7.26361	7.23864	7.23864	7.16402	7.13924	7.11449	7.06515	7.01597	7.01597	6.99145	6.99145	6.94255	6.91816	6.89382	6.89382	6.86952	6.82106	6.72467	6.65283	6.62898	6.60517	6.60517	6.60517	6.60517	6.60517	6.60517	6.60517	6.55768	6.534	6.51037	6.46324	6.46324	6.39287	6.3695	6.3695	6.34617	6.29966	6.27647	6.25332	6.25332
	7.92824	7.74635	7.64338	7.56663	7.51568	7.46491	7.43959	7.3639	7.31367	7.21373	7.16402	7.16402	7.0898	7.0898	7.0898	6.99145	6.99145	6.99145	6.94255	6.91816	6.86952	6.86952	6.84527	6.82106	6.79689	6.79689	6.70068	6.60517	6.60517	6.5814	6.5814	6.5814	6.55768	6.534	6.534	6.51037	6.51037	6.51037	6.43973	6.39287	6.39287	6.3695	6.32289	6.29966	6.25332	6.23022	6.23022	6.23022	6.23022
	7.90212	7.74635	7.64338	7.54113	7.49027	7.41432	7.38909	7.33876	7.21373	7.18885	7.11449	7.06515	7.04054	7.04054	7.04054	6.96698	6.89382	6.89382	6.86952	6.84527	6.82106	6.79689	6.79689	6.77277	6.77277	6.72467	6.62898	6.5814	6.5814	6.5814	6.55768	6.55768	6.51037	6.48678	6.48678	6.48678	6.48678	6.46324	6.3695	6.34617	6.29966	6.27647	6.27647	6.25332	6.23022	6.20716	6.18414	6.16117	6.16117
	7.87605	7.69478	7.59217	7.49027	7.38909	7.3639	7.3639	7.31367	7.18885	7.11449	7.0898	7.04054	7.04054	7.01597	7.01597	6.89382	6.86952	6.84527	6.82106	6.79689	6.79689	6.77277	6.72467	6.72467	6.65283	6.62898	6.60517	6.5814	6.55768	6.534	6.48678	6.46324	6.41628	6.41628	6.39287	6.3695	6.34617	6.34617	6.29966	6.29966	6.27647	6.23022	6.18414	6.16117	6.13825	6.13825	6.11537	6.09253	6.06973
	7.87605	7.69478	7.54113	7.46491	7.3639	7.3639	7.26361	7.26361	7.18885	7.0898	7.0898	7.01597	6.99145	6.96698	6.94255	6.84527	6.84527	6.79689	6.77277	6.77277	6.72467	6.70068	6.70068	6.67673	6.62898	6.60517	6.5814	6.55768	6.534	6.48678	6.43973	6.41628	6.3695	6.34617	6.34617	6.34617	6.34617	6.29966	6.27647	6.27647	6.20716	6.20716	6.16117	6.16117	6.09253	6.09253	6.04699	6.02428	6.00162
	7.7722	7.66906	7.46491	7.38909	7.31367	7.31367	7.23864	7.16402	7.13924	7.0898	7.04054	7.01597	6.96698	6.89382	6.79689	6.79689	6.79689	6.77277	6.70068	6.67673	6.67673	6.65283	6.60517	6.60517	6.60517	6.55768	6.55768	6.51037	6.46324	6.39287	6.39287	6.39287	6.34617	6.32289	6.29966	6.29966	6.27647	6.23022	6.23022	6.20716	6.18414	6.16117	6.13825	6.11537	6.09253	6.06973	6.02428	6.00162	6.00162
	7.74635	7.64338	7.41432	7.3639	7.28862	7.26361	7.21373	7.11449	7.06515	7.04054	7.01597	6.96698	6.96698	6.89382	6.77277	6.7487	6.72467	6.72467	6.67673	6.65283	6.65283	6.60517	6.5814	6.55768	6.534	6.534	6.48678	6.43973	6.39287	6.3695	6.34617	6.34617	6.34617	6.32289	6.27647	6.23022	6.20716	6.20716	6.18414	6.11537	6.09253	6.06973	6.06973	6.02428	6.00162	6.00162	6.00162	6.00162	5.979
	7.74635	7.56663	7.3639	7.31367	7.26361	7.21373	7.13924	7.11449	7.01597	6.99145	6.96698	6.91816	6.86952	6.79689	6.70068	6.70068	6.67673	6.67673	6.60517	6.60517	6.5814	6.5814	6.5814	6.55768	6.534	6.51037	6.46324	6.43973	6.39287	6.34617	6.32289	6.32289	6.29966	6.29966	6.25332	6.23022	6.20716	6.16117	6.13825	6.11537	6.02428	6.02428	6.00162	5.979	5.979	5.95643	5.95643	5.91142	5.88898
	7.72054	7.46491	7.31367	7.28862	7.23864	7.16402	7.11449	7.0898	6.99145	6.94255	6.91816	6.89382	6.84527	6.7487	6.67673	6.67673	6.65283	6.65283	6.5814	6.55768	6.55768	6.55768	6.534	6.534	6.51037	6.43973	6.41628	6.3695	6.3695	6.29966	6.27647	6.27647	6.25332	6.23022	6.20716	6.18414	6.11537	6.09253	6.06973	6.06973	6.02428	5.979	5.979	5.9339	5.9339	5.91142	5.88898	5.86658	5.86658
	7.69478	7.46491	7.28862	7.26361	7.18885	7.13924	7.0898	7.06515	6.94255	6.89382	6.86952	6.82106	6.79689	6.70068	6.67673	6.65283	6.62898	6.62898	6.534	6.51037	6.51037	6.51037	6.51037	6.48678	6.48678	6.41628	6.3695	6.3695	6.34617	6.27647	6.25332	6.25332	6.20716	6.20716	6.18414	6.09253	6.06973	6.06973	6.04699	6.02428	5.979	5.979	5.9339	5.91142	5.91142	5.88898	5.86658	5.84423	5.84423
	7.66906	7.43959	7.28862	7.16402	7.11449	7.11449	7.04054	7.01597	6.94255	6.84527	6.84527	6.82106	6.77277	6.67673	6.65283	6.62898	6.62898	6.5814	6.534	6.48678	6.46324	6.43973	6.43973	6.41628	6.39287	6.39287	6.34617	6.32289	6.32289	6.25332	6.23022	6.23022	6.18414	6.16117	6.11537	6.04699	6.04699	6.00162	5.979	5.979	5.95643	5.91142	5.91142	5.91142	5.84423	5.84423	5.82192	5.82192	5.77743
	7.64338	7.38909	7.23864	7.13924	7.0898	7.0898	7.01597	6.99145	6.91816	6.84527	6.79689	6.77277	6.72467	6.62898	6.62898	6.60517	6.60517	6.5814	6.51037	6.41628	6.41628	6.39287	6.39287	6.3695	6.34617	6.32289	6.29966	6.29966	6.29966	6.18414	6.16117	6.13825	6.11537	6.09253	6.06973	6.04699	6.00162	6.00162	5.95643	5.95643	5.91142	5.88898	5.88898	5.88898	5.82192	5.82192	5.77743	5.75526	5.75526
	7.61775	7.3639	7.18885	7.11449	7.0898	7.01597	6.99145	6.96698	6.86952	6.82106	6.7487	6.72467	6.65283	6.5814	6.5814	6.5814	6.55768	6.48678	6.48678	6.3695	6.3695	6.3695	6.3695	6.3695	6.32289	6.32289	6.29966	6.29966	6.20716	6.16117	6.13825	6.13825	6.09253	6.04699	6.04699	6.00162	5.979	5.979	5.95643	5.91142	5.88898	5.88898	5.84423	5.82192	5.82192	5.77743	5.77743	5.75526	5.66699
	7.54113	7.3639	7.16402	7.0898	7.04054	6.99145	6.96698	6.94255	6.82106	6.79689	6.7487	6.67673	6.65283	6.5814	6.55768	6.534	6.48678	6.46324	6.46324	6.3695	6.34617	6.34617	6.32289	6.32289	6.29966	6.27647	6.27647	6.27647	6.20716	6.11537	6.09253	6.09253	6.09253	6.00162	5.979	5.979	5.95643	5.9339	5.91142	5.86658	5.86658	5.84423	5.82192	5.79965	5.77743	5.75526	5.73313	5.66699	5.64504
	7.54113	7.3639	7.16402	7.01597	6.99145	6.96698	6.91816	6.91816	6.82106	6.7487	6.7487	6.62898	6.5814	6.55768	6.534	6.51037	6.46324	6.43973	6.41628	6.3695	6.32289	6.32289	6.29966	6.27647	6.27647	6.27647	6.25332	6.23022	6.20716	6.09253	6.09253	6.06973	6.06973	5.95643	5.95643	5.9339	5.91142	5.88898	5.86658	5.86658	5.84423	5.82192	5.77743	5.77743	5.73313	5.73313	5.68899	5.64504	5.64504
	7.43959	7.31367	7.0898	7.01597	6.99145	6.96698	6.89382	6.86952	6.77277	6.72467	6.72467	6.62898	6.51037	6.51037	6.51037	6.46324	6.43973	6.41628	6.39287	6.34617	6.32289	6.27647	6.25332	6.25332	6.23022	6.23022	6.23022	6.20716	6.20716	6.09253	6.06973	6.06973	6.02428	5.95643	5.9339	5.88898	5.88898	5.86658	5.84423	5.82192	5.77743	5.77743	5.75526	5.75526	5.71104	5.66699	5.66699	5.64504	5.60126
	7.41432	7.26361	7.06515	6.96698	6.96698	6.94255	6.86952	6.79689	6.7487	6.70068	6.70068	6.62898	6.51037	6.48678	6.46324	6.43973	6.41628	6.41628	6.39287	6.32289	6.32289	6.27647	6.23022	6.23022	6.23022	6.20716	6.20716	6.18414	6.16117	6.04699	6.04699	6.00162	5.95643	5.95643	5.88898	5.88898	5.84423	5.84423	5.82192	5.73313	5.73313	5.73313	5.71104	5.71104	5.64504	5.64504	5.62313	5.60126	5.57944
	7.41432	7.23864	7.04054	6.96698	6.91816	6.91816	6.79689	6.77277	6.72467	6.70068	6.67673	6.60517	6.48678	6.48678	6.43973	6.43973	6.39287	6.3695	6.25332	6.25332	6.23022	6.20716	6.20716	6.18414	6.18414	6.18414	6.18414	6.16117	6.06973	6.02428	6.00162	5.95643	5.9339	5.9339	5.88898	5.84423	5.82192	5.77743	5.77743	5.73313	5.71104	5.68899	5.66699	5.66699	5.64504	5.60126	5.55766	5.53592	5.51423
	7.41432	7.21373	6.99145	6.89382	6.89382	6.89382	6.77277	6.7487	6.70068	6.67673	6.65283	6.60517	6.48678	6.46324	6.41628	6.39287	6.34617	6.34617	6.25332	6.23022	6.20716	6.18414	6.13825	6.13825	6.11537	6.11537	6.11537	6.06973	6.04699	6.02428	5.95643	5.9339	5.91142	5.91142	5.86658	5.77743	5.73313	5.73313	5.71104	5.68899	5.66699	5.64504	5.62313	5.57944	5.55766	5.53592	5.53592	5.51423	5.51423
	7.38909	7.21373	6.99145	6.89382	6.86952	6.82106	6.77277	6.72467	6.70068	6.65283	6.62898	6.5814	6.43973	6.34617	6.34617	6.32289	6.29966	6.27647	6.23022	6.18414	6.16117	6.13825	6.11537	6.11537	6.11537	6.06973	6.04699	6.02428	6.00162	5.979	5.9339	5.88898	5.88898	5.86658	5.82192	5.77743	5.73313	5.66699	5.66699	5.64504	5.62313	5.60126	5.55766	5.53592	5.51423	5.51423	5.49258	5.49258	5.49258
	7.3639	7.18885	6.99145	6.89382	6.82106	6.82106	6.77277	6.67673	6.65283	6.60517	6.534	6.51037	6.41628	6.34617	6.34617	6.32289	6.27647	6.27647	6.20716	6.13825	6.13825	6.11537	6.06973	6.06973	6.06973	6.06973	6.02428	5.95643	5.95643	5.9339	5.91142	5.86658	5.86658	5.82192	5.79965	5.75526	5.71104	5.66699	5.64504	5.60126	5.57944	5.55766	5.55766	5.51423	5.49258	5.49258	5.47098	5.44942	5.4279
	7.3639	7.18885	6.96698	6.79689	6.7487	6.7487	6.7487	6.65283	6.62898	6.534	6.48678	6.46324	6.34617	6.29966	6.27647	6.25332	6.25332	6.23022	6.11537	6.11537	6.06973	6.06973	6.06973	6.06973	6.04699	6.00162	5.95643	5.91142	5.88898	5.88898	5.86658	5.84423	5.77743	5.77743	5.75526	5.71104	5.71104	5.64504	5.62313	5.53592	5.53592	5.51423	5.51423	5.44942	5.44942	5.44942	5.4279	5.40643	5.40643
	7.31367	7.18885	6.96698	6.77277	6.7487	6.72467	6.72467	6.62898	6.534	6.51037	6.46324	6.41628	6.34617	6.27647	6.25332	6.25332	6.25332	6.20716	6.09253	6.06973	6.06973	6.06973	6.06973	6.00162	6.00162	5.979	5.91142	5.88898	5.84423	5.84423	5.77743	5.75526	5.75526	5.73313	5.71104	5.68899	5.68899	5.64504	5.60126	5.53592	5.49258	5.47098	5.44942	5.4279	5.4279	5.40643	5.38501	5.38501	5.34228
	7.28862	7.0898	6.94255	6.7487	6.70068	6.70068	6.65283	6.62898	6.534	6.51037	6.43973	6.3695	6.29966	6.25332	6.23022	6.18414	6.18414	6.18414	6.06973	6.04699	6.04699	6.02428	6.00162	5.979	5.979	5.88898	5.86658	5.86658	5.84423	5.82192	5.75526	5.75526	5.73313	5.73313	5.68899	5.66699	5.66699	5.60126	5.53592	5.53592	5.44942	5.40643	5.40643	5.40643	5.38501	5.36362	5.36362	5.34228	5.32099
	7.28862	7.06515	6.89382	6.70068	6.67673	6.65283	6.62898	6.534	6.51037	6.51037	6.39287	6.3695	6.27647	6.25332	6.18414	6.16117	6.16117	6.11537	6.04699	6.04699	6.02428	6.00162	5.979	5.95643	5.9339	5.86658	5.84423	5.84423	5.84423	5.77743	5.75526	5.71104	5.71104	5.68899	5.66699	5.64504	5.60126	5.60126	5.51423	5.40643	5.38501	5.38501	5.38501	5.36362	5.34228	5.32099	5.29974	5.29974	5.29974
	7.26361	7.04054	6.86952	6.67673	6.65283	6.62898	6.5814	6.534	6.48678	6.48678	6.3695	6.34617	6.25332	6.23022	6.11537	6.11537	6.09253	6.04699	6.04699	6.02428	5.979	5.95643	5.95643	5.9339	5.86658	5.82192	5.79965	5.79965	5.75526	5.71104	5.66699	5.64504	5.64504	5.64504	5.62313	5.60126	5.57944	5.55766	5.51423	5.38501	5.38501	5.36362	5.36362	5.32099	5.29974	5.25736	5.25736	5.25736	5.25736
	7.18885	6.99145	6.84527	6.67673	6.62898	6.55768	6.55768	6.48678	6.48678	6.41628	6.3695	6.34617	6.23022	6.20716	6.09253	6.04699	6.02428	6.02428	6.02428	5.979	5.95643	5.95643	5.9339	5.9339	5.79965	5.77743	5.75526	5.71104	5.71104	5.64504	5.62313	5.62313	5.60126	5.60126	5.57944	5.55766	5.51423	5.49258	5.44942	5.38501	5.32099	5.29974	5.25736	5.25736	5.25736	5.23624	5.23624	5.23624	5.23624
	7.13924	6.96698	6.7487	6.62898	6.62898	6.51037	6.51037	6.46324	6.43973	6.39287	6.32289	6.29966	6.18414	6.13825	6.09253	6.02428	6.00162	5.979	5.979	5.9339	5.91142	5.91142	5.86658	5.84423	5.75526	5.75526	5.71104	5.68899	5.68899	5.64504	5.60126	5.57944	5.55766	5.55766	5.55766	5.51423	5.49258	5.47098	5.44942	5.34228	5.27853	5.23624	5.23624	5.23624	5.23624	5.21517	5.19414	5.19414	5.17315
	7.11449	6.91816	6.70068	6.60517	6.5814	6.46324	6.41628	6.41628	6.39287	6.32289	6.25332	6.23022	6.18414	6.04699	6.00162	5.979	5.979	5.95643	5.9339	5.91142	5.88898	5.86658	5.84423	5.84423	5.68899	5.66699	5.66699	5.64504	5.62313	5.57944	5.57944	5.55766	5.53592	5.51423	5.51423	5.47098	5.44942	5.4279	5.38501	5.23624	5.21517	5.21517	5.21517	5.19414	5.19414	5.19414	5.17315	5.15221	5.08964
	7.0898	6.89382	6.70068	6.5814	6.55768	6.46324	6.3695	6.3695	6.3695	6.32289	6.23022	6.23022	6.11537	6.04699	5.979	5.9339	5.91142	5.88898	5.88898	5.84423	5.82192	5.82192	5.79965	5.73313	5.66699	5.64504	5.60126	5.57944	5.55766	5.53592	5.51423	5.51423	5.47098	5.47098	5.38501	5.38501	5.38501	5.38501	5.36362	5.19414	5.17315	5.15221	5.15221	5.15221	5.15221	5.13131	5.13131	5.08964	5.04814
	7.0898	6.86952	6.65283	6.55768	6.43973	6.3695	6.34617	6.32289	6.29966	6.29966	6.16117	6.11537	6.02428	6.00162	5.88898	5.86658	5.84423	5.82192	5.82192	5.79965	5.79965	5.77743	5.73313	5.73313	5.64504	5.60126	5.60126	5.53592	5.51423	5.4279	5.4279	5.40643	5.38501	5.38501	5.36362	5.34228	5.34228	5.34228	5.32099	5.17315	5.15221	5.13131	5.13131	5.13131	5.08964	5.08964	5.08964	5.04814	5.00683
	6.96698	6.84527	6.51037	6.46324	6.41628	6.3695	6.29966	6.27647	6.18414	6.18414	6.11537	6.02428	6.00162	5.979	5.84423	5.82192	5.82192	5.77743	5.77743	5.75526	5.75526	5.71104	5.64504	5.64504	5.62313	5.60126	5.55766	5.49258	5.47098	5.36362	5.36362	5.36362	5.34228	5.32099	5.29974	5.29974	5.27853	5.25736	5.19414	5.15221	5.11045	5.08964	5.08964	5.08964	5.04814	5.04814	4.96568	4.96568	4.94518
	6.82106	6.7487	6.39287	6.39287	6.27647	6.25332	6.23022	6.18414	6.18414	6.16117	5.95643	5.95643	5.88898	5.82192	5.79965	5.73313	5.73313	5.73313	5.71104	5.71104	5.66699	5.66699	5.55766	5.53592	5.51423	5.47098	5.47098	5.44942	5.44942	5.34228	5.29974	5.27853	5.27853	5.25736	5.25736	5.23624	5.23624	5.23624	5.19414	5.06887	5.04814	5.04814	5.02746	4.98623	4.96568	4.94518	4.92472	4.9043	4.9043
	6.7487	6.62898	6.3695	6.25332	6.25332	6.25332	6.16117	6.11537	6.09253	6.00162	5.91142	5.91142	5.79965	5.77743	5.73313	5.66699	5.66699	5.64504	5.64504	5.60126	5.57944	5.55766	5.44942	5.44942	5.4279	5.4279	5.38501	5.38501	5.29974	5.27853	5.23624	5.21517	5.21517	5.21517	5.19414	5.19414	5.19414	5.15221	5.11045	5.02746	4.98623	4.98623	4.96568	4.94518	4.9043	4.9043	4.88393	4.84331	4.7626
	6.72467	6.41628	6.3695	6.25332	6.18414	6.13825	6.06973	6.04699	5.95643	5.86658	5.84423	5.82192	5.77743	5.75526	5.73313	5.62313	5.60126	5.57944	5.57944	5.55766	5.49258	5.47098	5.4279	5.40643	5.36362	5.34228	5.34228	5.27853	5.25736	5.25736	5.21517	5.19414	5.17315	5.15221	5.15221	5.08964	5.08964	4.98623	4.96568	4.94518	4.94518	4.88393	4.8636	4.84331	4.84331	4.82307	4.80287	4.80287	4.72251
	6.72467	6.39287	6.25332	6.20716	6.16117	6.06973	6.02428	5.9339	5.9339	5.84423	5.82192	5.82192	5.71104	5.68899	5.60126	5.55766	5.53592	5.51423	5.44942	5.44942	5.40643	5.38501	5.34228	5.34228	5.32099	5.32099	5.32099	5.25736	5.17315	5.17315	5.17315	5.15221	5.11045	5.06887	5.06887	4.96568	4.92472	4.92472	4.9043	4.88393	4.88393	4.84331	4.82307	4.80287	4.80287	4.78272	4.72251	4.62305	4.60329
	6.72467	6.34617	6.23022	6.13825	6.13825	6.04699	5.95643	5.91142	5.86658	5.79965	5.79965	5.73313	5.66699	5.64504	5.53592	5.51423	5.49258	5.44942	5.44942	5.40643	5.34228	5.32099	5.32099	5.32099	5.29974	5.27853	5.25736	5.25736	5.13131	5.06887	5.06887	5.06887	5.04814	5.04814	4.92472	4.9043	4.9043	4.82307	4.82307	4.82307	4.80287	4.78272	4.78272	4.70253	4.6826	4.66271	4.66271	4.62305	4.5639
	6.62898	6.29966	6.23022	6.13825	5.979	5.979	5.91142	5.88898	5.82192	5.71104	5.71104	5.68899	5.62313	5.53592	5.49258	5.47098	5.47098	5.40643	5.34228	5.32099	5.29974	5.29974	5.27853	5.27853	5.23624	5.21517	5.19414	5.13131	5.08964	5.06887	5.04814	5.04814	5.02746	5.02746	4.9043	4.84331	4.82307	4.82307	4.82307	4.78272	4.78272	4.74254	4.72251	4.6826	4.66271	4.66271	4.66271	4.54427	4.54427
	6.60517	6.27647	6.20716	6.02428	5.979	5.95643	5.86658	5.84423	5.82192	5.68899	5.64504	5.57944	5.53592	5.47098	5.4279	5.4279	5.40643	5.32099	5.27853	5.27853	5.25736	5.25736	5.23624	5.21517	5.21517	5.17315	5.06887	5.04814	5.00683	5.00683	5.00683	4.98623	4.92472	4.88393	4.8636	4.78272	4.7626	4.74254	4.74254	4.74254	4.72251	4.72251	4.6826	4.6826	4.62305	4.60329	4.58358	4.50514	4.42741
	6.51037	6.27647	6.02428	6.00162	5.9339	5.82192	5.82192	5.79965	5.73313	5.66699	5.60126	5.55766	5.51423	5.4279	5.38501	5.38501	5.34228	5.29974	5.23624	5.23624	5.19414	5.19414	5.17315	5.15221	5.13131	5.13131	4.98623	4.98623	4.98623	4.94518	4.94518	4.92472	4.8636	4.8636	4.84331	4.74254	4.72251	4.72251	4.72251	4.70253	4.6826	4.66271	4.66271	4.62305	4.60329	4.58358	4.48564	4.40809	4.33123
	6.46324	6.25332	5.979	5.979	5.91142	5.77743	5.75526	5.66699	5.64504	5.62313	5.55766	5.51423	5.51423	5.36362	5.36362	5.32099	5.32099	5.27853	5.19414	5.17315	5.13131	5.13131	5.11045	5.08964	5.06887	4.98623	4.96568	4.96568	4.94518	4.92472	4.92472	4.88393	4.82307	4.80287	4.78272	4.74254	4.72251	4.70253	4.66271	4.66271	4.60329	4.60329	4.60329	4.54427	4.52469	4.52469	4.44678	4.36957	4.31212
	6.43973	6.20716	5.9339	5.9339	5.86658	5.75526	5.73313	5.64504	5.62313	5.62313	5.47098	5.47098	5.4279	5.32099	5.29974	5.27853	5.27853	5.25736	5.17315	5.13131	5.11045	5.08964	5.06887	5.06887	5.04814	4.94518	4.9043	4.9043	4.9043	4.8636	4.82307	4.78272	4.78272	4.74254	4.74254	4.70253	4.70253	4.66271	4.58358	4.52469	4.52469	4.50514	4.50514	4.44678	4.44678	4.44678	4.40809	4.31212	4.29306
	6.3695	6.16117	5.88898	5.84423	5.71104	5.68899	5.68899	5.64504	5.53592	5.51423	5.4279	5.40643	5.38501	5.27853	5.27853	5.25736	5.21517	5.15221	5.15221	5.11045	5.06887	5.06887	5.02746	4.94518	4.92472	4.88393	4.84331	4.82307	4.80287	4.80287	4.78272	4.7626	4.72251	4.72251	4.6826	4.66271	4.64286	4.64286	4.5639	4.48564	4.44678	4.42741	4.40809	4.38881	4.36957	4.36957	4.33123	4.27404	4.25507
	6.34617	6.13825	5.82192	5.82192	5.71104	5.68899	5.64504	5.60126	5.44942	5.4279	5.38501	5.38501	5.36362	5.25736	5.21517	5.21517	5.19414	5.13131	5.11045	5.11045	5.00683	4.96568	4.92472	4.9043	4.88393	4.82307	4.80287	4.78272	4.7626	4.7626	4.74254	4.74254	4.70253	4.66271	4.64286	4.64286	4.52469	4.50514	4.50514	4.46619	4.42741	4.40809	4.36957	4.35038	4.35038	4.27404	4.25507	4.23613	4.1984
	6.29966	6.09253	5.82192	5.75526	5.64504	5.64504	5.60126	5.57944	5.44942	5.40643	5.38501	5.32099	5.29974	5.21517	5.19414	5.17315	5.13131	5.11045	5.11045	5.04814	4.98623	4.8636	4.8636	4.82307	4.82307	4.82307	4.7626	4.7626	4.72251	4.72251	4.6826	4.66271	4.64286	4.62305	4.60329	4.60329	4.46619	4.44678	4.44678	4.44678	4.38881	4.35038	4.35038	4.33123	4.31212	4.25507	4.23613	4.21725	4.1796
	6.23022	6.04699	5.73313	5.68899	5.62313	5.62313	5.57944	5.53592	5.4279	5.34228	5.32099	5.27853	5.21517	5.13131	5.13131	5.08964	5.08964	5.06887	5.04814	4.94518	4.84331	4.82307	4.82307	4.80287	4.80287	4.80287	4.74254	4.70253	4.70253	4.70253	4.64286	4.60329	4.60329	4.60329	4.58358	4.54427	4.46619	4.42741	4.38881	4.35038	4.31212	4.31212	4.31212	4.25507	4.1796	4.16084	4.14213	4.12346	4.08625
	6.20716	6.04699	5.68899	5.64504	5.60126	5.57944	5.55766	5.47098	5.40643	5.32099	5.29974	5.23624	5.17315	5.13131	5.08964	5.06887	5.04814	5.04814	5.00683	4.88393	4.78272	4.78272	4.78272	4.7626	4.74254	4.70253	4.6826	4.6826	4.66271	4.66271	4.64286	4.58358	4.5639	4.5639	4.52469	4.48564	4.36957	4.33123	4.29306	4.29306	4.25507	4.25507	4.23613	4.1796	4.16084	4.14213	4.12346	4.10483	4.03076
	6.18414	5.9339	5.66699	5.62313	5.55766	5.51423	5.47098	5.44942	5.38501	5.29974	5.23624	5.21517	5.17315	5.11045	5.04814	5.02746	5.00683	4.98623	4.94518	4.88393	4.78272	4.74254	4.74254	4.70253	4.6826	4.6826	4.66271	4.60329	4.58358	4.58358	4.58358	4.5639	4.54427	4.52469	4.50514	4.42741	4.33123	4.31212	4.27404	4.27404	4.21725	4.1796	4.16084	4.14213	4.06771	4.06771	4.06771	4.06771	3.99399
	6.13825	5.9339	5.62313	5.55766	5.55766	5.44942	5.44942	5.44942	5.29974	5.29974	5.19414	5.19414	5.11045	5.04814	5.04814	4.98623	4.96568	4.92472	4.74254	4.74254	4.72251	4.72251	4.66271	4.66271	4.62305	4.62305	4.58358	4.5639	4.5639	4.54427	4.54427	4.54427	4.54427	4.42741	4.38881	4.38881	4.33123	4.29306	4.23613	4.21725	4.1796	4.1796	4.12346	4.08625	4.06771	4.04921	4.01235	3.99399	3.97566
	6.04699	5.91142	5.57944	5.51423	5.47098	5.44942	5.36362	5.34228	5.27853	5.25736	5.13131	5.13131	5.08964	5.02746	5.00683	4.98623	4.96568	4.92472	4.74254	4.72251	4.70253	4.60329	4.60329	4.60329	4.60329	4.58358	4.5639	4.54427	4.52469	4.52469	4.52469	4.48564	4.46619	4.38881	4.36957	4.33123	4.31212	4.25507	4.21725	4.21725	4.1796	4.16084	4.10483	4.04921	4.01235	3.99399	3.97566	3.92096	3.8847
	6.04699	5.91142	5.51423	5.47098	5.4279	5.4279	5.32099	5.27853	5.25736	5.21517	5.13131	5.11045	5.06887	5.02746	4.98623	4.96568	4.92472	4.84331	4.72251	4.6826	4.6826	4.60329	4.58358	4.58358	4.5639	4.5639	4.52469	4.52469	4.52469	4.50514	4.48564	4.46619	4.42741	4.31212	4.27404	4.27404	4.23613	4.16084	4.16084	4.14213	4.08625	4.08625	4.03076	3.99399	3.97566	3.97566	3.97566	3.84862	3.84862
	5.979	5.88898	5.49258	5.44942	5.36362	5.27853	5.27853	5.25736	5.23624	5.19414	5.08964	5.04814	5.00683	4.98623	4.96568	4.8636	4.82307	4.80287	4.70253	4.64286	4.60329	4.5639	4.5639	4.54427	4.54427	4.52469	4.50514	4.46619	4.44678	4.42741	4.40809	4.40809	4.40809	4.27404	4.27404	4.25507	4.21725	4.14213	4.12346	4.08625	4.06771	4.03076	4.03076	3.99399	3.95738	3.90281	3.84862	3.84862	3.77698
	5.9339	5.86658	5.49258	5.40643	5.32099	5.25736	5.23624	5.23624	5.19414	5.15221	5.06887	5.00683	4.96568	4.92472	4.9043	4.82307	4.80287	4.74254	4.70253	4.62305	4.58358	4.5639	4.52469	4.52469	4.50514	4.48564	4.44678	4.42741	4.40809	4.38881	4.36957	4.35038	4.35038	4.27404	4.27404	4.25507	4.1984	4.12346	4.08625	4.06771	4.04921	4.01235	3.97566	3.93915	3.86664	3.83065	3.83065	3.81272	3.75918
	5.91142	5.82192	5.44942	5.40643	5.27853	5.25736	5.21517	5.19414	5.19414	5.11045	4.98623	4.98623	4.94518	4.9043	4.8636	4.80287	4.7626	4.72251	4.6826	4.58358	4.5639	4.50514	4.48564	4.48564	4.44678	4.40809	4.40809	4.38881	4.36957	4.36957	4.35038	4.31212	4.29306	4.25507	4.23613	4.1984	4.1984	4.10483	4.08625	3.97566	3.97566	3.95738	3.93915	3.93915	3.83065	3.79483	3.75918	3.74142	3.74142
	5.86658	5.79965	5.44942	5.36362	5.25736	5.21517	5.19414	5.19414	5.17315	5.06887	4.98623	4.96568	4.94518	4.8636	4.78272	4.7626	4.74254	4.70253	4.66271	4.5639	4.52469	4.48564	4.46619	4.44678	4.40809	4.38881	4.36957	4.35038	4.35038	4.33123	4.29306	4.25507	4.1984	4.1796	4.1796	4.16084	4.04921	4.03076	4.03076	3.95738	3.93915	3.92096	3.8847	3.81272	3.75918	3.75918	3.72371	3.70604	3.67083
	5.86658	5.71104	5.32099	5.32099	5.17315	5.15221	5.13131	5.13131	5.13131	4.98623	4.96568	4.92472	4.9043	4.7626	4.74254	4.72251	4.70253	4.62305	4.60329	4.48564	4.46619	4.44678	4.38881	4.36957	4.36957	4.35038	4.35038	4.33123	4.31212	4.27404	4.21725	4.1984	4.1796	4.16084	4.08625	4.04921	4.04921	4.03076	3.97566	3.93915	3.92096	3.8847	3.86664	3.79483	3.74142	3.65328	3.63579	3.61833	3.60092
	5.73313	5.68899	5.32099	5.32099	5.13131	5.11045	5.06887	5.04814	5.04814	4.92472	4.92472	4.88393	4.88393	4.7626	4.72251	4.72251	4.6826	4.60329	4.44678	4.44678	4.42741	4.36957	4.33123	4.29306	4.29306	4.29306	4.29306	4.27404	4.21725	4.1796	4.1796	4.16084	4.16084	4.14213	4.03076	4.03076	3.97566	3.97566	3.95738	3.90281	3.84862	3.83065	3.79483	3.74142	3.65328	3.61833	3.58355	3.5317	3.51451
	5.71104	5.68899	5.29974	5.25736	5.06887	5.06887	5.04814	5.04814	5.02746	4.88393	4.8636	4.8636	4.82307	4.70253	4.6826	4.66271	4.62305	4.48564	4.42741	4.42741	4.40809	4.31212	4.29306	4.27404	4.27404	4.27404	4.25507	4.16084	4.14213	4.14213	4.14213	4.12346	4.01235	4.01235	3.99399	3.97566	3.95738	3.8847	3.83065	3.81272	3.81272	3.79483	3.70604	3.67083	3.58355	3.56622	3.5317	3.48025	3.46318
	5.68899	5.68899	5.25736	5.23624	5.04814	5.02746	5.02746	5.00683	4.92472	4.82307	4.82307	4.80287	4.80287	4.6826	4.66271	4.64286	4.54427	4.42741	4.40809	4.40809	4.29306	4.27404	4.25507	4.1984	4.1984	4.1796	4.1796	4.14213	4.12346	4.12346	4.12346	4.04921	4.01235	4.01235	3.97566	3.93915	3.86664	3.81272	3.79483	3.79483	3.79483	3.77698	3.65328	3.56622	3.56622	3.54894	3.5317	3.44616	3.42918
	5.68899	5.64504	5.21517	5.17315	5.00683	5.00683	5.00683	4.9043	4.80287	4.78272	4.7626	4.7626	4.74254	4.66271	4.62305	4.60329	4.50514	4.35038	4.33123	4.33123	4.23613	4.21725	4.1796	4.14213	4.12346	4.12346	4.08625	4.06771	4.04921	4.03076	4.01235	4.01235	3.97566	3.97566	3.95738	3.84862	3.81272	3.75918	3.75918	3.74142	3.74142	3.68841	3.61833	3.48025	3.48025	3.46318	3.39535	3.39535	3.39535
	5.64504	5.55766	5.13131	5.13131	4.98623	4.98623	4.9043	4.88393	4.78272	4.7626	4.74254	4.72251	4.70253	4.62305	4.5639	4.54427	4.48564	4.31212	4.31212	4.29306	4.16084	4.12346	4.10483	4.10483	4.08625	4.04921	4.04921	4.04921	4.03076	4.01235	3.99399	3.95738	3.8847	3.8847	3.86664	3.81272	3.79483	3.75918	3.74142	3.72371	3.70604	3.67083	3.48025	3.46318	3.44616	3.39535	3.3785	3.34493	3.3282
	5.51423	5.49258	5.08964	5.08964	4.96568	4.96568	4.88393	4.88393	4.6826	4.66271	4.66271	4.66271	4.64286	4.5639	4.48564	4.46619	4.44678	4.29306	4.27404	4.25507	4.12346	4.08625	4.06771	4.03076	4.03076	4.01235	3.99399	3.99399	3.97566	3.95738	3.8847	3.86664	3.84862	3.81272	3.81272	3.75918	3.75918	3.72371	3.72371	3.70604	3.67083	3.63579	3.44616	3.42918	3.39535	3.3282	3.29489	3.2783	3.2783
	5.49258	5.49258	5.08964	5.08964	4.8636	4.80287	4.80287	4.78272	4.62305	4.62305	4.60329	4.58358	4.58358	4.46619	4.46619	4.44678	4.42741	4.29306	4.23613	4.16084	4.06771	4.03076	3.97566	3.97566	3.97566	3.92096	3.90281	3.8847	3.8847	3.86664	3.84862	3.83065	3.81272	3.77698	3.77698	3.74142	3.67083	3.63579	3.61833	3.58355	3.56622	3.56622	3.44616	3.41224	3.31153	3.2783	3.26175	3.26175	3.26175
	5.47098	5.4279	5.04814	4.98623	4.78272	4.74254	4.74254	4.74254	4.60329	4.5639	4.54427	4.52469	4.50514	4.44678	4.42741	4.42741	4.36957	4.25507	4.14213	4.08625	4.03076	4.01235	3.95738	3.92096	3.8847	3.86664	3.86664	3.86664	3.86664	3.84862	3.81272	3.79483	3.77698	3.77698	3.77698	3.65328	3.61833	3.54894	3.54894	3.5317	3.5317	3.51451	3.41224	3.39535	3.29489	3.26175	3.24525	3.19599	3.19599
	5.40643	5.29974	5.00683	4.88393	4.74254	4.72251	4.66271	4.66271	4.50514	4.48564	4.48564	4.46619	4.40809	4.40809	4.38881	4.31212	4.21725	4.1984	4.04921	4.04921	4.01235	3.95738	3.8847	3.86664	3.84862	3.83065	3.83065	3.83065	3.83065	3.79483	3.77698	3.75918	3.68841	3.68841	3.68841	3.60092	3.58355	3.5317	3.51451	3.49736	3.48025	3.44616	3.39535	3.31153	3.17965	3.17965	3.16336	3.14711	3.11475
	5.38501	5.27853	5.00683	4.8636	4.6826	4.66271	4.60329	4.60329	4.48564	4.40809	4.40809	4.38881	4.38881	4.36957	4.35038	4.29306	4.1984	4.16084	4.03076	4.03076	3.86664	3.83065	3.81272	3.81272	3.81272	3.77698	3.77698	3.75918	3.67083	3.67083	3.67083	3.65328	3.63579	3.5317	3.51451	3.51451	3.51451	3.51451	3.49736	3.49736	3.44616	3.44616	3.24525	3.19599	3.17965	3.06652	3.05053	3.01868	3.01868
	5.27853	5.23624	4.8636	4.78272	4.64286	4.58358	4.54427	4.52469	4.38881	4.36957	4.35038	4.35038	4.29306	4.25507	4.1984	4.16084	4.12346	4.01235	3.95738	3.90281	3.79483	3.77698	3.75918	3.75918	3.72371	3.68841	3.67083	3.63579	3.60092	3.58355	3.5317	3.5317	3.51451	3.49736	3.49736	3.48025	3.44616	3.44616	3.44616	3.41224	3.3282	3.26175	3.21236	3.19599	3.17965	3.00282	2.987	2.97122	2.95549
	5.19414	5.06887	4.74254	4.62305	4.52469	4.52469	4.50514	4.42741	4.25507	4.21725	4.1984	4.1984	4.1796	4.14213	4.12346	4.06771	4.06771	3.93915	3.83065	3.77698	3.70604	3.67083	3.67083	3.63579	3.61833	3.60092	3.60092	3.60092	3.56622	3.5317	3.51451	3.42918	3.42918	3.42918	3.36169	3.36169	3.31153	3.31153	3.29489	3.2783	3.26175	3.26175	3.13091	3.11475	3.08255	2.987	2.95549	2.90855	2.87747
	5.02746	4.84331	4.58358	4.40809	4.38881	4.36957	4.29306	4.16084	4.12346	4.12346	4.12346	4.04921	3.99399	3.99399	3.95738	3.8847	3.86664	3.75918	3.74142	3.72371	3.61833	3.60092	3.56622	3.54894	3.5317	3.49736	3.49736	3.42918	3.41224	3.3785	3.3785	3.3785	3.34493	3.31153	3.2783	3.26175	3.26175	3.24525	3.24525	3.22878	3.19599	3.17965	3.03458	3.01868	3.00282	2.84656	2.81582	2.80051	2.78525
	4.78272	4.66271	4.36957	4.29306	4.23613	4.14213	4.06771	4.01235	4.01235	3.95738	3.95738	3.93915	3.90281	3.8847	3.83065	3.81272	3.81272	3.70604	3.67083	3.67083	3.49736	3.48025	3.42918	3.41224	3.41224	3.3785	3.3282	3.3282	3.31153	3.29489	3.2783	3.26175	3.26175	3.26175	3.26175	3.26175	3.21236	3.16336	3.14711	3.08255	3.05053	3.05053	3.00282	2.987	2.89298	2.77003	2.75485	2.75485	2.73972
	4.60329	4.50514	4.33123	4.1984	4.14213	3.99399	3.97566	3.8847	3.83065	3.83065	3.81272	3.79483	3.79483	3.75918	3.72371	3.65328	3.5317	3.49736	3.46318	3.44616	3.3785	3.3282	3.3282	3.2783	3.22878	3.22878	3.22878	3.21236	3.16336	3.16336	3.16336	3.09863	3.03458	3.03458	3.03458	3.00282	2.987	2.92415	2.92415	2.90855	2.87747	2.87747	2.84656	2.84656	2.69457	2.63496	2.63496	2.62017	2.57604
	4.54427	4.40809	4.06771	4.06771	4.04921	3.90281	3.84862	3.84862	3.77698	3.77698	3.75918	3.70604	3.70604	3.61833	3.54894	3.49736	3.41224	3.39535	3.3282	3.3282	3.29489	3.24525	3.22878	3.22878	3.21236	3.19599	3.19599	3.16336	3.13091	3.09863	3.06652	3.01868	2.97122	2.97122	2.92415	2.92415	2.89298	2.84656	2.83116	2.73972	2.69457	2.69457	2.66468	2.59071	2.56142	2.54684	2.54684	2.50335	2.47456
	4.48564	4.31212	4.06771	3.95738	3.93915	3.8847	3.75918	3.65328	3.65328	3.54894	3.54894	3.5317	3.5317	3.46318	3.46318	3.3785	3.3785	3.29489	3.11475	3.11475	3.11475	3.09863	3.05053	3.05053	3.00282	3.00282	2.92415	2.90855	2.90855	2.90855	2.87747	2.87747	2.86199	2.80051	2.78525	2.69457	2.66468	2.6498	2.62017	2.56142	2.56142	2.50335	2.47456	2.44595	2.43171	2.40335	2.37516	2.36113	2.34714
	4.35038	4.31212	3.97566	3.92096	3.84862	3.75918	3.70604	3.60092	3.56622	3.54894	3.51451	3.46318	3.46318	3.34493	3.3282	3.3282	3.29489	3.26175	3.09863	3.03458	2.987	2.97122	2.95549	2.89298	2.89298	2.86199	2.84656	2.80051	2.78525	2.78525	2.72462	2.72462	2.6498	2.6498	2.63496	2.63496	2.56142	2.5323	2.5178	2.50335	2.44595	2.34714	2.31929	2.30543	2.29161	2.23675	2.22314	2.20957	2.18256
	4.1796	4.06771	3.81272	3.77698	3.72371	3.56622	3.56622	3.46318	3.41224	3.39535	3.36169	3.31153	3.24525	3.24525	3.22878	3.19599	3.17965	3.14711	2.95549	2.9398	2.9398	2.87747	2.86199	2.84656	2.83116	2.78525	2.78525	2.77003	2.72462	2.6498	2.6498	2.63496	2.62017	2.56142	2.5178	2.50335	2.48893	2.46024	2.41751	2.37516	2.36113	2.31929	2.26409	2.2504	2.19604	2.16912	2.15572	2.15572	2.10254
	4.06771	4.01235	3.77698	3.74142	3.51451	3.42918	3.41224	3.34493	3.31153	3.26175	3.24525	3.24525	3.22878	3.21236	3.14711	3.08255	2.987	2.95549	2.83116	2.83116	2.75485	2.73972	2.72462	2.70957	2.69457	2.6796	2.6498	2.56142	2.54684	2.5178	2.48893	2.46024	2.43171	2.41751	2.40335	2.37516	2.37516	2.33319	2.23675	2.22314	2.20957	2.14236	2.0762	2.02403	2.02403	1.9982	1.97253	1.92169	1.90909
	3.93915	3.81272	3.51451	3.49736	3.42918	3.3282	3.26175	3.17965	3.14711	3.03458	3.01868	2.97122	2.97122	2.9398	2.9398	2.92415	2.78525	2.77003	2.70957	2.60542	2.59071	2.56142	2.5323	2.50335	2.47456	2.43171	2.43171	2.41751	2.40335	2.33319	2.29161	2.27783	2.23675	2.19604	2.12905	2.12905	2.11577	2.0631	2.0631	2.05003	2.05003	1.93434	1.84669	1.83433	1.80974	1.79751	1.76107	1.73698	1.725
[truncated: 32 more columns]

## Sheet: Fig.S3c
significant	0.992989
no-significant	0.00701113
