# Supplementary material for: Multi-dimensional social relationships shape social attention in monkeys
Source: eLife. 2025 Mar 7;14:RP104460. doi: 10.7554/eLife.104460 (PMC11888598; doi:10.7554/eLife.104460)
Supplement: Figure 3—figure supplement 3—source data 1. [file elife-104460-fig3-figsupp3-data1.xlsx]

## Sheet: Fig.S4a
scatter point	social engagement score	distractor bias (ms)		fitted curve	social engagement score	distractor bias (ms)	errorbar
	-2	33.6429			-3	70.6615	6.37097
	-2	11.95			-2.99399	70.5695	6.36247
	-2	49.6591			-2.98799	70.4774	6.35398
	-2	38.2619			-2.98198	70.3854	6.34549
	-2	69.1346			-2.97598	70.2933	6.337
	-2	79.4444			-2.96997	70.2013	6.32853
	-2	86.8333			-2.96396	70.1093	6.32006
	-2	86.6889			-2.95796	70.0172	6.31159
	-2	85.9565			-2.95195	69.9252	6.30313
	-2	79.7241			-2.94595	69.8331	6.29468
	-2	81.1739			-2.93994	69.7411	6.28623
	-2	78.9688			-2.93393	69.6491	6.27779
	-2	64.7143			-2.92793	69.557	6.26935
	-2	45.5714			-2.92192	69.465	6.26092
	-2	57.1316			-2.91592	69.373	6.25249
	-2	64.4571			-2.90991	69.2809	6.24408
	-2	70.5			-2.9039	69.1889	6.23566
	-2	97.5532			-2.8979	69.0968	6.22726
	-2	77.0286			-2.89189	69.0048	6.21886
	-2	94.5641			-2.88589	68.9128	6.21046
	-2	85.0816			-2.87988	68.8207	6.20207
	-2	86.5333			-2.87387	68.7287	6.19369
	-2	109.727			-2.86787	68.6367	6.18532
	-2	76.375			-2.86186	68.5446	6.17695
	-2	40.4103			-2.85586	68.4526	6.16858
	-2	26.2453			-2.84985	68.3605	6.16023
	-2	62.8235			-2.84384	68.2685	6.15188
	-2	71.4865			-2.83784	68.1765	6.14353
	-2	64.4364			-2.83183	68.0844	6.13519
	-2	85.5833			-2.82583	67.9924	6.12686
	-2	62.3421			-2.81982	67.9003	6.11854
	-2	89			-2.81381	67.8083	6.11022
	-2	107.143			-2.80781	67.7163	6.10191
	-2	119.458			-2.8018	67.6242	6.0936
	-2	45.7692			-2.7958	67.5322	6.0853
	-2	102.5			-2.78979	67.4402	6.07701
	-2	35.8036			-2.78378	67.3481	6.06872
	-2	64.2321			-2.77778	67.2561	6.06044
	-2	59.3509			-2.77177	67.164	6.05217
	-2	58.8286			-2.76577	67.072	6.0439
	-2	22.3284			-2.75976	66.98	6.03564
	-2	42.5972			-2.75375	66.8879	6.02739
	-2	50.1364			-2.74775	66.7959	6.01914
	-2	63.4792			-2.74174	66.7038	6.0109
	-2	47.1045			-2.73574	66.6118	6.00267
	-2	24.3571			-2.72973	66.5198	5.99444
	-2	33.16			-2.72372	66.4277	5.98622
	-2	40.6889			-2.71772	66.3357	5.97801
	-2	19.6182			-2.71171	66.2437	5.9698
	-2	31.2456			-2.70571	66.1516	5.9616
	-2	31.6721			-2.6997	66.0596	5.95341
	-2	54.75			-2.69369	65.9675	5.94523
	-2	12.1452			-2.68769	65.8755	5.93705
	-2	-2.15789			-2.68168	65.7835	5.92888
	-2	19.037			-2.67568	65.6914	5.92071
	-2	9.97872			-2.66967	65.5994	5.91255
	-2	38.6522			-2.66366	65.5074	5.9044
	-2	23.6765			-2.65766	65.4153	5.89626
	-2	6.42857			-2.65165	65.3233	5.88813
	-2	31.6042			-2.64565	65.2312	5.88
	-2	63.5345			-2.63964	65.1392	5.87188
	-2	64.1148			-2.63363	65.0472	5.86376
	-2	55.9828			-2.62763	64.9551	5.85565
	-2	54.0667			-2.62162	64.8631	5.84756
	-2	65.3824			-2.61562	64.771	5.83946
	-2	64.44			-2.60961	64.679	5.83138
	-2	71.4615			-2.6036	64.587	5.8233
	-2	39.7551			-2.5976	64.4949	5.81523
	-2	48.3651			-2.59159	64.4029	5.80717
	-2	54.9394			-2.58559	64.3109	5.79911
	-2	36.4286			-2.57958	64.2188	5.79107
	-2	55.9773			-2.57357	64.1268	5.78303
	1	5.46667			-2.56757	64.0347	5.77499
	1	-27.1667			-2.56156	63.9427	5.76697
	1	-7.33929			-2.55556	63.8507	5.75895
	1	-8.18605			-2.54955	63.7586	5.75094
	1	-4.57627			-2.54354	63.6666	5.74294
	1	5.65			-2.53754	63.5745	5.73495
	1	3.40625			-2.53153	63.4825	5.72696
	1	-2.58974			-2.52553	63.3905	5.71898
	1	37.25			-2.51952	63.2984	5.71101
	1	1.84211			-2.51351	63.2064	5.70305
	1	4.39535			-2.50751	63.1144	5.6951
	1	13.5484			-2.5015	63.0223	5.68715
	1	10.8605			-2.4955	62.9303	5.67921
	1	-17.7679			-2.48949	62.8382	5.67128
	1	-7.38182			-2.48348	62.7462	5.66336
	1	-1.25			-2.47748	62.6542	5.65544
	1	2.85965			-2.47147	62.5621	5.64754
	1	-3.27273			-2.46547	62.4701	5.63964
	1	-4.32258			-2.45946	62.3781	5.63175
	1	-16.225			-2.45345	62.286	5.62387
	1	5.46154			-2.44745	62.194	5.61599
	1	-12.3125			-2.44144	62.1019	5.60813
	1	9.65306			-2.43544	62.0099	5.60027
	1	-18.5556			-2.42943	61.9179	5.59242
	1	19.6905			-2.42342	61.8258	5.58458
	1	0.188679			-2.41742	61.7338	5.57675
	1	2.92727			-2.41141	61.6417	5.56893
	1	16.8372			-2.40541	61.5497	5.56111
	1	8.40323			-2.3994	61.4577	5.5533
	1	22.5862			-2.39339	61.3656	5.54551
	1	10.3438			-2.38739	61.2736	5.53772
	1	15.7179			-2.38138	61.1816	5.52994
	1	9.16667			-2.37538	61.0895	5.52216
	1	-14.825			-2.36937	60.9975	5.5144
	1	8.4			-2.36336	60.9054	5.50665
	1	26.3077			-2.35736	60.8134	5.4989
	3	-61.5			-2.35135	60.7214	5.49116
	3	-64.4062			-2.34535	60.6293	5.48344
	3	-41.3778			-2.33934	60.5373	5.47572
	3	-20.1633			-2.33333	60.4452	5.46801
	3	-22.2698			-2.32733	60.3532	5.46031
	3	-23.7385			-2.32132	60.2612	5.45261
	3	-26.5686			-2.31532	60.1691	5.44493
	3	-26.9804			-2.30931	60.0771	5.43726
	3	-5.98148			-2.3033	59.9851	5.42959
	3	-0.0571429			-2.2973	59.893	5.42194
	3	-12.1579			-2.29129	59.801	5.41429
	3	-16.1111			-2.28529	59.7089	5.40665
	3	-32.2128			-2.27928	59.6169	5.39902
	3	-26.2586			-2.27327	59.5249	5.3914
	3	-6.97619			-2.26727	59.4328	5.3838
	3	-17.8298			-2.26126	59.3408	5.3762
	3	15.129			-2.25526	59.2488	5.3686
	3	0.344262			-2.24925	59.1567	5.36102
	3	-15.1373			-2.24324	59.0647	5.35345
	3	-18.617			-2.23724	58.9726	5.34589
	3	-8.39583			-2.23123	58.8806	5.33834
	3	-18.5806			-2.22523	58.7886	5.3308
	3	-0.84127			-2.21922	58.6965	5.32326
	3	-11.4565			-2.21321	58.6045	5.31574
	3	-56.4			-2.20721	58.5124	5.30823
	3	-21.9818			-2.2012	58.4204	5.30072
	3	-26.5319			-2.1952	58.3284	5.29323
	3	-27.2			-2.18919	58.2363	5.28575
	3	-3.2069			-2.18318	58.1443	5.27827
	3	-6.10606			-2.17718	58.0523	5.27081
	3	-8.30769			-2.17117	57.9602	5.26335
	3	-1.86			-2.16517	57.8682	5.25591
	3	-8.55769			-2.15916	57.7761	5.24848
	3	19.2857			-2.15315	57.6841	5.24105
	3	-19.6441			-2.14715	57.5921	5.23364
	3	1.55556			-2.14114	57.5	5.22623
					-2.13514	57.408	5.21884
					-2.12913	57.316	5.21146
					-2.12312	57.2239	5.20409
					-2.11712	57.1319	5.19673
					-2.11111	57.0398	5.18937
					-2.10511	56.9478	5.18203
					-2.0991	56.8558	5.1747
					-2.09309	56.7637	5.16738
					-2.08709	56.6717	5.16007
					-2.08108	56.5796	5.15278
					-2.07508	56.4876	5.14549
					-2.06907	56.3956	5.13821
					-2.06306	56.3035	5.13094
					-2.05706	56.2115	5.12369
					-2.05105	56.1195	5.11644
					-2.04505	56.0274	5.10921
					-2.03904	55.9354	5.10199
					-2.03303	55.8433	5.09478
					-2.02703	55.7513	5.08758
					-2.02102	55.6593	5.08039
					-2.01502	55.5672	5.07321
					-2.00901	55.4752	5.06604
					-2.003	55.3832	5.05889
					-1.997	55.2911	5.05174
					-1.99099	55.1991	5.04461
					-1.98498	55.107	5.03749
					-1.97898	55.015	5.03038
					-1.97297	54.923	5.02328
					-1.96697	54.8309	5.0162
					-1.96096	54.7389	5.00912
					-1.95495	54.6468	5.00206
					-1.94895	54.5548	4.99501
					-1.94294	54.4628	4.98797
					-1.93694	54.3707	4.98094
					-1.93093	54.2787	4.97392
					-1.92492	54.1867	4.96692
					-1.91892	54.0946	4.95993
					-1.91291	54.0026	4.95294
					-1.90691	53.9105	4.94598
					-1.9009	53.8185	4.93902
					-1.89489	53.7265	4.93208
					-1.88889	53.6344	4.92515
					-1.88288	53.5424	4.91823
					-1.87688	53.4503	4.91132
					-1.87087	53.3583	4.90442
					-1.86486	53.2663	4.89754
					-1.85886	53.1742	4.89067
					-1.85285	53.0822	4.88382
					-1.84685	52.9902	4.87697
					-1.84084	52.8981	4.87014
					-1.83483	52.8061	4.86332
					-1.82883	52.714	4.85651
					-1.82282	52.622	4.84972
					-1.81682	52.53	4.84294
					-1.81081	52.4379	4.83617
					-1.8048	52.3459	4.82942
					-1.7988	52.2538	4.82267
					-1.79279	52.1618	4.81595
					-1.78679	52.0698	4.80923
					-1.78078	51.9777	4.80253
					-1.77477	51.8857	4.79584
					-1.76877	51.7937	4.78916
					-1.76276	51.7016	4.7825
					-1.75676	51.6096	4.77585
					-1.75075	51.5175	4.76921
					-1.74474	51.4255	4.76259
					-1.73874	51.3335	4.75598
					-1.73273	51.2414	4.74939
					-1.72673	51.1494	4.74281
					-1.72072	51.0573	4.73624
					-1.71471	50.9653	4.72969
					-1.70871	50.8733	4.72315
					-1.7027	50.7812	4.71662
					-1.6967	50.6892	4.71011
					-1.69069	50.5972	4.70361
					-1.68468	50.5051	4.69713
					-1.67868	50.4131	4.69066
					-1.67267	50.321	4.6842
					-1.66667	50.229	4.67776
					-1.66066	50.137	4.67134
					-1.65465	50.0449	4.66492
					-1.64865	49.9529	4.65853
					-1.64264	49.8609	4.65214
					-1.63664	49.7688	4.64577
					-1.63063	49.6768	4.63942
					-1.62462	49.5847	4.63308
					-1.61862	49.4927	4.62676
					-1.61261	49.4007	4.62045
					-1.60661	49.3086	4.61415
					-1.6006	49.2166	4.60787
					-1.59459	49.1245	4.60161
					-1.58859	49.0325	4.59535
					-1.58258	48.9405	4.58912
					-1.57658	48.8484	4.5829
					-1.57057	48.7564	4.5767
					-1.56456	48.6644	4.57051
					-1.55856	48.5723	4.56433
					-1.55255	48.4803	4.55817
					-1.54655	48.3882	4.55203
					-1.54054	48.2962	4.5459
					-1.53453	48.2042	4.53979
					-1.52853	48.1121	4.5337
					-1.52252	48.0201	4.52762
					-1.51652	47.928	4.52155
					-1.51051	47.836	4.5155
					-1.5045	47.744	4.50947
					-1.4985	47.6519	4.50345
					-1.49249	47.5599	4.49745
					-1.48649	47.4679	4.49147
					-1.48048	47.3758	4.4855
					-1.47447	47.2838	4.47955
					-1.46847	47.1917	4.47361
					-1.46246	47.0997	4.46769
					-1.45646	47.0077	4.46179
					-1.45045	46.9156	4.45591
					-1.44444	46.8236	4.45004
					-1.43844	46.7316	4.44418
					-1.43243	46.6395	4.43835
					-1.42643	46.5475	4.43253
					-1.42042	46.4554	4.42672
					-1.41441	46.3634	4.42094
					-1.40841	46.2714	4.41517
					-1.4024	46.1793	4.40942
					-1.3964	46.0873	4.40368
					-1.39039	45.9952	4.39797
					-1.38438	45.9032	4.39227
					-1.37838	45.8112	4.38658
					-1.37237	45.7191	4.38092
					-1.36637	45.6271	4.37527
					-1.36036	45.5351	4.36964
					-1.35435	45.443	4.36402
					-1.34835	45.351	4.35843
					-1.34234	45.2589	4.35285
					-1.33634	45.1669	4.34729
					-1.33033	45.0749	4.34175
					-1.32432	44.9828	4.33623
					-1.31832	44.8908	4.33072
					-1.31231	44.7988	4.32523
					-1.30631	44.7067	4.31976
					-1.3003	44.6147	4.31431
					-1.29429	44.5226	4.30888
					-1.28829	44.4306	4.30346
					-1.28228	44.3386	4.29807
					-1.27628	44.2465	4.29269
					-1.27027	44.1545	4.28733
					-1.26426	44.0624	4.28199
					-1.25826	43.9704	4.27667
					-1.25225	43.8784	4.27136
					-1.24625	43.7863	4.26608
					-1.24024	43.6943	4.26081
					-1.23423	43.6023	4.25556
					-1.22823	43.5102	4.25034
					-1.22222	43.4182	4.24513
					-1.21622	43.3261	4.23994
					-1.21021	43.2341	4.23477
					-1.2042	43.1421	4.22962
					-1.1982	43.05	4.22449
					-1.19219	42.958	4.21938
					-1.18619	42.8659	4.21428
					-1.18018	42.7739	4.20921
					-1.17417	42.6819	4.20416
					-1.16817	42.5898	4.19912
					-1.16216	42.4978	4.19411
					-1.15616	42.4058	4.18912
					-1.15015	42.3137	4.18414
					-1.14414	42.2217	4.17919
					-1.13814	42.1296	4.17425
					-1.13213	42.0376	4.16934
					-1.12613	41.9456	4.16445
					-1.12012	41.8535	4.15958
					-1.11411	41.7615	4.15472
					-1.10811	41.6695	4.14989
					-1.1021	41.5774	4.14508
					-1.0961	41.4854	4.14029
					-1.09009	41.3933	4.13552
					-1.08408	41.3013	4.13077
					-1.07808	41.2093	4.12604
					-1.07207	41.1172	4.12133
					-1.06607	41.0252	4.11665
					-1.06006	40.9331	4.11198
					-1.05405	40.8411	4.10733
					-1.04805	40.7491	4.10271
					-1.04204	40.657	4.09811
					-1.03604	40.565	4.09353
					-1.03003	40.473	4.08897
					-1.02402	40.3809	4.08443
					-1.01802	40.2889	4.07991
					-1.01201	40.1968	4.07542
					-1.00601	40.1048	4.07095
					-1	40.0128	4.06649
					-0.993994	39.9207	4.06206
					-0.987988	39.8287	4.05766
					-0.981982	39.7367	4.05327
					-0.975976	39.6446	4.04891
					-0.96997	39.5526	4.04457
					-0.963964	39.4605	4.04025
					-0.957958	39.3685	4.03595
					-0.951952	39.2765	4.03167
					-0.945946	39.1844	4.02742
					-0.93994	39.0924	4.02319
					-0.933934	39.0003	4.01898
					-0.927928	38.9083	4.0148
					-0.921922	38.8163	4.01064
					-0.915916	38.7242	4.0065
					-0.90991	38.6322	4.00238
					-0.903904	38.5402	3.99829
					-0.897898	38.4481	3.99421
					-0.891892	38.3561	3.99017
					-0.885886	38.264	3.98614
					-0.87988	38.172	3.98214
					-0.873874	38.08	3.97816
					-0.867868	37.9879	3.97421
					-0.861862	37.8959	3.97028
					-0.855856	37.8039	3.96637
					-0.84985	37.7118	3.96248
					-0.843844	37.6198	3.95862
					-0.837838	37.5277	3.95478
					-0.831832	37.4357	3.95097
					-0.825826	37.3437	3.94718
					-0.81982	37.2516	3.94341
					-0.813814	37.1596	3.93967
					-0.807808	37.0675	3.93595
					-0.801802	36.9755	3.93226
					-0.795796	36.8835	3.92859
					-0.78979	36.7914	3.92494
					-0.783784	36.6994	3.92132
					-0.777778	36.6074	3.91773
					-0.771772	36.5153	3.91415
					-0.765766	36.4233	3.9106
					-0.75976	36.3312	3.90708
					-0.753754	36.2392	3.90358
					-0.747748	36.1472	3.90011
					-0.741742	36.0551	3.89666
					-0.735736	35.9631	3.89323
					-0.72973	35.871	3.88983
					-0.723724	35.779	3.88646
					-0.717718	35.687	3.88311
					-0.711712	35.5949	3.87978
					-0.705706	35.5029	3.87648
					-0.6997	35.4109	3.87321
					-0.693694	35.3188	3.86996
					-0.687688	35.2268	3.86673
					-0.681682	35.1347	3.86354
					-0.675676	35.0427	3.86036
					-0.66967	34.9507	3.85721
					-0.663664	34.8586	3.85409
					-0.657658	34.7666	3.85099
					-0.651652	34.6746	3.84792
					-0.645646	34.5825	3.84488
					-0.63964	34.4905	3.84186
					-0.633634	34.3984	3.83887
					-0.627628	34.3064	3.8359
					-0.621622	34.2144	3.83296
					-0.615616	34.1223	3.83004
					-0.60961	34.0303	3.82715
					-0.603604	33.9382	3.82429
					-0.597598	33.8462	3.82145
					-0.591592	33.7542	3.81864
					-0.585586	33.6621	3.81586
					-0.57958	33.5701	3.8131
					-0.573574	33.4781	3.81037
					-0.567568	33.386	3.80766
					-0.561562	33.294	3.80498
					-0.555556	33.2019	3.80233
					-0.54955	33.1099	3.79971
					-0.543543	33.0179	3.79711
					-0.537538	32.9258	3.79454
					-0.531532	32.8338	3.79199
					-0.525525	32.7418	3.78947
					-0.51952	32.6497	3.78698
					-0.513513	32.5577	3.78452
					-0.507508	32.4656	3.78208
					-0.501502	32.3736	3.77967
					-0.495495	32.2816	3.77729
					-0.48949	32.1895	3.77494
					-0.483484	32.0975	3.77261
					-0.477477	32.0054	3.77031
					-0.471471	31.9134	3.76803
					-0.465465	31.8214	3.76579
					-0.459459	31.7293	3.76357
					-0.453453	31.6373	3.76138
					-0.447447	31.5453	3.75922
					-0.441441	31.4532	3.75708
					-0.435435	31.3612	3.75497
					-0.429429	31.2691	3.75289
					-0.423423	31.1771	3.75084
					-0.417417	31.0851	3.74882
					-0.411411	30.993	3.74682
					-0.405405	30.901	3.74485
					-0.399399	30.8089	3.74291
					-0.393393	30.7169	3.741
					-0.387387	30.6249	3.73911
					-0.381381	30.5328	3.73726
					-0.375375	30.4408	3.73543
					-0.369369	30.3488	3.73363
					-0.363363	30.2567	3.73185
					-0.357357	30.1647	3.73011
					-0.351351	30.0726	3.72839
					-0.345345	29.9806	3.72671
					-0.339339	29.8886	3.72505
					-0.333333	29.7965	3.72342
					-0.327327	29.7045	3.72181
					-0.321321	29.6125	3.72024
					-0.315315	29.5204	3.71869
					-0.309309	29.4284	3.71718
					-0.303303	29.3363	3.71569
					-0.297297	29.2443	3.71423
					-0.291291	29.1523	3.7128
					-0.285285	29.0602	3.7114
					-0.279279	28.9682	3.71002
					-0.273273	28.8761	3.70868
					-0.267267	28.7841	3.70736
					-0.261261	28.6921	3.70607
					-0.255255	28.6	3.70482
					-0.249249	28.508	3.70359
					-0.243243	28.416	3.70238
					-0.237237	28.3239	3.70121
					-0.231231	28.2319	3.70007
					-0.225225	28.1398	3.69896
					-0.219219	28.0478	3.69787
					-0.213213	27.9558	3.69681
					-0.207207	27.8637	3.69579
					-0.201201	27.7717	3.69479
					-0.195195	27.6796	3.69382
					-0.189189	27.5876	3.69288
					-0.183183	27.4956	3.69197
					-0.177177	27.4035	3.69109
					-0.171171	27.3115	3.69024
					-0.165165	27.2195	3.68941
					-0.159159	27.1274	3.68862
					-0.153153	27.0354	3.68786
					-0.147147	26.9433	3.68712
					-0.141141	26.8513	3.68641
					-0.135135	26.7593	3.68574
					-0.129129	26.6672	3.68509
					-0.123123	26.5752	3.68447
					-0.117117	26.4832	3.68388
					-0.111111	26.3911	3.68332
					-0.105105	26.2991	3.68279
					-0.0990991	26.207	3.68229
					-0.0930931	26.115	3.68182
					-0.0870871	26.023	3.68138
					-0.0810811	25.9309	3.68097
					-0.0750751	25.8389	3.68059
					-0.0690691	25.7468	3.68023
					-0.0630631	25.6548	3.67991
					-0.0570571	25.5628	3.67961
					-0.0510511	25.4707	3.67935
					-0.045045	25.3787	3.67911
					-0.039039	25.2867	3.6789
					-0.033033	25.1946	3.67873
					-0.027027	25.1026	3.67858
					-0.021021	25.0105	3.67846
					-0.015015	24.9185	3.67837
					-0.00900901	24.8265	3.67832
					-0.003003	24.7344	3.67829
					0.003003	24.6424	3.67829
					0.00900901	24.5504	3.67832
					0.015015	24.4583	3.67837
					0.021021	24.3663	3.67846
					0.027027	24.2742	3.67858
					0.033033	24.1822	3.67873
					0.039039	24.0902	3.6789
					0.045045	23.9981	3.67911
					0.0510511	23.9061	3.67935
					0.0570571	23.814	3.67961
					0.0630631	23.722	3.67991
					0.0690691	23.63	3.68023
					0.0750751	23.5379	3.68059
					0.0810811	23.4459	3.68097
					0.0870871	23.3539	3.68138
					0.0930931	23.2618	3.68182
					0.0990991	23.1698	3.68229
					0.105105	23.0777	3.68279
					0.111111	22.9857	3.68332
					0.117117	22.8937	3.68388
					0.123123	22.8016	3.68447
					0.129129	22.7096	3.68509
					0.135135	22.6175	3.68574
					0.141141	22.5255	3.68641
					0.147147	22.4335	3.68712
					0.153153	22.3414	3.68786
					0.159159	22.2494	3.68862
					0.165165	22.1574	3.68941
					0.171171	22.0653	3.69024
					0.177177	21.9733	3.69109
					0.183183	21.8812	3.69197
					0.189189	21.7892	3.69288
					0.195195	21.6972	3.69382
					0.201201	21.6051	3.69479
					0.207207	21.5131	3.69579
					0.213213	21.4211	3.69681
					0.219219	21.329	3.69787
					0.225225	21.237	3.69896
					0.231231	21.1449	3.70007
					0.237237	21.0529	3.70121
					0.243243	20.9609	3.70238
					0.249249	20.8688	3.70359
					0.255255	20.7768	3.70482
					0.261261	20.6847	3.70607
					0.267267	20.5927	3.70736
					0.273273	20.5007	3.70868
					0.279279	20.4086	3.71002
					0.285285	20.3166	3.7114
					0.291291	20.2246	3.7128
					0.297297	20.1325	3.71423
					0.303303	20.0405	3.71569
					0.309309	19.9484	3.71718
					0.315315	19.8564	3.71869
					0.321321	19.7644	3.72024
					0.327327	19.6723	3.72181
					0.333333	19.5803	3.72342
					0.339339	19.4882	3.72505
					0.345345	19.3962	3.72671
					0.351351	19.3042	3.72839
					0.357357	19.2121	3.73011
					0.363363	19.1201	3.73185
					0.369369	19.0281	3.73363
					0.375375	18.936	3.73543
					0.381381	18.844	3.73726
					0.387387	18.7519	3.73911
					0.393393	18.6599	3.741
					0.399399	18.5679	3.74291
					0.405405	18.4758	3.74485
					0.411411	18.3838	3.74682
					0.417417	18.2918	3.74882
					0.423423	18.1997	3.75084
					0.429429	18.1077	3.75289
					0.435435	18.0156	3.75497
					0.441441	17.9236	3.75708
					0.447447	17.8316	3.75922
					0.453453	17.7395	3.76138
					0.459459	17.6475	3.76357
					0.465465	17.5554	3.76579
					0.471471	17.4634	3.76803
					0.477477	17.3714	3.77031
					0.483484	17.2793	3.77261
					0.48949	17.1873	3.77494
					0.495495	17.0953	3.77729
					0.501502	17.0032	3.77967
					0.507508	16.9112	3.78208
					0.513513	16.8191	3.78452
					0.51952	16.7271	3.78698
					0.525525	16.6351	3.78947
					0.531532	16.543	3.79199
					0.537538	16.451	3.79454
					0.543543	16.359	3.79711
					0.54955	16.2669	3.79971
					0.555556	16.1749	3.80233
					0.561562	16.0828	3.80498
					0.567568	15.9908	3.80766
					0.573574	15.8988	3.81037
					0.57958	15.8067	3.8131
					0.585586	15.7147	3.81586
					0.591592	15.6226	3.81864
					0.597598	15.5306	3.82145
					0.603604	15.4386	3.82429
					0.60961	15.3465	3.82715
					0.615616	15.2545	3.83004
					0.621622	15.1625	3.83296
					0.627628	15.0704	3.8359
					0.633634	14.9784	3.83887
					0.63964	14.8863	3.84186
					0.645646	14.7943	3.84488
					0.651652	14.7023	3.84792
					0.657658	14.6102	3.85099
					0.663664	14.5182	3.85409
					0.66967	14.4261	3.85721
					0.675676	14.3341	3.86036
					0.681682	14.2421	3.86354
					0.687688	14.15	3.86673
					0.693694	14.058	3.86996
					0.6997	13.966	3.87321
					0.705706	13.8739	3.87648
					0.711712	13.7819	3.87978
					0.717718	13.6898	3.88311
					0.723724	13.5978	3.88646
					0.72973	13.5058	3.88983
					0.735736	13.4137	3.89323
					0.741742	13.3217	3.89666
					0.747748	13.2297	3.90011
					0.753754	13.1376	3.90358
					0.75976	13.0456	3.90708
					0.765766	12.9535	3.9106
					0.771772	12.8615	3.91415
					0.777778	12.7695	3.91773
					0.783784	12.6774	3.92132
					0.78979	12.5854	3.92494
					0.795796	12.4933	3.92859
					0.801802	12.4013	3.93226
					0.807808	12.3093	3.93595
					0.813814	12.2172	3.93967
					0.81982	12.1252	3.94341
					0.825826	12.0332	3.94718
					0.831832	11.9411	3.95097
					0.837838	11.8491	3.95478
					0.843844	11.757	3.95862
					0.84985	11.665	3.96248
					0.855856	11.573	3.96637
					0.861862	11.4809	3.97028
					0.867868	11.3889	3.97421
					0.873874	11.2968	3.97816
					0.87988	11.2048	3.98214
					0.885886	11.1128	3.98614
					0.891892	11.0207	3.99017
					0.897898	10.9287	3.99421
					0.903904	10.8367	3.99829
					0.90991	10.7446	4.00238
					0.915916	10.6526	4.0065
					0.921922	10.5605	4.01064
					0.927928	10.4685	4.0148
					0.933934	10.3765	4.01898
					0.93994	10.2844	4.02319
					0.945946	10.1924	4.02742
					0.951952	10.1004	4.03167
					0.957958	10.0083	4.03595
					0.963964	9.91628	4.04025
					0.96997	9.82424	4.04457
					0.975976	9.7322	4.04891
					0.981982	9.64016	4.05327
					0.987988	9.54812	4.05766
					0.993994	9.45608	4.06206
					1	9.36405	4.06649
					1.00601	9.27201	4.07095
					1.01201	9.17997	4.07542
					1.01802	9.08793	4.07991
					1.02402	8.99589	4.08443
					1.03003	8.90386	4.08897
					1.03604	8.81182	4.09353
					1.04204	8.71978	4.09811
					1.04805	8.62774	4.10271
					1.05405	8.5357	4.10733
					1.06006	8.44367	4.11198
					1.06607	8.35163	4.11665
					1.07207	8.25959	4.12133
					1.07808	8.16755	4.12604
					1.08408	8.07551	4.13077
					1.09009	7.98347	4.13552
					1.0961	7.89144	4.14029
					1.1021	7.7994	4.14508
					1.10811	7.70736	4.14989
					1.11411	7.61532	4.15472
					1.12012	7.52328	4.15958
					1.12613	7.43125	4.16445
					1.13213	7.33921	4.16934
					1.13814	7.24717	4.17425
					1.14414	7.15513	4.17919
					1.15015	7.06309	4.18414
					1.15616	6.97105	4.18912
					1.16216	6.87902	4.19411
					1.16817	6.78698	4.19912
					1.17417	6.69494	4.20416
					1.18018	6.6029	4.20921
					1.18619	6.51086	4.21428
					1.19219	6.41883	4.21938
					1.1982	6.32679	4.22449
					1.2042	6.23475	4.22962
					1.21021	6.14271	4.23477
					1.21622	6.05067	4.23994
					1.22222	5.95863	4.24513
					1.22823	5.8666	4.25034
					1.23423	5.77456	4.25556
					1.24024	5.68252	4.26081
					1.24625	5.59048	4.26608
					1.25225	5.49844	4.27136
					1.25826	5.40641	4.27667
					1.26426	5.31437	4.28199
					1.27027	5.22233	4.28733
					1.27628	5.13029	4.29269
					1.28228	5.03825	4.29807
					1.28829	4.94621	4.30346
					1.29429	4.85418	4.30888
					1.3003	4.76214	4.31431
					1.30631	4.6701	4.31976
					1.31231	4.57806	4.32523
					1.31832	4.48602	4.33072
					1.32432	4.39398	4.33623
					1.33033	4.30195	4.34175
					1.33634	4.20991	4.34729
					1.34234	4.11787	4.35285
					1.34835	4.02583	4.35843
					1.35435	3.93379	4.36402
					1.36036	3.84176	4.36964
					1.36637	3.74972	4.37527
					1.37237	3.65768	4.38092
					1.37838	3.56564	4.38658
					1.38438	3.4736	4.39227
					1.39039	3.38156	4.39797
					1.3964	3.28953	4.40368
					1.4024	3.19749	4.40942
					1.40841	3.10545	4.41517
					1.41441	3.01341	4.42094
					1.42042	2.92137	4.42672
					1.42643	2.82934	4.43253
					1.43243	2.7373	4.43835
					1.43844	2.64526	4.44418
					1.44444	2.55322	4.45004
					1.45045	2.46118	4.45591
					1.45646	2.36914	4.46179
					1.46246	2.27711	4.46769
					1.46847	2.18507	4.47361
					1.47447	2.09303	4.47955
					1.48048	2.00099	4.4855
					1.48649	1.90895	4.49147
					1.49249	1.81692	4.49745
					1.4985	1.72488	4.50345
					1.5045	1.63284	4.50947
					1.51051	1.5408	4.5155
					1.51652	1.44876	4.52155
					1.52252	1.35672	4.52762
					1.52853	1.26469	4.5337
					1.53453	1.17265	4.53979
					1.54054	1.08061	4.5459
					1.54655	0.988571	4.55203
					1.55255	0.896533	4.55817
					1.55856	0.804495	4.56433
					1.56456	0.712457	4.57051
					1.57057	0.620418	4.5767
					1.57658	0.52838	4.5829
					1.58258	0.436342	4.58912
					1.58859	0.344304	4.59535
					1.59459	0.252266	4.60161
					1.6006	0.160227	4.60787
					1.60661	0.0681892	4.61415
					1.61261	-0.023849	4.62045
					1.61862	-0.115887	4.62676
					1.62462	-0.207925	4.63308
					1.63063	-0.299964	4.63942
					1.63664	-0.392002	4.64577
					1.64264	-0.48404	4.65214
					1.64865	-0.576078	4.65853
					1.65465	-0.668116	4.66492
					1.66066	-0.760155	4.67134
					1.66667	-0.852193	4.67776
					1.67267	-0.944231	4.6842
					1.67868	-1.03627	4.69066
					1.68468	-1.12831	4.69713
					1.69069	-1.22035	4.70361
					1.6967	-1.31238	4.71011
					1.7027	-1.40442	4.71662
					1.70871	-1.49646	4.72315
					1.71471	-1.5885	4.72969
					1.72072	-1.68054	4.73624
					1.72673	-1.77257	4.74281
					1.73273	-1.86461	4.74939
					1.73874	-1.95665	4.75598
					1.74474	-2.04869	4.76259
					1.75075	-2.14073	4.76921
					1.75676	-2.23277	4.77585
					1.76276	-2.3248	4.7825
					1.76877	-2.41684	4.78916
					1.77477	-2.50888	4.79584
					1.78078	-2.60092	4.80253
					1.78679	-2.69296	4.80923
					1.79279	-2.78499	4.81595
					1.7988	-2.87703	4.82267
					1.8048	-2.96907	4.82942
					1.81081	-3.06111	4.83617
					1.81682	-3.15315	4.84294
					1.82282	-3.24519	4.84972
					1.82883	-3.33722	4.85651
					1.83483	-3.42926	4.86332
					1.84084	-3.5213	4.87014
					1.84685	-3.61334	4.87697
					1.85285	-3.70538	4.88382
					1.85886	-3.79742	4.89067
					1.86486	-3.88945	4.89754
					1.87087	-3.98149	4.90442
					1.87688	-4.07353	4.91132
					1.88288	-4.16557	4.91823
					1.88889	-4.25761	4.92515
					1.89489	-4.34964	4.93208
					1.9009	-4.44168	4.93902
					1.90691	-4.53372	4.94598
					1.91291	-4.62576	4.95294
					1.91892	-4.7178	4.95993
					1.92492	-4.80984	4.96692
					1.93093	-4.90187	4.97392
					1.93694	-4.99391	4.98094
					1.94294	-5.08595	4.98797
					1.94895	-5.17799	4.99501
					1.95495	-5.27003	5.00206
					1.96096	-5.36206	5.00912
					1.96697	-5.4541	5.0162
					1.97297	-5.54614	5.02328
					1.97898	-5.63818	5.03038
					1.98498	-5.73022	5.03749
					1.99099	-5.82226	5.04461
					1.997	-5.91429	5.05174
					2.003	-6.00633	5.05889
					2.00901	-6.09837	5.06604
					2.01502	-6.19041	5.07321
					2.02102	-6.28245	5.08039
					2.02703	-6.37448	5.08758
					2.03303	-6.46652	5.09478
					2.03904	-6.55856	5.10199
					2.04505	-6.6506	5.10921
					2.05105	-6.74264	5.11644
					2.05706	-6.83468	5.12369
					2.06306	-6.92671	5.13094
					2.06907	-7.01875	5.13821
					2.07508	-7.11079	5.14549
					2.08108	-7.20283	5.15278
					2.08709	-7.29487	5.16007
					2.09309	-7.3869	5.16738
					2.0991	-7.47894	5.1747
					2.10511	-7.57098	5.18203
					2.11111	-7.66302	5.18937
					2.11712	-7.75506	5.19673
					2.12312	-7.8471	5.20409
					2.12913	-7.93913	5.21146
					2.13514	-8.03117	5.21884
					2.14114	-8.12321	5.22623
					2.14715	-8.21525	5.23364
					2.15315	-8.30729	5.24105
					2.15916	-8.39932	5.24848
					2.16517	-8.49136	5.25591
					2.17117	-8.5834	5.26335
					2.17718	-8.67544	5.27081
					2.18318	-8.76748	5.27827
					2.18919	-8.85952	5.28575
					2.1952	-8.95155	5.29323
					2.2012	-9.04359	5.30072
					2.20721	-9.13563	5.30823
					2.21321	-9.22767	5.31574
					2.21922	-9.31971	5.32326
					2.22523	-9.41174	5.3308
					2.23123	-9.50378	5.33834
					2.23724	-9.59582	5.34589
					2.24324	-9.68786	5.35345
					2.24925	-9.7799	5.36102
					2.25526	-9.87194	5.3686
					2.26126	-9.96397	5.3762
					2.26727	-10.056	5.3838
					2.27327	-10.1481	5.3914
					2.27928	-10.2401	5.39902
					2.28529	-10.3321	5.40665
					2.29129	-10.4242	5.41429
					2.2973	-10.5162	5.42194
					2.3033	-10.6082	5.42959
					2.30931	-10.7003	5.43726
					2.31532	-10.7923	5.44493
					2.32132	-10.8844	5.45261
					2.32733	-10.9764	5.46031
					2.33333	-11.0684	5.46801
					2.33934	-11.1605	5.47572
					2.34535	-11.2525	5.48344
					2.35135	-11.3445	5.49116
					2.35736	-11.4366	5.4989
					2.36336	-11.5286	5.50665
					2.36937	-11.6207	5.5144
					2.37538	-11.7127	5.52216
					2.38138	-11.8047	5.52994
					2.38739	-11.8968	5.53772
					2.39339	-11.9888	5.54551
					2.3994	-12.0809	5.5533
					2.40541	-12.1729	5.56111
					2.41141	-12.2649	5.56893
					2.41742	-12.357	5.57675
					2.42342	-12.449	5.58458
					2.42943	-12.541	5.59242
					2.43544	-12.6331	5.60027
					2.44144	-12.7251	5.60813
					2.44745	-12.8172	5.61599
					2.45345	-12.9092	5.62387
					2.45946	-13.0012	5.63175
					2.46547	-13.0933	5.63964
					2.47147	-13.1853	5.64754
					2.47748	-13.2773	5.65544
					2.48348	-13.3694	5.66336
					2.48949	-13.4614	5.67128
					2.4955	-13.5535	5.67921
					2.5015	-13.6455	5.68715
					2.50751	-13.7375	5.6951
					2.51351	-13.8296	5.70305
					2.51952	-13.9216	5.71101
					2.52553	-14.0137	5.71898
					2.53153	-14.1057	5.72696
					2.53754	-14.1977	5.73495
					2.54354	-14.2898	5.74294
					2.54955	-14.3818	5.75094
					2.55556	-14.4738	5.75895
					2.56156	-14.5659	5.76697
					2.56757	-14.6579	5.77499
					2.57357	-14.75	5.78303
					2.57958	-14.842	5.79107
					2.58559	-14.934	5.79911
					2.59159	-15.0261	5.80717
					2.5976	-15.1181	5.81523
					2.6036	-15.2102	5.8233
					2.60961	-15.3022	5.83138
					2.61562	-15.3942	5.83946
					2.62162	-15.4863	5.84756
					2.62763	-15.5783	5.85565
					2.63363	-15.6703	5.86376
					2.63964	-15.7624	5.87188
					2.64565	-15.8544	5.88
					2.65165	-15.9465	5.88813
					2.65766	-16.0385	5.89626
					2.66366	-16.1305	5.9044
					2.66967	-16.2226	5.91255
					2.67568	-16.3146	5.92071
					2.68168	-16.4066	5.92888
					2.68769	-16.4987	5.93705
					2.69369	-16.5907	5.94523
					2.6997	-16.6828	5.95341
					2.70571	-16.7748	5.9616
					2.71171	-16.8668	5.9698
					2.71772	-16.9589	5.97801
					2.72372	-17.0509	5.98622
					2.72973	-17.143	5.99444
					2.73574	-17.235	6.00267
					2.74174	-17.327	6.0109
					2.74775	-17.4191	6.01914
					2.75375	-17.5111	6.02739
					2.75976	-17.6031	6.03564
					2.76577	-17.6952	6.0439
					2.77177	-17.7872	6.05217
					2.77778	-17.8793	6.06044
					2.78378	-17.9713	6.06872
					2.78979	-18.0633	6.07701
					2.7958	-18.1554	6.0853
					2.8018	-18.2474	6.0936
					2.80781	-18.3394	6.10191
					2.81381	-18.4315	6.11022
					2.81982	-18.5235	6.11854
					2.82583	-18.6156	6.12686
					2.83183	-18.7076	6.13519
					2.83784	-18.7996	6.14353
					2.84384	-18.8917	6.15188
					2.84985	-18.9837	6.16023
					2.85586	-19.0758	6.16858
					2.86186	-19.1678	6.17695
					2.86787	-19.2598	6.18532
					2.87387	-19.3519	6.19369
					2.87988	-19.4439	6.20207
					2.88589	-19.5359	6.21046
					2.89189	-19.628	6.21886
					2.8979	-19.72	6.22726
					2.9039	-19.8121	6.23566
					2.90991	-19.9041	6.24408
					2.91592	-19.9961	6.25249
					2.92192	-20.0882	6.26092
					2.92793	-20.1802	6.26935
					2.93393	-20.2723	6.27779
					2.93994	-20.3643	6.28623
					2.94595	-20.4563	6.29468
					2.95195	-20.5484	6.30313
					2.95796	-20.6404	6.31159
					2.96396	-20.7324	6.32006
					2.96997	-20.8245	6.32853
					2.97598	-20.9165	6.337
					2.98198	-21.0086	6.34549
					2.98799	-21.1006	6.35398
					2.99399	-21.1926	6.36247
					3	-21.2847	6.37097

## Sheet: Fig.S4b
scatter point	social engagement score	distractor bias (ms)		fitted curve	social engagement score	distractor bias (ms)	errorbar
	-1	33.6429			-3	78.7253	14.3014
	-1	11.95			-2.99399	78.6171	14.2769
	-1	49.6591			-2.98799	78.5089	14.2523
	-1	38.2619			-2.98198	78.4008	14.2278
	-1	69.1346			-2.97598	78.2926	14.2033
	-1	79.4444			-2.96997	78.1844	14.1788
	-1	86.8333			-2.96396	78.0762	14.1543
	-1	86.6889			-2.95796	77.968	14.1298
	-1	85.9565			-2.95195	77.8598	14.1053
	-1	79.7241			-2.94595	77.7517	14.0808
	-1	81.1739			-2.93994	77.6435	14.0564
	-1	78.9688			-2.93393	77.5353	14.0319
	-1	64.7143			-2.92793	77.4271	14.0074
	-1	45.5714			-2.92192	77.3189	13.983
	-1	57.1316			-2.91592	77.2108	13.9585
	-1	64.4571			-2.90991	77.1026	13.9341
	-1	70.5			-2.9039	76.9944	13.9097
	-1	97.5532			-2.8979	76.8862	13.8853
	-1	77.0286			-2.89189	76.778	13.8608
	-1	94.5641			-2.88589	76.6698	13.8364
	-1	85.0816			-2.87988	76.5617	13.812
	-1	86.5333			-2.87387	76.4535	13.7876
	-1	109.727			-2.86787	76.3453	13.7633
	-1	76.375			-2.86186	76.2371	13.7389
	-1	40.4103			-2.85586	76.1289	13.7145
	-1	26.2453			-2.84985	76.0207	13.6902
	-1	62.8235			-2.84384	75.9126	13.6658
	-1	71.4865			-2.83784	75.8044	13.6415
	-1	64.4364			-2.83183	75.6962	13.6171
	-1	85.5833			-2.82583	75.588	13.5928
	-1	62.3421			-2.81982	75.4798	13.5685
	-1	89			-2.81381	75.3717	13.5442
	-1	107.143			-2.80781	75.2635	13.5199
	-1	119.458			-2.8018	75.1553	13.4956
	-1	45.7692			-2.7958	75.0471	13.4713
	-1	102.5			-2.78979	74.9389	13.447
	-1	35.8036			-2.78378	74.8307	13.4228
	-1	64.2321			-2.77778	74.7226	13.3985
	-1	59.3509			-2.77177	74.6144	13.3743
	-1	58.8286			-2.76577	74.5062	13.35
	-1	22.3284			-2.75976	74.398	13.3258
	-1	42.5972			-2.75375	74.2898	13.3016
	-1	50.1364			-2.74775	74.1817	13.2773
	-1	63.4792			-2.74174	74.0735	13.2531
	-1	47.1045			-2.73574	73.9653	13.2289
	-1	24.3571			-2.72973	73.8571	13.2048
	-1	33.16			-2.72372	73.7489	13.1806
	-1	40.6889			-2.71772	73.6407	13.1564
	-1	19.6182			-2.71171	73.5326	13.1322
	-1	31.2456			-2.70571	73.4244	13.1081
	-1	31.6721			-2.6997	73.3162	13.0839
	-1	54.75			-2.69369	73.208	13.0598
	-1	12.1452			-2.68769	73.0998	13.0357
	-1	-2.15789			-2.68168	72.9917	13.0116
	-1	19.037			-2.67568	72.8835	12.9875
	-1	9.97872			-2.66967	72.7753	12.9634
	-1	38.6522			-2.66366	72.6671	12.9393
	-1	23.6765			-2.65766	72.5589	12.9152
	-1	6.42857			-2.65165	72.4507	12.8911
	-1	31.6042			-2.64565	72.3426	12.8671
	-1	63.5345			-2.63964	72.2344	12.843
	-1	64.1148			-2.63363	72.1262	12.819
	-1	55.9828			-2.62763	72.018	12.7949
	-1	54.0667			-2.62162	71.9098	12.7709
	-1	65.3824			-2.61562	71.8016	12.7469
	-1	64.44			-2.60961	71.6935	12.7229
	-1	71.4615			-2.6036	71.5853	12.6989
	-1	39.7551			-2.5976	71.4771	12.6749
	-1	48.3651			-2.59159	71.3689	12.651
	-1	54.9394			-2.58559	71.2607	12.627
	-1	36.4286			-2.57958	71.1526	12.6031
	-1	55.9773			-2.57357	71.0444	12.5791
	2	5.46667			-2.56757	70.9362	12.5552
	2	-27.1667			-2.56156	70.828	12.5313
	2	-7.33929			-2.55556	70.7198	12.5074
	2	-8.18605			-2.54955	70.6116	12.4835
	2	-4.57627			-2.54354	70.5035	12.4596
	2	5.65			-2.53754	70.3953	12.4357
	2	3.40625			-2.53153	70.2871	12.4118
	2	-2.58974			-2.52553	70.1789	12.388
	2	37.25			-2.51952	70.0707	12.3641
	2	1.84211			-2.51351	69.9626	12.3403
	2	4.39535			-2.50751	69.8544	12.3165
	2	13.5484			-2.5015	69.7462	12.2926
	2	10.8605			-2.4955	69.638	12.2688
	2	-17.7679			-2.48949	69.5298	12.2451
	2	-7.38182			-2.48348	69.4216	12.2213
	2	-1.25			-2.47748	69.3135	12.1975
	2	2.85965			-2.47147	69.2053	12.1737
	2	-3.27273			-2.46547	69.0971	12.15
	2	-4.32258			-2.45946	68.9889	12.1263
	2	-16.225			-2.45345	68.8807	12.1025
	2	5.46154			-2.44745	68.7725	12.0788
	2	-12.3125			-2.44144	68.6644	12.0551
	2	9.65306			-2.43544	68.5562	12.0314
	2	-18.5556			-2.42943	68.448	12.0078
	2	19.6905			-2.42342	68.3398	11.9841
	2	0.188679			-2.41742	68.2316	11.9605
	2	2.92727			-2.41141	68.1235	11.9368
	2	16.8372			-2.40541	68.0153	11.9132
	2	8.40323			-2.3994	67.9071	11.8896
	2	22.5862			-2.39339	67.7989	11.866
	2	10.3438			-2.38739	67.6907	11.8424
	2	15.7179			-2.38138	67.5825	11.8188
	2	9.16667			-2.37538	67.4744	11.7952
	2	-14.825			-2.36937	67.3662	11.7717
	2	8.4			-2.36336	67.258	11.7481
	2	26.3077			-2.35736	67.1498	11.7246
	0	-61.5			-2.35135	67.0416	11.7011
	0	-64.4062			-2.34535	66.9335	11.6776
	0	-41.3778			-2.33934	66.8253	11.6541
	0	-20.1633			-2.33333	66.7171	11.6306
	0	-22.2698			-2.32733	66.6089	11.6072
	0	-23.7385			-2.32132	66.5007	11.5837
	0	-26.5686			-2.31532	66.3925	11.5603
	0	-26.9804			-2.30931	66.2844	11.5368
	0	-5.98148			-2.3033	66.1762	11.5134
	0	-0.0571429			-2.2973	66.068	11.49
	0	-12.1579			-2.29129	65.9598	11.4667
	0	-16.1111			-2.28529	65.8516	11.4433
	0	-32.2128			-2.27928	65.7435	11.4199
	0	-26.2586			-2.27327	65.6353	11.3966
	0	-6.97619			-2.26727	65.5271	11.3733
	0	-17.8298			-2.26126	65.4189	11.3499
	0	15.129			-2.25526	65.3107	11.3266
	0	0.344262			-2.24925	65.2026	11.3033
	0	-15.1373			-2.24324	65.0944	11.2801
	0	-18.617			-2.23724	64.9862	11.2568
	0	-8.39583			-2.23123	64.878	11.2336
	0	-18.5806			-2.22523	64.7698	11.2103
	0	-0.84127			-2.21922	64.6616	11.1871
	0	-11.4565			-2.21321	64.5535	11.1639
	0	-56.4			-2.20721	64.4453	11.1407
	0	-21.9818			-2.2012	64.3371	11.1176
	0	-26.5319			-2.1952	64.2289	11.0944
	0	-27.2			-2.18919	64.1207	11.0713
	0	-3.2069			-2.18318	64.0126	11.0481
	0	-6.10606			-2.17718	63.9044	11.025
	0	-8.30769			-2.17117	63.7962	11.0019
	0	-1.86			-2.16517	63.688	10.9789
	0	-8.55769			-2.15916	63.5798	10.9558
	0	19.2857			-2.15315	63.4716	10.9327
	0	-19.6441			-2.14715	63.3635	10.9097
	0	1.55556			-2.14114	63.2553	10.8867
					-2.13514	63.1471	10.8637
					-2.12913	63.0389	10.8407
					-2.12312	62.9307	10.8177
					-2.11712	62.8225	10.7948
					-2.11111	62.7144	10.7719
					-2.10511	62.6062	10.7489
					-2.0991	62.498	10.726
					-2.09309	62.3898	10.7031
					-2.08709	62.2816	10.6803
					-2.08108	62.1735	10.6574
					-2.07508	62.0653	10.6346
					-2.06907	61.9571	10.6118
					-2.06306	61.8489	10.589
					-2.05706	61.7407	10.5662
					-2.05105	61.6325	10.5434
					-2.04505	61.5244	10.5207
					-2.03904	61.4162	10.4979
					-2.03303	61.308	10.4752
					-2.02703	61.1998	10.4525
					-2.02102	61.0916	10.4298
					-2.01502	60.9834	10.4072
					-2.00901	60.8753	10.3845
					-2.003	60.7671	10.3619
					-1.997	60.6589	10.3393
					-1.99099	60.5507	10.3167
					-1.98498	60.4425	10.2941
					-1.97898	60.3344	10.2716
					-1.97297	60.2262	10.2491
					-1.96697	60.118	10.2266
					-1.96096	60.0098	10.2041
					-1.95495	59.9016	10.1816
					-1.94895	59.7935	10.1591
					-1.94294	59.6853	10.1367
					-1.93694	59.5771	10.1143
					-1.93093	59.4689	10.0919
					-1.92492	59.3607	10.0695
					-1.91892	59.2525	10.0472
					-1.91291	59.1444	10.0248
					-1.90691	59.0362	10.0025
					-1.9009	58.928	9.98022
					-1.89489	58.8198	9.95795
					-1.88889	58.7116	9.9357
					-1.88288	58.6035	9.91347
					-1.87688	58.4953	9.89125
					-1.87087	58.3871	9.86907
					-1.86486	58.2789	9.8469
					-1.85886	58.1707	9.82475
					-1.85285	58.0625	9.80263
					-1.84685	57.9544	9.78053
					-1.84084	57.8462	9.75845
					-1.83483	57.738	9.73639
					-1.82883	57.6298	9.71435
					-1.82282	57.5216	9.69234
					-1.81682	57.4134	9.67035
					-1.81081	57.3053	9.64838
					-1.8048	57.1971	9.62643
					-1.7988	57.0889	9.60451
					-1.79279	56.9807	9.58261
					-1.78679	56.8725	9.56074
					-1.78078	56.7644	9.53888
					-1.77477	56.6562	9.51705
					-1.76877	56.548	9.49525
					-1.76276	56.4398	9.47347
					-1.75676	56.3316	9.45171
					-1.75075	56.2234	9.42998
					-1.74474	56.1153	9.40827
					-1.73874	56.0071	9.38659
					-1.73273	55.8989	9.36493
					-1.72673	55.7907	9.34329
					-1.72072	55.6825	9.32169
					-1.71471	55.5744	9.3001
					-1.70871	55.4662	9.27854
					-1.7027	55.358	9.25701
					-1.6967	55.2498	9.23551
					-1.69069	55.1416	9.21403
					-1.68468	55.0334	9.19257
					-1.67868	54.9253	9.17115
					-1.67267	54.8171	9.14975
					-1.66667	54.7089	9.12837
					-1.66066	54.6007	9.10703
					-1.65465	54.4925	9.08571
					-1.64865	54.3844	9.06441
					-1.64264	54.2762	9.04315
					-1.63664	54.168	9.02191
					-1.63063	54.0598	9.0007
					-1.62462	53.9516	8.97952
					-1.61862	53.8434	8.95837
					-1.61261	53.7353	8.93724
					-1.60661	53.6271	8.91615
					-1.6006	53.5189	8.89508
					-1.59459	53.4107	8.87405
					-1.58859	53.3025	8.85304
					-1.58258	53.1944	8.83206
					-1.57658	53.0862	8.81111
					-1.57057	52.978	8.79019
					-1.56456	52.8698	8.7693
					-1.55856	52.7616	8.74845
					-1.55255	52.6534	8.72762
					-1.54655	52.5453	8.70683
					-1.54054	52.4371	8.68606
					-1.53453	52.3289	8.66533
					-1.52853	52.2207	8.64462
					-1.52252	52.1125	8.62395
					-1.51652	52.0044	8.60332
					-1.51051	51.8962	8.58271
					-1.5045	51.788	8.56214
					-1.4985	51.6798	8.54159
					-1.49249	51.5716	8.52109
					-1.48649	51.4634	8.50061
					-1.48048	51.3553	8.48017
					-1.47447	51.2471	8.45976
					-1.46847	51.1389	8.43939
					-1.46246	51.0307	8.41905
					-1.45646	50.9225	8.39874
					-1.45045	50.8143	8.37847
					-1.44444	50.7062	8.35824
					-1.43844	50.598	8.33804
					-1.43243	50.4898	8.31787
					-1.42643	50.3816	8.29774
					-1.42042	50.2734	8.27765
					-1.41441	50.1653	8.25759
					-1.40841	50.0571	8.23757
					-1.4024	49.9489	8.21759
					-1.3964	49.8407	8.19764
					-1.39039	49.7325	8.17773
					-1.38438	49.6243	8.15786
					-1.37838	49.5162	8.13802
					-1.37237	49.408	8.11823
					-1.36637	49.2998	8.09847
					-1.36036	49.1916	8.07875
					-1.35435	49.0834	8.05907
					-1.34835	48.9753	8.03943
					-1.34234	48.8671	8.01983
					-1.33634	48.7589	8.00027
					-1.33033	48.6507	7.98074
					-1.32432	48.5425	7.96126
					-1.31832	48.4343	7.94182
					-1.31231	48.3262	7.92242
					-1.30631	48.218	7.90306
					-1.3003	48.1098	7.88375
					-1.29429	48.0016	7.86447
					-1.28829	47.8934	7.84524
					-1.28228	47.7853	7.82605
					-1.27628	47.6771	7.8069
					-1.27027	47.5689	7.7878
					-1.26426	47.4607	7.76874
					-1.25826	47.3525	7.74972
					-1.25225	47.2443	7.73075
					-1.24625	47.1362	7.71182
					-1.24024	47.028	7.69294
					-1.23423	46.9198	7.6741
					-1.22823	46.8116	7.6553
					-1.22222	46.7034	7.63656
					-1.21622	46.5953	7.61786
					-1.21021	46.4871	7.5992
					-1.2042	46.3789	7.58059
					-1.1982	46.2707	7.56203
					-1.19219	46.1625	7.54352
					-1.18619	46.0543	7.52505
					-1.18018	45.9462	7.50664
					-1.17417	45.838	7.48827
					-1.16817	45.7298	7.46995
					-1.16216	45.6216	7.45168
					-1.15616	45.5134	7.43345
					-1.15015	45.4053	7.41528
					-1.14414	45.2971	7.39716
					-1.13814	45.1889	7.37909
					-1.13213	45.0807	7.36107
					-1.12613	44.9725	7.34311
					-1.12012	44.8643	7.32519
					-1.11411	44.7562	7.30733
					-1.10811	44.648	7.28952
					-1.1021	44.5398	7.27176
					-1.0961	44.4316	7.25405
					-1.09009	44.3234	7.2364
					-1.08408	44.2153	7.21881
					-1.07808	44.1071	7.20127
					-1.07207	43.9989	7.18378
					-1.06607	43.8907	7.16635
					-1.06006	43.7825	7.14897
					-1.05405	43.6743	7.13165
					-1.04805	43.5662	7.11439
					-1.04204	43.458	7.09718
					-1.03604	43.3498	7.08003
					-1.03003	43.2416	7.06294
					-1.02402	43.1334	7.04591
					-1.01802	43.0252	7.02894
					-1.01201	42.9171	7.01202
					-1.00601	42.8089	6.99517
					-1	42.7007	6.97837
					-0.993994	42.5925	6.96164
					-0.987988	42.4843	6.94497
					-0.981982	42.3762	6.92835
					-0.975976	42.268	6.9118
					-0.96997	42.1598	6.89531
					-0.963964	42.0516	6.87889
					-0.957958	41.9434	6.86252
					-0.951952	41.8352	6.84623
					-0.945946	41.7271	6.82999
					-0.93994	41.6189	6.81382
					-0.933934	41.5107	6.79771
					-0.927928	41.4025	6.78167
					-0.921922	41.2943	6.7657
					-0.915916	41.1862	6.74979
					-0.90991	41.078	6.73395
					-0.903904	40.9698	6.71817
					-0.897898	40.8616	6.70247
					-0.891892	40.7534	6.68683
					-0.885886	40.6452	6.67126
					-0.87988	40.5371	6.65576
					-0.873874	40.4289	6.64033
					-0.867868	40.3207	6.62496
					-0.861862	40.2125	6.60967
					-0.855856	40.1043	6.59445
					-0.84985	39.9962	6.57931
					-0.843844	39.888	6.56423
					-0.837838	39.7798	6.54923
					-0.831832	39.6716	6.5343
					-0.825826	39.5634	6.51944
					-0.81982	39.4552	6.50466
					-0.813814	39.3471	6.48995
					-0.807808	39.2389	6.47532
					-0.801802	39.1307	6.46076
					-0.795796	39.0225	6.44628
					-0.78979	38.9143	6.43188
					-0.783784	38.8062	6.41755
					-0.777778	38.698	6.4033
					-0.771772	38.5898	6.38913
					-0.765766	38.4816	6.37504
					-0.75976	38.3734	6.36102
					-0.753754	38.2652	6.34709
					-0.747748	38.1571	6.33324
					-0.741742	38.0489	6.31946
					-0.735736	37.9407	6.30577
					-0.72973	37.8325	6.29216
					-0.723724	37.7243	6.27864
					-0.717718	37.6161	6.26519
					-0.711712	37.508	6.25183
					-0.705706	37.3998	6.23856
					-0.6997	37.2916	6.22537
					-0.693694	37.1834	6.21226
					-0.687688	37.0752	6.19924
					-0.681682	36.9671	6.1863
					-0.675676	36.8589	6.17345
					-0.66967	36.7507	6.16069
					-0.663664	36.6425	6.14802
					-0.657658	36.5343	6.13544
					-0.651652	36.4261	6.12294
					-0.645646	36.318	6.11053
					-0.63964	36.2098	6.09822
					-0.633634	36.1016	6.08599
					-0.627628	35.9934	6.07386
					-0.621622	35.8852	6.06182
					-0.615616	35.7771	6.04986
					-0.60961	35.6689	6.03801
					-0.603604	35.5607	6.02624
					-0.597598	35.4525	6.01457
					-0.591592	35.3443	6.00299
					-0.585586	35.2362	5.99151
					-0.57958	35.128	5.98012
					-0.573574	35.0198	5.96883
					-0.567568	34.9116	5.95764
					-0.561562	34.8034	5.94654
					-0.555556	34.6952	5.93554
					-0.54955	34.5871	5.92464
					-0.543543	34.4789	5.91384
					-0.537538	34.3707	5.90314
					-0.531532	34.2625	5.89253
					-0.525525	34.1543	5.88203
					-0.51952	34.0461	5.87163
					-0.513513	33.938	5.86133
					-0.507508	33.8298	5.85113
					-0.501502	33.7216	5.84103
					-0.495495	33.6134	5.83104
					-0.48949	33.5052	5.82115
					-0.483484	33.3971	5.81137
					-0.477477	33.2889	5.80169
					-0.471471	33.1807	5.79211
					-0.465465	33.0725	5.78264
					-0.459459	32.9643	5.77328
					-0.453453	32.8561	5.76402
					-0.447447	32.748	5.75487
					-0.441441	32.6398	5.74583
					-0.435435	32.5316	5.73689
					-0.429429	32.4234	5.72807
					-0.423423	32.3152	5.71935
					-0.417417	32.2071	5.71074
					-0.411411	32.0989	5.70225
					-0.405405	31.9907	5.69386
					-0.399399	31.8825	5.68559
					-0.393393	31.7743	5.67743
					-0.387387	31.6661	5.66938
					-0.381381	31.558	5.66144
					-0.375375	31.4498	5.65361
					-0.369369	31.3416	5.6459
					-0.363363	31.2334	5.63831
					-0.357357	31.1252	5.63082
					-0.351351	31.0171	5.62346
					-0.345345	30.9089	5.6162
					-0.339339	30.8007	5.60907
					-0.333333	30.6925	5.60205
					-0.327327	30.5843	5.59515
					-0.321321	30.4761	5.58836
					-0.315315	30.368	5.58169
					-0.309309	30.2598	5.57514
					-0.303303	30.1516	5.56871
					-0.297297	30.0434	5.5624
					-0.291291	29.9352	5.55621
					-0.285285	29.8271	5.55013
					-0.279279	29.7189	5.54418
					-0.273273	29.6107	5.53835
					-0.267267	29.5025	5.53263
					-0.261261	29.3943	5.52704
					-0.255255	29.2861	5.52157
					-0.249249	29.178	5.51623
					-0.243243	29.0698	5.511
					-0.237237	28.9616	5.5059
					-0.231231	28.8534	5.50092
					-0.225225	28.7452	5.49606
					-0.219219	28.637	5.49133
					-0.213213	28.5289	5.48672
					-0.207207	28.4207	5.48224
					-0.201201	28.3125	5.47788
					-0.195195	28.2043	5.47365
					-0.189189	28.0961	5.46954
					-0.183183	27.988	5.46555
					-0.177177	27.8798	5.46169
					-0.171171	27.7716	5.45796
					-0.165165	27.6634	5.45436
					-0.159159	27.5552	5.45088
					-0.153153	27.447	5.44752
					-0.147147	27.3389	5.4443
					-0.141141	27.2307	5.4412
					-0.135135	27.1225	5.43823
					-0.129129	27.0143	5.43539
					-0.123123	26.9061	5.43267
					-0.117117	26.798	5.43008
					-0.111111	26.6898	5.42762
					-0.105105	26.5816	5.42529
					-0.0990991	26.4734	5.42309
					-0.0930931	26.3652	5.42102
					-0.0870871	26.257	5.41907
					-0.0810811	26.1489	5.41726
					-0.0750751	26.0407	5.41557
					-0.0690691	25.9325	5.41401
					-0.0630631	25.8243	5.41259
					-0.0570571	25.7161	5.41129
					-0.0510511	25.608	5.41012
					-0.045045	25.4998	5.40908
					-0.039039	25.3916	5.40817
					-0.033033	25.2834	5.40739
					-0.027027	25.1752	5.40674
					-0.021021	25.067	5.40622
					-0.015015	24.9589	5.40583
					-0.00900901	24.8507	5.40557
					-0.003003	24.7425	5.40544
					0.003003	24.6343	5.40544
					0.00900901	24.5261	5.40557
					0.015015	24.418	5.40583
					0.021021	24.3098	5.40622
					0.027027	24.2016	5.40674
					0.033033	24.0934	5.40739
					0.039039	23.9852	5.40817
					0.045045	23.877	5.40908
					0.0510511	23.7689	5.41012
					0.0570571	23.6607	5.41129
					0.0630631	23.5525	5.41259
					0.0690691	23.4443	5.41401
					0.0750751	23.3361	5.41557
					0.0810811	23.228	5.41726
					0.0870871	23.1198	5.41907
					0.0930931	23.0116	5.42102
					0.0990991	22.9034	5.42309
					0.105105	22.7952	5.42529
					0.111111	22.687	5.42762
					0.117117	22.5789	5.43008
					0.123123	22.4707	5.43267
					0.129129	22.3625	5.43539
					0.135135	22.2543	5.43823
					0.141141	22.1461	5.4412
					0.147147	22.0379	5.4443
					0.153153	21.9298	5.44752
					0.159159	21.8216	5.45088
					0.165165	21.7134	5.45436
					0.171171	21.6052	5.45796
					0.177177	21.497	5.46169
					0.183183	21.3889	5.46555
					0.189189	21.2807	5.46954
					0.195195	21.1725	5.47365
					0.201201	21.0643	5.47788
					0.207207	20.9561	5.48224
					0.213213	20.8479	5.48672
					0.219219	20.7398	5.49133
					0.225225	20.6316	5.49606
					0.231231	20.5234	5.50092
					0.237237	20.4152	5.5059
					0.243243	20.307	5.511
					0.249249	20.1989	5.51623
					0.255255	20.0907	5.52157
					0.261261	19.9825	5.52704
					0.267267	19.8743	5.53263
					0.273273	19.7661	5.53835
					0.279279	19.6579	5.54418
					0.285285	19.5498	5.55013
					0.291291	19.4416	5.55621
					0.297297	19.3334	5.5624
					0.303303	19.2252	5.56871
					0.309309	19.117	5.57514
					0.315315	19.0089	5.58169
					0.321321	18.9007	5.58836
					0.327327	18.7925	5.59515
					0.333333	18.6843	5.60205
					0.339339	18.5761	5.60907
					0.345345	18.4679	5.6162
					0.351351	18.3598	5.62346
					0.357357	18.2516	5.63082
					0.363363	18.1434	5.63831
					0.369369	18.0352	5.6459
					0.375375	17.927	5.65361
					0.381381	17.8189	5.66144
					0.387387	17.7107	5.66938
					0.393393	17.6025	5.67743
					0.399399	17.4943	5.68559
					0.405405	17.3861	5.69386
					0.411411	17.2779	5.70225
					0.417417	17.1698	5.71074
					0.423423	17.0616	5.71935
					0.429429	16.9534	5.72807
					0.435435	16.8452	5.73689
					0.441441	16.737	5.74583
					0.447447	16.6289	5.75487
					0.453453	16.5207	5.76402
					0.459459	16.4125	5.77328
					0.465465	16.3043	5.78264
					0.471471	16.1961	5.79211
					0.477477	16.0879	5.80169
					0.483484	15.9798	5.81137
					0.48949	15.8716	5.82115
					0.495495	15.7634	5.83104
					0.501502	15.6552	5.84103
					0.507508	15.547	5.85113
					0.513513	15.4389	5.86133
					0.51952	15.3307	5.87163
					0.525525	15.2225	5.88203
					0.531532	15.1143	5.89253
					0.537538	15.0061	5.90314
					0.543543	14.8979	5.91384
					0.54955	14.7898	5.92464
					0.555556	14.6816	5.93554
					0.561562	14.5734	5.94654
					0.567568	14.4652	5.95764
					0.573574	14.357	5.96883
					0.57958	14.2488	5.98012
					0.585586	14.1407	5.99151
					0.591592	14.0325	6.00299
					0.597598	13.9243	6.01457
					0.603604	13.8161	6.02624
					0.60961	13.7079	6.03801
					0.615616	13.5998	6.04986
					0.621622	13.4916	6.06182
					0.627628	13.3834	6.07386
					0.633634	13.2752	6.08599
					0.63964	13.167	6.09822
					0.645646	13.0588	6.11053
					0.651652	12.9507	6.12294
					0.657658	12.8425	6.13544
					0.663664	12.7343	6.14802
					0.66967	12.6261	6.16069
					0.675676	12.5179	6.17345
					0.681682	12.4098	6.1863
					0.687688	12.3016	6.19924
					0.693694	12.1934	6.21226
					0.6997	12.0852	6.22537
					0.705706	11.977	6.23856
					0.711712	11.8688	6.25183
					0.717718	11.7607	6.26519
					0.723724	11.6525	6.27864
					0.72973	11.5443	6.29216
					0.735736	11.4361	6.30577
					0.741742	11.3279	6.31946
					0.747748	11.2198	6.33324
					0.753754	11.1116	6.34709
					0.75976	11.0034	6.36102
					0.765766	10.8952	6.37504
					0.771772	10.787	6.38913
					0.777778	10.6788	6.4033
					0.783784	10.5707	6.41755
					0.78979	10.4625	6.43188
					0.795796	10.3543	6.44628
					0.801802	10.2461	6.46076
					0.807808	10.1379	6.47532
					0.813814	10.0298	6.48995
					0.81982	9.92157	6.50466
					0.825826	9.81339	6.51944
					0.831832	9.70521	6.5343
					0.837838	9.59703	6.54923
					0.843844	9.48884	6.56423
					0.84985	9.38066	6.57931
					0.855856	9.27248	6.59445
					0.861862	9.1643	6.60967
					0.867868	9.05612	6.62496
					0.873874	8.94793	6.64033
					0.87988	8.83975	6.65576
					0.885886	8.73157	6.67126
					0.891892	8.62339	6.68683
					0.897898	8.5152	6.70247
					0.903904	8.40702	6.71817
					0.90991	8.29884	6.73395
					0.915916	8.19066	6.74979
					0.921922	8.08248	6.7657
					0.927928	7.9743	6.78167
					0.933934	7.86611	6.79771
					0.93994	7.75793	6.81382
					0.945946	7.64975	6.82999
					0.951952	7.54157	6.84623
					0.957958	7.43339	6.86252
					0.963964	7.3252	6.87889
					0.96997	7.21702	6.89531
					0.975976	7.10884	6.9118
					0.981982	7.00066	6.92835
					0.987988	6.89248	6.94497
					0.993994	6.78429	6.96164
					1	6.67611	6.97837
					1.00601	6.56793	6.99517
					1.01201	6.45975	7.01202
					1.01802	6.35157	7.02894
					1.02402	6.24338	7.04591
					1.03003	6.1352	7.06294
					1.03604	6.02702	7.08003
					1.04204	5.91884	7.09718
					1.04805	5.81066	7.11439
					1.05405	5.70247	7.13165
					1.06006	5.59429	7.14897
					1.06607	5.48611	7.16635
					1.07207	5.37793	7.18378
					1.07808	5.26975	7.20127
					1.08408	5.16157	7.21881
					1.09009	5.05338	7.2364
					1.0961	4.9452	7.25405
					1.1021	4.83702	7.27176
					1.10811	4.72884	7.28952
					1.11411	4.62066	7.30733
					1.12012	4.51247	7.32519
					1.12613	4.40429	7.34311
					1.13213	4.29611	7.36107
					1.13814	4.18793	7.37909
					1.14414	4.07975	7.39716
					1.15015	3.97156	7.41528
					1.15616	3.86338	7.43345
					1.16216	3.7552	7.45168
					1.16817	3.64702	7.46995
					1.17417	3.53884	7.48827
					1.18018	3.43065	7.50664
					1.18619	3.32247	7.52505
					1.19219	3.21429	7.54352
					1.1982	3.10611	7.56203
					1.2042	2.99793	7.58059
					1.21021	2.88974	7.5992
					1.21622	2.78156	7.61786
					1.22222	2.67338	7.63656
					1.22823	2.5652	7.6553
					1.23423	2.45702	7.6741
					1.24024	2.34883	7.69294
					1.24625	2.24065	7.71182
					1.25225	2.13247	7.73075
					1.25826	2.02429	7.74972
					1.26426	1.91611	7.76874
					1.27027	1.80792	7.7878
					1.27628	1.69974	7.8069
					1.28228	1.59156	7.82605
					1.28829	1.48338	7.84524
					1.29429	1.3752	7.86447
					1.3003	1.26701	7.88375
					1.30631	1.15883	7.90306
					1.31231	1.05065	7.92242
					1.31832	0.942469	7.94182
					1.32432	0.834287	7.96126
					1.33033	0.726105	7.98074
					1.33634	0.617923	8.00027
					1.34234	0.509741	8.01983
					1.34835	0.401559	8.03943
					1.35435	0.293377	8.05907
					1.36036	0.185195	8.07875
					1.36637	0.0770131	8.09847
					1.37237	-0.0311689	8.11823
					1.37838	-0.139351	8.13802
					1.38438	-0.247533	8.15786
					1.39039	-0.355715	8.17773
					1.3964	-0.463897	8.19764
					1.4024	-0.572079	8.21759
					1.40841	-0.680261	8.23757
					1.41441	-0.788443	8.25759
					1.42042	-0.896625	8.27765
					1.42643	-1.00481	8.29774
					1.43243	-1.11299	8.31787
					1.43844	-1.22117	8.33804
					1.44444	-1.32935	8.35824
					1.45045	-1.43753	8.37847
					1.45646	-1.54572	8.39874
					1.46246	-1.6539	8.41905
					1.46847	-1.76208	8.43939
					1.47447	-1.87026	8.45976
					1.48048	-1.97844	8.48017
					1.48649	-2.08663	8.50061
					1.49249	-2.19481	8.52109
					1.4985	-2.30299	8.54159
					1.5045	-2.41117	8.56214
					1.51051	-2.51935	8.58271
					1.51652	-2.62754	8.60332
					1.52252	-2.73572	8.62395
					1.52853	-2.8439	8.64462
					1.53453	-2.95208	8.66533
					1.54054	-3.06026	8.68606
					1.54655	-3.16845	8.70683
					1.55255	-3.27663	8.72762
					1.55856	-3.38481	8.74845
					1.56456	-3.49299	8.7693
					1.57057	-3.60117	8.79019
					1.57658	-3.70936	8.81111
					1.58258	-3.81754	8.83206
					1.58859	-3.92572	8.85304
					1.59459	-4.0339	8.87405
					1.6006	-4.14208	8.89508
					1.60661	-4.25026	8.91615
					1.61261	-4.35845	8.93724
					1.61862	-4.46663	8.95837
					1.62462	-4.57481	8.97952
					1.63063	-4.68299	9.0007
					1.63664	-4.79117	9.02191
					1.64264	-4.89936	9.04315
					1.64865	-5.00754	9.06441
					1.65465	-5.11572	9.08571
					1.66066	-5.2239	9.10703
					1.66667	-5.33208	9.12837
					1.67267	-5.44027	9.14975
					1.67868	-5.54845	9.17115
					1.68468	-5.65663	9.19257
					1.69069	-5.76481	9.21403
					1.6967	-5.87299	9.23551
					1.7027	-5.98118	9.25701
					1.70871	-6.08936	9.27854
					1.71471	-6.19754	9.3001
					1.72072	-6.30572	9.32169
					1.72673	-6.4139	9.34329
					1.73273	-6.52209	9.36493
					1.73874	-6.63027	9.38659
					1.74474	-6.73845	9.40827
					1.75075	-6.84663	9.42998
					1.75676	-6.95481	9.45171
					1.76276	-7.063	9.47347
					1.76877	-7.17118	9.49525
					1.77477	-7.27936	9.51705
					1.78078	-7.38754	9.53888
					1.78679	-7.49572	9.56074
					1.79279	-7.60391	9.58261
					1.7988	-7.71209	9.60451
					1.8048	-7.82027	9.62643
					1.81081	-7.92845	9.64838
					1.81682	-8.03663	9.67035
					1.82282	-8.14481	9.69234
					1.82883	-8.253	9.71435
					1.83483	-8.36118	9.73639
					1.84084	-8.46936	9.75845
					1.84685	-8.57754	9.78053
					1.85285	-8.68572	9.80263
					1.85886	-8.79391	9.82475
					1.86486	-8.90209	9.8469
					1.87087	-9.01027	9.86907
					1.87688	-9.11845	9.89125
					1.88288	-9.22663	9.91347
					1.88889	-9.33482	9.9357
					1.89489	-9.443	9.95795
					1.9009	-9.55118	9.98022
					1.90691	-9.65936	10.0025
					1.91291	-9.76755	10.0248
					1.91892	-9.87573	10.0472
					1.92492	-9.98391	10.0695
					1.93093	-10.0921	10.0919
					1.93694	-10.2003	10.1143
					1.94294	-10.3085	10.1367
					1.94895	-10.4166	10.1591
					1.95495	-10.5248	10.1816
					1.96096	-10.633	10.2041
					1.96697	-10.7412	10.2266
					1.97297	-10.8494	10.2491
					1.97898	-10.9575	10.2716
					1.98498	-11.0657	10.2941
					1.99099	-11.1739	10.3167
					1.997	-11.2821	10.3393
					2.003	-11.3903	10.3619
					2.00901	-11.4985	10.3845
					2.01502	-11.6066	10.4072
					2.02102	-11.7148	10.4298
					2.02703	-11.823	10.4525
					2.03303	-11.9312	10.4752
					2.03904	-12.0394	10.4979
					2.04505	-12.1475	10.5207
					2.05105	-12.2557	10.5434
					2.05706	-12.3639	10.5662
					2.06306	-12.4721	10.589
					2.06907	-12.5803	10.6118
					2.07508	-12.6885	10.6346
					2.08108	-12.7966	10.6574
					2.08709	-12.9048	10.6803
					2.09309	-13.013	10.7031
					2.0991	-13.1212	10.726
					2.10511	-13.2294	10.7489
					2.11111	-13.3375	10.7719
					2.11712	-13.4457	10.7948
					2.12312	-13.5539	10.8177
					2.12913	-13.6621	10.8407
					2.13514	-13.7703	10.8637
					2.14114	-13.8785	10.8867
					2.14715	-13.9866	10.9097
					2.15315	-14.0948	10.9327
					2.15916	-14.203	10.9558
					2.16517	-14.3112	10.9789
					2.17117	-14.4194	11.0019
					2.17718	-14.5276	11.025
					2.18318	-14.6357	11.0481
					2.18919	-14.7439	11.0713
					2.1952	-14.8521	11.0944
					2.2012	-14.9603	11.1176
					2.20721	-15.0685	11.1407
					2.21321	-15.1766	11.1639
					2.21922	-15.2848	11.1871
					2.22523	-15.393	11.2103
					2.23123	-15.5012	11.2336
					2.23724	-15.6094	11.2568
					2.24324	-15.7176	11.2801
					2.24925	-15.8257	11.3033
					2.25526	-15.9339	11.3266
					2.26126	-16.0421	11.3499
					2.26727	-16.1503	11.3733
					2.27327	-16.2585	11.3966
					2.27928	-16.3666	11.4199
					2.28529	-16.4748	11.4433
					2.29129	-16.583	11.4667
					2.2973	-16.6912	11.49
					2.3033	-16.7994	11.5134
					2.30931	-16.9076	11.5368
					2.31532	-17.0157	11.5603
					2.32132	-17.1239	11.5837
					2.32733	-17.2321	11.6072
					2.33333	-17.3403	11.6306
					2.33934	-17.4485	11.6541
					2.34535	-17.5566	11.6776
					2.35135	-17.6648	11.7011
					2.35736	-17.773	11.7246
					2.36336	-17.8812	11.7481
					2.36937	-17.9894	11.7717
					2.37538	-18.0976	11.7952
					2.38138	-18.2057	11.8188
					2.38739	-18.3139	11.8424
					2.39339	-18.4221	11.866
					2.3994	-18.5303	11.8896
					2.40541	-18.6385	11.9132
					2.41141	-18.7466	11.9368
					2.41742	-18.8548	11.9605
					2.42342	-18.963	11.9841
					2.42943	-19.0712	12.0078
					2.43544	-19.1794	12.0314
					2.44144	-19.2876	12.0551
					2.44745	-19.3957	12.0788
					2.45345	-19.5039	12.1025
					2.45946	-19.6121	12.1263
					2.46547	-19.7203	12.15
					2.47147	-19.8285	12.1737
					2.47748	-19.9366	12.1975
					2.48348	-20.0448	12.2213
					2.48949	-20.153	12.2451
					2.4955	-20.2612	12.2688
					2.5015	-20.3694	12.2926
					2.50751	-20.4776	12.3165
					2.51351	-20.5857	12.3403
					2.51952	-20.6939	12.3641
					2.52553	-20.8021	12.388
					2.53153	-20.9103	12.4118
					2.53754	-21.0185	12.4357
					2.54354	-21.1267	12.4596
					2.54955	-21.2348	12.4835
					2.55556	-21.343	12.5074
					2.56156	-21.4512	12.5313
					2.56757	-21.5594	12.5552
					2.57357	-21.6676	12.5791
					2.57958	-21.7757	12.6031
					2.58559	-21.8839	12.627
					2.59159	-21.9921	12.651
					2.5976	-22.1003	12.6749
					2.6036	-22.2085	12.6989
					2.60961	-22.3166	12.7229
					2.61562	-22.4248	12.7469
					2.62162	-22.533	12.7709
					2.62763	-22.6412	12.7949
					2.63363	-22.7494	12.819
					2.63964	-22.8576	12.843
					2.64565	-22.9657	12.8671
					2.65165	-23.0739	12.8911
					2.65766	-23.1821	12.9152
					2.66366	-23.2903	12.9393
					2.66967	-23.3985	12.9634
					2.67568	-23.5067	12.9875
					2.68168	-23.6148	13.0116
					2.68769	-23.723	13.0357
					2.69369	-23.8312	13.0598
					2.6997	-23.9394	13.0839
					2.70571	-24.0476	13.1081
					2.71171	-24.1557	13.1322
					2.71772	-24.2639	13.1564
					2.72372	-24.3721	13.1806
					2.72973	-24.4803	13.2048
					2.73574	-24.5885	13.2289
					2.74174	-24.6967	13.2531
					2.74775	-24.8048	13.2773
					2.75375	-24.913	13.3016
					2.75976	-25.0212	13.3258
					2.76577	-25.1294	13.35
					2.77177	-25.2376	13.3743
					2.77778	-25.3457	13.3985
					2.78378	-25.4539	13.4228
					2.78979	-25.5621	13.447
					2.7958	-25.6703	13.4713
					2.8018	-25.7785	13.4956
					2.80781	-25.8867	13.5199
					2.81381	-25.9948	13.5442
					2.81982	-26.103	13.5685
					2.82583	-26.2112	13.5928
					2.83183	-26.3194	13.6171
					2.83784	-26.4276	13.6415
					2.84384	-26.5357	13.6658
					2.84985	-26.6439	13.6902
					2.85586	-26.7521	13.7145
					2.86186	-26.8603	13.7389
					2.86787	-26.9685	13.7633
					2.87387	-27.0767	13.7876
					2.87988	-27.1848	13.812
					2.88589	-27.293	13.8364
					2.89189	-27.4012	13.8608
					2.8979	-27.5094	13.8853
					2.9039	-27.6176	13.9097
					2.90991	-27.7257	13.9341
					2.91592	-27.8339	13.9585
					2.92192	-27.9421	13.983
					2.92793	-28.0503	14.0074
					2.93393	-28.1585	14.0319
					2.93994	-28.2667	14.0564
					2.94595	-28.3748	14.0808
					2.95195	-28.483	14.1053
					2.95796	-28.5912	14.1298
					2.96396	-28.6994	14.1543
					2.96997	-28.8076	14.1788
					2.97598	-28.9157	14.2033
					2.98198	-29.0239	14.2278
					2.98799	-29.1321	14.2523
					2.99399	-29.2403	14.2769
					3	-29.3485	14.3014

## Sheet: Fig.S4c
scatter point	social engagement score	distractor bias (ms)		fitted curve	social engagement score	distractor bias (ms)	errorbar
	-1	33.6429			-3	62.4176	19.5598
	-1	11.95			-2.99399	62.342	19.5246
	-1	49.6591			-2.98799	62.2665	19.4894
	-1	38.2619			-2.98198	62.191	19.4542
	-1	69.1346			-2.97598	62.1154	19.4189
	-1	79.4444			-2.96997	62.0399	19.3837
	-1	86.8333			-2.96396	61.9644	19.3485
	-1	86.6889			-2.95796	61.8888	19.3133
	-1	85.9565			-2.95195	61.8133	19.2781
	-1	79.7241			-2.94595	61.7378	19.243
	-1	81.1739			-2.93994	61.6622	19.2078
	-1	78.9688			-2.93393	61.5867	19.1726
	-1	64.7143			-2.92793	61.5112	19.1375
	-1	45.5714			-2.92192	61.4356	19.1023
	-1	57.1316			-2.91592	61.3601	19.0672
	-1	64.4571			-2.90991	61.2846	19.032
	-1	70.5			-2.9039	61.209	18.9969
	-1	97.5532			-2.8979	61.1335	18.9618
	-1	77.0286			-2.89189	61.058	18.9267
	-1	94.5641			-2.88589	60.9824	18.8915
	-1	85.0816			-2.87988	60.9069	18.8565
	-1	86.5333			-2.87387	60.8314	18.8214
	-1	109.727			-2.86787	60.7558	18.7863
	-1	76.375			-2.86186	60.6803	18.7512
	-1	40.4103			-2.85586	60.6048	18.7161
	-1	26.2453			-2.84985	60.5292	18.6811
	-1	62.8235			-2.84384	60.4537	18.646
	-1	71.4865			-2.83784	60.3782	18.611
	-1	64.4364			-2.83183	60.3026	18.576
	-1	85.5833			-2.82583	60.2271	18.5409
	-1	62.3421			-2.81982	60.1516	18.5059
	-1	89			-2.81381	60.076	18.4709
	-1	107.143			-2.80781	60.0005	18.4359
	-1	119.458			-2.8018	59.925	18.4009
	-1	45.7692			-2.7958	59.8494	18.3659
	-1	102.5			-2.78979	59.7739	18.331
	1	35.8036			-2.78378	59.6984	18.296
	1	64.2321			-2.77778	59.6228	18.261
	1	59.3509			-2.77177	59.5473	18.2261
	1	58.8286			-2.76577	59.4718	18.1911
	1	22.3284			-2.75976	59.3962	18.1562
	1	42.5972			-2.75375	59.3207	18.1213
	1	50.1364			-2.74775	59.2452	18.0864
	1	63.4792			-2.74174	59.1696	18.0515
	1	47.1045			-2.73574	59.0941	18.0166
	1	24.3571			-2.72973	59.0185	17.9817
	1	33.16			-2.72372	58.943	17.9468
	1	40.6889			-2.71772	58.8675	17.9119
	1	19.6182			-2.71171	58.7919	17.8771
	1	31.2456			-2.70571	58.7164	17.8422
	1	31.6721			-2.6997	58.6409	17.8074
	1	54.75			-2.69369	58.5653	17.7726
	1	12.1452			-2.68769	58.4898	17.7377
	1	-2.15789			-2.68168	58.4143	17.7029
	1	19.037			-2.67568	58.3387	17.6681
	1	9.97872			-2.66967	58.2632	17.6333
	1	38.6522			-2.66366	58.1877	17.5985
	1	23.6765			-2.65766	58.1121	17.5638
	1	6.42857			-2.65165	58.0366	17.529
	1	31.6042			-2.64565	57.9611	17.4943
	1	63.5345			-2.63964	57.8855	17.4595
	1	64.1148			-2.63363	57.81	17.4248
	1	55.9828			-2.62763	57.7345	17.39
	1	54.0667			-2.62162	57.6589	17.3553
	1	65.3824			-2.61562	57.5834	17.3206
	1	64.44			-2.60961	57.5079	17.2859
	1	71.4615			-2.6036	57.4323	17.2512
	1	39.7551			-2.5976	57.3568	17.2166
	1	48.3651			-2.59159	57.2813	17.1819
	1	54.9394			-2.58559	57.2057	17.1473
	1	36.4286			-2.57958	57.1302	17.1126
	1	55.9773			-2.57357	57.0547	17.078
	-1	5.46667			-2.56757	56.9791	17.0434
	-1	-27.1667			-2.56156	56.9036	17.0087
	-1	-7.33929			-2.55556	56.8281	16.9741
	-1	-8.18605			-2.54955	56.7525	16.9396
	-1	-4.57627			-2.54354	56.677	16.905
	-1	5.65			-2.53754	56.6015	16.8704
	-1	3.40625			-2.53153	56.5259	16.8359
	-1	-2.58974			-2.52553	56.4504	16.8013
	-1	37.25			-2.51952	56.3749	16.7668
	-1	1.84211			-2.51351	56.2993	16.7322
	-1	4.39535			-2.50751	56.2238	16.6977
	-1	13.5484			-2.5015	56.1483	16.6632
	-1	10.8605			-2.4955	56.0727	16.6287
	-1	-17.7679			-2.48949	55.9972	16.5943
	-1	-7.38182			-2.48348	55.9217	16.5598
	-1	-1.25			-2.47748	55.8461	16.5253
	-1	2.85965			-2.47147	55.7706	16.4909
	-1	-3.27273			-2.46547	55.6951	16.4565
	-1	-4.32258			-2.45946	55.6195	16.4221
	-1	-16.225			-2.45345	55.544	16.3876
	-1	5.46154			-2.44745	55.4685	16.3532
	-1	-12.3125			-2.44144	55.3929	16.3189
	-1	9.65306			-2.43544	55.3174	16.2845
	-1	-18.5556			-2.42943	55.2419	16.2501
	-1	19.6905			-2.42342	55.1663	16.2158
	-1	0.188679			-2.41742	55.0908	16.1815
	-1	2.92727			-2.41141	55.0153	16.1471
	-1	16.8372			-2.40541	54.9397	16.1128
	-1	8.40323			-2.3994	54.8642	16.0785
	-1	22.5862			-2.39339	54.7887	16.0442
	-1	10.3438			-2.38739	54.7131	16.01
	-1	15.7179			-2.38138	54.6376	15.9757
	-1	9.16667			-2.37538	54.562	15.9415
	-1	-14.825			-2.36937	54.4865	15.9072
	-1	8.4			-2.36336	54.411	15.873
	-1	26.3077			-2.35736	54.3355	15.8388
	1	-61.5			-2.35135	54.2599	15.8046
	1	-64.4062			-2.34535	54.1844	15.7704
	1	-41.3778			-2.33934	54.1088	15.7363
	1	-20.1633			-2.33333	54.0333	15.7021
	1	-22.2698			-2.32733	53.9578	15.668
	1	-23.7385			-2.32132	53.8822	15.6339
	1	-26.5686			-2.31532	53.8067	15.5997
	1	-26.9804			-2.30931	53.7312	15.5656
	1	-5.98148			-2.3033	53.6556	15.5316
	1	-0.0571429			-2.2973	53.5801	15.4975
	1	-12.1579			-2.29129	53.5046	15.4634
	1	-16.1111			-2.28529	53.429	15.4294
	1	-32.2128			-2.27928	53.3535	15.3954
	1	-26.2586			-2.27327	53.278	15.3614
	1	-6.97619			-2.26727	53.2024	15.3274
	1	-17.8298			-2.26126	53.1269	15.2934
	1	15.129			-2.25526	53.0514	15.2594
	1	0.344262			-2.24925	52.9758	15.2255
	1	-15.1373			-2.24324	52.9003	15.1915
	1	-18.617			-2.23724	52.8248	15.1576
	1	-8.39583			-2.23123	52.7492	15.1237
	1	-18.5806			-2.22523	52.6737	15.0898
	1	-0.84127			-2.21922	52.5982	15.0559
	1	-11.4565			-2.21321	52.5226	15.0221
	1	-56.4			-2.20721	52.4471	14.9882
	1	-21.9818			-2.2012	52.3716	14.9544
	1	-26.5319			-2.1952	52.296	14.9206
	1	-27.2			-2.18919	52.2205	14.8868
	1	-3.2069			-2.18318	52.145	14.853
	1	-6.10606			-2.17718	52.0694	14.8192
	1	-8.30769			-2.17117	51.9939	14.7855
	1	-1.86			-2.16517	51.9184	14.7517
	1	-8.55769			-2.15916	51.8428	14.718
	1	19.2857			-2.15315	51.7673	14.6843
	1	-19.6441			-2.14715	51.6918	14.6506
	1	1.55556			-2.14114	51.6162	14.617
					-2.13514	51.5407	14.5833
					-2.12913	51.4652	14.5497
					-2.12312	51.3896	14.5161
					-2.11712	51.3141	14.4825
					-2.11111	51.2386	14.4489
					-2.10511	51.163	14.4153
					-2.0991	51.0875	14.3818
					-2.09309	51.012	14.3482
					-2.08709	50.9364	14.3147
					-2.08108	50.8609	14.2812
					-2.07508	50.7854	14.2478
					-2.06907	50.7098	14.2143
					-2.06306	50.6343	14.1809
					-2.05706	50.5588	14.1474
					-2.05105	50.4832	14.114
					-2.04505	50.4077	14.0807
					-2.03904	50.3322	14.0473
					-2.03303	50.2566	14.0139
					-2.02703	50.1811	13.9806
					-2.02102	50.1056	13.9473
					-2.01502	50.03	13.914
					-2.00901	49.9545	13.8808
					-2.003	49.879	13.8475
					-1.997	49.8034	13.8143
					-1.99099	49.7279	13.7811
					-1.98498	49.6523	13.7479
					-1.97898	49.5768	13.7147
					-1.97297	49.5013	13.6816
					-1.96697	49.4257	13.6485
					-1.96096	49.3502	13.6154
					-1.95495	49.2747	13.5823
					-1.94895	49.1991	13.5492
					-1.94294	49.1236	13.5162
					-1.93694	49.0481	13.4831
					-1.93093	48.9725	13.4501
					-1.92492	48.897	13.4172
					-1.91892	48.8215	13.3842
					-1.91291	48.7459	13.3513
					-1.90691	48.6704	13.3184
					-1.9009	48.5949	13.2855
					-1.89489	48.5193	13.2526
					-1.88889	48.4438	13.2198
					-1.88288	48.3683	13.1869
					-1.87688	48.2927	13.1541
					-1.87087	48.2172	13.1214
					-1.86486	48.1417	13.0886
					-1.85886	48.0661	13.0559
					-1.85285	47.9906	13.0232
					-1.84685	47.9151	12.9905
					-1.84084	47.8395	12.9579
					-1.83483	47.764	12.9252
					-1.82883	47.6885	12.8926
					-1.82282	47.6129	12.86
					-1.81682	47.5374	12.8275
					-1.81081	47.4619	12.7949
					-1.8048	47.3863	12.7624
					-1.7988	47.3108	12.73
					-1.79279	47.2353	12.6975
					-1.78679	47.1597	12.6651
					-1.78078	47.0842	12.6327
					-1.77477	47.0087	12.6003
					-1.76877	46.9331	12.5679
					-1.76276	46.8576	12.5356
					-1.75676	46.7821	12.5033
					-1.75075	46.7065	12.471
					-1.74474	46.631	12.4388
					-1.73874	46.5555	12.4066
					-1.73273	46.4799	12.3744
					-1.72673	46.4044	12.3422
					-1.72072	46.3289	12.3101
					-1.71471	46.2533	12.278
					-1.70871	46.1778	12.2459
					-1.7027	46.1023	12.2139
					-1.6967	46.0267	12.1818
					-1.69069	45.9512	12.1499
					-1.68468	45.8757	12.1179
					-1.67868	45.8001	12.086
					-1.67267	45.7246	12.0541
					-1.66667	45.6491	12.0222
					-1.66066	45.5735	11.9904
					-1.65465	45.498	11.9585
					-1.64865	45.4225	11.9268
					-1.64264	45.3469	11.895
					-1.63664	45.2714	11.8633
					-1.63063	45.1959	11.8316
					-1.62462	45.1203	11.8
					-1.61862	45.0448	11.7683
					-1.61261	44.9693	11.7368
					-1.60661	44.8937	11.7052
					-1.6006	44.8182	11.6737
					-1.59459	44.7426	11.6422
					-1.58859	44.6671	11.6107
					-1.58258	44.5916	11.5793
					-1.57658	44.516	11.5479
					-1.57057	44.4405	11.5166
					-1.56456	44.365	11.4852
					-1.55856	44.2894	11.454
					-1.55255	44.2139	11.4227
					-1.54655	44.1384	11.3915
					-1.54054	44.0628	11.3603
					-1.53453	43.9873	11.3292
					-1.52853	43.9118	11.2981
					-1.52252	43.8362	11.267
					-1.51652	43.7607	11.236
					-1.51051	43.6852	11.205
					-1.5045	43.6096	11.174
					-1.4985	43.5341	11.1431
					-1.49249	43.4586	11.1122
					-1.48649	43.383	11.0814
					-1.48048	43.3075	11.0506
					-1.47447	43.232	11.0198
					-1.46847	43.1564	10.9891
					-1.46246	43.0809	10.9584
					-1.45646	43.0054	10.9278
					-1.45045	42.9298	10.8971
					-1.44444	42.8543	10.8666
					-1.43844	42.7788	10.8361
					-1.43243	42.7032	10.8056
					-1.42643	42.6277	10.7751
					-1.42042	42.5522	10.7447
					-1.41441	42.4766	10.7144
					-1.40841	42.4011	10.6841
					-1.4024	42.3256	10.6538
					-1.3964	42.25	10.6236
					-1.39039	42.1745	10.5934
					-1.38438	42.099	10.5633
					-1.37838	42.0234	10.5332
					-1.37237	41.9479	10.5031
					-1.36637	41.8724	10.4731
					-1.36036	41.7968	10.4432
					-1.35435	41.7213	10.4133
					-1.34835	41.6458	10.3834
					-1.34234	41.5702	10.3536
					-1.33634	41.4947	10.3238
					-1.33033	41.4192	10.2941
					-1.32432	41.3436	10.2644
					-1.31832	41.2681	10.2348
					-1.31231	41.1926	10.2052
					-1.30631	41.117	10.1757
					-1.3003	41.0415	10.1462
					-1.29429	40.966	10.1168
					-1.28829	40.8904	10.0874
					-1.28228	40.8149	10.0581
					-1.27628	40.7394	10.0288
					-1.27027	40.6638	9.99963
					-1.26426	40.5883	9.97047
					-1.25826	40.5128	9.94136
					-1.25225	40.4372	9.9123
					-1.24625	40.3617	9.8833
					-1.24024	40.2861	9.85435
					-1.23423	40.2106	9.82546
					-1.22823	40.1351	9.79662
					-1.22222	40.0595	9.76784
					-1.21622	39.984	9.73912
					-1.21021	39.9085	9.71045
					-1.2042	39.8329	9.68184
					-1.1982	39.7574	9.65329
					-1.19219	39.6819	9.6248
					-1.18619	39.6063	9.59637
					-1.18018	39.5308	9.568
					-1.17417	39.4553	9.53968
					-1.16817	39.3797	9.51143
					-1.16216	39.3042	9.48324
					-1.15616	39.2287	9.45511
					-1.15015	39.1531	9.42705
					-1.14414	39.0776	9.39904
					-1.13814	39.0021	9.3711
					-1.13213	38.9265	9.34323
					-1.12613	38.851	9.31542
					-1.12012	38.7755	9.28767
					-1.11411	38.6999	9.25999
					-1.10811	38.6244	9.23238
					-1.1021	38.5489	9.20483
					-1.0961	38.4733	9.17736
					-1.09009	38.3978	9.14995
					-1.08408	38.3223	9.12261
					-1.07808	38.2467	9.09533
					-1.07207	38.1712	9.06813
					-1.06607	38.0957	9.041
					-1.06006	38.0201	9.01394
					-1.05405	37.9446	8.98696
					-1.04805	37.8691	8.96004
					-1.04204	37.7935	8.9332
					-1.03604	37.718	8.90644
					-1.03003	37.6425	8.87974
					-1.02402	37.5669	8.85313
					-1.01802	37.4914	8.82659
					-1.01201	37.4159	8.80012
					-1.00601	37.3403	8.77374
					-1	37.2648	8.74743
					-0.993994	37.1893	8.7212
					-0.987988	37.1137	8.69505
					-0.981982	37.0382	8.66898
					-0.975976	36.9627	8.643
					-0.96997	36.8871	8.61709
					-0.963964	36.8116	8.59126
					-0.957958	36.7361	8.56552
					-0.951952	36.6605	8.53987
					-0.945946	36.585	8.5143
					-0.93994	36.5095	8.48881
					-0.933934	36.4339	8.46341
					-0.927928	36.3584	8.4381
					-0.921922	36.2829	8.41287
					-0.915916	36.2073	8.38774
					-0.90991	36.1318	8.36269
					-0.903904	36.0563	8.33773
					-0.897898	35.9807	8.31287
					-0.891892	35.9052	8.28809
					-0.885886	35.8297	8.26341
					-0.87988	35.7541	8.23883
					-0.873874	35.6786	8.21433
					-0.867868	35.6031	8.18994
					-0.861862	35.5275	8.16563
					-0.855856	35.452	8.14143
					-0.84985	35.3764	8.11732
					-0.843844	35.3009	8.09332
					-0.837838	35.2254	8.06941
					-0.831832	35.1499	8.0456
					-0.825826	35.0743	8.02189
					-0.81982	34.9988	7.99829
					-0.813814	34.9232	7.97479
					-0.807808	34.8477	7.95139
					-0.801802	34.7722	7.9281
					-0.795796	34.6966	7.90492
					-0.78979	34.6211	7.88184
					-0.783784	34.5456	7.85887
					-0.777778	34.47	7.836
					-0.771772	34.3945	7.81325
					-0.765766	34.319	7.79061
					-0.75976	34.2434	7.76808
					-0.753754	34.1679	7.74566
					-0.747748	34.0924	7.72336
					-0.741742	34.0168	7.70117
					-0.735736	33.9413	7.6791
					-0.72973	33.8658	7.65714
					-0.723724	33.7902	7.6353
					-0.717718	33.7147	7.61358
					-0.711712	33.6392	7.59198
					-0.705706	33.5636	7.5705
					-0.6997	33.4881	7.54914
					-0.693694	33.4126	7.5279
					-0.687688	33.337	7.50679
					-0.681682	33.2615	7.4858
					-0.675676	33.186	7.46494
					-0.66967	33.1104	7.44421
					-0.663664	33.0349	7.4236
					-0.657658	32.9594	7.40312
					-0.651652	32.8838	7.38277
					-0.645646	32.8083	7.36256
					-0.63964	32.7328	7.34247
					-0.633634	32.6572	7.32252
					-0.627628	32.5817	7.30271
					-0.621622	32.5062	7.28303
					-0.615616	32.4306	7.26348
					-0.60961	32.3551	7.24408
					-0.603604	32.2796	7.22481
					-0.597598	32.204	7.20568
					-0.591592	32.1285	7.1867
					-0.585586	32.053	7.16785
					-0.57958	31.9774	7.14915
					-0.573574	31.9019	7.13059
					-0.567568	31.8264	7.11219
					-0.561562	31.7508	7.09392
					-0.555556	31.6753	7.07581
					-0.54955	31.5998	7.05784
					-0.543543	31.5242	7.04002
					-0.537538	31.4487	7.02236
					-0.531532	31.3732	7.00485
					-0.525525	31.2976	6.98749
					-0.51952	31.2221	6.97028
					-0.513513	31.1466	6.95323
					-0.507508	31.071	6.93634
					-0.501502	30.9955	6.91961
					-0.495495	30.92	6.90304
					-0.48949	30.8444	6.88662
					-0.483484	30.7689	6.87037
					-0.477477	30.6933	6.85428
					-0.471471	30.6178	6.83836
					-0.465465	30.5423	6.8226
					-0.459459	30.4668	6.807
					-0.453453	30.3912	6.79158
					-0.447447	30.3157	6.77632
					-0.441441	30.2401	6.76123
					-0.435435	30.1646	6.74632
					-0.429429	30.0891	6.73157
					-0.423423	30.0135	6.717
					-0.417417	29.938	6.7026
					-0.411411	29.8625	6.68838
					-0.405405	29.7869	6.67433
					-0.399399	29.7114	6.66047
					-0.393393	29.6359	6.64678
					-0.387387	29.5603	6.63327
					-0.381381	29.4848	6.61994
					-0.375375	29.4093	6.60679
					-0.369369	29.3337	6.59383
					-0.363363	29.2582	6.58105
					-0.357357	29.1827	6.56845
					-0.351351	29.1071	6.55605
					-0.345345	29.0316	6.54382
					-0.339339	28.9561	6.53179
					-0.333333	28.8805	6.51995
					-0.327327	28.805	6.5083
					-0.321321	28.7295	6.49684
					-0.315315	28.6539	6.48557
					-0.309309	28.5784	6.47449
					-0.303303	28.5029	6.46361
					-0.297297	28.4273	6.45293
					-0.291291	28.3518	6.44244
					-0.285285	28.2763	6.43215
					-0.279279	28.2007	6.42206
					-0.273273	28.1252	6.41216
					-0.267267	28.0497	6.40247
					-0.261261	27.9741	6.39298
					-0.255255	27.8986	6.38369
					-0.249249	27.8231	6.37461
					-0.243243	27.7475	6.36572
					-0.237237	27.672	6.35705
					-0.231231	27.5965	6.34857
					-0.225225	27.5209	6.34031
					-0.219219	27.4454	6.33225
					-0.213213	27.3699	6.3244
					-0.207207	27.2943	6.31676
					-0.201201	27.2188	6.30932
					-0.195195	27.1433	6.3021
					-0.189189	27.0677	6.29509
					-0.183183	26.9922	6.28829
					-0.177177	26.9167	6.2817
					-0.171171	26.8411	6.27533
					-0.165165	26.7656	6.26917
					-0.159159	26.6901	6.26322
					-0.153153	26.6145	6.25749
					-0.147147	26.539	6.25197
					-0.141141	26.4635	6.24667
					-0.135135	26.3879	6.24159
					-0.129129	26.3124	6.23672
					-0.123123	26.2369	6.23207
					-0.117117	26.1613	6.22764
					-0.111111	26.0858	6.22343
					-0.105105	26.0102	6.21944
					-0.0990991	25.9347	6.21567
					-0.0930931	25.8592	6.21211
					-0.0870871	25.7837	6.20878
					-0.0810811	25.7081	6.20567
					-0.0750751	25.6326	6.20277
					-0.0690691	25.557	6.2001
					-0.0630631	25.4815	6.19765
					-0.0570571	25.406	6.19543
					-0.0510511	25.3304	6.19342
					-0.045045	25.2549	6.19164
					-0.039039	25.1794	6.19008
					-0.033033	25.1038	6.18874
					-0.027027	25.0283	6.18763
					-0.021021	24.9528	6.18673
					-0.015015	24.8772	6.18606
					-0.00900901	24.8017	6.18562
					-0.003003	24.7262	6.18539
					0.003003	24.6506	6.18539
					0.00900901	24.5751	6.18562
					0.015015	24.4996	6.18606
					0.021021	24.424	6.18673
					0.027027	24.3485	6.18763
					0.033033	24.273	6.18874
					0.039039	24.1974	6.19008
					0.045045	24.1219	6.19164
					0.0510511	24.0464	6.19342
					0.0570571	23.9708	6.19543
					0.0630631	23.8953	6.19765
					0.0690691	23.8198	6.2001
					0.0750751	23.7442	6.20277
					0.0810811	23.6687	6.20567
					0.0870871	23.5932	6.20878
					0.0930931	23.5176	6.21211
					0.0990991	23.4421	6.21567
					0.105105	23.3666	6.21944
					0.111111	23.291	6.22343
					0.117117	23.2155	6.22764
					0.123123	23.14	6.23207
					0.129129	23.0644	6.23672
					0.135135	22.9889	6.24159
					0.141141	22.9134	6.24667
					0.147147	22.8378	6.25197
					0.153153	22.7623	6.25749
					0.159159	22.6868	6.26322
					0.165165	22.6112	6.26917
					0.171171	22.5357	6.27533
					0.177177	22.4602	6.2817
					0.183183	22.3846	6.28829
					0.189189	22.3091	6.29509
					0.195195	22.2336	6.3021
					0.201201	22.158	6.30932
					0.207207	22.0825	6.31676
					0.213213	22.007	6.3244
					0.219219	21.9314	6.33225
					0.225225	21.8559	6.34031
					0.231231	21.7804	6.34857
					0.237237	21.7048	6.35705
					0.243243	21.6293	6.36572
					0.249249	21.5538	6.37461
					0.255255	21.4782	6.38369
					0.261261	21.4027	6.39298
					0.267267	21.3271	6.40247
					0.273273	21.2516	6.41216
					0.279279	21.1761	6.42206
					0.285285	21.1005	6.43215
					0.291291	21.025	6.44244
					0.297297	20.9495	6.45293
					0.303303	20.8739	6.46361
					0.309309	20.7984	6.47449
					0.315315	20.7229	6.48557
					0.321321	20.6473	6.49684
					0.327327	20.5718	6.5083
					0.333333	20.4963	6.51995
					0.339339	20.4207	6.53179
					0.345345	20.3452	6.54382
					0.351351	20.2697	6.55605
					0.357357	20.1941	6.56845
					0.363363	20.1186	6.58105
					0.369369	20.0431	6.59383
					0.375375	19.9675	6.60679
					0.381381	19.892	6.61994
					0.387387	19.8165	6.63327
					0.393393	19.7409	6.64678
					0.399399	19.6654	6.66047
					0.405405	19.5899	6.67433
					0.411411	19.5143	6.68838
					0.417417	19.4388	6.7026
					0.423423	19.3633	6.717
					0.429429	19.2877	6.73157
					0.435435	19.2122	6.74632
					0.441441	19.1367	6.76123
					0.447447	19.0611	6.77632
					0.453453	18.9856	6.79158
					0.459459	18.9101	6.807
					0.465465	18.8345	6.8226
					0.471471	18.759	6.83836
					0.477477	18.6835	6.85428
					0.483484	18.6079	6.87037
					0.48949	18.5324	6.88662
					0.495495	18.4569	6.90304
					0.501502	18.3813	6.91961
					0.507508	18.3058	6.93634
					0.513513	18.2303	6.95323
					0.51952	18.1547	6.97028
					0.525525	18.0792	6.98749
					0.531532	18.0037	7.00485
					0.537538	17.9281	7.02236
					0.543543	17.8526	7.04002
					0.54955	17.7771	7.05784
					0.555556	17.7015	7.07581
					0.561562	17.626	7.09392
					0.567568	17.5505	7.11219
					0.573574	17.4749	7.13059
					0.57958	17.3994	7.14915
					0.585586	17.3239	7.16785
					0.591592	17.2483	7.1867
					0.597598	17.1728	7.20568
					0.603604	17.0973	7.22481
					0.60961	17.0217	7.24408
					0.615616	16.9462	7.26348
					0.621622	16.8707	7.28303
					0.627628	16.7951	7.30271
					0.633634	16.7196	7.32252
					0.63964	16.6441	7.34247
					0.645646	16.5685	7.36256
					0.651652	16.493	7.38277
					0.657658	16.4174	7.40312
					0.663664	16.3419	7.4236
					0.66967	16.2664	7.44421
					0.675676	16.1908	7.46494
					0.681682	16.1153	7.4858
					0.687688	16.0398	7.50679
					0.693694	15.9642	7.5279
					0.6997	15.8887	7.54914
					0.705706	15.8132	7.5705
					0.711712	15.7376	7.59198
					0.717718	15.6621	7.61358
					0.723724	15.5866	7.6353
					0.72973	15.511	7.65714
					0.735736	15.4355	7.6791
					0.741742	15.36	7.70117
					0.747748	15.2844	7.72336
					0.753754	15.2089	7.74566
					0.75976	15.1334	7.76808
					0.765766	15.0578	7.79061
					0.771772	14.9823	7.81325
					0.777778	14.9068	7.836
					0.783784	14.8312	7.85887
					0.78979	14.7557	7.88184
					0.795796	14.6802	7.90492
					0.801802	14.6046	7.9281
					0.807808	14.5291	7.95139
					0.813814	14.4536	7.97479
					0.81982	14.378	7.99829
					0.825826	14.3025	8.02189
					0.831832	14.227	8.0456
					0.837838	14.1514	8.06941
					0.843844	14.0759	8.09332
					0.84985	14.0004	8.11732
					0.855856	13.9248	8.14143
					0.861862	13.8493	8.16563
					0.867868	13.7738	8.18994
					0.873874	13.6982	8.21433
					0.87988	13.6227	8.23883
					0.885886	13.5472	8.26341
					0.891892	13.4716	8.28809
					0.897898	13.3961	8.31287
					0.903904	13.3206	8.33773
					0.90991	13.245	8.36269
					0.915916	13.1695	8.38774
					0.921922	13.094	8.41287
					0.927928	13.0184	8.4381
					0.933934	12.9429	8.46341
					0.93994	12.8674	8.48881
					0.945946	12.7918	8.5143
					0.951952	12.7163	8.53987
					0.957958	12.6408	8.56552
					0.963964	12.5652	8.59126
					0.96997	12.4897	8.61709
					0.975976	12.4142	8.643
					0.981982	12.3386	8.66898
					0.987988	12.2631	8.69505
					0.993994	12.1876	8.7212
					1	12.112	8.74743
					1.00601	12.0365	8.77374
					1.01201	11.961	8.80012
					1.01802	11.8854	8.82659
					1.02402	11.8099	8.85313
					1.03003	11.7343	8.87974
					1.03604	11.6588	8.90644
					1.04204	11.5833	8.9332
					1.04805	11.5077	8.96004
					1.05405	11.4322	8.98696
					1.06006	11.3567	9.01394
					1.06607	11.2811	9.041
					1.07207	11.2056	9.06813
					1.07808	11.1301	9.09533
					1.08408	11.0545	9.12261
					1.09009	10.979	9.14995
					1.0961	10.9035	9.17736
					1.1021	10.8279	9.20483
					1.10811	10.7524	9.23238
					1.11411	10.6769	9.25999
					1.12012	10.6013	9.28767
					1.12613	10.5258	9.31542
					1.13213	10.4503	9.34323
					1.13814	10.3747	9.3711
					1.14414	10.2992	9.39904
					1.15015	10.2237	9.42705
					1.15616	10.1481	9.45511
					1.16216	10.0726	9.48324
					1.16817	9.99707	9.51143
					1.17417	9.92154	9.53968
					1.18018	9.846	9.568
					1.18619	9.77047	9.59637
					1.19219	9.69493	9.6248
					1.1982	9.6194	9.65329
					1.2042	9.54387	9.68184
					1.21021	9.46833	9.71045
					1.21622	9.3928	9.73912
					1.22222	9.31727	9.76784
					1.22823	9.24173	9.79662
					1.23423	9.1662	9.82546
					1.24024	9.09066	9.85435
					1.24625	9.01513	9.8833
					1.25225	8.9396	9.9123
					1.25826	8.86406	9.94136
					1.26426	8.78853	9.97047
					1.27027	8.71299	9.99963
					1.27628	8.63746	10.0288
					1.28228	8.56193	10.0581
					1.28829	8.48639	10.0874
					1.29429	8.41086	10.1168
					1.3003	8.33532	10.1462
					1.30631	8.25979	10.1757
					1.31231	8.18426	10.2052
					1.31832	8.10872	10.2348
					1.32432	8.03319	10.2644
					1.33033	7.95766	10.2941
					1.33634	7.88212	10.3238
					1.34234	7.80659	10.3536
					1.34835	7.73105	10.3834
					1.35435	7.65552	10.4133
					1.36036	7.57999	10.4432
					1.36637	7.50445	10.4731
					1.37237	7.42892	10.5031
					1.37838	7.35339	10.5332
					1.38438	7.27785	10.5633
					1.39039	7.20232	10.5934
					1.3964	7.12678	10.6236
					1.4024	7.05125	10.6538
					1.40841	6.97572	10.6841
					1.41441	6.90018	10.7144
					1.42042	6.82465	10.7447
					1.42643	6.74911	10.7751
					1.43243	6.67358	10.8056
					1.43844	6.59805	10.8361
					1.44444	6.52251	10.8666
					1.45045	6.44698	10.8971
					1.45646	6.37144	10.9278
					1.46246	6.29591	10.9584
					1.46847	6.22038	10.9891
					1.47447	6.14484	11.0198
					1.48048	6.06931	11.0506
					1.48649	5.99378	11.0814
					1.49249	5.91824	11.1122
					1.4985	5.84271	11.1431
					1.5045	5.76717	11.174
					1.51051	5.69164	11.205
					1.51652	5.61611	11.236
					1.52252	5.54057	11.267
					1.52853	5.46504	11.2981
					1.53453	5.3895	11.3292
					1.54054	5.31397	11.3603
					1.54655	5.23844	11.3915
					1.55255	5.1629	11.4227
					1.55856	5.08737	11.454
					1.56456	5.01184	11.4852
					1.57057	4.9363	11.5166
					1.57658	4.86077	11.5479
					1.58258	4.78523	11.5793
					1.58859	4.7097	11.6107
					1.59459	4.63417	11.6422
					1.6006	4.55863	11.6737
					1.60661	4.4831	11.7052
					1.61261	4.40756	11.7368
					1.61862	4.33203	11.7683
					1.62462	4.2565	11.8
					1.63063	4.18096	11.8316
					1.63664	4.10543	11.8633
					1.64264	4.0299	11.895
					1.64865	3.95436	11.9268
					1.65465	3.87883	11.9585
					1.66066	3.80329	11.9904
					1.66667	3.72776	12.0222
					1.67267	3.65223	12.0541
					1.67868	3.57669	12.086
					1.68468	3.50116	12.1179
					1.69069	3.42562	12.1499
					1.6967	3.35009	12.1818
					1.7027	3.27456	12.2139
					1.70871	3.19902	12.2459
					1.71471	3.12349	12.278
					1.72072	3.04795	12.3101
					1.72673	2.97242	12.3422
					1.73273	2.89689	12.3744
					1.73874	2.82135	12.4066
					1.74474	2.74582	12.4388
					1.75075	2.67029	12.471
					1.75676	2.59475	12.5033
					1.76276	2.51922	12.5356
					1.76877	2.44368	12.5679
					1.77477	2.36815	12.6003
					1.78078	2.29262	12.6327
					1.78679	2.21708	12.6651
					1.79279	2.14155	12.6975
					1.7988	2.06601	12.73
					1.8048	1.99048	12.7624
					1.81081	1.91495	12.7949
					1.81682	1.83941	12.8275
					1.82282	1.76388	12.86
					1.82883	1.68835	12.8926
					1.83483	1.61281	12.9252
					1.84084	1.53728	12.9579
					1.84685	1.46174	12.9905
					1.85285	1.38621	13.0232
					1.85886	1.31068	13.0559
					1.86486	1.23514	13.0886
					1.87087	1.15961	13.1214
					1.87688	1.08407	13.1541
					1.88288	1.00854	13.1869
					1.88889	0.933007	13.2198
					1.89489	0.857473	13.2526
					1.9009	0.781939	13.2855
					1.90691	0.706405	13.3184
					1.91291	0.630871	13.3513
					1.91892	0.555337	13.3842
					1.92492	0.479804	13.4172
					1.93093	0.40427	13.4501
					1.93694	0.328736	13.4831
					1.94294	0.253202	13.5162
					1.94895	0.177668	13.5492
					1.95495	0.102134	13.5823
					1.96096	0.0266003	13.6154
					1.96697	-0.0489335	13.6485
					1.97297	-0.124467	13.6816
					1.97898	-0.200001	13.7147
					1.98498	-0.275535	13.7479
					1.99099	-0.351069	13.7811
					1.997	-0.426603	13.8143
					2.003	-0.502137	13.8475
					2.00901	-0.577671	13.8808
					2.01502	-0.653204	13.914
					2.02102	-0.728738	13.9473
					2.02703	-0.804272	13.9806
					2.03303	-0.879806	14.0139
					2.03904	-0.95534	14.0473
					2.04505	-1.03087	14.0807
					2.05105	-1.10641	14.114
					2.05706	-1.18194	14.1474
					2.06306	-1.25748	14.1809
					2.06907	-1.33301	14.2143
					2.07508	-1.40854	14.2478
					2.08108	-1.48408	14.2812
					2.08709	-1.55961	14.3147
					2.09309	-1.63514	14.3482
					2.0991	-1.71068	14.3818
					2.10511	-1.78621	14.4153
					2.11111	-1.86175	14.4489
					2.11712	-1.93728	14.4825
					2.12312	-2.01281	14.5161
					2.12913	-2.08835	14.5497
					2.13514	-2.16388	14.5833
					2.14114	-2.23942	14.617
					2.14715	-2.31495	14.6506
					2.15315	-2.39048	14.6843
					2.15916	-2.46602	14.718
					2.16517	-2.54155	14.7517
					2.17117	-2.61708	14.7855
					2.17718	-2.69262	14.8192
					2.18318	-2.76815	14.853
					2.18919	-2.84369	14.8868
					2.1952	-2.91922	14.9206
					2.2012	-2.99475	14.9544
					2.20721	-3.07029	14.9882
					2.21321	-3.14582	15.0221
					2.21922	-3.22136	15.0559
					2.22523	-3.29689	15.0898
					2.23123	-3.37242	15.1237
					2.23724	-3.44796	15.1576
					2.24324	-3.52349	15.1915
					2.24925	-3.59903	15.2255
					2.25526	-3.67456	15.2594
					2.26126	-3.75009	15.2934
					2.26727	-3.82563	15.3274
					2.27327	-3.90116	15.3614
					2.27928	-3.97669	15.3954
					2.28529	-4.05223	15.4294
					2.29129	-4.12776	15.4634
					2.2973	-4.2033	15.4975
					2.3033	-4.27883	15.5316
					2.30931	-4.35436	15.5656
					2.31532	-4.4299	15.5997
					2.32132	-4.50543	15.6339
					2.32733	-4.58097	15.668
					2.33333	-4.6565	15.7021
					2.33934	-4.73203	15.7363
					2.34535	-4.80757	15.7704
					2.35135	-4.8831	15.8046
					2.35736	-4.95864	15.8388
					2.36336	-5.03417	15.873
					2.36937	-5.1097	15.9072
					2.37538	-5.18524	15.9415
					2.38138	-5.26077	15.9757
					2.38739	-5.3363	16.01
					2.39339	-5.41184	16.0442
					2.3994	-5.48737	16.0785
					2.40541	-5.56291	16.1128
					2.41141	-5.63844	16.1471
					2.41742	-5.71397	16.1815
					2.42342	-5.78951	16.2158
					2.42943	-5.86504	16.2501
					2.43544	-5.94057	16.2845
					2.44144	-6.01611	16.3189
					2.44745	-6.09164	16.3532
					2.45345	-6.16718	16.3876
					2.45946	-6.24271	16.4221
					2.46547	-6.31824	16.4565
					2.47147	-6.39378	16.4909
					2.47748	-6.46931	16.5253
					2.48348	-6.54485	16.5598
					2.48949	-6.62038	16.5943
					2.4955	-6.69591	16.6287
					2.5015	-6.77145	16.6632
					2.50751	-6.84698	16.6977
					2.51351	-6.92252	16.7322
					2.51952	-6.99805	16.7668
					2.52553	-7.07358	16.8013
					2.53153	-7.14912	16.8359
					2.53754	-7.22465	16.8704
					2.54354	-7.30018	16.905
					2.54955	-7.37572	16.9396
					2.55556	-7.45125	16.9741
					2.56156	-7.52679	17.0087
					2.56757	-7.60232	17.0434
					2.57357	-7.67785	17.078
					2.57958	-7.75339	17.1126
					2.58559	-7.82892	17.1473
					2.59159	-7.90446	17.1819
					2.5976	-7.97999	17.2166
					2.6036	-8.05552	17.2512
					2.60961	-8.13106	17.2859
					2.61562	-8.20659	17.3206
					2.62162	-8.28212	17.3553
					2.62763	-8.35766	17.39
					2.63363	-8.43319	17.4248
					2.63964	-8.50873	17.4595
					2.64565	-8.58426	17.4943
					2.65165	-8.65979	17.529
					2.65766	-8.73533	17.5638
					2.66366	-8.81086	17.5985
					2.66967	-8.8864	17.6333
					2.67568	-8.96193	17.6681
					2.68168	-9.03746	17.7029
					2.68769	-9.113	17.7377
					2.69369	-9.18853	17.7726
					2.6997	-9.26407	17.8074
					2.70571	-9.3396	17.8422
					2.71171	-9.41513	17.8771
					2.71772	-9.49067	17.9119
					2.72372	-9.5662	17.9468
					2.72973	-9.64173	17.9817
					2.73574	-9.71727	18.0166
					2.74174	-9.7928	18.0515
					2.74775	-9.86834	18.0864
					2.75375	-9.94387	18.1213
					2.75976	-10.0194	18.1562
					2.76577	-10.0949	18.1911
					2.77177	-10.1705	18.2261
					2.77778	-10.246	18.261
					2.78378	-10.3215	18.296
					2.78979	-10.3971	18.331
					2.7958	-10.4726	18.3659
					2.8018	-10.5481	18.4009
					2.80781	-10.6237	18.4359
					2.81381	-10.6992	18.4709
					2.81982	-10.7747	18.5059
					2.82583	-10.8503	18.5409
					2.83183	-10.9258	18.576
					2.83784	-11.0013	18.611
					2.84384	-11.0769	18.646
					2.84985	-11.1524	18.6811
					2.85586	-11.2279	18.7161
					2.86186	-11.3035	18.7512
					2.86787	-11.379	18.7863
					2.87387	-11.4545	18.8214
					2.87988	-11.5301	18.8565
					2.88589	-11.6056	18.8915
					2.89189	-11.6811	18.9267
					2.8979	-11.7567	18.9618
					2.9039	-11.8322	18.9969
					2.90991	-11.9078	19.032
					2.91592	-11.9833	19.0672
					2.92192	-12.0588	19.1023
					2.92793	-12.1344	19.1375
					2.93393	-12.2099	19.1726
					2.93994	-12.2854	19.2078
					2.94595	-12.361	19.243
					2.95195	-12.4365	19.2781
					2.95796	-12.512	19.3133
					2.96396	-12.5876	19.3485
					2.96997	-12.6631	19.3837
					2.97598	-12.7386	19.4189
					2.98198	-12.8142	19.4542
					2.98799	-12.8897	19.4894
					2.99399	-12.9652	19.5246
					3	-13.0408	19.5598

## Sheet: Fig.S4d
scatter point	social engagement score	distractor bias (ms)		fitted curve	social engagement score	distractor bias (ms)	errorbar
	-2	80.925			-3	85.5526	6.67477
	-2	63.675			-2.99399	85.4543	6.66587
	-2	84.6585			-2.98799	85.356	6.65697
	-2	68.575			-2.98198	85.2576	6.64808
	-2	90.5179			-2.97598	85.1593	6.63919
	-2	92.9167			-2.96997	85.061	6.63031
	-2	110.061			-2.96396	84.9627	6.62143
	-2	111.81			-2.95796	84.8644	6.61256
	-2	104.833			-2.95195	84.7661	6.6037
	-2	68.0286			-2.94595	84.6677	6.59484
	-2	105.567			-2.93994	84.5694	6.58599
	-2	91.1944			-2.93393	84.4711	6.57714
	-2	111.705			-2.92793	84.3728	6.56831
	-2	77.6136			-2.92192	84.2745	6.55947
	-2	90.8781			-2.91592	84.1762	6.55065
	-2	121.406			-2.90991	84.0778	6.54183
	-2	105.236			-2.9039	83.9795	6.53301
	-2	95.5366			-2.8979	83.8812	6.52421
	-2	103.968			-2.89189	83.7829	6.51541
	-2	128.256			-2.88589	83.6846	6.50661
	-2	97.65			-2.87988	83.5863	6.49782
	-2	104.8			-2.87387	83.4879	6.48904
	-2	95.2			-2.86787	83.3896	6.48027
	-2	85.4865			-2.86186	83.2913	6.4715
	-2	44.0526			-2.85586	83.193	6.46274
	-2	24.2174			-2.84985	83.0947	6.45398
	-2	55.6047			-2.84384	82.9964	6.44523
	-2	53.0256			-2.83784	82.8981	6.43649
	-2	96.34			-2.83183	82.7997	6.42775
	-2	111.933			-2.82583	82.7014	6.41903
	-2	88.4706			-2.81982	82.6031	6.4103
	-2	104.538			-2.81381	82.5048	6.40159
	-2	108.125			-2.80781	82.4065	6.39288
	-2	53.0667			-2.8018	82.3082	6.38418
	-2	78.0952			-2.7958	82.2099	6.37548
	-2	74.4706			-2.78979	82.1115	6.36679
	-2	35.037			-2.78378	82.0132	6.35811
	-2	44.0351			-2.77778	81.9149	6.34944
	-2	48.0702			-2.77177	81.8166	6.34077
	-2	72.0303			-2.76577	81.7183	6.33211
	-2	50.1231			-2.75976	81.62	6.32345
	-2	53.1892			-2.75375	81.5216	6.31481
	-2	70.4167			-2.74775	81.4233	6.30617
	-2	68.3261			-2.74174	81.325	6.29753
	-2	53.8824			-2.73574	81.2267	6.28891
	-2	60.8841			-2.72973	81.1284	6.28029
	-2	47.3333			-2.72372	81.0301	6.27168
	-2	28.8049			-2.71772	80.9317	6.26307
	-2	56.9216			-2.71171	80.8334	6.25447
	-2	56.3036			-2.70571	80.7351	6.24588
	-2	47.4727			-2.6997	80.6368	6.2373
	-2	70.8667			-2.69369	80.5385	6.22873
	-2	68.7069			-2.68769	80.4402	6.22016
	-2	44.3288			-2.68168	80.3418	6.2116
	-2	42.9048			-2.67568	80.2435	6.20304
	-2	43.96			-2.66967	80.1452	6.1945
	-2	53.1343			-2.66366	80.0469	6.18596
	-2	54.3235			-2.65766	79.9486	6.17743
	-2	34.4091			-2.65165	79.8503	6.1689
	-2	45.4359			-2.64565	79.7519	6.16039
	-2	41.8909			-2.63964	79.6536	6.15188
	-2	57.7627			-2.63363	79.5553	6.14338
	-2	45.3396			-2.62763	79.457	6.13489
	-2	28.8438			-2.62162	79.3587	6.1264
	-2	43.1884			-2.61562	79.2604	6.11792
	-2	72.5135			-2.60961	79.1621	6.10945
	-2	51.1481			-2.6036	79.0637	6.10099
	-2	64.1633			-2.5976	78.9654	6.09253
	-2	40.0735			-2.59159	78.8671	6.08409
	-2	49.1714			-2.58559	78.7688	6.07565
	-2	26.9565			-2.57958	78.6705	6.06722
	-2	30.413			-2.57357	78.5722	6.05879
	1	49.7955			-2.56757	78.4738	6.05038
	1	59.9811			-2.56156	78.3755	6.04197
	1	15.8852			-2.55556	78.2772	6.03357
	1	19.2308			-2.54955	78.1789	6.02518
	1	26.6508			-2.54354	78.0806	6.0168
	1	36.6441			-2.53754	77.9823	6.00842
	1	33.6364			-2.53153	77.8839	6.00006
	1	8.2439			-2.52553	77.7856	5.9917
	1	51.38			-2.51952	77.6873	5.98335
	1	48.7812			-2.51351	77.589	5.975
	1	45.6458			-2.50751	77.4907	5.96667
	1	28.4412			-2.5015	77.3924	5.95834
	1	47.5122			-2.4955	77.294	5.95003
	1	49.7143			-2.48949	77.1957	5.94172
	1	15.1091			-2.48348	77.0974	5.93342
	1	8.51064			-2.47748	76.9991	5.92513
	1	14.1579			-2.47147	76.9008	5.91684
	1	24.5769			-2.46547	76.8025	5.90857
	1	4.6			-2.45946	76.7042	5.9003
	1	42.1395			-2.45345	76.6058	5.89204
	1	39.1731			-2.44745	76.5075	5.88379
	1	9.625			-2.44144	76.4092	5.87555
	1	12.7755			-2.43544	76.3109	5.86732
	1	6.1875			-2.42943	76.2126	5.8591
	1	-17			-2.42342	76.1143	5.85088
	1	11.4815			-2.41742	76.0159	5.84268
	1	7.0339			-2.41141	75.9176	5.83448
	1	-7.45652			-2.40541	75.8193	5.8263
	1	8.03571			-2.3994	75.721	5.81812
	1	-3			-2.39339	75.6227	5.80995
	1	8.75			-2.38739	75.5244	5.80179
	1	-16.2			-2.38138	75.4261	5.79363
	1	12.0833			-2.37538	75.3277	5.78549
	1	5.4			-2.36937	75.2294	5.77736
	1	-10.6304			-2.36336	75.1311	5.76923
	1	16.7097			-2.35736	75.0328	5.76112
	3	-29.5476			-2.35135	74.9345	5.75301
	3	-19.5517			-2.34535	74.8362	5.74492
	3	-5.83333			-2.33934	74.7378	5.73683
	3	-12.3721			-2.33333	74.6395	5.72875
	3	-14.6557			-2.32733	74.5412	5.72068
	3	2.71429			-2.32132	74.4429	5.71262
	3	-5.98			-2.31532	74.3446	5.70457
	3	-15.383			-2.30931	74.2463	5.69653
	3	6.45098			-2.3033	74.1479	5.6885
	3	-8.8125			-2.2973	74.0496	5.68048
	3	16.5345			-2.29129	73.9513	5.67247
	3	0.823529			-2.28529	73.853	5.66447
	3	-51.125			-2.27928	73.7547	5.65648
	3	-53.8868			-2.27327	73.6564	5.6485
	3	-39.7907			-2.26727	73.558	5.64053
	3	-29.5849			-2.26126	73.4597	5.63256
	3	-17.3393			-2.25526	73.3614	5.62461
	3	-13.7077			-2.24925	73.2631	5.61667
	3	-0.829787			-2.24324	73.1648	5.60874
	3	-12.0926			-2.23724	73.0665	5.60081
	3	6.94444			-2.23123	72.9682	5.5929
	3	-3			-2.22523	72.8698	5.585
	3	18.5246			-2.21922	72.7715	5.57711
	3	16.0851			-2.21321	72.6732	5.56922
	3	-51.1304			-2.20721	72.5749	5.56135
	3	-31.0484			-2.2012	72.4766	5.55349
	3	-20.9512			-2.1952	72.3783	5.54564
	3	-14.4694			-2.18919	72.2799	5.5378
	3	-1.73913			-2.18318	72.1816	5.52997
	3	-11.1			-2.17718	72.0833	5.52215
	3	4.64815			-2.17117	71.985	5.51434
	3	-24.2807			-2.16517	71.8867	5.50654
	3	-20.14			-2.15916	71.7884	5.49875
	3	-27.1143			-2.15315	71.69	5.49097
	3	4.11667			-2.14715	71.5917	5.48321
	3	8.125			-2.14114	71.4934	5.47545
					-2.13514	71.3951	5.46771
					-2.12913	71.2968	5.45997
					-2.12312	71.1985	5.45225
					-2.11712	71.1001	5.44453
					-2.11111	71.0018	5.43683
					-2.10511	70.9035	5.42914
					-2.0991	70.8052	5.42146
					-2.09309	70.7069	5.41379
					-2.08709	70.6086	5.40613
					-2.08108	70.5103	5.39849
					-2.07508	70.4119	5.39085
					-2.06907	70.3136	5.38323
					-2.06306	70.2153	5.37562
					-2.05706	70.117	5.36802
					-2.05105	70.0187	5.36043
					-2.04505	69.9204	5.35285
					-2.03904	69.822	5.34528
					-2.03303	69.7237	5.33772
					-2.02703	69.6254	5.33018
					-2.02102	69.5271	5.32265
					-2.01502	69.4288	5.31513
					-2.00901	69.3305	5.30762
					-2.003	69.2322	5.30012
					-1.997	69.1338	5.29264
					-1.99099	69.0355	5.28517
					-1.98498	68.9372	5.27771
					-1.97898	68.8389	5.27026
					-1.97297	68.7406	5.26282
					-1.96697	68.6423	5.2554
					-1.96096	68.5439	5.24798
					-1.95495	68.4456	5.24058
					-1.94895	68.3473	5.2332
					-1.94294	68.249	5.22582
					-1.93694	68.1507	5.21846
					-1.93093	68.0524	5.21111
					-1.92492	67.954	5.20377
					-1.91892	67.8557	5.19644
					-1.91291	67.7574	5.18913
					-1.90691	67.6591	5.18183
					-1.9009	67.5608	5.17454
					-1.89489	67.4625	5.16727
					-1.88889	67.3641	5.16
					-1.88288	67.2658	5.15275
					-1.87688	67.1675	5.14552
					-1.87087	67.0692	5.13829
					-1.86486	66.9709	5.13108
					-1.85886	66.8726	5.12389
					-1.85285	66.7743	5.1167
					-1.84685	66.6759	5.10953
					-1.84084	66.5776	5.10237
					-1.83483	66.4793	5.09523
					-1.82883	66.381	5.0881
					-1.82282	66.2827	5.08098
					-1.81682	66.1844	5.07388
					-1.81081	66.086	5.06679
					-1.8048	65.9877	5.05971
					-1.7988	65.8894	5.05265
					-1.79279	65.7911	5.0456
					-1.78679	65.6928	5.03856
					-1.78078	65.5945	5.03154
					-1.77477	65.4962	5.02453
					-1.76877	65.3978	5.01754
					-1.76276	65.2995	5.01056
					-1.75676	65.2012	5.00359
					-1.75075	65.1029	4.99664
					-1.74474	65.0046	4.9897
					-1.73874	64.9063	4.98278
					-1.73273	64.8079	4.97587
					-1.72673	64.7096	4.96897
					-1.72072	64.6113	4.96209
					-1.71471	64.513	4.95523
					-1.70871	64.4147	4.94837
					-1.7027	64.3164	4.94154
					-1.6967	64.218	4.93471
					-1.69069	64.1197	4.92791
					-1.68468	64.0214	4.92111
					-1.67868	63.9231	4.91434
					-1.67267	63.8248	4.90757
					-1.66667	63.7265	4.90082
					-1.66066	63.6281	4.89409
					-1.65465	63.5298	4.88737
					-1.64865	63.4315	4.88067
					-1.64264	63.3332	4.87398
					-1.63664	63.2349	4.86731
					-1.63063	63.1366	4.86065
					-1.62462	63.0383	4.85401
					-1.61862	62.9399	4.84738
					-1.61261	62.8416	4.84077
					-1.60661	62.7433	4.83418
					-1.6006	62.645	4.8276
					-1.59459	62.5467	4.82104
					-1.58859	62.4484	4.81449
					-1.58258	62.35	4.80795
					-1.57658	62.2517	4.80144
					-1.57057	62.1534	4.79494
					-1.56456	62.0551	4.78845
					-1.55856	61.9568	4.78199
					-1.55255	61.8585	4.77553
					-1.54655	61.7601	4.7691
					-1.54054	61.6618	4.76268
					-1.53453	61.5635	4.75627
					-1.52853	61.4652	4.74989
					-1.52252	61.3669	4.74352
					-1.51652	61.2686	4.73717
					-1.51051	61.1703	4.73083
					-1.5045	61.0719	4.72451
					-1.4985	60.9736	4.7182
					-1.49249	60.8753	4.71192
					-1.48649	60.777	4.70565
					-1.48048	60.6787	4.69939
					-1.47447	60.5804	4.69316
					-1.46847	60.482	4.68694
					-1.46246	60.3837	4.68074
					-1.45646	60.2854	4.67455
					-1.45045	60.1871	4.66839
					-1.44444	60.0888	4.66224
					-1.43844	59.9905	4.65611
					-1.43243	59.8921	4.64999
					-1.42643	59.7938	4.64389
					-1.42042	59.6955	4.63781
					-1.41441	59.5972	4.63175
					-1.40841	59.4989	4.62571
					-1.4024	59.4006	4.61968
					-1.3964	59.3023	4.61367
					-1.39039	59.2039	4.60768
					-1.38438	59.1056	4.60171
					-1.37838	59.0073	4.59576
					-1.37237	58.909	4.58982
					-1.36637	58.8107	4.58391
					-1.36036	58.7124	4.57801
					-1.35435	58.614	4.57213
					-1.34835	58.5157	4.56626
					-1.34234	58.4174	4.56042
					-1.33634	58.3191	4.5546
					-1.33033	58.2208	4.54879
					-1.32432	58.1225	4.543
					-1.31832	58.0241	4.53723
					-1.31231	57.9258	4.53148
					-1.30631	57.8275	4.52575
					-1.3003	57.7292	4.52004
					-1.29429	57.6309	4.51435
					-1.28829	57.5326	4.50868
					-1.28228	57.4342	4.50302
					-1.27628	57.3359	4.49739
					-1.27027	57.2376	4.49177
					-1.26426	57.1393	4.48618
					-1.25826	57.041	4.4806
					-1.25225	56.9427	4.47504
					-1.24625	56.8444	4.46951
					-1.24024	56.746	4.46399
					-1.23423	56.6477	4.45849
					-1.22823	56.5494	4.45302
					-1.22222	56.4511	4.44756
					-1.21622	56.3528	4.44212
					-1.21021	56.2545	4.43671
					-1.2042	56.1561	4.43131
					-1.1982	56.0578	4.42593
					-1.19219	55.9595	4.42058
					-1.18619	55.8612	4.41524
					-1.18018	55.7629	4.40993
					-1.17417	55.6646	4.40463
					-1.16817	55.5662	4.39936
					-1.16216	55.4679	4.39411
					-1.15616	55.3696	4.38888
					-1.15015	55.2713	4.38366
					-1.14414	55.173	4.37847
					-1.13814	55.0747	4.37331
					-1.13213	54.9763	4.36816
					-1.12613	54.878	4.36303
					-1.12012	54.7797	4.35793
					-1.11411	54.6814	4.35284
					-1.10811	54.5831	4.34778
					-1.1021	54.4848	4.34274
					-1.0961	54.3865	4.33772
					-1.09009	54.2881	4.33272
					-1.08408	54.1898	4.32775
					-1.07808	54.0915	4.32279
					-1.07207	53.9932	4.31786
					-1.06607	53.8949	4.31295
					-1.06006	53.7966	4.30806
					-1.05405	53.6982	4.30319
					-1.04805	53.5999	4.29835
					-1.04204	53.5016	4.29353
					-1.03604	53.4033	4.28873
					-1.03003	53.305	4.28395
					-1.02402	53.2067	4.2792
					-1.01802	53.1084	4.27447
					-1.01201	53.01	4.26976
					-1.00601	52.9117	4.26507
					-1	52.8134	4.26041
					-0.993994	52.7151	4.25577
					-0.987988	52.6168	4.25115
					-0.981982	52.5185	4.24655
					-0.975976	52.4201	4.24198
					-0.96997	52.3218	4.23743
					-0.963964	52.2235	4.23291
					-0.957958	52.1252	4.2284
					-0.951952	52.0269	4.22393
					-0.945946	51.9286	4.21947
					-0.93994	51.8302	4.21504
					-0.933934	51.7319	4.21063
					-0.927928	51.6336	4.20625
					-0.921922	51.5353	4.20188
					-0.915916	51.437	4.19755
					-0.90991	51.3387	4.19324
					-0.903904	51.2403	4.18895
					-0.897898	51.142	4.18468
					-0.891892	51.0437	4.18044
					-0.885886	50.9454	4.17622
					-0.87988	50.8471	4.17203
					-0.873874	50.7488	4.16786
					-0.867868	50.6504	4.16372
					-0.861862	50.5521	4.1596
					-0.855856	50.4538	4.15551
					-0.84985	50.3555	4.15144
					-0.843844	50.2572	4.14739
					-0.837838	50.1589	4.14337
					-0.831832	50.0606	4.13937
					-0.825826	49.9622	4.1354
					-0.81982	49.8639	4.13146
					-0.813814	49.7656	4.12754
					-0.807808	49.6673	4.12364
					-0.801802	49.569	4.11977
					-0.795796	49.4707	4.11593
					-0.78979	49.3723	4.11211
					-0.783784	49.274	4.10831
					-0.777778	49.1757	4.10454
					-0.771772	49.0774	4.1008
					-0.765766	48.9791	4.09708
					-0.75976	48.8808	4.09339
					-0.753754	48.7824	4.08973
					-0.747748	48.6841	4.08609
					-0.741742	48.5858	4.08247
					-0.735736	48.4875	4.07888
					-0.72973	48.3892	4.07532
					-0.723724	48.2909	4.07179
					-0.717718	48.1926	4.06828
					-0.711712	48.0942	4.06479
					-0.705706	47.9959	4.06133
					-0.6997	47.8976	4.0579
					-0.693694	47.7993	4.0545
					-0.687688	47.701	4.05112
					-0.681682	47.6027	4.04777
					-0.675676	47.5043	4.04444
					-0.66967	47.406	4.04115
					-0.663664	47.3077	4.03788
					-0.657658	47.2094	4.03463
					-0.651652	47.1111	4.03141
					-0.645646	47.0128	4.02822
					-0.63964	46.9144	4.02506
					-0.633634	46.8161	4.02192
					-0.627628	46.7178	4.01882
					-0.621622	46.6195	4.01573
					-0.615616	46.5212	4.01268
					-0.60961	46.4229	4.00965
					-0.603604	46.3246	4.00665
					-0.597598	46.2262	4.00368
					-0.591592	46.1279	4.00073
					-0.585586	46.0296	3.99782
					-0.57958	45.9313	3.99493
					-0.573574	45.833	3.99207
					-0.567568	45.7347	3.98923
					-0.561562	45.6363	3.98643
					-0.555556	45.538	3.98365
					-0.54955	45.4397	3.9809
					-0.543543	45.3414	3.97818
					-0.537538	45.2431	3.97548
					-0.531532	45.1448	3.97282
					-0.525525	45.0464	3.97018
					-0.51952	44.9481	3.96757
					-0.513513	44.8498	3.96499
					-0.507508	44.7515	3.96243
					-0.501502	44.6532	3.95991
					-0.495495	44.5549	3.95741
					-0.48949	44.4566	3.95495
					-0.483484	44.3582	3.95251
					-0.477477	44.2599	3.9501
					-0.471471	44.1616	3.94772
					-0.465465	44.0633	3.94536
					-0.459459	43.965	3.94304
					-0.453453	43.8667	3.94074
					-0.447447	43.7683	3.93848
					-0.441441	43.67	3.93624
					-0.435435	43.5717	3.93403
					-0.429429	43.4734	3.93185
					-0.423423	43.3751	3.9297
					-0.417417	43.2768	3.92758
					-0.411411	43.1784	3.92549
					-0.405405	43.0801	3.92343
					-0.399399	42.9818	3.92139
					-0.393393	42.8835	3.91939
					-0.387387	42.7852	3.91741
					-0.381381	42.6869	3.91547
					-0.375375	42.5885	3.91355
					-0.369369	42.4902	3.91167
					-0.363363	42.3919	3.90981
					-0.357357	42.2936	3.90798
					-0.351351	42.1953	3.90618
					-0.345345	42.097	3.90442
					-0.339339	41.9987	3.90268
					-0.333333	41.9003	3.90097
					-0.327327	41.802	3.89929
					-0.321321	41.7037	3.89764
					-0.315315	41.6054	3.89602
					-0.309309	41.5071	3.89443
					-0.303303	41.4088	3.89287
					-0.297297	41.3104	3.89134
					-0.291291	41.2121	3.88985
					-0.285285	41.1138	3.88838
					-0.279279	41.0155	3.88694
					-0.273273	40.9172	3.88553
					-0.267267	40.8189	3.88415
					-0.261261	40.7205	3.8828
					-0.255255	40.6222	3.88148
					-0.249249	40.5239	3.88019
					-0.243243	40.4256	3.87893
					-0.237237	40.3273	3.87771
					-0.231231	40.229	3.87651
					-0.225225	40.1307	3.87534
					-0.219219	40.0323	3.87421
					-0.213213	39.934	3.8731
					-0.207207	39.8357	3.87202
					-0.201201	39.7374	3.87098
					-0.195195	39.6391	3.86996
					-0.189189	39.5408	3.86898
					-0.183183	39.4424	3.86802
					-0.177177	39.3441	3.8671
					-0.171171	39.2458	3.86621
					-0.165165	39.1475	3.86535
					-0.159159	39.0492	3.86451
					-0.153153	38.9509	3.86371
					-0.147147	38.8525	3.86294
					-0.141141	38.7542	3.8622
					-0.135135	38.6559	3.86149
					-0.129129	38.5576	3.86082
					-0.123123	38.4593	3.86017
					-0.117117	38.361	3.85955
					-0.111111	38.2627	3.85897
					-0.105105	38.1643	3.85841
					-0.0990991	38.066	3.85789
					-0.0930931	37.9677	3.85739
					-0.0870871	37.8694	3.85693
					-0.0810811	37.7711	3.8565
					-0.0750751	37.6728	3.8561
					-0.0690691	37.5744	3.85573
					-0.0630631	37.4761	3.85539
					-0.0570571	37.3778	3.85508
					-0.0510511	37.2795	3.8548
					-0.045045	37.1812	3.85455
					-0.039039	37.0829	3.85434
					-0.033033	36.9845	3.85415
					-0.027027	36.8862	3.854
					-0.021021	36.7879	3.85387
					-0.015015	36.6896	3.85378
					-0.00900901	36.5913	3.85372
					-0.003003	36.493	3.85369
					0.003003	36.3946	3.85369
					0.00900901	36.2963	3.85372
					0.015015	36.198	3.85378
					0.021021	36.0997	3.85387
					0.027027	36.0014	3.854
					0.033033	35.9031	3.85415
					0.039039	35.8048	3.85434
					0.045045	35.7064	3.85455
					0.0510511	35.6081	3.8548
					0.0570571	35.5098	3.85508
					0.0630631	35.4115	3.85539
					0.0690691	35.3132	3.85573
					0.0750751	35.2149	3.8561
					0.0810811	35.1165	3.8565
					0.0870871	35.0182	3.85693
					0.0930931	34.9199	3.85739
					0.0990991	34.8216	3.85789
					0.105105	34.7233	3.85841
					0.111111	34.625	3.85897
					0.117117	34.5266	3.85955
					0.123123	34.4283	3.86017
					0.129129	34.33	3.86082
					0.135135	34.2317	3.86149
					0.141141	34.1334	3.8622
					0.147147	34.0351	3.86294
					0.153153	33.9368	3.86371
					0.159159	33.8384	3.86451
					0.165165	33.7401	3.86535
					0.171171	33.6418	3.86621
					0.177177	33.5435	3.8671
					0.183183	33.4452	3.86802
					0.189189	33.3469	3.86898
					0.195195	33.2485	3.86996
					0.201201	33.1502	3.87098
					0.207207	33.0519	3.87202
					0.213213	32.9536	3.8731
					0.219219	32.8553	3.87421
					0.225225	32.757	3.87534
					0.231231	32.6586	3.87651
					0.237237	32.5603	3.87771
					0.243243	32.462	3.87893
					0.249249	32.3637	3.88019
					0.255255	32.2654	3.88148
					0.261261	32.1671	3.8828
					0.267267	32.0688	3.88415
					0.273273	31.9704	3.88553
					0.279279	31.8721	3.88694
					0.285285	31.7738	3.88838
					0.291291	31.6755	3.88985
					0.297297	31.5772	3.89134
					0.303303	31.4789	3.89287
					0.309309	31.3805	3.89443
					0.315315	31.2822	3.89602
					0.321321	31.1839	3.89764
					0.327327	31.0856	3.89929
					0.333333	30.9873	3.90097
					0.339339	30.889	3.90268
					0.345345	30.7906	3.90442
					0.351351	30.6923	3.90618
					0.357357	30.594	3.90798
					0.363363	30.4957	3.90981
					0.369369	30.3974	3.91167
					0.375375	30.2991	3.91355
					0.381381	30.2007	3.91547
					0.387387	30.1024	3.91741
					0.393393	30.0041	3.91939
					0.399399	29.9058	3.92139
					0.405405	29.8075	3.92343
					0.411411	29.7092	3.92549
					0.417417	29.6109	3.92758
					0.423423	29.5125	3.9297
					0.429429	29.4142	3.93185
					0.435435	29.3159	3.93403
					0.441441	29.2176	3.93624
					0.447447	29.1193	3.93848
					0.453453	29.021	3.94074
					0.459459	28.9226	3.94304
					0.465465	28.8243	3.94536
					0.471471	28.726	3.94772
					0.477477	28.6277	3.9501
					0.483484	28.5294	3.95251
					0.48949	28.4311	3.95495
					0.495495	28.3327	3.95741
					0.501502	28.2344	3.95991
					0.507508	28.1361	3.96243
					0.513513	28.0378	3.96499
					0.51952	27.9395	3.96757
					0.525525	27.8412	3.97018
					0.531532	27.7429	3.97282
					0.537538	27.6445	3.97548
					0.543543	27.5462	3.97818
					0.54955	27.4479	3.9809
					0.555556	27.3496	3.98365
					0.561562	27.2513	3.98643
					0.567568	27.153	3.98923
					0.573574	27.0546	3.99207
					0.57958	26.9563	3.99493
					0.585586	26.858	3.99782
					0.591592	26.7597	4.00073
					0.597598	26.6614	4.00368
					0.603604	26.5631	4.00665
					0.60961	26.4647	4.00965
					0.615616	26.3664	4.01268
					0.621622	26.2681	4.01573
					0.627628	26.1698	4.01882
					0.633634	26.0715	4.02192
					0.63964	25.9732	4.02506
					0.645646	25.8748	4.02822
					0.651652	25.7765	4.03141
					0.657658	25.6782	4.03463
					0.663664	25.5799	4.03788
					0.66967	25.4816	4.04115
					0.675676	25.3833	4.04444
					0.681682	25.285	4.04777
					0.687688	25.1866	4.05112
					0.693694	25.0883	4.0545
					0.6997	24.99	4.0579
					0.705706	24.8917	4.06133
					0.711712	24.7934	4.06479
					0.717718	24.6951	4.06828
					0.723724	24.5967	4.07179
					0.72973	24.4984	4.07532
					0.735736	24.4001	4.07888
					0.741742	24.3018	4.08247
					0.747748	24.2035	4.08609
					0.753754	24.1052	4.08973
					0.75976	24.0068	4.09339
					0.765766	23.9085	4.09708
					0.771772	23.8102	4.1008
					0.777778	23.7119	4.10454
					0.783784	23.6136	4.10831
					0.78979	23.5153	4.11211
					0.795796	23.417	4.11593
					0.801802	23.3186	4.11977
					0.807808	23.2203	4.12364
					0.813814	23.122	4.12754
					0.81982	23.0237	4.13146
					0.825826	22.9254	4.1354
					0.831832	22.8271	4.13937
					0.837838	22.7287	4.14337
					0.843844	22.6304	4.14739
					0.84985	22.5321	4.15144
					0.855856	22.4338	4.15551
					0.861862	22.3355	4.1596
					0.867868	22.2372	4.16372
					0.873874	22.1388	4.16786
					0.87988	22.0405	4.17203
					0.885886	21.9422	4.17622
					0.891892	21.8439	4.18044
					0.897898	21.7456	4.18468
					0.903904	21.6473	4.18895
					0.90991	21.549	4.19324
					0.915916	21.4506	4.19755
					0.921922	21.3523	4.20188
					0.927928	21.254	4.20625
					0.933934	21.1557	4.21063
					0.93994	21.0574	4.21504
					0.945946	20.9591	4.21947
					0.951952	20.8607	4.22393
					0.957958	20.7624	4.2284
					0.963964	20.6641	4.23291
					0.96997	20.5658	4.23743
					0.975976	20.4675	4.24198
					0.981982	20.3692	4.24655
					0.987988	20.2708	4.25115
					0.993994	20.1725	4.25577
					1	20.0742	4.26041
					1.00601	19.9759	4.26507
					1.01201	19.8776	4.26976
					1.01802	19.7793	4.27447
					1.02402	19.6809	4.2792
					1.03003	19.5826	4.28395
					1.03604	19.4843	4.28873
					1.04204	19.386	4.29353
					1.04805	19.2877	4.29835
					1.05405	19.1894	4.30319
					1.06006	19.0911	4.30806
					1.06607	18.9927	4.31295
					1.07207	18.8944	4.31786
					1.07808	18.7961	4.32279
					1.08408	18.6978	4.32775
					1.09009	18.5995	4.33272
					1.0961	18.5012	4.33772
					1.1021	18.4028	4.34274
					1.10811	18.3045	4.34778
					1.11411	18.2062	4.35284
					1.12012	18.1079	4.35793
					1.12613	18.0096	4.36303
					1.13213	17.9113	4.36816
					1.13814	17.8129	4.37331
					1.14414	17.7146	4.37847
					1.15015	17.6163	4.38366
					1.15616	17.518	4.38888
					1.16216	17.4197	4.39411
					1.16817	17.3214	4.39936
					1.17417	17.2231	4.40463
					1.18018	17.1247	4.40993
					1.18619	17.0264	4.41524
					1.19219	16.9281	4.42058
					1.1982	16.8298	4.42593
					1.2042	16.7315	4.43131
					1.21021	16.6332	4.43671
					1.21622	16.5348	4.44212
					1.22222	16.4365	4.44756
					1.22823	16.3382	4.45302
					1.23423	16.2399	4.45849
					1.24024	16.1416	4.46399
					1.24625	16.0433	4.46951
					1.25225	15.9449	4.47504
					1.25826	15.8466	4.4806
					1.26426	15.7483	4.48618
					1.27027	15.65	4.49177
					1.27628	15.5517	4.49739
					1.28228	15.4534	4.50302
					1.28829	15.3551	4.50868
					1.29429	15.2567	4.51435
					1.3003	15.1584	4.52004
					1.30631	15.0601	4.52575
					1.31231	14.9618	4.53148
					1.31832	14.8635	4.53723
					1.32432	14.7652	4.543
					1.33033	14.6668	4.54879
					1.33634	14.5685	4.5546
					1.34234	14.4702	4.56042
					1.34835	14.3719	4.56626
					1.35435	14.2736	4.57213
					1.36036	14.1753	4.57801
					1.36637	14.0769	4.58391
					1.37237	13.9786	4.58982
					1.37838	13.8803	4.59576
					1.38438	13.782	4.60171
					1.39039	13.6837	4.60768
					1.3964	13.5854	4.61367
					1.4024	13.487	4.61968
					1.40841	13.3887	4.62571
					1.41441	13.2904	4.63175
					1.42042	13.1921	4.63781
					1.42643	13.0938	4.64389
					1.43243	12.9955	4.64999
					1.43844	12.8972	4.65611
					1.44444	12.7988	4.66224
					1.45045	12.7005	4.66839
					1.45646	12.6022	4.67455
					1.46246	12.5039	4.68074
					1.46847	12.4056	4.68694
					1.47447	12.3073	4.69316
					1.48048	12.2089	4.69939
					1.48649	12.1106	4.70565
					1.49249	12.0123	4.71192
					1.4985	11.914	4.7182
					1.5045	11.8157	4.72451
					1.51051	11.7174	4.73083
					1.51652	11.619	4.73717
					1.52252	11.5207	4.74352
					1.52853	11.4224	4.74989
					1.53453	11.3241	4.75627
					1.54054	11.2258	4.76268
					1.54655	11.1275	4.7691
					1.55255	11.0292	4.77553
					1.55856	10.9308	4.78199
					1.56456	10.8325	4.78845
					1.57057	10.7342	4.79494
					1.57658	10.6359	4.80144
					1.58258	10.5376	4.80795
					1.58859	10.4393	4.81449
					1.59459	10.3409	4.82104
					1.6006	10.2426	4.8276
					1.60661	10.1443	4.83418
					1.61261	10.046	4.84077
					1.61862	9.94768	4.84738
					1.62462	9.84936	4.85401
					1.63063	9.75104	4.86065
					1.63664	9.65273	4.86731
					1.64264	9.55441	4.87398
					1.64865	9.4561	4.88067
					1.65465	9.35778	4.88737
					1.66066	9.25947	4.89409
					1.66667	9.16115	4.90082
					1.67267	9.06283	4.90757
					1.67868	8.96452	4.91434
					1.68468	8.8662	4.92111
					1.69069	8.76788	4.92791
					1.6967	8.66957	4.93471
					1.7027	8.57125	4.94154
					1.70871	8.47294	4.94837
					1.71471	8.37462	4.95523
					1.72072	8.27631	4.96209
					1.72673	8.17799	4.96897
					1.73273	8.07967	4.97587
					1.73874	7.98136	4.98278
					1.74474	7.88304	4.9897
					1.75075	7.78473	4.99664
					1.75676	7.68641	5.00359
					1.76276	7.5881	5.01056
					1.76877	7.48978	5.01754
					1.77477	7.39146	5.02453
					1.78078	7.29315	5.03154
					1.78679	7.19483	5.03856
					1.79279	7.09652	5.0456
					1.7988	6.9982	5.05265
					1.8048	6.89988	5.05971
					1.81081	6.80157	5.06679
					1.81682	6.70325	5.07388
					1.82282	6.60494	5.08098
					1.82883	6.50662	5.0881
					1.83483	6.4083	5.09523
					1.84084	6.30999	5.10237
					1.84685	6.21167	5.10953
					1.85285	6.11336	5.1167
					1.85886	6.01504	5.12389
					1.86486	5.91672	5.13108
					1.87087	5.81841	5.13829
					1.87688	5.72009	5.14552
					1.88288	5.62178	5.15275
					1.88889	5.52346	5.16
					1.89489	5.42515	5.16727
					1.9009	5.32683	5.17454
					1.90691	5.22851	5.18183
					1.91291	5.1302	5.18913
					1.91892	5.03188	5.19644
					1.92492	4.93357	5.20377
					1.93093	4.83525	5.21111
					1.93694	4.73693	5.21846
					1.94294	4.63862	5.22582
					1.94895	4.5403	5.2332
					1.95495	4.44199	5.24058
					1.96096	4.34367	5.24798
					1.96697	4.24535	5.2554
					1.97297	4.14704	5.26282
					1.97898	4.04872	5.27026
					1.98498	3.95041	5.27771
					1.99099	3.85209	5.28517
					1.997	3.75378	5.29264
					2.003	3.65546	5.30012
					2.00901	3.55714	5.30762
					2.01502	3.45883	5.31513
					2.02102	3.36051	5.32265
					2.02703	3.2622	5.33018
					2.03303	3.16388	5.33772
					2.03904	3.06556	5.34528
					2.04505	2.96725	5.35285
					2.05105	2.86893	5.36043
					2.05706	2.77062	5.36802
					2.06306	2.6723	5.37562
					2.06907	2.57398	5.38323
					2.07508	2.47567	5.39085
					2.08108	2.37735	5.39849
					2.08709	2.27904	5.40613
					2.09309	2.18072	5.41379
					2.0991	2.08241	5.42146
					2.10511	1.98409	5.42914
					2.11111	1.88577	5.43683
					2.11712	1.78746	5.44453
					2.12312	1.68914	5.45225
					2.12913	1.59083	5.45997
					2.13514	1.49251	5.46771
					2.14114	1.39419	5.47545
					2.14715	1.29588	5.48321
					2.15315	1.19756	5.49097
					2.15916	1.09925	5.49875
					2.16517	1.00093	5.50654
					2.17117	0.902615	5.51434
					2.17718	0.804299	5.52215
					2.18318	0.705983	5.52997
					2.18919	0.607667	5.5378
					2.1952	0.509351	5.54564
					2.2012	0.411036	5.55349
					2.20721	0.31272	5.56135
					2.21321	0.214404	5.56922
					2.21922	0.116088	5.57711
					2.22523	0.0177721	5.585
					2.23123	-0.0805438	5.5929
					2.23724	-0.17886	5.60081
					2.24324	-0.277176	5.60874
					2.24925	-0.375491	5.61667
					2.25526	-0.473807	5.62461
					2.26126	-0.572123	5.63256
					2.26727	-0.670439	5.64053
					2.27327	-0.768755	5.6485
					2.27928	-0.867071	5.65648
					2.28529	-0.965387	5.66447
					2.29129	-1.0637	5.67247
					2.2973	-1.16202	5.68048
					2.3033	-1.26033	5.6885
					2.30931	-1.35865	5.69653
					2.31532	-1.45697	5.70457
					2.32132	-1.55528	5.71262
					2.32733	-1.6536	5.72068
					2.33333	-1.75191	5.72875
					2.33934	-1.85023	5.73683
					2.34535	-1.94855	5.74492
					2.35135	-2.04686	5.75301
					2.35736	-2.14518	5.76112
					2.36336	-2.24349	5.76923
					2.36937	-2.34181	5.77736
					2.37538	-2.44013	5.78549
					2.38138	-2.53844	5.79363
					2.38739	-2.63676	5.80179
					2.39339	-2.73507	5.80995
					2.3994	-2.83339	5.81812
					2.40541	-2.9317	5.8263
					2.41141	-3.03002	5.83448
					2.41742	-3.12834	5.84268
					2.42342	-3.22665	5.85088
					2.42943	-3.32497	5.8591
					2.43544	-3.42328	5.86732
					2.44144	-3.5216	5.87555
					2.44745	-3.61992	5.88379
					2.45345	-3.71823	5.89204
					2.45946	-3.81655	5.9003
					2.46547	-3.91486	5.90857
					2.47147	-4.01318	5.91684
					2.47748	-4.11149	5.92513
					2.48348	-4.20981	5.93342
					2.48949	-4.30813	5.94172
					2.4955	-4.40644	5.95003
					2.5015	-4.50476	5.95834
					2.50751	-4.60307	5.96667
					2.51351	-4.70139	5.975
					2.51952	-4.79971	5.98335
					2.52553	-4.89802	5.9917
					2.53153	-4.99634	6.00006
					2.53754	-5.09465	6.00842
					2.54354	-5.19297	6.0168
					2.54955	-5.29129	6.02518
					2.55556	-5.3896	6.03357
					2.56156	-5.48792	6.04197
					2.56757	-5.58623	6.05038
					2.57357	-5.68455	6.05879
					2.57958	-5.78287	6.06722
					2.58559	-5.88118	6.07565
					2.59159	-5.9795	6.08409
					2.5976	-6.07781	6.09253
					2.6036	-6.17613	6.10099
					2.60961	-6.27444	6.10945
					2.61562	-6.37276	6.11792
					2.62162	-6.47108	6.1264
					2.62763	-6.56939	6.13489
					2.63363	-6.66771	6.14338
					2.63964	-6.76602	6.15188
					2.64565	-6.86434	6.16039
					2.65165	-6.96266	6.1689
					2.65766	-7.06097	6.17743
					2.66366	-7.15929	6.18596
					2.66967	-7.2576	6.1945
					2.67568	-7.35592	6.20304
					2.68168	-7.45423	6.2116
					2.68769	-7.55255	6.22016
					2.69369	-7.65087	6.22873
					2.6997	-7.74918	6.2373
					2.70571	-7.8475	6.24588
					2.71171	-7.94581	6.25447
					2.71772	-8.04413	6.26307
					2.72372	-8.14245	6.27168
					2.72973	-8.24076	6.28029
					2.73574	-8.33908	6.28891
					2.74174	-8.43739	6.29753
					2.74775	-8.53571	6.30617
					2.75375	-8.63403	6.31481
					2.75976	-8.73234	6.32345
					2.76577	-8.83066	6.33211
					2.77177	-8.92897	6.34077
					2.77778	-9.02729	6.34944
					2.78378	-9.12561	6.35811
					2.78979	-9.22392	6.36679
					2.7958	-9.32224	6.37548
					2.8018	-9.42055	6.38418
					2.80781	-9.51887	6.39288
					2.81381	-9.61718	6.40159
					2.81982	-9.7155	6.4103
					2.82583	-9.81382	6.41903
					2.83183	-9.91213	6.42775
					2.83784	-10.0104	6.43649
					2.84384	-10.1088	6.44523
					2.84985	-10.2071	6.45398
					2.85586	-10.3054	6.46274
					2.86186	-10.4037	6.4715
					2.86787	-10.502	6.48027
					2.87387	-10.6003	6.48904
					2.87988	-10.6987	6.49782
					2.88589	-10.797	6.50661
					2.89189	-10.8953	6.51541
					2.8979	-10.9936	6.52421
					2.9039	-11.0919	6.53301
					2.90991	-11.1902	6.54183
					2.91592	-11.2886	6.55065
					2.92192	-11.3869	6.55947
					2.92793	-11.4852	6.56831
					2.93393	-11.5835	6.57714
					2.93994	-11.6818	6.58599
					2.94595	-11.7801	6.59484
					2.95195	-11.8784	6.6037
					2.95796	-11.9768	6.61256
					2.96396	-12.0751	6.62143
					2.96997	-12.1734	6.63031
					2.97598	-12.2717	6.63919
					2.98198	-12.37	6.64808
					2.98799	-12.4683	6.65697
					2.99399	-12.5667	6.66587
					3	-12.665	6.67477

## Sheet: Fig.S4e
scatter point	social engagement score	distractor bias (ms)		fitted curve	social engagement score	distractor bias (ms)	errorbar
	-1	80.925			-3	85.8548	16.058
	-1	63.675			-2.99399	85.7559	16.0304
	-1	84.6585			-2.98799	85.657	16.0029
	-1	68.575			-2.98198	85.558	15.9754
	-1	90.5179			-2.97598	85.4591	15.9478
	-1	92.9167			-2.96997	85.3602	15.9203
	-1	110.061			-2.96396	85.2613	15.8928
	-1	111.81			-2.95796	85.1624	15.8653
	-1	104.833			-2.95195	85.0634	15.8378
	-1	68.0286			-2.94595	84.9645	15.8103
	-1	105.567			-2.93994	84.8656	15.7828
	-1	91.1944			-2.93393	84.7667	15.7554
	-1	111.705			-2.92793	84.6678	15.7279
	-1	77.6136			-2.92192	84.5688	15.7005
	-1	90.8781			-2.91592	84.4699	15.673
	-1	121.406			-2.90991	84.371	15.6456
	-1	105.236			-2.9039	84.2721	15.6181
	-1	95.5366			-2.8979	84.1732	15.5907
	-1	103.968			-2.89189	84.0742	15.5633
	-1	128.256			-2.88589	83.9753	15.5359
	-1	97.65			-2.87988	83.8764	15.5085
	-1	104.8			-2.87387	83.7775	15.4811
	-1	95.2			-2.86787	83.6786	15.4538
	-1	85.4865			-2.86186	83.5796	15.4264
	-1	44.0526			-2.85586	83.4807	15.399
	-1	24.2174			-2.84985	83.3818	15.3717
	-1	55.6047			-2.84384	83.2829	15.3443
	-1	53.0256			-2.83784	83.1839	15.317
	-1	96.34			-2.83183	83.085	15.2897
	-1	111.933			-2.82583	82.9861	15.2624
	-1	88.4706			-2.81982	82.8872	15.2351
	-1	104.538			-2.81381	82.7883	15.2078
	-1	108.125			-2.80781	82.6894	15.1805
	-1	53.0667			-2.8018	82.5904	15.1532
	-1	78.0952			-2.7958	82.4915	15.1259
	-1	74.4706			-2.78979	82.3926	15.0987
	-1	35.037			-2.78378	82.2937	15.0714
	-1	44.0351			-2.77778	82.1947	15.0442
	-1	48.0702			-2.77177	82.0958	15.017
	-1	72.0303			-2.76577	81.9969	14.9898
	-1	50.1231			-2.75976	81.898	14.9625
	-1	53.1892			-2.75375	81.7991	14.9353
	-1	70.4167			-2.74775	81.7001	14.9082
	-1	68.3261			-2.74174	81.6012	14.881
	-1	53.8824			-2.73574	81.5023	14.8538
	-1	60.8841			-2.72973	81.4034	14.8266
	-1	47.3333			-2.72372	81.3045	14.7995
	-1	28.8049			-2.71772	81.2055	14.7724
	-1	56.9216			-2.71171	81.1066	14.7452
	-1	56.3036			-2.70571	81.0077	14.7181
	-1	47.4727			-2.6997	80.9088	14.691
	-1	70.8667			-2.69369	80.8098	14.6639
	-1	68.7069			-2.68769	80.7109	14.6368
	-1	44.3288			-2.68168	80.612	14.6097
	-1	42.9048			-2.67568	80.5131	14.5827
	-1	43.96			-2.66967	80.4142	14.5556
	-1	53.1343			-2.66366	80.3153	14.5286
	-1	54.3235			-2.65766	80.2163	14.5015
	-1	34.4091			-2.65165	80.1174	14.4745
	-1	45.4359			-2.64565	80.0185	14.4475
	-1	41.8909			-2.63964	79.9196	14.4205
	-1	57.7627			-2.63363	79.8206	14.3935
	-1	45.3396			-2.62763	79.7217	14.3665
	-1	28.8438			-2.62162	79.6228	14.3395
	-1	43.1884			-2.61562	79.5239	14.3126
	-1	72.5135			-2.60961	79.425	14.2856
	-1	51.1481			-2.6036	79.326	14.2587
	-1	64.1633			-2.5976	79.2271	14.2317
	-1	40.0735			-2.59159	79.1282	14.2048
	-1	49.1714			-2.58559	79.0293	14.1779
	-1	26.9565			-2.57958	78.9304	14.151
	-1	30.413			-2.57357	78.8314	14.1242
	2	49.7955			-2.56757	78.7325	14.0973
	2	59.9811			-2.56156	78.6336	14.0704
	2	15.8852			-2.55556	78.5347	14.0436
	2	19.2308			-2.54955	78.4357	14.0167
	2	26.6508			-2.54354	78.3368	13.9899
	2	36.6441			-2.53754	78.2379	13.9631
	2	33.6364			-2.53153	78.139	13.9363
	2	8.2439			-2.52553	78.0401	13.9095
	2	51.38			-2.51952	77.9411	13.8828
	2	48.7812			-2.51351	77.8422	13.856
	2	45.6458			-2.50751	77.7433	13.8292
	2	28.4412			-2.5015	77.6444	13.8025
	2	47.5122			-2.4955	77.5455	13.7758
	2	49.7143			-2.48949	77.4465	13.7491
	2	15.1091			-2.48348	77.3476	13.7224
	2	8.51064			-2.47748	77.2487	13.6957
	2	14.1579			-2.47147	77.1498	13.669
	2	24.5769			-2.46547	77.0508	13.6423
	2	4.6			-2.45946	76.9519	13.6157
	2	42.1395			-2.45345	76.853	13.5891
	2	39.1731			-2.44745	76.7541	13.5624
	2	9.625			-2.44144	76.6552	13.5358
	2	12.7755			-2.43544	76.5563	13.5092
	2	6.1875			-2.42943	76.4573	13.4826
	2	-17			-2.42342	76.3584	13.4561
	2	11.4815			-2.41742	76.2595	13.4295
	2	7.0339			-2.41141	76.1606	13.403
	2	-7.45652			-2.40541	76.0616	13.3764
	2	8.03571			-2.3994	75.9627	13.3499
	2	-3			-2.39339	75.8638	13.3234
	2	8.75			-2.38739	75.7649	13.2969
	2	-16.2			-2.38138	75.666	13.2705
	2	12.0833			-2.37538	75.567	13.244
	2	5.4			-2.36937	75.4681	13.2176
	2	-10.6304			-2.36336	75.3692	13.1911
	2	16.7097			-2.35736	75.2703	13.1647
	0	-29.5476			-2.35135	75.1714	13.1383
	0	-19.5517			-2.34535	75.0724	13.1119
	0	-5.83333			-2.33934	74.9735	13.0855
	0	-12.3721			-2.33333	74.8746	13.0592
	0	-14.6557			-2.32733	74.7757	13.0328
	0	2.71429			-2.32132	74.6767	13.0065
	0	-5.98			-2.31532	74.5778	12.9802
	0	-15.383			-2.30931	74.4789	12.9539
	0	6.45098			-2.3033	74.38	12.9276
	0	-8.8125			-2.2973	74.2811	12.9013
	0	16.5345			-2.29129	74.1821	12.8751
	0	0.823529			-2.28529	74.0832	12.8488
	0	-51.125			-2.27928	73.9843	12.8226
	0	-53.8868			-2.27327	73.8854	12.7964
	0	-39.7907			-2.26727	73.7865	12.7702
	0	-29.5849			-2.26126	73.6875	12.744
	0	-17.3393			-2.25526	73.5886	12.7178
	0	-13.7077			-2.24925	73.4897	12.6917
	0	-0.829787			-2.24324	73.3908	12.6656
	0	-12.0926			-2.23724	73.2919	12.6394
	0	6.94444			-2.23123	73.1929	12.6134
	0	-3			-2.22523	73.094	12.5873
	0	18.5246			-2.21922	72.9951	12.5612
	0	16.0851			-2.21321	72.8962	12.5351
	0	-51.1304			-2.20721	72.7973	12.5091
	0	-31.0484			-2.2012	72.6983	12.4831
	0	-20.9512			-2.1952	72.5994	12.4571
	0	-14.4694			-2.18919	72.5005	12.4311
	0	-1.73913			-2.18318	72.4016	12.4051
	0	-11.1			-2.17718	72.3026	12.3792
	0	4.64815			-2.17117	72.2037	12.3533
	0	-24.2807			-2.16517	72.1048	12.3274
	0	-20.14			-2.15916	72.0059	12.3015
	0	-27.1143			-2.15315	71.907	12.2756
	0	4.11667			-2.14715	71.808	12.2497
	0	8.125			-2.14114	71.7091	12.2239
					-2.13514	71.6102	12.198
					-2.12913	71.5113	12.1722
					-2.12312	71.4124	12.1464
					-2.11712	71.3134	12.1207
					-2.11111	71.2145	12.0949
					-2.10511	71.1156	12.0692
					-2.0991	71.0167	12.0435
					-2.09309	70.9178	12.0178
					-2.08709	70.8188	11.9921
					-2.08108	70.7199	11.9664
					-2.07508	70.621	11.9408
					-2.06907	70.5221	11.9152
					-2.06306	70.4232	11.8896
					-2.05706	70.3242	11.864
					-2.05105	70.2253	11.8384
					-2.04505	70.1264	11.8129
					-2.03904	70.0275	11.7873
					-2.03303	69.9285	11.7618
					-2.02703	69.8296	11.7364
					-2.02102	69.7307	11.7109
					-2.01502	69.6318	11.6854
					-2.00901	69.5329	11.66
					-2.003	69.4339	11.6346
					-1.997	69.335	11.6092
					-1.99099	69.2361	11.5839
					-1.98498	69.1372	11.5585
					-1.97898	69.0383	11.5332
					-1.97297	68.9393	11.5079
					-1.96697	68.8404	11.4826
					-1.96096	68.7415	11.4574
					-1.95495	68.6426	11.4322
					-1.94895	68.5437	11.4069
					-1.94294	68.4447	11.3818
					-1.93694	68.3458	11.3566
					-1.93093	68.2469	11.3314
					-1.92492	68.148	11.3063
					-1.91892	68.049	11.2812
					-1.91291	67.9501	11.2561
					-1.90691	67.8512	11.2311
					-1.9009	67.7523	11.2061
					-1.89489	67.6534	11.181
					-1.88889	67.5544	11.1561
					-1.88288	67.4555	11.1311
					-1.87688	67.3566	11.1062
					-1.87087	67.2577	11.0812
					-1.86486	67.1588	11.0564
					-1.85886	67.0598	11.0315
					-1.85285	66.9609	11.0067
					-1.84685	66.862	10.9818
					-1.84084	66.7631	10.957
					-1.83483	66.6642	10.9323
					-1.82883	66.5652	10.9075
					-1.82282	66.4663	10.8828
					-1.81682	66.3674	10.8581
					-1.81081	66.2685	10.8335
					-1.8048	66.1696	10.8088
					-1.7988	66.0706	10.7842
					-1.79279	65.9717	10.7596
					-1.78679	65.8728	10.735
					-1.78078	65.7739	10.7105
					-1.77477	65.6749	10.686
					-1.76877	65.576	10.6615
					-1.76276	65.4771	10.6371
					-1.75676	65.3782	10.6126
					-1.75075	65.2793	10.5882
					-1.74474	65.1803	10.5639
					-1.73874	65.0814	10.5395
					-1.73273	64.9825	10.5152
					-1.72673	64.8836	10.4909
					-1.72072	64.7846	10.4666
					-1.71471	64.6857	10.4424
					-1.70871	64.5868	10.4182
					-1.7027	64.4879	10.394
					-1.6967	64.389	10.3699
					-1.69069	64.2901	10.3458
					-1.68468	64.1911	10.3217
					-1.67868	64.0922	10.2976
					-1.67267	63.9933	10.2736
					-1.66667	63.8944	10.2496
					-1.66066	63.7955	10.2256
					-1.65465	63.6965	10.2017
					-1.64865	63.5976	10.1778
					-1.64264	63.4987	10.1539
					-1.63664	63.3998	10.13
					-1.63063	63.3008	10.1062
					-1.62462	63.2019	10.0824
					-1.61862	63.103	10.0587
					-1.61261	63.0041	10.035
					-1.60661	62.9052	10.0113
					-1.6006	62.8062	9.98763
					-1.59459	62.7073	9.96401
					-1.58859	62.6084	9.94042
					-1.58258	62.5095	9.91687
					-1.57658	62.4106	9.89335
					-1.57057	62.3116	9.86986
					-1.56456	62.2127	9.84641
					-1.55856	62.1138	9.82299
					-1.55255	62.0149	9.7996
					-1.54655	61.916	9.77625
					-1.54054	61.817	9.75294
					-1.53453	61.7181	9.72966
					-1.52853	61.6192	9.70641
					-1.52252	61.5203	9.6832
					-1.51652	61.4213	9.66003
					-1.51051	61.3224	9.63689
					-1.5045	61.2235	9.61379
					-1.4985	61.1246	9.59073
					-1.49249	61.0257	9.5677
					-1.48649	60.9267	9.54471
					-1.48048	60.8278	9.52176
					-1.47447	60.7289	9.49884
					-1.46847	60.63	9.47597
					-1.46246	60.5311	9.45313
					-1.45646	60.4321	9.43033
					-1.45045	60.3332	9.40757
					-1.44444	60.2343	9.38485
					-1.43844	60.1354	9.36217
					-1.43243	60.0365	9.33953
					-1.42643	59.9375	9.31692
					-1.42042	59.8386	9.29436
					-1.41441	59.7397	9.27184
					-1.40841	59.6408	9.24936
					-1.4024	59.5418	9.22692
					-1.3964	59.4429	9.20453
					-1.39039	59.344	9.18217
					-1.38438	59.2451	9.15986
					-1.37838	59.1462	9.13759
					-1.37237	59.0472	9.11536
					-1.36637	58.9483	9.09318
					-1.36036	58.8494	9.07103
					-1.35435	58.7505	9.04894
					-1.34835	58.6516	9.02688
					-1.34234	58.5526	9.00487
					-1.33634	58.4537	8.98291
					-1.33033	58.3548	8.96099
					-1.32432	58.2559	8.93912
					-1.31832	58.157	8.91729
					-1.31231	58.058	8.8955
					-1.30631	57.9591	8.87377
					-1.3003	57.8602	8.85208
					-1.29429	57.7613	8.83044
					-1.28829	57.6624	8.80884
					-1.28228	57.5634	8.78729
					-1.27628	57.4645	8.7658
					-1.27027	57.3656	8.74434
					-1.26426	57.2667	8.72294
					-1.25826	57.1677	8.70159
					-1.25225	57.0688	8.68029
					-1.24625	56.9699	8.65903
					-1.24024	56.871	8.63783
					-1.23423	56.7721	8.61668
					-1.22823	56.6731	8.59558
					-1.22222	56.5742	8.57453
					-1.21622	56.4753	8.55353
					-1.21021	56.3764	8.53258
					-1.2042	56.2775	8.51169
					-1.1982	56.1785	8.49085
					-1.19219	56.0796	8.47006
					-1.18619	55.9807	8.44933
					-1.18018	55.8818	8.42865
					-1.17417	55.7829	8.40802
					-1.16817	55.6839	8.38745
					-1.16216	55.585	8.36694
					-1.15616	55.4861	8.34648
					-1.15015	55.3872	8.32608
					-1.14414	55.2882	8.30573
					-1.13814	55.1893	8.28544
					-1.13213	55.0904	8.26521
					-1.12613	54.9915	8.24503
					-1.12012	54.8926	8.22492
					-1.11411	54.7936	8.20486
					-1.10811	54.6947	8.18486
					-1.1021	54.5958	8.16492
					-1.0961	54.4969	8.14504
					-1.09009	54.398	8.12522
					-1.08408	54.299	8.10547
					-1.07808	54.2001	8.08577
					-1.07207	54.1012	8.06613
					-1.06607	54.0023	8.04656
					-1.06006	53.9034	8.02705
					-1.05405	53.8044	8.00761
					-1.04805	53.7055	7.98822
					-1.04204	53.6066	7.9689
					-1.03604	53.5077	7.94965
					-1.03003	53.4087	7.93046
					-1.02402	53.3098	7.91134
					-1.01802	53.2109	7.89228
					-1.01201	53.112	7.87328
					-1.00601	53.0131	7.85436
					-1	52.9141	7.8355
					-0.993994	52.8152	7.81671
					-0.987988	52.7163	7.79799
					-0.981982	52.6174	7.77934
					-0.975976	52.5185	7.76075
					-0.96997	52.4195	7.74224
					-0.963964	52.3206	7.7238
					-0.957958	52.2217	7.70542
					-0.951952	52.1228	7.68712
					-0.945946	52.0239	7.66889
					-0.93994	51.9249	7.65074
					-0.933934	51.826	7.63265
					-0.927928	51.7271	7.61464
					-0.921922	51.6282	7.5967
					-0.915916	51.5292	7.57884
					-0.90991	51.4303	7.56105
					-0.903904	51.3314	7.54334
					-0.897898	51.2325	7.52571
					-0.891892	51.1336	7.50815
					-0.885886	51.0346	7.49066
					-0.87988	50.9357	7.47326
					-0.873874	50.8368	7.45593
					-0.867868	50.7379	7.43868
					-0.861862	50.639	7.42152
					-0.855856	50.54	7.40443
					-0.84985	50.4411	7.38742
					-0.843844	50.3422	7.37049
					-0.837838	50.2433	7.35365
					-0.831832	50.1444	7.33688
					-0.825826	50.0454	7.3202
					-0.81982	49.9465	7.3036
					-0.813814	49.8476	7.28709
					-0.807808	49.7487	7.27066
					-0.801802	49.6498	7.25431
					-0.795796	49.5508	7.23805
					-0.78979	49.4519	7.22188
					-0.783784	49.353	7.20579
					-0.777778	49.2541	7.18979
					-0.771772	49.1551	7.17388
					-0.765766	49.0562	7.15806
					-0.75976	48.9573	7.14232
					-0.753754	48.8584	7.12668
					-0.747748	48.7595	7.11113
					-0.741742	48.6605	7.09566
					-0.735736	48.5616	7.08029
					-0.72973	48.4627	7.06501
					-0.723724	48.3638	7.04982
					-0.717718	48.2649	7.03472
					-0.711712	48.1659	7.01972
					-0.705706	48.067	7.00482
					-0.6997	47.9681	6.99
					-0.693694	47.8692	6.97529
					-0.687688	47.7703	6.96067
					-0.681682	47.6713	6.94614
					-0.675676	47.5724	6.93172
					-0.66967	47.4735	6.91739
					-0.663664	47.3746	6.90316
					-0.657658	47.2756	6.88903
					-0.651652	47.1767	6.875
					-0.645646	47.0778	6.86107
					-0.63964	46.9789	6.84724
					-0.633634	46.88	6.83351
					-0.627628	46.781	6.81989
					-0.621622	46.6821	6.80637
					-0.615616	46.5832	6.79295
					-0.60961	46.4843	6.77963
					-0.603604	46.3854	6.76642
					-0.597598	46.2864	6.75332
					-0.591592	46.1875	6.74032
					-0.585586	46.0886	6.72743
					-0.57958	45.9897	6.71464
					-0.573574	45.8908	6.70196
					-0.567568	45.7918	6.6894
					-0.561562	45.6929	6.67693
					-0.555556	45.594	6.66458
					-0.54955	45.4951	6.65234
					-0.543543	45.3962	6.64022
					-0.537538	45.2972	6.6282
					-0.531532	45.1983	6.61629
					-0.525525	45.0994	6.6045
					-0.51952	45.0005	6.59282
					-0.513513	44.9015	6.58125
					-0.507508	44.8026	6.5698
					-0.501502	44.7037	6.55847
					-0.495495	44.6048	6.54725
					-0.48949	44.5059	6.53614
					-0.483484	44.4069	6.52515
					-0.477477	44.308	6.51428
					-0.471471	44.2091	6.50353
					-0.465465	44.1102	6.4929
					-0.459459	44.0113	6.48239
					-0.453453	43.9123	6.47199
					-0.447447	43.8134	6.46172
					-0.441441	43.7145	6.45157
					-0.435435	43.6156	6.44153
					-0.429429	43.5167	6.43162
					-0.423423	43.4177	6.42184
					-0.417417	43.3188	6.41217
					-0.411411	43.2199	6.40263
					-0.405405	43.121	6.39322
					-0.399399	43.0221	6.38393
					-0.393393	42.9231	6.37476
					-0.387387	42.8242	6.36572
					-0.381381	42.7253	6.35681
					-0.375375	42.6264	6.34803
					-0.369369	42.5274	6.33937
					-0.363363	42.4285	6.33084
					-0.357357	42.3296	6.32244
					-0.351351	42.2307	6.31417
					-0.345345	42.1318	6.30602
					-0.339339	42.0328	6.29801
					-0.333333	41.9339	6.29013
					-0.327327	41.835	6.28238
					-0.321321	41.7361	6.27476
					-0.315315	41.6372	6.26727
					-0.309309	41.5382	6.25992
					-0.303303	41.4393	6.2527
					-0.297297	41.3404	6.24561
					-0.291291	41.2415	6.23865
					-0.285285	41.1425	6.23184
					-0.279279	41.0436	6.22515
					-0.273273	40.9447	6.2186
					-0.267267	40.8458	6.21219
					-0.261261	40.7469	6.20591
					-0.255255	40.6479	6.19977
					-0.249249	40.549	6.19376
					-0.243243	40.4501	6.1879
					-0.237237	40.3512	6.18217
					-0.231231	40.2523	6.17658
					-0.225225	40.1533	6.17113
					-0.219219	40.0544	6.16581
					-0.213213	39.9555	6.16064
					-0.207207	39.8566	6.1556
					-0.201201	39.7577	6.15071
					-0.195195	39.6587	6.14595
					-0.189189	39.5598	6.14134
					-0.183183	39.4609	6.13687
					-0.177177	39.362	6.13253
					-0.171171	39.2631	6.12834
					-0.165165	39.1641	6.12429
					-0.159159	39.0652	6.12039
					-0.153153	38.9663	6.11662
					-0.147147	38.8674	6.113
					-0.141141	38.7684	6.10952
					-0.135135	38.6695	6.10619
					-0.129129	38.5706	6.10299
					-0.123123	38.4717	6.09995
					-0.117117	38.3728	6.09704
					-0.111111	38.2738	6.09428
					-0.105105	38.1749	6.09166
					-0.0990991	38.076	6.08919
					-0.0930931	37.9771	6.08686
					-0.0870871	37.8782	6.08468
					-0.0810811	37.7792	6.08264
					-0.0750751	37.6803	6.08075
					-0.0690691	37.5814	6.079
					-0.0630631	37.4825	6.07739
					-0.0570571	37.3836	6.07594
					-0.0510511	37.2846	6.07462
					-0.045045	37.1857	6.07346
					-0.039039	37.0868	6.07244
					-0.033033	36.9879	6.07156
					-0.027027	36.889	6.07083
					-0.021021	36.79	6.07025
					-0.015015	36.6911	6.06981
					-0.00900901	36.5922	6.06952
					-0.003003	36.4933	6.06937
					0.003003	36.3943	6.06937
					0.00900901	36.2954	6.06952
					0.015015	36.1965	6.06981
					0.021021	36.0976	6.07025
					0.027027	35.9987	6.07083
					0.033033	35.8997	6.07156
					0.039039	35.8008	6.07244
					0.045045	35.7019	6.07346
					0.0510511	35.603	6.07462
					0.0570571	35.5041	6.07594
					0.0630631	35.4051	6.07739
					0.0690691	35.3062	6.079
					0.0750751	35.2073	6.08075
					0.0810811	35.1084	6.08264
					0.0870871	35.0095	6.08468
					0.0930931	34.9105	6.08686
					0.0990991	34.8116	6.08919
					0.105105	34.7127	6.09166
					0.111111	34.6138	6.09428
					0.117117	34.5148	6.09704
					0.123123	34.4159	6.09995
					0.129129	34.317	6.10299
					0.135135	34.2181	6.10619
					0.141141	34.1192	6.10952
					0.147147	34.0202	6.113
					0.153153	33.9213	6.11662
					0.159159	33.8224	6.12039
					0.165165	33.7235	6.12429
					0.171171	33.6246	6.12834
					0.177177	33.5256	6.13253
					0.183183	33.4267	6.13687
					0.189189	33.3278	6.14134
					0.195195	33.2289	6.14595
					0.201201	33.13	6.15071
					0.207207	33.031	6.1556
					0.213213	32.9321	6.16064
					0.219219	32.8332	6.16581
					0.225225	32.7343	6.17113
					0.231231	32.6354	6.17658
					0.237237	32.5364	6.18217
					0.243243	32.4375	6.1879
					0.249249	32.3386	6.19376
					0.255255	32.2397	6.19977
					0.261261	32.1407	6.20591
					0.267267	32.0418	6.21219
					0.273273	31.9429	6.2186
					0.279279	31.844	6.22515
					0.285285	31.7451	6.23184
					0.291291	31.6461	6.23865
					0.297297	31.5472	6.24561
					0.303303	31.4483	6.2527
					0.309309	31.3494	6.25992
					0.315315	31.2505	6.26727
					0.321321	31.1515	6.27476
					0.327327	31.0526	6.28238
					0.333333	30.9537	6.29013
					0.339339	30.8548	6.29801
					0.345345	30.7559	6.30602
					0.351351	30.6569	6.31417
					0.357357	30.558	6.32244
					0.363363	30.4591	6.33084
					0.369369	30.3602	6.33937
					0.375375	30.2612	6.34803
					0.381381	30.1623	6.35681
					0.387387	30.0634	6.36572
					0.393393	29.9645	6.37476
					0.399399	29.8656	6.38393
					0.405405	29.7666	6.39322
					0.411411	29.6677	6.40263
					0.417417	29.5688	6.41217
					0.423423	29.4699	6.42184
					0.429429	29.371	6.43162
					0.435435	29.272	6.44153
					0.441441	29.1731	6.45157
					0.447447	29.0742	6.46172
					0.453453	28.9753	6.47199
					0.459459	28.8764	6.48239
					0.465465	28.7774	6.4929
					0.471471	28.6785	6.50353
					0.477477	28.5796	6.51428
					0.483484	28.4807	6.52515
					0.48949	28.3818	6.53614
					0.495495	28.2828	6.54725
					0.501502	28.1839	6.55847
					0.507508	28.085	6.5698
					0.513513	27.9861	6.58125
					0.51952	27.8871	6.59282
					0.525525	27.7882	6.6045
					0.531532	27.6893	6.61629
					0.537538	27.5904	6.6282
					0.543543	27.4915	6.64022
					0.54955	27.3925	6.65234
					0.555556	27.2936	6.66458
					0.561562	27.1947	6.67693
					0.567568	27.0958	6.6894
					0.573574	26.9969	6.70196
					0.57958	26.8979	6.71464
					0.585586	26.799	6.72743
					0.591592	26.7001	6.74032
					0.597598	26.6012	6.75332
					0.603604	26.5023	6.76642
					0.60961	26.4033	6.77963
					0.615616	26.3044	6.79295
					0.621622	26.2055	6.80637
					0.627628	26.1066	6.81989
					0.633634	26.0076	6.83351
					0.63964	25.9087	6.84724
					0.645646	25.8098	6.86107
					0.651652	25.7109	6.875
					0.657658	25.612	6.88903
					0.663664	25.513	6.90316
					0.66967	25.4141	6.91739
					0.675676	25.3152	6.93172
					0.681682	25.2163	6.94614
					0.687688	25.1174	6.96067
					0.693694	25.0184	6.97529
					0.6997	24.9195	6.99
					0.705706	24.8206	7.00482
					0.711712	24.7217	7.01972
					0.717718	24.6228	7.03472
					0.723724	24.5238	7.04982
					0.72973	24.4249	7.06501
					0.735736	24.326	7.08029
					0.741742	24.2271	7.09566
					0.747748	24.1281	7.11113
					0.753754	24.0292	7.12668
					0.75976	23.9303	7.14232
					0.765766	23.8314	7.15806
					0.771772	23.7325	7.17388
					0.777778	23.6335	7.18979
					0.783784	23.5346	7.20579
					0.78979	23.4357	7.22188
					0.795796	23.3368	7.23805
					0.801802	23.2379	7.25431
					0.807808	23.1389	7.27066
					0.813814	23.04	7.28709
					0.81982	22.9411	7.3036
					0.825826	22.8422	7.3202
					0.831832	22.7433	7.33688
					0.837838	22.6443	7.35365
					0.843844	22.5454	7.37049
					0.84985	22.4465	7.38742
					0.855856	22.3476	7.40443
					0.861862	22.2487	7.42152
					0.867868	22.1497	7.43868
					0.873874	22.0508	7.45593
					0.87988	21.9519	7.47326
					0.885886	21.853	7.49066
					0.891892	21.754	7.50815
					0.897898	21.6551	7.52571
					0.903904	21.5562	7.54334
					0.90991	21.4573	7.56105
					0.915916	21.3584	7.57884
					0.921922	21.2594	7.5967
					0.927928	21.1605	7.61464
					0.933934	21.0616	7.63265
					0.93994	20.9627	7.65074
					0.945946	20.8638	7.66889
					0.951952	20.7648	7.68712
					0.957958	20.6659	7.70542
					0.963964	20.567	7.7238
					0.96997	20.4681	7.74224
					0.975976	20.3692	7.76075
					0.981982	20.2702	7.77934
					0.987988	20.1713	7.79799
					0.993994	20.0724	7.81671
					1	19.9735	7.8355
					1.00601	19.8745	7.85436
					1.01201	19.7756	7.87328
					1.01802	19.6767	7.89228
					1.02402	19.5778	7.91134
					1.03003	19.4789	7.93046
					1.03604	19.3799	7.94965
					1.04204	19.281	7.9689
					1.04805	19.1821	7.98822
					1.05405	19.0832	8.00761
					1.06006	18.9843	8.02705
					1.06607	18.8853	8.04656
					1.07207	18.7864	8.06613
					1.07808	18.6875	8.08577
					1.08408	18.5886	8.10547
					1.09009	18.4897	8.12522
					1.0961	18.3907	8.14504
					1.1021	18.2918	8.16492
					1.10811	18.1929	8.18486
					1.11411	18.094	8.20486
					1.12012	17.995	8.22492
					1.12613	17.8961	8.24503
					1.13213	17.7972	8.26521
					1.13814	17.6983	8.28544
					1.14414	17.5994	8.30573
					1.15015	17.5004	8.32608
					1.15616	17.4015	8.34648
					1.16216	17.3026	8.36694
					1.16817	17.2037	8.38745
					1.17417	17.1048	8.40802
					1.18018	17.0058	8.42865
					1.18619	16.9069	8.44933
					1.19219	16.808	8.47006
					1.1982	16.7091	8.49085
					1.2042	16.6102	8.51169
					1.21021	16.5112	8.53258
					1.21622	16.4123	8.55353
					1.22222	16.3134	8.57453
					1.22823	16.2145	8.59558
					1.23423	16.1156	8.61668
					1.24024	16.0166	8.63783
					1.24625	15.9177	8.65903
					1.25225	15.8188	8.68029
					1.25826	15.7199	8.70159
					1.26426	15.6209	8.72294
					1.27027	15.522	8.74434
					1.27628	15.4231	8.7658
					1.28228	15.3242	8.78729
					1.28829	15.2253	8.80884
					1.29429	15.1263	8.83044
					1.3003	15.0274	8.85208
					1.30631	14.9285	8.87377
					1.31231	14.8296	8.8955
					1.31832	14.7307	8.91729
					1.32432	14.6317	8.93912
					1.33033	14.5328	8.96099
					1.33634	14.4339	8.98291
					1.34234	14.335	9.00487
					1.34835	14.2361	9.02688
					1.35435	14.1371	9.04894
					1.36036	14.0382	9.07103
					1.36637	13.9393	9.09318
					1.37237	13.8404	9.11536
					1.37838	13.7415	9.13759
					1.38438	13.6425	9.15986
					1.39039	13.5436	9.18217
					1.3964	13.4447	9.20453
					1.4024	13.3458	9.22692
					1.40841	13.2468	9.24936
					1.41441	13.1479	9.27184
					1.42042	13.049	9.29436
					1.42643	12.9501	9.31692
					1.43243	12.8512	9.33953
					1.43844	12.7522	9.36217
					1.44444	12.6533	9.38485
					1.45045	12.5544	9.40757
					1.45646	12.4555	9.43033
					1.46246	12.3566	9.45313
					1.46847	12.2576	9.47597
					1.47447	12.1587	9.49884
					1.48048	12.0598	9.52176
					1.48649	11.9609	9.54471
					1.49249	11.862	9.5677
					1.4985	11.763	9.59073
					1.5045	11.6641	9.61379
					1.51051	11.5652	9.63689
					1.51652	11.4663	9.66003
					1.52252	11.3673	9.6832
					1.52853	11.2684	9.70641
					1.53453	11.1695	9.72966
					1.54054	11.0706	9.75294
					1.54655	10.9717	9.77625
					1.55255	10.8727	9.7996
					1.55856	10.7738	9.82299
					1.56456	10.6749	9.84641
					1.57057	10.576	9.86986
					1.57658	10.4771	9.89335
					1.58258	10.3781	9.91687
					1.58859	10.2792	9.94042
					1.59459	10.1803	9.96401
					1.6006	10.0814	9.98763
					1.60661	9.98245	10.0113
					1.61261	9.88353	10.035
					1.61862	9.78461	10.0587
					1.62462	9.68569	10.0824
					1.63063	9.58677	10.1062
					1.63664	9.48785	10.13
					1.64264	9.38893	10.1539
					1.64865	9.29001	10.1778
					1.65465	9.19109	10.2017
					1.66066	9.09217	10.2256
					1.66667	8.99324	10.2496
					1.67267	8.89432	10.2736
					1.67868	8.7954	10.2976
					1.68468	8.69648	10.3217
					1.69069	8.59756	10.3458
					1.6967	8.49864	10.3699
					1.7027	8.39972	10.394
					1.70871	8.3008	10.4182
					1.71471	8.20188	10.4424
					1.72072	8.10296	10.4666
					1.72673	8.00404	10.4909
					1.73273	7.90511	10.5152
					1.73874	7.80619	10.5395
					1.74474	7.70727	10.5639
					1.75075	7.60835	10.5882
					1.75676	7.50943	10.6126
					1.76276	7.41051	10.6371
					1.76877	7.31159	10.6615
					1.77477	7.21267	10.686
					1.78078	7.11375	10.7105
					1.78679	7.01483	10.735
					1.79279	6.91591	10.7596
					1.7988	6.81698	10.7842
					1.8048	6.71806	10.8088
					1.81081	6.61914	10.8335
					1.81682	6.52022	10.8581
					1.82282	6.4213	10.8828
					1.82883	6.32238	10.9075
					1.83483	6.22346	10.9323
					1.84084	6.12454	10.957
					1.84685	6.02562	10.9818
					1.85285	5.9267	11.0067
					1.85886	5.82777	11.0315
					1.86486	5.72885	11.0564
					1.87087	5.62993	11.0812
					1.87688	5.53101	11.1062
					1.88288	5.43209	11.1311
					1.88889	5.33317	11.1561
					1.89489	5.23425	11.181
					1.9009	5.13533	11.2061
					1.90691	5.03641	11.2311
					1.91291	4.93749	11.2561
					1.91892	4.83857	11.2812
					1.92492	4.73964	11.3063
					1.93093	4.64072	11.3314
					1.93694	4.5418	11.3566
					1.94294	4.44288	11.3818
					1.94895	4.34396	11.4069
					1.95495	4.24504	11.4322
					1.96096	4.14612	11.4574
					1.96697	4.0472	11.4826
					1.97297	3.94828	11.5079
					1.97898	3.84936	11.5332
					1.98498	3.75043	11.5585
					1.99099	3.65151	11.5839
					1.997	3.55259	11.6092
					2.003	3.45367	11.6346
					2.00901	3.35475	11.66
					2.01502	3.25583	11.6854
					2.02102	3.15691	11.7109
					2.02703	3.05799	11.7364
					2.03303	2.95907	11.7618
					2.03904	2.86015	11.7873
					2.04505	2.76123	11.8129
					2.05105	2.6623	11.8384
					2.05706	2.56338	11.864
					2.06306	2.46446	11.8896
					2.06907	2.36554	11.9152
					2.07508	2.26662	11.9408
					2.08108	2.1677	11.9664
					2.08709	2.06878	11.9921
					2.09309	1.96986	12.0178
					2.0991	1.87094	12.0435
					2.10511	1.77202	12.0692
					2.11111	1.67309	12.0949
					2.11712	1.57417	12.1207
					2.12312	1.47525	12.1464
					2.12913	1.37633	12.1722
					2.13514	1.27741	12.198
					2.14114	1.17849	12.2239
					2.14715	1.07957	12.2497
					2.15315	0.980648	12.2756
					2.15916	0.881727	12.3015
					2.16517	0.782806	12.3274
					2.17117	0.683885	12.3533
					2.17718	0.584964	12.3792
					2.18318	0.486044	12.4051
					2.18919	0.387123	12.4311
					2.1952	0.288202	12.4571
					2.2012	0.189281	12.4831
					2.20721	0.0903597	12.5091
					2.21321	-0.00856122	12.5351
					2.21922	-0.107482	12.5612
					2.22523	-0.206403	12.5873
					2.23123	-0.305324	12.6134
					2.23724	-0.404245	12.6394
					2.24324	-0.503166	12.6656
					2.24925	-0.602087	12.6917
					2.25526	-0.701008	12.7178
					2.26126	-0.799929	12.744
					2.26727	-0.89885	12.7702
					2.27327	-0.997771	12.7964
					2.27928	-1.09669	12.8226
					2.28529	-1.19561	12.8488
					2.29129	-1.29453	12.8751
					2.2973	-1.39345	12.9013
					2.3033	-1.49238	12.9276
					2.30931	-1.5913	12.9539
					2.31532	-1.69022	12.9802
					2.32132	-1.78914	13.0065
					2.32733	-1.88806	13.0328
					2.33333	-1.98698	13.0592
					2.33934	-2.0859	13.0855
					2.34535	-2.18482	13.1119
					2.35135	-2.28374	13.1383
					2.35736	-2.38266	13.1647
					2.36336	-2.48158	13.1911
					2.36937	-2.58051	13.2176
					2.37538	-2.67943	13.244
					2.38138	-2.77835	13.2705
					2.38739	-2.87727	13.2969
					2.39339	-2.97619	13.3234
					2.3994	-3.07511	13.3499
					2.40541	-3.17403	13.3764
					2.41141	-3.27295	13.403
					2.41742	-3.37187	13.4295
					2.42342	-3.47079	13.4561
					2.42943	-3.56972	13.4826
					2.43544	-3.66864	13.5092
					2.44144	-3.76756	13.5358
					2.44745	-3.86648	13.5624
					2.45345	-3.9654	13.5891
					2.45946	-4.06432	13.6157
					2.46547	-4.16324	13.6423
					2.47147	-4.26216	13.669
					2.47748	-4.36108	13.6957
					2.48348	-4.46	13.7224
					2.48949	-4.55892	13.7491
					2.4955	-4.65785	13.7758
					2.5015	-4.75677	13.8025
					2.50751	-4.85569	13.8292
					2.51351	-4.95461	13.856
					2.51952	-5.05353	13.8828
					2.52553	-5.15245	13.9095
					2.53153	-5.25137	13.9363
					2.53754	-5.35029	13.9631
					2.54354	-5.44921	13.9899
					2.54955	-5.54813	14.0167
					2.55556	-5.64705	14.0436
					2.56156	-5.74598	14.0704
					2.56757	-5.8449	14.0973
					2.57357	-5.94382	14.1242
					2.57958	-6.04274	14.151
					2.58559	-6.14166	14.1779
					2.59159	-6.24058	14.2048
					2.5976	-6.3395	14.2317
					2.6036	-6.43842	14.2587
					2.60961	-6.53734	14.2856
					2.61562	-6.63626	14.3126
					2.62162	-6.73519	14.3395
					2.62763	-6.83411	14.3665
					2.63363	-6.93303	14.3935
					2.63964	-7.03195	14.4205
					2.64565	-7.13087	14.4475
					2.65165	-7.22979	14.4745
					2.65766	-7.32871	14.5015
					2.66366	-7.42763	14.5286
					2.66967	-7.52655	14.5556
					2.67568	-7.62547	14.5827
					2.68168	-7.7244	14.6097
					2.68769	-7.82332	14.6368
					2.69369	-7.92224	14.6639
					2.6997	-8.02116	14.691
					2.70571	-8.12008	14.7181
					2.71171	-8.219	14.7452
					2.71772	-8.31792	14.7724
					2.72372	-8.41684	14.7995
					2.72973	-8.51576	14.8266
					2.73574	-8.61468	14.8538
					2.74174	-8.7136	14.881
					2.74775	-8.81253	14.9082
					2.75375	-8.91145	14.9353
					2.75976	-9.01037	14.9625
					2.76577	-9.10929	14.9898
					2.77177	-9.20821	15.017
					2.77778	-9.30713	15.0442
					2.78378	-9.40605	15.0714
					2.78979	-9.50497	15.0987
					2.7958	-9.60389	15.1259
					2.8018	-9.70281	15.1532
					2.80781	-9.80174	15.1805
					2.81381	-9.90066	15.2078
					2.81982	-9.99958	15.2351
					2.82583	-10.0985	15.2624
					2.83183	-10.1974	15.2897
					2.83784	-10.2963	15.317
					2.84384	-10.3953	15.3443
					2.84985	-10.4942	15.3717
					2.85586	-10.5931	15.399
					2.86186	-10.692	15.4264
					2.86787	-10.7909	15.4538
					2.87387	-10.8899	15.4811
					2.87988	-10.9888	15.5085
					2.88589	-11.0877	15.5359
					2.89189	-11.1866	15.5633
					2.8979	-11.2855	15.5907
					2.9039	-11.3845	15.6181
					2.90991	-11.4834	15.6456
					2.91592	-11.5823	15.673
					2.92192	-11.6812	15.7005
					2.92793	-11.7802	15.7279
					2.93393	-11.8791	15.7554
					2.93994	-11.978	15.7828
					2.94595	-12.0769	15.8103
					2.95195	-12.1758	15.8378
					2.95796	-12.2748	15.8653
					2.96396	-12.3737	15.8928
					2.96997	-12.4726	15.9203
					2.97598	-12.5715	15.9478
					2.98198	-12.6704	15.9754
					2.98799	-12.7694	16.0029
					2.99399	-12.8683	16.0304
					3	-12.9672	16.058

## Sheet: Fig.S4f
scatter point	social engagement score	distractor bias (ms)		fitted curve	social engagement score	distractor bias (ms)	errorbar
	-1	80.925			-3	89.4475	19.8607
	-1	63.675			-2.99399	89.3414	19.8249
	-1	84.6585			-2.98799	89.2352	19.7891
	-1	68.575			-2.98198	89.1291	19.7534
	-1	90.5179			-2.97598	89.023	19.7176
	-1	92.9167			-2.96997	88.9169	19.6818
	-1	110.061			-2.96396	88.8108	19.6461
	-1	111.81			-2.95796	88.7047	19.6104
	-1	104.833			-2.95195	88.5986	19.5746
	-1	68.0286			-2.94595	88.4925	19.5389
	-1	105.567			-2.93994	88.3863	19.5032
	-1	91.1944			-2.93393	88.2802	19.4675
	-1	111.705			-2.92793	88.1741	19.4318
	-1	77.6136			-2.92192	88.068	19.3961
	-1	90.8781			-2.91592	87.9619	19.3604
	-1	121.406			-2.90991	87.8558	19.3247
	-1	105.236			-2.9039	87.7497	19.2891
	-1	95.5366			-2.8979	87.6436	19.2534
	-1	103.968			-2.89189	87.5374	19.2177
	-1	128.256			-2.88589	87.4313	19.1821
	-1	97.65			-2.87988	87.3252	19.1465
	-1	104.8			-2.87387	87.2191	19.1108
	-1	95.2			-2.86787	87.113	19.0752
	-1	85.4865			-2.86186	87.0069	19.0396
	-1	44.0526			-2.85586	86.9008	19.004
	-1	24.2174			-2.84985	86.7947	18.9684
	-1	55.6047			-2.84384	86.6885	18.9328
	-1	53.0256			-2.83784	86.5824	18.8972
	-1	96.34			-2.83183	86.4763	18.8617
	-1	111.933			-2.82583	86.3702	18.8261
	-1	88.4706			-2.81982	86.2641	18.7905
	-1	104.538			-2.81381	86.158	18.755
	-1	108.125			-2.80781	86.0519	18.7194
	-1	53.0667			-2.8018	85.9457	18.6839
	-1	78.0952			-2.7958	85.8396	18.6484
	-1	74.4706			-2.78979	85.7335	18.6129
	1	35.037			-2.78378	85.6274	18.5774
	1	44.0351			-2.77778	85.5213	18.5419
	1	48.0702			-2.77177	85.4152	18.5064
	1	72.0303			-2.76577	85.3091	18.4709
	1	50.1231			-2.75976	85.2029	18.4354
	1	53.1892			-2.75375	85.0968	18.4
	1	70.4167			-2.74775	84.9907	18.3645
	1	68.3261			-2.74174	84.8846	18.3291
	1	53.8824			-2.73574	84.7785	18.2937
	1	60.8841			-2.72973	84.6724	18.2582
	1	47.3333			-2.72372	84.5663	18.2228
	1	28.8049			-2.71772	84.4601	18.1874
	1	56.9216			-2.71171	84.354	18.152
	1	56.3036			-2.70571	84.2479	18.1166
	1	47.4727			-2.6997	84.1418	18.0813
	1	70.8667			-2.69369	84.0357	18.0459
	1	68.7069			-2.68769	83.9296	18.0105
	1	44.3288			-2.68168	83.8235	17.9752
	1	42.9048			-2.67568	83.7174	17.9398
	1	43.96			-2.66967	83.6112	17.9045
	1	53.1343			-2.66366	83.5051	17.8692
	1	54.3235			-2.65766	83.399	17.8339
	1	34.4091			-2.65165	83.2929	17.7986
	1	45.4359			-2.64565	83.1868	17.7633
	1	41.8909			-2.63964	83.0807	17.728
	1	57.7627			-2.63363	82.9746	17.6928
	1	45.3396			-2.62763	82.8684	17.6575
	1	28.8438			-2.62162	82.7623	17.6222
	1	43.1884			-2.61562	82.6562	17.587
	1	72.5135			-2.60961	82.5501	17.5518
	1	51.1481			-2.6036	82.444	17.5166
	1	64.1633			-2.5976	82.3379	17.4814
	1	40.0735			-2.59159	82.2318	17.4462
	1	49.1714			-2.58559	82.1257	17.411
	1	26.9565			-2.57958	82.0195	17.3758
	1	30.413			-2.57357	81.9134	17.3406
	-1	49.7955			-2.56757	81.8073	17.3055
	-1	59.9811			-2.56156	81.7012	17.2703
	-1	15.8852			-2.55556	81.5951	17.2352
	-1	19.2308			-2.54955	81.489	17.2001
	-1	26.6508			-2.54354	81.3829	17.165
	-1	36.6441			-2.53754	81.2767	17.1299
	-1	33.6364			-2.53153	81.1706	17.0948
	-1	8.2439			-2.52553	81.0645	17.0597
	-1	51.38			-2.51952	80.9584	17.0246
	-1	48.7812			-2.51351	80.8523	16.9896
	-1	45.6458			-2.50751	80.7462	16.9545
	-1	28.4412			-2.5015	80.6401	16.9195
	-1	47.5122			-2.4955	80.534	16.8845
	-1	49.7143			-2.48949	80.4278	16.8495
	-1	15.1091			-2.48348	80.3217	16.8145
	-1	8.51064			-2.47748	80.2156	16.7795
	-1	14.1579			-2.47147	80.1095	16.7445
	-1	24.5769			-2.46547	80.0034	16.7096
	-1	4.6			-2.45946	79.8973	16.6746
	-1	42.1395			-2.45345	79.7912	16.6397
	-1	39.1731			-2.44745	79.685	16.6048
	-1	9.625			-2.44144	79.5789	16.5698
	-1	12.7755			-2.43544	79.4728	16.5349
	-1	6.1875			-2.42943	79.3667	16.5001
	-1	-17			-2.42342	79.2606	16.4652
	-1	11.4815			-2.41742	79.1545	16.4303
	-1	7.0339			-2.41141	79.0484	16.3955
	-1	-7.45652			-2.40541	78.9422	16.3606
	-1	8.03571			-2.3994	78.8361	16.3258
	-1	-3			-2.39339	78.73	16.291
	-1	8.75			-2.38739	78.6239	16.2562
	-1	-16.2			-2.38138	78.5178	16.2214
	-1	12.0833			-2.37538	78.4117	16.1866
	-1	5.4			-2.36937	78.3056	16.1519
	-1	-10.6304			-2.36336	78.1995	16.1171
	-1	16.7097			-2.35736	78.0933	16.0824
	1	-29.5476			-2.35135	77.9872	16.0477
	1	-19.5517			-2.34535	77.8811	16.013
	1	-5.83333			-2.33934	77.775	15.9783
	1	-12.3721			-2.33333	77.6689	15.9436
	1	-14.6557			-2.32733	77.5628	15.9089
	1	2.71429			-2.32132	77.4567	15.8743
	1	-5.98			-2.31532	77.3505	15.8397
	1	-15.383			-2.30931	77.2444	15.805
	1	6.45098			-2.3033	77.1383	15.7704
	1	-8.8125			-2.2973	77.0322	15.7358
	1	16.5345			-2.29129	76.9261	15.7013
	1	0.823529			-2.28529	76.82	15.6667
	1	-51.125			-2.27928	76.7139	15.6321
	1	-53.8868			-2.27327	76.6077	15.5976
	1	-39.7907			-2.26727	76.5016	15.5631
	1	-29.5849			-2.26126	76.3955	15.5286
	1	-17.3393			-2.25526	76.2894	15.4941
	1	-13.7077			-2.24925	76.1833	15.4596
	1	-0.829787			-2.24324	76.0772	15.4252
	1	-12.0926			-2.23724	75.9711	15.3907
	1	6.94444			-2.23123	75.865	15.3563
	1	-3			-2.22523	75.7588	15.3219
	1	18.5246			-2.21922	75.6527	15.2875
	1	16.0851			-2.21321	75.5466	15.2531
	1	-51.1304			-2.20721	75.4405	15.2187
	1	-31.0484			-2.2012	75.3344	15.1844
	1	-20.9512			-2.1952	75.2283	15.15
	1	-14.4694			-2.18919	75.1222	15.1157
	1	-1.73913			-2.18318	75.0161	15.0814
	1	-11.1			-2.17718	74.9099	15.0471
	1	4.64815			-2.17117	74.8038	15.0129
	1	-24.2807			-2.16517	74.6977	14.9786
	1	-20.14			-2.15916	74.5916	14.9444
	1	-27.1143			-2.15315	74.4855	14.9102
	1	4.11667			-2.14715	74.3794	14.8759
	1	8.125			-2.14114	74.2733	14.8418
					-2.13514	74.1671	14.8076
					-2.12913	74.061	14.7734
					-2.12312	73.9549	14.7393
					-2.11712	73.8488	14.7052
					-2.11111	73.7427	14.6711
					-2.10511	73.6366	14.637
					-2.0991	73.5305	14.603
					-2.09309	73.4244	14.5689
					-2.08709	73.3182	14.5349
					-2.08108	73.2121	14.5009
					-2.07508	73.106	14.4669
					-2.06907	72.9999	14.4329
					-2.06306	72.8938	14.399
					-2.05706	72.7877	14.365
					-2.05105	72.6816	14.3311
					-2.04505	72.5754	14.2972
					-2.03904	72.4693	14.2633
					-2.03303	72.3632	14.2295
					-2.02703	72.2571	14.1956
					-2.02102	72.151	14.1618
					-2.01502	72.0449	14.128
					-2.00901	71.9388	14.0942
					-2.003	71.8327	14.0605
					-1.997	71.7265	14.0267
					-1.99099	71.6204	13.993
					-1.98498	71.5143	13.9593
					-1.97898	71.4082	13.9257
					-1.97297	71.3021	13.892
					-1.96697	71.196	13.8584
					-1.96096	71.0898	13.8248
					-1.95495	70.9837	13.7912
					-1.94895	70.8776	13.7576
					-1.94294	70.7715	13.724
					-1.93694	70.6654	13.6905
					-1.93093	70.5593	13.657
					-1.92492	70.4532	13.6235
					-1.91892	70.3471	13.5901
					-1.91291	70.2409	13.5566
					-1.90691	70.1348	13.5232
					-1.9009	70.0287	13.4898
					-1.89489	69.9226	13.4564
					-1.88889	69.8165	13.4231
					-1.88288	69.7104	13.3898
					-1.87688	69.6043	13.3565
					-1.87087	69.4981	13.3232
					-1.86486	69.392	13.2899
					-1.85886	69.2859	13.2567
					-1.85285	69.1798	13.2235
					-1.84685	69.0737	13.1903
					-1.84084	68.9676	13.1571
					-1.83483	68.8615	13.124
					-1.82883	68.7554	13.0909
					-1.82282	68.6492	13.0578
					-1.81682	68.5431	13.0248
					-1.81081	68.437	12.9917
					-1.8048	68.3309	12.9587
					-1.7988	68.2248	12.9257
					-1.79279	68.1187	12.8928
					-1.78679	68.0126	12.8599
					-1.78078	67.9065	12.827
					-1.77477	67.8003	12.7941
					-1.76877	67.6942	12.7612
					-1.76276	67.5881	12.7284
					-1.75676	67.482	12.6956
					-1.75075	67.3759	12.6628
					-1.74474	67.2698	12.6301
					-1.73874	67.1637	12.5974
					-1.73273	67.0575	12.5647
					-1.72673	66.9514	12.532
					-1.72072	66.8453	12.4994
					-1.71471	66.7392	12.4668
					-1.70871	66.6331	12.4342
					-1.7027	66.527	12.4017
					-1.6967	66.4209	12.3692
					-1.69069	66.3147	12.3367
					-1.68468	66.2086	12.3043
					-1.67868	66.1025	12.2718
					-1.67267	65.9964	12.2394
					-1.66667	65.8903	12.2071
					-1.66066	65.7842	12.1748
					-1.65465	65.6781	12.1425
					-1.64865	65.572	12.1102
					-1.64264	65.4658	12.078
					-1.63664	65.3597	12.0458
					-1.63063	65.2536	12.0136
					-1.62462	65.1475	11.9814
					-1.61862	65.0414	11.9493
					-1.61261	64.9353	11.9173
					-1.60661	64.8292	11.8852
					-1.6006	64.723	11.8532
					-1.59459	64.6169	11.8212
					-1.58859	64.5108	11.7893
					-1.58258	64.4047	11.7574
					-1.57658	64.2986	11.7255
					-1.57057	64.1925	11.6937
					-1.56456	64.0864	11.6619
					-1.55856	63.9802	11.6301
					-1.55255	63.8741	11.5984
					-1.54655	63.768	11.5667
					-1.54054	63.6619	11.535
					-1.53453	63.5558	11.5034
					-1.52853	63.4497	11.4718
					-1.52252	63.3436	11.4403
					-1.51652	63.2375	11.4088
					-1.51051	63.1313	11.3773
					-1.5045	63.0252	11.3459
					-1.4985	62.9191	11.3145
					-1.49249	62.813	11.2831
					-1.48649	62.7069	11.2518
					-1.48048	62.6008	11.2205
					-1.47447	62.4947	11.1893
					-1.46847	62.3886	11.1581
					-1.46246	62.2824	11.1269
					-1.45646	62.1763	11.0958
					-1.45045	62.0702	11.0647
					-1.44444	61.9641	11.0337
					-1.43844	61.858	11.0027
					-1.43243	61.7519	10.9718
					-1.42643	61.6458	10.9409
					-1.42042	61.5396	10.91
					-1.41441	61.4335	10.8792
					-1.40841	61.3274	10.8484
					-1.4024	61.2213	10.8177
					-1.3964	61.1152	10.787
					-1.39039	61.0091	10.7563
					-1.38438	60.903	10.7257
					-1.37838	60.7968	10.6952
					-1.37237	60.6907	10.6647
					-1.36637	60.5846	10.6342
					-1.36036	60.4785	10.6038
					-1.35435	60.3724	10.5734
					-1.34835	60.2663	10.5431
					-1.34234	60.1602	10.5128
					-1.33634	60.054	10.4826
					-1.33033	59.9479	10.4524
					-1.32432	59.8418	10.4223
					-1.31832	59.7357	10.3922
					-1.31231	59.6296	10.3622
					-1.30631	59.5235	10.3322
					-1.3003	59.4174	10.3023
					-1.29429	59.3113	10.2724
					-1.28829	59.2051	10.2426
					-1.28228	59.099	10.2128
					-1.27628	58.9929	10.1831
					-1.27027	58.8868	10.1534
					-1.26426	58.7807	10.1238
					-1.25826	58.6746	10.0943
					-1.25225	58.5685	10.0647
					-1.24625	58.4624	10.0353
					-1.24024	58.3562	10.0059
					-1.23423	58.2501	9.97657
					-1.22823	58.144	9.94729
					-1.22222	58.0379	9.91807
					-1.21622	57.9318	9.8889
					-1.21021	57.8257	9.8598
					-1.2042	57.7196	9.83075
					-1.1982	57.6134	9.80176
					-1.19219	57.5073	9.77283
					-1.18619	57.4012	9.74396
					-1.18018	57.2951	9.71515
					-1.17417	57.189	9.6864
					-1.16817	57.0829	9.65771
					-1.16216	56.9768	9.62909
					-1.15616	56.8706	9.60053
					-1.15015	56.7645	9.57203
					-1.14414	56.6584	9.5436
					-1.13814	56.5523	9.51523
					-1.13213	56.4462	9.48692
					-1.12613	56.3401	9.45869
					-1.12012	56.234	9.43051
					-1.11411	56.1279	9.40241
					-1.10811	56.0217	9.37437
					-1.1021	55.9156	9.3464
					-1.0961	55.8095	9.3185
					-1.09009	55.7034	9.29067
					-1.08408	55.5973	9.26291
					-1.07808	55.4912	9.23522
					-1.07207	55.3851	9.2076
					-1.06607	55.2789	9.18005
					-1.06006	55.1728	9.15258
					-1.05405	55.0667	9.12517
					-1.04805	54.9606	9.09785
					-1.04204	54.8545	9.07059
					-1.03604	54.7484	9.04341
					-1.03003	54.6423	9.01631
					-1.02402	54.5361	8.98929
					-1.01802	54.43	8.96234
					-1.01201	54.3239	8.93547
					-1.00601	54.2178	8.90868
					-1	54.1117	8.88196
					-0.993994	54.0056	8.85533
					-0.987988	53.8995	8.82878
					-0.981982	53.7934	8.80231
					-0.975976	53.6872	8.77592
					-0.96997	53.5811	8.74962
					-0.963964	53.475	8.7234
					-0.957958	53.3689	8.69726
					-0.951952	53.2628	8.67121
					-0.945946	53.1567	8.64524
					-0.93994	53.0506	8.61937
					-0.933934	52.9445	8.59357
					-0.927928	52.8383	8.56787
					-0.921922	52.7322	8.54226
					-0.915916	52.6261	8.51674
					-0.90991	52.52	8.49131
					-0.903904	52.4139	8.46597
					-0.897898	52.3078	8.44072
					-0.891892	52.2017	8.41556
					-0.885886	52.0955	8.3905
					-0.87988	51.9894	8.36554
					-0.873874	51.8833	8.34067
					-0.867868	51.7772	8.31589
					-0.861862	51.6711	8.29122
					-0.855856	51.565	8.26664
					-0.84985	51.4589	8.24217
					-0.843844	51.3528	8.21779
					-0.837838	51.2466	8.19351
					-0.831832	51.1405	8.16934
					-0.825826	51.0344	8.14527
					-0.81982	50.9283	8.1213
					-0.813814	50.8222	8.09744
					-0.807808	50.7161	8.07368
					-0.801802	50.61	8.05003
					-0.795796	50.5038	8.02649
					-0.78979	50.3977	8.00306
					-0.783784	50.2916	7.97973
					-0.777778	50.1855	7.95652
					-0.771772	50.0794	7.93342
					-0.765766	49.9733	7.91043
					-0.75976	49.8672	7.88755
					-0.753754	49.761	7.86479
					-0.747748	49.6549	7.84214
					-0.741742	49.5488	7.81961
					-0.735736	49.4427	7.7972
					-0.72973	49.3366	7.7749
					-0.723724	49.2305	7.75273
					-0.717718	49.1244	7.73067
					-0.711712	49.0183	7.70874
					-0.705706	48.9121	7.68693
					-0.6997	48.806	7.66524
					-0.693694	48.6999	7.64368
					-0.687688	48.5938	7.62224
					-0.681682	48.4877	7.60093
					-0.675676	48.3816	7.57975
					-0.66967	48.2755	7.5587
					-0.663664	48.1693	7.53777
					-0.657658	48.0632	7.51698
					-0.651652	47.9571	7.49632
					-0.645646	47.851	7.47579
					-0.63964	47.7449	7.4554
					-0.633634	47.6388	7.43514
					-0.627628	47.5327	7.41502
					-0.621622	47.4265	7.39504
					-0.615616	47.3204	7.37519
					-0.60961	47.2143	7.35549
					-0.603604	47.1082	7.33592
					-0.597598	47.0021	7.3165
					-0.591592	46.896	7.29722
					-0.585586	46.7899	7.27809
					-0.57958	46.6838	7.2591
					-0.573574	46.5776	7.24026
					-0.567568	46.4715	7.22157
					-0.561562	46.3654	7.20302
					-0.555556	46.2593	7.18463
					-0.54955	46.1532	7.16639
					-0.543543	46.0471	7.1483
					-0.537538	45.941	7.13036
					-0.531532	45.8348	7.11258
					-0.525525	45.7287	7.09495
					-0.51952	45.6226	7.07748
					-0.513513	45.5165	7.06017
					-0.507508	45.4104	7.04302
					-0.501502	45.3043	7.02603
					-0.495495	45.1982	7.0092
					-0.48949	45.0921	6.99254
					-0.483484	44.9859	6.97603
					-0.477477	44.8798	6.9597
					-0.471471	44.7737	6.94353
					-0.465465	44.6676	6.92753
					-0.459459	44.5615	6.91169
					-0.453453	44.4554	6.89603
					-0.447447	44.3493	6.88054
					-0.441441	44.2431	6.86522
					-0.435435	44.137	6.85007
					-0.429429	44.0309	6.8351
					-0.423423	43.9248	6.82031
					-0.417417	43.8187	6.80569
					-0.411411	43.7126	6.79124
					-0.405405	43.6065	6.77698
					-0.399399	43.5003	6.7629
					-0.393393	43.3942	6.749
					-0.387387	43.2881	6.73528
					-0.381381	43.182	6.72175
					-0.375375	43.0759	6.7084
					-0.369369	42.9698	6.69524
					-0.363363	42.8637	6.68226
					-0.357357	42.7576	6.66947
					-0.351351	42.6514	6.65687
					-0.345345	42.5453	6.64447
					-0.339339	42.4392	6.63225
					-0.333333	42.3331	6.62022
					-0.327327	42.227	6.60839
					-0.321321	42.1209	6.59676
					-0.315315	42.0148	6.58531
					-0.309309	41.9087	6.57407
					-0.303303	41.8025	6.56302
					-0.297297	41.6964	6.55217
					-0.291291	41.5903	6.54152
					-0.285285	41.4842	6.53108
					-0.279279	41.3781	6.52083
					-0.273273	41.272	6.51078
					-0.267267	41.1659	6.50094
					-0.261261	41.0597	6.4913
					-0.255255	40.9536	6.48187
					-0.249249	40.8475	6.47265
					-0.243243	40.7414	6.46363
					-0.237237	40.6353	6.45481
					-0.231231	40.5292	6.44621
					-0.225225	40.4231	6.43782
					-0.219219	40.3169	6.42964
					-0.213213	40.2108	6.42166
					-0.207207	40.1047	6.4139
					-0.201201	39.9986	6.40636
					-0.195195	39.8925	6.39902
					-0.189189	39.7864	6.39191
					-0.183183	39.6803	6.385
					-0.177177	39.5742	6.37831
					-0.171171	39.468	6.37184
					-0.165165	39.3619	6.36558
					-0.159159	39.2558	6.35955
					-0.153153	39.1497	6.35373
					-0.147147	39.0436	6.34813
					-0.141141	38.9375	6.34274
					-0.135135	38.8314	6.33758
					-0.129129	38.7252	6.33264
					-0.123123	38.6191	6.32792
					-0.117117	38.513	6.32342
					-0.111111	38.4069	6.31915
					-0.105105	38.3008	6.31509
					-0.0990991	38.1947	6.31126
					-0.0930931	38.0886	6.30765
					-0.0870871	37.9825	6.30427
					-0.0810811	37.8763	6.30111
					-0.0750751	37.7702	6.29817
					-0.0690691	37.6641	6.29546
					-0.0630631	37.558	6.29297
					-0.0570571	37.4519	6.29071
					-0.0510511	37.3458	6.28867
					-0.045045	37.2397	6.28686
					-0.039039	37.1335	6.28528
					-0.033033	37.0274	6.28392
					-0.027027	36.9213	6.28279
					-0.021021	36.8152	6.28188
					-0.015015	36.7091	6.2812
					-0.00900901	36.603	6.28075
					-0.003003	36.4969	6.28052
					0.003003	36.3907	6.28052
					0.00900901	36.2846	6.28075
					0.015015	36.1785	6.2812
					0.021021	36.0724	6.28188
					0.027027	35.9663	6.28279
					0.033033	35.8602	6.28392
					0.039039	35.7541	6.28528
					0.045045	35.648	6.28686
					0.0510511	35.5418	6.28867
					0.0570571	35.4357	6.29071
					0.0630631	35.3296	6.29297
					0.0690691	35.2235	6.29546
					0.0750751	35.1174	6.29817
					0.0810811	35.0113	6.30111
					0.0870871	34.9052	6.30427
					0.0930931	34.7991	6.30765
					0.0990991	34.6929	6.31126
					0.105105	34.5868	6.31509
					0.111111	34.4807	6.31915
					0.117117	34.3746	6.32342
					0.123123	34.2685	6.32792
					0.129129	34.1624	6.33264
					0.135135	34.0562	6.33758
					0.141141	33.9501	6.34274
					0.147147	33.844	6.34813
					0.153153	33.7379	6.35373
					0.159159	33.6318	6.35955
					0.165165	33.5257	6.36558
					0.171171	33.4196	6.37184
					0.177177	33.3135	6.37831
					0.183183	33.2073	6.385
					0.189189	33.1012	6.39191
					0.195195	32.9951	6.39902
					0.201201	32.889	6.40636
					0.207207	32.7829	6.4139
					0.213213	32.6768	6.42166
					0.219219	32.5707	6.42964
					0.225225	32.4646	6.43782
					0.231231	32.3584	6.44621
					0.237237	32.2523	6.45481
					0.243243	32.1462	6.46363
					0.249249	32.0401	6.47265
					0.255255	31.934	6.48187
					0.261261	31.8279	6.4913
					0.267267	31.7218	6.50094
					0.273273	31.6156	6.51078
					0.279279	31.5095	6.52083
					0.285285	31.4034	6.53108
					0.291291	31.2973	6.54152
					0.297297	31.1912	6.55217
					0.303303	31.0851	6.56302
					0.309309	30.979	6.57407
					0.315315	30.8728	6.58531
					0.321321	30.7667	6.59676
					0.327327	30.6606	6.60839
					0.333333	30.5545	6.62022
					0.339339	30.4484	6.63225
					0.345345	30.3423	6.64447
					0.351351	30.2362	6.65687
					0.357357	30.1301	6.66947
					0.363363	30.0239	6.68226
					0.369369	29.9178	6.69524
					0.375375	29.8117	6.7084
					0.381381	29.7056	6.72175
					0.387387	29.5995	6.73528
					0.393393	29.4934	6.749
					0.399399	29.3873	6.7629
					0.405405	29.2811	6.77698
					0.411411	29.175	6.79124
					0.417417	29.0689	6.80569
					0.423423	28.9628	6.82031
					0.429429	28.8567	6.8351
					0.435435	28.7506	6.85007
					0.441441	28.6445	6.86522
					0.447447	28.5384	6.88054
					0.453453	28.4322	6.89603
					0.459459	28.3261	6.91169
					0.465465	28.22	6.92753
					0.471471	28.1139	6.94353
					0.477477	28.0078	6.9597
					0.483484	27.9017	6.97603
					0.48949	27.7956	6.99254
					0.495495	27.6894	7.0092
					0.501502	27.5833	7.02603
					0.507508	27.4772	7.04302
					0.513513	27.3711	7.06017
					0.51952	27.265	7.07748
					0.525525	27.1589	7.09495
					0.531532	27.0528	7.11258
					0.537538	26.9467	7.13036
					0.543543	26.8405	7.1483
					0.54955	26.7344	7.16639
					0.555556	26.6283	7.18463
					0.561562	26.5222	7.20302
					0.567568	26.4161	7.22157
					0.573574	26.31	7.24026
					0.57958	26.2039	7.2591
					0.585586	26.0977	7.27809
					0.591592	25.9916	7.29722
					0.597598	25.8855	7.3165
					0.603604	25.7794	7.33592
					0.60961	25.6733	7.35549
					0.615616	25.5672	7.37519
					0.621622	25.4611	7.39504
					0.627628	25.3549	7.41502
					0.633634	25.2488	7.43514
					0.63964	25.1427	7.4554
					0.645646	25.0366	7.47579
					0.651652	24.9305	7.49632
					0.657658	24.8244	7.51698
					0.663664	24.7183	7.53777
					0.66967	24.6122	7.5587
					0.675676	24.506	7.57975
					0.681682	24.3999	7.60093
					0.687688	24.2938	7.62224
					0.693694	24.1877	7.64368
					0.6997	24.0816	7.66524
					0.705706	23.9755	7.68693
					0.711712	23.8694	7.70874
					0.717718	23.7632	7.73067
					0.723724	23.6571	7.75273
					0.72973	23.551	7.7749
					0.735736	23.4449	7.7972
					0.741742	23.3388	7.81961
					0.747748	23.2327	7.84214
					0.753754	23.1266	7.86479
					0.75976	23.0205	7.88755
					0.765766	22.9143	7.91043
					0.771772	22.8082	7.93342
					0.777778	22.7021	7.95652
					0.783784	22.596	7.97973
					0.78979	22.4899	8.00306
					0.795796	22.3838	8.02649
					0.801802	22.2777	8.05003
					0.807808	22.1715	8.07368
					0.813814	22.0654	8.09744
					0.81982	21.9593	8.1213
					0.825826	21.8532	8.14527
					0.831832	21.7471	8.16934
					0.837838	21.641	8.19351
					0.843844	21.5349	8.21779
					0.84985	21.4288	8.24217
					0.855856	21.3226	8.26664
					0.861862	21.2165	8.29122
					0.867868	21.1104	8.31589
					0.873874	21.0043	8.34067
					0.87988	20.8982	8.36554
					0.885886	20.7921	8.3905
					0.891892	20.686	8.41556
					0.897898	20.5798	8.44072
					0.903904	20.4737	8.46597
					0.90991	20.3676	8.49131
					0.915916	20.2615	8.51674
					0.921922	20.1554	8.54226
					0.927928	20.0493	8.56787
					0.933934	19.9432	8.59357
					0.93994	19.8371	8.61937
					0.945946	19.7309	8.64524
					0.951952	19.6248	8.67121
					0.957958	19.5187	8.69726
					0.963964	19.4126	8.7234
					0.96997	19.3065	8.74962
					0.975976	19.2004	8.77592
					0.981982	19.0943	8.80231
					0.987988	18.9881	8.82878
					0.993994	18.882	8.85533
					1	18.7759	8.88196
					1.00601	18.6698	8.90868
					1.01201	18.5637	8.93547
					1.01802	18.4576	8.96234
					1.02402	18.3515	8.98929
					1.03003	18.2453	9.01631
					1.03604	18.1392	9.04341
					1.04204	18.0331	9.07059
					1.04805	17.927	9.09785
					1.05405	17.8209	9.12517
					1.06006	17.7148	9.15258
					1.06607	17.6087	9.18005
					1.07207	17.5026	9.2076
					1.07808	17.3964	9.23522
					1.08408	17.2903	9.26291
					1.09009	17.1842	9.29067
					1.0961	17.0781	9.3185
					1.1021	16.972	9.3464
					1.10811	16.8659	9.37437
					1.11411	16.7598	9.40241
					1.12012	16.6536	9.43051
					1.12613	16.5475	9.45869
					1.13213	16.4414	9.48692
					1.13814	16.3353	9.51523
					1.14414	16.2292	9.5436
					1.15015	16.1231	9.57203
					1.15616	16.017	9.60053
					1.16216	15.9109	9.62909
					1.16817	15.8047	9.65771
					1.17417	15.6986	9.6864
					1.18018	15.5925	9.71515
					1.18619	15.4864	9.74396
					1.19219	15.3803	9.77283
					1.1982	15.2742	9.80176
					1.2042	15.1681	9.83075
					1.21021	15.0619	9.8598
					1.21622	14.9558	9.8889
					1.22222	14.8497	9.91807
					1.22823	14.7436	9.94729
					1.23423	14.6375	9.97657
					1.24024	14.5314	10.0059
					1.24625	14.4253	10.0353
					1.25225	14.3191	10.0647
					1.25826	14.213	10.0943
					1.26426	14.1069	10.1238
					1.27027	14.0008	10.1534
					1.27628	13.8947	10.1831
					1.28228	13.7886	10.2128
					1.28829	13.6825	10.2426
					1.29429	13.5764	10.2724
					1.3003	13.4702	10.3023
					1.30631	13.3641	10.3322
					1.31231	13.258	10.3622
					1.31832	13.1519	10.3922
					1.32432	13.0458	10.4223
					1.33033	12.9397	10.4524
					1.33634	12.8336	10.4826
					1.34234	12.7274	10.5128
					1.34835	12.6213	10.5431
					1.35435	12.5152	10.5734
					1.36036	12.4091	10.6038
					1.36637	12.303	10.6342
					1.37237	12.1969	10.6647
					1.37838	12.0908	10.6952
					1.38438	11.9847	10.7257
					1.39039	11.8785	10.7563
					1.3964	11.7724	10.787
					1.4024	11.6663	10.8177
					1.40841	11.5602	10.8484
					1.41441	11.4541	10.8792
					1.42042	11.348	10.91
					1.42643	11.2419	10.9409
					1.43243	11.1357	10.9718
					1.43844	11.0296	11.0027
					1.44444	10.9235	11.0337
					1.45045	10.8174	11.0647
					1.45646	10.7113	11.0958
					1.46246	10.6052	11.1269
					1.46847	10.4991	11.1581
					1.47447	10.393	11.1893
					1.48048	10.2868	11.2205
					1.48649	10.1807	11.2518
					1.49249	10.0746	11.2831
					1.4985	9.9685	11.3145
					1.5045	9.86238	11.3459
					1.51051	9.75627	11.3773
					1.51652	9.65016	11.4088
					1.52252	9.54404	11.4403
					1.52853	9.43793	11.4718
					1.53453	9.33182	11.5034
					1.54054	9.2257	11.535
					1.54655	9.11959	11.5667
					1.55255	9.01348	11.5984
					1.55856	8.90736	11.6301
					1.56456	8.80125	11.6619
					1.57057	8.69514	11.6937
					1.57658	8.58902	11.7255
					1.58258	8.48291	11.7574
					1.58859	8.37679	11.7893
					1.59459	8.27068	11.8212
					1.6006	8.16457	11.8532
					1.60661	8.05845	11.8852
					1.61261	7.95234	11.9173
					1.61862	7.84623	11.9493
					1.62462	7.74011	11.9814
					1.63063	7.634	12.0136
					1.63664	7.52789	12.0458
					1.64264	7.42177	12.078
					1.64865	7.31566	12.1102
					1.65465	7.20955	12.1425
					1.66066	7.10343	12.1748
					1.66667	6.99732	12.2071
					1.67267	6.89121	12.2394
					1.67868	6.78509	12.2718
					1.68468	6.67898	12.3043
					1.69069	6.57287	12.3367
					1.6967	6.46675	12.3692
					1.7027	6.36064	12.4017
					1.70871	6.25453	12.4342
					1.71471	6.14841	12.4668
					1.72072	6.0423	12.4994
					1.72673	5.93619	12.532
					1.73273	5.83007	12.5647
					1.73874	5.72396	12.5974
					1.74474	5.61784	12.6301
					1.75075	5.51173	12.6628
					1.75676	5.40562	12.6956
					1.76276	5.2995	12.7284
					1.76877	5.19339	12.7612
					1.77477	5.08728	12.7941
					1.78078	4.98116	12.827
					1.78679	4.87505	12.8599
					1.79279	4.76894	12.8928
					1.7988	4.66282	12.9257
					1.8048	4.55671	12.9587
					1.81081	4.4506	12.9917
					1.81682	4.34448	13.0248
					1.82282	4.23837	13.0578
					1.82883	4.13226	13.0909
					1.83483	4.02614	13.124
					1.84084	3.92003	13.1571
					1.84685	3.81392	13.1903
					1.85285	3.7078	13.2235
					1.85886	3.60169	13.2567
					1.86486	3.49558	13.2899
					1.87087	3.38946	13.3232
					1.87688	3.28335	13.3565
					1.88288	3.17724	13.3898
					1.88889	3.07112	13.4231
					1.89489	2.96501	13.4564
					1.9009	2.85889	13.4898
					1.90691	2.75278	13.5232
					1.91291	2.64667	13.5566
					1.91892	2.54055	13.5901
					1.92492	2.43444	13.6235
					1.93093	2.32833	13.657
					1.93694	2.22221	13.6905
					1.94294	2.1161	13.724
					1.94895	2.00999	13.7576
					1.95495	1.90387	13.7912
					1.96096	1.79776	13.8248
					1.96697	1.69165	13.8584
					1.97297	1.58553	13.892
					1.97898	1.47942	13.9257
					1.98498	1.37331	13.9593
					1.99099	1.26719	13.993
					1.997	1.16108	14.0267
					2.003	1.05497	14.0605
					2.00901	0.948853	14.0942
					2.01502	0.842739	14.128
					2.02102	0.736626	14.1618
					2.02703	0.630512	14.1956
					2.03303	0.524399	14.2295
					2.03904	0.418285	14.2633
					2.04505	0.312172	14.2972
					2.05105	0.206058	14.3311
					2.05706	0.099945	14.365
					2.06306	-0.00616851	14.399
					2.06907	-0.112282	14.4329
					2.07508	-0.218395	14.4669
					2.08108	-0.324509	14.5009
					2.08709	-0.430622	14.5349
					2.09309	-0.536736	14.5689
					2.0991	-0.642849	14.603
					2.10511	-0.748963	14.637
					2.11111	-0.855076	14.6711
					2.11712	-0.96119	14.7052
					2.12312	-1.0673	14.7393
					2.12913	-1.17342	14.7734
					2.13514	-1.27953	14.8076
					2.14114	-1.38564	14.8418
					2.14715	-1.49176	14.8759
					2.15315	-1.59787	14.9102
					2.15916	-1.70398	14.9444
					2.16517	-1.8101	14.9786
					2.17117	-1.91621	15.0129
					2.17718	-2.02232	15.0471
					2.18318	-2.12844	15.0814
					2.18919	-2.23455	15.1157
					2.1952	-2.34066	15.15
					2.2012	-2.44678	15.1844
					2.20721	-2.55289	15.2187
					2.21321	-2.65901	15.2531
					2.21922	-2.76512	15.2875
					2.22523	-2.87123	15.3219
					2.23123	-2.97735	15.3563
					2.23724	-3.08346	15.3907
					2.24324	-3.18957	15.4252
					2.24925	-3.29569	15.4596
					2.25526	-3.4018	15.4941
					2.26126	-3.50791	15.5286
					2.26727	-3.61403	15.5631
					2.27327	-3.72014	15.5976
					2.27928	-3.82625	15.6321
					2.28529	-3.93237	15.6667
					2.29129	-4.03848	15.7013
					2.2973	-4.14459	15.7358
					2.3033	-4.25071	15.7704
					2.30931	-4.35682	15.805
					2.31532	-4.46293	15.8397
					2.32132	-4.56905	15.8743
					2.32733	-4.67516	15.9089
					2.33333	-4.78127	15.9436
					2.33934	-4.88739	15.9783
					2.34535	-4.9935	16.013
					2.35135	-5.09961	16.0477
					2.35736	-5.20573	16.0824
					2.36336	-5.31184	16.1171
					2.36937	-5.41796	16.1519
					2.37538	-5.52407	16.1866
					2.38138	-5.63018	16.2214
					2.38739	-5.7363	16.2562
					2.39339	-5.84241	16.291
					2.3994	-5.94852	16.3258
					2.40541	-6.05464	16.3606
					2.41141	-6.16075	16.3955
					2.41742	-6.26686	16.4303
					2.42342	-6.37298	16.4652
					2.42943	-6.47909	16.5001
					2.43544	-6.5852	16.5349
					2.44144	-6.69132	16.5698
					2.44745	-6.79743	16.6048
					2.45345	-6.90354	16.6397
					2.45946	-7.00966	16.6746
					2.46547	-7.11577	16.7096
					2.47147	-7.22188	16.7445
					2.47748	-7.328	16.7795
					2.48348	-7.43411	16.8145
					2.48949	-7.54022	16.8495
					2.4955	-7.64634	16.8845
					2.5015	-7.75245	16.9195
					2.50751	-7.85856	16.9545
					2.51351	-7.96468	16.9896
					2.51952	-8.07079	17.0246
					2.52553	-8.17691	17.0597
					2.53153	-8.28302	17.0948
					2.53754	-8.38913	17.1299
					2.54354	-8.49525	17.165
					2.54955	-8.60136	17.2001
					2.55556	-8.70747	17.2352
					2.56156	-8.81359	17.2703
					2.56757	-8.9197	17.3055
					2.57357	-9.02581	17.3406
					2.57958	-9.13193	17.3758
					2.58559	-9.23804	17.411
					2.59159	-9.34415	17.4462
					2.5976	-9.45027	17.4814
					2.6036	-9.55638	17.5166
					2.60961	-9.66249	17.5518
					2.61562	-9.76861	17.587
					2.62162	-9.87472	17.6222
					2.62763	-9.98083	17.6575
					2.63363	-10.0869	17.6928
					2.63964	-10.1931	17.728
					2.64565	-10.2992	17.7633
					2.65165	-10.4053	17.7986
					2.65766	-10.5114	17.8339
					2.66366	-10.6175	17.8692
					2.66967	-10.7236	17.9045
					2.67568	-10.8297	17.9398
					2.68168	-10.9359	17.9752
					2.68769	-11.042	18.0105
					2.69369	-11.1481	18.0459
					2.6997	-11.2542	18.0813
					2.70571	-11.3603	18.1166
					2.71171	-11.4664	18.152
					2.71772	-11.5725	18.1874
					2.72372	-11.6786	18.2228
					2.72973	-11.7848	18.2582
					2.73574	-11.8909	18.2937
					2.74174	-11.997	18.3291
					2.74775	-12.1031	18.3645
					2.75375	-12.2092	18.4
					2.75976	-12.3153	18.4354
					2.76577	-12.4214	18.4709
					2.77177	-12.5276	18.5064
					2.77778	-12.6337	18.5419
					2.78378	-12.7398	18.5774
					2.78979	-12.8459	18.6129
					2.7958	-12.952	18.6484
					2.8018	-13.0581	18.6839
					2.80781	-13.1642	18.7194
					2.81381	-13.2704	18.755
					2.81982	-13.3765	18.7905
					2.82583	-13.4826	18.8261
					2.83183	-13.5887	18.8617
					2.83784	-13.6948	18.8972
					2.84384	-13.8009	18.9328
					2.84985	-13.907	18.9684
					2.85586	-14.0131	19.004
					2.86186	-14.1193	19.0396
					2.86787	-14.2254	19.0752
					2.87387	-14.3315	19.1108
					2.87988	-14.4376	19.1465
					2.88589	-14.5437	19.1821
					2.89189	-14.6498	19.2177
					2.8979	-14.7559	19.2534
					2.9039	-14.8621	19.2891
					2.90991	-14.9682	19.3247
					2.91592	-15.0743	19.3604
					2.92192	-15.1804	19.3961
					2.92793	-15.2865	19.4318
					2.93393	-15.3926	19.4675
					2.93994	-15.4987	19.5032
					2.94595	-15.6048	19.5389
					2.95195	-15.711	19.5746
					2.95796	-15.8171	19.6104
					2.96396	-15.9232	19.6461
					2.96997	-16.0293	19.6818
					2.97598	-16.1354	19.7176
					2.98198	-16.2415	19.7534
					2.98799	-16.3476	19.7891
					2.99399	-16.4538	19.8249
					3	-16.5599	19.8607

## Sheet: Fig.S4g
scatter point	individual engagement score	distractor bias (ms)		fitted curve	individual engagement score	distractor bias (ms)	errorbar
	0	33.6429			-1.5	-19.4982	9.16685
	0	11.95			-1.497	-19.4098	9.15346
	0	49.6591			-1.49399	-19.3213	9.14008
	0	38.2619			-1.49099	-19.2328	9.1267
	0	69.1346			-1.48799	-19.1444	9.11334
	0	79.4444			-1.48498	-19.0559	9.09998
	0	86.8333			-1.48198	-18.9674	9.08663
	0	86.6889			-1.47898	-18.879	9.07328
	0	85.9565			-1.47598	-18.7905	9.05995
	0	79.7241			-1.47297	-18.7021	9.04662
	0	81.1739			-1.46997	-18.6136	9.0333
	0	78.9688			-1.46697	-18.5251	9.01998
	1	64.7143			-1.46396	-18.4367	9.00667
	1	45.5714			-1.46096	-18.3482	8.99338
	1	57.1316			-1.45796	-18.2598	8.98008
	1	64.4571			-1.45495	-18.1713	8.9668
	1	70.5			-1.45195	-18.0828	8.95353
	1	97.5532			-1.44895	-17.9944	8.94026
	1	77.0286			-1.44595	-17.9059	8.927
	1	94.5641			-1.44294	-17.8174	8.91374
	1	85.0816			-1.43994	-17.729	8.9005
	1	86.5333			-1.43694	-17.6405	8.88726
	1	109.727			-1.43393	-17.5521	8.87403
	1	76.375			-1.43093	-17.4636	8.86081
	1	40.4103			-1.42793	-17.3751	8.8476
	1	26.2453			-1.42492	-17.2867	8.8344
	1	62.8235			-1.42192	-17.1982	8.8212
	1	71.4865			-1.41892	-17.1098	8.80801
	1	64.4364			-1.41592	-17.0213	8.79483
	1	85.5833			-1.41291	-16.9328	8.78166
	1	62.3421			-1.40991	-16.8444	8.7685
	1	89			-1.40691	-16.7559	8.75534
	1	107.143			-1.4039	-16.6674	8.74219
	1	119.458			-1.4009	-16.579	8.72905
	1	45.7692			-1.3979	-16.4905	8.71592
	1	102.5			-1.39489	-16.4021	8.7028
	0	35.8036			-1.39189	-16.3136	8.68969
	0	64.2321			-1.38889	-16.2251	8.67658
	0	59.3509			-1.38589	-16.1367	8.66349
	0	58.8286			-1.38288	-16.0482	8.6504
	0	22.3284			-1.37988	-15.9597	8.63732
	0	42.5972			-1.37688	-15.8713	8.62425
	0	50.1364			-1.37387	-15.7828	8.61119
	0	63.4792			-1.37087	-15.6944	8.59813
	0	47.1045			-1.36787	-15.6059	8.58509
	0	24.3571			-1.36486	-15.5174	8.57206
	0	33.16			-1.36186	-15.429	8.55903
	0	40.6889			-1.35886	-15.3405	8.54601
	1	19.6182			-1.35586	-15.2521	8.533
	1	31.2456			-1.35285	-15.1636	8.52
	1	31.6721			-1.34985	-15.0751	8.50701
	1	54.75			-1.34685	-14.9867	8.49403
	1	12.1452			-1.34384	-14.8982	8.48106
	1	-2.15789			-1.34084	-14.8097	8.46809
	1	19.037			-1.33784	-14.7213	8.45514
	1	9.97872			-1.33483	-14.6328	8.44219
	1	38.6522			-1.33183	-14.5444	8.42926
	1	23.6765			-1.32883	-14.4559	8.41633
	1	6.42857			-1.32583	-14.3674	8.40342
	1	31.6042			-1.32282	-14.279	8.39051
	1	63.5345			-1.31982	-14.1905	8.37761
	1	64.1148			-1.31682	-14.1021	8.36472
	1	55.9828			-1.31381	-14.0136	8.35184
	1	54.0667			-1.31081	-13.9251	8.33897
	1	65.3824			-1.30781	-13.8367	8.32611
	1	64.44			-1.3048	-13.7482	8.31326
	1	71.4615			-1.3018	-13.6597	8.30042
	1	39.7551			-1.2988	-13.5713	8.28759
	1	48.3651			-1.2958	-13.4828	8.27477
	1	54.9394			-1.29279	-13.3944	8.26196
	1	36.4286			-1.28979	-13.3059	8.24916
	1	55.9773			-1.28679	-13.2174	8.23636
	-1	5.46667			-1.28378	-13.129	8.22358
	-1	-27.1667			-1.28078	-13.0405	8.21081
	-1	-7.33929			-1.27778	-12.9521	8.19805
	-1	-8.18605			-1.27477	-12.8636	8.1853
	-1	-4.57627			-1.27177	-12.7751	8.17256
	-1	5.65			-1.26877	-12.6867	8.15983
	-1	3.40625			-1.26577	-12.5982	8.14711
	-1	-2.58974			-1.26276	-12.5097	8.1344
	-1	37.25			-1.25976	-12.4213	8.1217
	-1	1.84211			-1.25676	-12.3328	8.10901
	-1	4.39535			-1.25375	-12.2444	8.09633
	-1	13.5484			-1.25075	-12.1559	8.08366
	-1	10.8605			-1.24775	-12.0674	8.071
	-1	-17.7679			-1.24474	-11.979	8.05836
	-1	-7.38182			-1.24174	-11.8905	8.04572
	-1	-1.25			-1.23874	-11.802	8.03309
	-1	2.85965			-1.23574	-11.7136	8.02048
	-1	-3.27273			-1.23273	-11.6251	8.00788
	-1	-4.32258			-1.22973	-11.5367	7.99528
	-1	-16.225			-1.22673	-11.4482	7.9827
	-1	5.46154			-1.22372	-11.3597	7.97013
	-1	-12.3125			-1.22072	-11.2713	7.95757
	-1	9.65306			-1.21772	-11.1828	7.94502
	-1	-18.5556			-1.21471	-11.0944	7.93248
	1	19.6905			-1.21171	-11.0059	7.91995
	1	0.188679			-1.20871	-10.9174	7.90744
	1	2.92727			-1.20571	-10.829	7.89493
	1	16.8372			-1.2027	-10.7405	7.88244
	1	8.40323			-1.1997	-10.652	7.86996
	1	22.5862			-1.1967	-10.5636	7.85749
	1	10.3438			-1.19369	-10.4751	7.84503
	1	15.7179			-1.19069	-10.3867	7.83258
	1	9.16667			-1.18769	-10.2982	7.82015
	1	-14.825			-1.18468	-10.2097	7.80772
	1	8.4			-1.18168	-10.1213	7.79531
	1	26.3077			-1.17868	-10.0328	7.78291
	-1	-61.5			-1.17568	-9.94435	7.77052
	-1	-64.4062			-1.17267	-9.85589	7.75815
	-1	-41.3778			-1.16967	-9.76743	7.74578
	-1	-20.1633			-1.16667	-9.67897	7.73343
	-1	-22.2698			-1.16366	-9.59051	7.72109
	-1	-23.7385			-1.16066	-9.50205	7.70876
	-1	-26.5686			-1.15766	-9.41358	7.69644
	-1	-26.9804			-1.15465	-9.32512	7.68414
	-1	-5.98148			-1.15165	-9.23666	7.67185
	-1	-0.0571429			-1.14865	-9.1482	7.65957
	-1	-12.1579			-1.14565	-9.05974	7.6473
	-1	-16.1111			-1.14264	-8.97127	7.63505
	-1	-32.2128			-1.13964	-8.88281	7.6228
	-1	-26.2586			-1.13664	-8.79435	7.61057
	-1	-6.97619			-1.13363	-8.70589	7.59836
	-1	-17.8298			-1.13063	-8.61743	7.58615
	-1	15.129			-1.12763	-8.52897	7.57396
	-1	0.344262			-1.12462	-8.4405	7.56178
	-1	-15.1373			-1.12162	-8.35204	7.54962
	-1	-18.617			-1.11862	-8.26358	7.53747
	-1	-8.39583			-1.11562	-8.17512	7.52533
	-1	-18.5806			-1.11261	-8.08666	7.5132
	-1	-0.84127			-1.10961	-7.9982	7.50109
	-1	-11.4565			-1.10661	-7.90973	7.48899
	-1	-56.4			-1.1036	-7.82127	7.4769
	-1	-21.9818			-1.1006	-7.73281	7.46483
	-1	-26.5319			-1.0976	-7.64435	7.45277
	-1	-27.2			-1.09459	-7.55589	7.44072
	-1	-3.2069			-1.09159	-7.46743	7.42869
	-1	-6.10606			-1.08859	-7.37896	7.41667
	-1	-8.30769			-1.08559	-7.2905	7.40466
	-1	-1.86			-1.08258	-7.20204	7.39267
	-1	-8.55769			-1.07958	-7.11358	7.38069
	-1	19.2857			-1.07658	-7.02512	7.36873
	-1	-19.6441			-1.07357	-6.93666	7.35678
	-1	1.55556			-1.07057	-6.84819	7.34484
					-1.06757	-6.75973	7.33292
					-1.06456	-6.67127	7.32101
					-1.06156	-6.58281	7.30912
					-1.05856	-6.49435	7.29724
					-1.05556	-6.40588	7.28538
					-1.05255	-6.31742	7.27352
					-1.04955	-6.22896	7.26169
					-1.04655	-6.1405	7.24987
					-1.04354	-6.05204	7.23806
					-1.04054	-5.96358	7.22627
					-1.03754	-5.87511	7.21449
					-1.03453	-5.78665	7.20273
					-1.03153	-5.69819	7.19098
					-1.02853	-5.60973	7.17925
					-1.02553	-5.52127	7.16753
					-1.02252	-5.43281	7.15583
					-1.01952	-5.34434	7.14414
					-1.01652	-5.25588	7.13247
					-1.01351	-5.16742	7.12081
					-1.01051	-5.07896	7.10917
					-1.00751	-4.9905	7.09755
					-1.0045	-4.90204	7.08594
					-1.0015	-4.81357	7.07434
					-0.998498	-4.72511	7.06276
					-0.995495	-4.63665	7.0512
					-0.992492	-4.54819	7.03966
					-0.98949	-4.45973	7.02813
					-0.986487	-4.37127	7.01661
					-0.983483	-4.2828	7.00511
					-0.98048	-4.19434	6.99363
					-0.977477	-4.10588	6.98217
					-0.974475	-4.01742	6.97072
					-0.971472	-3.92896	6.95928
					-0.968468	-3.8405	6.94787
					-0.965465	-3.75203	6.93647
					-0.962462	-3.66357	6.92508
					-0.95946	-3.57511	6.91372
					-0.956457	-3.48665	6.90237
					-0.953453	-3.39819	6.89104
					-0.95045	-3.30972	6.87972
					-0.947447	-3.22126	6.86842
					-0.944444	-3.1328	6.85714
					-0.941441	-3.04434	6.84588
					-0.938438	-2.95588	6.83463
					-0.935435	-2.86742	6.8234
					-0.932432	-2.77895	6.81219
					-0.929429	-2.69049	6.801
					-0.926426	-2.60203	6.78982
					-0.923423	-2.51357	6.77867
					-0.92042	-2.42511	6.76753
					-0.917417	-2.33665	6.7564
					-0.914414	-2.24818	6.7453
					-0.911411	-2.15972	6.73421
					-0.908408	-2.07126	6.72315
					-0.905405	-1.9828	6.7121
					-0.902402	-1.89434	6.70107
					-0.899399	-1.80588	6.69006
					-0.896396	-1.71741	6.67906
					-0.893393	-1.62895	6.66809
					-0.89039	-1.54049	6.65713
					-0.887387	-1.45203	6.6462
					-0.884384	-1.36357	6.63528
					-0.881381	-1.27511	6.62438
					-0.878378	-1.18664	6.6135
					-0.875375	-1.09818	6.60264
					-0.872372	-1.00972	6.5918
					-0.869369	-0.921259	6.58098
					-0.866366	-0.832797	6.57017
					-0.863363	-0.744335	6.55939
					-0.86036	-0.655873	6.54863
					-0.857357	-0.567412	6.53789
					-0.854354	-0.47895	6.52717
					-0.851351	-0.390488	6.51646
					-0.848348	-0.302027	6.50578
					-0.845345	-0.213565	6.49512
					-0.842342	-0.125103	6.48448
					-0.839339	-0.0366414	6.47386
					-0.836336	0.0518203	6.46326
					-0.833333	0.140282	6.45268
					-0.83033	0.228744	6.44212
					-0.827327	0.317205	6.43158
					-0.824324	0.405667	6.42106
					-0.821321	0.494129	6.41057
					-0.818318	0.582591	6.40009
					-0.815315	0.671052	6.38964
					-0.812312	0.759514	6.3792
					-0.809309	0.847976	6.36879
					-0.806306	0.936437	6.3584
					-0.803303	1.0249	6.34804
					-0.8003	1.11336	6.33769
					-0.797297	1.20182	6.32737
					-0.794294	1.29028	6.31707
					-0.791291	1.37875	6.30679
					-0.788288	1.46721	6.29653
					-0.785285	1.55567	6.28629
					-0.782282	1.64413	6.27608
					-0.779279	1.73259	6.26589
					-0.776276	1.82105	6.25572
					-0.773273	1.90952	6.24558
					-0.77027	1.99798	6.23546
					-0.767267	2.08644	6.22536
					-0.764264	2.1749	6.21529
					-0.761261	2.26336	6.20523
					-0.758258	2.35182	6.1952
					-0.755255	2.44029	6.1852
					-0.752252	2.52875	6.17522
					-0.749249	2.61721	6.16526
					-0.746246	2.70567	6.15533
					-0.743243	2.79413	6.14542
					-0.74024	2.88259	6.13553
					-0.737237	2.97106	6.12567
					-0.734234	3.05952	6.11583
					-0.731231	3.14798	6.10602
					-0.728228	3.23644	6.09623
					-0.725225	3.3249	6.08646
					-0.722222	3.41337	6.07672
					-0.719219	3.50183	6.06701
					-0.716216	3.59029	6.05732
					-0.713213	3.67875	6.04766
					-0.71021	3.76721	6.03802
					-0.707207	3.85567	6.0284
					-0.704204	3.94414	6.01881
					-0.701201	4.0326	6.00925
					-0.698198	4.12106	5.99972
					-0.695195	4.20952	5.9902
					-0.692192	4.29798	5.98072
					-0.689189	4.38644	5.97126
					-0.686186	4.47491	5.96183
					-0.683183	4.56337	5.95242
					-0.68018	4.65183	5.94304
					-0.677177	4.74029	5.93369
					-0.674174	4.82875	5.92436
					-0.671171	4.91721	5.91506
					-0.668168	5.00568	5.90579
					-0.665165	5.09414	5.89654
					-0.662162	5.1826	5.88732
					-0.659159	5.27106	5.87813
					-0.656156	5.35952	5.86897
					-0.653153	5.44798	5.85983
					-0.65015	5.53645	5.85072
					-0.647147	5.62491	5.84164
					-0.644144	5.71337	5.83259
					-0.641141	5.80183	5.82357
					-0.638138	5.89029	5.81457
					-0.635135	5.97875	5.8056
					-0.632132	6.06722	5.79666
					-0.629129	6.15568	5.78775
					-0.626126	6.24414	5.77887
					-0.623123	6.3326	5.77002
					-0.62012	6.42106	5.76119
					-0.617117	6.50953	5.7524
					-0.614114	6.59799	5.74363
					-0.611111	6.68645	5.7349
					-0.608108	6.77491	5.72619
					-0.605105	6.86337	5.71751
					-0.602102	6.95183	5.70887
					-0.599099	7.0403	5.70025
					-0.596096	7.12876	5.69166
					-0.593093	7.21722	5.68311
					-0.59009	7.30568	5.67458
					-0.587087	7.39414	5.66609
					-0.584084	7.4826	5.65762
					-0.581081	7.57107	5.64919
					-0.578078	7.65953	5.64079
					-0.575075	7.74799	5.63241
					-0.572072	7.83645	5.62407
					-0.569069	7.92491	5.61576
					-0.566066	8.01337	5.60749
					-0.563063	8.10184	5.59924
					-0.56006	8.1903	5.59103
					-0.557057	8.27876	5.58284
					-0.554054	8.36722	5.57469
					-0.551051	8.45568	5.56658
					-0.548048	8.54415	5.55849
					-0.545045	8.63261	5.55044
					-0.542042	8.72107	5.54242
					-0.539039	8.80953	5.53443
					-0.536036	8.89799	5.52648
					-0.533033	8.98645	5.51855
					-0.53003	9.07492	5.51067
					-0.527027	9.16338	5.50281
					-0.524024	9.25184	5.49499
					-0.521021	9.3403	5.4872
					-0.518018	9.42876	5.47945
					-0.515015	9.51722	5.47173
					-0.512012	9.60568	5.46404
					-0.509009	9.69415	5.45639
					-0.506006	9.78261	5.44877
					-0.503003	9.87107	5.44119
					-0.5	9.95953	5.43364
					-0.496997	10.048	5.42613
					-0.493994	10.1365	5.41865
					-0.490991	10.2249	5.4112
					-0.487988	10.3134	5.4038
					-0.484985	10.4018	5.39642
					-0.481982	10.4903	5.38908
					-0.478979	10.5788	5.38178
					-0.475976	10.6672	5.37452
					-0.472973	10.7557	5.36729
					-0.46997	10.8442	5.36009
					-0.466967	10.9326	5.35294
					-0.463964	11.0211	5.34581
					-0.460961	11.1095	5.33873
					-0.457958	11.198	5.33168
					-0.454955	11.2865	5.32467
					-0.451952	11.3749	5.3177
					-0.448949	11.4634	5.31076
					-0.445946	11.5518	5.30386
					-0.442943	11.6403	5.297
					-0.43994	11.7288	5.29017
					-0.436937	11.8172	5.28338
					-0.433934	11.9057	5.27663
					-0.430931	11.9942	5.26992
					-0.427928	12.0826	5.26325
					-0.424925	12.1711	5.25661
					-0.421922	12.2595	5.25002
					-0.418919	12.348	5.24346
					-0.415916	12.4365	5.23694
					-0.412913	12.5249	5.23046
					-0.40991	12.6134	5.22402
					-0.406907	12.7018	5.21762
					-0.403904	12.7903	5.21125
					-0.400901	12.8788	5.20493
					-0.397898	12.9672	5.19865
					-0.394895	13.0557	5.1924
					-0.391892	13.1442	5.1862
					-0.388889	13.2326	5.18003
					-0.385886	13.3211	5.17391
					-0.382883	13.4095	5.16783
					-0.37988	13.498	5.16178
					-0.376877	13.5865	5.15578
					-0.373874	13.6749	5.14982
					-0.370871	13.7634	5.1439
					-0.367868	13.8518	5.13802
					-0.364865	13.9403	5.13218
					-0.361862	14.0288	5.12638
					-0.358859	14.1172	5.12062
					-0.355856	14.2057	5.11491
					-0.352853	14.2942	5.10924
					-0.34985	14.3826	5.1036
					-0.346847	14.4711	5.09802
					-0.343844	14.5595	5.09247
					-0.340841	14.648	5.08696
					-0.337838	14.7365	5.0815
					-0.334835	14.8249	5.07608
					-0.331832	14.9134	5.0707
					-0.328829	15.0018	5.06537
					-0.325826	15.0903	5.06008
					-0.322823	15.1788	5.05483
					-0.31982	15.2672	5.04962
					-0.316817	15.3557	5.04446
					-0.313814	15.4442	5.03934
					-0.310811	15.5326	5.03427
					-0.307808	15.6211	5.02924
					-0.304805	15.7095	5.02425
					-0.301802	15.798	5.01931
					-0.298799	15.8865	5.01441
					-0.295796	15.9749	5.00955
					-0.292793	16.0634	5.00474
					-0.28979	16.1519	4.99998
					-0.286787	16.2403	4.99526
					-0.283784	16.3288	4.99058
					-0.280781	16.4172	4.98595
					-0.277778	16.5057	4.98136
					-0.274775	16.5942	4.97682
					-0.271772	16.6826	4.97233
					-0.268769	16.7711	4.96788
					-0.265766	16.8595	4.96347
					-0.262763	16.948	4.95911
					-0.25976	17.0365	4.9548
					-0.256757	17.1249	4.95053
					-0.253754	17.2134	4.94631
					-0.250751	17.3019	4.94213
					-0.247748	17.3903	4.938
					-0.244745	17.4788	4.93392
					-0.241742	17.5672	4.92988
					-0.238739	17.6557	4.92589
					-0.235736	17.7442	4.92195
					-0.232733	17.8326	4.91806
					-0.22973	17.9211	4.91421
					-0.226727	18.0095	4.9104
					-0.223724	18.098	4.90665
					-0.220721	18.1865	4.90294
					-0.217718	18.2749	4.89928
					-0.214715	18.3634	4.89567
					-0.211712	18.4519	4.8921
					-0.208709	18.5403	4.88858
					-0.205706	18.6288	4.88511
					-0.202703	18.7172	4.88169
					-0.1997	18.8057	4.87832
					-0.196697	18.8942	4.87499
					-0.193694	18.9826	4.87171
					-0.190691	19.0711	4.86848
					-0.187688	19.1595	4.8653
					-0.184685	19.248	4.86217
					-0.181682	19.3365	4.85908
					-0.178679	19.4249	4.85605
					-0.175676	19.5134	4.85306
					-0.172673	19.6019	4.85012
					-0.16967	19.6903	4.84723
					-0.166667	19.7788	4.84439
					-0.163664	19.8672	4.8416
					-0.160661	19.9557	4.83886
					-0.157658	20.0442	4.83617
					-0.154655	20.1326	4.83352
					-0.151652	20.2211	4.83093
					-0.148649	20.3096	4.82839
					-0.145646	20.398	4.82589
					-0.142643	20.4865	4.82345
					-0.13964	20.5749	4.82105
					-0.136637	20.6634	4.8187
					-0.133634	20.7519	4.81641
					-0.130631	20.8403	4.81416
					-0.127628	20.9288	4.81197
					-0.124625	21.0172	4.80982
					-0.121622	21.1057	4.80773
					-0.118619	21.1942	4.80568
					-0.115616	21.2826	4.80369
					-0.112613	21.3711	4.80174
					-0.10961	21.4596	4.79985
					-0.106607	21.548	4.798
					-0.103604	21.6365	4.79621
					-0.100601	21.7249	4.79447
					-0.0975976	21.8134	4.79278
					-0.0945946	21.9019	4.79113
					-0.0915916	21.9903	4.78954
					-0.0885886	22.0788	4.78801
					-0.0855856	22.1672	4.78652
					-0.0825826	22.2557	4.78508
					-0.0795796	22.3442	4.78369
					-0.0765766	22.4326	4.78235
					-0.0735736	22.5211	4.78107
					-0.0705706	22.6096	4.77984
					-0.0675676	22.698	4.77865
					-0.0645646	22.7865	4.77752
					-0.0615616	22.8749	4.77644
					-0.0585586	22.9634	4.77541
					-0.0555556	23.0519	4.77443
					-0.0525526	23.1403	4.77351
					-0.0495495	23.2288	4.77263
					-0.0465465	23.3173	4.77181
					-0.0435435	23.4057	4.77104
					-0.0405405	23.4942	4.77031
					-0.0375375	23.5826	4.76964
					-0.0345345	23.6711	4.76903
					-0.0315315	23.7596	4.76846
					-0.0285285	23.848	4.76794
					-0.0255255	23.9365	4.76748
					-0.0225225	24.0249	4.76707
					-0.0195195	24.1134	4.76671
					-0.0165165	24.2019	4.7664
					-0.0135135	24.2903	4.76614
					-0.0105105	24.3788	4.76593
					-0.00750751	24.4673	4.76578
					-0.0045045	24.5557	4.76567
					-0.0015015	24.6442	4.76562
					0.0015015	24.7326	4.76562
					0.0045045	24.8211	4.76567
					0.00750751	24.9096	4.76578
					0.0105105	24.998	4.76593
					0.0135135	25.0865	4.76614
					0.0165165	25.1749	4.7664
					0.0195195	25.2634	4.76671
					0.0225225	25.3519	4.76707
					0.0255255	25.4403	4.76748
					0.0285285	25.5288	4.76794
					0.0315315	25.6173	4.76846
					0.0345345	25.7057	4.76903
					0.0375375	25.7942	4.76964
					0.0405405	25.8826	4.77031
					0.0435435	25.9711	4.77104
					0.0465465	26.0596	4.77181
					0.0495495	26.148	4.77263
					0.0525526	26.2365	4.77351
					0.0555556	26.325	4.77443
					0.0585586	26.4134	4.77541
					0.0615616	26.5019	4.77644
					0.0645646	26.5903	4.77752
					0.0675676	26.6788	4.77865
					0.0705706	26.7673	4.77984
					0.0735736	26.8557	4.78107
					0.0765766	26.9442	4.78235
					0.0795796	27.0326	4.78369
					0.0825826	27.1211	4.78508
					0.0855856	27.2096	4.78652
					0.0885886	27.298	4.78801
					0.0915916	27.3865	4.78954
					0.0945946	27.4749	4.79113
					0.0975976	27.5634	4.79278
					0.100601	27.6519	4.79447
					0.103604	27.7403	4.79621
					0.106607	27.8288	4.798
					0.10961	27.9173	4.79985
					0.112613	28.0057	4.80174
					0.115616	28.0942	4.80369
					0.118619	28.1826	4.80568
					0.121622	28.2711	4.80773
					0.124625	28.3596	4.80982
					0.127628	28.448	4.81197
					0.130631	28.5365	4.81416
					0.133634	28.625	4.81641
					0.136637	28.7134	4.8187
					0.13964	28.8019	4.82105
					0.142643	28.8903	4.82345
					0.145646	28.9788	4.82589
					0.148649	29.0673	4.82839
					0.151652	29.1557	4.83093
					0.154655	29.2442	4.83352
					0.157658	29.3326	4.83617
					0.160661	29.4211	4.83886
					0.163664	29.5096	4.8416
					0.166667	29.598	4.84439
					0.16967	29.6865	4.84723
					0.172673	29.775	4.85012
					0.175676	29.8634	4.85306
					0.178679	29.9519	4.85605
					0.181682	30.0403	4.85908
					0.184685	30.1288	4.86217
					0.187688	30.2173	4.8653
					0.190691	30.3057	4.86848
					0.193694	30.3942	4.87171
					0.196697	30.4826	4.87499
					0.1997	30.5711	4.87832
					0.202703	30.6596	4.88169
					0.205706	30.748	4.88511
					0.208709	30.8365	4.88858
					0.211712	30.925	4.8921
					0.214715	31.0134	4.89567
					0.217718	31.1019	4.89928
					0.220721	31.1903	4.90294
					0.223724	31.2788	4.90665
					0.226727	31.3673	4.9104
					0.22973	31.4557	4.91421
					0.232733	31.5442	4.91806
					0.235736	31.6327	4.92195
					0.238739	31.7211	4.92589
					0.241742	31.8096	4.92988
					0.244745	31.898	4.93392
					0.247748	31.9865	4.938
					0.250751	32.075	4.94213
					0.253754	32.1634	4.94631
					0.256757	32.2519	4.95053
					0.25976	32.3403	4.9548
					0.262763	32.4288	4.95911
					0.265766	32.5173	4.96347
					0.268769	32.6057	4.96788
					0.271772	32.6942	4.97233
					0.274775	32.7827	4.97682
					0.277778	32.8711	4.98136
					0.280781	32.9596	4.98595
					0.283784	33.048	4.99058
					0.286787	33.1365	4.99526
					0.28979	33.225	4.99998
					0.292793	33.3134	5.00474
					0.295796	33.4019	5.00955
					0.298799	33.4903	5.01441
					0.301802	33.5788	5.01931
					0.304805	33.6673	5.02425
					0.307808	33.7557	5.02924
					0.310811	33.8442	5.03427
					0.313814	33.9327	5.03934
					0.316817	34.0211	5.04446
					0.31982	34.1096	5.04962
					0.322823	34.198	5.05483
					0.325826	34.2865	5.06008
					0.328829	34.375	5.06537
					0.331832	34.4634	5.0707
					0.334835	34.5519	5.07608
					0.337838	34.6403	5.0815
					0.340841	34.7288	5.08696
					0.343844	34.8173	5.09247
					0.346847	34.9057	5.09802
					0.34985	34.9942	5.1036
					0.352853	35.0827	5.10924
					0.355856	35.1711	5.11491
					0.358859	35.2596	5.12062
					0.361862	35.348	5.12638
					0.364865	35.4365	5.13218
					0.367868	35.525	5.13802
					0.370871	35.6134	5.1439
					0.373874	35.7019	5.14982
					0.376877	35.7903	5.15578
					0.37988	35.8788	5.16178
					0.382883	35.9673	5.16783
					0.385886	36.0557	5.17391
					0.388889	36.1442	5.18003
					0.391892	36.2327	5.1862
					0.394895	36.3211	5.1924
					0.397898	36.4096	5.19865
					0.400901	36.498	5.20493
					0.403904	36.5865	5.21125
					0.406907	36.675	5.21762
					0.40991	36.7634	5.22402
					0.412913	36.8519	5.23046
					0.415916	36.9404	5.23694
					0.418919	37.0288	5.24346
					0.421922	37.1173	5.25002
					0.424925	37.2057	5.25661
					0.427928	37.2942	5.26325
					0.430931	37.3827	5.26992
					0.433934	37.4711	5.27663
					0.436937	37.5596	5.28338
					0.43994	37.648	5.29017
					0.442943	37.7365	5.297
					0.445946	37.825	5.30386
					0.448949	37.9134	5.31076
					0.451952	38.0019	5.3177
					0.454955	38.0904	5.32467
					0.457958	38.1788	5.33168
					0.460961	38.2673	5.33873
					0.463964	38.3557	5.34581
					0.466967	38.4442	5.35294
					0.46997	38.5327	5.36009
					0.472973	38.6211	5.36729
					0.475976	38.7096	5.37452
					0.478979	38.7981	5.38178
					0.481982	38.8865	5.38908
					0.484985	38.975	5.39642
					0.487988	39.0634	5.4038
					0.490991	39.1519	5.4112
					0.493994	39.2404	5.41865
					0.496997	39.3288	5.42613
					0.5	39.4173	5.43364
					0.503003	39.5057	5.44119
					0.506006	39.5942	5.44877
					0.509009	39.6827	5.45639
					0.512012	39.7711	5.46404
					0.515015	39.8596	5.47173
					0.518018	39.9481	5.47945
					0.521021	40.0365	5.4872
					0.524024	40.125	5.49499
					0.527027	40.2134	5.50281
					0.53003	40.3019	5.51067
					0.533033	40.3904	5.51855
					0.536036	40.4788	5.52648
					0.539039	40.5673	5.53443
					0.542042	40.6557	5.54242
					0.545045	40.7442	5.55044
					0.548048	40.8327	5.55849
					0.551051	40.9211	5.56658
					0.554054	41.0096	5.57469
					0.557057	41.0981	5.58284
					0.56006	41.1865	5.59103
					0.563063	41.275	5.59924
					0.566066	41.3634	5.60749
					0.569069	41.4519	5.61576
					0.572072	41.5404	5.62407
					0.575075	41.6288	5.63241
					0.578078	41.7173	5.64079
					0.581081	41.8057	5.64919
					0.584084	41.8942	5.65762
					0.587087	41.9827	5.66609
					0.59009	42.0711	5.67458
					0.593093	42.1596	5.68311
					0.596096	42.2481	5.69166
					0.599099	42.3365	5.70025
					0.602102	42.425	5.70887
					0.605105	42.5134	5.71751
					0.608108	42.6019	5.72619
					0.611111	42.6904	5.7349
					0.614114	42.7788	5.74363
					0.617117	42.8673	5.7524
					0.62012	42.9558	5.76119
					0.623123	43.0442	5.77002
					0.626126	43.1327	5.77887
					0.629129	43.2211	5.78775
					0.632132	43.3096	5.79666
					0.635135	43.3981	5.8056
					0.638138	43.4865	5.81457
					0.641141	43.575	5.82357
					0.644144	43.6634	5.83259
					0.647147	43.7519	5.84164
					0.65015	43.8404	5.85072
					0.653153	43.9288	5.85983
					0.656156	44.0173	5.86897
					0.659159	44.1058	5.87813
					0.662162	44.1942	5.88732
					0.665165	44.2827	5.89654
					0.668168	44.3711	5.90579
					0.671171	44.4596	5.91506
					0.674174	44.5481	5.92436
					0.677177	44.6365	5.93369
					0.68018	44.725	5.94304
					0.683183	44.8134	5.95242
					0.686186	44.9019	5.96183
					0.689189	44.9904	5.97126
					0.692192	45.0788	5.98072
					0.695195	45.1673	5.9902
					0.698198	45.2558	5.99972
					0.701201	45.3442	6.00925
					0.704204	45.4327	6.01881
					0.707207	45.5211	6.0284
					0.71021	45.6096	6.03802
					0.713213	45.6981	6.04766
					0.716216	45.7865	6.05732
					0.719219	45.875	6.06701
					0.722222	45.9635	6.07672
					0.725225	46.0519	6.08646
					0.728228	46.1404	6.09623
					0.731231	46.2288	6.10602
					0.734234	46.3173	6.11583
					0.737237	46.4058	6.12567
					0.74024	46.4942	6.13553
					0.743243	46.5827	6.14542
					0.746246	46.6711	6.15533
					0.749249	46.7596	6.16526
					0.752252	46.8481	6.17522
					0.755255	46.9365	6.1852
					0.758258	47.025	6.1952
					0.761261	47.1135	6.20523
					0.764264	47.2019	6.21529
					0.767267	47.2904	6.22536
					0.77027	47.3788	6.23546
					0.773273	47.4673	6.24558
					0.776276	47.5558	6.25572
					0.779279	47.6442	6.26589
					0.782282	47.7327	6.27608
					0.785285	47.8211	6.28629
					0.788288	47.9096	6.29653
					0.791291	47.9981	6.30679
					0.794294	48.0865	6.31707
					0.797297	48.175	6.32737
					0.8003	48.2635	6.33769
					0.803303	48.3519	6.34804
					0.806306	48.4404	6.3584
					0.809309	48.5288	6.36879
					0.812312	48.6173	6.3792
					0.815315	48.7058	6.38964
					0.818318	48.7942	6.40009
					0.821321	48.8827	6.41057
					0.824324	48.9712	6.42106
					0.827327	49.0596	6.43158
					0.83033	49.1481	6.44212
					0.833333	49.2365	6.45268
					0.836336	49.325	6.46326
					0.839339	49.4135	6.47386
					0.842342	49.5019	6.48448
					0.845345	49.5904	6.49512
					0.848348	49.6788	6.50578
					0.851351	49.7673	6.51646
					0.854354	49.8558	6.52717
					0.857357	49.9442	6.53789
					0.86036	50.0327	6.54863
					0.863363	50.1212	6.55939
					0.866366	50.2096	6.57017
					0.869369	50.2981	6.58098
					0.872372	50.3865	6.5918
					0.875375	50.475	6.60264
					0.878378	50.5635	6.6135
					0.881381	50.6519	6.62438
					0.884384	50.7404	6.63528
					0.887387	50.8288	6.6462
					0.89039	50.9173	6.65713
					0.893393	51.0058	6.66809
					0.896396	51.0942	6.67906
					0.899399	51.1827	6.69006
					0.902402	51.2712	6.70107
					0.905405	51.3596	6.7121
					0.908408	51.4481	6.72315
					0.911411	51.5365	6.73421
					0.914414	51.625	6.7453
					0.917417	51.7135	6.7564
					0.92042	51.8019	6.76753
					0.923423	51.8904	6.77867
					0.926426	51.9788	6.78982
					0.929429	52.0673	6.801
					0.932432	52.1558	6.81219
					0.935435	52.2442	6.8234
					0.938438	52.3327	6.83463
					0.941441	52.4212	6.84588
					0.944444	52.5096	6.85714
					0.947447	52.5981	6.86842
					0.95045	52.6865	6.87972
					0.953453	52.775	6.89104
					0.956457	52.8635	6.90237
					0.95946	52.9519	6.91372
					0.962462	53.0404	6.92508
					0.965465	53.1288	6.93647
					0.968468	53.2173	6.94787
					0.971472	53.3058	6.95928
					0.974475	53.3942	6.97072
					0.977477	53.4827	6.98217
					0.98048	53.5712	6.99363
					0.983483	53.6596	7.00511
					0.986487	53.7481	7.01661
					0.98949	53.8365	7.02813
					0.992492	53.925	7.03966
					0.995495	54.0135	7.0512
					0.998498	54.1019	7.06276
					1.0015	54.1904	7.07434
					1.0045	54.2788	7.08594
					1.00751	54.3673	7.09755
					1.01051	54.4558	7.10917
					1.01351	54.5442	7.12081
					1.01652	54.6327	7.13247
					1.01952	54.7212	7.14414
					1.02252	54.8096	7.15583
					1.02553	54.8981	7.16753
					1.02853	54.9865	7.17925
					1.03153	55.075	7.19098
					1.03453	55.1635	7.20273
					1.03754	55.2519	7.21449
					1.04054	55.3404	7.22627
					1.04354	55.4289	7.23806
					1.04655	55.5173	7.24987
					1.04955	55.6058	7.26169
					1.05255	55.6942	7.27352
					1.05556	55.7827	7.28538
					1.05856	55.8712	7.29724
					1.06156	55.9596	7.30912
					1.06456	56.0481	7.32101
					1.06757	56.1365	7.33292
					1.07057	56.225	7.34484
					1.07357	56.3135	7.35678
					1.07658	56.4019	7.36873
					1.07958	56.4904	7.38069
					1.08258	56.5789	7.39267
					1.08559	56.6673	7.40466
					1.08859	56.7558	7.41667
					1.09159	56.8442	7.42869
					1.09459	56.9327	7.44072
					1.0976	57.0212	7.45277
					1.1006	57.1096	7.46483
					1.1036	57.1981	7.4769
					1.10661	57.2865	7.48899
					1.10961	57.375	7.50109
					1.11261	57.4635	7.5132
					1.11562	57.5519	7.52533
					1.11862	57.6404	7.53747
					1.12162	57.7289	7.54962
					1.12462	57.8173	7.56178
					1.12763	57.9058	7.57396
					1.13063	57.9942	7.58615
					1.13363	58.0827	7.59836
					1.13664	58.1712	7.61057
					1.13964	58.2596	7.6228
					1.14264	58.3481	7.63505
					1.14565	58.4365	7.6473
					1.14865	58.525	7.65957
					1.15165	58.6135	7.67185
					1.15465	58.7019	7.68414
					1.15766	58.7904	7.69644
					1.16066	58.8789	7.70876
					1.16366	58.9673	7.72109
					1.16667	59.0558	7.73343
					1.16967	59.1442	7.74578
					1.17267	59.2327	7.75815
					1.17568	59.3212	7.77052
					1.17868	59.4096	7.78291
					1.18168	59.4981	7.79531
					1.18468	59.5866	7.80772
					1.18769	59.675	7.82015
					1.19069	59.7635	7.83258
					1.19369	59.8519	7.84503
					1.1967	59.9404	7.85749
					1.1997	60.0289	7.86996
					1.2027	60.1173	7.88244
					1.20571	60.2058	7.89493
					1.20871	60.2942	7.90744
					1.21171	60.3827	7.91995
					1.21471	60.4712	7.93248
					1.21772	60.5596	7.94502
					1.22072	60.6481	7.95757
					1.22372	60.7366	7.97013
					1.22673	60.825	7.9827
					1.22973	60.9135	7.99528
					1.23273	61.0019	8.00788
					1.23574	61.0904	8.02048
					1.23874	61.1789	8.03309
					1.24174	61.2673	8.04572
					1.24474	61.3558	8.05836
					1.24775	61.4442	8.071
					1.25075	61.5327	8.08366
					1.25375	61.6212	8.09633
					1.25676	61.7096	8.10901
					1.25976	61.7981	8.1217
					1.26276	61.8866	8.1344
					1.26577	61.975	8.14711
					1.26877	62.0635	8.15983
					1.27177	62.1519	8.17256
					1.27477	62.2404	8.1853
					1.27778	62.3289	8.19805
					1.28078	62.4173	8.21081
					1.28378	62.5058	8.22358
					1.28679	62.5943	8.23636
					1.28979	62.6827	8.24916
					1.29279	62.7712	8.26196
					1.2958	62.8596	8.27477
					1.2988	62.9481	8.28759
					1.3018	63.0366	8.30042
					1.3048	63.125	8.31326
					1.30781	63.2135	8.32611
					1.31081	63.3019	8.33897
					1.31381	63.3904	8.35184
					1.31682	63.4789	8.36472
					1.31982	63.5673	8.37761
					1.32282	63.6558	8.39051
					1.32583	63.7443	8.40342
					1.32883	63.8327	8.41633
					1.33183	63.9212	8.42926
					1.33483	64.0096	8.44219
					1.33784	64.0981	8.45514
					1.34084	64.1866	8.46809
					1.34384	64.275	8.48106
					1.34685	64.3635	8.49403
					1.34985	64.4519	8.50701
					1.35285	64.5404	8.52
					1.35586	64.6289	8.533
					1.35886	64.7173	8.54601
					1.36186	64.8058	8.55903
					1.36486	64.8943	8.57206
					1.36787	64.9827	8.58509
					1.37087	65.0712	8.59813
					1.37387	65.1596	8.61119
					1.37688	65.2481	8.62425
					1.37988	65.3366	8.63732
					1.38288	65.425	8.6504
					1.38589	65.5135	8.66349
					1.38889	65.602	8.67658
					1.39189	65.6904	8.68969
					1.39489	65.7789	8.7028
					1.3979	65.8673	8.71592
					1.4009	65.9558	8.72905
					1.4039	66.0443	8.74219
					1.40691	66.1327	8.75534
					1.40991	66.2212	8.7685
					1.41291	66.3097	8.78166
					1.41592	66.3981	8.79483
					1.41892	66.4866	8.80801
					1.42192	66.575	8.8212
					1.42492	66.6635	8.8344
					1.42793	66.7519	8.8476
					1.43093	66.8404	8.86081
					1.43393	66.9289	8.87403
					1.43694	67.0173	8.88726
					1.43994	67.1058	8.9005
					1.44294	67.1943	8.91374
					1.44595	67.2827	8.927
					1.44895	67.3712	8.94026
					1.45195	67.4596	8.95353
					1.45495	67.5481	8.9668
					1.45796	67.6366	8.98008
					1.46096	67.725	8.99338
					1.46396	67.8135	9.00667
					1.46697	67.902	9.01998
					1.46997	67.9904	9.0333
					1.47297	68.0789	9.04662
					1.47598	68.1673	9.05995
					1.47898	68.2558	9.07328
					1.48198	68.3443	9.08663
					1.48498	68.4327	9.09998
					1.48799	68.5212	9.11334
					1.49099	68.6097	9.1267
					1.49399	68.6981	9.14008
					1.497	68.7866	9.15346
					1.5	68.875	9.16685

## Sheet: Fig.S4h
scatter point	individual engagement score	distractor bias (ms)		fitted curve	individual engagement score	distractor bias (ms)	errorbar
	0	33.6429			-1.5	-13.9504	16.8246
	0	11.95			-1.497	-13.873	16.7952
	0	49.6591			-1.49399	-13.7956	16.7659
	0	38.2619			-1.49099	-13.7183	16.7366
	0	69.1346			-1.48799	-13.6409	16.7073
	0	79.4444			-1.48498	-13.5636	16.678
	0	86.8333			-1.48198	-13.4862	16.6487
	0	86.6889			-1.47898	-13.4089	16.6194
	0	85.9565			-1.47598	-13.3315	16.5901
	0	79.7241			-1.47297	-13.2542	16.5609
	0	81.1739			-1.46997	-13.1768	16.5316
	0	78.9688			-1.46697	-13.0995	16.5023
	1	64.7143			-1.46396	-13.0221	16.4731
	1	45.5714			-1.46096	-12.9447	16.4439
	1	57.1316			-1.45796	-12.8674	16.4146
	1	64.4571			-1.45495	-12.79	16.3854
	1	70.5			-1.45195	-12.7127	16.3562
	1	97.5532			-1.44895	-12.6353	16.327
	1	77.0286			-1.44595	-12.558	16.2978
	1	94.5641			-1.44294	-12.4806	16.2686
	1	85.0816			-1.43994	-12.4033	16.2394
	1	86.5333			-1.43694	-12.3259	16.2102
	1	109.727			-1.43393	-12.2485	16.1811
	1	76.375			-1.43093	-12.1712	16.1519
	0	40.4103			-1.42793	-12.0938	16.1228
	0	26.2453			-1.42492	-12.0165	16.0936
	0	62.8235			-1.42192	-11.9391	16.0645
	0	71.4865			-1.41892	-11.8618	16.0354
	0	64.4364			-1.41592	-11.7844	16.0063
	0	85.5833			-1.41291	-11.7071	15.9772
	0	62.3421			-1.40991	-11.6297	15.9481
	0	89			-1.40691	-11.5524	15.919
	0	107.143			-1.4039	-11.475	15.8899
	0	119.458			-1.4009	-11.3976	15.8608
	0	45.7692			-1.3979	-11.3203	15.8318
	0	102.5			-1.39489	-11.2429	15.8027
	0	35.8036			-1.39189	-11.1656	15.7737
	0	64.2321			-1.38889	-11.0882	15.7447
	0	59.3509			-1.38589	-11.0109	15.7156
	0	58.8286			-1.38288	-10.9335	15.6866
	0	22.3284			-1.37988	-10.8562	15.6576
	0	42.5972			-1.37688	-10.7788	15.6286
	0	50.1364			-1.37387	-10.7015	15.5996
	0	63.4792			-1.37087	-10.6241	15.5707
	0	47.1045			-1.36787	-10.5467	15.5417
	0	24.3571			-1.36486	-10.4694	15.5127
	0	33.16			-1.36186	-10.392	15.4838
	0	40.6889			-1.35886	-10.3147	15.4549
	1	19.6182			-1.35586	-10.2373	15.4259
	1	31.2456			-1.35285	-10.16	15.397
	1	31.6721			-1.34985	-10.0826	15.3681
	1	54.75			-1.34685	-10.0053	15.3392
	1	12.1452			-1.34384	-9.9279	15.3103
	1	-2.15789			-1.34084	-9.85055	15.2815
	1	19.037			-1.33784	-9.77319	15.2526
	1	9.97872			-1.33483	-9.69584	15.2237
	1	38.6522			-1.33183	-9.61848	15.1949
	1	23.6765			-1.32883	-9.54113	15.166
	1	6.42857			-1.32583	-9.46377	15.1372
	1	31.6042			-1.32282	-9.38642	15.1084
	0	63.5345			-1.31982	-9.30906	15.0796
	0	64.1148			-1.31682	-9.23171	15.0508
	0	55.9828			-1.31381	-9.15435	15.022
	0	54.0667			-1.31081	-9.077	14.9932
	0	65.3824			-1.30781	-8.99964	14.9645
	0	64.44			-1.3048	-8.92229	14.9357
	0	71.4615			-1.3018	-8.84493	14.907
	0	39.7551			-1.2988	-8.76758	14.8783
	0	48.3651			-1.2958	-8.69022	14.8495
	0	54.9394			-1.29279	-8.61287	14.8208
	0	36.4286			-1.28979	-8.53552	14.7921
	0	55.9773			-1.28679	-8.45816	14.7635
	-1	5.46667			-1.28378	-8.38081	14.7348
	-1	-27.1667			-1.28078	-8.30345	14.7061
	-1	-7.33929			-1.27778	-8.2261	14.6775
	-1	-8.18605			-1.27477	-8.14874	14.6488
	-1	-4.57627			-1.27177	-8.07138	14.6202
	-1	5.65			-1.26877	-7.99403	14.5916
	-1	3.40625			-1.26577	-7.91668	14.563
	-1	-2.58974			-1.26276	-7.83932	14.5344
	-1	37.25			-1.25976	-7.76197	14.5058
	-1	1.84211			-1.25676	-7.68461	14.4772
	-1	4.39535			-1.25375	-7.60726	14.4487
	-1	13.5484			-1.25075	-7.5299	14.4201
	-1	10.8605			-1.24775	-7.45255	14.3916
	-1	-17.7679			-1.24474	-7.37519	14.3631
	-1	-7.38182			-1.24174	-7.29784	14.3346
	-1	-1.25			-1.23874	-7.22048	14.3061
	-1	2.85965			-1.23574	-7.14313	14.2776
	-1	-3.27273			-1.23273	-7.06577	14.2491
	-1	-4.32258			-1.22973	-6.98842	14.2206
	-1	-16.225			-1.22673	-6.91106	14.1922
	-1	5.46154			-1.22372	-6.83371	14.1637
	-1	-12.3125			-1.22072	-6.75635	14.1353
	-1	9.65306			-1.21772	-6.679	14.1069
	-1	-18.5556			-1.21471	-6.60164	14.0785
	0	19.6905			-1.21171	-6.52429	14.0501
	0	0.188679			-1.20871	-6.44693	14.0218
	0	2.92727			-1.20571	-6.36958	13.9934
	0	16.8372			-1.2027	-6.29222	13.9651
	0	8.40323			-1.1997	-6.21487	13.9367
	0	22.5862			-1.1967	-6.13751	13.9084
	0	10.3438			-1.19369	-6.06016	13.8801
	0	15.7179			-1.19069	-5.9828	13.8518
	0	9.16667			-1.18769	-5.90545	13.8235
	0	-14.825			-1.18468	-5.82809	13.7953
	0	8.4			-1.18168	-5.75074	13.767
	0	26.3077			-1.17868	-5.67338	13.7388
	0	-61.5			-1.17568	-5.59603	13.7106
	0	-64.4062			-1.17267	-5.51867	13.6823
	0	-41.3778			-1.16967	-5.44132	13.6542
	0	-20.1633			-1.16667	-5.36396	13.626
	0	-22.2698			-1.16366	-5.28661	13.5978
	0	-23.7385			-1.16066	-5.20925	13.5697
	0	-26.5686			-1.15766	-5.1319	13.5415
	0	-26.9804			-1.15465	-5.05455	13.5134
	0	-5.98148			-1.15165	-4.97719	13.4853
	0	-0.0571429			-1.14865	-4.89984	13.4572
	0	-12.1579			-1.14565	-4.82248	13.4291
	0	-16.1111			-1.14264	-4.74513	13.401
	0	-32.2128			-1.13964	-4.66777	13.373
	0	-26.2586			-1.13664	-4.59042	13.345
	0	-6.97619			-1.13363	-4.51306	13.3169
	0	-17.8298			-1.13063	-4.43571	13.2889
	0	15.129			-1.12763	-4.35835	13.261
	0	0.344262			-1.12462	-4.281	13.233
	0	-15.1373			-1.12162	-4.20364	13.205
	0	-18.617			-1.11862	-4.12629	13.1771
	0	-8.39583			-1.11562	-4.04893	13.1492
	0	-18.5806			-1.11261	-3.97158	13.1212
	0	-0.84127			-1.10961	-3.89422	13.0934
	0	-11.4565			-1.10661	-3.81687	13.0655
	0	-56.4			-1.1036	-3.73951	13.0376
	0	-21.9818			-1.1006	-3.66216	13.0098
	0	-26.5319			-1.0976	-3.5848	12.9819
	0	-27.2			-1.09459	-3.50745	12.9541
	0	-3.2069			-1.09159	-3.43009	12.9263
	0	-6.10606			-1.08859	-3.35274	12.8986
	0	-8.30769			-1.08559	-3.27538	12.8708
	0	-1.86			-1.08258	-3.19803	12.843
	0	-8.55769			-1.07958	-3.12067	12.8153
	0	19.2857			-1.07658	-3.04332	12.7876
	0	-19.6441			-1.07357	-2.96596	12.7599
	0	1.55556			-1.07057	-2.88861	12.7322
					-1.06757	-2.81125	12.7046
					-1.06456	-2.7339	12.6769
					-1.06156	-2.65654	12.6493
					-1.05856	-2.57919	12.6217
					-1.05556	-2.50183	12.5941
					-1.05255	-2.42448	12.5665
					-1.04955	-2.34712	12.539
					-1.04655	-2.26977	12.5115
					-1.04354	-2.19241	12.4839
					-1.04054	-2.11506	12.4565
					-1.03754	-2.0377	12.429
					-1.03453	-1.96035	12.4015
					-1.03153	-1.88299	12.3741
					-1.02853	-1.80564	12.3467
					-1.02553	-1.72829	12.3193
					-1.02252	-1.65093	12.2919
					-1.01952	-1.57358	12.2645
					-1.01652	-1.49622	12.2372
					-1.01351	-1.41887	12.2098
					-1.01051	-1.34151	12.1825
					-1.00751	-1.26416	12.1553
					-1.0045	-1.1868	12.128
					-1.0015	-1.10945	12.1007
					-0.998498	-1.03209	12.0735
					-0.995495	-0.954736	12.0463
					-0.992492	-0.877382	12.0191
					-0.98949	-0.800027	11.992
					-0.986487	-0.722672	11.9648
					-0.983483	-0.645317	11.9377
					-0.98048	-0.567962	11.9106
					-0.977477	-0.490607	11.8835
					-0.974475	-0.413252	11.8565
					-0.971472	-0.335897	11.8295
					-0.968468	-0.258542	11.8024
					-0.965465	-0.181188	11.7754
					-0.962462	-0.103833	11.7485
					-0.95946	-0.0264778	11.7215
					-0.956457	0.0508771	11.6946
					-0.953453	0.128232	11.6677
					-0.95045	0.205587	11.6408
					-0.947447	0.282942	11.614
					-0.944444	0.360297	11.5871
					-0.941441	0.437652	11.5603
					-0.938438	0.515006	11.5336
					-0.935435	0.592361	11.5068
					-0.932432	0.669716	11.4801
					-0.929429	0.747071	11.4533
					-0.926426	0.824426	11.4267
					-0.923423	0.901781	11.4
					-0.92042	0.979136	11.3733
					-0.917417	1.05649	11.3467
					-0.914414	1.13385	11.3201
					-0.911411	1.2112	11.2936
					-0.908408	1.28856	11.267
					-0.905405	1.36591	11.2405
					-0.902402	1.44327	11.214
					-0.899399	1.52062	11.1875
					-0.896396	1.59797	11.1611
					-0.893393	1.67533	11.1347
					-0.89039	1.75268	11.1083
					-0.887387	1.83004	11.0819
					-0.884384	1.90739	11.0556
					-0.881381	1.98475	11.0293
					-0.878378	2.0621	11.003
					-0.875375	2.13946	10.9768
					-0.872372	2.21681	10.9505
					-0.869369	2.29417	10.9243
					-0.866366	2.37152	10.8982
					-0.863363	2.44888	10.872
					-0.86036	2.52623	10.8459
					-0.857357	2.60359	10.8198
					-0.854354	2.68094	10.7938
					-0.851351	2.7583	10.7677
					-0.848348	2.83565	10.7417
					-0.845345	2.91301	10.7157
					-0.842342	2.99036	10.6898
					-0.839339	3.06772	10.6639
					-0.836336	3.14507	10.638
					-0.833333	3.22243	10.6122
					-0.83033	3.29978	10.5863
					-0.827327	3.37714	10.5605
					-0.824324	3.45449	10.5348
					-0.821321	3.53185	10.509
					-0.818318	3.6092	10.4833
					-0.815315	3.68656	10.4577
					-0.812312	3.76391	10.432
					-0.809309	3.84127	10.4064
					-0.806306	3.91862	10.3808
					-0.803303	3.99598	10.3553
					-0.8003	4.07333	10.3298
					-0.797297	4.15069	10.3043
					-0.794294	4.22804	10.2789
					-0.791291	4.3054	10.2535
					-0.788288	4.38275	10.2281
					-0.785285	4.46011	10.2027
					-0.782282	4.53746	10.1774
					-0.779279	4.61482	10.1522
					-0.776276	4.69217	10.1269
					-0.773273	4.76952	10.1017
					-0.77027	4.84688	10.0765
					-0.767267	4.92424	10.0514
					-0.764264	5.00159	10.0263
					-0.761261	5.07894	10.0012
					-0.758258	5.1563	9.97622
					-0.755255	5.23365	9.95122
					-0.752252	5.31101	9.92627
					-0.749249	5.38836	9.90135
					-0.746246	5.46572	9.87647
					-0.743243	5.54307	9.85163
					-0.74024	5.62043	9.82682
					-0.737237	5.69778	9.80205
					-0.734234	5.77514	9.77732
					-0.731231	5.85249	9.75263
					-0.728228	5.92985	9.72798
					-0.725225	6.0072	9.70337
					-0.722222	6.08456	9.67879
					-0.719219	6.16191	9.65426
					-0.716216	6.23927	9.62977
					-0.713213	6.31662	9.60531
					-0.71021	6.39398	9.5809
					-0.707207	6.47133	9.55653
					-0.704204	6.54869	9.5322
					-0.701201	6.62604	9.50791
					-0.698198	6.7034	9.48367
					-0.695195	6.78075	9.45946
					-0.692192	6.85811	9.4353
					-0.689189	6.93546	9.41118
					-0.686186	7.01282	9.38711
					-0.683183	7.09017	9.36308
					-0.68018	7.16753	9.33909
					-0.677177	7.24488	9.31515
					-0.674174	7.32224	9.29125
					-0.671171	7.39959	9.26739
					-0.668168	7.47695	9.24358
					-0.665165	7.5543	9.21982
					-0.662162	7.63166	9.19611
					-0.659159	7.70901	9.17244
					-0.656156	7.78637	9.14881
					-0.653153	7.86372	9.12524
					-0.65015	7.94108	9.10171
					-0.647147	8.01843	9.07823
					-0.644144	8.09578	9.0548
					-0.641141	8.17314	9.03141
					-0.638138	8.2505	9.00808
					-0.635135	8.32785	8.98479
					-0.632132	8.40521	8.96156
					-0.629129	8.48256	8.93837
					-0.626126	8.55992	8.91524
					-0.623123	8.63727	8.89215
					-0.62012	8.71462	8.86912
					-0.617117	8.79198	8.84614
					-0.614114	8.86933	8.82321
					-0.611111	8.94669	8.80033
					-0.608108	9.02404	8.77751
					-0.605105	9.1014	8.75474
					-0.602102	9.17875	8.73202
					-0.599099	9.25611	8.70936
					-0.596096	9.33346	8.68675
					-0.593093	9.41082	8.6642
					-0.59009	9.48817	8.6417
					-0.587087	9.56553	8.61926
					-0.584084	9.64288	8.59688
					-0.581081	9.72024	8.57455
					-0.578078	9.79759	8.55228
					-0.575075	9.87495	8.53007
					-0.572072	9.9523	8.50791
					-0.569069	10.0297	8.48582
					-0.566066	10.107	8.46378
					-0.563063	10.1844	8.4418
					-0.56006	10.2617	8.41989
					-0.557057	10.3391	8.39803
					-0.554054	10.4164	8.37623
					-0.551051	10.4938	8.3545
					-0.548048	10.5711	8.33282
					-0.545045	10.6485	8.31121
					-0.542042	10.7259	8.28967
					-0.539039	10.8032	8.26818
					-0.536036	10.8806	8.24676
					-0.533033	10.9579	8.22541
					-0.53003	11.0353	8.20412
					-0.527027	11.1126	8.18289
					-0.524024	11.19	8.16173
					-0.521021	11.2673	8.14064
					-0.518018	11.3447	8.11961
					-0.515015	11.422	8.09865
					-0.512012	11.4994	8.07776
					-0.509009	11.5768	8.05694
					-0.506006	11.6541	8.03618
					-0.503003	11.7315	8.0155
					-0.5	11.8088	7.99489
					-0.496997	11.8862	7.97434
					-0.493994	11.9635	7.95387
					-0.490991	12.0409	7.93347
					-0.487988	12.1182	7.91314
					-0.484985	12.1956	7.89288
					-0.481982	12.2729	7.8727
					-0.478979	12.3503	7.85259
					-0.475976	12.4277	7.83256
					-0.472973	12.505	7.8126
					-0.46997	12.5824	7.79272
					-0.466967	12.6597	7.77291
					-0.463964	12.7371	7.75318
					-0.460961	12.8144	7.73353
					-0.457958	12.8918	7.71396
					-0.454955	12.9691	7.69446
					-0.451952	13.0465	7.67505
					-0.448949	13.1239	7.65571
					-0.445946	13.2012	7.63645
					-0.442943	13.2786	7.61728
					-0.43994	13.3559	7.59819
					-0.436937	13.4333	7.57917
					-0.433934	13.5106	7.56025
					-0.430931	13.588	7.5414
					-0.427928	13.6653	7.52264
					-0.424925	13.7427	7.50397
					-0.421922	13.82	7.48538
					-0.418919	13.8974	7.46687
					-0.415916	13.9748	7.44845
					-0.412913	14.0521	7.43012
					-0.40991	14.1295	7.41188
					-0.406907	14.2068	7.39373
					-0.403904	14.2842	7.37566
					-0.400901	14.3615	7.35769
					-0.397898	14.4389	7.33981
					-0.394895	14.5162	7.32201
					-0.391892	14.5936	7.30431
					-0.388889	14.6709	7.2867
					-0.385886	14.7483	7.26919
					-0.382883	14.8257	7.25177
					-0.37988	14.903	7.23444
					-0.376877	14.9804	7.21721
					-0.373874	15.0577	7.20008
					-0.370871	15.1351	7.18304
					-0.367868	15.2124	7.1661
					-0.364865	15.2898	7.14926
					-0.361862	15.3671	7.13251
					-0.358859	15.4445	7.11587
					-0.355856	15.5219	7.09932
					-0.352853	15.5992	7.08288
					-0.34985	15.6766	7.06654
					-0.346847	15.7539	7.0503
					-0.343844	15.8313	7.03416
					-0.340841	15.9086	7.01813
					-0.337838	15.986	7.0022
					-0.334835	16.0633	6.98638
					-0.331832	16.1407	6.97066
					-0.328829	16.218	6.95505
					-0.325826	16.2954	6.93955
					-0.322823	16.3728	6.92415
					-0.31982	16.4501	6.90887
					-0.316817	16.5275	6.89369
					-0.313814	16.6048	6.87862
					-0.310811	16.6822	6.86367
					-0.307808	16.7595	6.84882
					-0.304805	16.8369	6.83409
					-0.301802	16.9142	6.81947
					-0.298799	16.9916	6.80496
					-0.295796	17.069	6.79057
					-0.292793	17.1463	6.7763
					-0.28979	17.2237	6.76214
					-0.286787	17.301	6.74809
					-0.283784	17.3784	6.73417
					-0.280781	17.4557	6.72036
					-0.277778	17.5331	6.70667
					-0.274775	17.6104	6.6931
					-0.271772	17.6878	6.67966
					-0.268769	17.7651	6.66633
					-0.265766	17.8425	6.65312
					-0.262763	17.9199	6.64004
					-0.25976	17.9972	6.62708
					-0.256757	18.0746	6.61425
					-0.253754	18.1519	6.60153
					-0.250751	18.2293	6.58895
					-0.247748	18.3066	6.57649
					-0.244745	18.384	6.56416
					-0.241742	18.4613	6.55195
					-0.238739	18.5387	6.53988
					-0.235736	18.616	6.52793
					-0.232733	18.6934	6.51611
					-0.22973	18.7708	6.50442
					-0.226727	18.8481	6.49287
					-0.223724	18.9255	6.48144
					-0.220721	19.0028	6.47015
					-0.217718	19.0802	6.45899
					-0.214715	19.1575	6.44797
					-0.211712	19.2349	6.43708
					-0.208709	19.3122	6.42633
					-0.205706	19.3896	6.41571
					-0.202703	19.467	6.40522
					-0.1997	19.5443	6.39488
					-0.196697	19.6217	6.38467
					-0.193694	19.699	6.37461
					-0.190691	19.7764	6.36468
					-0.187688	19.8537	6.35489
					-0.184685	19.9311	6.34524
					-0.181682	20.0084	6.33573
					-0.178679	20.0858	6.32637
					-0.175676	20.1631	6.31715
					-0.172673	20.2405	6.30807
					-0.16967	20.3179	6.29913
					-0.166667	20.3952	6.29034
					-0.163664	20.4726	6.2817
					-0.160661	20.5499	6.2732
					-0.157658	20.6273	6.26484
					-0.154655	20.7046	6.25663
					-0.151652	20.782	6.24857
					-0.148649	20.8593	6.24066
					-0.145646	20.9367	6.2329
					-0.142643	21.0141	6.22529
					-0.13964	21.0914	6.21782
					-0.136637	21.1688	6.21051
					-0.133634	21.2461	6.20334
					-0.130631	21.3235	6.19633
					-0.127628	21.4008	6.18947
					-0.124625	21.4782	6.18276
					-0.121622	21.5555	6.1762
					-0.118619	21.6329	6.1698
					-0.115616	21.7102	6.16355
					-0.112613	21.7876	6.15745
					-0.10961	21.865	6.15151
					-0.106607	21.9423	6.14573
					-0.103604	22.0197	6.1401
					-0.100601	22.097	6.13462
					-0.0975976	22.1744	6.12931
					-0.0945946	22.2517	6.12415
					-0.0915916	22.3291	6.11914
					-0.0885886	22.4064	6.1143
					-0.0855856	22.4838	6.10961
					-0.0825826	22.5611	6.10508
					-0.0795796	22.6385	6.1007
					-0.0765766	22.7159	6.09649
					-0.0735736	22.7932	6.09244
					-0.0705706	22.8706	6.08854
					-0.0675676	22.9479	6.08481
					-0.0645646	23.0253	6.08124
					-0.0615616	23.1026	6.07782
					-0.0585586	23.18	6.07457
					-0.0555556	23.2573	6.07148
					-0.0525526	23.3347	6.06855
					-0.0495495	23.4121	6.06578
					-0.0465465	23.4894	6.06317
					-0.0435435	23.5668	6.06073
					-0.0405405	23.6441	6.05845
					-0.0375375	23.7215	6.05633
					-0.0345345	23.7988	6.05437
					-0.0315315	23.8762	6.05257
					-0.0285285	23.9535	6.05094
					-0.0255255	24.0309	6.04947
					-0.0225225	24.1082	6.04816
					-0.0195195	24.1856	6.04702
					-0.0165165	24.263	6.04604
					-0.0135135	24.3403	6.04522
					-0.0105105	24.4177	6.04457
					-0.00750751	24.495	6.04408
					-0.0045045	24.5724	6.04375
					-0.0015015	24.6497	6.04359
					0.0015015	24.7271	6.04359
					0.0045045	24.8044	6.04375
					0.00750751	24.8818	6.04408
					0.0105105	24.9592	6.04457
					0.0135135	25.0365	6.04522
					0.0165165	25.1139	6.04604
					0.0195195	25.1912	6.04702
					0.0225225	25.2686	6.04816
					0.0255255	25.3459	6.04947
					0.0285285	25.4233	6.05094
					0.0315315	25.5006	6.05257
					0.0345345	25.578	6.05437
					0.0375375	25.6553	6.05633
					0.0405405	25.7327	6.05845
					0.0435435	25.8101	6.06073
					0.0465465	25.8874	6.06317
					0.0495495	25.9648	6.06578
					0.0525526	26.0421	6.06855
					0.0555556	26.1195	6.07148
					0.0585586	26.1968	6.07457
					0.0615616	26.2742	6.07782
					0.0645646	26.3515	6.08124
					0.0675676	26.4289	6.08481
					0.0705706	26.5062	6.08854
					0.0735736	26.5836	6.09244
					0.0765766	26.661	6.09649
					0.0795796	26.7383	6.1007
					0.0825826	26.8157	6.10508
					0.0855856	26.893	6.10961
					0.0885886	26.9704	6.1143
					0.0915916	27.0477	6.11914
					0.0945946	27.1251	6.12415
					0.0975976	27.2024	6.12931
					0.100601	27.2798	6.13462
					0.103604	27.3572	6.1401
					0.106607	27.4345	6.14573
					0.10961	27.5119	6.15151
					0.112613	27.5892	6.15745
					0.115616	27.6666	6.16355
					0.118619	27.7439	6.1698
					0.121622	27.8213	6.1762
					0.124625	27.8986	6.18276
					0.127628	27.976	6.18947
					0.130631	28.0533	6.19633
					0.133634	28.1307	6.20334
					0.136637	28.2081	6.21051
					0.13964	28.2854	6.21782
					0.142643	28.3628	6.22529
					0.145646	28.4401	6.2329
					0.148649	28.5175	6.24066
					0.151652	28.5948	6.24857
					0.154655	28.6722	6.25663
					0.157658	28.7495	6.26484
					0.160661	28.8269	6.2732
					0.163664	28.9043	6.2817
					0.166667	28.9816	6.29034
					0.16967	29.059	6.29913
					0.172673	29.1363	6.30807
					0.175676	29.2137	6.31715
					0.178679	29.291	6.32637
					0.181682	29.3684	6.33573
					0.184685	29.4457	6.34524
					0.187688	29.5231	6.35489
					0.190691	29.6004	6.36468
					0.193694	29.6778	6.37461
					0.196697	29.7552	6.38467
					0.1997	29.8325	6.39488
					0.202703	29.9099	6.40522
					0.205706	29.9872	6.41571
					0.208709	30.0646	6.42633
					0.211712	30.1419	6.43708
					0.214715	30.2193	6.44797
					0.217718	30.2966	6.45899
					0.220721	30.374	6.47015
					0.223724	30.4513	6.48144
					0.226727	30.5287	6.49287
					0.22973	30.6061	6.50442
					0.232733	30.6834	6.51611
					0.235736	30.7608	6.52793
					0.238739	30.8381	6.53988
					0.241742	30.9155	6.55195
					0.244745	30.9928	6.56416
					0.247748	31.0702	6.57649
					0.250751	31.1475	6.58895
					0.253754	31.2249	6.60153
					0.256757	31.3023	6.61425
					0.25976	31.3796	6.62708
					0.262763	31.457	6.64004
					0.265766	31.5343	6.65312
					0.268769	31.6117	6.66633
					0.271772	31.689	6.67966
					0.274775	31.7664	6.6931
					0.277778	31.8437	6.70667
					0.280781	31.9211	6.72036
					0.283784	31.9984	6.73417
					0.286787	32.0758	6.74809
					0.28979	32.1532	6.76214
					0.292793	32.2305	6.7763
					0.295796	32.3079	6.79057
					0.298799	32.3852	6.80496
					0.301802	32.4626	6.81947
					0.304805	32.5399	6.83409
					0.307808	32.6173	6.84882
					0.310811	32.6946	6.86367
					0.313814	32.772	6.87862
					0.316817	32.8493	6.89369
					0.31982	32.9267	6.90887
					0.322823	33.0041	6.92415
					0.325826	33.0814	6.93955
					0.328829	33.1588	6.95505
					0.331832	33.2361	6.97066
					0.334835	33.3135	6.98638
					0.337838	33.3908	7.0022
					0.340841	33.4682	7.01813
					0.343844	33.5455	7.03416
					0.346847	33.6229	7.0503
					0.34985	33.7003	7.06654
					0.352853	33.7776	7.08288
					0.355856	33.855	7.09932
					0.358859	33.9323	7.11587
					0.361862	34.0097	7.13251
					0.364865	34.087	7.14926
					0.367868	34.1644	7.1661
					0.370871	34.2417	7.18304
					0.373874	34.3191	7.20008
					0.376877	34.3964	7.21721
					0.37988	34.4738	7.23444
					0.382883	34.5512	7.25177
					0.385886	34.6285	7.26919
					0.388889	34.7059	7.2867
					0.391892	34.7832	7.30431
					0.394895	34.8606	7.32201
					0.397898	34.9379	7.33981
					0.400901	35.0153	7.35769
					0.403904	35.0926	7.37566
					0.406907	35.17	7.39373
					0.40991	35.2473	7.41188
					0.412913	35.3247	7.43012
					0.415916	35.4021	7.44845
					0.418919	35.4794	7.46687
					0.421922	35.5568	7.48538
					0.424925	35.6341	7.50397
					0.427928	35.7115	7.52264
					0.430931	35.7888	7.5414
					0.433934	35.8662	7.56025
					0.436937	35.9435	7.57917
					0.43994	36.0209	7.59819
					0.442943	36.0983	7.61728
					0.445946	36.1756	7.63645
					0.448949	36.253	7.65571
					0.451952	36.3303	7.67505
					0.454955	36.4077	7.69446
					0.457958	36.485	7.71396
					0.460961	36.5624	7.73353
					0.463964	36.6397	7.75318
					0.466967	36.7171	7.77291
					0.46997	36.7944	7.79272
					0.472973	36.8718	7.8126
					0.475976	36.9492	7.83256
					0.478979	37.0265	7.85259
					0.481982	37.1039	7.8727
					0.484985	37.1812	7.89288
					0.487988	37.2586	7.91314
					0.490991	37.3359	7.93347
					0.493994	37.4133	7.95387
					0.496997	37.4906	7.97434
					0.5	37.568	7.99489
					0.503003	37.6454	8.0155
					0.506006	37.7227	8.03618
					0.509009	37.8001	8.05694
					0.512012	37.8774	8.07776
					0.515015	37.9548	8.09865
					0.518018	38.0321	8.11961
					0.521021	38.1095	8.14064
					0.524024	38.1868	8.16173
					0.527027	38.2642	8.18289
					0.53003	38.3415	8.20412
					0.533033	38.4189	8.22541
					0.536036	38.4963	8.24676
					0.539039	38.5736	8.26818
					0.542042	38.651	8.28967
					0.545045	38.7283	8.31121
					0.548048	38.8057	8.33282
					0.551051	38.883	8.3545
					0.554054	38.9604	8.37623
					0.557057	39.0377	8.39803
					0.56006	39.1151	8.41989
					0.563063	39.1924	8.4418
					0.566066	39.2698	8.46378
					0.569069	39.3472	8.48582
					0.572072	39.4245	8.50791
					0.575075	39.5019	8.53007
					0.578078	39.5792	8.55228
					0.581081	39.6566	8.57455
					0.584084	39.7339	8.59688
					0.587087	39.8113	8.61926
					0.59009	39.8886	8.6417
					0.593093	39.966	8.6642
					0.596096	40.0433	8.68675
					0.599099	40.1207	8.70936
					0.602102	40.1981	8.73202
					0.605105	40.2754	8.75474
					0.608108	40.3528	8.77751
					0.611111	40.4301	8.80033
					0.614114	40.5075	8.82321
					0.617117	40.5848	8.84614
					0.62012	40.6622	8.86912
					0.623123	40.7395	8.89215
					0.626126	40.8169	8.91524
					0.629129	40.8943	8.93837
					0.632132	40.9716	8.96156
					0.635135	41.049	8.98479
					0.638138	41.1263	9.00808
					0.641141	41.2037	9.03141
					0.644144	41.281	9.0548
					0.647147	41.3584	9.07823
					0.65015	41.4357	9.10171
					0.653153	41.5131	9.12524
					0.656156	41.5904	9.14881
					0.659159	41.6678	9.17244
					0.662162	41.7452	9.19611
					0.665165	41.8225	9.21982
					0.668168	41.8999	9.24358
					0.671171	41.9772	9.26739
					0.674174	42.0546	9.29125
					0.677177	42.1319	9.31515
					0.68018	42.2093	9.33909
					0.683183	42.2866	9.36308
					0.686186	42.364	9.38711
					0.689189	42.4414	9.41118
					0.692192	42.5187	9.4353
					0.695195	42.5961	9.45946
					0.698198	42.6734	9.48367
					0.701201	42.7508	9.50791
					0.704204	42.8281	9.5322
					0.707207	42.9055	9.55653
					0.71021	42.9828	9.5809
					0.713213	43.0602	9.60531
					0.716216	43.1375	9.62977
					0.719219	43.2149	9.65426
					0.722222	43.2923	9.67879
					0.725225	43.3696	9.70337
					0.728228	43.447	9.72798
					0.731231	43.5243	9.75263
					0.734234	43.6017	9.77732
					0.737237	43.679	9.80205
					0.74024	43.7564	9.82682
					0.743243	43.8337	9.85163
					0.746246	43.9111	9.87647
					0.749249	43.9885	9.90135
					0.752252	44.0658	9.92627
					0.755255	44.1432	9.95122
					0.758258	44.2205	9.97622
					0.761261	44.2979	10.0012
					0.764264	44.3752	10.0263
					0.767267	44.4526	10.0514
					0.77027	44.5299	10.0765
					0.773273	44.6073	10.1017
					0.776276	44.6846	10.1269
					0.779279	44.762	10.1522
					0.782282	44.8394	10.1774
					0.785285	44.9167	10.2027
					0.788288	44.9941	10.2281
					0.791291	45.0714	10.2535
					0.794294	45.1488	10.2789
					0.797297	45.2261	10.3043
					0.8003	45.3035	10.3298
					0.803303	45.3808	10.3553
					0.806306	45.4582	10.3808
					0.809309	45.5356	10.4064
					0.812312	45.6129	10.432
					0.815315	45.6903	10.4577
					0.818318	45.7676	10.4833
					0.821321	45.845	10.509
					0.824324	45.9223	10.5348
					0.827327	45.9997	10.5605
					0.83033	46.077	10.5863
					0.833333	46.1544	10.6122
					0.836336	46.2317	10.638
					0.839339	46.3091	10.6639
					0.842342	46.3865	10.6898
					0.845345	46.4638	10.7157
					0.848348	46.5412	10.7417
					0.851351	46.6185	10.7677
					0.854354	46.6959	10.7938
					0.857357	46.7732	10.8198
					0.86036	46.8506	10.8459
					0.863363	46.9279	10.872
					0.866366	47.0053	10.8982
					0.869369	47.0826	10.9243
					0.872372	47.16	10.9505
					0.875375	47.2374	10.9768
					0.878378	47.3147	11.003
					0.881381	47.3921	11.0293
					0.884384	47.4694	11.0556
					0.887387	47.5468	11.0819
					0.89039	47.6241	11.1083
					0.893393	47.7015	11.1347
					0.896396	47.7788	11.1611
					0.899399	47.8562	11.1875
					0.902402	47.9335	11.214
					0.905405	48.0109	11.2405
					0.908408	48.0883	11.267
					0.911411	48.1656	11.2936
					0.914414	48.243	11.3201
					0.917417	48.3203	11.3467
					0.92042	48.3977	11.3733
					0.923423	48.475	11.4
					0.926426	48.5524	11.4267
					0.929429	48.6297	11.4533
					0.932432	48.7071	11.4801
					0.935435	48.7845	11.5068
					0.938438	48.8618	11.5336
					0.941441	48.9392	11.5603
					0.944444	49.0165	11.5871
					0.947447	49.0939	11.614
					0.95045	49.1712	11.6408
					0.953453	49.2486	11.6677
					0.956457	49.3259	11.6946
					0.95946	49.4033	11.7215
					0.962462	49.4806	11.7485
					0.965465	49.558	11.7754
					0.968468	49.6354	11.8024
					0.971472	49.7127	11.8295
					0.974475	49.7901	11.8565
					0.977477	49.8674	11.8835
					0.98048	49.9448	11.9106
					0.983483	50.0221	11.9377
					0.986487	50.0995	11.9648
					0.98949	50.1768	11.992
					0.992492	50.2542	12.0191
					0.995495	50.3316	12.0463
					0.998498	50.4089	12.0735
					1.0015	50.4863	12.1007
					1.0045	50.5636	12.128
					1.00751	50.641	12.1553
					1.01051	50.7183	12.1825
					1.01351	50.7957	12.2098
					1.01652	50.873	12.2372
					1.01952	50.9504	12.2645
					1.02252	51.0277	12.2919
					1.02553	51.1051	12.3193
					1.02853	51.1825	12.3467
					1.03153	51.2598	12.3741
					1.03453	51.3372	12.4015
					1.03754	51.4145	12.429
					1.04054	51.4919	12.4565
					1.04354	51.5692	12.4839
					1.04655	51.6466	12.5115
					1.04955	51.7239	12.539
					1.05255	51.8013	12.5665
					1.05556	51.8787	12.5941
					1.05856	51.956	12.6217
					1.06156	52.0334	12.6493
					1.06456	52.1107	12.6769
					1.06757	52.1881	12.7046
					1.07057	52.2654	12.7322
					1.07357	52.3428	12.7599
					1.07658	52.4201	12.7876
					1.07958	52.4975	12.8153
					1.08258	52.5748	12.843
					1.08559	52.6522	12.8708
					1.08859	52.7296	12.8986
					1.09159	52.8069	12.9263
					1.09459	52.8843	12.9541
					1.0976	52.9616	12.9819
					1.1006	53.039	13.0098
					1.1036	53.1163	13.0376
					1.10661	53.1937	13.0655
					1.10961	53.271	13.0934
					1.11261	53.3484	13.1212
					1.11562	53.4257	13.1492
					1.11862	53.5031	13.1771
					1.12162	53.5805	13.205
					1.12462	53.6578	13.233
					1.12763	53.7352	13.261
					1.13063	53.8125	13.2889
					1.13363	53.8899	13.3169
					1.13664	53.9672	13.345
					1.13964	54.0446	13.373
					1.14264	54.1219	13.401
					1.14565	54.1993	13.4291
					1.14865	54.2766	13.4572
					1.15165	54.354	13.4853
					1.15465	54.4314	13.5134
					1.15766	54.5087	13.5415
					1.16066	54.5861	13.5697
					1.16366	54.6634	13.5978
					1.16667	54.7408	13.626
					1.16967	54.8181	13.6542
					1.17267	54.8955	13.6823
					1.17568	54.9728	13.7106
					1.17868	55.0502	13.7388
					1.18168	55.1276	13.767
					1.18468	55.2049	13.7953
					1.18769	55.2823	13.8235
					1.19069	55.3596	13.8518
					1.19369	55.437	13.8801
					1.1967	55.5143	13.9084
					1.1997	55.5917	13.9367
					1.2027	55.669	13.9651
					1.20571	55.7464	13.9934
					1.20871	55.8237	14.0218
					1.21171	55.9011	14.0501
					1.21471	55.9785	14.0785
					1.21772	56.0558	14.1069
					1.22072	56.1332	14.1353
					1.22372	56.2105	14.1637
					1.22673	56.2879	14.1922
					1.22973	56.3652	14.2206
					1.23273	56.4426	14.2491
					1.23574	56.5199	14.2776
					1.23874	56.5973	14.3061
					1.24174	56.6747	14.3346
					1.24474	56.752	14.3631
					1.24775	56.8294	14.3916
					1.25075	56.9067	14.4201
					1.25375	56.9841	14.4487
					1.25676	57.0614	14.4772
					1.25976	57.1388	14.5058
					1.26276	57.2161	14.5344
					1.26577	57.2935	14.563
					1.26877	57.3708	14.5916
					1.27177	57.4482	14.6202
					1.27477	57.5256	14.6488
					1.27778	57.6029	14.6775
					1.28078	57.6803	14.7061
					1.28378	57.7576	14.7348
					1.28679	57.835	14.7635
					1.28979	57.9123	14.7921
					1.29279	57.9897	14.8208
					1.2958	58.067	14.8495
					1.2988	58.1444	14.8783
					1.3018	58.2218	14.907
					1.3048	58.2991	14.9357
					1.30781	58.3765	14.9645
					1.31081	58.4538	14.9932
					1.31381	58.5312	15.022
					1.31682	58.6085	15.0508
					1.31982	58.6859	15.0796
					1.32282	58.7632	15.1084
					1.32583	58.8406	15.1372
					1.32883	58.9179	15.166
					1.33183	58.9953	15.1949
					1.33483	59.0727	15.2237
					1.33784	59.15	15.2526
					1.34084	59.2274	15.2815
					1.34384	59.3047	15.3103
					1.34685	59.3821	15.3392
					1.34985	59.4594	15.3681
					1.35285	59.5368	15.397
					1.35586	59.6141	15.4259
					1.35886	59.6915	15.4549
					1.36186	59.7689	15.4838
					1.36486	59.8462	15.5127
					1.36787	59.9236	15.5417
					1.37087	60.0009	15.5707
					1.37387	60.0783	15.5996
					1.37688	60.1556	15.6286
					1.37988	60.233	15.6576
					1.38288	60.3103	15.6866
					1.38589	60.3877	15.7156
					1.38889	60.465	15.7447
					1.39189	60.5424	15.7737
					1.39489	60.6198	15.8027
					1.3979	60.6971	15.8318
					1.4009	60.7745	15.8608
					1.4039	60.8518	15.8899
					1.40691	60.9292	15.919
					1.40991	61.0065	15.9481
					1.41291	61.0839	15.9772
					1.41592	61.1612	16.0063
					1.41892	61.2386	16.0354
					1.42192	61.3159	16.0645
					1.42492	61.3933	16.0936
					1.42793	61.4707	16.1228
					1.43093	61.548	16.1519
					1.43393	61.6254	16.1811
					1.43694	61.7027	16.2102
					1.43994	61.7801	16.2394
					1.44294	61.8574	16.2686
					1.44595	61.9348	16.2978
					1.44895	62.0121	16.327
					1.45195	62.0895	16.3562
					1.45495	62.1668	16.3854
					1.45796	62.2442	16.4146
					1.46096	62.3216	16.4439
					1.46396	62.3989	16.4731
					1.46697	62.4763	16.5023
					1.46997	62.5536	16.5316
					1.47297	62.631	16.5609
					1.47598	62.7083	16.5901
					1.47898	62.7857	16.6194
					1.48198	62.863	16.6487
					1.48498	62.9404	16.678
					1.48799	63.0178	16.7073
					1.49099	63.0951	16.7366
					1.49399	63.1725	16.7659
					1.497	63.2498	16.7952
					1.5	63.3272	16.8246

## Sheet: Fig.S4i
scatter point	individual engagement score	distractor bias (ms)		fitted curve	individual engagement score	distractor bias (ms)	errorbar
	-1	33.6429			-1.5	14.1968	11.5807
	-1	11.95			-1.497	14.2179	11.5646
	-1	49.6591			-1.49399	14.2389	11.5486
	-1	38.2619			-1.49099	14.2599	11.5326
	-1	69.1346			-1.48799	14.2809	11.5165
	-1	79.4444			-1.48498	14.3019	11.5005
	-1	86.8333			-1.48198	14.3229	11.4845
	-1	86.6889			-1.47898	14.3439	11.4685
	-1	85.9565			-1.47598	14.3649	11.4526
	-1	79.7241			-1.47297	14.3859	11.4366
	-1	81.1739			-1.46997	14.4069	11.4207
	-1	78.9688			-1.46697	14.4279	11.4047
	1	64.7143			-1.46396	14.4489	11.3888
	1	45.5714			-1.46096	14.4699	11.3728
	1	57.1316			-1.45796	14.4909	11.3569
	1	64.4571			-1.45495	14.5119	11.341
	1	70.5			-1.45195	14.5329	11.3251
	1	97.5532			-1.44895	14.5539	11.3093
	1	77.0286			-1.44595	14.5749	11.2934
	1	94.5641			-1.44294	14.5959	11.2775
	1	85.0816			-1.43994	14.6169	11.2617
	1	86.5333			-1.43694	14.6379	11.2458
	1	109.727			-1.43393	14.6589	11.23
	1	76.375			-1.43093	14.6799	11.2142
	1	40.4103			-1.42793	14.7009	11.1984
	1	26.2453			-1.42492	14.7219	11.1826
	1	62.8235			-1.42192	14.743	11.1668
	1	71.4865			-1.41892	14.764	11.151
	1	64.4364			-1.41592	14.785	11.1353
	1	85.5833			-1.41291	14.806	11.1195
	1	62.3421			-1.40991	14.827	11.1038
	1	89			-1.40691	14.848	11.088
	1	107.143			-1.4039	14.869	11.0723
	1	119.458			-1.4009	14.89	11.0566
	1	45.7692			-1.3979	14.911	11.0409
	1	102.5			-1.39489	14.932	11.0252
	1	35.8036			-1.39189	14.953	11.0096
	1	64.2321			-1.38889	14.974	10.9939
	1	59.3509			-1.38589	14.995	10.9783
	1	58.8286			-1.38288	15.016	10.9626
	1	22.3284			-1.37988	15.037	10.947
	1	42.5972			-1.37688	15.058	10.9314
	1	50.1364			-1.37387	15.079	10.9158
	1	63.4792			-1.37087	15.1	10.9002
	1	47.1045			-1.36787	15.121	10.8846
	1	24.3571			-1.36486	15.142	10.869
	1	33.16			-1.36186	15.163	10.8535
	1	40.6889			-1.35886	15.184	10.8379
	-1	19.6182			-1.35586	15.205	10.8224
	-1	31.2456			-1.35285	15.226	10.8069
	-1	31.6721			-1.34985	15.2471	10.7914
	-1	54.75			-1.34685	15.2681	10.7759
	-1	12.1452			-1.34384	15.2891	10.7604
	-1	-2.15789			-1.34084	15.3101	10.7449
	-1	19.037			-1.33784	15.3311	10.7295
	-1	9.97872			-1.33483	15.3521	10.714
	-1	38.6522			-1.33183	15.3731	10.6986
	-1	23.6765			-1.32883	15.3941	10.6832
	-1	6.42857			-1.32583	15.4151	10.6678
	-1	31.6042			-1.32282	15.4361	10.6524
	-1	63.5345			-1.31982	15.4571	10.637
	-1	64.1148			-1.31682	15.4781	10.6216
	-1	55.9828			-1.31381	15.4991	10.6063
	-1	54.0667			-1.31081	15.5201	10.5909
	-1	65.3824			-1.30781	15.5411	10.5756
	-1	64.44			-1.3048	15.5621	10.5603
	-1	71.4615			-1.3018	15.5831	10.545
	-1	39.7551			-1.2988	15.6041	10.5297
	-1	48.3651			-1.2958	15.6251	10.5144
	-1	54.9394			-1.29279	15.6461	10.4991
	-1	36.4286			-1.28979	15.6671	10.4839
	-1	55.9773			-1.28679	15.6881	10.4687
	-1	5.46667			-1.28378	15.7091	10.4534
	-1	-27.1667			-1.28078	15.7301	10.4382
	-1	-7.33929			-1.27778	15.7512	10.423
	-1	-8.18605			-1.27477	15.7722	10.4078
	-1	-4.57627			-1.27177	15.7932	10.3927
	-1	5.65			-1.26877	15.8142	10.3775
	-1	3.40625			-1.26577	15.8352	10.3624
	-1	-2.58974			-1.26276	15.8562	10.3472
	-1	37.25			-1.25976	15.8772	10.3321
	-1	1.84211			-1.25676	15.8982	10.317
	-1	4.39535			-1.25375	15.9192	10.3019
	-1	13.5484			-1.25075	15.9402	10.2869
	1	10.8605			-1.24775	15.9612	10.2718
	1	-17.7679			-1.24474	15.9822	10.2567
	1	-7.38182			-1.24174	16.0032	10.2417
	1	-1.25			-1.23874	16.0242	10.2267
	1	2.85965			-1.23574	16.0452	10.2117
	1	-3.27273			-1.23273	16.0662	10.1967
	1	-4.32258			-1.22973	16.0872	10.1817
	1	-16.225			-1.22673	16.1082	10.1668
	1	5.46154			-1.22372	16.1292	10.1518
	1	-12.3125			-1.22072	16.1502	10.1369
	1	9.65306			-1.21772	16.1712	10.122
	1	-18.5556			-1.21471	16.1922	10.1071
	1	19.6905			-1.21171	16.2132	10.0922
	1	0.188679			-1.20871	16.2342	10.0773
	1	2.92727			-1.20571	16.2553	10.0625
	1	16.8372			-1.2027	16.2763	10.0476
	1	8.40323			-1.1997	16.2973	10.0328
	1	22.5862			-1.1967	16.3183	10.018
	1	10.3438			-1.19369	16.3393	10.0032
	1	15.7179			-1.19069	16.3603	9.98842
	1	9.16667			-1.18769	16.3813	9.97366
	1	-14.825			-1.18468	16.4023	9.95891
	1	8.4			-1.18168	16.4233	9.94417
	1	26.3077			-1.17868	16.4443	9.92946
	-1	-61.5			-1.17568	16.4653	9.91475
	-1	-64.4062			-1.17267	16.4863	9.90007
	-1	-41.3778			-1.16967	16.5073	9.8854
	-1	-20.1633			-1.16667	16.5283	9.87074
	-1	-22.2698			-1.16366	16.5493	9.8561
	-1	-23.7385			-1.16066	16.5703	9.84148
	-1	-26.5686			-1.15766	16.5913	9.82687
	-1	-26.9804			-1.15465	16.6123	9.81228
	-1	-5.98148			-1.15165	16.6333	9.79771
	-1	-0.0571429			-1.14865	16.6543	9.78315
	-1	-12.1579			-1.14565	16.6753	9.76861
	-1	-16.1111			-1.14264	16.6963	9.75409
	1	-32.2128			-1.13964	16.7173	9.73958
	1	-26.2586			-1.13664	16.7383	9.72509
	1	-6.97619			-1.13363	16.7594	9.71061
	1	-17.8298			-1.13063	16.7804	9.69615
	1	15.129			-1.12763	16.8014	9.68171
	1	0.344262			-1.12462	16.8224	9.66729
	1	-15.1373			-1.12162	16.8434	9.65288
	1	-18.617			-1.11862	16.8644	9.63849
	1	-8.39583			-1.11562	16.8854	9.62412
	1	-18.5806			-1.11261	16.9064	9.60976
	1	-0.84127			-1.10961	16.9274	9.59542
	1	-11.4565			-1.10661	16.9484	9.5811
	-1	-56.4			-1.1036	16.9694	9.5668
	-1	-21.9818			-1.1006	16.9904	9.55251
	-1	-26.5319			-1.0976	17.0114	9.53824
	-1	-27.2			-1.09459	17.0324	9.52399
	-1	-3.2069			-1.09159	17.0534	9.50976
	-1	-6.10606			-1.08859	17.0744	9.49554
	-1	-8.30769			-1.08559	17.0954	9.48134
	-1	-1.86			-1.08258	17.1164	9.46717
	-1	-8.55769			-1.07958	17.1374	9.453
	-1	19.2857			-1.07658	17.1584	9.43886
	-1	-19.6441			-1.07357	17.1794	9.42474
	-1	1.55556			-1.07057	17.2004	9.41063
					-1.06757	17.2214	9.39654
					-1.06456	17.2424	9.38247
					-1.06156	17.2634	9.36842
					-1.05856	17.2845	9.35439
					-1.05556	17.3055	9.34038
					-1.05255	17.3265	9.32638
					-1.04955	17.3475	9.31241
					-1.04655	17.3685	9.29845
					-1.04354	17.3895	9.28451
					-1.04054	17.4105	9.27059
					-1.03754	17.4315	9.25669
					-1.03453	17.4525	9.24281
					-1.03153	17.4735	9.22895
					-1.02853	17.4945	9.21511
					-1.02553	17.5155	9.20129
					-1.02252	17.5365	9.18749
					-1.01952	17.5575	9.17371
					-1.01652	17.5785	9.15995
					-1.01351	17.5995	9.14621
					-1.01051	17.6205	9.13248
					-1.00751	17.6415	9.11878
					-1.0045	17.6625	9.1051
					-1.0015	17.6835	9.09144
					-0.998498	17.7045	9.0778
					-0.995495	17.7255	9.06418
					-0.992492	17.7465	9.05058
					-0.98949	17.7675	9.037
					-0.986487	17.7886	9.02344
					-0.983483	17.8096	9.0099
					-0.98048	17.8306	8.99639
					-0.977477	17.8516	8.98289
					-0.974475	17.8726	8.96942
					-0.971472	17.8936	8.95597
					-0.968468	17.9146	8.94254
					-0.965465	17.9356	8.92913
					-0.962462	17.9566	8.91574
					-0.95946	17.9776	8.90237
					-0.956457	17.9986	8.88903
					-0.953453	18.0196	8.87571
					-0.95045	18.0406	8.86241
					-0.947447	18.0616	8.84913
					-0.944444	18.0826	8.83587
					-0.941441	18.1036	8.82264
					-0.938438	18.1246	8.80942
					-0.935435	18.1456	8.79623
					-0.932432	18.1666	8.78307
					-0.929429	18.1876	8.76992
					-0.926426	18.2086	8.7568
					-0.923423	18.2296	8.7437
					-0.92042	18.2506	8.73063
					-0.917417	18.2716	8.71758
					-0.914414	18.2926	8.70454
					-0.911411	18.3137	8.69154
					-0.908408	18.3347	8.67856
					-0.905405	18.3557	8.6656
					-0.902402	18.3767	8.65266
					-0.899399	18.3977	8.63975
					-0.896396	18.4187	8.62686
					-0.893393	18.4397	8.614
					-0.89039	18.4607	8.60116
					-0.887387	18.4817	8.58834
					-0.884384	18.5027	8.57555
					-0.881381	18.5237	8.56278
					-0.878378	18.5447	8.55004
					-0.875375	18.5657	8.53732
					-0.872372	18.5867	8.52463
					-0.869369	18.6077	8.51196
					-0.866366	18.6287	8.49931
					-0.863363	18.6497	8.48669
					-0.86036	18.6707	8.4741
					-0.857357	18.6917	8.46153
					-0.854354	18.7127	8.44899
					-0.851351	18.7337	8.43647
					-0.848348	18.7547	8.42398
					-0.845345	18.7757	8.41151
					-0.842342	18.7967	8.39907
					-0.839339	18.8178	8.38666
					-0.836336	18.8388	8.37427
					-0.833333	18.8598	8.36191
					-0.83033	18.8808	8.34957
					-0.827327	18.9018	8.33726
					-0.824324	18.9228	8.32498
					-0.821321	18.9438	8.31272
					-0.818318	18.9648	8.30049
					-0.815315	18.9858	8.28828
					-0.812312	19.0068	8.27611
					-0.809309	19.0278	8.26396
					-0.806306	19.0488	8.25184
					-0.803303	19.0698	8.23974
					-0.8003	19.0908	8.22767
					-0.797297	19.1118	8.21564
					-0.794294	19.1328	8.20362
					-0.791291	19.1538	8.19164
					-0.788288	19.1748	8.17968
					-0.785285	19.1958	8.16775
					-0.782282	19.2168	8.15585
					-0.779279	19.2378	8.14398
					-0.776276	19.2588	8.13214
					-0.773273	19.2798	8.12032
					-0.77027	19.3008	8.10854
					-0.767267	19.3219	8.09678
					-0.764264	19.3429	8.08505
					-0.761261	19.3639	8.07335
					-0.758258	19.3849	8.06168
					-0.755255	19.4059	8.05004
					-0.752252	19.4269	8.03843
					-0.749249	19.4479	8.02685
					-0.746246	19.4689	8.0153
					-0.743243	19.4899	8.00377
					-0.74024	19.5109	7.99228
					-0.737237	19.5319	7.98082
					-0.734234	19.5529	7.96939
					-0.731231	19.5739	7.95799
					-0.728228	19.5949	7.94662
					-0.725225	19.6159	7.93527
					-0.722222	19.6369	7.92396
					-0.719219	19.6579	7.91269
					-0.716216	19.6789	7.90144
					-0.713213	19.6999	7.89022
					-0.71021	19.7209	7.87904
					-0.707207	19.7419	7.86788
					-0.704204	19.7629	7.85676
					-0.701201	19.7839	7.84567
					-0.698198	19.8049	7.83461
					-0.695195	19.826	7.82358
					-0.692192	19.847	7.81259
					-0.689189	19.868	7.80162
					-0.686186	19.889	7.79069
					-0.683183	19.91	7.77979
					-0.68018	19.931	7.76893
					-0.677177	19.952	7.75809
					-0.674174	19.973	7.74729
					-0.671171	19.994	7.73653
					-0.668168	20.015	7.72579
					-0.665165	20.036	7.71509
					-0.662162	20.057	7.70443
					-0.659159	20.078	7.69379
					-0.656156	20.099	7.68319
					-0.653153	20.12	7.67263
					-0.65015	20.141	7.66209
					-0.647147	20.162	7.6516
					-0.644144	20.183	7.64113
					-0.641141	20.204	7.6307
					-0.638138	20.225	7.62031
					-0.635135	20.246	7.60995
					-0.632132	20.267	7.59962
					-0.629129	20.288	7.58934
					-0.626126	20.309	7.57908
					-0.623123	20.3301	7.56886
					-0.62012	20.3511	7.55868
					-0.617117	20.3721	7.54853
					-0.614114	20.3931	7.53841
					-0.611111	20.4141	7.52834
					-0.608108	20.4351	7.5183
					-0.605105	20.4561	7.50829
					-0.602102	20.4771	7.49832
					-0.599099	20.4981	7.48839
					-0.596096	20.5191	7.47849
					-0.593093	20.5401	7.46864
					-0.59009	20.5611	7.45881
					-0.587087	20.5821	7.44903
					-0.584084	20.6031	7.43928
					-0.581081	20.6241	7.42957
					-0.578078	20.6451	7.4199
					-0.575075	20.6661	7.41026
					-0.572072	20.6871	7.40066
					-0.569069	20.7081	7.3911
					-0.566066	20.7291	7.38158
					-0.563063	20.7501	7.3721
					-0.56006	20.7711	7.36265
					-0.557057	20.7921	7.35325
					-0.554054	20.8131	7.34388
					-0.551051	20.8342	7.33455
					-0.548048	20.8552	7.32526
					-0.545045	20.8762	7.316
					-0.542042	20.8972	7.30679
					-0.539039	20.9182	7.29762
					-0.536036	20.9392	7.28849
					-0.533033	20.9602	7.27939
					-0.53003	20.9812	7.27034
					-0.527027	21.0022	7.26132
					-0.524024	21.0232	7.25235
					-0.521021	21.0442	7.24342
					-0.518018	21.0652	7.23452
					-0.515015	21.0862	7.22567
					-0.512012	21.1072	7.21686
					-0.509009	21.1282	7.20809
					-0.506006	21.1492	7.19936
					-0.503003	21.1702	7.19067
					-0.5	21.1912	7.18202
					-0.496997	21.2122	7.17341
					-0.493994	21.2332	7.16485
					-0.490991	21.2542	7.15633
					-0.487988	21.2752	7.14785
					-0.484985	21.2962	7.13941
					-0.481982	21.3172	7.13101
					-0.478979	21.3382	7.12265
					-0.475976	21.3593	7.11434
					-0.472973	21.3803	7.10607
					-0.46997	21.4013	7.09785
					-0.466967	21.4223	7.08966
					-0.463964	21.4433	7.08152
					-0.460961	21.4643	7.07343
					-0.457958	21.4853	7.06537
					-0.454955	21.5063	7.05736
					-0.451952	21.5273	7.04939
					-0.448949	21.5483	7.04147
					-0.445946	21.5693	7.03359
					-0.442943	21.5903	7.02576
					-0.43994	21.6113	7.01797
					-0.436937	21.6323	7.01022
					-0.433934	21.6533	7.00252
					-0.430931	21.6743	6.99486
					-0.427928	21.6953	6.98725
					-0.424925	21.7163	6.97969
					-0.421922	21.7373	6.97216
					-0.418919	21.7583	6.96469
					-0.415916	21.7793	6.95726
					-0.412913	21.8003	6.94987
					-0.40991	21.8213	6.94253
					-0.406907	21.8423	6.93524
					-0.403904	21.8634	6.92799
					-0.400901	21.8844	6.92079
					-0.397898	21.9054	6.91363
					-0.394895	21.9264	6.90653
					-0.391892	21.9474	6.89946
					-0.388889	21.9684	6.89245
					-0.385886	21.9894	6.88548
					-0.382883	22.0104	6.87856
					-0.37988	22.0314	6.87168
					-0.376877	22.0524	6.86486
					-0.373874	22.0734	6.85808
					-0.370871	22.0944	6.85135
					-0.367868	22.1154	6.84466
					-0.364865	22.1364	6.83803
					-0.361862	22.1574	6.83144
					-0.358859	22.1784	6.8249
					-0.355856	22.1994	6.81841
					-0.352853	22.2204	6.81196
					-0.34985	22.2414	6.80557
					-0.346847	22.2624	6.79922
					-0.343844	22.2834	6.79293
					-0.340841	22.3044	6.78668
					-0.337838	22.3254	6.78048
					-0.334835	22.3464	6.77433
					-0.331832	22.3675	6.76823
					-0.328829	22.3885	6.76218
					-0.325826	22.4095	6.75618
					-0.322823	22.4305	6.75023
					-0.31982	22.4515	6.74432
					-0.316817	22.4725	6.73847
					-0.313814	22.4935	6.73267
					-0.310811	22.5145	6.72692
					-0.307808	22.5355	6.72122
					-0.304805	22.5565	6.71557
					-0.301802	22.5775	6.70997
					-0.298799	22.5985	6.70442
					-0.295796	22.6195	6.69893
					-0.292793	22.6405	6.69348
					-0.28979	22.6615	6.68809
					-0.286787	22.6825	6.68274
					-0.283784	22.7035	6.67745
					-0.280781	22.7245	6.67221
					-0.277778	22.7455	6.66702
					-0.274775	22.7665	6.66188
					-0.271772	22.7875	6.6568
					-0.268769	22.8085	6.65177
					-0.265766	22.8295	6.64678
					-0.262763	22.8505	6.64186
					-0.25976	22.8715	6.63698
					-0.256757	22.8926	6.63216
					-0.253754	22.9136	6.62738
					-0.250751	22.9346	6.62267
					-0.247748	22.9556	6.618
					-0.244745	22.9766	6.61339
					-0.241742	22.9976	6.60883
					-0.238739	23.0186	6.60432
					-0.235736	23.0396	6.59987
					-0.232733	23.0606	6.59547
					-0.22973	23.0816	6.59112
					-0.226727	23.1026	6.58683
					-0.223724	23.1236	6.58259
					-0.220721	23.1446	6.57841
					-0.217718	23.1656	6.57428
					-0.214715	23.1866	6.5702
					-0.211712	23.2076	6.56618
					-0.208709	23.2286	6.56221
					-0.205706	23.2496	6.5583
					-0.202703	23.2706	6.55444
					-0.1997	23.2916	6.55063
					-0.196697	23.3126	6.54688
					-0.193694	23.3336	6.54319
					-0.190691	23.3546	6.53954
					-0.187688	23.3757	6.53596
					-0.184685	23.3967	6.53243
					-0.181682	23.4177	6.52895
					-0.178679	23.4387	6.52553
					-0.175676	23.4597	6.52217
					-0.172673	23.4807	6.51886
					-0.16967	23.5017	6.5156
					-0.166667	23.5227	6.5124
					-0.163664	23.5437	6.50926
					-0.160661	23.5647	6.50617
					-0.157658	23.5857	6.50314
					-0.154655	23.6067	6.50016
					-0.151652	23.6277	6.49724
					-0.148649	23.6487	6.49438
					-0.145646	23.6697	6.49157
					-0.142643	23.6907	6.48882
					-0.13964	23.7117	6.48612
					-0.136637	23.7327	6.48348
					-0.133634	23.7537	6.4809
					-0.130631	23.7747	6.47837
					-0.127628	23.7957	6.4759
					-0.124625	23.8167	6.47349
					-0.121622	23.8377	6.47113
					-0.118619	23.8587	6.46883
					-0.115616	23.8798	6.46658
					-0.112613	23.9008	6.4644
					-0.10961	23.9218	6.46227
					-0.106607	23.9428	6.46019
					-0.103604	23.9638	6.45818
					-0.100601	23.9848	6.45622
					-0.0975976	24.0058	6.45432
					-0.0945946	24.0268	6.45247
					-0.0915916	24.0478	6.45068
					-0.0885886	24.0688	6.44895
					-0.0855856	24.0898	6.44728
					-0.0825826	24.1108	6.44566
					-0.0795796	24.1318	6.4441
					-0.0765766	24.1528	6.4426
					-0.0735736	24.1738	6.44116
					-0.0705706	24.1948	6.43977
					-0.0675676	24.2158	6.43844
					-0.0645646	24.2368	6.43717
					-0.0615616	24.2578	6.43595
					-0.0585586	24.2788	6.4348
					-0.0555556	24.2998	6.4337
					-0.0525526	24.3208	6.43266
					-0.0495495	24.3418	6.43167
					-0.0465465	24.3628	6.43075
					-0.0435435	24.3838	6.42988
					-0.0405405	24.4049	6.42907
					-0.0375375	24.4259	6.42832
					-0.0345345	24.4469	6.42762
					-0.0315315	24.4679	6.42699
					-0.0285285	24.4889	6.42641
					-0.0255255	24.5099	6.42589
					-0.0225225	24.5309	6.42542
					-0.0195195	24.5519	6.42502
					-0.0165165	24.5729	6.42467
					-0.0135135	24.5939	6.42438
					-0.0105105	24.6149	6.42415
					-0.00750751	24.6359	6.42397
					-0.0045045	24.6569	6.42386
					-0.0015015	24.6779	6.4238
					0.0015015	24.6989	6.4238
					0.0045045	24.7199	6.42386
					0.00750751	24.7409	6.42397
					0.0105105	24.7619	6.42415
					0.0135135	24.7829	6.42438
					0.0165165	24.8039	6.42467
					0.0195195	24.8249	6.42502
					0.0225225	24.8459	6.42542
					0.0255255	24.8669	6.42589
					0.0285285	24.8879	6.42641
					0.0315315	24.909	6.42699
					0.0345345	24.93	6.42762
					0.0375375	24.951	6.42832
					0.0405405	24.972	6.42907
					0.0435435	24.993	6.42988
					0.0465465	25.014	6.43075
					0.0495495	25.035	6.43167
					0.0525526	25.056	6.43266
					0.0555556	25.077	6.4337
					0.0585586	25.098	6.4348
					0.0615616	25.119	6.43595
					0.0645646	25.14	6.43717
					0.0675676	25.161	6.43844
					0.0705706	25.182	6.43977
					0.0735736	25.203	6.44116
					0.0765766	25.224	6.4426
					0.0795796	25.245	6.4441
					0.0825826	25.266	6.44566
					0.0855856	25.287	6.44728
					0.0885886	25.308	6.44895
					0.0915916	25.329	6.45068
					0.0945946	25.35	6.45247
					0.0975976	25.371	6.45432
					0.100601	25.392	6.45622
					0.103604	25.413	6.45818
					0.106607	25.4341	6.46019
					0.10961	25.4551	6.46227
					0.112613	25.4761	6.4644
					0.115616	25.4971	6.46658
					0.118619	25.5181	6.46883
					0.121622	25.5391	6.47113
					0.124625	25.5601	6.47349
					0.127628	25.5811	6.4759
					0.130631	25.6021	6.47837
					0.133634	25.6231	6.4809
					0.136637	25.6441	6.48348
					0.13964	25.6651	6.48612
					0.142643	25.6861	6.48882
					0.145646	25.7071	6.49157
					0.148649	25.7281	6.49438
					0.151652	25.7491	6.49724
					0.154655	25.7701	6.50016
					0.157658	25.7911	6.50314
					0.160661	25.8121	6.50617
					0.163664	25.8331	6.50926
					0.166667	25.8541	6.5124
					0.16967	25.8751	6.5156
					0.172673	25.8961	6.51886
					0.175676	25.9171	6.52217
					0.178679	25.9382	6.52553
					0.181682	25.9592	6.52895
					0.184685	25.9802	6.53243
					0.187688	26.0012	6.53596
					0.190691	26.0222	6.53954
					0.193694	26.0432	6.54319
					0.196697	26.0642	6.54688
					0.1997	26.0852	6.55063
					0.202703	26.1062	6.55444
					0.205706	26.1272	6.5583
					0.208709	26.1482	6.56221
					0.211712	26.1692	6.56618
					0.214715	26.1902	6.5702
					0.217718	26.2112	6.57428
					0.220721	26.2322	6.57841
					0.223724	26.2532	6.58259
					0.226727	26.2742	6.58683
					0.22973	26.2952	6.59112
					0.232733	26.3162	6.59547
					0.235736	26.3372	6.59987
					0.238739	26.3582	6.60432
					0.241742	26.3792	6.60883
					0.244745	26.4002	6.61339
					0.247748	26.4212	6.618
					0.250751	26.4423	6.62267
					0.253754	26.4633	6.62738
					0.256757	26.4843	6.63216
					0.25976	26.5053	6.63698
					0.262763	26.5263	6.64186
					0.265766	26.5473	6.64678
					0.268769	26.5683	6.65177
					0.271772	26.5893	6.6568
					0.274775	26.6103	6.66188
					0.277778	26.6313	6.66702
					0.280781	26.6523	6.67221
					0.283784	26.6733	6.67745
					0.286787	26.6943	6.68274
					0.28979	26.7153	6.68809
					0.292793	26.7363	6.69348
					0.295796	26.7573	6.69893
					0.298799	26.7783	6.70442
					0.301802	26.7993	6.70997
					0.304805	26.8203	6.71557
					0.307808	26.8413	6.72122
					0.310811	26.8623	6.72692
					0.313814	26.8833	6.73267
					0.316817	26.9043	6.73847
					0.31982	26.9253	6.74432
					0.322823	26.9464	6.75023
					0.325826	26.9674	6.75618
					0.328829	26.9884	6.76218
					0.331832	27.0094	6.76823
					0.334835	27.0304	6.77433
					0.337838	27.0514	6.78048
					0.340841	27.0724	6.78668
					0.343844	27.0934	6.79293
					0.346847	27.1144	6.79922
					0.34985	27.1354	6.80557
					0.352853	27.1564	6.81196
					0.355856	27.1774	6.81841
					0.358859	27.1984	6.8249
					0.361862	27.2194	6.83144
					0.364865	27.2404	6.83803
					0.367868	27.2614	6.84466
					0.370871	27.2824	6.85135
					0.373874	27.3034	6.85808
					0.376877	27.3244	6.86486
					0.37988	27.3454	6.87168
					0.382883	27.3664	6.87856
					0.385886	27.3874	6.88548
					0.388889	27.4084	6.89245
					0.391892	27.4294	6.89946
					0.394895	27.4505	6.90653
					0.397898	27.4715	6.91363
					0.400901	27.4925	6.92079
					0.403904	27.5135	6.92799
					0.406907	27.5345	6.93524
					0.40991	27.5555	6.94253
					0.412913	27.5765	6.94987
					0.415916	27.5975	6.95726
					0.418919	27.6185	6.96469
					0.421922	27.6395	6.97216
					0.424925	27.6605	6.97969
					0.427928	27.6815	6.98725
					0.430931	27.7025	6.99486
					0.433934	27.7235	7.00252
					0.436937	27.7445	7.01022
					0.43994	27.7655	7.01797
					0.442943	27.7865	7.02576
					0.445946	27.8075	7.03359
					0.448949	27.8285	7.04147
					0.451952	27.8495	7.04939
					0.454955	27.8705	7.05736
					0.457958	27.8915	7.06537
					0.460961	27.9125	7.07343
					0.463964	27.9335	7.08152
					0.466967	27.9546	7.08966
					0.46997	27.9756	7.09785
					0.472973	27.9966	7.10607
					0.475976	28.0176	7.11434
					0.478979	28.0386	7.12265
					0.481982	28.0596	7.13101
					0.484985	28.0806	7.13941
					0.487988	28.1016	7.14785
					0.490991	28.1226	7.15633
					0.493994	28.1436	7.16485
					0.496997	28.1646	7.17341
					0.5	28.1856	7.18202
					0.503003	28.2066	7.19067
					0.506006	28.2276	7.19936
					0.509009	28.2486	7.20809
					0.512012	28.2696	7.21686
					0.515015	28.2906	7.22567
					0.518018	28.3116	7.23452
					0.521021	28.3326	7.24342
					0.524024	28.3536	7.25235
					0.527027	28.3746	7.26132
					0.53003	28.3956	7.27034
					0.533033	28.4166	7.27939
					0.536036	28.4376	7.28849
					0.539039	28.4586	7.29762
					0.542042	28.4797	7.30679
					0.545045	28.5007	7.316
					0.548048	28.5217	7.32526
					0.551051	28.5427	7.33455
					0.554054	28.5637	7.34388
					0.557057	28.5847	7.35325
					0.56006	28.6057	7.36265
					0.563063	28.6267	7.3721
					0.566066	28.6477	7.38158
					0.569069	28.6687	7.3911
					0.572072	28.6897	7.40066
					0.575075	28.7107	7.41026
					0.578078	28.7317	7.4199
					0.581081	28.7527	7.42957
					0.584084	28.7737	7.43928
					0.587087	28.7947	7.44903
					0.59009	28.8157	7.45881
					0.593093	28.8367	7.46864
					0.596096	28.8577	7.47849
					0.599099	28.8787	7.48839
					0.602102	28.8997	7.49832
					0.605105	28.9207	7.50829
					0.608108	28.9417	7.5183
					0.611111	28.9627	7.52834
					0.614114	28.9838	7.53841
					0.617117	29.0048	7.54853
					0.62012	29.0258	7.55868
					0.623123	29.0468	7.56886
					0.626126	29.0678	7.57908
					0.629129	29.0888	7.58934
					0.632132	29.1098	7.59962
					0.635135	29.1308	7.60995
					0.638138	29.1518	7.62031
					0.641141	29.1728	7.6307
					0.644144	29.1938	7.64113
					0.647147	29.2148	7.6516
					0.65015	29.2358	7.66209
					0.653153	29.2568	7.67263
					0.656156	29.2778	7.68319
					0.659159	29.2988	7.69379
					0.662162	29.3198	7.70443
					0.665165	29.3408	7.71509
					0.668168	29.3618	7.72579
					0.671171	29.3828	7.73653
					0.674174	29.4038	7.74729
					0.677177	29.4248	7.75809
					0.68018	29.4458	7.76893
					0.683183	29.4668	7.77979
					0.686186	29.4879	7.79069
					0.689189	29.5089	7.80162
					0.692192	29.5299	7.81259
					0.695195	29.5509	7.82358
					0.698198	29.5719	7.83461
					0.701201	29.5929	7.84567
					0.704204	29.6139	7.85676
					0.707207	29.6349	7.86788
					0.71021	29.6559	7.87904
					0.713213	29.6769	7.89022
					0.716216	29.6979	7.90144
					0.719219	29.7189	7.91269
					0.722222	29.7399	7.92396
					0.725225	29.7609	7.93527
					0.728228	29.7819	7.94662
					0.731231	29.8029	7.95799
					0.734234	29.8239	7.96939
					0.737237	29.8449	7.98082
					0.74024	29.8659	7.99228
					0.743243	29.8869	8.00377
					0.746246	29.9079	8.0153
					0.749249	29.9289	8.02685
					0.752252	29.9499	8.03843
					0.755255	29.9709	8.05004
					0.758258	29.9919	8.06168
					0.761261	30.013	8.07335
					0.764264	30.034	8.08505
					0.767267	30.055	8.09678
					0.77027	30.076	8.10854
					0.773273	30.097	8.12032
					0.776276	30.118	8.13214
					0.779279	30.139	8.14398
					0.782282	30.16	8.15585
					0.785285	30.181	8.16775
					0.788288	30.202	8.17968
					0.791291	30.223	8.19164
					0.794294	30.244	8.20362
					0.797297	30.265	8.21564
					0.8003	30.286	8.22767
					0.803303	30.307	8.23974
					0.806306	30.328	8.25184
					0.809309	30.349	8.26396
					0.812312	30.37	8.27611
					0.815315	30.391	8.28828
					0.818318	30.412	8.30049
					0.821321	30.433	8.31272
					0.824324	30.454	8.32498
					0.827327	30.475	8.33726
					0.83033	30.496	8.34957
					0.833333	30.5171	8.36191
					0.836336	30.5381	8.37427
					0.839339	30.5591	8.38666
					0.842342	30.5801	8.39907
					0.845345	30.6011	8.41151
					0.848348	30.6221	8.42398
					0.851351	30.6431	8.43647
					0.854354	30.6641	8.44899
					0.857357	30.6851	8.46153
					0.86036	30.7061	8.4741
					0.863363	30.7271	8.48669
					0.866366	30.7481	8.49931
					0.869369	30.7691	8.51196
					0.872372	30.7901	8.52463
					0.875375	30.8111	8.53732
					0.878378	30.8321	8.55004
					0.881381	30.8531	8.56278
					0.884384	30.8741	8.57555
					0.887387	30.8951	8.58834
					0.89039	30.9161	8.60116
					0.893393	30.9371	8.614
					0.896396	30.9581	8.62686
					0.899399	30.9791	8.63975
					0.902402	31.0001	8.65266
					0.905405	31.0212	8.6656
					0.908408	31.0422	8.67856
					0.911411	31.0632	8.69154
					0.914414	31.0842	8.70454
					0.917417	31.1052	8.71758
					0.92042	31.1262	8.73063
					0.923423	31.1472	8.7437
					0.926426	31.1682	8.7568
					0.929429	31.1892	8.76992
					0.932432	31.2102	8.78307
					0.935435	31.2312	8.79623
					0.938438	31.2522	8.80942
					0.941441	31.2732	8.82264
					0.944444	31.2942	8.83587
					0.947447	31.3152	8.84913
					0.95045	31.3362	8.86241
					0.953453	31.3572	8.87571
					0.956457	31.3782	8.88903
					0.95946	31.3992	8.90237
					0.962462	31.4202	8.91574
					0.965465	31.4412	8.92913
					0.968468	31.4622	8.94254
					0.971472	31.4832	8.95597
					0.974475	31.5042	8.96942
					0.977477	31.5253	8.98289
					0.98048	31.5463	8.99639
					0.983483	31.5673	9.0099
					0.986487	31.5883	9.02344
					0.98949	31.6093	9.037
					0.992492	31.6303	9.05058
					0.995495	31.6513	9.06418
					0.998498	31.6723	9.0778
					1.0015	31.6933	9.09144
					1.0045	31.7143	9.1051
					1.00751	31.7353	9.11878
					1.01051	31.7563	9.13248
					1.01351	31.7773	9.14621
					1.01652	31.7983	9.15995
					1.01952	31.8193	9.17371
					1.02252	31.8403	9.18749
					1.02553	31.8613	9.20129
					1.02853	31.8823	9.21511
					1.03153	31.9033	9.22895
					1.03453	31.9243	9.24281
					1.03754	31.9453	9.25669
					1.04054	31.9663	9.27059
					1.04354	31.9873	9.28451
					1.04655	32.0083	9.29845
					1.04955	32.0294	9.31241
					1.05255	32.0504	9.32638
					1.05556	32.0714	9.34038
					1.05856	32.0924	9.35439
					1.06156	32.1134	9.36842
					1.06456	32.1344	9.38247
					1.06757	32.1554	9.39654
					1.07057	32.1764	9.41063
					1.07357	32.1974	9.42474
					1.07658	32.2184	9.43886
					1.07958	32.2394	9.453
					1.08258	32.2604	9.46717
					1.08559	32.2814	9.48134
					1.08859	32.3024	9.49554
					1.09159	32.3234	9.50976
					1.09459	32.3444	9.52399
					1.0976	32.3654	9.53824
					1.1006	32.3864	9.55251
					1.1036	32.4074	9.5668
					1.10661	32.4284	9.5811
					1.10961	32.4494	9.59542
					1.11261	32.4704	9.60976
					1.11562	32.4914	9.62412
					1.11862	32.5124	9.63849
					1.12162	32.5334	9.65288
					1.12462	32.5545	9.66729
					1.12763	32.5755	9.68171
					1.13063	32.5965	9.69615
					1.13363	32.6175	9.71061
					1.13664	32.6385	9.72509
					1.13964	32.6595	9.73958
					1.14264	32.6805	9.75409
					1.14565	32.7015	9.76861
					1.14865	32.7225	9.78315
					1.15165	32.7435	9.79771
					1.15465	32.7645	9.81228
					1.15766	32.7855	9.82687
					1.16066	32.8065	9.84148
					1.16366	32.8275	9.8561
					1.16667	32.8485	9.87074
					1.16967	32.8695	9.8854
					1.17267	32.8905	9.90007
					1.17568	32.9115	9.91475
					1.17868	32.9325	9.92946
					1.18168	32.9535	9.94417
					1.18468	32.9745	9.95891
					1.18769	32.9955	9.97366
					1.19069	33.0165	9.98842
					1.19369	33.0375	10.0032
					1.1967	33.0585	10.018
					1.1997	33.0796	10.0328
					1.2027	33.1006	10.0476
					1.20571	33.1216	10.0625
					1.20871	33.1426	10.0773
					1.21171	33.1636	10.0922
					1.21471	33.1846	10.1071
					1.21772	33.2056	10.122
					1.22072	33.2266	10.1369
					1.22372	33.2476	10.1518
					1.22673	33.2686	10.1668
					1.22973	33.2896	10.1817
					1.23273	33.3106	10.1967
					1.23574	33.3316	10.2117
					1.23874	33.3526	10.2267
					1.24174	33.3736	10.2417
					1.24474	33.3946	10.2567
					1.24775	33.4156	10.2718
					1.25075	33.4366	10.2869
					1.25375	33.4576	10.3019
					1.25676	33.4786	10.317
					1.25976	33.4996	10.3321
					1.26276	33.5206	10.3472
					1.26577	33.5416	10.3624
					1.26877	33.5627	10.3775
					1.27177	33.5837	10.3927
					1.27477	33.6047	10.4078
					1.27778	33.6257	10.423
					1.28078	33.6467	10.4382
					1.28378	33.6677	10.4534
					1.28679	33.6887	10.4687
					1.28979	33.7097	10.4839
					1.29279	33.7307	10.4991
					1.2958	33.7517	10.5144
					1.2988	33.7727	10.5297
					1.3018	33.7937	10.545
					1.3048	33.8147	10.5603
					1.30781	33.8357	10.5756
					1.31081	33.8567	10.5909
					1.31381	33.8777	10.6063
					1.31682	33.8987	10.6216
					1.31982	33.9197	10.637
					1.32282	33.9407	10.6524
					1.32583	33.9617	10.6678
					1.32883	33.9827	10.6832
					1.33183	34.0037	10.6986
					1.33483	34.0247	10.714
					1.33784	34.0457	10.7295
					1.34084	34.0667	10.7449
					1.34384	34.0878	10.7604
					1.34685	34.1088	10.7759
					1.34985	34.1298	10.7914
					1.35285	34.1508	10.8069
					1.35586	34.1718	10.8224
					1.35886	34.1928	10.8379
					1.36186	34.2138	10.8535
					1.36486	34.2348	10.869
					1.36787	34.2558	10.8846
					1.37087	34.2768	10.9002
					1.37387	34.2978	10.9158
					1.37688	34.3188	10.9314
					1.37988	34.3398	10.947
					1.38288	34.3608	10.9626
					1.38589	34.3818	10.9783
					1.38889	34.4028	10.9939
					1.39189	34.4238	11.0096
					1.39489	34.4448	11.0252
					1.3979	34.4658	11.0409
					1.4009	34.4868	11.0566
					1.4039	34.5078	11.0723
					1.40691	34.5288	11.088
					1.40991	34.5498	11.1038
					1.41291	34.5709	11.1195
					1.41592	34.5919	11.1353
					1.41892	34.6129	11.151
					1.42192	34.6339	11.1668
					1.42492	34.6549	11.1826
					1.42793	34.6759	11.1984
					1.43093	34.6969	11.2142
					1.43393	34.7179	11.23
					1.43694	34.7389	11.2458
					1.43994	34.7599	11.2617
					1.44294	34.7809	11.2775
					1.44595	34.8019	11.2934
					1.44895	34.8229	11.3093
					1.45195	34.8439	11.3251
					1.45495	34.8649	11.341
					1.45796	34.8859	11.3569
					1.46096	34.9069	11.3728
					1.46396	34.9279	11.3888
					1.46697	34.9489	11.4047
					1.46997	34.9699	11.4207
					1.47297	34.9909	11.4366
					1.47598	35.0119	11.4526
					1.47898	35.0329	11.4685
					1.48198	35.0539	11.4845
					1.48498	35.0749	11.5005
					1.48799	35.096	11.5165
					1.49099	35.117	11.5326
					1.49399	35.138	11.5486
					1.497	35.159	11.5646
					1.5	35.18	11.5807
