# Supplementary material for: Multi-dimensional social relationships shape social attention in monkeys
Source: eLife. 2025 Mar 7;14:RP104460. doi: 10.7554/eLife.104460 (PMC11888598; doi:10.7554/eLife.104460)
Supplement: Figure 3—source data 1. [file elife-104460-fig3-data1.xlsx]

## Sheet: Fig.3b
histogram	congruent		mean-response time (ms)		rowdata-response time (ms)
		in-group	113.32		95	195	55	108	84	90	95	216	100	84	143	171	93	120	102	127	122	158	91	195	55	50	52	110	61	91	80	99	113	215	106	NaN	161	99	120	120	121	131	160	31	191	205	117	121	82
		out-group	102.21		NaN	119	66	96	79	109	151	91	63	81	66	83	74	77	92	74	91	161	104	151	73	93	127	88	86	94	NaN	80	85	90	168	37	154	94	93	115	80	126	129	129	106	164	115	73	98
	incongruent		mean-response time (ms)		rowdata-response time (ms)
		in-group	216.94		227	207	269	191	NaN	192	242	197	247	176	197	165	232	211	273	273	281	188	193	197	204	212	207	292	197	178	202	198	226	248	NaN	196	259	247	217	259	270	NaN	237	269	190	240	273	258	227
		out-group	226.08		194	228	287	NaN	263	174	250	282	235	246	207	220	192	242	265	286	178	203	253	237	181	174	226	284	174	281	225	NaN	NaN	232	241	203	294	275	NaN	263	213	172	288	227	211	275	244	258	205
[truncated: 158 more columns]

## Sheet: Fig.3c
		mean	errorbar		rowdata
MA -distractor bias (ms)	in-group	71.8854	6.05892		46.2558	27.9222	56.5381	58.0685	68.0237	87.527	75.4013	90.0843	92.727	95.2386	78.8901	85.9479
	out-group	88.401	4.68297		78.8941	55.1687	77.0471	81.0023	97.3647	100.129	100.833	114.868	103.536	75.2984	92.954	83.7172
MK-distractor bias (ms)	in-group	41.4768	2.58378		39.6521	53.1975	49.0019	55.8817	33.2853	34.9598	46.8783	37.7377	44.7072	34.3243	25.339	42.7568
	out-group	50.0657	2.30533		44.6165	52.7005	46.9608	57.2469	54.0061	56.6772	54.8232	58.8165	49.0301	54.793	36.233	34.8846
ML-distractor bias (ms)	in-group	2.64421	2.56127		12.0059	-14.9153	-3.93128	2.46705	2.22887	8.32116	3.14247	-1.03226	17.2927	-8.4318	7.4828	7.10017
	out-group	19.8224	2.78759		26.7692	40.3923	12.6761	6.76163	16.2815	19.407	15.6621	11.3945	34.2121	21.2688	15.9303	17.1128
MC-distractor bias (ms)	in-group	-17.2528	4.19773		-50.0376	-37.5489	-24.962	-21.731	-3.44924	-9.83342	-16.6712	-15.8191	-7.645	0.215975	-10.8811	-8.67069
	out-group	-12.5139	4.76952		-43.9344	-34.829	-22.1917	-18.8088	-11.2447	-7.36447	-0.720546	-17.2521	-2.24819	-12.9756	13.0586	8.34455

## Sheet: Fig.3f and 3g
weight
in-group	0.34	0.54	0.58
out-group	0.48	0.62	0.92

## Sheet: Fig.3h
in-group (mean)	social engagement index	diatractor bias (ms)	errorbar		out-group (mean)	social engagement index	diatractor bias (ms)	errorbar
MA	-1.8	71.8854	24.2312		MA	-2.5	88.401	23.0908
MK	-0.64	41.4768	19.3397		MK	-0.66	50.0657	12.8244
ML	0.84	2.64421	13.5146		ML	0.8	19.8224	20.4828
MC	1.6	-17.2528	18.3439		MC	2.36	-12.5139	18.6328
in-group (fitted curve)	social engagement index	diatractor bias (ms)			out-group (fitted curve)	social engagement index	diatractor bias (ms)
	-4	129.572				-4	119.489
	-3.99199	129.362				-3.99199	119.323
	-3.98398	129.152				-3.98398	119.156
	-3.97598	128.942				-3.97598	118.99
	-3.96797	128.732				-3.96797	118.824
	-3.95996	128.522				-3.95996	118.658
	-3.95195	128.312				-3.95195	118.491
	-3.94394	128.102				-3.94394	118.325
	-3.93594	127.892				-3.93594	118.159
	-3.92793	127.682				-3.92793	117.993
	-3.91992	127.472				-3.91992	117.826
	-3.91191	127.262				-3.91191	117.66
	-3.9039	127.052				-3.9039	117.494
	-3.8959	126.842				-3.8959	117.328
	-3.88789	126.632				-3.88789	117.161
	-3.87988	126.422				-3.87988	116.995
	-3.87187	126.212				-3.87187	116.829
	-3.86386	126.002				-3.86386	116.663
	-3.85586	125.792				-3.85586	116.496
	-3.84785	125.582				-3.84785	116.33
	-3.83984	125.372				-3.83984	116.164
	-3.83183	125.162				-3.83183	115.998
	-3.82382	124.952				-3.82382	115.831
	-3.81582	124.742				-3.81582	115.665
	-3.80781	124.532				-3.80781	115.499
	-3.7998	124.322				-3.7998	115.332
	-3.79179	124.112				-3.79179	115.166
	-3.78378	123.902				-3.78378	115
	-3.77578	123.692				-3.77578	114.834
	-3.76777	123.482				-3.76777	114.667
	-3.75976	123.272				-3.75976	114.501
	-3.75175	123.062				-3.75175	114.335
	-3.74374	122.852				-3.74374	114.169
	-3.73574	122.642				-3.73574	114.002
	-3.72773	122.432				-3.72773	113.836
	-3.71972	122.222				-3.71972	113.67
	-3.71171	122.013				-3.71171	113.504
	-3.7037	121.803				-3.7037	113.337
	-3.6957	121.593				-3.6957	113.171
	-3.68769	121.383				-3.68769	113.005
	-3.67968	121.173				-3.67968	112.839
	-3.67167	120.963				-3.67167	112.672
	-3.66366	120.753				-3.66366	112.506
	-3.65566	120.543				-3.65566	112.34
	-3.64765	120.333				-3.64765	112.174
	-3.63964	120.123				-3.63964	112.007
	-3.63163	119.913				-3.63163	111.841
	-3.62362	119.703				-3.62362	111.675
	-3.61562	119.493				-3.61562	111.509
	-3.60761	119.283				-3.60761	111.342
	-3.5996	119.073				-3.5996	111.176
	-3.59159	118.863				-3.59159	111.01
	-3.58358	118.653				-3.58358	110.844
	-3.57558	118.443				-3.57558	110.677
	-3.56757	118.233				-3.56757	110.511
	-3.55956	118.023				-3.55956	110.345
	-3.55155	117.813				-3.55155	110.179
	-3.54354	117.603				-3.54354	110.012
	-3.53554	117.393				-3.53554	109.846
	-3.52753	117.183				-3.52753	109.68
	-3.51952	116.973				-3.51952	109.514
	-3.51151	116.763				-3.51151	109.347
	-3.5035	116.553				-3.5035	109.181
	-3.4955	116.343				-3.4955	109.015
	-3.48749	116.133				-3.48749	108.848
	-3.47948	115.923				-3.47948	108.682
	-3.47147	115.713				-3.47147	108.516
	-3.46346	115.503				-3.46346	108.35
	-3.45546	115.293				-3.45546	108.183
	-3.44745	115.083				-3.44745	108.017
	-3.43944	114.873				-3.43944	107.851
	-3.43143	114.663				-3.43143	107.685
	-3.42342	114.453				-3.42342	107.518
	-3.41542	114.243				-3.41542	107.352
	-3.40741	114.033				-3.40741	107.186
	-3.3994	113.823				-3.3994	107.02
	-3.39139	113.613				-3.39139	106.853
	-3.38338	113.403				-3.38338	106.687
	-3.37538	113.193				-3.37538	106.521
	-3.36737	112.984				-3.36737	106.355
	-3.35936	112.774				-3.35936	106.188
	-3.35135	112.564				-3.35135	106.022
	-3.34334	112.354				-3.34334	105.856
	-3.33534	112.144				-3.33534	105.69
	-3.32733	111.934				-3.32733	105.523
	-3.31932	111.724				-3.31932	105.357
	-3.31131	111.514				-3.31131	105.191
	-3.3033	111.304				-3.3033	105.025
	-3.2953	111.094				-3.2953	104.858
	-3.28729	110.884				-3.28729	104.692
	-3.27928	110.674				-3.27928	104.526
	-3.27127	110.464				-3.27127	104.36
	-3.26326	110.254				-3.26326	104.193
	-3.25526	110.044				-3.25526	104.027
	-3.24725	109.834				-3.24725	103.861
	-3.23924	109.624				-3.23924	103.695
	-3.23123	109.414				-3.23123	103.528
	-3.22322	109.204				-3.22322	103.362
	-3.21522	108.994				-3.21522	103.196
	-3.20721	108.784				-3.20721	103.03
	-3.1992	108.574				-3.1992	102.863
	-3.19119	108.364				-3.19119	102.697
	-3.18318	108.154				-3.18318	102.531
	-3.17518	107.944				-3.17518	102.364
	-3.16717	107.734				-3.16717	102.198
	-3.15916	107.524				-3.15916	102.032
	-3.15115	107.314				-3.15115	101.866
	-3.14314	107.104				-3.14314	101.699
	-3.13514	106.894				-3.13514	101.533
	-3.12713	106.684				-3.12713	101.367
	-3.11912	106.474				-3.11912	101.201
	-3.11111	106.264				-3.11111	101.034
	-3.1031	106.054				-3.1031	100.868
	-3.0951	105.844				-3.0951	100.702
	-3.08709	105.634				-3.08709	100.536
	-3.07908	105.424				-3.07908	100.369
	-3.07107	105.214				-3.07107	100.203
	-3.06306	105.004				-3.06306	100.037
	-3.05506	104.794				-3.05506	99.8706
	-3.04705	104.584				-3.04705	99.7044
	-3.03904	104.374				-3.03904	99.5381
	-3.03103	104.165				-3.03103	99.3719
	-3.02302	103.955				-3.02302	99.2056
	-3.01502	103.745				-3.01502	99.0394
	-3.00701	103.535				-3.00701	98.8731
	-2.999	103.325				-2.999	98.7069
	-2.99099	103.115				-2.99099	98.5406
	-2.98298	102.905				-2.98298	98.3743
	-2.97497	102.695				-2.97497	98.2081
	-2.96697	102.485				-2.96697	98.0418
	-2.95896	102.275				-2.95896	97.8756
	-2.95095	102.065				-2.95095	97.7093
	-2.94294	101.855				-2.94294	97.543
	-2.93493	101.645				-2.93493	97.3768
	-2.92693	101.435				-2.92693	97.2105
	-2.91892	101.225				-2.91892	97.0443
	-2.91091	101.015				-2.91091	96.878
	-2.9029	100.805				-2.9029	96.7118
	-2.89489	100.595				-2.89489	96.5455
	-2.88689	100.385				-2.88689	96.3793
	-2.87888	100.175				-2.87888	96.213
	-2.87087	99.965				-2.87087	96.0467
	-2.86286	99.755				-2.86286	95.8805
	-2.85485	99.545				-2.85485	95.7142
	-2.84685	99.335				-2.84685	95.548
	-2.83884	99.1251				-2.83884	95.3817
	-2.83083	98.9151				-2.83083	95.2155
	-2.82282	98.7051				-2.82282	95.0492
	-2.81481	98.4951				-2.81481	94.8829
	-2.80681	98.2852				-2.80681	94.7167
	-2.7988	98.0752				-2.7988	94.5504
	-2.79079	97.8652				-2.79079	94.3842
	-2.78278	97.6552				-2.78278	94.2179
	-2.77477	97.4453				-2.77477	94.0517
	-2.76677	97.2353				-2.76677	93.8854
	-2.75876	97.0253				-2.75876	93.7192
	-2.75075	96.8153				-2.75075	93.5529
	-2.74274	96.6053				-2.74274	93.3866
	-2.73473	96.3954				-2.73473	93.2204
	-2.72673	96.1854				-2.72673	93.0541
	-2.71872	95.9754				-2.71872	92.8879
	-2.71071	95.7654				-2.71071	92.7216
	-2.7027	95.5555				-2.7027	92.5554
	-2.69469	95.3455				-2.69469	92.3891
	-2.68669	95.1355				-2.68669	92.2228
	-2.67868	94.9255				-2.67868	92.0566
	-2.67067	94.7155				-2.67067	91.8903
	-2.66266	94.5056				-2.66266	91.7241
	-2.65465	94.2956				-2.65465	91.5578
	-2.64665	94.0856				-2.64665	91.3916
	-2.63864	93.8756				-2.63864	91.2253
	-2.63063	93.6657				-2.63063	91.059
	-2.62262	93.4557				-2.62262	90.8928
	-2.61461	93.2457				-2.61461	90.7265
	-2.60661	93.0357				-2.60661	90.5603
	-2.5986	92.8258				-2.5986	90.394
	-2.59059	92.6158				-2.59059	90.2278
	-2.58258	92.4058				-2.58258	90.0615
	-2.57457	92.1958				-2.57457	89.8953
	-2.56657	91.9859				-2.56657	89.729
	-2.55856	91.7759				-2.55856	89.5627
	-2.55055	91.5659				-2.55055	89.3965
	-2.54254	91.3559				-2.54254	89.2302
	-2.53453	91.146				-2.53453	89.064
	-2.52653	90.936				-2.52653	88.8977
	-2.51852	90.726				-2.51852	88.7315
	-2.51051	90.516				-2.51051	88.5652
	-2.5025	90.306				-2.5025	88.3989
	-2.49449	90.0961				-2.49449	88.2327
	-2.48649	89.8861				-2.48649	88.0664
	-2.47848	89.6761				-2.47848	87.9002
	-2.47047	89.4661				-2.47047	87.7339
	-2.46246	89.2562				-2.46246	87.5677
	-2.45445	89.0462				-2.45445	87.4014
	-2.44645	88.8362				-2.44645	87.2352
	-2.43844	88.6262				-2.43844	87.0689
	-2.43043	88.4163				-2.43043	86.9026
	-2.42242	88.2063				-2.42242	86.7364
	-2.41441	87.9963				-2.41441	86.5701
	-2.40641	87.7863				-2.40641	86.4039
	-2.3984	87.5764				-2.3984	86.2376
	-2.39039	87.3664				-2.39039	86.0714
	-2.38238	87.1564				-2.38238	85.9051
	-2.37437	86.9464				-2.37437	85.7388
	-2.36637	86.7365				-2.36637	85.5726
	-2.35836	86.5265				-2.35836	85.4063
	-2.35035	86.3165				-2.35035	85.2401
	-2.34234	86.1065				-2.34234	85.0738
	-2.33433	85.8965				-2.33433	84.9076
	-2.32633	85.6866				-2.32633	84.7413
	-2.31832	85.4766				-2.31832	84.5751
	-2.31031	85.2666				-2.31031	84.4088
	-2.3023	85.0566				-2.3023	84.2425
	-2.29429	84.8467				-2.29429	84.0763
	-2.28629	84.6367				-2.28629	83.91
	-2.27828	84.4267				-2.27828	83.7438
	-2.27027	84.2167				-2.27027	83.5775
	-2.26226	84.0067				-2.26226	83.4113
	-2.25425	83.7968				-2.25425	83.245
	-2.24625	83.5868				-2.24625	83.0787
	-2.23824	83.3768				-2.23824	82.9125
	-2.23023	83.1668				-2.23023	82.7462
	-2.22222	82.9569				-2.22222	82.58
	-2.21421	82.7469				-2.21421	82.4137
	-2.20621	82.5369				-2.20621	82.2475
	-2.1982	82.3269				-2.1982	82.0812
	-2.19019	82.117				-2.19019	81.915
	-2.18218	81.907				-2.18218	81.7487
	-2.17417	81.697				-2.17417	81.5824
	-2.16617	81.487				-2.16617	81.4162
	-2.15816	81.2771				-2.15816	81.2499
	-2.15015	81.0671				-2.15015	81.0837
	-2.14214	80.8571				-2.14214	80.9174
	-2.13413	80.6471				-2.13413	80.7511
	-2.12613	80.4372				-2.12613	80.5849
	-2.11812	80.2272				-2.11812	80.4186
	-2.11011	80.0172				-2.11011	80.2524
	-2.1021	79.8072				-2.1021	80.0861
	-2.09409	79.5973				-2.09409	79.9199
	-2.08609	79.3873				-2.08609	79.7536
	-2.07808	79.1773				-2.07808	79.5874
	-2.07007	78.9673				-2.07007	79.4211
	-2.06206	78.7574				-2.06206	79.2548
	-2.05405	78.5474				-2.05405	79.0886
	-2.04605	78.3374				-2.04605	78.9223
	-2.03804	78.1274				-2.03804	78.7561
	-2.03003	77.9174				-2.03003	78.5898
	-2.02202	77.7075				-2.02202	78.4236
	-2.01401	77.4975				-2.01401	78.2573
	-2.00601	77.2875				-2.00601	78.091
	-1.998	77.0775				-1.998	77.9248
	-1.98999	76.8675				-1.98999	77.7585
	-1.98198	76.6576				-1.98198	77.5923
	-1.97397	76.4476				-1.97397	77.426
	-1.96597	76.2376				-1.96597	77.2598
	-1.95796	76.0276				-1.95796	77.0935
	-1.94995	75.8177				-1.94995	76.9273
	-1.94194	75.6077				-1.94194	76.761
	-1.93393	75.3977				-1.93393	76.5947
	-1.92593	75.1877				-1.92593	76.4285
	-1.91792	74.9778				-1.91792	76.2622
	-1.90991	74.7678				-1.90991	76.096
	-1.9019	74.5578				-1.9019	75.9297
	-1.89389	74.3478				-1.89389	75.7635
	-1.88589	74.1379				-1.88589	75.5972
	-1.87788	73.9279				-1.87788	75.4309
	-1.86987	73.7179				-1.86987	75.2647
	-1.86186	73.5079				-1.86186	75.0984
	-1.85385	73.298				-1.85385	74.9322
	-1.84585	73.088				-1.84585	74.7659
	-1.83784	72.878				-1.83784	74.5997
	-1.82983	72.668				-1.82983	74.4334
	-1.82182	72.4581				-1.82182	74.2672
	-1.81381	72.2481				-1.81381	74.1009
	-1.80581	72.0381				-1.80581	73.9346
	-1.7978	71.8281				-1.7978	73.7684
	-1.78979	71.6181				-1.78979	73.6021
	-1.78178	71.4082				-1.78178	73.4359
	-1.77377	71.1982				-1.77377	73.2696
	-1.76577	70.9882				-1.76577	73.1034
	-1.75776	70.7782				-1.75776	72.9371
	-1.74975	70.5683				-1.74975	72.7708
	-1.74174	70.3583				-1.74174	72.6046
	-1.73373	70.1483				-1.73373	72.4383
	-1.72573	69.9383				-1.72573	72.2721
	-1.71772	69.7284				-1.71772	72.1058
	-1.70971	69.5184				-1.70971	71.9396
	-1.7017	69.3084				-1.7017	71.7733
	-1.69369	69.0984				-1.69369	71.6071
	-1.68569	68.8885				-1.68569	71.4408
	-1.67768	68.6785				-1.67768	71.2745
	-1.66967	68.4685				-1.66967	71.1083
	-1.66166	68.2585				-1.66166	70.942
	-1.65365	68.0485				-1.65365	70.7758
	-1.64565	67.8386				-1.64565	70.6095
	-1.63764	67.6286				-1.63764	70.4433
	-1.62963	67.4186				-1.62963	70.277
	-1.62162	67.2086				-1.62162	70.1107
	-1.61361	66.9987				-1.61361	69.9445
	-1.60561	66.7887				-1.60561	69.7782
	-1.5976	66.5787				-1.5976	69.612
	-1.58959	66.3687				-1.58959	69.4457
	-1.58158	66.1588				-1.58158	69.2795
	-1.57357	65.9488				-1.57357	69.1132
	-1.56557	65.7388				-1.56557	68.9469
	-1.55756	65.5288				-1.55756	68.7807
	-1.54955	65.3188				-1.54955	68.6144
	-1.54154	65.1089				-1.54154	68.4482
	-1.53353	64.8989				-1.53353	68.2819
	-1.52553	64.6889				-1.52553	68.1157
	-1.51752	64.4789				-1.51752	67.9494
	-1.50951	64.269				-1.50951	67.7832
	-1.5015	64.059				-1.5015	67.6169
	-1.49349	63.849				-1.49349	67.4506
	-1.48549	63.639				-1.48549	67.2844
	-1.47748	63.4291				-1.47748	67.1181
	-1.46947	63.2191				-1.46947	66.9519
	-1.46146	63.0091				-1.46146	66.7856
	-1.45345	62.7991				-1.45345	66.6194
	-1.44545	62.5892				-1.44545	66.4531
	-1.43744	62.3792				-1.43744	66.2868
	-1.42943	62.1692				-1.42943	66.1206
	-1.42142	61.9592				-1.42142	65.9543
	-1.41341	61.7493				-1.41341	65.7881
	-1.40541	61.5393				-1.40541	65.6218
	-1.3974	61.3293				-1.3974	65.4556
	-1.38939	61.1193				-1.38939	65.2893
	-1.38138	60.9093				-1.38138	65.1231
	-1.37337	60.6994				-1.37337	64.9568
	-1.36537	60.4894				-1.36537	64.7905
	-1.35736	60.2794				-1.35736	64.6243
	-1.34935	60.0694				-1.34935	64.458
	-1.34134	59.8595				-1.34134	64.2918
	-1.33333	59.6495				-1.33333	64.1255
	-1.32533	59.4395				-1.32533	63.9592
	-1.31732	59.2295				-1.31732	63.793
	-1.30931	59.0196				-1.30931	63.6267
	-1.3013	58.8096				-1.3013	63.4605
	-1.29329	58.5996				-1.29329	63.2942
	-1.28529	58.3896				-1.28529	63.128
	-1.27728	58.1797				-1.27728	62.9617
	-1.26927	57.9697				-1.26927	62.7955
	-1.26126	57.7597				-1.26126	62.6292
	-1.25325	57.5497				-1.25325	62.4629
	-1.24525	57.3397				-1.24525	62.2967
	-1.23724	57.1298				-1.23724	62.1304
	-1.22923	56.9198				-1.22923	61.9642
	-1.22122	56.7098				-1.22122	61.7979
	-1.21321	56.4998				-1.21321	61.6317
	-1.20521	56.2899				-1.20521	61.4654
	-1.1972	56.0799				-1.1972	61.2991
	-1.18919	55.8699				-1.18919	61.1329
	-1.18118	55.6599				-1.18118	60.9666
	-1.17317	55.45				-1.17317	60.8004
	-1.16517	55.24				-1.16517	60.6341
	-1.15716	55.03				-1.15716	60.4679
	-1.14915	54.82				-1.14915	60.3016
	-1.14114	54.6101				-1.14114	60.1354
	-1.13313	54.4001				-1.13313	59.9691
	-1.12513	54.1901				-1.12513	59.8028
	-1.11712	53.9801				-1.11712	59.6366
	-1.10911	53.7701				-1.10911	59.4703
	-1.1011	53.5602				-1.1011	59.3041
	-1.09309	53.3502				-1.09309	59.1378
	-1.08509	53.1402				-1.08509	58.9716
	-1.07708	52.9302				-1.07708	58.8053
	-1.06907	52.7203				-1.06907	58.639
	-1.06106	52.5103				-1.06106	58.4728
	-1.05305	52.3003				-1.05305	58.3065
	-1.04505	52.0903				-1.04505	58.1403
	-1.03704	51.8804				-1.03704	57.974
	-1.02903	51.6704				-1.02903	57.8078
	-1.02102	51.4604				-1.02102	57.6415
	-1.01301	51.2504				-1.01301	57.4752
	-1.005	51.0404				-1.005	57.309
	-0.996997	50.8305				-0.996997	57.1427
	-0.988989	50.6205				-0.988989	56.9765
	-0.980981	50.4105				-0.980981	56.8102
	-0.972973	50.2005				-0.972973	56.644
	-0.964965	49.9906				-0.964965	56.4777
	-0.956957	49.7806				-0.956957	56.3115
	-0.948949	49.5706				-0.948949	56.1452
	-0.940941	49.3606				-0.940941	55.9789
	-0.932933	49.1507				-0.932933	55.8127
	-0.924925	48.9407				-0.924925	55.6464
	-0.916917	48.7307				-0.916917	55.4802
	-0.908909	48.5207				-0.908909	55.3139
	-0.900901	48.3108				-0.900901	55.1477
	-0.892893	48.1008				-0.892893	54.9814
	-0.884885	47.8908				-0.884885	54.8151
	-0.876877	47.6808				-0.876877	54.6489
	-0.868869	47.4708				-0.868869	54.4826
	-0.860861	47.2609				-0.860861	54.3164
	-0.852853	47.0509				-0.852853	54.1501
	-0.844845	46.8409				-0.844845	53.9839
	-0.836837	46.6309				-0.836837	53.8176
	-0.828829	46.421				-0.828829	53.6514
	-0.820821	46.211				-0.820821	53.4851
	-0.812813	46.001				-0.812813	53.3188
	-0.804805	45.791				-0.804805	53.1526
	-0.796797	45.5811				-0.796797	52.9863
	-0.788789	45.3711				-0.788789	52.8201
	-0.780781	45.1611				-0.780781	52.6538
	-0.772773	44.9511				-0.772773	52.4876
	-0.764765	44.7412				-0.764765	52.3213
	-0.756757	44.5312				-0.756757	52.155
	-0.748749	44.3212				-0.748749	51.9888
	-0.740741	44.1112				-0.740741	51.8225
	-0.732733	43.9013				-0.732733	51.6563
	-0.724725	43.6913				-0.724725	51.49
	-0.716717	43.4813				-0.716717	51.3238
	-0.708709	43.2713				-0.708709	51.1575
	-0.700701	43.0613				-0.700701	50.9912
	-0.692693	42.8514				-0.692693	50.825
	-0.684685	42.6414				-0.684685	50.6587
	-0.676677	42.4314				-0.676677	50.4925
	-0.668669	42.2214				-0.668669	50.3262
	-0.660661	42.0115				-0.660661	50.16
	-0.652653	41.8015				-0.652653	49.9937
	-0.644645	41.5915				-0.644645	49.8274
	-0.636637	41.3815				-0.636637	49.6612
	-0.628629	41.1716				-0.628629	49.4949
	-0.620621	40.9616				-0.620621	49.3287
	-0.612613	40.7516				-0.612613	49.1624
	-0.604605	40.5416				-0.604605	48.9962
	-0.596597	40.3317				-0.596597	48.8299
	-0.588589	40.1217				-0.588589	48.6637
	-0.580581	39.9117				-0.580581	48.4974
	-0.572573	39.7017				-0.572573	48.3311
	-0.564565	39.4918				-0.564565	48.1649
	-0.556557	39.2818				-0.556557	47.9986
	-0.548548	39.0718				-0.548548	47.8324
	-0.54054	38.8618				-0.54054	47.6661
	-0.532532	38.6518				-0.532532	47.4999
	-0.524524	38.4419				-0.524524	47.3336
	-0.516517	38.2319				-0.516517	47.1673
	-0.508509	38.0219				-0.508509	47.0011
	-0.500501	37.8119				-0.500501	46.8348
	-0.492492	37.602				-0.492492	46.6686
	-0.484484	37.392				-0.484484	46.5023
	-0.476477	37.182				-0.476477	46.3361
	-0.468468	36.972				-0.468468	46.1698
	-0.46046	36.7621				-0.46046	46.0035
	-0.452452	36.5521				-0.452452	45.8373
	-0.444444	36.3421				-0.444444	45.671
	-0.436436	36.1321				-0.436436	45.5048
	-0.428428	35.9222				-0.428428	45.3385
	-0.42042	35.7122				-0.42042	45.1723
	-0.412412	35.5022				-0.412412	45.006
	-0.404404	35.2922				-0.404404	44.8398
	-0.396396	35.0822				-0.396396	44.6735
	-0.388388	34.8723				-0.388388	44.5072
	-0.38038	34.6623				-0.38038	44.341
	-0.372372	34.4523				-0.372372	44.1747
	-0.364364	34.2423				-0.364364	44.0085
	-0.356356	34.0324				-0.356356	43.8422
	-0.348348	33.8224				-0.348348	43.676
	-0.34034	33.6124				-0.34034	43.5097
	-0.332332	33.4024				-0.332332	43.3434
	-0.324324	33.1925				-0.324324	43.1772
	-0.316316	32.9825				-0.316316	43.0109
	-0.308308	32.7725				-0.308308	42.8447
	-0.3003	32.5625				-0.3003	42.6784
	-0.292292	32.3525				-0.292292	42.5122
	-0.284284	32.1426				-0.284284	42.3459
	-0.276276	31.9326				-0.276276	42.1797
	-0.268268	31.7226				-0.268268	42.0134
	-0.26026	31.5126				-0.26026	41.8471
	-0.252252	31.3027				-0.252252	41.6809
	-0.244244	31.0927				-0.244244	41.5146
	-0.236236	30.8827				-0.236236	41.3484
	-0.228228	30.6727				-0.228228	41.1821
	-0.22022	30.4628				-0.22022	41.0159
	-0.212212	30.2528				-0.212212	40.8496
	-0.204204	30.0428				-0.204204	40.6833
	-0.196196	29.8328				-0.196196	40.5171
	-0.188188	29.6229				-0.188188	40.3508
	-0.18018	29.4129				-0.18018	40.1846
	-0.172172	29.2029				-0.172172	40.0183
	-0.164164	28.9929				-0.164164	39.8521
	-0.156156	28.7829				-0.156156	39.6858
	-0.148148	28.573				-0.148148	39.5196
	-0.14014	28.363				-0.14014	39.3533
	-0.132132	28.153				-0.132132	39.187
	-0.124124	27.943				-0.124124	39.0208
	-0.116116	27.7331				-0.116116	38.8545
	-0.108108	27.5231				-0.108108	38.6883
	-0.1001	27.3131				-0.1001	38.522
	-0.0920921	27.1031				-0.0920921	38.3558
	-0.0840841	26.8932				-0.0840841	38.1895
	-0.0760761	26.6832				-0.0760761	38.0232
	-0.0680681	26.4732				-0.0680681	37.857
	-0.0600601	26.2632				-0.0600601	37.6907
	-0.0520521	26.0533				-0.0520521	37.5245
	-0.044044	25.8433				-0.044044	37.3582
	-0.036036	25.6333				-0.036036	37.192
	-0.028028	25.4233				-0.028028	37.0257
	-0.02002	25.2133				-0.02002	36.8594
	-0.012012	25.0034				-0.012012	36.6932
	-0.004004	24.7934				-0.004004	36.5269
	0.004004	24.5834				0.004004	36.3607
	0.012012	24.3734				0.012012	36.1944
	0.02002	24.1635				0.02002	36.0282
	0.028028	23.9535				0.028028	35.8619
	0.036036	23.7435				0.036036	35.6957
	0.044044	23.5335				0.044044	35.5294
	0.0520521	23.3236				0.0520521	35.3631
	0.0600601	23.1136				0.0600601	35.1969
	0.0680681	22.9036				0.0680681	35.0306
	0.0760761	22.6936				0.0760761	34.8644
	0.0840841	22.4837				0.0840841	34.6981
	0.0920921	22.2737				0.0920921	34.5319
	0.1001	22.0637				0.1001	34.3656
	0.108108	21.8537				0.108108	34.1993
	0.116116	21.6438				0.116116	34.0331
	0.124124	21.4338				0.124124	33.8668
	0.132132	21.2238				0.132132	33.7006
	0.14014	21.0138				0.14014	33.5343
	0.148148	20.8038				0.148148	33.3681
	0.156156	20.5939				0.156156	33.2018
	0.164164	20.3839				0.164164	33.0356
	0.172172	20.1739				0.172172	32.8693
	0.18018	19.9639				0.18018	32.703
	0.188188	19.754				0.188188	32.5368
	0.196196	19.544				0.196196	32.3705
	0.204204	19.334				0.204204	32.2043
	0.212212	19.124				0.212212	32.038
	0.22022	18.9141				0.22022	31.8718
	0.228228	18.7041				0.228228	31.7055
	0.236236	18.4941				0.236236	31.5392
	0.244244	18.2841				0.244244	31.373
	0.252252	18.0741				0.252252	31.2067
	0.26026	17.8642				0.26026	31.0405
	0.268268	17.6542				0.268268	30.8742
	0.276276	17.4442				0.276276	30.708
	0.284284	17.2342				0.284284	30.5417
	0.292292	17.0243				0.292292	30.3754
	0.3003	16.8143				0.3003	30.2092
	0.308308	16.6043				0.308308	30.0429
	0.316316	16.3943				0.316316	29.8767
	0.324324	16.1844				0.324324	29.7104
	0.332332	15.9744				0.332332	29.5442
	0.34034	15.7644				0.34034	29.3779
	0.348348	15.5544				0.348348	29.2116
	0.356356	15.3445				0.356356	29.0454
	0.364364	15.1345				0.364364	28.8791
	0.372372	14.9245				0.372372	28.7129
	0.38038	14.7145				0.38038	28.5466
	0.388388	14.5046				0.388388	28.3804
	0.396396	14.2946				0.396396	28.2141
	0.404404	14.0846				0.404404	28.0479
	0.412412	13.8746				0.412412	27.8816
	0.42042	13.6646				0.42042	27.7153
	0.428428	13.4547				0.428428	27.5491
	0.436436	13.2447				0.436436	27.3828
	0.444444	13.0347				0.444444	27.2166
	0.452452	12.8247				0.452452	27.0503
	0.46046	12.6148				0.46046	26.8841
	0.468468	12.4048				0.468468	26.7178
	0.476477	12.1948				0.476477	26.5515
	0.484484	11.9848				0.484484	26.3853
	0.492492	11.7749				0.492492	26.219
	0.500501	11.5649				0.500501	26.0528
	0.508509	11.3549				0.508509	25.8865
	0.516517	11.1449				0.516517	25.7203
	0.524524	10.935				0.524524	25.554
	0.532532	10.725				0.532532	25.3878
	0.54054	10.515				0.54054	25.2215
	0.548548	10.305				0.548548	25.0552
	0.556557	10.095				0.556557	24.889
	0.564565	9.88507				0.564565	24.7227
	0.572573	9.67509				0.572573	24.5565
	0.580581	9.46512				0.580581	24.3902
	0.588589	9.25514				0.588589	24.224
	0.596597	9.04516				0.596597	24.0577
	0.604605	8.83518				0.604605	23.8914
	0.612613	8.62521				0.612613	23.7252
	0.620621	8.41523				0.620621	23.5589
	0.628629	8.20526				0.628629	23.3927
	0.636637	7.99528				0.636637	23.2264
	0.644645	7.7853				0.644645	23.0602
	0.652653	7.57533				0.652653	22.8939
	0.660661	7.36535				0.660661	22.7277
	0.668669	7.15537				0.668669	22.5614
	0.676677	6.9454				0.676677	22.3951
	0.684685	6.73542				0.684685	22.2289
	0.692693	6.52544				0.692693	22.0626
	0.700701	6.31547				0.700701	21.8964
	0.708709	6.10549				0.708709	21.7301
	0.716717	5.89551				0.716717	21.5639
	0.724725	5.68554				0.724725	21.3976
	0.732733	5.47556				0.732733	21.2313
	0.740741	5.26559				0.740741	21.0651
	0.748749	5.05561				0.748749	20.8988
	0.756757	4.84563				0.756757	20.7326
	0.764765	4.63566				0.764765	20.5663
	0.772773	4.42568				0.772773	20.4001
	0.780781	4.2157				0.780781	20.2338
	0.788789	4.00573				0.788789	20.0675
	0.796797	3.79575				0.796797	19.9013
	0.804805	3.58577				0.804805	19.735
	0.812813	3.3758				0.812813	19.5688
	0.820821	3.16582				0.820821	19.4025
	0.828829	2.95584				0.828829	19.2363
	0.836837	2.74587				0.836837	19.07
	0.844845	2.53589				0.844845	18.9037
	0.852853	2.32592				0.852853	18.7375
	0.860861	2.11594				0.860861	18.5712
	0.868869	1.90596				0.868869	18.405
	0.876877	1.69599				0.876877	18.2387
	0.884885	1.48601				0.884885	18.0725
	0.892893	1.27603				0.892893	17.9062
	0.900901	1.06606				0.900901	17.74
	0.908909	0.85608				0.908909	17.5737
	0.916917	0.646104				0.916917	17.4074
	0.924925	0.436127				0.924925	17.2412
	0.932933	0.226151				0.932933	17.0749
	0.940941	0.0161743				0.940941	16.9087
	0.948949	-0.193802				0.948949	16.7424
	0.956957	-0.403779				0.956957	16.5762
	0.964965	-0.613755				0.964965	16.4099
	0.972973	-0.823732				0.972973	16.2436
	0.980981	-1.03371				0.980981	16.0774
	0.988989	-1.24368				0.988989	15.9111
	0.996997	-1.45366				0.996997	15.7449
	1.005	-1.66364				1.005	15.5786
	1.01301	-1.87361				1.01301	15.4124
	1.02102	-2.08359				1.02102	15.2461
	1.02903	-2.29357				1.02903	15.0799
	1.03704	-2.50354				1.03704	14.9136
	1.04505	-2.71352				1.04505	14.7473
	1.05305	-2.9235				1.05305	14.5811
	1.06106	-3.13347				1.06106	14.4148
	1.06907	-3.34345				1.06907	14.2486
	1.07708	-3.55343				1.07708	14.0823
	1.08509	-3.7634				1.08509	13.9161
	1.09309	-3.97338				1.09309	13.7498
	1.1011	-4.18335				1.1011	13.5835
	1.10911	-4.39333				1.10911	13.4173
	1.11712	-4.60331				1.11712	13.251
	1.12513	-4.81328				1.12513	13.0848
	1.13313	-5.02326				1.13313	12.9185
	1.14114	-5.23324				1.14114	12.7523
	1.14915	-5.44321				1.14915	12.586
	1.15716	-5.65319				1.15716	12.4197
	1.16517	-5.86317				1.16517	12.2535
	1.17317	-6.07314				1.17317	12.0872
	1.18118	-6.28312				1.18118	11.921
	1.18919	-6.4931				1.18919	11.7547
	1.1972	-6.70307				1.1972	11.5885
	1.20521	-6.91305				1.20521	11.4222
	1.21321	-7.12303				1.21321	11.256
	1.22122	-7.333				1.22122	11.0897
	1.22923	-7.54298				1.22923	10.9234
	1.23724	-7.75295				1.23724	10.7572
	1.24525	-7.96293				1.24525	10.5909
	1.25325	-8.17291				1.25325	10.4247
	1.26126	-8.38288				1.26126	10.2584
	1.26927	-8.59286				1.26927	10.0922
	1.27728	-8.80284				1.27728	9.9259
	1.28529	-9.01281				1.28529	9.75965
	1.29329	-9.22279				1.29329	9.59339
	1.3013	-9.43277				1.3013	9.42713
	1.30931	-9.64274				1.30931	9.26088
	1.31732	-9.85272				1.31732	9.09462
	1.32533	-10.0627				1.32533	8.92836
	1.33333	-10.2727				1.33333	8.76211
	1.34134	-10.4826				1.34134	8.59585
	1.34935	-10.6926				1.34935	8.42959
	1.35736	-10.9026				1.35736	8.26334
	1.36537	-11.1126				1.36537	8.09708
	1.37337	-11.3226				1.37337	7.93082
	1.38138	-11.5325				1.38138	7.76457
	1.38939	-11.7425				1.38939	7.59831
	1.3974	-11.9525				1.3974	7.43206
	1.40541	-12.1625				1.40541	7.2658
	1.41341	-12.3724				1.41341	7.09954
	1.42142	-12.5824				1.42142	6.93329
	1.42943	-12.7924				1.42943	6.76703
	1.43744	-13.0024				1.43744	6.60077
	1.44545	-13.2123				1.44545	6.43452
	1.45345	-13.4223				1.45345	6.26826
	1.46146	-13.6323				1.46146	6.102
	1.46947	-13.8423				1.46947	5.93575
	1.47748	-14.0522				1.47748	5.76949
	1.48549	-14.2622				1.48549	5.60323
	1.49349	-14.4722				1.49349	5.43698
	1.5015	-14.6822				1.5015	5.27072
	1.50951	-14.8922				1.50951	5.10446
	1.51752	-15.1021				1.51752	4.93821
	1.52553	-15.3121				1.52553	4.77195
	1.53353	-15.5221				1.53353	4.6057
	1.54154	-15.7321				1.54154	4.43944
	1.54955	-15.942				1.54955	4.27318
	1.55756	-16.152				1.55756	4.10693
	1.56557	-16.362				1.56557	3.94067
	1.57357	-16.572				1.57357	3.77441
	1.58158	-16.7819				1.58158	3.60816
	1.58959	-16.9919				1.58959	3.4419
	1.5976	-17.2019				1.5976	3.27564
	1.60561	-17.4119				1.60561	3.10939
	1.61361	-17.6218				1.61361	2.94313
	1.62162	-17.8318				1.62162	2.77687
	1.62963	-18.0418				1.62963	2.61062
	1.63764	-18.2518				1.63764	2.44436
	1.64565	-18.4618				1.64565	2.27811
	1.65365	-18.6717				1.65365	2.11185
	1.66166	-18.8817				1.66166	1.94559
	1.66967	-19.0917				1.66967	1.77934
	1.67768	-19.3017				1.67768	1.61308
	1.68569	-19.5116				1.68569	1.44682
	1.69369	-19.7216				1.69369	1.28057
	1.7017	-19.9316				1.7017	1.11431
	1.70971	-20.1416				1.70971	0.948053
	1.71772	-20.3515				1.71772	0.781797
	1.72573	-20.5615				1.72573	0.61554
	1.73373	-20.7715				1.73373	0.449284
	1.74174	-20.9815				1.74174	0.283027
	1.74975	-21.1914				1.74975	0.116771
	1.75776	-21.4014				1.75776	-0.0494855
	1.76577	-21.6114				1.76577	-0.215742
	1.77377	-21.8214				1.77377	-0.381998
	1.78178	-22.0314				1.78178	-0.548255
	1.78979	-22.2413				1.78979	-0.714511
	1.7978	-22.4513				1.7978	-0.880768
	1.80581	-22.6613				1.80581	-1.04702
	1.81381	-22.8713				1.81381	-1.21328
	1.82182	-23.0812				1.82182	-1.37954
	1.82983	-23.2912				1.82983	-1.54579
	1.83784	-23.5012				1.83784	-1.71205
	1.84585	-23.7112				1.84585	-1.87831
	1.85385	-23.9211				1.85385	-2.04456
	1.86186	-24.1311				1.86186	-2.21082
	1.86987	-24.3411				1.86987	-2.37708
	1.87788	-24.5511				1.87788	-2.54333
	1.88589	-24.761				1.88589	-2.70959
	1.89389	-24.971				1.89389	-2.87585
	1.9019	-25.181				1.9019	-3.0421
	1.90991	-25.391				1.90991	-3.20836
	1.91792	-25.601				1.91792	-3.37461
	1.92593	-25.8109				1.92593	-3.54087
	1.93393	-26.0209				1.93393	-3.70713
	1.94194	-26.2309				1.94194	-3.87338
	1.94995	-26.4409				1.94995	-4.03964
	1.95796	-26.6508				1.95796	-4.2059
	1.96597	-26.8608				1.96597	-4.37215
	1.97397	-27.0708				1.97397	-4.53841
	1.98198	-27.2808				1.98198	-4.70467
	1.98999	-27.4907				1.98999	-4.87092
	1.998	-27.7007				1.998	-5.03718
	2.00601	-27.9107				2.00601	-5.20344
	2.01401	-28.1207				2.01401	-5.36969
	2.02202	-28.3306				2.02202	-5.53595
	2.03003	-28.5406				2.03003	-5.7022
	2.03804	-28.7506				2.03804	-5.86846
	2.04605	-28.9606				2.04605	-6.03472
	2.05405	-29.1706				2.05405	-6.20097
	2.06206	-29.3805				2.06206	-6.36723
	2.07007	-29.5905				2.07007	-6.53349
	2.07808	-29.8005				2.07808	-6.69974
	2.08609	-30.0105				2.08609	-6.866
	2.09409	-30.2204				2.09409	-7.03226
	2.1021	-30.4304				2.1021	-7.19851
	2.11011	-30.6404				2.11011	-7.36477
	2.11812	-30.8504				2.11812	-7.53103
	2.12613	-31.0603				2.12613	-7.69728
	2.13413	-31.2703				2.13413	-7.86354
	2.14214	-31.4803				2.14214	-8.0298
	2.15015	-31.6903				2.15015	-8.19605
	2.15816	-31.9002				2.15816	-8.36231
	2.16617	-32.1102				2.16617	-8.52856
	2.17417	-32.3202				2.17417	-8.69482
	2.18218	-32.5302				2.18218	-8.86108
	2.19019	-32.7402				2.19019	-9.02733
	2.1982	-32.9501				2.1982	-9.19359
	2.20621	-33.1601				2.20621	-9.35985
	2.21421	-33.3701				2.21421	-9.5261
	2.22222	-33.5801				2.22222	-9.69236
	2.23023	-33.79				2.23023	-9.85862
	2.23824	-34				2.23824	-10.0249
	2.24625	-34.21				2.24625	-10.1911
	2.25425	-34.42				2.25425	-10.3574
	2.26226	-34.6299				2.26226	-10.5236
	2.27027	-34.8399				2.27027	-10.6899
	2.27828	-35.0499				2.27828	-10.8562
	2.28629	-35.2599				2.28629	-11.0224
	2.29429	-35.4698				2.29429	-11.1887
	2.3023	-35.6798				2.3023	-11.3549
	2.31031	-35.8898				2.31031	-11.5212
	2.31832	-36.0998				2.31832	-11.6874
	2.32633	-36.3098				2.32633	-11.8537
	2.33433	-36.5197				2.33433	-12.0199
	2.34234	-36.7297				2.34234	-12.1862
	2.35035	-36.9397				2.35035	-12.3525
	2.35836	-37.1497				2.35836	-12.5187
	2.36637	-37.3596				2.36637	-12.685
	2.37437	-37.5696				2.37437	-12.8512
	2.38238	-37.7796				2.38238	-13.0175
	2.39039	-37.9896				2.39039	-13.1837
	2.3984	-38.1995				2.3984	-13.35
	2.40641	-38.4095				2.40641	-13.5163
	2.41441	-38.6195				2.41441	-13.6825
	2.42242	-38.8295				2.42242	-13.8488
	2.43043	-39.0394				2.43043	-14.015
	2.43844	-39.2494				2.43844	-14.1813
	2.44645	-39.4594				2.44645	-14.3475
	2.45445	-39.6694				2.45445	-14.5138
	2.46246	-39.8794				2.46246	-14.6801
	2.47047	-40.0893				2.47047	-14.8463
	2.47848	-40.2993				2.47848	-15.0126
	2.48649	-40.5093				2.48649	-15.1788
	2.49449	-40.7193				2.49449	-15.3451
	2.5025	-40.9292				2.5025	-15.5113
	2.51051	-41.1392				2.51051	-15.6776
	2.51852	-41.3492				2.51852	-15.8438
	2.52653	-41.5592				2.52653	-16.0101
	2.53453	-41.7691				2.53453	-16.1764
	2.54254	-41.9791				2.54254	-16.3426
	2.55055	-42.1891				2.55055	-16.5089
	2.55856	-42.3991				2.55856	-16.6751
	2.56657	-42.609				2.56657	-16.8414
	2.57457	-42.819				2.57457	-17.0076
	2.58258	-43.029				2.58258	-17.1739
	2.59059	-43.239				2.59059	-17.3402
	2.5986	-43.449				2.5986	-17.5064
	2.60661	-43.6589				2.60661	-17.6727
	2.61461	-43.8689				2.61461	-17.8389
	2.62262	-44.0789				2.62262	-18.0052
	2.63063	-44.2889				2.63063	-18.1714
	2.63864	-44.4988				2.63864	-18.3377
	2.64665	-44.7088				2.64665	-18.504
	2.65465	-44.9188				2.65465	-18.6702
	2.66266	-45.1288				2.66266	-18.8365
	2.67067	-45.3387				2.67067	-19.0027
	2.67868	-45.5487				2.67868	-19.169
	2.68669	-45.7587				2.68669	-19.3352
	2.69469	-45.9687				2.69469	-19.5015
	2.7027	-46.1786				2.7027	-19.6677
	2.71071	-46.3886				2.71071	-19.834
	2.71872	-46.5986				2.71872	-20.0003
	2.72673	-46.8086				2.72673	-20.1665
	2.73473	-47.0185				2.73473	-20.3328
	2.74274	-47.2285				2.74274	-20.499
	2.75075	-47.4385				2.75075	-20.6653
	2.75876	-47.6485				2.75876	-20.8315
	2.76677	-47.8585				2.76677	-20.9978
	2.77477	-48.0684				2.77477	-21.1641
	2.78278	-48.2784				2.78278	-21.3303
	2.79079	-48.4884				2.79079	-21.4966
	2.7988	-48.6984				2.7988	-21.6628
	2.80681	-48.9083				2.80681	-21.8291
	2.81481	-49.1183				2.81481	-21.9953
	2.82282	-49.3283				2.82282	-22.1616
	2.83083	-49.5383				2.83083	-22.3279
	2.83884	-49.7482				2.83884	-22.4941
	2.84685	-49.9582				2.84685	-22.6604
	2.85485	-50.1682				2.85485	-22.8266
	2.86286	-50.3782				2.86286	-22.9929
	2.87087	-50.5881				2.87087	-23.1591
	2.87888	-50.7981				2.87888	-23.3254
	2.88689	-51.0081				2.88689	-23.4916
	2.89489	-51.2181				2.89489	-23.6579
	2.9029	-51.4281				2.9029	-23.8242
	2.91091	-51.638				2.91091	-23.9904
	2.91892	-51.848				2.91892	-24.1567
	2.92693	-52.058				2.92693	-24.3229
	2.93493	-52.268				2.93493	-24.4892
	2.94294	-52.4779				2.94294	-24.6554
	2.95095	-52.6879				2.95095	-24.8217
	2.95896	-52.8979				2.95896	-24.988
	2.96697	-53.1079				2.96697	-25.1542
	2.97497	-53.3178				2.97497	-25.3205
	2.98298	-53.5278				2.98298	-25.4867
	2.99099	-53.7378				2.99099	-25.653
	2.999	-53.9478				2.999	-25.8192
	3.00701	-54.1578				3.00701	-25.9855
	3.01502	-54.3677				3.01502	-26.1517
	3.02302	-54.5777				3.02302	-26.318
	3.03103	-54.7877				3.03103	-26.4843
	3.03904	-54.9977				3.03904	-26.6505
	3.04705	-55.2076				3.04705	-26.8168
	3.05506	-55.4176				3.05506	-26.983
	3.06306	-55.6276				3.06306	-27.1493
	3.07107	-55.8376				3.07107	-27.3155
	3.07908	-56.0475				3.07908	-27.4818
	3.08709	-56.2575				3.08709	-27.6481
	3.0951	-56.4675				3.0951	-27.8143
	3.1031	-56.6775				3.1031	-27.9806
	3.11111	-56.8874				3.11111	-28.1468
	3.11912	-57.0974				3.11912	-28.3131
	3.12713	-57.3074				3.12713	-28.4793
	3.13514	-57.5174				3.13514	-28.6456
	3.14314	-57.7274				3.14314	-28.8119
	3.15115	-57.9373				3.15115	-28.9781
	3.15916	-58.1473				3.15916	-29.1444
	3.16717	-58.3573				3.16717	-29.3106
	3.17518	-58.5673				3.17518	-29.4769
	3.18318	-58.7772				3.18318	-29.6431
	3.19119	-58.9872				3.19119	-29.8094
	3.1992	-59.1972				3.1992	-29.9756
	3.20721	-59.4072				3.20721	-30.1419
	3.21522	-59.6171				3.21522	-30.3082
	3.22322	-59.8271				3.22322	-30.4744
	3.23123	-60.0371				3.23123	-30.6407
	3.23924	-60.2471				3.23924	-30.8069
	3.24725	-60.457				3.24725	-30.9732
	3.25526	-60.667				3.25526	-31.1394
	3.26326	-60.877				3.26326	-31.3057
	3.27127	-61.087				3.27127	-31.472
	3.27928	-61.297				3.27928	-31.6382
	3.28729	-61.5069				3.28729	-31.8045
	3.2953	-61.7169				3.2953	-31.9707
	3.3033	-61.9269				3.3033	-32.137
	3.31131	-62.1369				3.31131	-32.3032
	3.31932	-62.3468				3.31932	-32.4695
	3.32733	-62.5568				3.32733	-32.6358
	3.33534	-62.7668				3.33534	-32.802
	3.34334	-62.9768				3.34334	-32.9683
	3.35135	-63.1867				3.35135	-33.1345
	3.35936	-63.3967				3.35936	-33.3008
	3.36737	-63.6067				3.36737	-33.467
	3.37538	-63.8167				3.37538	-33.6333
	3.38338	-64.0266				3.38338	-33.7995
	3.39139	-64.2366				3.39139	-33.9658
	3.3994	-64.4466				3.3994	-34.1321
	3.40741	-64.6566				3.40741	-34.2983
	3.41542	-64.8666				3.41542	-34.4646
	3.42342	-65.0765				3.42342	-34.6308
	3.43143	-65.2865				3.43143	-34.7971
	3.43944	-65.4965				3.43944	-34.9633
	3.44745	-65.7065				3.44745	-35.1296
	3.45546	-65.9164				3.45546	-35.2959
	3.46346	-66.1264				3.46346	-35.4621
	3.47147	-66.3364				3.47147	-35.6284
	3.47948	-66.5464				3.47948	-35.7946
	3.48749	-66.7563				3.48749	-35.9609
	3.4955	-66.9663				3.4955	-36.1271
	3.5035	-67.1763				3.5035	-36.2934
	3.51151	-67.3863				3.51151	-36.4597
	3.51952	-67.5962				3.51952	-36.6259
	3.52753	-67.8062				3.52753	-36.7922
	3.53554	-68.0162				3.53554	-36.9584
	3.54354	-68.2262				3.54354	-37.1247
	3.55155	-68.4361				3.55155	-37.2909
	3.55956	-68.6461				3.55956	-37.4572
	3.56757	-68.8561				3.56757	-37.6234
	3.57558	-69.0661				3.57558	-37.7897
	3.58358	-69.2761				3.58358	-37.956
	3.59159	-69.486				3.59159	-38.1222
	3.5996	-69.696				3.5996	-38.2885
	3.60761	-69.906				3.60761	-38.4547
	3.61562	-70.116				3.61562	-38.621
	3.62362	-70.3259				3.62362	-38.7872
	3.63163	-70.5359				3.63163	-38.9535
	3.63964	-70.7459				3.63964	-39.1198
	3.64765	-70.9559				3.64765	-39.286
	3.65566	-71.1658				3.65566	-39.4523
	3.66366	-71.3758				3.66366	-39.6185
	3.67167	-71.5858				3.67167	-39.7848
	3.67968	-71.7958				3.67968	-39.951
	3.68769	-72.0058				3.68769	-40.1173
	3.6957	-72.2157				3.6957	-40.2835
	3.7037	-72.4257				3.7037	-40.4498
	3.71171	-72.6357				3.71171	-40.6161
	3.71972	-72.8457				3.71972	-40.7823
	3.72773	-73.0556				3.72773	-40.9486
	3.73574	-73.2656				3.73574	-41.1148
	3.74374	-73.4756				3.74374	-41.2811
	3.75175	-73.6856				3.75175	-41.4473
	3.75976	-73.8955				3.75976	-41.6136
	3.76777	-74.1055				3.76777	-41.7799
	3.77578	-74.3155				3.77578	-41.9461
	3.78378	-74.5255				3.78378	-42.1124
	3.79179	-74.7354				3.79179	-42.2786
	3.7998	-74.9454				3.7998	-42.4449
	3.80781	-75.1554				3.80781	-42.6111
	3.81582	-75.3654				3.81582	-42.7774
	3.82382	-75.5754				3.82382	-42.9436
	3.83183	-75.7853				3.83183	-43.1099
	3.83984	-75.9953				3.83984	-43.2762
	3.84785	-76.2053				3.84785	-43.4424
	3.85586	-76.4153				3.85586	-43.6087
	3.86386	-76.6252				3.86386	-43.7749
	3.87187	-76.8352				3.87187	-43.9412
	3.87988	-77.0452				3.87988	-44.1074
	3.88789	-77.2552				3.88789	-44.2737
	3.8959	-77.4651				3.8959	-44.44
	3.9039	-77.6751				3.9039	-44.6062
	3.91191	-77.8851				3.91191	-44.7725
	3.91992	-78.0951				3.91992	-44.9387
	3.92793	-78.305				3.92793	-45.105
	3.93594	-78.515				3.93594	-45.2712
	3.94394	-78.725				3.94394	-45.4375
	3.95195	-78.935				3.95195	-45.6038
	3.95996	-79.1449				3.95996	-45.77
	3.96797	-79.3549				3.96797	-45.9363
	3.97598	-79.5649				3.97598	-46.1025
	3.98398	-79.7749				3.98398	-46.2688
	3.99199	-79.9849				3.99199	-46.435
	4	-80.1948				4	-46.6013

## Sheet: Fig.3i
	in-group	out-group
A-K	1.16	1.84
K-L	1.48	1.46
L-C	0.76	1.56
L-A	2.64	3.3
K-C	2.24	3.02
A-C	3.4	4.86
