# Supplementary material for: Multi-dimensional social relationships shape social attention in monkeys
Source: eLife. 2025 Mar 7;14:RP104460. doi: 10.7554/eLife.104460 (PMC11888598; doi:10.7554/eLife.104460)
Supplement: Figure 4—source data 1. [file elife-104460-fig4-data1.xlsx]

## Sheet: Fig.4a
in-group	mean	errorbar
saline	23.7514	4.57668
OT	26.0331	4.32348
out-group	mean	errorbar
saline	29.625	4.28555
OT	34.4213	3.95654

## Sheet: Fig.4f
	in-group	out-group
aggression	0.5	0.555556
grooming	0.395349	0.510638
proximity	0.441176	0.558824

## Sheet: Fig.4g
	aggression	grooming	proximity
OT	0.04	0.34	0.3
saline	0.08	0.86	0.68

## Sheet: Fig.4h
	aggression	grooming	proximity
OT	0.1	0.48	0.38
saline	0.18	0.94	0.68

## Sheet: Fig.4i
saline	social engagement index	distractor bias (ms)	errorbar		OT	social engagement index	distractor bias (ms)	errorbar
	-1.7	68.0637	21.9222			-0.72	69.5516	16.2262
	-0.34	32.6308	17.5128			-0.12	33.3256	16.0205
	1.12	-5.32747	15.9335			0.42	0.400999	18.3696
	0.92	-0.361343	11.3208			0.42	0.854132	10.8307
fitted curve	social engagement index	distractor bias (ms)			fitted curve	social engagement index	distractor bias (ms)
	-4	128.014				-4	267.899
	-3.99199	127.806				-3.99199	267.414
	-3.98398	127.597				-3.98398	266.93
	-3.97598	127.388				-3.97598	266.446
	-3.96797	127.179				-3.96797	265.962
	-3.95996	126.971				-3.95996	265.478
	-3.95195	126.762				-3.95195	264.993
	-3.94394	126.553				-3.94394	264.509
	-3.93594	126.344				-3.93594	264.025
	-3.92793	126.136				-3.92793	263.541
	-3.91992	125.927				-3.91992	263.057
	-3.91191	125.718				-3.91191	262.572
	-3.9039	125.509				-3.9039	262.088
	-3.8959	125.301				-3.8959	261.604
	-3.88789	125.092				-3.88789	261.12
	-3.87988	124.883				-3.87988	260.635
	-3.87187	124.674				-3.87187	260.151
	-3.86386	124.466				-3.86386	259.667
	-3.85586	124.257				-3.85586	259.183
	-3.84785	124.048				-3.84785	258.699
	-3.83984	123.84				-3.83984	258.214
	-3.83183	123.631				-3.83183	257.73
	-3.82382	123.422				-3.82382	257.246
	-3.81582	123.213				-3.81582	256.762
	-3.80781	123.005				-3.80781	256.278
	-3.7998	122.796				-3.7998	255.793
	-3.79179	122.587				-3.79179	255.309
	-3.78378	122.378				-3.78378	254.825
	-3.77578	122.17				-3.77578	254.341
	-3.76777	121.961				-3.76777	253.856
	-3.75976	121.752				-3.75976	253.372
	-3.75175	121.543				-3.75175	252.888
	-3.74374	121.335				-3.74374	252.404
	-3.73574	121.126				-3.73574	251.92
	-3.72773	120.917				-3.72773	251.435
	-3.71972	120.709				-3.71972	250.951
	-3.71171	120.5				-3.71171	250.467
	-3.7037	120.291				-3.7037	249.983
	-3.6957	120.082				-3.6957	249.499
	-3.68769	119.874				-3.68769	249.014
	-3.67968	119.665				-3.67968	248.53
	-3.67167	119.456				-3.67167	248.046
	-3.66366	119.247				-3.66366	247.562
	-3.65566	119.039				-3.65566	247.077
	-3.64765	118.83				-3.64765	246.593
	-3.63964	118.621				-3.63964	246.109
	-3.63163	118.412				-3.63163	245.625
	-3.62362	118.204				-3.62362	245.141
	-3.61562	117.995				-3.61562	244.656
	-3.60761	117.786				-3.60761	244.172
	-3.5996	117.578				-3.5996	243.688
	-3.59159	117.369				-3.59159	243.204
	-3.58358	117.16				-3.58358	242.72
	-3.57558	116.951				-3.57558	242.235
	-3.56757	116.743				-3.56757	241.751
	-3.55956	116.534				-3.55956	241.267
	-3.55155	116.325				-3.55155	240.783
	-3.54354	116.116				-3.54354	240.298
	-3.53554	115.908				-3.53554	239.814
	-3.52753	115.699				-3.52753	239.33
	-3.51952	115.49				-3.51952	238.846
	-3.51151	115.281				-3.51151	238.362
	-3.5035	115.073				-3.5035	237.877
	-3.4955	114.864				-3.4955	237.393
	-3.48749	114.655				-3.48749	236.909
	-3.47948	114.447				-3.47948	236.425
	-3.47147	114.238				-3.47147	235.94
	-3.46346	114.029				-3.46346	235.456
	-3.45546	113.82				-3.45546	234.972
	-3.44745	113.612				-3.44745	234.488
	-3.43944	113.403				-3.43944	234.004
	-3.43143	113.194				-3.43143	233.519
	-3.42342	112.985				-3.42342	233.035
	-3.41542	112.777				-3.41542	232.551
	-3.40741	112.568				-3.40741	232.067
	-3.3994	112.359				-3.3994	231.583
	-3.39139	112.15				-3.39139	231.098
	-3.38338	111.942				-3.38338	230.614
	-3.37538	111.733				-3.37538	230.13
	-3.36737	111.524				-3.36737	229.646
	-3.35936	111.316				-3.35936	229.161
	-3.35135	111.107				-3.35135	228.677
	-3.34334	110.898				-3.34334	228.193
	-3.33534	110.689				-3.33534	227.709
	-3.32733	110.481				-3.32733	227.225
	-3.31932	110.272				-3.31932	226.74
	-3.31131	110.063				-3.31131	226.256
	-3.3033	109.854				-3.3033	225.772
	-3.2953	109.646				-3.2953	225.288
	-3.28729	109.437				-3.28729	224.804
	-3.27928	109.228				-3.27928	224.319
	-3.27127	109.019				-3.27127	223.835
	-3.26326	108.811				-3.26326	223.351
	-3.25526	108.602				-3.25526	222.867
	-3.24725	108.393				-3.24725	222.382
	-3.23924	108.184				-3.23924	221.898
	-3.23123	107.976				-3.23123	221.414
	-3.22322	107.767				-3.22322	220.93
	-3.21522	107.558				-3.21522	220.446
	-3.20721	107.35				-3.20721	219.961
	-3.1992	107.141				-3.1992	219.477
	-3.19119	106.932				-3.19119	218.993
	-3.18318	106.723				-3.18318	218.509
	-3.17518	106.515				-3.17518	218.025
	-3.16717	106.306				-3.16717	217.54
	-3.15916	106.097				-3.15916	217.056
	-3.15115	105.888				-3.15115	216.572
	-3.14314	105.68				-3.14314	216.088
	-3.13514	105.471				-3.13514	215.603
	-3.12713	105.262				-3.12713	215.119
	-3.11912	105.053				-3.11912	214.635
	-3.11111	104.845				-3.11111	214.151
	-3.1031	104.636				-3.1031	213.667
	-3.0951	104.427				-3.0951	213.182
	-3.08709	104.219				-3.08709	212.698
	-3.07908	104.01				-3.07908	212.214
	-3.07107	103.801				-3.07107	211.73
	-3.06306	103.592				-3.06306	211.245
	-3.05506	103.384				-3.05506	210.761
	-3.04705	103.175				-3.04705	210.277
	-3.03904	102.966				-3.03904	209.793
	-3.03103	102.757				-3.03103	209.309
	-3.02302	102.549				-3.02302	208.824
	-3.01502	102.34				-3.01502	208.34
	-3.00701	102.131				-3.00701	207.856
	-2.999	101.922				-2.999	207.372
	-2.99099	101.714				-2.99099	206.888
	-2.98298	101.505				-2.98298	206.403
	-2.97497	101.296				-2.97497	205.919
	-2.96697	101.088				-2.96697	205.435
	-2.95896	100.879				-2.95896	204.951
	-2.95095	100.67				-2.95095	204.466
	-2.94294	100.461				-2.94294	203.982
	-2.93493	100.253				-2.93493	203.498
	-2.92693	100.044				-2.92693	203.014
	-2.91892	99.8351				-2.91892	202.53
	-2.91091	99.6264				-2.91091	202.045
	-2.9029	99.4176				-2.9029	201.561
	-2.89489	99.2089				-2.89489	201.077
	-2.88689	99.0002				-2.88689	200.593
	-2.87888	98.7914				-2.87888	200.109
	-2.87087	98.5827				-2.87087	199.624
	-2.86286	98.374				-2.86286	199.14
	-2.85485	98.1652				-2.85485	198.656
	-2.84685	97.9565				-2.84685	198.172
	-2.83884	97.7478				-2.83884	197.687
	-2.83083	97.539				-2.83083	197.203
	-2.82282	97.3303				-2.82282	196.719
	-2.81481	97.1216				-2.81481	196.235
	-2.80681	96.9128				-2.80681	195.751
	-2.7988	96.7041				-2.7988	195.266
	-2.79079	96.4954				-2.79079	194.782
	-2.78278	96.2866				-2.78278	194.298
	-2.77477	96.0779				-2.77477	193.814
	-2.76677	95.8692				-2.76677	193.33
	-2.75876	95.6604				-2.75876	192.845
	-2.75075	95.4517				-2.75075	192.361
	-2.74274	95.2429				-2.74274	191.877
	-2.73473	95.0342				-2.73473	191.393
	-2.72673	94.8255				-2.72673	190.908
	-2.71872	94.6167				-2.71872	190.424
	-2.71071	94.408				-2.71071	189.94
	-2.7027	94.1993				-2.7027	189.456
	-2.69469	93.9905				-2.69469	188.972
	-2.68669	93.7818				-2.68669	188.487
	-2.67868	93.5731				-2.67868	188.003
	-2.67067	93.3643				-2.67067	187.519
	-2.66266	93.1556				-2.66266	187.035
	-2.65465	92.9469				-2.65465	186.55
	-2.64665	92.7381				-2.64665	186.066
	-2.63864	92.5294				-2.63864	185.582
	-2.63063	92.3207				-2.63063	185.098
	-2.62262	92.1119				-2.62262	184.614
	-2.61461	91.9032				-2.61461	184.129
	-2.60661	91.6945				-2.60661	183.645
	-2.5986	91.4857				-2.5986	183.161
	-2.59059	91.277				-2.59059	182.677
	-2.58258	91.0683				-2.58258	182.193
	-2.57457	90.8595				-2.57457	181.708
	-2.56657	90.6508				-2.56657	181.224
	-2.55856	90.4421				-2.55856	180.74
	-2.55055	90.2333				-2.55055	180.256
	-2.54254	90.0246				-2.54254	179.772
	-2.53453	89.8159				-2.53453	179.287
	-2.52653	89.6071				-2.52653	178.803
	-2.51852	89.3984				-2.51852	178.319
	-2.51051	89.1897				-2.51051	177.835
	-2.5025	88.9809				-2.5025	177.35
	-2.49449	88.7722				-2.49449	176.866
	-2.48649	88.5635				-2.48649	176.382
	-2.47848	88.3547				-2.47848	175.898
	-2.47047	88.146				-2.47047	175.414
	-2.46246	87.9373				-2.46246	174.929
	-2.45445	87.7285				-2.45445	174.445
	-2.44645	87.5198				-2.44645	173.961
	-2.43844	87.311				-2.43844	173.477
	-2.43043	87.1023				-2.43043	172.992
	-2.42242	86.8936				-2.42242	172.508
	-2.41441	86.6848				-2.41441	172.024
	-2.40641	86.4761				-2.40641	171.54
	-2.3984	86.2674				-2.3984	171.056
	-2.39039	86.0586				-2.39039	170.571
	-2.38238	85.8499				-2.38238	170.087
	-2.37437	85.6412				-2.37437	169.603
	-2.36637	85.4324				-2.36637	169.119
	-2.35836	85.2237				-2.35836	168.635
	-2.35035	85.015				-2.35035	168.15
	-2.34234	84.8062				-2.34234	167.666
	-2.33433	84.5975				-2.33433	167.182
	-2.32633	84.3888				-2.32633	166.698
	-2.31832	84.18				-2.31832	166.213
	-2.31031	83.9713				-2.31031	165.729
	-2.3023	83.7626				-2.3023	165.245
	-2.29429	83.5538				-2.29429	164.761
	-2.28629	83.3451				-2.28629	164.277
	-2.27828	83.1364				-2.27828	163.792
	-2.27027	82.9276				-2.27027	163.308
	-2.26226	82.7189				-2.26226	162.824
	-2.25425	82.5102				-2.25425	162.34
	-2.24625	82.3014				-2.24625	161.856
	-2.23824	82.0927				-2.23824	161.371
	-2.23023	81.8839				-2.23023	160.887
	-2.22222	81.6752				-2.22222	160.403
	-2.21421	81.4665				-2.21421	159.919
	-2.20621	81.2578				-2.20621	159.434
	-2.1982	81.049				-2.1982	158.95
	-2.19019	80.8403				-2.19019	158.466
	-2.18218	80.6315				-2.18218	157.982
	-2.17417	80.4228				-2.17417	157.498
	-2.16617	80.2141				-2.16617	157.013
	-2.15816	80.0053				-2.15816	156.529
	-2.15015	79.7966				-2.15015	156.045
	-2.14214	79.5879				-2.14214	155.561
	-2.13413	79.3791				-2.13413	155.077
	-2.12613	79.1704				-2.12613	154.592
	-2.11812	78.9617				-2.11812	154.108
	-2.11011	78.7529				-2.11011	153.624
	-2.1021	78.5442				-2.1021	153.14
	-2.09409	78.3355				-2.09409	152.655
	-2.08609	78.1267				-2.08609	152.171
	-2.07808	77.918				-2.07808	151.687
	-2.07007	77.7093				-2.07007	151.203
	-2.06206	77.5005				-2.06206	150.719
	-2.05405	77.2918				-2.05405	150.234
	-2.04605	77.0831				-2.04605	149.75
	-2.03804	76.8743				-2.03804	149.266
	-2.03003	76.6656				-2.03003	148.782
	-2.02202	76.4569				-2.02202	148.297
	-2.01401	76.2481				-2.01401	147.813
	-2.00601	76.0394				-2.00601	147.329
	-1.998	75.8307				-1.998	146.845
	-1.98999	75.6219				-1.98999	146.361
	-1.98198	75.4132				-1.98198	145.876
	-1.97397	75.2044				-1.97397	145.392
	-1.96597	74.9957				-1.96597	144.908
	-1.95796	74.787				-1.95796	144.424
	-1.94995	74.5782				-1.94995	143.94
	-1.94194	74.3695				-1.94194	143.455
	-1.93393	74.1608				-1.93393	142.971
	-1.92593	73.952				-1.92593	142.487
	-1.91792	73.7433				-1.91792	142.003
	-1.90991	73.5346				-1.90991	141.518
	-1.9019	73.3258				-1.9019	141.034
	-1.89389	73.1171				-1.89389	140.55
	-1.88589	72.9084				-1.88589	140.066
	-1.87788	72.6996				-1.87788	139.582
	-1.86987	72.4909				-1.86987	139.097
	-1.86186	72.2822				-1.86186	138.613
	-1.85385	72.0734				-1.85385	138.129
	-1.84585	71.8647				-1.84585	137.645
	-1.83784	71.656				-1.83784	137.161
	-1.82983	71.4472				-1.82983	136.676
	-1.82182	71.2385				-1.82182	136.192
	-1.81381	71.0298				-1.81381	135.708
	-1.80581	70.821				-1.80581	135.224
	-1.7978	70.6123				-1.7978	134.739
	-1.78979	70.4036				-1.78979	134.255
	-1.78178	70.1948				-1.78178	133.771
	-1.77377	69.9861				-1.77377	133.287
	-1.76577	69.7774				-1.76577	132.803
	-1.75776	69.5686				-1.75776	132.318
	-1.74975	69.3599				-1.74975	131.834
	-1.74174	69.1512				-1.74174	131.35
	-1.73373	68.9424				-1.73373	130.866
	-1.72573	68.7337				-1.72573	130.382
	-1.71772	68.525				-1.71772	129.897
	-1.70971	68.3162				-1.70971	129.413
	-1.7017	68.1075				-1.7017	128.929
	-1.69369	67.8988				-1.69369	128.445
	-1.68569	67.69				-1.68569	127.96
	-1.67768	67.4813				-1.67768	127.476
	-1.66967	67.2725				-1.66967	126.992
	-1.66166	67.0638				-1.66166	126.508
	-1.65365	66.8551				-1.65365	126.024
	-1.64565	66.6463				-1.64565	125.539
	-1.63764	66.4376				-1.63764	125.055
	-1.62963	66.2289				-1.62963	124.571
	-1.62162	66.0201				-1.62162	124.087
	-1.61361	65.8114				-1.61361	123.603
	-1.60561	65.6027				-1.60561	123.118
	-1.5976	65.3939				-1.5976	122.634
	-1.58959	65.1852				-1.58959	122.15
	-1.58158	64.9765				-1.58158	121.666
	-1.57357	64.7677				-1.57357	121.181
	-1.56557	64.559				-1.56557	120.697
	-1.55756	64.3503				-1.55756	120.213
	-1.54955	64.1415				-1.54955	119.729
	-1.54154	63.9328				-1.54154	119.245
	-1.53353	63.7241				-1.53353	118.76
	-1.52553	63.5153				-1.52553	118.276
	-1.51752	63.3066				-1.51752	117.792
	-1.50951	63.0979				-1.50951	117.308
	-1.5015	62.8891				-1.5015	116.823
	-1.49349	62.6804				-1.49349	116.339
	-1.48549	62.4717				-1.48549	115.855
	-1.47748	62.2629				-1.47748	115.371
	-1.46947	62.0542				-1.46947	114.887
	-1.46146	61.8454				-1.46146	114.402
	-1.45345	61.6367				-1.45345	113.918
	-1.44545	61.428				-1.44545	113.434
	-1.43744	61.2192				-1.43744	112.95
	-1.42943	61.0105				-1.42943	112.466
	-1.42142	60.8018				-1.42142	111.981
	-1.41341	60.593				-1.41341	111.497
	-1.40541	60.3843				-1.40541	111.013
	-1.3974	60.1756				-1.3974	110.529
	-1.38939	59.9668				-1.38939	110.044
	-1.38138	59.7581				-1.38138	109.56
	-1.37337	59.5494				-1.37337	109.076
	-1.36537	59.3406				-1.36537	108.592
	-1.35736	59.1319				-1.35736	108.108
	-1.34935	58.9232				-1.34935	107.623
	-1.34134	58.7144				-1.34134	107.139
	-1.33333	58.5057				-1.33333	106.655
	-1.32533	58.297				-1.32533	106.171
	-1.31732	58.0882				-1.31732	105.687
	-1.30931	57.8795				-1.30931	105.202
	-1.3013	57.6708				-1.3013	104.718
	-1.29329	57.462				-1.29329	104.234
	-1.28529	57.2533				-1.28529	103.75
	-1.27728	57.0446				-1.27728	103.265
	-1.26927	56.8358				-1.26927	102.781
	-1.26126	56.6271				-1.26126	102.297
	-1.25325	56.4184				-1.25325	101.813
	-1.24525	56.2096				-1.24525	101.329
	-1.23724	56.0009				-1.23724	100.844
	-1.22923	55.7922				-1.22923	100.36
	-1.22122	55.5834				-1.22122	99.8759
	-1.21321	55.3747				-1.21321	99.3917
	-1.20521	55.166				-1.20521	98.9075
	-1.1972	54.9572				-1.1972	98.4233
	-1.18919	54.7485				-1.18919	97.9391
	-1.18118	54.5397				-1.18118	97.4549
	-1.17317	54.331				-1.17317	96.9707
	-1.16517	54.1223				-1.16517	96.4864
	-1.15716	53.9135				-1.15716	96.0022
	-1.14915	53.7048				-1.14915	95.518
	-1.14114	53.4961				-1.14114	95.0338
	-1.13313	53.2873				-1.13313	94.5496
	-1.12513	53.0786				-1.12513	94.0653
	-1.11712	52.8699				-1.11712	93.5811
	-1.10911	52.6611				-1.10911	93.0969
	-1.1011	52.4524				-1.1011	92.6127
	-1.09309	52.2437				-1.09309	92.1285
	-1.08509	52.0349				-1.08509	91.6443
	-1.07708	51.8262				-1.07708	91.1601
	-1.06907	51.6175				-1.06907	90.6758
	-1.06106	51.4087				-1.06106	90.1916
	-1.05305	51.2				-1.05305	89.7074
	-1.04505	50.9913				-1.04505	89.2232
	-1.03704	50.7825				-1.03704	88.739
	-1.02903	50.5738				-1.02903	88.2548
	-1.02102	50.3651				-1.02102	87.7706
	-1.01301	50.1563				-1.01301	87.2863
	-1.005	49.9476				-1.005	86.8021
	-0.996997	49.7389				-0.996997	86.3179
	-0.988989	49.5301				-0.988989	85.8337
	-0.980981	49.3214				-0.980981	85.3495
	-0.972973	49.1127				-0.972973	84.8653
	-0.964965	48.9039				-0.964965	84.381
	-0.956957	48.6952				-0.956957	83.8968
	-0.948949	48.4864				-0.948949	83.4126
	-0.940941	48.2777				-0.940941	82.9284
	-0.932933	48.069				-0.932933	82.4442
	-0.924925	47.8602				-0.924925	81.96
	-0.916917	47.6515				-0.916917	81.4758
	-0.908909	47.4428				-0.908909	80.9915
	-0.900901	47.234				-0.900901	80.5073
	-0.892893	47.0253				-0.892893	80.0231
	-0.884885	46.8166				-0.884885	79.5389
	-0.876877	46.6078				-0.876877	79.0547
	-0.868869	46.3991				-0.868869	78.5705
	-0.860861	46.1904				-0.860861	78.0862
	-0.852853	45.9816				-0.852853	77.602
	-0.844845	45.7729				-0.844845	77.1178
	-0.836837	45.5642				-0.836837	76.6336
	-0.828829	45.3554				-0.828829	76.1494
	-0.820821	45.1467				-0.820821	75.6652
	-0.812813	44.938				-0.812813	75.181
	-0.804805	44.7292				-0.804805	74.6967
	-0.796797	44.5205				-0.796797	74.2125
	-0.788789	44.3118				-0.788789	73.7283
	-0.780781	44.103				-0.780781	73.2441
	-0.772773	43.8943				-0.772773	72.7599
	-0.764765	43.6856				-0.764765	72.2757
	-0.756757	43.4768				-0.756757	71.7914
	-0.748749	43.2681				-0.748749	71.3072
	-0.740741	43.0594				-0.740741	70.823
	-0.732733	42.8506				-0.732733	70.3388
	-0.724725	42.6419				-0.724725	69.8546
	-0.716717	42.4331				-0.716717	69.3704
	-0.708709	42.2244				-0.708709	68.8862
	-0.700701	42.0157				-0.700701	68.4019
	-0.692693	41.807				-0.692693	67.9177
	-0.684685	41.5982				-0.684685	67.4335
	-0.676677	41.3895				-0.676677	66.9493
	-0.668669	41.1807				-0.668669	66.4651
	-0.660661	40.972				-0.660661	65.9809
	-0.652653	40.7633				-0.652653	65.4966
	-0.644645	40.5545				-0.644645	65.0124
	-0.636637	40.3458				-0.636637	64.5282
	-0.628629	40.1371				-0.628629	64.044
	-0.620621	39.9283				-0.620621	63.5598
	-0.612613	39.7196				-0.612613	63.0756
	-0.604605	39.5109				-0.604605	62.5913
	-0.596597	39.3021				-0.596597	62.1071
	-0.588589	39.0934				-0.588589	61.6229
	-0.580581	38.8847				-0.580581	61.1387
	-0.572573	38.6759				-0.572573	60.6545
	-0.564565	38.4672				-0.564565	60.1703
	-0.556557	38.2585				-0.556557	59.6861
	-0.548548	38.0497				-0.548548	59.2018
	-0.54054	37.841				-0.54054	58.7176
	-0.532532	37.6323				-0.532532	58.2334
	-0.524524	37.4235				-0.524524	57.7492
	-0.516517	37.2148				-0.516517	57.265
	-0.508509	37.0061				-0.508509	56.7808
	-0.500501	36.7973				-0.500501	56.2965
	-0.492492	36.5886				-0.492492	55.8123
	-0.484484	36.3799				-0.484484	55.3281
	-0.476477	36.1711				-0.476477	54.8439
	-0.468468	35.9624				-0.468468	54.3597
	-0.46046	35.7537				-0.46046	53.8755
	-0.452452	35.5449				-0.452452	53.3913
	-0.444444	35.3362				-0.444444	52.907
	-0.436436	35.1275				-0.436436	52.4228
	-0.428428	34.9187				-0.428428	51.9386
	-0.42042	34.71				-0.42042	51.4544
	-0.412412	34.5012				-0.412412	50.9702
	-0.404404	34.2925				-0.404404	50.486
	-0.396396	34.0838				-0.396396	50.0017
	-0.388388	33.875				-0.388388	49.5175
	-0.38038	33.6663				-0.38038	49.0333
	-0.372372	33.4576				-0.372372	48.5491
	-0.364364	33.2488				-0.364364	48.0649
	-0.356356	33.0401				-0.356356	47.5807
	-0.348348	32.8314				-0.348348	47.0964
	-0.34034	32.6226				-0.34034	46.6122
	-0.332332	32.4139				-0.332332	46.128
	-0.324324	32.2052				-0.324324	45.6438
	-0.316316	31.9964				-0.316316	45.1596
	-0.308308	31.7877				-0.308308	44.6754
	-0.3003	31.579				-0.3003	44.1912
	-0.292292	31.3702				-0.292292	43.7069
	-0.284284	31.1615				-0.284284	43.2227
	-0.276276	30.9528				-0.276276	42.7385
	-0.268268	30.744				-0.268268	42.2543
	-0.26026	30.5353				-0.26026	41.7701
	-0.252252	30.3266				-0.252252	41.2859
	-0.244244	30.1178				-0.244244	40.8017
	-0.236236	29.9091				-0.236236	40.3174
	-0.228228	29.7004				-0.228228	39.8332
	-0.22022	29.4916				-0.22022	39.349
	-0.212212	29.2829				-0.212212	38.8648
	-0.204204	29.0742				-0.204204	38.3806
	-0.196196	28.8654				-0.196196	37.8964
	-0.188188	28.6567				-0.188188	37.4121
	-0.18018	28.4479				-0.18018	36.9279
	-0.172172	28.2392				-0.172172	36.4437
	-0.164164	28.0305				-0.164164	35.9595
	-0.156156	27.8217				-0.156156	35.4753
	-0.148148	27.613				-0.148148	34.9911
	-0.14014	27.4043				-0.14014	34.5068
	-0.132132	27.1955				-0.132132	34.0226
	-0.124124	26.9868				-0.124124	33.5384
	-0.116116	26.7781				-0.116116	33.0542
	-0.108108	26.5693				-0.108108	32.57
	-0.1001	26.3606				-0.1001	32.0858
	-0.0920921	26.1519				-0.0920921	31.6016
	-0.0840841	25.9431				-0.0840841	31.1173
	-0.0760761	25.7344				-0.0760761	30.6331
	-0.0680681	25.5257				-0.0680681	30.1489
	-0.0600601	25.3169				-0.0600601	29.6647
	-0.0520521	25.1082				-0.0520521	29.1805
	-0.044044	24.8995				-0.044044	28.6963
	-0.036036	24.6907				-0.036036	28.212
	-0.028028	24.482				-0.028028	27.7278
	-0.02002	24.2733				-0.02002	27.2436
	-0.012012	24.0645				-0.012012	26.7594
	-0.004004	23.8558				-0.004004	26.2752
	0.004004	23.6471				0.004004	25.791
	0.012012	23.4383				0.012012	25.3068
	0.02002	23.2296				0.02002	24.8225
	0.028028	23.0209				0.028028	24.3383
	0.036036	22.8121				0.036036	23.8541
	0.044044	22.6034				0.044044	23.3699
	0.0520521	22.3947				0.0520521	22.8857
	0.0600601	22.1859				0.0600601	22.4015
	0.0680681	21.9772				0.0680681	21.9172
	0.0760761	21.7684				0.0760761	21.433
	0.0840841	21.5597				0.0840841	20.9488
	0.0920921	21.351				0.0920921	20.4646
	0.1001	21.1422				0.1001	19.9804
	0.108108	20.9335				0.108108	19.4962
	0.116116	20.7248				0.116116	19.012
	0.124124	20.516				0.124124	18.5277
	0.132132	20.3073				0.132132	18.0435
	0.14014	20.0986				0.14014	17.5593
	0.148148	19.8898				0.148148	17.0751
	0.156156	19.6811				0.156156	16.5909
	0.164164	19.4724				0.164164	16.1067
	0.172172	19.2636				0.172172	15.6224
	0.18018	19.0549				0.18018	15.1382
	0.188188	18.8462				0.188188	14.654
	0.196196	18.6374				0.196196	14.1698
	0.204204	18.4287				0.204204	13.6856
	0.212212	18.22				0.212212	13.2014
	0.22022	18.0112				0.22022	12.7172
	0.228228	17.8025				0.228228	12.2329
	0.236236	17.5938				0.236236	11.7487
	0.244244	17.385				0.244244	11.2645
	0.252252	17.1763				0.252252	10.7803
	0.26026	16.9676				0.26026	10.2961
	0.268268	16.7588				0.268268	9.81186
	0.276276	16.5501				0.276276	9.32764
	0.284284	16.3414				0.284284	8.84343
	0.292292	16.1326				0.292292	8.35921
	0.3003	15.9239				0.3003	7.875
	0.308308	15.7152				0.308308	7.39078
	0.316316	15.5064				0.316316	6.90657
	0.324324	15.2977				0.324324	6.42235
	0.332332	15.0889				0.332332	5.93813
	0.34034	14.8802				0.34034	5.45392
	0.348348	14.6715				0.348348	4.9697
	0.356356	14.4627				0.356356	4.48549
	0.364364	14.254				0.364364	4.00127
	0.372372	14.0453				0.372372	3.51706
	0.38038	13.8365				0.38038	3.03284
	0.388388	13.6278				0.388388	2.54863
	0.396396	13.4191				0.396396	2.06441
	0.404404	13.2103				0.404404	1.5802
	0.412412	13.0016				0.412412	1.09598
	0.42042	12.7929				0.42042	0.611765
	0.428428	12.5841				0.428428	0.127549
	0.436436	12.3754				0.436436	-0.356666
	0.444444	12.1667				0.444444	-0.840882
	0.452452	11.9579				0.452452	-1.3251
	0.46046	11.7492				0.46046	-1.80931
	0.468468	11.5405				0.468468	-2.29353
	0.476477	11.3317				0.476477	-2.77774
	0.484484	11.123				0.484484	-3.26196
	0.492492	10.9143				0.492492	-3.74617
	0.500501	10.7055				0.500501	-4.23039
	0.508509	10.4968				0.508509	-4.71461
	0.516517	10.2881				0.516517	-5.19882
	0.524524	10.0793				0.524524	-5.68304
	0.532532	9.87059				0.532532	-6.16725
	0.54054	9.66185				0.54054	-6.65147
	0.548548	9.45312				0.548548	-7.13568
	0.556557	9.24439				0.556557	-7.6199
	0.564565	9.03565				0.564565	-8.10412
	0.572573	8.82692				0.572573	-8.58833
	0.580581	8.61818				0.580581	-9.07254
	0.588589	8.40945				0.588589	-9.55676
	0.596597	8.20071				0.596597	-10.041
	0.604605	7.99198				0.604605	-10.5252
	0.612613	7.78324				0.612613	-11.0094
	0.620621	7.57451				0.620621	-11.4936
	0.628629	7.36578				0.628629	-11.9778
	0.636637	7.15704				0.636637	-12.4621
	0.644645	6.94831				0.644645	-12.9463
	0.652653	6.73957				0.652653	-13.4305
	0.660661	6.53084				0.660661	-13.9147
	0.668669	6.3221				0.668669	-14.3989
	0.676677	6.11337				0.676677	-14.8831
	0.684685	5.90464				0.684685	-15.3673
	0.692693	5.6959				0.692693	-15.8516
	0.700701	5.48717				0.700701	-16.3358
	0.708709	5.27843				0.708709	-16.82
	0.716717	5.0697				0.716717	-17.3042
	0.724725	4.86096				0.724725	-17.7884
	0.732733	4.65223				0.732733	-18.2726
	0.740741	4.4435				0.740741	-18.7569
	0.748749	4.23476				0.748749	-19.2411
	0.756757	4.02603				0.756757	-19.7253
	0.764765	3.81729				0.764765	-20.2095
	0.772773	3.60856				0.772773	-20.6937
	0.780781	3.39982				0.780781	-21.1779
	0.788789	3.19109				0.788789	-21.6621
	0.796797	2.98235				0.796797	-22.1464
	0.804805	2.77362				0.804805	-22.6306
	0.812813	2.56489				0.812813	-23.1148
	0.820821	2.35615				0.820821	-23.599
	0.828829	2.14742				0.828829	-24.0832
	0.836837	1.93868				0.836837	-24.5674
	0.844845	1.72995				0.844845	-25.0517
	0.852853	1.52121				0.852853	-25.5359
	0.860861	1.31248				0.860861	-26.0201
	0.868869	1.10374				0.868869	-26.5043
	0.876877	0.895011				0.876877	-26.9885
	0.884885	0.686276				0.884885	-27.4727
	0.892893	0.477542				0.892893	-27.9569
	0.900901	0.268807				0.900901	-28.4412
	0.908909	0.060073				0.908909	-28.9254
	0.916917	-0.148661				0.916917	-29.4096
	0.924925	-0.357396				0.924925	-29.8938
	0.932933	-0.56613				0.932933	-30.378
	0.940941	-0.774865				0.940941	-30.8622
	0.948949	-0.983599				0.948949	-31.3465
	0.956957	-1.19233				0.956957	-31.8307
	0.964965	-1.40107				0.964965	-32.3149
	0.972973	-1.6098				0.972973	-32.7991
	0.980981	-1.81854				0.980981	-33.2833
	0.988989	-2.02727				0.988989	-33.7675
	0.996997	-2.23601				0.996997	-34.2518
	1.005	-2.44474				1.005	-34.736
	1.01301	-2.65347				1.01301	-35.2202
	1.02102	-2.86221				1.02102	-35.7044
	1.02903	-3.07094				1.02903	-36.1886
	1.03704	-3.27968				1.03704	-36.6728
	1.04505	-3.48841				1.04505	-37.157
	1.05305	-3.69715				1.05305	-37.6413
	1.06106	-3.90588				1.06106	-38.1255
	1.06907	-4.11461				1.06907	-38.6097
	1.07708	-4.32335				1.07708	-39.0939
	1.08509	-4.53208				1.08509	-39.5781
	1.09309	-4.74082				1.09309	-40.0623
	1.1011	-4.94955				1.1011	-40.5466
	1.10911	-5.15829				1.10911	-41.0308
	1.11712	-5.36702				1.11712	-41.515
	1.12513	-5.57576				1.12513	-41.9992
	1.13313	-5.78449				1.13313	-42.4834
	1.14114	-5.99322				1.14114	-42.9676
	1.14915	-6.20196				1.14915	-43.4518
	1.15716	-6.41069				1.15716	-43.9361
	1.16517	-6.61943				1.16517	-44.4203
	1.17317	-6.82816				1.17317	-44.9045
	1.18118	-7.0369				1.18118	-45.3887
	1.18919	-7.24563				1.18919	-45.8729
	1.1972	-7.45437				1.1972	-46.3571
	1.20521	-7.6631				1.20521	-46.8414
	1.21321	-7.87183				1.21321	-47.3256
	1.22122	-8.08057				1.22122	-47.8098
	1.22923	-8.2893				1.22923	-48.294
	1.23724	-8.49804				1.23724	-48.7782
	1.24525	-8.70677				1.24525	-49.2624
	1.25325	-8.9155				1.25325	-49.7466
	1.26126	-9.12424				1.26126	-50.2309
	1.26927	-9.33297				1.26927	-50.7151
	1.27728	-9.54171				1.27728	-51.1993
	1.28529	-9.75044				1.28529	-51.6835
	1.29329	-9.95918				1.29329	-52.1677
	1.3013	-10.1679				1.3013	-52.6519
	1.30931	-10.3766				1.30931	-53.1362
	1.31732	-10.5854				1.31732	-53.6204
	1.32533	-10.7941				1.32533	-54.1046
	1.33333	-11.0029				1.33333	-54.5888
	1.34134	-11.2116				1.34134	-55.073
	1.34935	-11.4203				1.34935	-55.5572
	1.35736	-11.6291				1.35736	-56.0414
	1.36537	-11.8378				1.36537	-56.5257
	1.37337	-12.0465				1.37337	-57.0099
	1.38138	-12.2553				1.38138	-57.4941
	1.38939	-12.464				1.38939	-57.9783
	1.3974	-12.6727				1.3974	-58.4625
	1.40541	-12.8815				1.40541	-58.9467
	1.41341	-13.0902				1.41341	-59.431
	1.42142	-13.2989				1.42142	-59.9152
	1.42943	-13.5077				1.42943	-60.3994
	1.43744	-13.7164				1.43744	-60.8836
	1.44545	-13.9251				1.44545	-61.3678
	1.45345	-14.1339				1.45345	-61.852
	1.46146	-14.3426				1.46146	-62.3362
	1.46947	-14.5513				1.46947	-62.8205
	1.47748	-14.7601				1.47748	-63.3047
	1.48549	-14.9688				1.48549	-63.7889
	1.49349	-15.1775				1.49349	-64.2731
	1.5015	-15.3863				1.5015	-64.7573
	1.50951	-15.595				1.50951	-65.2415
	1.51752	-15.8037				1.51752	-65.7258
	1.52553	-16.0125				1.52553	-66.21
	1.53353	-16.2212				1.53353	-66.6942
	1.54154	-16.4299				1.54154	-67.1784
	1.54955	-16.6387				1.54955	-67.6626
	1.55756	-16.8474				1.55756	-68.1468
	1.56557	-17.0561				1.56557	-68.6311
	1.57357	-17.2649				1.57357	-69.1153
	1.58158	-17.4736				1.58158	-69.5995
	1.58959	-17.6823				1.58959	-70.0837
	1.5976	-17.8911				1.5976	-70.5679
	1.60561	-18.0998				1.60561	-71.0521
	1.61361	-18.3086				1.61361	-71.5363
	1.62162	-18.5173				1.62162	-72.0206
	1.62963	-18.726				1.62963	-72.5048
	1.63764	-18.9348				1.63764	-72.989
	1.64565	-19.1435				1.64565	-73.4732
	1.65365	-19.3522				1.65365	-73.9574
	1.66166	-19.561				1.66166	-74.4416
	1.66967	-19.7697				1.66967	-74.9258
	1.67768	-19.9784				1.67768	-75.4101
	1.68569	-20.1872				1.68569	-75.8943
	1.69369	-20.3959				1.69369	-76.3785
	1.7017	-20.6046				1.7017	-76.8627
	1.70971	-20.8134				1.70971	-77.3469
	1.71772	-21.0221				1.71772	-77.8311
	1.72573	-21.2308				1.72573	-78.3154
	1.73373	-21.4396				1.73373	-78.7996
	1.74174	-21.6483				1.74174	-79.2838
	1.74975	-21.857				1.74975	-79.768
	1.75776	-22.0658				1.75776	-80.2522
	1.76577	-22.2745				1.76577	-80.7364
	1.77377	-22.4832				1.77377	-81.2207
	1.78178	-22.692				1.78178	-81.7049
	1.78979	-22.9007				1.78979	-82.1891
	1.7978	-23.1094				1.7978	-82.6733
	1.80581	-23.3182				1.80581	-83.1575
	1.81381	-23.5269				1.81381	-83.6417
	1.82182	-23.7356				1.82182	-84.1259
	1.82983	-23.9444				1.82983	-84.6102
	1.83784	-24.1531				1.83784	-85.0944
	1.84585	-24.3619				1.84585	-85.5786
	1.85385	-24.5706				1.85385	-86.0628
	1.86186	-24.7793				1.86186	-86.547
	1.86987	-24.9881				1.86987	-87.0312
	1.87788	-25.1968				1.87788	-87.5155
	1.88589	-25.4055				1.88589	-87.9997
	1.89389	-25.6143				1.89389	-88.4839
	1.9019	-25.823				1.9019	-88.9681
	1.90991	-26.0317				1.90991	-89.4523
	1.91792	-26.2405				1.91792	-89.9365
	1.92593	-26.4492				1.92593	-90.4207
	1.93393	-26.6579				1.93393	-90.905
	1.94194	-26.8667				1.94194	-91.3892
	1.94995	-27.0754				1.94995	-91.8734
	1.95796	-27.2841				1.95796	-92.3576
	1.96597	-27.4929				1.96597	-92.8418
	1.97397	-27.7016				1.97397	-93.326
	1.98198	-27.9103				1.98198	-93.8103
	1.98999	-28.1191				1.98999	-94.2945
	1.998	-28.3278				1.998	-94.7787
	2.00601	-28.5365				2.00601	-95.2629
	2.01401	-28.7453				2.01401	-95.7471
	2.02202	-28.954				2.02202	-96.2313
	2.03003	-29.1627				2.03003	-96.7155
	2.03804	-29.3715				2.03804	-97.1998
	2.04605	-29.5802				2.04605	-97.684
	2.05405	-29.7889				2.05405	-98.1682
	2.06206	-29.9977				2.06206	-98.6524
	2.07007	-30.2064				2.07007	-99.1366
	2.07808	-30.4151				2.07808	-99.6208
	2.08609	-30.6239				2.08609	-100.105
	2.09409	-30.8326				2.09409	-100.589
	2.1021	-31.0414				2.1021	-101.073
	2.11011	-31.2501				2.11011	-101.558
	2.11812	-31.4588				2.11812	-102.042
	2.12613	-31.6676				2.12613	-102.526
	2.13413	-31.8763				2.13413	-103.01
	2.14214	-32.085				2.14214	-103.495
	2.15015	-32.2938				2.15015	-103.979
	2.15816	-32.5025				2.15816	-104.463
	2.16617	-32.7112				2.16617	-104.947
	2.17417	-32.92				2.17417	-105.431
	2.18218	-33.1287				2.18218	-105.916
	2.19019	-33.3374				2.19019	-106.4
	2.1982	-33.5462				2.1982	-106.884
	2.20621	-33.7549				2.20621	-107.368
	2.21421	-33.9636				2.21421	-107.853
	2.22222	-34.1724				2.22222	-108.337
	2.23023	-34.3811				2.23023	-108.821
	2.23824	-34.5898				2.23824	-109.305
	2.24625	-34.7986				2.24625	-109.789
	2.25425	-35.0073				2.25425	-110.274
	2.26226	-35.216				2.26226	-110.758
	2.27027	-35.4248				2.27027	-111.242
	2.27828	-35.6335				2.27828	-111.726
	2.28629	-35.8422				2.28629	-112.21
	2.29429	-36.051				2.29429	-112.695
	2.3023	-36.2597				2.3023	-113.179
	2.31031	-36.4684				2.31031	-113.663
	2.31832	-36.6772				2.31832	-114.147
	2.32633	-36.8859				2.32633	-114.632
	2.33433	-37.0946				2.33433	-115.116
	2.34234	-37.3034				2.34234	-115.6
	2.35035	-37.5121				2.35035	-116.084
	2.35836	-37.7208				2.35836	-116.568
	2.36637	-37.9296				2.36637	-117.053
	2.37437	-38.1383				2.37437	-117.537
	2.38238	-38.3471				2.38238	-118.021
	2.39039	-38.5558				2.39039	-118.505
	2.3984	-38.7645				2.3984	-118.989
	2.40641	-38.9733				2.40641	-119.474
	2.41441	-39.182				2.41441	-119.958
	2.42242	-39.3907				2.42242	-120.442
	2.43043	-39.5995				2.43043	-120.926
	2.43844	-39.8082				2.43844	-121.411
	2.44645	-40.0169				2.44645	-121.895
	2.45445	-40.2257				2.45445	-122.379
	2.46246	-40.4344				2.46246	-122.863
	2.47047	-40.6431				2.47047	-123.347
	2.47848	-40.8519				2.47848	-123.832
	2.48649	-41.0606				2.48649	-124.316
	2.49449	-41.2693				2.49449	-124.8
	2.5025	-41.4781				2.5025	-125.284
	2.51051	-41.6868				2.51051	-125.768
	2.51852	-41.8955				2.51852	-126.253
	2.52653	-42.1043				2.52653	-126.737
	2.53453	-42.313				2.53453	-127.221
	2.54254	-42.5217				2.54254	-127.705
	2.55055	-42.7305				2.55055	-128.19
	2.55856	-42.9392				2.55856	-128.674
	2.56657	-43.1479				2.56657	-129.158
	2.57457	-43.3567				2.57457	-129.642
	2.58258	-43.5654				2.58258	-130.126
	2.59059	-43.7741				2.59059	-130.611
	2.5986	-43.9829				2.5986	-131.095
	2.60661	-44.1916				2.60661	-131.579
	2.61461	-44.4004				2.61461	-132.063
	2.62262	-44.6091				2.62262	-132.548
	2.63063	-44.8178				2.63063	-133.032
	2.63864	-45.0266				2.63864	-133.516
	2.64665	-45.2353				2.64665	-134
	2.65465	-45.444				2.65465	-134.484
	2.66266	-45.6528				2.66266	-134.969
	2.67067	-45.8615				2.67067	-135.453
	2.67868	-46.0702				2.67868	-135.937
	2.68669	-46.279				2.68669	-136.421
	2.69469	-46.4877				2.69469	-136.905
	2.7027	-46.6964				2.7027	-137.39
	2.71071	-46.9052				2.71071	-137.874
	2.71872	-47.1139				2.71872	-138.358
	2.72673	-47.3226				2.72673	-138.842
	2.73473	-47.5314				2.73473	-139.327
	2.74274	-47.7401				2.74274	-139.811
	2.75075	-47.9488				2.75075	-140.295
	2.75876	-48.1576				2.75876	-140.779
	2.76677	-48.3663				2.76677	-141.263
	2.77477	-48.575				2.77477	-141.748
	2.78278	-48.7838				2.78278	-142.232
	2.79079	-48.9925				2.79079	-142.716
	2.7988	-49.2012				2.7988	-143.2
	2.80681	-49.41				2.80681	-143.684
	2.81481	-49.6187				2.81481	-144.169
	2.82282	-49.8274				2.82282	-144.653
	2.83083	-50.0362				2.83083	-145.137
	2.83884	-50.2449				2.83884	-145.621
	2.84685	-50.4536				2.84685	-146.106
	2.85485	-50.6624				2.85485	-146.59
	2.86286	-50.8711				2.86286	-147.074
	2.87087	-51.0799				2.87087	-147.558
	2.87888	-51.2886				2.87888	-148.042
	2.88689	-51.4973				2.88689	-148.527
	2.89489	-51.7061				2.89489	-149.011
	2.9029	-51.9148				2.9029	-149.495
	2.91091	-52.1235				2.91091	-149.979
	2.91892	-52.3323				2.91892	-150.463
	2.92693	-52.541				2.92693	-150.948
	2.93493	-52.7497				2.93493	-151.432
	2.94294	-52.9585				2.94294	-151.916
	2.95095	-53.1672				2.95095	-152.4
	2.95896	-53.3759				2.95896	-152.885
	2.96697	-53.5847				2.96697	-153.369
	2.97497	-53.7934				2.97497	-153.853
	2.98298	-54.0021				2.98298	-154.337
	2.99099	-54.2109				2.99099	-154.821
	2.999	-54.4196				2.999	-155.306
	3.00701	-54.6283				3.00701	-155.79
	3.01502	-54.8371				3.01502	-156.274
	3.02302	-55.0458				3.02302	-156.758
	3.03103	-55.2545				3.03103	-157.243
	3.03904	-55.4633				3.03904	-157.727
	3.04705	-55.672				3.04705	-158.211
	3.05506	-55.8807				3.05506	-158.695
	3.06306	-56.0895				3.06306	-159.179
	3.07107	-56.2982				3.07107	-159.664
	3.07908	-56.5069				3.07908	-160.148
	3.08709	-56.7157				3.08709	-160.632
	3.0951	-56.9244				3.0951	-161.116
	3.1031	-57.1332				3.1031	-161.6
	3.11111	-57.3419				3.11111	-162.085
	3.11912	-57.5506				3.11912	-162.569
	3.12713	-57.7593				3.12713	-163.053
	3.13514	-57.9681				3.13514	-163.537
	3.14314	-58.1768				3.14314	-164.022
	3.15115	-58.3856				3.15115	-164.506
	3.15916	-58.5943				3.15916	-164.99
	3.16717	-58.803				3.16717	-165.474
	3.17518	-59.0118				3.17518	-165.958
	3.18318	-59.2205				3.18318	-166.443
	3.19119	-59.4292				3.19119	-166.927
	3.1992	-59.638				3.1992	-167.411
	3.20721	-59.8467				3.20721	-167.895
	3.21522	-60.0554				3.21522	-168.379
	3.22322	-60.2642				3.22322	-168.864
	3.23123	-60.4729				3.23123	-169.348
	3.23924	-60.6816				3.23924	-169.832
	3.24725	-60.8904				3.24725	-170.316
	3.25526	-61.0991				3.25526	-170.801
	3.26326	-61.3078				3.26326	-171.285
	3.27127	-61.5166				3.27127	-171.769
	3.27928	-61.7253				3.27928	-172.253
	3.28729	-61.934				3.28729	-172.737
	3.2953	-62.1428				3.2953	-173.222
	3.3033	-62.3515				3.3033	-173.706
	3.31131	-62.5602				3.31131	-174.19
	3.31932	-62.769				3.31932	-174.674
	3.32733	-62.9777				3.32733	-175.158
	3.33534	-63.1864				3.33534	-175.643
	3.34334	-63.3952				3.34334	-176.127
	3.35135	-63.6039				3.35135	-176.611
	3.35936	-63.8126				3.35936	-177.095
	3.36737	-64.0214				3.36737	-177.58
	3.37538	-64.2301				3.37538	-178.064
	3.38338	-64.4389				3.38338	-178.548
	3.39139	-64.6476				3.39139	-179.032
	3.3994	-64.8563				3.3994	-179.516
	3.40741	-65.0651				3.40741	-180.001
	3.41542	-65.2738				3.41542	-180.485
	3.42342	-65.4825				3.42342	-180.969
	3.43143	-65.6913				3.43143	-181.453
	3.43944	-65.9				3.43944	-181.937
	3.44745	-66.1087				3.44745	-182.422
	3.45546	-66.3175				3.45546	-182.906
	3.46346	-66.5262				3.46346	-183.39
	3.47147	-66.7349				3.47147	-183.874
	3.47948	-66.9437				3.47948	-184.359
	3.48749	-67.1524				3.48749	-184.843
	3.4955	-67.3611				3.4955	-185.327
	3.5035	-67.5699				3.5035	-185.811
	3.51151	-67.7786				3.51151	-186.295
	3.51952	-67.9873				3.51952	-186.78
	3.52753	-68.1961				3.52753	-187.264
	3.53554	-68.4048				3.53554	-187.748
	3.54354	-68.6135				3.54354	-188.232
	3.55155	-68.8223				3.55155	-188.716
	3.55956	-69.031				3.55956	-189.201
	3.56757	-69.2397				3.56757	-189.685
	3.57558	-69.4485				3.57558	-190.169
	3.58358	-69.6572				3.58358	-190.653
	3.59159	-69.8659				3.59159	-191.138
	3.5996	-70.0747				3.5996	-191.622
	3.60761	-70.2834				3.60761	-192.106
	3.61562	-70.4921				3.61562	-192.59
	3.62362	-70.7009				3.62362	-193.074
	3.63163	-70.9096				3.63163	-193.559
	3.63964	-71.1184				3.63964	-194.043
	3.64765	-71.3271				3.64765	-194.527
	3.65566	-71.5358				3.65566	-195.011
	3.66366	-71.7446				3.66366	-195.496
	3.67167	-71.9533				3.67167	-195.98
	3.67968	-72.162				3.67968	-196.464
	3.68769	-72.3708				3.68769	-196.948
	3.6957	-72.5795				3.6957	-197.432
	3.7037	-72.7882				3.7037	-197.917
	3.71171	-72.997				3.71171	-198.401
	3.71972	-73.2057				3.71972	-198.885
	3.72773	-73.4144				3.72773	-199.369
	3.73574	-73.6232				3.73574	-199.853
	3.74374	-73.8319				3.74374	-200.338
	3.75175	-74.0406				3.75175	-200.822
	3.75976	-74.2494				3.75976	-201.306
	3.76777	-74.4581				3.76777	-201.79
	3.77578	-74.6668				3.77578	-202.275
	3.78378	-74.8756				3.78378	-202.759
	3.79179	-75.0843				3.79179	-203.243
	3.7998	-75.293				3.7998	-203.727
	3.80781	-75.5018				3.80781	-204.211
	3.81582	-75.7105				3.81582	-204.696
	3.82382	-75.9192				3.82382	-205.18
	3.83183	-76.128				3.83183	-205.664
	3.83984	-76.3367				3.83984	-206.148
	3.84785	-76.5455				3.84785	-206.632
	3.85586	-76.7542				3.85586	-207.117
	3.86386	-76.9629				3.86386	-207.601
	3.87187	-77.1716				3.87187	-208.085
	3.87988	-77.3804				3.87988	-208.569
	3.88789	-77.5891				3.88789	-209.054
	3.8959	-77.7978				3.8959	-209.538
	3.9039	-78.0066				3.9039	-210.022
	3.91191	-78.2153				3.91191	-210.506
	3.91992	-78.4241				3.91992	-210.99
	3.92793	-78.6328				3.92793	-211.475
	3.93594	-78.8415				3.93594	-211.959
	3.94394	-79.0503				3.94394	-212.443
	3.95195	-79.259				3.95195	-212.927
	3.95996	-79.4677				3.95996	-213.411
	3.96797	-79.6765				3.96797	-213.896
	3.97598	-79.8852				3.97598	-214.38
	3.98398	-80.0939				3.98398	-214.864
	3.99199	-80.3027				3.99199	-215.348
	4	-80.5114				4	-215.833

## Sheet: Fig.4j
saline	social engagement index	distractor bias (ms)	errorbar		OT	social engagement index	distractor bias (ms)	errorbar
	-1.98	68.7591	20.5308			-1.06	71.346	18.9175
	-0.62	41.8345	13.7347			-0.3	44.8901	13.7787
	1.38	2.39725	19.5785			0.68	10.7475	16.892
	1.22	5.509	15.2734			0.68	10.7017	13.4843
fitted curve	social engagement index	distractor bias (ms)			fitted curve	social engagement index	distractor bias (ms)
	-4	108.637				-4	173.793
	-3.99199	108.479				-3.99199	173.514
	-3.98398	108.321				-3.98398	173.235
	-3.97598	108.163				-3.97598	172.956
	-3.96797	108.005				-3.96797	172.677
	-3.95996	107.846				-3.95996	172.398
	-3.95195	107.688				-3.95195	172.119
	-3.94394	107.53				-3.94394	171.84
	-3.93594	107.372				-3.93594	171.561
	-3.92793	107.214				-3.92793	171.282
	-3.91992	107.055				-3.91992	171.003
	-3.91191	106.897				-3.91191	170.724
	-3.9039	106.739				-3.9039	170.445
	-3.8959	106.581				-3.8959	170.166
	-3.88789	106.423				-3.88789	169.887
	-3.87988	106.265				-3.87988	169.608
	-3.87187	106.106				-3.87187	169.329
	-3.86386	105.948				-3.86386	169.05
	-3.85586	105.79				-3.85586	168.771
	-3.84785	105.632				-3.84785	168.492
	-3.83984	105.474				-3.83984	168.213
	-3.83183	105.315				-3.83183	167.934
	-3.82382	105.157				-3.82382	167.655
	-3.81582	104.999				-3.81582	167.376
	-3.80781	104.841				-3.80781	167.097
	-3.7998	104.683				-3.7998	166.818
	-3.79179	104.525				-3.79179	166.539
	-3.78378	104.366				-3.78378	166.26
	-3.77578	104.208				-3.77578	165.981
	-3.76777	104.05				-3.76777	165.702
	-3.75976	103.892				-3.75976	165.423
	-3.75175	103.734				-3.75175	165.144
	-3.74374	103.575				-3.74374	164.865
	-3.73574	103.417				-3.73574	164.586
	-3.72773	103.259				-3.72773	164.307
	-3.71972	103.101				-3.71972	164.028
	-3.71171	102.943				-3.71171	163.749
	-3.7037	102.785				-3.7037	163.469
	-3.6957	102.626				-3.6957	163.19
	-3.68769	102.468				-3.68769	162.911
	-3.67968	102.31				-3.67968	162.632
	-3.67167	102.152				-3.67167	162.353
	-3.66366	101.994				-3.66366	162.074
	-3.65566	101.835				-3.65566	161.795
	-3.64765	101.677				-3.64765	161.516
	-3.63964	101.519				-3.63964	161.237
	-3.63163	101.361				-3.63163	160.958
	-3.62362	101.203				-3.62362	160.679
	-3.61562	101.044				-3.61562	160.4
	-3.60761	100.886				-3.60761	160.121
	-3.5996	100.728				-3.5996	159.842
	-3.59159	100.57				-3.59159	159.563
	-3.58358	100.412				-3.58358	159.284
	-3.57558	100.254				-3.57558	159.005
	-3.56757	100.095				-3.56757	158.726
	-3.55956	99.9372				-3.55956	158.447
	-3.55155	99.779				-3.55155	158.168
	-3.54354	99.6209				-3.54354	157.889
	-3.53554	99.4627				-3.53554	157.61
	-3.52753	99.3045				-3.52753	157.331
	-3.51952	99.1463				-3.51952	157.052
	-3.51151	98.9881				-3.51151	156.773
	-3.5035	98.8299				-3.5035	156.494
	-3.4955	98.6718				-3.4955	156.215
	-3.48749	98.5136				-3.48749	155.936
	-3.47948	98.3554				-3.47948	155.657
	-3.47147	98.1972				-3.47147	155.378
	-3.46346	98.039				-3.46346	155.099
	-3.45546	97.8808				-3.45546	154.82
	-3.44745	97.7227				-3.44745	154.541
	-3.43944	97.5645				-3.43944	154.262
	-3.43143	97.4063				-3.43143	153.983
	-3.42342	97.2481				-3.42342	153.704
	-3.41542	97.0899				-3.41542	153.425
	-3.40741	96.9317				-3.40741	153.146
	-3.3994	96.7736				-3.3994	152.867
	-3.39139	96.6154				-3.39139	152.588
	-3.38338	96.4572				-3.38338	152.309
	-3.37538	96.299				-3.37538	152.03
	-3.36737	96.1408				-3.36737	151.751
	-3.35936	95.9827				-3.35936	151.471
	-3.35135	95.8245				-3.35135	151.192
	-3.34334	95.6663				-3.34334	150.913
	-3.33534	95.5081				-3.33534	150.634
	-3.32733	95.3499				-3.32733	150.355
	-3.31932	95.1917				-3.31932	150.076
	-3.31131	95.0336				-3.31131	149.797
	-3.3033	94.8754				-3.3033	149.518
	-3.2953	94.7172				-3.2953	149.239
	-3.28729	94.559				-3.28729	148.96
	-3.27928	94.4008				-3.27928	148.681
	-3.27127	94.2426				-3.27127	148.402
	-3.26326	94.0845				-3.26326	148.123
	-3.25526	93.9263				-3.25526	147.844
	-3.24725	93.7681				-3.24725	147.565
	-3.23924	93.6099				-3.23924	147.286
	-3.23123	93.4517				-3.23123	147.007
	-3.22322	93.2935				-3.22322	146.728
	-3.21522	93.1354				-3.21522	146.449
	-3.20721	92.9772				-3.20721	146.17
	-3.1992	92.819				-3.1992	145.891
	-3.19119	92.6608				-3.19119	145.612
	-3.18318	92.5026				-3.18318	145.333
	-3.17518	92.3444				-3.17518	145.054
	-3.16717	92.1863				-3.16717	144.775
	-3.15916	92.0281				-3.15916	144.496
	-3.15115	91.8699				-3.15115	144.217
	-3.14314	91.7117				-3.14314	143.938
	-3.13514	91.5535				-3.13514	143.659
	-3.12713	91.3954				-3.12713	143.38
	-3.11912	91.2372				-3.11912	143.101
	-3.11111	91.079				-3.11111	142.822
	-3.1031	90.9208				-3.1031	142.543
	-3.0951	90.7626				-3.0951	142.264
	-3.08709	90.6044				-3.08709	141.985
	-3.07908	90.4463				-3.07908	141.706
	-3.07107	90.2881				-3.07107	141.427
	-3.06306	90.1299				-3.06306	141.148
	-3.05506	89.9717				-3.05506	140.869
	-3.04705	89.8135				-3.04705	140.59
	-3.03904	89.6553				-3.03904	140.311
	-3.03103	89.4972				-3.03103	140.032
	-3.02302	89.339				-3.02302	139.753
	-3.01502	89.1808				-3.01502	139.474
	-3.00701	89.0226				-3.00701	139.194
	-2.999	88.8644				-2.999	138.915
	-2.99099	88.7062				-2.99099	138.636
	-2.98298	88.5481				-2.98298	138.357
	-2.97497	88.3899				-2.97497	138.078
	-2.96697	88.2317				-2.96697	137.799
	-2.95896	88.0735				-2.95896	137.52
	-2.95095	87.9153				-2.95095	137.241
	-2.94294	87.7571				-2.94294	136.962
	-2.93493	87.599				-2.93493	136.683
	-2.92693	87.4408				-2.92693	136.404
	-2.91892	87.2826				-2.91892	136.125
	-2.91091	87.1244				-2.91091	135.846
	-2.9029	86.9662				-2.9029	135.567
	-2.89489	86.808				-2.89489	135.288
	-2.88689	86.6499				-2.88689	135.009
	-2.87888	86.4917				-2.87888	134.73
	-2.87087	86.3335				-2.87087	134.451
	-2.86286	86.1753				-2.86286	134.172
	-2.85485	86.0171				-2.85485	133.893
	-2.84685	85.859				-2.84685	133.614
	-2.83884	85.7008				-2.83884	133.335
	-2.83083	85.5426				-2.83083	133.056
	-2.82282	85.3844				-2.82282	132.777
	-2.81481	85.2262				-2.81481	132.498
	-2.80681	85.068				-2.80681	132.219
	-2.7988	84.9099				-2.7988	131.94
	-2.79079	84.7517				-2.79079	131.661
	-2.78278	84.5935				-2.78278	131.382
	-2.77477	84.4353				-2.77477	131.103
	-2.76677	84.2771				-2.76677	130.824
	-2.75876	84.1189				-2.75876	130.545
	-2.75075	83.9608				-2.75075	130.266
	-2.74274	83.8026				-2.74274	129.987
	-2.73473	83.6444				-2.73473	129.708
	-2.72673	83.4862				-2.72673	129.429
	-2.71872	83.328				-2.71872	129.15
	-2.71071	83.1698				-2.71071	128.871
	-2.7027	83.0117				-2.7027	128.592
	-2.69469	82.8535				-2.69469	128.313
	-2.68669	82.6953				-2.68669	128.034
	-2.67868	82.5371				-2.67868	127.755
	-2.67067	82.3789				-2.67067	127.476
	-2.66266	82.2207				-2.66266	127.196
	-2.65465	82.0626				-2.65465	126.917
	-2.64665	81.9044				-2.64665	126.638
	-2.63864	81.7462				-2.63864	126.359
	-2.63063	81.588				-2.63063	126.08
	-2.62262	81.4298				-2.62262	125.801
	-2.61461	81.2716				-2.61461	125.522
	-2.60661	81.1135				-2.60661	125.243
	-2.5986	80.9553				-2.5986	124.964
	-2.59059	80.7971				-2.59059	124.685
	-2.58258	80.6389				-2.58258	124.406
	-2.57457	80.4807				-2.57457	124.127
	-2.56657	80.3226				-2.56657	123.848
	-2.55856	80.1644				-2.55856	123.569
	-2.55055	80.0062				-2.55055	123.29
	-2.54254	79.848				-2.54254	123.011
	-2.53453	79.6898				-2.53453	122.732
	-2.52653	79.5316				-2.52653	122.453
	-2.51852	79.3735				-2.51852	122.174
	-2.51051	79.2153				-2.51051	121.895
	-2.5025	79.0571				-2.5025	121.616
	-2.49449	78.8989				-2.49449	121.337
	-2.48649	78.7407				-2.48649	121.058
	-2.47848	78.5825				-2.47848	120.779
	-2.47047	78.4244				-2.47047	120.5
	-2.46246	78.2662				-2.46246	120.221
	-2.45445	78.108				-2.45445	119.942
	-2.44645	77.9498				-2.44645	119.663
	-2.43844	77.7916				-2.43844	119.384
	-2.43043	77.6334				-2.43043	119.105
	-2.42242	77.4753				-2.42242	118.826
	-2.41441	77.3171				-2.41441	118.547
	-2.40641	77.1589				-2.40641	118.268
	-2.3984	77.0007				-2.3984	117.989
	-2.39039	76.8425				-2.39039	117.71
	-2.38238	76.6844				-2.38238	117.431
	-2.37437	76.5262				-2.37437	117.152
	-2.36637	76.368				-2.36637	116.873
	-2.35836	76.2098				-2.35836	116.594
	-2.35035	76.0516				-2.35035	116.315
	-2.34234	75.8934				-2.34234	116.036
	-2.33433	75.7353				-2.33433	115.757
	-2.32633	75.5771				-2.32633	115.478
	-2.31832	75.4189				-2.31832	115.198
	-2.31031	75.2607				-2.31031	114.919
	-2.3023	75.1025				-2.3023	114.64
	-2.29429	74.9443				-2.29429	114.361
	-2.28629	74.7862				-2.28629	114.082
	-2.27828	74.628				-2.27828	113.803
	-2.27027	74.4698				-2.27027	113.524
	-2.26226	74.3116				-2.26226	113.245
	-2.25425	74.1534				-2.25425	112.966
	-2.24625	73.9952				-2.24625	112.687
	-2.23824	73.8371				-2.23824	112.408
	-2.23023	73.6789				-2.23023	112.129
	-2.22222	73.5207				-2.22222	111.85
	-2.21421	73.3625				-2.21421	111.571
	-2.20621	73.2043				-2.20621	111.292
	-2.1982	73.0461				-2.1982	111.013
	-2.19019	72.888				-2.19019	110.734
	-2.18218	72.7298				-2.18218	110.455
	-2.17417	72.5716				-2.17417	110.176
	-2.16617	72.4134				-2.16617	109.897
	-2.15816	72.2552				-2.15816	109.618
	-2.15015	72.097				-2.15015	109.339
	-2.14214	71.9389				-2.14214	109.06
	-2.13413	71.7807				-2.13413	108.781
	-2.12613	71.6225				-2.12613	108.502
	-2.11812	71.4643				-2.11812	108.223
	-2.11011	71.3061				-2.11011	107.944
	-2.1021	71.148				-2.1021	107.665
	-2.09409	70.9898				-2.09409	107.386
	-2.08609	70.8316				-2.08609	107.107
	-2.07808	70.6734				-2.07808	106.828
	-2.07007	70.5152				-2.07007	106.549
	-2.06206	70.357				-2.06206	106.27
	-2.05405	70.1989				-2.05405	105.991
	-2.04605	70.0407				-2.04605	105.712
	-2.03804	69.8825				-2.03804	105.433
	-2.03003	69.7243				-2.03003	105.154
	-2.02202	69.5661				-2.02202	104.875
	-2.01401	69.4079				-2.01401	104.596
	-2.00601	69.2498				-2.00601	104.317
	-1.998	69.0916				-1.998	104.038
	-1.98999	68.9334				-1.98999	103.759
	-1.98198	68.7752				-1.98198	103.48
	-1.97397	68.617				-1.97397	103.201
	-1.96597	68.4588				-1.96597	102.921
	-1.95796	68.3007				-1.95796	102.642
	-1.94995	68.1425				-1.94995	102.363
	-1.94194	67.9843				-1.94194	102.084
	-1.93393	67.8261				-1.93393	101.805
	-1.92593	67.6679				-1.92593	101.526
	-1.91792	67.5097				-1.91792	101.247
	-1.90991	67.3516				-1.90991	100.968
	-1.9019	67.1934				-1.9019	100.689
	-1.89389	67.0352				-1.89389	100.41
	-1.88589	66.877				-1.88589	100.131
	-1.87788	66.7188				-1.87788	99.8522
	-1.86987	66.5606				-1.86987	99.5732
	-1.86186	66.4025				-1.86186	99.2942
	-1.85385	66.2443				-1.85385	99.0152
	-1.84585	66.0861				-1.84585	98.7361
	-1.83784	65.9279				-1.83784	98.4571
	-1.82983	65.7697				-1.82983	98.1781
	-1.82182	65.6116				-1.82182	97.8991
	-1.81381	65.4534				-1.81381	97.6201
	-1.80581	65.2952				-1.80581	97.341
	-1.7978	65.137				-1.7978	97.062
	-1.78979	64.9788				-1.78979	96.783
	-1.78178	64.8207				-1.78178	96.504
	-1.77377	64.6625				-1.77377	96.2249
	-1.76577	64.5043				-1.76577	95.9459
	-1.75776	64.3461				-1.75776	95.6669
	-1.74975	64.1879				-1.74975	95.3879
	-1.74174	64.0297				-1.74174	95.1088
	-1.73373	63.8715				-1.73373	94.8298
	-1.72573	63.7134				-1.72573	94.5508
	-1.71772	63.5552				-1.71772	94.2718
	-1.70971	63.397				-1.70971	93.9928
	-1.7017	63.2388				-1.7017	93.7137
	-1.69369	63.0806				-1.69369	93.4347
	-1.68569	62.9224				-1.68569	93.1557
	-1.67768	62.7643				-1.67768	92.8767
	-1.66967	62.6061				-1.66967	92.5976
	-1.66166	62.4479				-1.66166	92.3186
	-1.65365	62.2897				-1.65365	92.0396
	-1.64565	62.1315				-1.64565	91.7606
	-1.63764	61.9734				-1.63764	91.4815
	-1.62963	61.8152				-1.62963	91.2025
	-1.62162	61.657				-1.62162	90.9235
	-1.61361	61.4988				-1.61361	90.6445
	-1.60561	61.3406				-1.60561	90.3654
	-1.5976	61.1824				-1.5976	90.0864
	-1.58959	61.0243				-1.58959	89.8074
	-1.58158	60.8661				-1.58158	89.5284
	-1.57357	60.7079				-1.57357	89.2494
	-1.56557	60.5497				-1.56557	88.9703
	-1.55756	60.3915				-1.55756	88.6913
	-1.54955	60.2333				-1.54955	88.4123
	-1.54154	60.0752				-1.54154	88.1333
	-1.53353	59.917				-1.53353	87.8542
	-1.52553	59.7588				-1.52553	87.5752
	-1.51752	59.6006				-1.51752	87.2962
	-1.50951	59.4424				-1.50951	87.0172
	-1.5015	59.2843				-1.5015	86.7382
	-1.49349	59.1261				-1.49349	86.4591
	-1.48549	58.9679				-1.48549	86.1801
	-1.47748	58.8097				-1.47748	85.9011
	-1.46947	58.6515				-1.46947	85.6221
	-1.46146	58.4933				-1.46146	85.343
	-1.45345	58.3351				-1.45345	85.064
	-1.44545	58.177				-1.44545	84.785
	-1.43744	58.0188				-1.43744	84.506
	-1.42943	57.8606				-1.42943	84.2269
	-1.42142	57.7024				-1.42142	83.9479
	-1.41341	57.5442				-1.41341	83.6689
	-1.40541	57.3861				-1.40541	83.3899
	-1.3974	57.2279				-1.3974	83.1109
	-1.38939	57.0697				-1.38939	82.8318
	-1.38138	56.9115				-1.38138	82.5528
	-1.37337	56.7533				-1.37337	82.2738
	-1.36537	56.5951				-1.36537	81.9948
	-1.35736	56.437				-1.35736	81.7157
	-1.34935	56.2788				-1.34935	81.4367
	-1.34134	56.1206				-1.34134	81.1577
	-1.33333	55.9624				-1.33333	80.8787
	-1.32533	55.8042				-1.32533	80.5996
	-1.31732	55.646				-1.31732	80.3206
	-1.30931	55.4879				-1.30931	80.0416
	-1.3013	55.3297				-1.3013	79.7626
	-1.29329	55.1715				-1.29329	79.4835
	-1.28529	55.0133				-1.28529	79.2045
	-1.27728	54.8551				-1.27728	78.9255
	-1.26927	54.697				-1.26927	78.6465
	-1.26126	54.5388				-1.26126	78.3675
	-1.25325	54.3806				-1.25325	78.0884
	-1.24525	54.2224				-1.24525	77.8094
	-1.23724	54.0642				-1.23724	77.5304
	-1.22923	53.906				-1.22923	77.2514
	-1.22122	53.7479				-1.22122	76.9723
	-1.21321	53.5897				-1.21321	76.6933
	-1.20521	53.4315				-1.20521	76.4143
	-1.1972	53.2733				-1.1972	76.1353
	-1.18919	53.1151				-1.18919	75.8563
	-1.18118	52.9569				-1.18118	75.5772
	-1.17317	52.7988				-1.17317	75.2982
	-1.16517	52.6406				-1.16517	75.0192
	-1.15716	52.4824				-1.15716	74.7402
	-1.14915	52.3242				-1.14915	74.4611
	-1.14114	52.166				-1.14114	74.1821
	-1.13313	52.0078				-1.13313	73.9031
	-1.12513	51.8497				-1.12513	73.6241
	-1.11712	51.6915				-1.11712	73.3451
	-1.10911	51.5333				-1.10911	73.066
	-1.1011	51.3751				-1.1011	72.787
	-1.09309	51.2169				-1.09309	72.508
	-1.08509	51.0587				-1.08509	72.229
	-1.07708	50.9006				-1.07708	71.9499
	-1.06907	50.7424				-1.06907	71.6709
	-1.06106	50.5842				-1.06106	71.3919
	-1.05305	50.426				-1.05305	71.1129
	-1.04505	50.2678				-1.04505	70.8338
	-1.03704	50.1096				-1.03704	70.5548
	-1.02903	49.9515				-1.02903	70.2758
	-1.02102	49.7933				-1.02102	69.9968
	-1.01301	49.6351				-1.01301	69.7177
	-1.005	49.4769				-1.005	69.4387
	-0.996997	49.3187				-0.996997	69.1597
	-0.988989	49.1606				-0.988989	68.8807
	-0.980981	49.0024				-0.980981	68.6017
	-0.972973	48.8442				-0.972973	68.3226
	-0.964965	48.686				-0.964965	68.0436
	-0.956957	48.5278				-0.956957	67.7646
	-0.948949	48.3696				-0.948949	67.4856
	-0.940941	48.2115				-0.940941	67.2065
	-0.932933	48.0533				-0.932933	66.9275
	-0.924925	47.8951				-0.924925	66.6485
	-0.916917	47.7369				-0.916917	66.3695
	-0.908909	47.5787				-0.908909	66.0905
	-0.900901	47.4205				-0.900901	65.8114
	-0.892893	47.2624				-0.892893	65.5324
	-0.884885	47.1042				-0.884885	65.2534
	-0.876877	46.946				-0.876877	64.9744
	-0.868869	46.7878				-0.868869	64.6953
	-0.860861	46.6296				-0.860861	64.4163
	-0.852853	46.4714				-0.852853	64.1373
	-0.844845	46.3133				-0.844845	63.8583
	-0.836837	46.1551				-0.836837	63.5792
	-0.828829	45.9969				-0.828829	63.3002
	-0.820821	45.8387				-0.820821	63.0212
	-0.812813	45.6805				-0.812813	62.7422
	-0.804805	45.5223				-0.804805	62.4631
	-0.796797	45.3642				-0.796797	62.1841
	-0.788789	45.206				-0.788789	61.9051
	-0.780781	45.0478				-0.780781	61.6261
	-0.772773	44.8896				-0.772773	61.3471
	-0.764765	44.7314				-0.764765	61.068
	-0.756757	44.5733				-0.756757	60.789
	-0.748749	44.4151				-0.748749	60.51
	-0.740741	44.2569				-0.740741	60.231
	-0.732733	44.0987				-0.732733	59.9519
	-0.724725	43.9405				-0.724725	59.6729
	-0.716717	43.7823				-0.716717	59.3939
	-0.708709	43.6242				-0.708709	59.1149
	-0.700701	43.466				-0.700701	58.8359
	-0.692693	43.3078				-0.692693	58.5568
	-0.684685	43.1496				-0.684685	58.2778
	-0.676677	42.9914				-0.676677	57.9988
	-0.668669	42.8332				-0.668669	57.7198
	-0.660661	42.6751				-0.660661	57.4407
	-0.652653	42.5169				-0.652653	57.1617
	-0.644645	42.3587				-0.644645	56.8827
	-0.636637	42.2005				-0.636637	56.6037
	-0.628629	42.0423				-0.628629	56.3246
	-0.620621	41.8841				-0.620621	56.0456
	-0.612613	41.726				-0.612613	55.7666
	-0.604605	41.5678				-0.604605	55.4876
	-0.596597	41.4096				-0.596597	55.2086
	-0.588589	41.2514				-0.588589	54.9295
	-0.580581	41.0932				-0.580581	54.6505
	-0.572573	40.935				-0.572573	54.3715
	-0.564565	40.7769				-0.564565	54.0925
	-0.556557	40.6187				-0.556557	53.8134
	-0.548548	40.4605				-0.548548	53.5344
	-0.54054	40.3023				-0.54054	53.2554
	-0.532532	40.1441				-0.532532	52.9764
	-0.524524	39.986				-0.524524	52.6973
	-0.516517	39.8278				-0.516517	52.4183
	-0.508509	39.6696				-0.508509	52.1393
	-0.500501	39.5114				-0.500501	51.8603
	-0.492492	39.3532				-0.492492	51.5813
	-0.484484	39.195				-0.484484	51.3022
	-0.476477	39.0369				-0.476477	51.0232
	-0.468468	38.8787				-0.468468	50.7442
	-0.46046	38.7205				-0.46046	50.4652
	-0.452452	38.5623				-0.452452	50.1861
	-0.444444	38.4041				-0.444444	49.9071
	-0.436436	38.2459				-0.436436	49.6281
	-0.428428	38.0878				-0.428428	49.3491
	-0.42042	37.9296				-0.42042	49.07
	-0.412412	37.7714				-0.412412	48.791
	-0.404404	37.6132				-0.404404	48.512
	-0.396396	37.455				-0.396396	48.233
	-0.388388	37.2968				-0.388388	47.954
	-0.38038	37.1387				-0.38038	47.6749
	-0.372372	36.9805				-0.372372	47.3959
	-0.364364	36.8223				-0.364364	47.1169
	-0.356356	36.6641				-0.356356	46.8379
	-0.348348	36.5059				-0.348348	46.5588
	-0.34034	36.3477				-0.34034	46.2798
	-0.332332	36.1896				-0.332332	46.0008
	-0.324324	36.0314				-0.324324	45.7218
	-0.316316	35.8732				-0.316316	45.4427
	-0.308308	35.715				-0.308308	45.1637
	-0.3003	35.5568				-0.3003	44.8847
	-0.292292	35.3986				-0.292292	44.6057
	-0.284284	35.2405				-0.284284	44.3267
	-0.276276	35.0823				-0.276276	44.0476
	-0.268268	34.9241				-0.268268	43.7686
	-0.26026	34.7659				-0.26026	43.4896
	-0.252252	34.6077				-0.252252	43.2106
	-0.244244	34.4496				-0.244244	42.9315
	-0.236236	34.2914				-0.236236	42.6525
	-0.228228	34.1332				-0.228228	42.3735
	-0.22022	33.975				-0.22022	42.0945
	-0.212212	33.8168				-0.212212	41.8154
	-0.204204	33.6586				-0.204204	41.5364
	-0.196196	33.5005				-0.196196	41.2574
	-0.188188	33.3423				-0.188188	40.9784
	-0.18018	33.1841				-0.18018	40.6994
	-0.172172	33.0259				-0.172172	40.4203
	-0.164164	32.8677				-0.164164	40.1413
	-0.156156	32.7095				-0.156156	39.8623
	-0.148148	32.5514				-0.148148	39.5833
	-0.14014	32.3932				-0.14014	39.3042
	-0.132132	32.235				-0.132132	39.0252
	-0.124124	32.0768				-0.124124	38.7462
	-0.116116	31.9186				-0.116116	38.4672
	-0.108108	31.7604				-0.108108	38.1882
	-0.1001	31.6023				-0.1001	37.9091
	-0.0920921	31.4441				-0.0920921	37.6301
	-0.0840841	31.2859				-0.0840841	37.3511
	-0.0760761	31.1277				-0.0760761	37.0721
	-0.0680681	30.9695				-0.0680681	36.793
	-0.0600601	30.8113				-0.0600601	36.514
	-0.0520521	30.6532				-0.0520521	36.235
	-0.044044	30.495				-0.044044	35.956
	-0.036036	30.3368				-0.036036	35.6769
	-0.028028	30.1786				-0.028028	35.3979
	-0.02002	30.0204				-0.02002	35.1189
	-0.012012	29.8623				-0.012012	34.8399
	-0.004004	29.7041				-0.004004	34.5609
	0.004004	29.5459				0.004004	34.2818
	0.012012	29.3877				0.012012	34.0028
	0.02002	29.2295				0.02002	33.7238
	0.028028	29.0713				0.028028	33.4448
	0.036036	28.9132				0.036036	33.1657
	0.044044	28.755				0.044044	32.8867
	0.0520521	28.5968				0.0520521	32.6077
	0.0600601	28.4386				0.0600601	32.3287
	0.0680681	28.2804				0.0680681	32.0496
	0.0760761	28.1222				0.0760761	31.7706
	0.0840841	27.9641				0.0840841	31.4916
	0.0920921	27.8059				0.0920921	31.2126
	0.1001	27.6477				0.1001	30.9336
	0.108108	27.4895				0.108108	30.6545
	0.116116	27.3313				0.116116	30.3755
	0.124124	27.1731				0.124124	30.0965
	0.132132	27.015				0.132132	29.8175
	0.14014	26.8568				0.14014	29.5384
	0.148148	26.6986				0.148148	29.2594
	0.156156	26.5404				0.156156	28.9804
	0.164164	26.3822				0.164164	28.7014
	0.172172	26.224				0.172172	28.4223
	0.18018	26.0659				0.18018	28.1433
	0.188188	25.9077				0.188188	27.8643
	0.196196	25.7495				0.196196	27.5853
	0.204204	25.5913				0.204204	27.3062
	0.212212	25.4331				0.212212	27.0272
	0.22022	25.275				0.22022	26.7482
	0.228228	25.1168				0.228228	26.4692
	0.236236	24.9586				0.236236	26.1902
	0.244244	24.8004				0.244244	25.9111
	0.252252	24.6422				0.252252	25.6321
	0.26026	24.484				0.26026	25.3531
	0.268268	24.3259				0.268268	25.0741
	0.276276	24.1677				0.276276	24.795
	0.284284	24.0095				0.284284	24.516
	0.292292	23.8513				0.292292	24.237
	0.3003	23.6931				0.3003	23.958
	0.308308	23.5349				0.308308	23.679
	0.316316	23.3768				0.316316	23.3999
	0.324324	23.2186				0.324324	23.1209
	0.332332	23.0604				0.332332	22.8419
	0.34034	22.9022				0.34034	22.5629
	0.348348	22.744				0.348348	22.2838
	0.356356	22.5858				0.356356	22.0048
	0.364364	22.4277				0.364364	21.7258
	0.372372	22.2695				0.372372	21.4468
	0.38038	22.1113				0.38038	21.1677
	0.388388	21.9531				0.388388	20.8887
	0.396396	21.7949				0.396396	20.6097
	0.404404	21.6367				0.404404	20.3307
	0.412412	21.4786				0.412412	20.0517
	0.42042	21.3204				0.42042	19.7726
	0.428428	21.1622				0.428428	19.4936
	0.436436	21.004				0.436436	19.2146
	0.444444	20.8458				0.444444	18.9356
	0.452452	20.6877				0.452452	18.6565
	0.46046	20.5295				0.46046	18.3775
	0.468468	20.3713				0.468468	18.0985
	0.476477	20.2131				0.476477	17.8195
	0.484484	20.0549				0.484484	17.5404
	0.492492	19.8967				0.492492	17.2614
	0.500501	19.7386				0.500501	16.9824
	0.508509	19.5804				0.508509	16.7034
	0.516517	19.4222				0.516517	16.4244
	0.524524	19.264				0.524524	16.1453
	0.532532	19.1058				0.532532	15.8663
	0.54054	18.9476				0.54054	15.5873
	0.548548	18.7895				0.548548	15.3083
	0.556557	18.6313				0.556557	15.0292
	0.564565	18.4731				0.564565	14.7502
	0.572573	18.3149				0.572573	14.4712
	0.580581	18.1567				0.580581	14.1922
	0.588589	17.9985				0.588589	13.9131
	0.596597	17.8404				0.596597	13.6341
	0.604605	17.6822				0.604605	13.3551
	0.612613	17.524				0.612613	13.0761
	0.620621	17.3658				0.620621	12.7971
	0.628629	17.2076				0.628629	12.518
	0.636637	17.0494				0.636637	12.239
	0.644645	16.8913				0.644645	11.96
	0.652653	16.7331				0.652653	11.681
	0.660661	16.5749				0.660661	11.4019
	0.668669	16.4167				0.668669	11.1229
	0.676677	16.2585				0.676677	10.8439
	0.684685	16.1003				0.684685	10.5649
	0.692693	15.9422				0.692693	10.2858
	0.700701	15.784				0.700701	10.0068
	0.708709	15.6258				0.708709	9.7278
	0.716717	15.4676				0.716717	9.44878
	0.724725	15.3094				0.724725	9.16976
	0.732733	15.1513				0.732733	8.89073
	0.740741	14.9931				0.740741	8.61171
	0.748749	14.8349				0.748749	8.33268
	0.756757	14.6767				0.756757	8.05366
	0.764765	14.5185				0.764765	7.77464
	0.772773	14.3603				0.772773	7.49562
	0.780781	14.2022				0.780781	7.21659
	0.788789	14.044				0.788789	6.93757
	0.796797	13.8858				0.796797	6.65855
	0.804805	13.7276				0.804805	6.37952
	0.812813	13.5694				0.812813	6.1005
	0.820821	13.4112				0.820821	5.82148
	0.828829	13.2531				0.828829	5.54246
	0.836837	13.0949				0.836837	5.26343
	0.844845	12.9367				0.844845	4.98441
	0.852853	12.7785				0.852853	4.70539
	0.860861	12.6203				0.860861	4.42636
	0.868869	12.4621				0.868869	4.14734
	0.876877	12.304				0.876877	3.86832
	0.884885	12.1458				0.884885	3.58929
	0.892893	11.9876				0.892893	3.31027
	0.900901	11.8294				0.900901	3.03125
	0.908909	11.6712				0.908909	2.75223
	0.916917	11.513				0.916917	2.4732
	0.924925	11.3549				0.924925	2.19418
	0.932933	11.1967				0.932933	1.91516
	0.940941	11.0385				0.940941	1.63613
	0.948949	10.8803				0.948949	1.35711
	0.956957	10.7221				0.956957	1.07809
	0.964965	10.564				0.964965	0.799064
	0.972973	10.4058				0.972973	0.520041
	0.980981	10.2476				0.980981	0.241018
	0.988989	10.0894				0.988989	-0.0380046
	0.996997	9.93122				0.996997	-0.317028
	1.005	9.77304				1.005	-0.596051
	1.01301	9.61486				1.01301	-0.875074
	1.02102	9.45667				1.02102	-1.1541
	1.02903	9.29849				1.02903	-1.43312
	1.03704	9.14031				1.03704	-1.71214
	1.04505	8.98212				1.04505	-1.99117
	1.05305	8.82394				1.05305	-2.27019
	1.06106	8.66576				1.06106	-2.54921
	1.06907	8.50758				1.06907	-2.82823
	1.07708	8.34939				1.07708	-3.10726
	1.08509	8.19121				1.08509	-3.38628
	1.09309	8.03303				1.09309	-3.6653
	1.1011	7.87484				1.1011	-3.94433
	1.10911	7.71666				1.10911	-4.22335
	1.11712	7.55848				1.11712	-4.50237
	1.12513	7.4003				1.12513	-4.7814
	1.13313	7.24211				1.13313	-5.06042
	1.14114	7.08393				1.14114	-5.33944
	1.14915	6.92575				1.14915	-5.61846
	1.15716	6.76757				1.15716	-5.89749
	1.16517	6.60938				1.16517	-6.17651
	1.17317	6.4512				1.17317	-6.45553
	1.18118	6.29302				1.18118	-6.73456
	1.18919	6.13483				1.18919	-7.01358
	1.1972	5.97665				1.1972	-7.2926
	1.20521	5.81847				1.20521	-7.57163
	1.21321	5.66029				1.21321	-7.85065
	1.22122	5.5021				1.22122	-8.12967
	1.22923	5.34392				1.22923	-8.40869
	1.23724	5.18574				1.23724	-8.68772
	1.24525	5.02755				1.24525	-8.96674
	1.25325	4.86937				1.25325	-9.24576
	1.26126	4.71119				1.26126	-9.52479
	1.26927	4.55301				1.26927	-9.80381
	1.27728	4.39482				1.27728	-10.0828
	1.28529	4.23664				1.28529	-10.3619
	1.29329	4.07846				1.29329	-10.6409
	1.3013	3.92028				1.3013	-10.9199
	1.30931	3.76209				1.30931	-11.1989
	1.31732	3.60391				1.31732	-11.4779
	1.32533	3.44573				1.32533	-11.757
	1.33333	3.28754				1.33333	-12.036
	1.34134	3.12936				1.34134	-12.315
	1.34935	2.97118				1.34935	-12.594
	1.35736	2.813				1.35736	-12.8731
	1.36537	2.65481				1.36537	-13.1521
	1.37337	2.49663				1.37337	-13.4311
	1.38138	2.33845				1.38138	-13.7101
	1.38939	2.18026				1.38939	-13.9892
	1.3974	2.02208				1.3974	-14.2682
	1.40541	1.8639				1.40541	-14.5472
	1.41341	1.70572				1.41341	-14.8262
	1.42142	1.54753				1.42142	-15.1052
	1.42943	1.38935				1.42943	-15.3843
	1.43744	1.23117				1.43744	-15.6633
	1.44545	1.07298				1.44545	-15.9423
	1.45345	0.914802				1.45345	-16.2213
	1.46146	0.756619				1.46146	-16.5004
	1.46947	0.598437				1.46947	-16.7794
	1.47748	0.440254				1.47748	-17.0584
	1.48549	0.282071				1.48549	-17.3374
	1.49349	0.123888				1.49349	-17.6165
	1.5015	-0.0342946				1.5015	-17.8955
	1.50951	-0.192477				1.50951	-18.1745
	1.51752	-0.35066				1.51752	-18.4535
	1.52553	-0.508843				1.52553	-18.7325
	1.53353	-0.667026				1.53353	-19.0116
	1.54154	-0.825209				1.54154	-19.2906
	1.54955	-0.983391				1.54955	-19.5696
	1.55756	-1.14157				1.55756	-19.8486
	1.56557	-1.29976				1.56557	-20.1277
	1.57357	-1.45794				1.57357	-20.4067
	1.58158	-1.61612				1.58158	-20.6857
	1.58959	-1.77431				1.58959	-20.9647
	1.5976	-1.93249				1.5976	-21.2438
	1.60561	-2.09067				1.60561	-21.5228
	1.61361	-2.24885				1.61361	-21.8018
	1.62162	-2.40704				1.62162	-22.0808
	1.62963	-2.56522				1.62963	-22.3598
	1.63764	-2.7234				1.63764	-22.6389
	1.64565	-2.88158				1.64565	-22.9179
	1.65365	-3.03977				1.65365	-23.1969
	1.66166	-3.19795				1.66166	-23.4759
	1.66967	-3.35613				1.66967	-23.755
	1.67768	-3.51432				1.67768	-24.034
	1.68569	-3.6725				1.68569	-24.313
	1.69369	-3.83068				1.69369	-24.592
	1.7017	-3.98886				1.7017	-24.8711
	1.70971	-4.14705				1.70971	-25.1501
	1.71772	-4.30523				1.71772	-25.4291
	1.72573	-4.46341				1.72573	-25.7081
	1.73373	-4.6216				1.73373	-25.9871
	1.74174	-4.77978				1.74174	-26.2662
	1.74975	-4.93796				1.74975	-26.5452
	1.75776	-5.09614				1.75776	-26.8242
	1.76577	-5.25433				1.76577	-27.1032
	1.77377	-5.41251				1.77377	-27.3823
	1.78178	-5.57069				1.78178	-27.6613
	1.78979	-5.72887				1.78979	-27.9403
	1.7978	-5.88706				1.7978	-28.2193
	1.80581	-6.04524				1.80581	-28.4984
	1.81381	-6.20342				1.81381	-28.7774
	1.82182	-6.36161				1.82182	-29.0564
	1.82983	-6.51979				1.82983	-29.3354
	1.83784	-6.67797				1.83784	-29.6144
	1.84585	-6.83615				1.84585	-29.8935
	1.85385	-6.99434				1.85385	-30.1725
	1.86186	-7.15252				1.86186	-30.4515
	1.86987	-7.3107				1.86987	-30.7305
	1.87788	-7.46889				1.87788	-31.0096
	1.88589	-7.62707				1.88589	-31.2886
	1.89389	-7.78525				1.89389	-31.5676
	1.9019	-7.94343				1.9019	-31.8466
	1.90991	-8.10162				1.90991	-32.1257
	1.91792	-8.2598				1.91792	-32.4047
	1.92593	-8.41798				1.92593	-32.6837
	1.93393	-8.57616				1.93393	-32.9627
	1.94194	-8.73435				1.94194	-33.2417
	1.94995	-8.89253				1.94995	-33.5208
	1.95796	-9.05071				1.95796	-33.7998
	1.96597	-9.2089				1.96597	-34.0788
	1.97397	-9.36708				1.97397	-34.3578
	1.98198	-9.52526				1.98198	-34.6369
	1.98999	-9.68344				1.98999	-34.9159
	1.998	-9.84163				1.998	-35.1949
	2.00601	-9.99981				2.00601	-35.4739
	2.01401	-10.158				2.01401	-35.7529
	2.02202	-10.3162				2.02202	-36.032
	2.03003	-10.4744				2.03003	-36.311
	2.03804	-10.6325				2.03804	-36.59
	2.04605	-10.7907				2.04605	-36.869
	2.05405	-10.9489				2.05405	-37.1481
	2.06206	-11.1071				2.06206	-37.4271
	2.07007	-11.2653				2.07007	-37.7061
	2.07808	-11.4235				2.07808	-37.9851
	2.08609	-11.5816				2.08609	-38.2642
	2.09409	-11.7398				2.09409	-38.5432
	2.1021	-11.898				2.1021	-38.8222
	2.11011	-12.0562				2.11011	-39.1012
	2.11812	-12.2144				2.11812	-39.3802
	2.12613	-12.3726				2.12613	-39.6593
	2.13413	-12.5307				2.13413	-39.9383
	2.14214	-12.6889				2.14214	-40.2173
	2.15015	-12.8471				2.15015	-40.4963
	2.15816	-13.0053				2.15816	-40.7754
	2.16617	-13.1635				2.16617	-41.0544
	2.17417	-13.3216				2.17417	-41.3334
	2.18218	-13.4798				2.18218	-41.6124
	2.19019	-13.638				2.19019	-41.8915
	2.1982	-13.7962				2.1982	-42.1705
	2.20621	-13.9544				2.20621	-42.4495
	2.21421	-14.1126				2.21421	-42.7285
	2.22222	-14.2707				2.22222	-43.0076
	2.23023	-14.4289				2.23023	-43.2866
	2.23824	-14.5871				2.23824	-43.5656
	2.24625	-14.7453				2.24625	-43.8446
	2.25425	-14.9035				2.25425	-44.1236
	2.26226	-15.0617				2.26226	-44.4027
	2.27027	-15.2198				2.27027	-44.6817
	2.27828	-15.378				2.27828	-44.9607
	2.28629	-15.5362				2.28629	-45.2397
	2.29429	-15.6944				2.29429	-45.5188
	2.3023	-15.8526				2.3023	-45.7978
	2.31031	-16.0108				2.31031	-46.0768
	2.31832	-16.1689				2.31832	-46.3558
	2.32633	-16.3271				2.32633	-46.6348
	2.33433	-16.4853				2.33433	-46.9139
	2.34234	-16.6435				2.34234	-47.1929
	2.35035	-16.8017				2.35035	-47.4719
	2.35836	-16.9599				2.35836	-47.7509
	2.36637	-17.118				2.36637	-48.03
	2.37437	-17.2762				2.37437	-48.309
	2.38238	-17.4344				2.38238	-48.588
	2.39039	-17.5926				2.39039	-48.867
	2.3984	-17.7508				2.3984	-49.1461
	2.40641	-17.9089				2.40641	-49.4251
	2.41441	-18.0671				2.41441	-49.7041
	2.42242	-18.2253				2.42242	-49.9831
	2.43043	-18.3835				2.43043	-50.2621
	2.43844	-18.5417				2.43844	-50.5412
	2.44645	-18.6999				2.44645	-50.8202
	2.45445	-18.858				2.45445	-51.0992
	2.46246	-19.0162				2.46246	-51.3782
	2.47047	-19.1744				2.47047	-51.6573
	2.47848	-19.3326				2.47848	-51.9363
	2.48649	-19.4908				2.48649	-52.2153
	2.49449	-19.649				2.49449	-52.4943
	2.5025	-19.8071				2.5025	-52.7734
	2.51051	-19.9653				2.51051	-53.0524
	2.51852	-20.1235				2.51852	-53.3314
	2.52653	-20.2817				2.52653	-53.6104
	2.53453	-20.4399				2.53453	-53.8894
	2.54254	-20.5981				2.54254	-54.1685
	2.55055	-20.7562				2.55055	-54.4475
	2.55856	-20.9144				2.55856	-54.7265
	2.56657	-21.0726				2.56657	-55.0055
	2.57457	-21.2308				2.57457	-55.2846
	2.58258	-21.389				2.58258	-55.5636
	2.59059	-21.5472				2.59059	-55.8426
	2.5986	-21.7053				2.5986	-56.1216
	2.60661	-21.8635				2.60661	-56.4007
	2.61461	-22.0217				2.61461	-56.6797
	2.62262	-22.1799				2.62262	-56.9587
	2.63063	-22.3381				2.63063	-57.2377
	2.63864	-22.4962				2.63864	-57.5167
	2.64665	-22.6544				2.64665	-57.7958
	2.65465	-22.8126				2.65465	-58.0748
	2.66266	-22.9708				2.66266	-58.3538
	2.67067	-23.129				2.67067	-58.6328
	2.67868	-23.2872				2.67868	-58.9119
	2.68669	-23.4453				2.68669	-59.1909
	2.69469	-23.6035				2.69469	-59.4699
	2.7027	-23.7617				2.7027	-59.7489
	2.71071	-23.9199				2.71071	-60.0279
	2.71872	-24.0781				2.71872	-60.307
	2.72673	-24.2363				2.72673	-60.586
	2.73473	-24.3944				2.73473	-60.865
	2.74274	-24.5526				2.74274	-61.144
	2.75075	-24.7108				2.75075	-61.4231
	2.75876	-24.869				2.75876	-61.7021
	2.76677	-25.0272				2.76677	-61.9811
	2.77477	-25.1854				2.77477	-62.2601
	2.78278	-25.3435				2.78278	-62.5392
	2.79079	-25.5017				2.79079	-62.8182
	2.7988	-25.6599				2.7988	-63.0972
	2.80681	-25.8181				2.80681	-63.3762
	2.81481	-25.9763				2.81481	-63.6553
	2.82282	-26.1345				2.82282	-63.9343
	2.83083	-26.2926				2.83083	-64.2133
	2.83884	-26.4508				2.83884	-64.4923
	2.84685	-26.609				2.84685	-64.7713
	2.85485	-26.7672				2.85485	-65.0504
	2.86286	-26.9254				2.86286	-65.3294
	2.87087	-27.0835				2.87087	-65.6084
	2.87888	-27.2417				2.87888	-65.8874
	2.88689	-27.3999				2.88689	-66.1665
	2.89489	-27.5581				2.89489	-66.4455
	2.9029	-27.7163				2.9029	-66.7245
	2.91091	-27.8745				2.91091	-67.0035
	2.91892	-28.0326				2.91892	-67.2826
	2.92693	-28.1908				2.92693	-67.5616
	2.93493	-28.349				2.93493	-67.8406
	2.94294	-28.5072				2.94294	-68.1196
	2.95095	-28.6654				2.95095	-68.3986
	2.95896	-28.8236				2.95896	-68.6777
	2.96697	-28.9817				2.96697	-68.9567
	2.97497	-29.1399				2.97497	-69.2357
	2.98298	-29.2981				2.98298	-69.5147
	2.99099	-29.4563				2.99099	-69.7938
	2.999	-29.6145				2.999	-70.0728
	3.00701	-29.7727				3.00701	-70.3518
	3.01502	-29.9308				3.01502	-70.6308
	3.02302	-30.089				3.02302	-70.9099
	3.03103	-30.2472				3.03103	-71.1889
	3.03904	-30.4054				3.03904	-71.4679
	3.04705	-30.5636				3.04705	-71.7469
	3.05506	-30.7218				3.05506	-72.0259
	3.06306	-30.8799				3.06306	-72.305
	3.07107	-31.0381				3.07107	-72.584
	3.07908	-31.1963				3.07908	-72.863
	3.08709	-31.3545				3.08709	-73.142
	3.0951	-31.5127				3.0951	-73.4211
	3.1031	-31.6709				3.1031	-73.7001
	3.11111	-31.829				3.11111	-73.9791
	3.11912	-31.9872				3.11912	-74.2581
	3.12713	-32.1454				3.12713	-74.5371
	3.13514	-32.3036				3.13514	-74.8162
	3.14314	-32.4618				3.14314	-75.0952
	3.15115	-32.62				3.15115	-75.3742
	3.15916	-32.7781				3.15916	-75.6532
	3.16717	-32.9363				3.16717	-75.9323
	3.17518	-33.0945				3.17518	-76.2113
	3.18318	-33.2527				3.18318	-76.4903
	3.19119	-33.4109				3.19119	-76.7693
	3.1992	-33.569				3.1992	-77.0484
	3.20721	-33.7272				3.20721	-77.3274
	3.21522	-33.8854				3.21522	-77.6064
	3.22322	-34.0436				3.22322	-77.8854
	3.23123	-34.2018				3.23123	-78.1644
	3.23924	-34.36				3.23924	-78.4435
	3.24725	-34.5181				3.24725	-78.7225
	3.25526	-34.6763				3.25526	-79.0015
	3.26326	-34.8345				3.26326	-79.2805
	3.27127	-34.9927				3.27127	-79.5596
	3.27928	-35.1509				3.27928	-79.8386
	3.28729	-35.3091				3.28729	-80.1176
	3.2953	-35.4672				3.2953	-80.3966
	3.3033	-35.6254				3.3033	-80.6757
	3.31131	-35.7836				3.31131	-80.9547
	3.31932	-35.9418				3.31932	-81.2337
	3.32733	-36.1				3.32733	-81.5127
	3.33534	-36.2582				3.33534	-81.7917
	3.34334	-36.4163				3.34334	-82.0708
	3.35135	-36.5745				3.35135	-82.3498
	3.35936	-36.7327				3.35936	-82.6288
	3.36737	-36.8909				3.36737	-82.9078
	3.37538	-37.0491				3.37538	-83.1869
	3.38338	-37.2073				3.38338	-83.4659
	3.39139	-37.3654				3.39139	-83.7449
	3.3994	-37.5236				3.3994	-84.0239
	3.40741	-37.6818				3.40741	-84.303
	3.41542	-37.84				3.41542	-84.582
	3.42342	-37.9982				3.42342	-84.861
	3.43143	-38.1563				3.43143	-85.14
	3.43944	-38.3145				3.43944	-85.419
	3.44745	-38.4727				3.44745	-85.6981
	3.45546	-38.6309				3.45546	-85.9771
	3.46346	-38.7891				3.46346	-86.2561
	3.47147	-38.9473				3.47147	-86.5351
	3.47948	-39.1054				3.47948	-86.8142
	3.48749	-39.2636				3.48749	-87.0932
	3.4955	-39.4218				3.4955	-87.3722
	3.5035	-39.58				3.5035	-87.6512
	3.51151	-39.7382				3.51151	-87.9303
	3.51952	-39.8964				3.51952	-88.2093
	3.52753	-40.0545				3.52753	-88.4883
	3.53554	-40.2127				3.53554	-88.7673
	3.54354	-40.3709				3.54354	-89.0463
	3.55155	-40.5291				3.55155	-89.3254
	3.55956	-40.6873				3.55956	-89.6044
	3.56757	-40.8454				3.56757	-89.8834
	3.57558	-41.0036				3.57558	-90.1624
	3.58358	-41.1618				3.58358	-90.4415
	3.59159	-41.32				3.59159	-90.7205
	3.5996	-41.4782				3.5996	-90.9995
	3.60761	-41.6364				3.60761	-91.2785
	3.61562	-41.7945				3.61562	-91.5576
	3.62362	-41.9527				3.62362	-91.8366
	3.63163	-42.1109				3.63163	-92.1156
	3.63964	-42.2691				3.63964	-92.3946
	3.64765	-42.4273				3.64765	-92.6736
	3.65566	-42.5855				3.65566	-92.9527
	3.66366	-42.7436				3.66366	-93.2317
	3.67167	-42.9018				3.67167	-93.5107
	3.67968	-43.06				3.67968	-93.7897
	3.68769	-43.2182				3.68769	-94.0688
	3.6957	-43.3764				3.6957	-94.3478
	3.7037	-43.5346				3.7037	-94.6268
	3.71171	-43.6927				3.71171	-94.9058
	3.71972	-43.8509				3.71972	-95.1848
	3.72773	-44.0091				3.72773	-95.4639
	3.73574	-44.1673				3.73574	-95.7429
	3.74374	-44.3255				3.74374	-96.0219
	3.75175	-44.4837				3.75175	-96.3009
	3.75976	-44.6418				3.75976	-96.58
	3.76777	-44.8				3.76777	-96.859
	3.77578	-44.9582				3.77578	-97.138
	3.78378	-45.1164				3.78378	-97.417
	3.79179	-45.2746				3.79179	-97.6961
	3.7998	-45.4328				3.7998	-97.9751
	3.80781	-45.5909				3.80781	-98.2541
	3.81582	-45.7491				3.81582	-98.5331
	3.82382	-45.9073				3.82382	-98.8122
	3.83183	-46.0655				3.83183	-99.0912
	3.83984	-46.2237				3.83984	-99.3702
	3.84785	-46.3819				3.84785	-99.6492
	3.85586	-46.54				3.85586	-99.9282
	3.86386	-46.6982				3.86386	-100.207
	3.87187	-46.8564				3.87187	-100.486
	3.87988	-47.0146				3.87988	-100.765
	3.88789	-47.1728				3.88789	-101.044
	3.8959	-47.3309				3.8959	-101.323
	3.9039	-47.4891				3.9039	-101.602
	3.91191	-47.6473				3.91191	-101.881
	3.91992	-47.8055				3.91992	-102.16
	3.92793	-47.9637				3.92793	-102.439
	3.93594	-48.1219				3.93594	-102.718
	3.94394	-48.28				3.94394	-102.998
	3.95195	-48.4382				3.95195	-103.277
	3.95996	-48.5964				3.95996	-103.556
	3.96797	-48.7546				3.96797	-103.835
	3.97598	-48.9128				3.97598	-104.114
	3.98398	-49.071				3.98398	-104.393
	3.99199	-49.2291				3.99199	-104.672
	4	-49.3873				4	-104.951

## Sheet: Fig.4k
	OT_in-group	OT_out-group	saline_in-group	saline_out-group
K-A	0.6	0.76	1.36	1.36
L-K	0.54	0.98	1.46	2
C-L	0	0	0.2	0.16
L-A	1.14	1.74	2.82	3.36
C-K	0.54	0.98	1.26	1.84
C-A	1.14	1.74	2.62	3.2
