# Supplementary material for: Multi-dimensional social relationships shape social attention in monkeys
Source: eLife. 2025 Mar 7;14:RP104460. doi: 10.7554/eLife.104460 (PMC11888598; doi:10.7554/eLife.104460)
Supplement: Figure 5—source data 1. [file elife-104460-fig5-data1.xlsx]

## Sheet: Fig.5c
	weight
aggression	0.54
grooming	0
proximity	0.04

## Sheet: Fig.5d
	individual engagement index	distractor bias (ms)			individual engagement index	distractor bias (ms)
sacatter point	-0.04	65.1199		fitted curve	-2	-82.8236
	0.58	77.4365			-1.996	-82.6084
	0.58	73.0998			-1.99199	-82.3931
	0.04	45.1722			-1.98799	-82.1779
	0.5	23.0542			-1.98398	-81.9627
	0.5	56.204			-1.97998	-81.7474
	-0.58	1.8084			-1.97598	-81.5322
	-0.5	-4.35444			-1.97197	-81.3169
	0.58	10.4787			-1.96797	-81.1017
	-0.58	-26.776			-1.96396	-80.8864
	-0.5	-11.7361			-1.95996	-80.6712
	-0.58	-13.2462			-1.95596	-80.456
					-1.95195	-80.2407
					-1.94795	-80.0255
					-1.94394	-79.8103
					-1.93994	-79.595
					-1.93594	-79.3798
					-1.93193	-79.1645
					-1.92793	-78.9493
					-1.92392	-78.7341
					-1.91992	-78.5188
					-1.91592	-78.3036
					-1.91191	-78.0883
					-1.90791	-77.8731
					-1.9039	-77.6579
					-1.8999	-77.4426
					-1.8959	-77.2274
					-1.89189	-77.0121
					-1.88789	-76.7969
					-1.88388	-76.5817
					-1.87988	-76.3664
					-1.87588	-76.1512
					-1.87187	-75.936
					-1.86787	-75.7207
					-1.86386	-75.5055
					-1.85986	-75.2902
					-1.85586	-75.075
					-1.85185	-74.8598
					-1.84785	-74.6445
					-1.84384	-74.4293
					-1.83984	-74.214
					-1.83584	-73.9988
					-1.83183	-73.7836
					-1.82783	-73.5683
					-1.82382	-73.3531
					-1.81982	-73.1378
					-1.81582	-72.9226
					-1.81181	-72.7074
					-1.80781	-72.4921
					-1.8038	-72.2769
					-1.7998	-72.0616
					-1.7958	-71.8464
					-1.79179	-71.6312
					-1.78779	-71.4159
					-1.78378	-71.2007
					-1.77978	-70.9855
					-1.77578	-70.7702
					-1.77177	-70.555
					-1.76777	-70.3397
					-1.76376	-70.1245
					-1.75976	-69.9093
					-1.75576	-69.694
					-1.75175	-69.4788
					-1.74775	-69.2635
					-1.74374	-69.0483
					-1.73974	-68.8331
					-1.73574	-68.6178
					-1.73173	-68.4026
					-1.72773	-68.1873
					-1.72372	-67.9721
					-1.71972	-67.7569
					-1.71572	-67.5416
					-1.71171	-67.3264
					-1.70771	-67.1111
					-1.7037	-66.8959
					-1.6997	-66.6807
					-1.6957	-66.4654
					-1.69169	-66.2502
					-1.68769	-66.0349
					-1.68368	-65.8197
					-1.67968	-65.6045
					-1.67568	-65.3892
					-1.67167	-65.174
					-1.66767	-64.9587
					-1.66366	-64.7435
					-1.65966	-64.5283
					-1.65566	-64.313
					-1.65165	-64.0978
					-1.64765	-63.8826
					-1.64364	-63.6673
					-1.63964	-63.4521
					-1.63564	-63.2368
					-1.63163	-63.0216
					-1.62763	-62.8064
					-1.62362	-62.5911
					-1.61962	-62.3759
					-1.61562	-62.1606
					-1.61161	-61.9454
					-1.60761	-61.7302
					-1.6036	-61.5149
					-1.5996	-61.2997
					-1.5956	-61.0844
					-1.59159	-60.8692
					-1.58759	-60.654
					-1.58358	-60.4387
					-1.57958	-60.2235
					-1.57558	-60.0082
					-1.57157	-59.793
					-1.56757	-59.5778
					-1.56356	-59.3625
					-1.55956	-59.1473
					-1.55556	-58.932
					-1.55155	-58.7168
					-1.54755	-58.5016
					-1.54354	-58.2863
					-1.53954	-58.0711
					-1.53554	-57.8559
					-1.53153	-57.6406
					-1.52753	-57.4254
					-1.52352	-57.2101
					-1.51952	-56.9949
					-1.51552	-56.7797
					-1.51151	-56.5644
					-1.50751	-56.3492
					-1.5035	-56.1339
					-1.4995	-55.9187
					-1.4955	-55.7035
					-1.49149	-55.4882
					-1.48749	-55.273
					-1.48348	-55.0577
					-1.47948	-54.8425
					-1.47548	-54.6273
					-1.47147	-54.412
					-1.46747	-54.1968
					-1.46346	-53.9815
					-1.45946	-53.7663
					-1.45546	-53.5511
					-1.45145	-53.3358
					-1.44745	-53.1206
					-1.44344	-52.9053
					-1.43944	-52.6901
					-1.43544	-52.4749
					-1.43143	-52.2596
					-1.42743	-52.0444
					-1.42342	-51.8291
					-1.41942	-51.6139
					-1.41542	-51.3987
					-1.41141	-51.1834
					-1.40741	-50.9682
					-1.4034	-50.753
					-1.3994	-50.5377
					-1.3954	-50.3225
					-1.39139	-50.1072
					-1.38739	-49.892
					-1.38338	-49.6768
					-1.37938	-49.4615
					-1.37538	-49.2463
					-1.37137	-49.031
					-1.36737	-48.8158
					-1.36336	-48.6006
					-1.35936	-48.3853
					-1.35536	-48.1701
					-1.35135	-47.9548
					-1.34735	-47.7396
					-1.34334	-47.5244
					-1.33934	-47.3091
					-1.33534	-47.0939
					-1.33133	-46.8787
					-1.32733	-46.6634
					-1.32332	-46.4482
					-1.31932	-46.2329
					-1.31532	-46.0177
					-1.31131	-45.8025
					-1.30731	-45.5872
					-1.3033	-45.372
					-1.2993	-45.1567
					-1.2953	-44.9415
					-1.29129	-44.7263
					-1.28729	-44.511
					-1.28328	-44.2958
					-1.27928	-44.0805
					-1.27528	-43.8653
					-1.27127	-43.6501
					-1.26727	-43.4348
					-1.26326	-43.2196
					-1.25926	-43.0043
					-1.25526	-42.7891
					-1.25125	-42.5739
					-1.24725	-42.3586
					-1.24324	-42.1434
					-1.23924	-41.9281
					-1.23524	-41.7129
					-1.23123	-41.4977
					-1.22723	-41.2824
					-1.22322	-41.0672
					-1.21922	-40.852
					-1.21522	-40.6367
					-1.21121	-40.4215
					-1.20721	-40.2062
					-1.2032	-39.991
					-1.1992	-39.7758
					-1.1952	-39.5605
					-1.19119	-39.3453
					-1.18719	-39.13
					-1.18318	-38.9148
					-1.17918	-38.6996
					-1.17518	-38.4843
					-1.17117	-38.2691
					-1.16717	-38.0538
					-1.16316	-37.8386
					-1.15916	-37.6234
					-1.15516	-37.4081
					-1.15115	-37.1929
					-1.14715	-36.9776
					-1.14314	-36.7624
					-1.13914	-36.5472
					-1.13514	-36.3319
					-1.13113	-36.1167
					-1.12713	-35.9014
					-1.12312	-35.6862
					-1.11912	-35.471
					-1.11512	-35.2557
					-1.11111	-35.0405
					-1.10711	-34.8253
					-1.1031	-34.61
					-1.0991	-34.3948
					-1.09509	-34.1795
					-1.09109	-33.9643
					-1.08709	-33.7491
					-1.08308	-33.5338
					-1.07908	-33.3186
					-1.07508	-33.1033
					-1.07107	-32.8881
					-1.06707	-32.6729
					-1.06306	-32.4576
					-1.05906	-32.2424
					-1.05506	-32.0271
					-1.05105	-31.8119
					-1.04705	-31.5967
					-1.04304	-31.3814
					-1.03904	-31.1662
					-1.03503	-30.9509
					-1.03103	-30.7357
					-1.02703	-30.5205
					-1.02302	-30.3052
					-1.01902	-30.09
					-1.01502	-29.8747
					-1.01101	-29.6595
					-1.00701	-29.4443
					-1.003	-29.229
					-0.998999	-29.0138
					-0.994995	-28.7986
					-0.990991	-28.5833
					-0.986987	-28.3681
					-0.982983	-28.1528
					-0.978979	-27.9376
					-0.974975	-27.7224
					-0.970971	-27.5071
					-0.966967	-27.2919
					-0.962963	-27.0766
					-0.958959	-26.8614
					-0.954955	-26.6462
					-0.950951	-26.4309
					-0.946947	-26.2157
					-0.942943	-26.0004
					-0.938939	-25.7852
					-0.934935	-25.57
					-0.930931	-25.3547
					-0.926927	-25.1395
					-0.922923	-24.9242
					-0.918919	-24.709
					-0.914915	-24.4938
					-0.910911	-24.2785
					-0.906907	-24.0633
					-0.902903	-23.848
					-0.898899	-23.6328
					-0.894895	-23.4176
					-0.890891	-23.2023
					-0.886887	-22.9871
					-0.882883	-22.7719
					-0.878879	-22.5566
					-0.874875	-22.3414
					-0.870871	-22.1261
					-0.866867	-21.9109
					-0.862863	-21.6957
					-0.858859	-21.4804
					-0.854855	-21.2652
					-0.850851	-21.0499
					-0.846847	-20.8347
					-0.842843	-20.6195
					-0.838839	-20.4042
					-0.834835	-20.189
					-0.830831	-19.9737
					-0.826827	-19.7585
					-0.822823	-19.5433
					-0.818819	-19.328
					-0.814815	-19.1128
					-0.810811	-18.8975
					-0.806807	-18.6823
					-0.802803	-18.4671
					-0.798799	-18.2518
					-0.794795	-18.0366
					-0.790791	-17.8213
					-0.786787	-17.6061
					-0.782783	-17.3909
					-0.778779	-17.1756
					-0.774775	-16.9604
					-0.770771	-16.7452
					-0.766767	-16.5299
					-0.762763	-16.3147
					-0.758759	-16.0994
					-0.754755	-15.8842
					-0.750751	-15.669
					-0.746747	-15.4537
					-0.742743	-15.2385
					-0.738739	-15.0232
					-0.734735	-14.808
					-0.730731	-14.5928
					-0.726727	-14.3775
					-0.722723	-14.1623
					-0.718719	-13.947
					-0.714715	-13.7318
					-0.710711	-13.5166
					-0.706707	-13.3013
					-0.702703	-13.0861
					-0.698699	-12.8708
					-0.694695	-12.6556
					-0.690691	-12.4404
					-0.686687	-12.2251
					-0.682683	-12.0099
					-0.678679	-11.7946
					-0.674675	-11.5794
					-0.670671	-11.3642
					-0.666667	-11.1489
					-0.662663	-10.9337
					-0.658659	-10.7185
					-0.654655	-10.5032
					-0.650651	-10.288
					-0.646647	-10.0727
					-0.642643	-9.8575
					-0.638639	-9.64226
					-0.634635	-9.42702
					-0.630631	-9.21178
					-0.626627	-8.99654
					-0.622623	-8.7813
					-0.618619	-8.56606
					-0.614615	-8.35082
					-0.610611	-8.13558
					-0.606607	-7.92034
					-0.602603	-7.7051
					-0.598599	-7.48986
					-0.594595	-7.27462
					-0.590591	-7.05938
					-0.586587	-6.84415
					-0.582583	-6.62891
					-0.578579	-6.41367
					-0.574575	-6.19843
					-0.570571	-5.98319
					-0.566567	-5.76795
					-0.562563	-5.55271
					-0.558559	-5.33747
					-0.554555	-5.12223
					-0.550551	-4.90699
					-0.546547	-4.69175
					-0.542543	-4.47651
					-0.538539	-4.26127
					-0.534535	-4.04603
					-0.530531	-3.8308
					-0.526527	-3.61556
					-0.522523	-3.40032
					-0.518518	-3.18508
					-0.514514	-2.96984
					-0.51051	-2.7546
					-0.506506	-2.53936
					-0.502502	-2.32412
					-0.498499	-2.10888
					-0.494495	-1.89364
					-0.49049	-1.6784
					-0.486486	-1.46316
					-0.482482	-1.24792
					-0.478478	-1.03269
					-0.474474	-0.817446
					-0.47047	-0.602207
					-0.466466	-0.386967
					-0.462462	-0.171728
					-0.458458	0.0435111
					-0.454454	0.25875
					-0.45045	0.47399
					-0.446446	0.689229
					-0.442442	0.904468
					-0.438438	1.11971
					-0.434434	1.33495
					-0.43043	1.55019
					-0.426426	1.76543
					-0.422422	1.98066
					-0.418418	2.1959
					-0.414414	2.41114
					-0.41041	2.62638
					-0.406406	2.84162
					-0.402402	3.05686
					-0.398398	3.2721
					-0.394394	3.48734
					-0.39039	3.70258
					-0.386386	3.91782
					-0.382382	4.13306
					-0.378378	4.3483
					-0.374374	4.56354
					-0.37037	4.77878
					-0.366366	4.99401
					-0.362362	5.20925
					-0.358358	5.42449
					-0.354354	5.63973
					-0.35035	5.85497
					-0.346346	6.07021
					-0.342342	6.28545
					-0.338338	6.50069
					-0.334334	6.71593
					-0.33033	6.93117
					-0.326326	7.14641
					-0.322322	7.36165
					-0.318318	7.57689
					-0.314314	7.79212
					-0.31031	8.00736
					-0.306306	8.2226
					-0.302302	8.43784
					-0.298298	8.65308
					-0.294294	8.86832
					-0.29029	9.08356
					-0.286286	9.2988
					-0.282282	9.51404
					-0.278278	9.72928
					-0.274274	9.94452
					-0.27027	10.1598
					-0.266266	10.375
					-0.262262	10.5902
					-0.258258	10.8055
					-0.254254	11.0207
					-0.25025	11.236
					-0.246246	11.4512
					-0.242242	11.6664
					-0.238238	11.8817
					-0.234234	12.0969
					-0.23023	12.3121
					-0.226226	12.5274
					-0.222222	12.7426
					-0.218218	12.9579
					-0.214214	13.1731
					-0.21021	13.3883
					-0.206206	13.6036
					-0.202202	13.8188
					-0.198198	14.0341
					-0.194194	14.2493
					-0.19019	14.4645
					-0.186186	14.6798
					-0.182182	14.895
					-0.178178	15.1103
					-0.174174	15.3255
					-0.17017	15.5407
					-0.166166	15.756
					-0.162162	15.9712
					-0.158158	16.1865
					-0.154154	16.4017
					-0.15015	16.6169
					-0.146146	16.8322
					-0.142142	17.0474
					-0.138138	17.2627
					-0.134134	17.4779
					-0.13013	17.6931
					-0.126126	17.9084
					-0.122122	18.1236
					-0.118118	18.3388
					-0.114114	18.5541
					-0.11011	18.7693
					-0.106106	18.9846
					-0.102102	19.1998
					-0.0980981	19.415
					-0.0940941	19.6303
					-0.0900901	19.8455
					-0.0860861	20.0608
					-0.0820821	20.276
					-0.0780781	20.4912
					-0.0740741	20.7065
					-0.0700701	20.9217
					-0.0660661	21.137
					-0.0620621	21.3522
					-0.0580581	21.5674
					-0.0540541	21.7827
					-0.05005	21.9979
					-0.046046	22.2132
					-0.042042	22.4284
					-0.038038	22.6436
					-0.034034	22.8589
					-0.03003	23.0741
					-0.026026	23.2894
					-0.022022	23.5046
					-0.018018	23.7198
					-0.014014	23.9351
					-0.01001	24.1503
					-0.00600601	24.3655
					-0.002002	24.5808
					0.002002	24.796
					0.00600601	25.0113
					0.01001	25.2265
					0.014014	25.4417
					0.018018	25.657
					0.022022	25.8722
					0.026026	26.0875
					0.03003	26.3027
					0.034034	26.5179
					0.038038	26.7332
					0.042042	26.9484
					0.046046	27.1637
					0.05005	27.3789
					0.0540541	27.5941
					0.0580581	27.8094
					0.0620621	28.0246
					0.0660661	28.2399
					0.0700701	28.4551
					0.0740741	28.6703
					0.0780781	28.8856
					0.0820821	29.1008
					0.0860861	29.3161
					0.0900901	29.5313
					0.0940941	29.7465
					0.0980981	29.9618
					0.102102	30.177
					0.106106	30.3922
					0.11011	30.6075
					0.114114	30.8227
					0.118118	31.038
					0.122122	31.2532
					0.126126	31.4684
					0.13013	31.6837
					0.134134	31.8989
					0.138138	32.1142
					0.142142	32.3294
					0.146146	32.5446
					0.15015	32.7599
					0.154154	32.9751
					0.158158	33.1904
					0.162162	33.4056
					0.166166	33.6208
					0.17017	33.8361
					0.174174	34.0513
					0.178178	34.2666
					0.182182	34.4818
					0.186186	34.697
					0.19019	34.9123
					0.194194	35.1275
					0.198198	35.3428
					0.202202	35.558
					0.206206	35.7732
					0.21021	35.9885
					0.214214	36.2037
					0.218218	36.419
					0.222222	36.6342
					0.226226	36.8494
					0.23023	37.0647
					0.234234	37.2799
					0.238238	37.4951
					0.242242	37.7104
					0.246246	37.9256
					0.25025	38.1409
					0.254254	38.3561
					0.258258	38.5713
					0.262262	38.7866
					0.266266	39.0018
					0.27027	39.2171
					0.274274	39.4323
					0.278278	39.6475
					0.282282	39.8628
					0.286286	40.078
					0.29029	40.2933
					0.294294	40.5085
					0.298298	40.7237
					0.302302	40.939
					0.306306	41.1542
					0.31031	41.3695
					0.314314	41.5847
					0.318318	41.7999
					0.322322	42.0152
					0.326326	42.2304
					0.33033	42.4457
					0.334334	42.6609
					0.338338	42.8761
					0.342342	43.0914
					0.346346	43.3066
					0.35035	43.5218
					0.354354	43.7371
					0.358358	43.9523
					0.362362	44.1676
					0.366366	44.3828
					0.37037	44.598
					0.374374	44.8133
					0.378378	45.0285
					0.382382	45.2438
					0.386386	45.459
					0.39039	45.6742
					0.394394	45.8895
					0.398398	46.1047
					0.402402	46.32
					0.406406	46.5352
					0.41041	46.7504
					0.414414	46.9657
					0.418418	47.1809
					0.422422	47.3961
					0.426426	47.6114
					0.43043	47.8266
					0.434434	48.0419
					0.438438	48.2571
					0.442442	48.4723
					0.446446	48.6876
					0.45045	48.9028
					0.454454	49.1181
					0.458458	49.3333
					0.462462	49.5485
					0.466466	49.7638
					0.47047	49.979
					0.474474	50.1943
					0.478478	50.4095
					0.482482	50.6247
					0.486486	50.84
					0.49049	51.0552
					0.494495	51.2705
					0.498499	51.4857
					0.502502	51.7009
					0.506506	51.9162
					0.51051	52.1314
					0.514514	52.3467
					0.518518	52.5619
					0.522523	52.7771
					0.526527	52.9924
					0.530531	53.2076
					0.534535	53.4228
					0.538539	53.6381
					0.542543	53.8533
					0.546547	54.0686
					0.550551	54.2838
					0.554555	54.499
					0.558559	54.7143
					0.562563	54.9295
					0.566567	55.1448
					0.570571	55.36
					0.574575	55.5752
					0.578579	55.7905
					0.582583	56.0057
					0.586587	56.221
					0.590591	56.4362
					0.594595	56.6514
					0.598599	56.8667
					0.602603	57.0819
					0.606607	57.2972
					0.610611	57.5124
					0.614615	57.7276
					0.618619	57.9429
					0.622623	58.1581
					0.626627	58.3734
					0.630631	58.5886
					0.634635	58.8038
					0.638639	59.0191
					0.642643	59.2343
					0.646647	59.4496
					0.650651	59.6648
					0.654655	59.88
					0.658659	60.0953
					0.662663	60.3105
					0.666667	60.5257
					0.670671	60.741
					0.674675	60.9562
					0.678679	61.1715
					0.682683	61.3867
					0.686687	61.6019
					0.690691	61.8172
					0.694695	62.0324
					0.698699	62.2477
					0.702703	62.4629
					0.706707	62.6781
					0.710711	62.8934
					0.714715	63.1086
					0.718719	63.3239
					0.722723	63.5391
					0.726727	63.7543
					0.730731	63.9696
					0.734735	64.1848
					0.738739	64.4001
					0.742743	64.6153
					0.746747	64.8305
					0.750751	65.0458
					0.754755	65.261
					0.758759	65.4762
					0.762763	65.6915
					0.766767	65.9067
					0.770771	66.122
					0.774775	66.3372
					0.778779	66.5524
					0.782783	66.7677
					0.786787	66.9829
					0.790791	67.1982
					0.794795	67.4134
					0.798799	67.6286
					0.802803	67.8439
					0.806807	68.0591
					0.810811	68.2744
					0.814815	68.4896
					0.818819	68.7048
					0.822823	68.9201
					0.826827	69.1353
					0.830831	69.3506
					0.834835	69.5658
					0.838839	69.781
					0.842843	69.9963
					0.846847	70.2115
					0.850851	70.4267
					0.854855	70.642
					0.858859	70.8572
					0.862863	71.0725
					0.866867	71.2877
					0.870871	71.5029
					0.874875	71.7182
					0.878879	71.9334
					0.882883	72.1487
					0.886887	72.3639
					0.890891	72.5791
					0.894895	72.7944
					0.898899	73.0096
					0.902903	73.2249
					0.906907	73.4401
					0.910911	73.6553
					0.914915	73.8706
					0.918919	74.0858
					0.922923	74.3011
					0.926927	74.5163
					0.930931	74.7315
					0.934935	74.9468
					0.938939	75.162
					0.942943	75.3773
					0.946947	75.5925
					0.950951	75.8077
					0.954955	76.023
					0.958959	76.2382
					0.962963	76.4535
					0.966967	76.6687
					0.970971	76.8839
					0.974975	77.0992
					0.978979	77.3144
					0.982983	77.5297
					0.986987	77.7449
					0.990991	77.9601
					0.994995	78.1754
					0.998999	78.3906
					1.003	78.6058
					1.00701	78.8211
					1.01101	79.0363
					1.01502	79.2516
					1.01902	79.4668
					1.02302	79.682
					1.02703	79.8973
					1.03103	80.1125
					1.03503	80.3278
					1.03904	80.543
					1.04304	80.7582
					1.04705	80.9735
					1.05105	81.1887
					1.05506	81.4039
					1.05906	81.6192
					1.06306	81.8344
					1.06707	82.0497
					1.07107	82.2649
					1.07508	82.4801
					1.07908	82.6954
					1.08308	82.9106
					1.08709	83.1259
					1.09109	83.3411
					1.09509	83.5563
					1.0991	83.7716
					1.1031	83.9868
					1.10711	84.2021
					1.11111	84.4173
					1.11512	84.6325
					1.11912	84.8478
					1.12312	85.063
					1.12713	85.2783
					1.13113	85.4935
					1.13514	85.7087
					1.13914	85.924
					1.14314	86.1392
					1.14715	86.3545
					1.15115	86.5697
					1.15516	86.7849
					1.15916	87.0002
					1.16316	87.2154
					1.16717	87.4307
					1.17117	87.6459
					1.17518	87.8611
					1.17918	88.0764
					1.18318	88.2916
					1.18719	88.5069
					1.19119	88.7221
					1.1952	88.9373
					1.1992	89.1526
					1.2032	89.3678
					1.20721	89.583
					1.21121	89.7983
					1.21522	90.0135
					1.21922	90.2288
					1.22322	90.444
					1.22723	90.6592
					1.23123	90.8745
					1.23524	91.0897
					1.23924	91.305
					1.24324	91.5202
					1.24725	91.7354
					1.25125	91.9507
					1.25526	92.1659
					1.25926	92.3812
					1.26326	92.5964
					1.26727	92.8116
					1.27127	93.0269
					1.27528	93.2421
					1.27928	93.4574
					1.28328	93.6726
					1.28729	93.8878
					1.29129	94.1031
					1.2953	94.3183
					1.2993	94.5336
					1.3033	94.7488
					1.30731	94.964
					1.31131	95.1793
					1.31532	95.3945
					1.31932	95.6098
					1.32332	95.825
					1.32733	96.0402
					1.33133	96.2555
					1.33534	96.4707
					1.33934	96.6859
					1.34334	96.9012
					1.34735	97.1164
					1.35135	97.3317
					1.35536	97.5469
					1.35936	97.7621
					1.36336	97.9774
					1.36737	98.1926
					1.37137	98.4079
					1.37538	98.6231
					1.37938	98.8383
					1.38338	99.0536
					1.38739	99.2688
					1.39139	99.4841
					1.3954	99.6993
					1.3994	99.9145
					1.4034	100.13
					1.40741	100.345
					1.41141	100.56
					1.41542	100.775
					1.41942	100.991
					1.42342	101.206
					1.42743	101.421
					1.43143	101.636
					1.43544	101.852
					1.43944	102.067
					1.44344	102.282
					1.44745	102.497
					1.45145	102.713
					1.45546	102.928
					1.45946	103.143
					1.46346	103.358
					1.46747	103.574
					1.47147	103.789
					1.47548	104.004
					1.47948	104.219
					1.48348	104.435
					1.48749	104.65
					1.49149	104.865
					1.4955	105.08
					1.4995	105.296
					1.5035	105.511
					1.50751	105.726
					1.51151	105.941
					1.51552	106.156
					1.51952	106.372
					1.52352	106.587
					1.52753	106.802
					1.53153	107.017
					1.53554	107.233
					1.53954	107.448
					1.54354	107.663
					1.54755	107.878
					1.55155	108.094
					1.55556	108.309
					1.55956	108.524
					1.56356	108.739
					1.56757	108.955
					1.57157	109.17
					1.57558	109.385
					1.57958	109.6
					1.58358	109.816
					1.58759	110.031
					1.59159	110.246
					1.5956	110.461
					1.5996	110.677
					1.6036	110.892
					1.60761	111.107
					1.61161	111.322
					1.61562	111.537
					1.61962	111.753
					1.62362	111.968
					1.62763	112.183
					1.63163	112.398
					1.63564	112.614
					1.63964	112.829
					1.64364	113.044
					1.64765	113.259
					1.65165	113.475
					1.65566	113.69
					1.65966	113.905
					1.66366	114.12
					1.66767	114.336
					1.67167	114.551
					1.67568	114.766
					1.67968	114.981
					1.68368	115.197
					1.68769	115.412
					1.69169	115.627
					1.6957	115.842
					1.6997	116.057
					1.7037	116.273
					1.70771	116.488
					1.71171	116.703
					1.71572	116.918
					1.71972	117.134
					1.72372	117.349
					1.72773	117.564
					1.73173	117.779
					1.73574	117.995
					1.73974	118.21
					1.74374	118.425
					1.74775	118.64
					1.75175	118.856
					1.75576	119.071
					1.75976	119.286
					1.76376	119.501
					1.76777	119.717
					1.77177	119.932
					1.77578	120.147
					1.77978	120.362
					1.78378	120.578
					1.78779	120.793
					1.79179	121.008
					1.7958	121.223
					1.7998	121.438
					1.8038	121.654
					1.80781	121.869
					1.81181	122.084
					1.81582	122.299
					1.81982	122.515
					1.82382	122.73
					1.82783	122.945
					1.83183	123.16
					1.83584	123.376
					1.83984	123.591
					1.84384	123.806
					1.84785	124.021
					1.85185	124.237
					1.85586	124.452
					1.85986	124.667
					1.86386	124.882
					1.86787	125.098
					1.87187	125.313
					1.87588	125.528
					1.87988	125.743
					1.88388	125.958
					1.88789	126.174
					1.89189	126.389
					1.8959	126.604
					1.8999	126.819
					1.9039	127.035
					1.90791	127.25
					1.91191	127.465
					1.91592	127.68
					1.91992	127.896
					1.92392	128.111
					1.92793	128.326
					1.93193	128.541
					1.93594	128.757
					1.93994	128.972
					1.94394	129.187
					1.94795	129.402
					1.95195	129.618
					1.95596	129.833
					1.95996	130.048
					1.96396	130.263
					1.96797	130.479
					1.97197	130.694
					1.97598	130.909
					1.97998	131.124
					1.98398	131.339
					1.98799	131.555
					1.99199	131.77
					1.996	131.985
					2	132.2

## Sheet: Fig.5g
	aggression	grooming	proximity
saline	0.38	0.22	0
OT	0.86	0.28	0

## Sheet: Fig.5h
saline	individual engagement index	distractor bias (ms)	fitted curve	individual engagement index	distractor bias (ms)		saline	individual engagement index	distractor bias (ms)	fitted curve	individual engagement index	distractor bias (ms)
sacatter point	0	69.3295		-2	-73.5127		sacatter point	0	71.5691		-2	-20.3892
	0.6	73.2394		-1.996	-73.3179			1.14	69.9843		-1.996	-20.2963
	0.38	61.6221		-1.99199	-73.1232			0.86	67.1013		-1.99199	-20.2033
	0	28.6945		-1.98799	-72.9285			0	33.737		-1.98799	-20.1104
	0.6	24.2456		-1.98398	-72.7338			1.14	24.0306		-1.98398	-20.0175
	0.38	44.9525		-1.97998	-72.5391			0.86	42.2092		-1.97998	-19.9245
	-0.6	-13.8104		-1.97598	-72.3443			-1.14	-2.84657		-1.97598	-19.8316
	-0.6	-5.41105		-1.97197	-72.1496			-1.14	-8.97728		-1.97197	-19.7387
	0.38	3.23905		-1.96797	-71.9549			0.86	13.0268		-1.96797	-19.6457
	-0.38	2.28001		-1.96396	-71.7602			-0.86	6.39525		-1.96396	-19.5528
	-0.38	-1.57795		-1.95996	-71.5654			-0.86	-1.38347		-1.95996	-19.4598
	-0.38	-1.78609		-1.95596	-71.3707			-0.86	-2.44939		-1.95596	-19.3669
				-1.95195	-71.176						-1.95195	-19.274
				-1.94795	-70.9813						-1.94795	-19.181
				-1.94394	-70.7866						-1.94394	-19.0881
				-1.93994	-70.5918						-1.93994	-18.9952
				-1.93594	-70.3971						-1.93594	-18.9022
				-1.93193	-70.2024						-1.93193	-18.8093
				-1.92793	-70.0077						-1.92793	-18.7163
				-1.92392	-69.8129						-1.92392	-18.6234
				-1.91992	-69.6182						-1.91992	-18.5305
				-1.91592	-69.4235						-1.91592	-18.4375
				-1.91191	-69.2288						-1.91191	-18.3446
				-1.90791	-69.034						-1.90791	-18.2517
				-1.9039	-68.8393						-1.9039	-18.1587
				-1.8999	-68.6446						-1.8999	-18.0658
				-1.8959	-68.4499						-1.8959	-17.9728
				-1.89189	-68.2552						-1.89189	-17.8799
				-1.88789	-68.0604						-1.88789	-17.787
				-1.88388	-67.8657						-1.88388	-17.694
				-1.87988	-67.671						-1.87988	-17.6011
				-1.87588	-67.4763						-1.87588	-17.5082
				-1.87187	-67.2815						-1.87187	-17.4152
				-1.86787	-67.0868						-1.86787	-17.3223
				-1.86386	-66.8921						-1.86386	-17.2293
				-1.85986	-66.6974						-1.85986	-17.1364
				-1.85586	-66.5027						-1.85586	-17.0435
				-1.85185	-66.3079						-1.85185	-16.9505
				-1.84785	-66.1132						-1.84785	-16.8576
				-1.84384	-65.9185						-1.84384	-16.7647
				-1.83984	-65.7238						-1.83984	-16.6717
				-1.83584	-65.529						-1.83584	-16.5788
				-1.83183	-65.3343						-1.83183	-16.4858
				-1.82783	-65.1396						-1.82783	-16.3929
				-1.82382	-64.9449						-1.82382	-16.3
				-1.81982	-64.7501						-1.81982	-16.207
				-1.81582	-64.5554						-1.81582	-16.1141
				-1.81181	-64.3607						-1.81181	-16.0212
				-1.80781	-64.166						-1.80781	-15.9282
				-1.8038	-63.9712						-1.8038	-15.8353
				-1.7998	-63.7765						-1.7998	-15.7423
				-1.7958	-63.5818						-1.7958	-15.6494
				-1.79179	-63.3871						-1.79179	-15.5565
				-1.78779	-63.1924						-1.78779	-15.4635
				-1.78378	-62.9976						-1.78378	-15.3706
				-1.77978	-62.8029						-1.77978	-15.2777
				-1.77578	-62.6082						-1.77578	-15.1847
				-1.77177	-62.4135						-1.77177	-15.0918
				-1.76777	-62.2187						-1.76777	-14.9988
				-1.76376	-62.024						-1.76376	-14.9059
				-1.75976	-61.8293						-1.75976	-14.813
				-1.75576	-61.6346						-1.75576	-14.72
				-1.75175	-61.4398						-1.75175	-14.6271
				-1.74775	-61.2451						-1.74775	-14.5342
				-1.74374	-61.0504						-1.74374	-14.4412
				-1.73974	-60.8557						-1.73974	-14.3483
				-1.73574	-60.661						-1.73574	-14.2553
				-1.73173	-60.4662						-1.73173	-14.1624
				-1.72773	-60.2715						-1.72773	-14.0695
				-1.72372	-60.0768						-1.72372	-13.9765
				-1.71972	-59.8821						-1.71972	-13.8836
				-1.71572	-59.6873						-1.71572	-13.7907
				-1.71171	-59.4926						-1.71171	-13.6977
				-1.70771	-59.2979						-1.70771	-13.6048
				-1.7037	-59.1032						-1.7037	-13.5118
				-1.6997	-58.9085						-1.6997	-13.4189
				-1.6957	-58.7137						-1.6957	-13.326
				-1.69169	-58.519						-1.69169	-13.233
				-1.68769	-58.3243						-1.68769	-13.1401
				-1.68368	-58.1296						-1.68368	-13.0472
				-1.67968	-57.9348						-1.67968	-12.9542
				-1.67568	-57.7401						-1.67568	-12.8613
				-1.67167	-57.5454						-1.67167	-12.7683
				-1.66767	-57.3507						-1.66767	-12.6754
				-1.66366	-57.1559						-1.66366	-12.5825
				-1.65966	-56.9612						-1.65966	-12.4895
				-1.65566	-56.7665						-1.65566	-12.3966
				-1.65165	-56.5718						-1.65165	-12.3037
				-1.64765	-56.3771						-1.64765	-12.2107
				-1.64364	-56.1823						-1.64364	-12.1178
				-1.63964	-55.9876						-1.63964	-12.0248
				-1.63564	-55.7929						-1.63564	-11.9319
				-1.63163	-55.5982						-1.63163	-11.839
				-1.62763	-55.4034						-1.62763	-11.746
				-1.62362	-55.2087						-1.62362	-11.6531
				-1.61962	-55.014						-1.61962	-11.5602
				-1.61562	-54.8193						-1.61562	-11.4672
				-1.61161	-54.6245						-1.61161	-11.3743
				-1.60761	-54.4298						-1.60761	-11.2813
				-1.6036	-54.2351						-1.6036	-11.1884
				-1.5996	-54.0404						-1.5996	-11.0955
				-1.5956	-53.8457						-1.5956	-11.0025
				-1.59159	-53.6509						-1.59159	-10.9096
				-1.58759	-53.4562						-1.58759	-10.8167
				-1.58358	-53.2615						-1.58358	-10.7237
				-1.57958	-53.0668						-1.57958	-10.6308
				-1.57558	-52.872						-1.57558	-10.5378
				-1.57157	-52.6773						-1.57157	-10.4449
				-1.56757	-52.4826						-1.56757	-10.352
				-1.56356	-52.2879						-1.56356	-10.259
				-1.55956	-52.0932						-1.55956	-10.1661
				-1.55556	-51.8984						-1.55556	-10.0732
				-1.55155	-51.7037						-1.55155	-9.98022
				-1.54755	-51.509						-1.54755	-9.88728
				-1.54354	-51.3143						-1.54354	-9.79434
				-1.53954	-51.1195						-1.53954	-9.7014
				-1.53554	-50.9248						-1.53554	-9.60847
				-1.53153	-50.7301						-1.53153	-9.51553
				-1.52753	-50.5354						-1.52753	-9.42259
				-1.52352	-50.3406						-1.52352	-9.32965
				-1.51952	-50.1459						-1.51952	-9.23672
				-1.51552	-49.9512						-1.51552	-9.14378
				-1.51151	-49.7565						-1.51151	-9.05084
				-1.50751	-49.5618						-1.50751	-8.9579
				-1.5035	-49.367						-1.5035	-8.86496
				-1.4995	-49.1723						-1.4995	-8.77203
				-1.4955	-48.9776						-1.4955	-8.67909
				-1.49149	-48.7829						-1.49149	-8.58615
				-1.48749	-48.5881						-1.48749	-8.49322
				-1.48348	-48.3934						-1.48348	-8.40028
				-1.47948	-48.1987						-1.47948	-8.30734
				-1.47548	-48.004						-1.47548	-8.2144
				-1.47147	-47.8092						-1.47147	-8.12147
				-1.46747	-47.6145						-1.46747	-8.02853
				-1.46346	-47.4198						-1.46346	-7.93559
				-1.45946	-47.2251						-1.45946	-7.84265
				-1.45546	-47.0304						-1.45546	-7.74972
				-1.45145	-46.8356						-1.45145	-7.65678
				-1.44745	-46.6409						-1.44745	-7.56384
				-1.44344	-46.4462						-1.44344	-7.4709
				-1.43944	-46.2515						-1.43944	-7.37796
				-1.43544	-46.0567						-1.43544	-7.28503
				-1.43143	-45.862						-1.43143	-7.19209
				-1.42743	-45.6673						-1.42743	-7.09915
				-1.42342	-45.4726						-1.42342	-7.00622
				-1.41942	-45.2779						-1.41942	-6.91328
				-1.41542	-45.0831						-1.41542	-6.82034
				-1.41141	-44.8884						-1.41141	-6.7274
				-1.40741	-44.6937						-1.40741	-6.63446
				-1.4034	-44.499						-1.4034	-6.54153
				-1.3994	-44.3042						-1.3994	-6.44859
				-1.3954	-44.1095						-1.3954	-6.35565
				-1.39139	-43.9148						-1.39139	-6.26272
				-1.38739	-43.7201						-1.38739	-6.16978
				-1.38338	-43.5253						-1.38338	-6.07684
				-1.37938	-43.3306						-1.37938	-5.9839
				-1.37538	-43.1359						-1.37538	-5.89096
				-1.37137	-42.9412						-1.37137	-5.79803
				-1.36737	-42.7465						-1.36737	-5.70509
				-1.36336	-42.5517						-1.36336	-5.61215
				-1.35936	-42.357						-1.35936	-5.51921
				-1.35536	-42.1623						-1.35536	-5.42628
				-1.35135	-41.9676						-1.35135	-5.33334
				-1.34735	-41.7728						-1.34735	-5.2404
				-1.34334	-41.5781						-1.34334	-5.14746
				-1.33934	-41.3834						-1.33934	-5.05453
				-1.33534	-41.1887						-1.33534	-4.96159
				-1.33133	-40.9939						-1.33133	-4.86865
				-1.32733	-40.7992						-1.32733	-4.77571
				-1.32332	-40.6045						-1.32332	-4.68278
				-1.31932	-40.4098						-1.31932	-4.58984
				-1.31532	-40.2151						-1.31532	-4.4969
				-1.31131	-40.0203						-1.31131	-4.40396
				-1.30731	-39.8256						-1.30731	-4.31103
				-1.3033	-39.6309						-1.3033	-4.21809
				-1.2993	-39.4362						-1.2993	-4.12515
				-1.2953	-39.2414						-1.2953	-4.03221
				-1.29129	-39.0467						-1.29129	-3.93928
				-1.28729	-38.852						-1.28729	-3.84634
				-1.28328	-38.6573						-1.28328	-3.7534
				-1.27928	-38.4625						-1.27928	-3.66046
				-1.27528	-38.2678						-1.27528	-3.56753
				-1.27127	-38.0731						-1.27127	-3.47459
				-1.26727	-37.8784						-1.26727	-3.38165
				-1.26326	-37.6837						-1.26326	-3.28871
				-1.25926	-37.4889						-1.25926	-3.19578
				-1.25526	-37.2942						-1.25526	-3.10284
				-1.25125	-37.0995						-1.25125	-3.0099
				-1.24725	-36.9048						-1.24725	-2.91696
				-1.24324	-36.71						-1.24324	-2.82403
				-1.23924	-36.5153						-1.23924	-2.73109
				-1.23524	-36.3206						-1.23524	-2.63815
				-1.23123	-36.1259						-1.23123	-2.54521
				-1.22723	-35.9312						-1.22723	-2.45228
				-1.22322	-35.7364						-1.22322	-2.35934
				-1.21922	-35.5417						-1.21922	-2.2664
				-1.21522	-35.347						-1.21522	-2.17346
				-1.21121	-35.1523						-1.21121	-2.08053
				-1.20721	-34.9575						-1.20721	-1.98759
				-1.2032	-34.7628						-1.2032	-1.89465
				-1.1992	-34.5681						-1.1992	-1.80171
				-1.1952	-34.3734						-1.1952	-1.70878
				-1.19119	-34.1786						-1.19119	-1.61584
				-1.18719	-33.9839						-1.18719	-1.5229
				-1.18318	-33.7892						-1.18318	-1.42996
				-1.17918	-33.5945						-1.17918	-1.33703
				-1.17518	-33.3997						-1.17518	-1.24409
				-1.17117	-33.205						-1.17117	-1.15115
				-1.16717	-33.0103						-1.16717	-1.05821
				-1.16316	-32.8156						-1.16316	-0.965275
				-1.15916	-32.6209						-1.15916	-0.872338
				-1.15516	-32.4261						-1.15516	-0.7794
				-1.15115	-32.2314						-1.15115	-0.686463
				-1.14715	-32.0367						-1.14715	-0.593525
				-1.14314	-31.842						-1.14314	-0.500588
				-1.13914	-31.6472						-1.13914	-0.40765
				-1.13514	-31.4525						-1.13514	-0.314713
				-1.13113	-31.2578						-1.13113	-0.221775
				-1.12713	-31.0631						-1.12713	-0.128838
				-1.12312	-30.8684						-1.12312	-0.0359001
				-1.11912	-30.6736						-1.11912	0.0570375
				-1.11512	-30.4789						-1.11512	0.149975
				-1.11111	-30.2842						-1.11111	0.242913
				-1.10711	-30.0895						-1.10711	0.33585
				-1.1031	-29.8947						-1.1031	0.428788
				-1.0991	-29.7						-1.0991	0.521725
				-1.09509	-29.5053						-1.09509	0.614663
				-1.09109	-29.3106						-1.09109	0.7076
				-1.08709	-29.1158						-1.08709	0.800538
				-1.08308	-28.9211						-1.08308	0.893475
				-1.07908	-28.7264						-1.07908	0.986413
				-1.07508	-28.5317						-1.07508	1.07935
				-1.07107	-28.337						-1.07107	1.17229
				-1.06707	-28.1422						-1.06707	1.26523
				-1.06306	-27.9475						-1.06306	1.35816
				-1.05906	-27.7528						-1.05906	1.4511
				-1.05506	-27.5581						-1.05506	1.54404
				-1.05105	-27.3633						-1.05105	1.63698
				-1.04705	-27.1686						-1.04705	1.72991
				-1.04304	-26.9739						-1.04304	1.82285
				-1.03904	-26.7792						-1.03904	1.91579
				-1.03503	-26.5845						-1.03503	2.00873
				-1.03103	-26.3897						-1.03103	2.10166
				-1.02703	-26.195						-1.02703	2.1946
				-1.02302	-26.0003						-1.02302	2.28754
				-1.01902	-25.8056						-1.01902	2.38048
				-1.01502	-25.6108						-1.01502	2.47341
				-1.01101	-25.4161						-1.01101	2.56635
				-1.00701	-25.2214						-1.00701	2.65929
				-1.003	-25.0267						-1.003	2.75223
				-0.998999	-24.8319						-0.998999	2.84516
				-0.994995	-24.6372						-0.994995	2.9381
				-0.990991	-24.4425						-0.990991	3.03104
				-0.986987	-24.2478						-0.986987	3.12398
				-0.982983	-24.0531						-0.982983	3.21691
				-0.978979	-23.8583						-0.978979	3.30985
				-0.974975	-23.6636						-0.974975	3.40279
				-0.970971	-23.4689						-0.970971	3.49573
				-0.966967	-23.2742						-0.966967	3.58866
				-0.962963	-23.0794						-0.962963	3.6816
				-0.958959	-22.8847						-0.958959	3.77454
				-0.954955	-22.69						-0.954955	3.86748
				-0.950951	-22.4953						-0.950951	3.96041
				-0.946947	-22.3005						-0.946947	4.05335
				-0.942943	-22.1058						-0.942943	4.14629
				-0.938939	-21.9111						-0.938939	4.23923
				-0.934935	-21.7164						-0.934935	4.33216
				-0.930931	-21.5217						-0.930931	4.4251
				-0.926927	-21.3269						-0.926927	4.51804
				-0.922923	-21.1322						-0.922923	4.61098
				-0.918919	-20.9375						-0.918919	4.70391
				-0.914915	-20.7428						-0.914915	4.79685
				-0.910911	-20.548						-0.910911	4.88979
				-0.906907	-20.3533						-0.906907	4.98273
				-0.902903	-20.1586						-0.902903	5.07566
				-0.898899	-19.9639						-0.898899	5.1686
				-0.894895	-19.7691						-0.894895	5.26154
				-0.890891	-19.5744						-0.890891	5.35448
				-0.886887	-19.3797						-0.886887	5.44741
				-0.882883	-19.185						-0.882883	5.54035
				-0.878879	-18.9903						-0.878879	5.63329
				-0.874875	-18.7955						-0.874875	5.72623
				-0.870871	-18.6008						-0.870871	5.81916
				-0.866867	-18.4061						-0.866867	5.9121
				-0.862863	-18.2114						-0.862863	6.00504
				-0.858859	-18.0166						-0.858859	6.09798
				-0.854855	-17.8219						-0.854855	6.19091
				-0.850851	-17.6272						-0.850851	6.28385
				-0.846847	-17.4325						-0.846847	6.37679
				-0.842843	-17.2377						-0.842843	6.46973
				-0.838839	-17.043						-0.838839	6.56266
				-0.834835	-16.8483						-0.834835	6.6556
				-0.830831	-16.6536						-0.830831	6.74854
				-0.826827	-16.4589						-0.826827	6.84148
				-0.822823	-16.2641						-0.822823	6.93442
				-0.818819	-16.0694						-0.818819	7.02735
				-0.814815	-15.8747						-0.814815	7.12029
				-0.810811	-15.68						-0.810811	7.21323
				-0.806807	-15.4852						-0.806807	7.30617
				-0.802803	-15.2905						-0.802803	7.3991
				-0.798799	-15.0958						-0.798799	7.49204
				-0.794795	-14.9011						-0.794795	7.58498
				-0.790791	-14.7064						-0.790791	7.67791
				-0.786787	-14.5116						-0.786787	7.77085
				-0.782783	-14.3169						-0.782783	7.86379
				-0.778779	-14.1222						-0.778779	7.95673
				-0.774775	-13.9275						-0.774775	8.04966
				-0.770771	-13.7327						-0.770771	8.1426
				-0.766767	-13.538						-0.766767	8.23554
				-0.762763	-13.3433						-0.762763	8.32848
				-0.758759	-13.1486						-0.758759	8.42141
				-0.754755	-12.9538						-0.754755	8.51435
				-0.750751	-12.7591						-0.750751	8.60729
				-0.746747	-12.5644						-0.746747	8.70023
				-0.742743	-12.3697						-0.742743	8.79317
				-0.738739	-12.175						-0.738739	8.8861
				-0.734735	-11.9802						-0.734735	8.97904
				-0.730731	-11.7855						-0.730731	9.07198
				-0.726727	-11.5908						-0.726727	9.16492
				-0.722723	-11.3961						-0.722723	9.25785
				-0.718719	-11.2013						-0.718719	9.35079
				-0.714715	-11.0066						-0.714715	9.44373
				-0.710711	-10.8119						-0.710711	9.53667
				-0.706707	-10.6172						-0.706707	9.6296
				-0.702703	-10.4224						-0.702703	9.72254
				-0.698699	-10.2277						-0.698699	9.81548
				-0.694695	-10.033						-0.694695	9.90842
				-0.690691	-9.83828						-0.690691	10.0014
				-0.686687	-9.64356						-0.686687	10.0943
				-0.682683	-9.44883						-0.682683	10.1872
				-0.678679	-9.25411						-0.678679	10.2802
				-0.674675	-9.05939						-0.674675	10.3731
				-0.670671	-8.86466						-0.670671	10.466
				-0.666667	-8.66994						-0.666667	10.559
				-0.662663	-8.47522						-0.662663	10.6519
				-0.658659	-8.2805						-0.658659	10.7449
				-0.654655	-8.08577						-0.654655	10.8378
				-0.650651	-7.89105						-0.650651	10.9307
				-0.646647	-7.69633						-0.646647	11.0237
				-0.642643	-7.5016						-0.642643	11.1166
				-0.638639	-7.30688						-0.638639	11.2095
				-0.634635	-7.11216						-0.634635	11.3025
				-0.630631	-6.91743						-0.630631	11.3954
				-0.626627	-6.72271						-0.626627	11.4884
				-0.622623	-6.52799						-0.622623	11.5813
				-0.618619	-6.33327						-0.618619	11.6742
				-0.614615	-6.13854						-0.614615	11.7672
				-0.610611	-5.94382						-0.610611	11.8601
				-0.606607	-5.7491						-0.606607	11.953
				-0.602603	-5.55437						-0.602603	12.046
				-0.598599	-5.35965						-0.598599	12.1389
				-0.594595	-5.16493						-0.594595	12.2319
				-0.590591	-4.97021						-0.590591	12.3248
				-0.586587	-4.77548						-0.586587	12.4177
				-0.582583	-4.58076						-0.582583	12.5107
				-0.578579	-4.38604						-0.578579	12.6036
				-0.574575	-4.19131						-0.574575	12.6965
				-0.570571	-3.99659						-0.570571	12.7895
				-0.566567	-3.80187						-0.566567	12.8824
				-0.562563	-3.60714						-0.562563	12.9754
				-0.558559	-3.41242						-0.558559	13.0683
				-0.554555	-3.2177						-0.554555	13.1612
				-0.550551	-3.02298						-0.550551	13.2542
				-0.546547	-2.82825						-0.546547	13.3471
				-0.542543	-2.63353						-0.542543	13.44
				-0.538539	-2.43881						-0.538539	13.533
				-0.534535	-2.24408						-0.534535	13.6259
				-0.530531	-2.04936						-0.530531	13.7189
				-0.526527	-1.85464						-0.526527	13.8118
				-0.522523	-1.65992						-0.522523	13.9047
				-0.518518	-1.46519						-0.518518	13.9977
				-0.514514	-1.27047						-0.514514	14.0906
				-0.51051	-1.07575						-0.51051	14.1835
				-0.506506	-0.881024						-0.506506	14.2765
				-0.502502	-0.686301						-0.502502	14.3694
				-0.498499	-0.491578						-0.498499	14.4624
				-0.494495	-0.296855						-0.494495	14.5553
				-0.49049	-0.102132						-0.49049	14.6482
				-0.486486	0.0925908						-0.486486	14.7412
				-0.482482	0.287314						-0.482482	14.8341
				-0.478478	0.482037						-0.478478	14.927
				-0.474474	0.67676						-0.474474	15.02
				-0.47047	0.871482						-0.47047	15.1129
				-0.466466	1.06621						-0.466466	15.2059
				-0.462462	1.26093						-0.462462	15.2988
				-0.458458	1.45565						-0.458458	15.3917
				-0.454454	1.65037						-0.454454	15.4847
				-0.45045	1.8451						-0.45045	15.5776
				-0.446446	2.03982						-0.446446	15.6705
				-0.442442	2.23454						-0.442442	15.7635
				-0.438438	2.42927						-0.438438	15.8564
				-0.434434	2.62399						-0.434434	15.9494
				-0.43043	2.81871						-0.43043	16.0423
				-0.426426	3.01343						-0.426426	16.1352
				-0.422422	3.20816						-0.422422	16.2282
				-0.418418	3.40288						-0.418418	16.3211
				-0.414414	3.5976						-0.414414	16.414
				-0.41041	3.79233						-0.41041	16.507
				-0.406406	3.98705						-0.406406	16.5999
				-0.402402	4.18177						-0.402402	16.6929
				-0.398398	4.3765						-0.398398	16.7858
				-0.394394	4.57122						-0.394394	16.8787
				-0.39039	4.76594						-0.39039	16.9717
				-0.386386	4.96066						-0.386386	17.0646
				-0.382382	5.15539						-0.382382	17.1575
				-0.378378	5.35011						-0.378378	17.2505
				-0.374374	5.54483						-0.374374	17.3434
				-0.37037	5.73956						-0.37037	17.4364
				-0.366366	5.93428						-0.366366	17.5293
				-0.362362	6.129						-0.362362	17.6222
				-0.358358	6.32372						-0.358358	17.7152
				-0.354354	6.51845						-0.354354	17.8081
				-0.35035	6.71317						-0.35035	17.901
				-0.346346	6.90789						-0.346346	17.994
				-0.342342	7.10262						-0.342342	18.0869
				-0.338338	7.29734						-0.338338	18.1799
				-0.334334	7.49206						-0.334334	18.2728
				-0.33033	7.68678						-0.33033	18.3657
				-0.326326	7.88151						-0.326326	18.4587
				-0.322322	8.07623						-0.322322	18.5516
				-0.318318	8.27095						-0.318318	18.6445
				-0.314314	8.46568						-0.314314	18.7375
				-0.31031	8.6604						-0.31031	18.8304
				-0.306306	8.85512						-0.306306	18.9234
				-0.302302	9.04984						-0.302302	19.0163
				-0.298298	9.24457						-0.298298	19.1092
				-0.294294	9.43929						-0.294294	19.2022
				-0.29029	9.63401						-0.29029	19.2951
				-0.286286	9.82874						-0.286286	19.388
				-0.282282	10.0235						-0.282282	19.481
				-0.278278	10.2182						-0.278278	19.5739
				-0.274274	10.4129						-0.274274	19.6669
				-0.27027	10.6076						-0.27027	19.7598
				-0.266266	10.8024						-0.266266	19.8527
				-0.262262	10.9971						-0.262262	19.9457
				-0.258258	11.1918						-0.258258	20.0386
				-0.254254	11.3865						-0.254254	20.1315
				-0.25025	11.5812						-0.25025	20.2245
				-0.246246	11.776						-0.246246	20.3174
				-0.242242	11.9707						-0.242242	20.4104
				-0.238238	12.1654						-0.238238	20.5033
				-0.234234	12.3601						-0.234234	20.5962
				-0.23023	12.5549						-0.23023	20.6892
				-0.226226	12.7496						-0.226226	20.7821
				-0.222222	12.9443						-0.222222	20.875
				-0.218218	13.139						-0.218218	20.968
				-0.214214	13.3337						-0.214214	21.0609
				-0.21021	13.5285						-0.21021	21.1539
				-0.206206	13.7232						-0.206206	21.2468
				-0.202202	13.9179						-0.202202	21.3397
				-0.198198	14.1126						-0.198198	21.4327
				-0.194194	14.3074						-0.194194	21.5256
				-0.19019	14.5021						-0.19019	21.6185
				-0.186186	14.6968						-0.186186	21.7115
				-0.182182	14.8915						-0.182182	21.8044
				-0.178178	15.0863						-0.178178	21.8974
				-0.174174	15.281						-0.174174	21.9903
				-0.17017	15.4757						-0.17017	22.0832
				-0.166166	15.6704						-0.166166	22.1762
				-0.162162	15.8651						-0.162162	22.2691
				-0.158158	16.0599						-0.158158	22.362
				-0.154154	16.2546						-0.154154	22.455
				-0.15015	16.4493						-0.15015	22.5479
				-0.146146	16.644						-0.146146	22.6409
				-0.142142	16.8388						-0.142142	22.7338
				-0.138138	17.0335						-0.138138	22.8267
				-0.134134	17.2282						-0.134134	22.9197
				-0.13013	17.4229						-0.13013	23.0126
				-0.126126	17.6177						-0.126126	23.1055
				-0.122122	17.8124						-0.122122	23.1985
				-0.118118	18.0071						-0.118118	23.2914
				-0.114114	18.2018						-0.114114	23.3844
				-0.11011	18.3965						-0.11011	23.4773
				-0.106106	18.5913						-0.106106	23.5702
				-0.102102	18.786						-0.102102	23.6632
				-0.0980981	18.9807						-0.0980981	23.7561
				-0.0940941	19.1754						-0.0940941	23.849
				-0.0900901	19.3702						-0.0900901	23.942
				-0.0860861	19.5649						-0.0860861	24.0349
				-0.0820821	19.7596						-0.0820821	24.1279
				-0.0780781	19.9543						-0.0780781	24.2208
				-0.0740741	20.1491						-0.0740741	24.3137
				-0.0700701	20.3438						-0.0700701	24.4067
				-0.0660661	20.5385						-0.0660661	24.4996
				-0.0620621	20.7332						-0.0620621	24.5925
				-0.0580581	20.9279						-0.0580581	24.6855
				-0.0540541	21.1227						-0.0540541	24.7784
				-0.05005	21.3174						-0.05005	24.8714
				-0.046046	21.5121						-0.046046	24.9643
				-0.042042	21.7068						-0.042042	25.0572
				-0.038038	21.9016						-0.038038	25.1502
				-0.034034	22.0963						-0.034034	25.2431
				-0.03003	22.291						-0.03003	25.336
				-0.026026	22.4857						-0.026026	25.429
				-0.022022	22.6804						-0.022022	25.5219
				-0.018018	22.8752						-0.018018	25.6149
				-0.014014	23.0699						-0.014014	25.7078
				-0.01001	23.2646						-0.01001	25.8007
				-0.00600601	23.4593						-0.00600601	25.8937
				-0.002002	23.6541						-0.002002	25.9866
				0.002002	23.8488						0.002002	26.0795
				0.00600601	24.0435						0.00600601	26.1725
				0.01001	24.2382						0.01001	26.2654
				0.014014	24.433						0.014014	26.3584
				0.018018	24.6277						0.018018	26.4513
				0.022022	24.8224						0.022022	26.5442
				0.026026	25.0171						0.026026	26.6372
				0.03003	25.2118						0.03003	26.7301
				0.034034	25.4066						0.034034	26.823
				0.038038	25.6013						0.038038	26.916
				0.042042	25.796						0.042042	27.0089
				0.046046	25.9907						0.046046	27.1019
				0.05005	26.1855						0.05005	27.1948
				0.0540541	26.3802						0.0540541	27.2877
				0.0580581	26.5749						0.0580581	27.3807
				0.0620621	26.7696						0.0620621	27.4736
				0.0660661	26.9644						0.0660661	27.5665
				0.0700701	27.1591						0.0700701	27.6595
				0.0740741	27.3538						0.0740741	27.7524
				0.0780781	27.5485						0.0780781	27.8454
				0.0820821	27.7432						0.0820821	27.9383
				0.0860861	27.938						0.0860861	28.0312
				0.0900901	28.1327						0.0900901	28.1242
				0.0940941	28.3274						0.0940941	28.2171
				0.0980981	28.5221						0.0980981	28.31
				0.102102	28.7169						0.102102	28.403
				0.106106	28.9116						0.106106	28.4959
				0.11011	29.1063						0.11011	28.5889
				0.114114	29.301						0.114114	28.6818
				0.118118	29.4958						0.118118	28.7747
				0.122122	29.6905						0.122122	28.8677
				0.126126	29.8852						0.126126	28.9606
				0.13013	30.0799						0.13013	29.0535
				0.134134	30.2746						0.134134	29.1465
				0.138138	30.4694						0.138138	29.2394
				0.142142	30.6641						0.142142	29.3324
				0.146146	30.8588						0.146146	29.4253
				0.15015	31.0535						0.15015	29.5182
				0.154154	31.2483						0.154154	29.6112
				0.158158	31.443						0.158158	29.7041
				0.162162	31.6377						0.162162	29.797
				0.166166	31.8324						0.166166	29.89
				0.17017	32.0271						0.17017	29.9829
				0.174174	32.2219						0.174174	30.0759
				0.178178	32.4166						0.178178	30.1688
				0.182182	32.6113						0.182182	30.2617
				0.186186	32.806						0.186186	30.3547
				0.19019	33.0008						0.19019	30.4476
				0.194194	33.1955						0.194194	30.5405
				0.198198	33.3902						0.198198	30.6335
				0.202202	33.5849						0.202202	30.7264
				0.206206	33.7797						0.206206	30.8194
				0.21021	33.9744						0.21021	30.9123
				0.214214	34.1691						0.214214	31.0052
				0.218218	34.3638						0.218218	31.0982
				0.222222	34.5585						0.222222	31.1911
				0.226226	34.7533						0.226226	31.284
				0.23023	34.948						0.23023	31.377
				0.234234	35.1427						0.234234	31.4699
				0.238238	35.3374						0.238238	31.5629
				0.242242	35.5322						0.242242	31.6558
				0.246246	35.7269						0.246246	31.7487
				0.25025	35.9216						0.25025	31.8417
				0.254254	36.1163						0.254254	31.9346
				0.258258	36.3111						0.258258	32.0275
				0.262262	36.5058						0.262262	32.1205
				0.266266	36.7005						0.266266	32.2134
				0.27027	36.8952						0.27027	32.3064
				0.274274	37.0899						0.274274	32.3993
				0.278278	37.2847						0.278278	32.4922
				0.282282	37.4794						0.282282	32.5852
				0.286286	37.6741						0.286286	32.6781
				0.29029	37.8688						0.29029	32.7711
				0.294294	38.0636						0.294294	32.864
				0.298298	38.2583						0.298298	32.9569
				0.302302	38.453						0.302302	33.0499
				0.306306	38.6477						0.306306	33.1428
				0.31031	38.8425						0.31031	33.2357
				0.314314	39.0372						0.314314	33.3287
				0.318318	39.2319						0.318318	33.4216
				0.322322	39.4266						0.322322	33.5145
				0.326326	39.6213						0.326326	33.6075
				0.33033	39.8161						0.33033	33.7004
				0.334334	40.0108						0.334334	33.7934
				0.338338	40.2055						0.338338	33.8863
				0.342342	40.4002						0.342342	33.9792
				0.346346	40.595						0.346346	34.0722
				0.35035	40.7897						0.35035	34.1651
				0.354354	40.9844						0.354354	34.258
				0.358358	41.1791						0.358358	34.351
				0.362362	41.3738						0.362362	34.4439
				0.366366	41.5686						0.366366	34.5369
				0.37037	41.7633						0.37037	34.6298
				0.374374	41.958						0.374374	34.7227
				0.378378	42.1527						0.378378	34.8157
				0.382382	42.3475						0.382382	34.9086
				0.386386	42.5422						0.386386	35.0016
				0.39039	42.7369						0.39039	35.0945
				0.394394	42.9316						0.394394	35.1874
				0.398398	43.1264						0.398398	35.2804
				0.402402	43.3211						0.402402	35.3733
				0.406406	43.5158						0.406406	35.4662
				0.41041	43.7105						0.41041	35.5592
				0.414414	43.9052						0.414414	35.6521
				0.418418	44.1						0.418418	35.745
				0.422422	44.2947						0.422422	35.838
				0.426426	44.4894						0.426426	35.9309
				0.43043	44.6841						0.43043	36.0239
				0.434434	44.8789						0.434434	36.1168
				0.438438	45.0736						0.438438	36.2097
				0.442442	45.2683						0.442442	36.3027
				0.446446	45.463						0.446446	36.3956
				0.45045	45.6578						0.45045	36.4886
				0.454454	45.8525						0.454454	36.5815
				0.458458	46.0472						0.458458	36.6744
				0.462462	46.2419						0.462462	36.7674
				0.466466	46.4366						0.466466	36.8603
				0.47047	46.6314						0.47047	36.9532
				0.474474	46.8261						0.474474	37.0462
				0.478478	47.0208						0.478478	37.1391
				0.482482	47.2155						0.482482	37.2321
				0.486486	47.4103						0.486486	37.325
				0.49049	47.605						0.49049	37.4179
				0.494495	47.7997						0.494495	37.5109
				0.498499	47.9944						0.498499	37.6038
				0.502502	48.1891						0.502502	37.6967
				0.506506	48.3839						0.506506	37.7897
				0.51051	48.5786						0.51051	37.8826
				0.514514	48.7733						0.514514	37.9755
				0.518518	48.968						0.518518	38.0685
				0.522523	49.1628						0.522523	38.1614
				0.526527	49.3575						0.526527	38.2544
				0.530531	49.5522						0.530531	38.3473
				0.534535	49.7469						0.534535	38.4402
				0.538539	49.9417						0.538539	38.5332
				0.542543	50.1364						0.542543	38.6261
				0.546547	50.3311						0.546547	38.7191
				0.550551	50.5258						0.550551	38.812
				0.554555	50.7206						0.554555	38.9049
				0.558559	50.9153						0.558559	38.9979
				0.562563	51.11						0.562563	39.0908
				0.566567	51.3047						0.566567	39.1837
				0.570571	51.4994						0.570571	39.2767
				0.574575	51.6942						0.574575	39.3696
				0.578579	51.8889						0.578579	39.4626
				0.582583	52.0836						0.582583	39.5555
				0.586587	52.2783						0.586587	39.6484
				0.590591	52.4731						0.590591	39.7414
				0.594595	52.6678						0.594595	39.8343
				0.598599	52.8625						0.598599	39.9272
				0.602603	53.0572						0.602603	40.0202
				0.606607	53.252						0.606607	40.1131
				0.610611	53.4467						0.610611	40.206
				0.614615	53.6414						0.614615	40.299
				0.618619	53.8361						0.618619	40.3919
				0.622623	54.0308						0.622623	40.4849
				0.626627	54.2256						0.626627	40.5778
				0.630631	54.4203						0.630631	40.6707
				0.634635	54.615						0.634635	40.7637
				0.638639	54.8097						0.638639	40.8566
				0.642643	55.0045						0.642643	40.9496
				0.646647	55.1992						0.646647	41.0425
				0.650651	55.3939						0.650651	41.1354
				0.654655	55.5886						0.654655	41.2284
				0.658659	55.7833						0.658659	41.3213
				0.662663	55.9781						0.662663	41.4142
				0.666667	56.1728						0.666667	41.5072
				0.670671	56.3675						0.670671	41.6001
				0.674675	56.5622						0.674675	41.693
				0.678679	56.757						0.678679	41.786
				0.682683	56.9517						0.682683	41.8789
				0.686687	57.1464						0.686687	41.9719
				0.690691	57.3411						0.690691	42.0648
				0.694695	57.5359						0.694695	42.1577
				0.698699	57.7306						0.698699	42.2507
				0.702703	57.9253						0.702703	42.3436
				0.706707	58.12						0.706707	42.4366
				0.710711	58.3147						0.710711	42.5295
				0.714715	58.5095						0.714715	42.6224
				0.718719	58.7042						0.718719	42.7154
				0.722723	58.8989						0.722723	42.8083
				0.726727	59.0936						0.726727	42.9012
				0.730731	59.2884						0.730731	42.9942
				0.734735	59.4831						0.734735	43.0871
				0.738739	59.6778						0.738739	43.1801
				0.742743	59.8725						0.742743	43.273
				0.746747	60.0673						0.746747	43.3659
				0.750751	60.262						0.750751	43.4589
				0.754755	60.4567						0.754755	43.5518
				0.758759	60.6514						0.758759	43.6447
				0.762763	60.8461						0.762763	43.7377
				0.766767	61.0409						0.766767	43.8306
				0.770771	61.2356						0.770771	43.9236
				0.774775	61.4303						0.774775	44.0165
				0.778779	61.625						0.778779	44.1094
				0.782783	61.8198						0.782783	44.2024
				0.786787	62.0145						0.786787	44.2953
				0.790791	62.2092						0.790791	44.3882
				0.794795	62.4039						0.794795	44.4812
				0.798799	62.5986						0.798799	44.5741
				0.802803	62.7934						0.802803	44.6671
				0.806807	62.9881						0.806807	44.76
				0.810811	63.1828						0.810811	44.8529
				0.814815	63.3775						0.814815	44.9459
				0.818819	63.5723						0.818819	45.0388
				0.822823	63.767						0.822823	45.1317
				0.826827	63.9617						0.826827	45.2247
				0.830831	64.1564						0.830831	45.3176
				0.834835	64.3512						0.834835	45.4106
				0.838839	64.5459						0.838839	45.5035
				0.842843	64.7406						0.842843	45.5964
				0.846847	64.9353						0.846847	45.6894
				0.850851	65.13						0.850851	45.7823
				0.854855	65.3248						0.854855	45.8752
				0.858859	65.5195						0.858859	45.9682
				0.862863	65.7142						0.862863	46.0611
				0.866867	65.9089						0.866867	46.1541
				0.870871	66.1037						0.870871	46.247
				0.874875	66.2984						0.874875	46.3399
				0.878879	66.4931						0.878879	46.4329
				0.882883	66.6878						0.882883	46.5258
				0.886887	66.8825						0.886887	46.6187
				0.890891	67.0773						0.890891	46.7117
				0.894895	67.272						0.894895	46.8046
				0.898899	67.4667						0.898899	46.8976
				0.902903	67.6614						0.902903	46.9905
				0.906907	67.8562						0.906907	47.0834
				0.910911	68.0509						0.910911	47.1764
				0.914915	68.2456						0.914915	47.2693
				0.918919	68.4403						0.918919	47.3622
				0.922923	68.6351						0.922923	47.4552
				0.926927	68.8298						0.926927	47.5481
				0.930931	69.0245						0.930931	47.6411
				0.934935	69.2192						0.934935	47.734
				0.938939	69.4139						0.938939	47.8269
				0.942943	69.6087						0.942943	47.9199
				0.946947	69.8034						0.946947	48.0128
				0.950951	69.9981						0.950951	48.1057
				0.954955	70.1928						0.954955	48.1987
				0.958959	70.3876						0.958959	48.2916
				0.962963	70.5823						0.962963	48.3846
				0.966967	70.777						0.966967	48.4775
				0.970971	70.9717						0.970971	48.5704
				0.974975	71.1665						0.974975	48.6634
				0.978979	71.3612						0.978979	48.7563
				0.982983	71.5559						0.982983	48.8492
				0.986987	71.7506						0.986987	48.9422
				0.990991	71.9454						0.990991	49.0351
				0.994995	72.1401						0.994995	49.1281
				0.998999	72.3348						0.998999	49.221
				1.003	72.5295						1.003	49.3139
				1.00701	72.7242						1.00701	49.4069
				1.01101	72.919						1.01101	49.4998
				1.01502	73.1137						1.01502	49.5927
				1.01902	73.3084						1.01902	49.6857
				1.02302	73.5031						1.02302	49.7786
				1.02703	73.6979						1.02703	49.8716
				1.03103	73.8926						1.03103	49.9645
				1.03503	74.0873						1.03503	50.0574
				1.03904	74.282						1.03904	50.1504
				1.04304	74.4767						1.04304	50.2433
				1.04705	74.6715						1.04705	50.3362
				1.05105	74.8662						1.05105	50.4292
				1.05506	75.0609						1.05506	50.5221
				1.05906	75.2556						1.05906	50.6151
				1.06306	75.4504						1.06306	50.708
				1.06707	75.6451						1.06707	50.8009
				1.07107	75.8398						1.07107	50.8939
				1.07508	76.0345						1.07508	50.9868
				1.07908	76.2293						1.07908	51.0797
				1.08308	76.424						1.08308	51.1727
				1.08709	76.6187						1.08709	51.2656
				1.09109	76.8134						1.09109	51.3586
				1.09509	77.0081						1.09509	51.4515
				1.0991	77.2029						1.0991	51.5444
				1.1031	77.3976						1.1031	51.6374
				1.10711	77.5923						1.10711	51.7303
				1.11111	77.787						1.11111	51.8232
				1.11512	77.9818						1.11512	51.9162
				1.11912	78.1765						1.11912	52.0091
				1.12312	78.3712						1.12312	52.1021
				1.12713	78.5659						1.12713	52.195
				1.13113	78.7606						1.13113	52.2879
				1.13514	78.9554						1.13514	52.3809
				1.13914	79.1501						1.13914	52.4738
				1.14314	79.3448						1.14314	52.5667
				1.14715	79.5395						1.14715	52.6597
				1.15115	79.7343						1.15115	52.7526
				1.15516	79.929						1.15516	52.8456
				1.15916	80.1237						1.15916	52.9385
				1.16316	80.3184						1.16316	53.0314
				1.16717	80.5131						1.16717	53.1244
				1.17117	80.7079						1.17117	53.2173
				1.17518	80.9026						1.17518	53.3102
				1.17918	81.0973						1.17918	53.4032
				1.18318	81.292						1.18318	53.4961
				1.18719	81.4868						1.18719	53.5891
				1.19119	81.6815						1.19119	53.682
				1.1952	81.8762						1.1952	53.7749
				1.1992	82.0709						1.1992	53.8679
				1.2032	82.2657						1.2032	53.9608
				1.20721	82.4604						1.20721	54.0537
				1.21121	82.6551						1.21121	54.1467
				1.21522	82.8498						1.21522	54.2396
				1.21922	83.0446						1.21922	54.3326
				1.22322	83.2393						1.22322	54.4255
				1.22723	83.434						1.22723	54.5184
				1.23123	83.6287						1.23123	54.6114
				1.23524	83.8234						1.23524	54.7043
				1.23924	84.0182						1.23924	54.7972
				1.24324	84.2129						1.24324	54.8902
				1.24725	84.4076						1.24725	54.9831
				1.25125	84.6023						1.25125	55.0761
				1.25526	84.7971						1.25526	55.169
				1.25926	84.9918						1.25926	55.2619
				1.26326	85.1865						1.26326	55.3549
				1.26727	85.3812						1.26727	55.4478
				1.27127	85.576						1.27127	55.5407
				1.27528	85.7707						1.27528	55.6337
				1.27928	85.9654						1.27928	55.7266
				1.28328	86.1601						1.28328	55.8196
				1.28729	86.3548						1.28729	55.9125
				1.29129	86.5496						1.29129	56.0054
				1.2953	86.7443						1.2953	56.0984
				1.2993	86.939						1.2993	56.1913
				1.3033	87.1337						1.3033	56.2842
				1.30731	87.3285						1.30731	56.3772
				1.31131	87.5232						1.31131	56.4701
				1.31532	87.7179						1.31532	56.5631
				1.31932	87.9126						1.31932	56.656
				1.32332	88.1073						1.32332	56.7489
				1.32733	88.3021						1.32733	56.8419
				1.33133	88.4968						1.33133	56.9348
				1.33534	88.6915						1.33534	57.0277
				1.33934	88.8862						1.33934	57.1207
				1.34334	89.081						1.34334	57.2136
				1.34735	89.2757						1.34735	57.3066
				1.35135	89.4704						1.35135	57.3995
				1.35536	89.6651						1.35536	57.4924
				1.35936	89.8599						1.35936	57.5854
				1.36336	90.0546						1.36336	57.6783
				1.36737	90.2493						1.36737	57.7712
				1.37137	90.444						1.37137	57.8642
				1.37538	90.6388						1.37538	57.9571
				1.37938	90.8335						1.37938	58.0501
				1.38338	91.0282						1.38338	58.143
				1.38739	91.2229						1.38739	58.2359
				1.39139	91.4176						1.39139	58.3289
				1.3954	91.6124						1.3954	58.4218
				1.3994	91.8071						1.3994	58.5147
				1.4034	92.0018						1.4034	58.6077
				1.40741	92.1965						1.40741	58.7006
				1.41141	92.3912						1.41141	58.7936
				1.41542	92.586						1.41542	58.8865
				1.41942	92.7807						1.41942	58.9794
				1.42342	92.9754						1.42342	59.0724
				1.42743	93.1701						1.42743	59.1653
				1.43143	93.3649						1.43143	59.2582
				1.43544	93.5596						1.43544	59.3512
				1.43944	93.7543						1.43944	59.4441
				1.44344	93.949						1.44344	59.5371
				1.44745	94.1438						1.44745	59.63
				1.45145	94.3385						1.45145	59.7229
				1.45546	94.5332						1.45546	59.8159
				1.45946	94.7279						1.45946	59.9088
				1.46346	94.9227						1.46346	60.0017
				1.46747	95.1174						1.46747	60.0947
				1.47147	95.3121						1.47147	60.1876
				1.47548	95.5068						1.47548	60.2806
				1.47948	95.7015						1.47948	60.3735
				1.48348	95.8963						1.48348	60.4664
				1.48749	96.091						1.48749	60.5594
				1.49149	96.2857						1.49149	60.6523
				1.4955	96.4804						1.4955	60.7452
				1.4995	96.6752						1.4995	60.8382
				1.5035	96.8699						1.5035	60.9311
				1.50751	97.0646						1.50751	61.0241
				1.51151	97.2593						1.51151	61.117
				1.51552	97.454						1.51552	61.2099
				1.51952	97.6488						1.51952	61.3029
				1.52352	97.8435						1.52352	61.3958
				1.52753	98.0382						1.52753	61.4887
				1.53153	98.2329						1.53153	61.5817
				1.53554	98.4277						1.53554	61.6746
				1.53954	98.6224						1.53954	61.7676
				1.54354	98.8171						1.54354	61.8605
				1.54755	99.0118						1.54755	61.9534
				1.55155	99.2066						1.55155	62.0464
				1.55556	99.4013						1.55556	62.1393
				1.55956	99.596						1.55956	62.2322
				1.56356	99.7907						1.56356	62.3252
				1.56757	99.9855						1.56757	62.4181
				1.57157	100.18						1.57157	62.5111
				1.57558	100.375						1.57558	62.604
				1.57958	100.57						1.57958	62.6969
				1.58358	100.764						1.58358	62.7899
				1.58759	100.959						1.58759	62.8828
				1.59159	101.154						1.59159	62.9757
				1.5956	101.349						1.5956	63.0687
				1.5996	101.543						1.5996	63.1616
				1.6036	101.738						1.6036	63.2546
				1.60761	101.933						1.60761	63.3475
				1.61161	102.127						1.61161	63.4404
				1.61562	102.322						1.61562	63.5334
				1.61962	102.517						1.61962	63.6263
				1.62362	102.712						1.62362	63.7192
				1.62763	102.906						1.62763	63.8122
				1.63163	103.101						1.63163	63.9051
				1.63564	103.296						1.63564	63.9981
				1.63964	103.49						1.63964	64.091
				1.64364	103.685						1.64364	64.1839
				1.64765	103.88						1.64765	64.2769
				1.65165	104.075						1.65165	64.3698
				1.65566	104.269						1.65566	64.4627
				1.65966	104.464						1.65966	64.5557
				1.66366	104.659						1.66366	64.6486
				1.66767	104.854						1.66767	64.7416
				1.67167	105.048						1.67167	64.8345
				1.67568	105.243						1.67568	64.9274
				1.67968	105.438						1.67968	65.0204
				1.68368	105.632						1.68368	65.1133
				1.68769	105.827						1.68769	65.2062
				1.69169	106.022						1.69169	65.2992
				1.6957	106.217						1.6957	65.3921
				1.6997	106.411						1.6997	65.4851
				1.7037	106.606						1.7037	65.578
				1.70771	106.801						1.70771	65.6709
				1.71171	106.995						1.71171	65.7639
				1.71572	107.19						1.71572	65.8568
				1.71972	107.385						1.71972	65.9497
				1.72372	107.58						1.72372	66.0427
				1.72773	107.774						1.72773	66.1356
				1.73173	107.969						1.73173	66.2286
				1.73574	108.164						1.73574	66.3215
				1.73974	108.359						1.73974	66.4144
				1.74374	108.553						1.74374	66.5074
				1.74775	108.748						1.74775	66.6003
				1.75175	108.943						1.75175	66.6932
				1.75576	109.137						1.75576	66.7862
				1.75976	109.332						1.75976	66.8791
				1.76376	109.527						1.76376	66.9721
				1.76777	109.722						1.76777	67.065
				1.77177	109.916						1.77177	67.1579
				1.77578	110.111						1.77578	67.2509
				1.77978	110.306						1.77978	67.3438
				1.78378	110.5						1.78378	67.4368
				1.78779	110.695						1.78779	67.5297
				1.79179	110.89						1.79179	67.6226
				1.7958	111.085						1.7958	67.7156
				1.7998	111.279						1.7998	67.8085
				1.8038	111.474						1.8038	67.9014
				1.80781	111.669						1.80781	67.9944
				1.81181	111.864						1.81181	68.0873
				1.81582	112.058						1.81582	68.1803
				1.81982	112.253						1.81982	68.2732
				1.82382	112.448						1.82382	68.3661
				1.82783	112.642						1.82783	68.4591
				1.83183	112.837						1.83183	68.552
				1.83584	113.032						1.83584	68.6449
				1.83984	113.227						1.83984	68.7379
				1.84384	113.421						1.84384	68.8308
				1.84785	113.616						1.84785	68.9237
				1.85185	113.811						1.85185	69.0167
				1.85586	114.005						1.85586	69.1096
				1.85986	114.2						1.85986	69.2026
				1.86386	114.395						1.86386	69.2955
				1.86787	114.59						1.86787	69.3884
				1.87187	114.784						1.87187	69.4814
				1.87588	114.979						1.87588	69.5743
				1.87988	115.174						1.87988	69.6672
				1.88388	115.369						1.88388	69.7602
				1.88789	115.563						1.88789	69.8531
				1.89189	115.758						1.89189	69.9461
				1.8959	115.953						1.8959	70.039
				1.8999	116.147						1.8999	70.1319
				1.9039	116.342						1.9039	70.2249
				1.90791	116.537						1.90791	70.3178
				1.91191	116.732						1.91191	70.4107
				1.91592	116.926						1.91592	70.5037
				1.91992	117.121						1.91992	70.5966
				1.92392	117.316						1.92392	70.6896
				1.92793	117.511						1.92793	70.7825
				1.93193	117.705						1.93193	70.8754
				1.93594	117.9						1.93594	70.9684
				1.93994	118.095						1.93994	71.0613
				1.94394	118.289						1.94394	71.1543
				1.94795	118.484						1.94795	71.2472
				1.95195	118.679						1.95195	71.3401
				1.95596	118.874						1.95596	71.4331
				1.95996	119.068						1.95996	71.526
				1.96396	119.263						1.96396	71.6189
				1.96797	119.458						1.96797	71.7119
				1.97197	119.652						1.97197	71.8048
				1.97598	119.847						1.97598	71.8978
				1.97998	120.042						1.97998	71.9907
				1.98398	120.237						1.98398	72.0836
				1.98799	120.431						1.98799	72.1766
				1.99199	120.626						1.99199	72.2695
				1.996	120.821						1.996	72.3624
				2	121.016						2	72.4554
